# Supplementary material for: Progenitors oppositely polarize WNT activators and inhibitors to orchestrate tissue development
Source: eLife. 2020 Apr 20;9:e54304. doi: 10.7554/eLife.54304 (PMC7224699; doi:10.7554/eLife.54304)
Supplement: Figure 1—source data 1. [file elife-54304-fig1-data1.xlsx]

## Sheet: Distribution
Figure 1D : Figure 1D : Quantifications showing Apc null clusters of broader size and shape than Apc heterozygous (het) placodes, which were analogous to wild-type in this assay (Circularity =1 perfect circle)
APC HET		Placode/mm2	APC cKO		Cluster/mm2	WT Placodes/mm2
Embryo 1	Field 1	5	Embryo 1	Field 1	26.8182	0
Embryo 2	Field 1	9.09091	Embryo 2	Field 1	11.8182	0.454545
Embryo 3	Field 1	14.4	Embryo 2	Field 2	10	1.81818
Embryo 4	Field 1	11.9048	Embryo 2	Field 3	10.9091	1.36364
Embryo 5	Field 1	12	Embryo 2	Field 4	7.72727	4.09091
Embryo 5	Field 2	13	Embryo 3	Field 1	28.1818	0
			Embryo 3	Field 2	21.3636	0
			Embryo 4	Field 1	9.54545	2.72727
			Embryo 4	Field 2	15.4545	0
			Embryo 5	Field 1	8.57143	0.952381
			Embryo 6	Field 1	8.09524	1.42857
			Embryo 6	Field 2	6.19048	2.38095
			Embryo 7	Field 1	17.8218	0
Each field measures 2.2 mm2

## Sheet: Area
Figure 1D : Figure 1D : Quantifications showing Apc null clusters of broader size and shape than Apc heterozygous (het) placodes, which were analogous to wild-type in this assay (Circularity =1 perfect circle)
APC HET		Area	APC cKO		Area
		Placode			Clusters
Embryo 1	1	2.74549	Embryo 1	1	2.28695
	2	3.72373		2	0.761295
	3	3.21722		3	0.264919
	4	4.11652		4	1.24119
	5	4.01883		5	1.35623
	6	3.21868		6	2.2903
	7	4.89363		7	1.1559
	8	3.81821		8	2.13582
	9	3.52049		9	1.78824
Embryo 2	1	5.6098		10	0.820562
	2	4.61165		11	0.549812
	3	5.43834		12	0.855773
	4	5.38673		13	2.29263
	5	6.47352		14	0.920727
	6	5.52465		15	1.57092
	7	4.74637		16	1.38743
	8	5.86845		17	2.25327
	9	6.64119		18	1.15692
	10	6.38837	Embryo 2	1	3.09385
	11	6.80157		2	1.66163
Embryo 3	1	3.33772		3	2.66191
	2	2.47177		4	0.628277
	3	2.31884		5	2.81484
	4	2.2341		6	1.43429
	5	4.01767		7	1.17595
	6	3.11658		8	2.19277
	7	3.07318		9	1.32062
	8	2.96365		10	1.28755
	9	2.90785	Embryo 3	1	6.96224
	10	3.18272		2	2.36225
	11	3.02565		3	3.56685
	12	4.53021		4	2.04266
	13	3.23852		5	0.606528
	14	2.2713		6	0.635105
	15	2.68051		7	3.32686
	16	3.00911		8	2.07648
	17	3.21165		9	1.89219
	18	3.72626		10	3.0521
	19	4.20573		11	1.87149
	20	2.89338		12	2.06365
	21	4.01353		13	3.79984
	22	3.43072		14	3.90336
	23	2.89751		15	1.93418
	24	2.55031		16	1.94905
	25	2.54617		17	4.33259
	26	3.39559		18	2.19954
	27	2.83551		19	2.28702
	28	4.32354		20	1.3017
	29	3.49686		21	1.25038
	30	3.63532		22	1.64521
	31	3.19512		23	1.04524
Embryo 4	1	5.13683		24	2.51104
	2	3.67387		25	1.14511
	3	5.13362		26	3.27933
	4	4.3183		27	2.69817
	5	4.51659		28	1.75368
	6	3.5479		29	4.45536
	7	4.4364		30	3.8879
	8	4.94663		31	3.46392
	9	2.99648	Embryo 3	2	3.68262
	10	5.30275		3	3.35267
	11	4.63002		4	3.28961
	12	4.56179		5	1.94344
	13	4.31101		6	1.22487
	14	2.99677		7	1.18098
Embryo 5	16	4.30052		8	1.51967
	17	3.74327		9	2.89151
	18	4.23491		10	2.79878
	1	3.10204		11	1.4752
	2	3.32657		12	4.50989
	3	4.26232		13	3.07463
	4	3.59193		14	3.26125
	5	3.38963		15	1.19301
	6	3.75931		16	1.40405
	7	6.11806		17	3.07317
	8	3.44117		18	11.8374
	9	5.47537		19	2.09012
	10	5.77339		20	3.20789
	11	4.11156		21	4.04026
	12	4.92746		22	1.60001
	13	4.91638	Embryo 3	1	4.70497
	14	5.62205		2	6.54875
	15	4.76154		3	5.36019
	16	5.846		4	5.43951
	17	7.2623		5	10.6055
Embryo 5	1	3.83891		6	1.36848
	2	3.4193		7	5.17284
	3	3.56598		8	1.42563
	4	4.96128		9	0.979776
	5	4.8356		10	4.49152
	6	5.04497		11	2.97899
	7	5.65208		12	10.6096
	8	3.17552		13	1.94701
	9	4.94729		14	5.09309
	10	4.94962		15	2.28469
	11	3.92056	Embryo 4	1	0.403006
	12	6.26124		2	1.11051
	13	4.12439		3	1.15597
	14	3.72723		4	2.26717
	15	4.10165		5	0.697167
	16	4.51164		6	1.59825
	17	5.93727		7	1.54934
	18	3.29282		8	0.57592
	19	5.55236		9	3.26332
	20	3.20673		10	3.62913
	21	3.68407		11	1.1794
Embryo 5	1	9.01081		12	2.15832
	2	5.80123		13	1.75463
	3	2.68464		14	1.46667
	4	2.70531		15	1.49905
	5	7.01645		16	1.49905
	6	6.68164		17	1.31787
	7	4.90841	Embryo 4	1	0.65101
	8	4.57567		2	1.03542
	9	4.2388		3	2.00539
	10	4.33594		4	0.849414
	11	4.79474		5	3.50512
	12	5.34035		6	0.440207
	13	7.64472		7	0.373384
	14	4.8905		8	3.71937
	15	3.57815		9	1.51282
	16	3.87506		10	2.05292
	17	2.23824		11	2.67982
	18	4.65627		12	0.717145
	19	9.18442		13	1.44324
	20	13.1525		14	1.24622
	21	4.95388		15	0.411962
	22	4.94355		16	2.07428
	23	4.53641	Embryo 4	1	0.869843
	24	2.22584		2	2.54188
	25	2.80245		3	1.27313
				4	3.58085
				5	1.66504
				6	0.526338
				7	1.74027
				8	2.25582
				9	1.57814
				10	2.2042
				11	1.19089
				12	1.77577
				13	2.08086
				14	1.05034
				15	7.4183
				16	3.80684
			Embryo 5	1	1.17457
				2	1.45436
				3	5.85504
				4	2.23234
				5	0.337819
				6	1.24644
				7	1.31307
				8	1.37766
				9	3.46311
				10	0.71165
				11	1.70717
				12	2.60763
				13	3.92027
				14	2.78945
				15	1.5223
				16	4.78538
				17	0.923789
				18	2.77421
				19	1.33728
				20	2.11417
				21	3.10357
				22	0.529327
				23	5.48215
				24	0.458104
				25	2.44485
				26	0.934286
				27	3.61161
				28	1.2514
			Embryo 5	1	2.3433
				2	0.669805
				3	1.23347
				4	2.67339
				5	1.69624
				6	1.9788
				7	0.76997
				8	1.91115
				9	0.769241
				10	1.55831
				11	1.12354
				12	0.795193
				13	1.15794
				14	1.05967
				15	2.21878
				16	1.86274
				17	1.44838
				18	0.492512
			Embryo 6	1	1.96626
				2	1.06696
				3	2.2147
				4	1.23901
				5	1.29674
				6	1.22385
				7	1.77293
				8	2.1001
				9	2.53896
				10	1.79166
				11	1.84087
			Embryo 6	1	1.88898
				2	3.80626
				3	1.63967
				4	2.04091
				5	2.17534
				6	2.34359
				7	2.5378
				8	4.30839
				9	2.28439
				10	2.90142
				11	2.9714
				12	3.79313
				13	4.53788
				14	4.42241
				15	1.43496

## Sheet: Circularity
Figure 1D : Quantifications showing Apc null clusters of broader size and shape than Apc heterozygous (het) placodes, which were analogous to wild-type in this assay (Circularity =1 perfect circle)
APC HET		Placode			Cluster
		Cir			Cir
Embryo 1	1	0.941	Embryo 1	1	0.682
	2	0.94		2	0.761
	3	0.97		3	0.762
	4	0.962		4	0.741
	5	0.975		5	0.836
	6	0.961		6	0.446
	7	0.959		7	0.739
	8	0.868		8	0.76
Embryo 2	1	0.951		9	0.788
	2	0.959		10	0.812
	3	0.941		11	0.61
	4	0.892		12	0.896
	5	0.953		13	0.851
	6	0.92		14	0.823
	7	0.962		15	0.708
	8	0.956		16	0.593
	9	0.954		17	0.858
	10	0.957		18	0.759
	11	0.973	Embryo 2	1	0.74
Embryo 3	1	0.951		2	0.797
	2	0.953		3	0.743
	3	0.828		4	0.933
	4	0.952		5	0.605
	5	0.953		6	0.854
	6	0.959		7	0.869
	7	0.952		8	0.817
	8	0.942		9	0.909
	9	0.949		10	0.914
	10	0.929	Embryo 3	1	0.901
	11	0.94		2	0.829
	12	0.948		3	0.901
	13	0.933		4	0.846
	14	0.911		5	0.94
	15	0.906		6	0.697
	16	0.948		7	0.829
	17	0.956		8	0.626
	18	0.967		9	0.778
	19	0.869		10	0.801
	20	0.904		11	0.625
	21	0.961		12	0.91
	22	0.958		13	0.938
	23	0.932		14	0.863
	24	0.791		15	0.95
	25	0.942		16	0.821
	26	0.951		17	0.773
	27	0.97		18	0.499
	28	0.941		19	0.861
	29	0.953		20	0.753
	30	0.93		21	0.84
	31	0.947		22	0.727
Embryo 4	1	0.961		23	0.833
	2	0.93		24	0.852
	3	0.959		25	0.903
	4	0.905		26	0.764
	5	0.873		27	0.909
	6	0.948		28	0.603
	7	0.892		29	0.729
	8	0.958		30	0.867
	9	0.762		31	0.848
	10	0.941	Embryo 3	2	0.849
	11	0.953		3	0.754
	12	0.949		4	0.894
	13	0.935		5	0.745
	14	0.912		6	0.837
Embryo 5	16	0.933		7	0.903
	17	0.962		8	0.68
	18	0.83		9	0.888
	1	0.937		10	0.906
	2	0.931		11	0.549
	3	0.948		12	0.805
	4	0.854		13	0.792
	5	0.869		14	0.829
	6	0.924		15	0.688
	7	0.938		16	0.456
	8	0.898		17	0.674
	9	0.854		18	0.457
	10	0.971		19	0.667
	11	0.943		20	0.94
	12	0.95		21	0.768
	13	0.937		22	0.808
	14	0.921	Embryo 3	1	0.892
	15	0.91		2	0.715
	16	0.979		3	0.947
	17	0.957		4	0.852
Embryo 5	1	0.916		5	0.531
	2	0.951		6	0.901
	3	0.827		7	0.561
	4	0.958		8	0.696
	5	0.943		9	0.797
	6	0.96		10	0.753
	7	0.956		11	0.903
	8	0.924		12	0.584
	9	0.965		13	0.945
	10	0.952		14	0.921
	11	0.958		15	0.783
	12	0.971	Embryo 4	1	0.925
	13	0.943		2	0.756
	14	0.796		3	0.46
	15	0.946		4	0.876
	16	0.888		5	0.614
	17	0.976		6	0.596
	18	0.814		7	0.681
	19	0.969		8	0.935
	20	0.892		9	0.856
	21	0.893		10	0.626
Embryo 5	1	0.945		11	0.727
	2	0.955		12	0.842
	3	0.951		13	0.629
	4	0.867		14	0.863
	5	0.943		15	0.782
	6	0.932		16	0.782
	7	0.946		17	0.804
	8	0.96	Embryo 4	1	0.881
	9	0.903		2	0.644
	10	0.963		3	0.789
	11	0.949		4	0.86
	12	0.901		5	0.88
	13	0.933		6	0.485
	14	0.932		7	0.488
	15	0.834		8	0.771
	16	0.967		9	0.753
	17	0.665		10	0.822
	18	0.967		11	0.874
	19	0.963		12	0.883
	20	0.972		13	0.68
	21	0.924		14	0.727
	22	0.923		15	0.851
	23	0.953		16	0.866
	24	0.844	Embryo 4	1	0.708
	25	0.957		2	0.728
				3	0.704
				4	0.553
				5	0.777
				6	0.895
				7	0.644
				8	0.175
				9	0.918
				10	0.764
				11	0.587
				12	0.431
				13	0.716
				14	0.734
				15	0.52
				16	0.513
			Embryo 5	1	0.512
				2	0.852
				3	0.955
				4	0.588
				5	0.902
				6	0.849
				7	0.66
				8	0.855
				9	0.682
				10	0.77
				11	0.559
				12	0.954
				13	0.726
				14	0.856
				15	0.64
				16	0.784
				17	0.505
				18	0.968
				19	0.589
				20	0.475
				21	0.86
				22	0.533
				23	0.806
				24	0.441
				25	0.838
				26	0.918
				27	0.865
				28	0.804
			Embryo 5	1	0.691
				2	0.877
				3	0.459
				4	0.518
				5	0.844
				6	0.675
				7	0.586
				8	0.666
				9	0.776
				10	0.809
				11	0.911
				12	0.655
				13	0.68
				14	0.752
				15	0.447
				16	0.903
				17	0.873
				18	0.617
			Embryo 6	1	0.909
				2	0.86
				3	0.661
				4	0.889
				5	0.546
				6	0.776
				7	0.815
				8	0.909
				9	0.561
				10	0.786
				11	0.836
			Embryo 6	1	0.85
				2	0.864
				3	0.764
				4	0.546
				5	0.776
				6	0.646
				7	0.811
				8	0.387
				9	0.9
				10	0.617
				11	0.771
				12	0.747
				13	0.765
				14	0.877
				15	0.887
