# Supplementary material for: Progenitors oppositely polarize WNT activators and inhibitors to orchestrate tissue development
Source: eLife. 2020 Apr 20;9:e54304. doi: 10.7554/eLife.54304 (PMC7224699; doi:10.7554/eLife.54304)
Supplement: Figure 2—source data 1. [file elife-54304-fig2-data1.xlsx]

## Sheet: FIG 2D
Figure 2 D: Examples of differentially regulated transcripts upon APC depletion. Represented FPKMs
		APC het tdTOM+	APC het tdTOM+ GFP +	APC null tdTOM+	APC null tdTOM+ GFP +
	Axin 2	30.611	34.2741	186.2	482.106
	Wnt10B	77.2866	83.7313	223.909	433.077
	Shh	6.93528	10.4993	139.517	230.689
	Notum	0.413339	0.520803	534.437	1534.94
	Wif1	9.70006	10.4432	340.054	891.842
	Dkk4	57.0004	83.1451	902.162	1796.82
	APCdd1	80.8938	76.7598	570.439	1673.33
More information available at GSE108745
