# Supplementary material for: Progenitors oppositely polarize WNT activators and inhibitors to orchestrate tissue development
Source: eLife. 2020 Apr 20;9:e54304. doi: 10.7554/eLife.54304 (PMC7224699; doi:10.7554/eLife.54304)
Supplement: Figure 3—figure supplement 3—source data 1. [file elife-54304-fig3-figsupp3-data1.xlsx]

## Sheet: A
Figure 3 - figure supplement 3A
		APC het tdTOM+	APC het tdTOM+ GFP +	APC null tdTOM+	APC null tdTOM+ GFP +
	Bmp4	3.14787	4.24859	156.499	514.772
More information available at GSE108745

## Sheet: B
Figure 3 - figure supplement 3B
			Lhx2 GFP + mko2+	mKO2+	Lin- Alfa6+
		Bmp4	76.0666	4.77552	3.42236
More information available at GSE108745
