# Supplementary material for: Progenitors oppositely polarize WNT activators and inhibitors to orchestrate tissue development
Source: eLife. 2020 Apr 20;9:e54304. doi: 10.7554/eLife.54304 (PMC7224699; doi:10.7554/eLife.54304)
Supplement: Figure 3—source data 1. [file elife-54304-fig3-data1.xlsx]

## Sheet: FIG 3 B
Fig 3 B: Represented FPKMs of WNT target transcripts
		Lhx2 GFP + mko2+	mKO2+	Lin- Alfa6+
	Axin 2	57.9128	37.5365	39.0059
	Wnt10B	299.036	95.1322	110.648
	Shh	222.56	10.1148	6.83497
	Notum	85.6085	5.15886	1.5588
	Wif1	42.5289	2.05817	1.01344
	Dkk4	66.5314	22.836	17.0273
	APCdd1	131.634	172.89	129.473
More information available at GSE108745
