# Supplementary material for: Progenitors oppositely polarize WNT activators and inhibitors to orchestrate tissue development
Source: eLife. 2020 Apr 20;9:e54304. doi: 10.7554/eLife.54304 (PMC7224699; doi:10.7554/eLife.54304)
Supplement: Figure 4—figure supplement 1—source data 1. [file elife-54304-fig4-figsupp1-data1.xlsx]

## Sheet: TG_IFE
Figure 4 - figure supplement 1B - Trans-Golgi Pixel intensity profile (Normalized Pixel Intensity measured from basal to apical side of interfolliclular epideris cells )
	Cell 1		Cell 2		Cell 3		Cell 4		Cell 5		Cell 6		Cell 7		Cell 8		Cell 9		Cell 10		Cell 11		Cell 12		Cell 13		Cell 14		Cell 15		Cell 16		Cell 17		Cell 18		Cell 19		Cell 20		Cell 21		Cell 22		Cell 23		Cell 24		Cell 25
	Normalized Pixel Intensity	Normalized Pixel Intensity	Normalized Pixel Intensity	Normalized Pixel Intensity	Normalized Pixel Intensity	Normalized Pixel Intensity	Normalized Pixel Intensity	Normalized Pixel Intensity	Normalized Pixel Intensity	Normalized Pixel Intensity	Normalized Pixel Intensity	Normalized Pixel Intensity	Normalized Pixel Intensity	Normalized Pixel Intensity	Normalized Pixel Intensity	Normalized Pixel Intensity	Normalized Pixel Intensity	Normalized Pixel Intensity	Normalized Pixel Intensity	Normalized Pixel Intensity	Normalized Pixel Intensity	Normalized Pixel Intensity	Normalized Pixel Intensity	Normalized Pixel Intensity	Normalized Pixel Intensity	Normalized Pixel Intensity	Normalized Pixel Intensity	Normalized Pixel Intensity	Normalized Pixel Intensity	Normalized Pixel Intensity	Normalized Pixel Intensity	Normalized Pixel Intensity	Normalized Pixel Intensity	Normalized Pixel Intensity	Normalized Pixel Intensity	Normalized Pixel Intensity	Normalized Pixel Intensity	Normalized Pixel Intensity	Normalized Pixel Intensity	Normalized Pixel Intensity	Normalized Pixel Intensity	Normalized Pixel Intensity	Normalized Pixel Intensity	Normalized Pixel Intensity	Normalized Pixel Intensity	Normalized Pixel Intensity	Normalized Pixel Intensity	Normalized Pixel Intensity	Normalized Pixel Intensity
(basal to apical distance um)	MYC - Tag	DAPI	MYC - Tag	DAPI	MYC - Tag	DAPI	MYC - Tag	DAPI	MYC - Tag	DAPI	MYC - Tag	DAPI	MYC - Tag	DAPI	MYC - Tag	DAPI	MYC - Tag	DAPI	MYC - Tag	DAPI	MYC - Tag	DAPI	MYC - Tag	DAPI	MYC - Tag	DAPI	MYC - Tag	DAPI	MYC - Tag	DAPI	MYC - Tag	DAPI	MYC - Tag	DAPI	MYC - Tag	DAPI	MYC - Tag	DAPI	MYC - Tag	DAPI	MYC - Tag	DAPI	MYC - Tag	DAPI	MYC - Tag	DAPI	MYC - Tag	DAPI	MYC - Tag
0	0.530262	1.57615	0.090047	0.63864	0.73247	0.107015	0.272186	0.216452	1.27254	0	0.00126858	0.620169	0.994716	0	0.18162	0.764171	0.643972	0.505153	0.715696	0.121653	0.58717	0.121653	0.546111	0.664868	0.358846	0.296135	0.662961	0	0.355719	0.300908	0.776241	0.528756	0.434245	0.808618	0.860804	0.819214	1.27099	0.175582	0.576849	0.456266	0.469353	0.0478985	0.103651	0.505766	0.278118	0.780343	0.655324	0.396416	0.445193
0.137	0.512029	1.41274	0.333694	0.716268	0.598771	0.198689	0.236064	0.172087	1.38983	0.297659	0.284316	0.431158	1.01426	0.145408	0.634868	0.784085	0.694226	0.426517	0.904618	0.0627944	0.563747	0.0627944	0.559843	0.722329	0.493198	0.486617	0.764165	0.131464	0.379397	0.1319	1.07101	0.346426	0.508064	0.637011	0.858929	0.62151	1.39477	0.0867085	0.487851	0.399581	0.606282	0.164487	0.0407985	0.353441	0.242141	0.668471	0.342701	0.238712	0.563964
0.274	0.527555	1.55282	0.323868	0.7968	0.606537	0.245954	0.608578	0.224919	1.36017	0.430396	0.623617	0.336804	1.0782	0.194578	0.689915	0.782017	0.691819	0.344871	1.24374	0.00431329	0.502667	0.00431329	0.601255	0.814696	0.573549	0.513066	0.804477	0.194895	0.462056	0.102198	1.08929	0.138976	0.623803	0.480611	0.844978	0.584267	1.17545	0.00557329	0.321131	0.356491	0.59151	0.112289	0.0973125	0.368564	0.223657	0.566725	0.342106	0.220227	0.453936
0.411	0.679835	1.69375	0.310282	0.32854	0.679157	0.189637	0.928163	0.144318	1.22611	0.668108	0.724143	0.402657	1.21403	0.0696218	0.861502	0.897067	0.688207	0.268947	1.64677	0	0.543386	0	0.878596	0.692517	0.592722	0.486043	0.832045	0.212217	0.513343	0.100079	0.84594	2.32298e-05	0.665476	0.502051	0.844972	0.557502	1.08057	0	0.367839	0.140728	0.53112	0	0.210594	0.422765	0.310209	0.517927	0.418687	0.191358	0.187256
0.548	0.985898	1.55187	0.325579	0.141852	0.665536	0.0809157	1.00885	0.0794919	1.47127	0.334098	0.808702	0.318406	1.54809	0.0689021	0.926441	0.906123	0.750197	0.209752	1.79412	0.0127972	0.615801	0.0127972	1.08753	0.446248	0.584007	0.458435	0.860848	0.230494	0.540823	0.082707	1.01602	0.0413567	0.641606	0.635563	0.864784	0.544533	0.873238	0.0548311	0.468025	0	0.537036	0.00310539	0.342122	0.461111	0.429821	0.487542	0.319245	0.178176	0
0.685	1.49301	1.68522	0.340961	0.326296	0.605335	0	1.03461	0.00524122	1.59318	0.591627	0.939968	0.184018	1.91781	0.0974955	0.843214	0.719611	0.83265	0.160421	1.8383	0.031393	0.751002	0.031393	1.04448	0.271943	0.636819	0.385745	0.769919	0.249366	0.525136	0.0984047	1.34041	0.161486	0.587018	0.83218	0.903505	0.577172	0.621303	0.0493679	0.62825	0.128201	0.627134	0.163349	0.460223	0.401514	0.655426	0.429992	0.348077	0.0849634	0.120039
0.822	1.44546	1.36288	0.274896	0.290618	0.645613	0.123254	1.17278	0.00794583	1.7456	0.542457	0.957882	0.285607	1.81856	0.315316	0.896831	0.601293	0.946398	0.110384	1.81229	0.0605706	0.983048	0.0605706	1.13405	0.329497	0.860637	0.28833	0.649385	0.327464	0.478657	0.0940231	1.4975	0.249573	0.734485	0.815548	0.880686	0.594515	0.277528	0.012148	0.741701	0.220022	0.697212	0.22185	0.498237	0.283944	0.832417	0.390862	0.595149	0.134279	0.188349
0.959	1.46562	0.981512	0.308681	0	0.878326	0.226057	1.35899	0	1.84064	0.654252	0.965173	0.550643	1.23147	0.271378	1.24354	0.485876	0.87207	0.203751	1.74734	0.108596	1.15174	0.108596	1.24678	0.388267	0.972853	0.184998	0.532337	0.420254	0.516668	0.0860656	1.44058	0.219343	0.890323	0.787032	0.844079	0.659966	0.41335	0.110538	0.584488	0.196022	0.723563	0.146665	0.460983	0.136663	0.921886	0.337456	0.981925	0.323934	0.256472
1.096	1.65996	0.959295	0.979624	0.102059	0.789096	0.174433	1.4299	0.0429041	1.97389	0.735575	1.30692	0.471062	0.999112	0.309452	1.06578	0.584324	0.710476	0.338007	1.66974	0.180268	1.23651	0.180268	1.63606	0.330536	0.894983	0.215196	0.548999	0.510454	0.667989	0.0932626	1.42733	0.281715	0.966161	0.836268	0.815941	0.676465	0.612614	0.296826	0.321934	0.195283	0.655771	0.25836	0.591498	0.111993	1.00551	0.26472	0.906609	0.346423	0.405114
1.233	1.3727	1.17756	1.62212	0.333079	0.499264	0.190897	1.19093	0.255862	2.58427	0.431377	1.76642	0.289933	0.898015	0.601801	0.793367	0.639742	0.523904	0.462547	1.61829	0.266022	1.21285	0.266022	1.84468	0.240312	0.845052	0.259714	0.587675	0.583066	0.860581	0.209565	1.60586	0.373093	1.11782	0.844141	0.761083	0.7036	0.917282	0.538313	0.379357	0.149453	0.658056	0.476455	0.815276	0.158267	0.960781	0.227888	0.536889	0.27423	0.504212
1.37	0.832485	1.36824	1.00298	0.264191	0.460712	0.515843	1.05878	0.551151	2.70644	0.498458	1.69666	0.2956	0.79594	0.715236	0.556518	0.693443	0.438744	0.599236	1.55501	0.343175	1.21016	0.343175	1.60371	0.2001	0.891702	0.320708	0.637244	0.643343	1.09716	0.459985	1.79386	0.393071	1.37566	0.751206	0.713359	0.694363	1.05088	0.550781	0.658605	0.201839	0.761417	0.72352	1.07149	0.221642	0.824633	0.226048	0.604272	0.356099	0.565418
1.507	0.763249	1.75207	0.762191	0.18854	0.370172	0.760048	0.996354	0.82907	2.40366	0.479341	1.36601	0.355944	0.690855	0.683889	0.38142	0.756889	0.347565	0.757947	1.53339	0.435785	1.22902	0.435785	1.45601	0.508024	1.03882	0.489078	0.668098	0.699009	1.27023	0.527121	1.73177	0.413714	1.67274	0.68709	0.719249	0.723735	0.914776	0.448731	0.760395	0.410147	0.57899	0.631799	1.18452	0.242347	0.715722	0.220059	0.774326	0.522914	0.59402
1.644	0.863728	2.18659	1.32688	0.300231	0.189662	0.746455	0.889693	1.02686	1.94355	0.472859	1.3826	0.197009	0.608431	0.562193	0.282236	0.736811	0.247357	0.949828	1.64677	0.558529	1.02109	0.558529	1.49114	0.937692	1.11789	0.69286	0.704924	0.724161	1.36225	0.294807	1.39495	0.392769	1.53302	0.791592	0.765342	0.695508	0.565865	0.384484	0.647076	0.566028	0.444335	0.514475	1.26587	0.240548	0.581524	0.161593	0.569042	0.476956	0.519514
1.781	0.589612	2.02502	1.59645	0.390489	0.0336212	0.821911	0.921603	0.878291	1.57538	0.249953	1.42522	0.18258	0.481995	0.464992	0.109615	1.00772	0.24465	0.932952	1.89679	0.608106	0.803208	0.608106	1.19781	0.757235	1.43817	0.898518	0.751406	0.726101	1.5341	0.205238	1.18549	0.370027	1.20834	0.926699	0.806481	0.646274	0.392033	0.503033	0.54234	0.607358	0.549009	0.533472	1.37104	0.233707	0.459963	0.109568	0.362976	0.45662	0.566871
1.918	0.25227	1.92301	1.80416	0.394529	0	1.151	1.01913	0.803234	1.17751	0.545368	1.27057	0.447657	0.388201	0.516578	0	1.1437	0.275042	0.793402	1.98376	0.510151	0.693283	0.510151	1.0972	0.652583	1.64267	0.918181	0.803659	0.718941	1.76434	0.223615	1.01941	0.301197	0.900995	1.05457	0.837534	0.707815	0.389577	0.599692	0.407975	0.85093	0.663403	0.547484	1.38397	0.184195	0.394812	0.0722777	0.62877	0.574253	0.659772
2.055	0.0727535	2.11974	1.71736	0.438748	0.0524195	1.48442	1.1359	0.964788	1.06927	0.676199	1.18692	0.481695	0.458561	0.538976	0.295127	0.955932	0.350273	0.593802	1.77479	0.459029	0.660313	0.459029	1.13655	0.821145	1.49636	0.872796	0.835748	0.692433	1.99666	0.232586	0.963883	0.307647	0.726671	1.11811	0.876172	0.732684	0.594974	0.584949	0.616183	0.745956	0.568701	0.464009	1.29451	0.17231	0.345217	0.0276228	0.863109	0.775349	0.744389
2.192	0.0863716	1.92107	1.6471	0.289159	0.14695	1.63987	1.24875	1.01008	0.90508	0.718485	1.06438	0.513263	0.30003	0.490187	0.394294	0.880349	0.377657	0.557057	1.35261	0.524836	0.595331	0.524836	0.998739	0.854056	1.00929	0.827411	0.872573	0.673316	2.21793	0.217803	0.875328	0.421194	0.521638	1.04727	0.894348	0.721694	0.597804	0.50458	0.926654	0.415964	0.432504	0.464281	1.12142	0.210483	0.379257	0.0124302	0.466734	0.945842	0.641924
2.329	0.247118	1.66493	1.38793	0.228844	0.295903	1.67402	1.02983	1.06573	0.167473	0.430477	0.874642	0.582335	0	0.313082	0.173613	0.871222	0.35238	0.548902	1.00679	0.692215	0.44941	0.692215	0.883724	0.653511	0.699074	0.888405	0.811064	0.655109	2.00397	0.348083	0.829775	0.420304	0.345448	0.82971	0.908585	0.823056	0.340833	0.468036	1.25757	0.459745	0.277446	0.525808	0.775743	0.176274	0.349103	0	0.305926	1.01809	0.304661
2.466	0.394879	1.47958	0.948181	0.328104	0.509233	1.54729	0.717864	1.30186	0.502603	0.72446	0.626346	0.621757	0.240245	0.411447	0.211251	0.847014	0.305436	0.510587	0.805786	0.65546	0.350159	0.65546	0.805972	0.504294	0.643463	0.989429	0.714797	0.606394	1.59604	0.52083	0.788611	0.348927	0.348144	0.576174	0.920909	0.88889	0	0.477012	1.36331	0.62943	0.173286	0.507559	0.41182	0.089303	0.278118	0.0483398	0.448961	0.766276	0.18507
2.603	0.396978	1.54474	0.712758	0.48902	0.646892	1.48755	0.646146	1.8732	0.403154	0.838539	0.49754	0.653828	0.165325	0.476613	0.307478	0.76392	0.194396	0.47856	0.746198	0.456831	0.297243	0.456831	0.649023	0.626009	0.463045	1.09609	0.635608	0.566545	1.29817	0.63791	0.724818	0.286392	0.419661	0.380679	0.923671	0.8953	0.122782	0.429961	1.2573	0.452047	0.123491	0.69306	0.131275	0	0.299508	0.101746	0.41227	0.716431	0.261937
2.74	0.259401	1.63064	0.628655	0.773927	0.608556	1.59533	0.448494	2.51468	0.522538	1.15553	0.723015	0.687886	0.133476	0.471582	0.316784	0.853369	0.0896755	0.456965	0.760844	0.665882	0.268253	0.665882	0.538702	0.721197	0.443186	1.12355	0.548798	0.573205	1.00101	0.577826	0.44612	0.240266	0.476508	0.265384	0.923671	0.807405	0.455026	0.3844	0.976516	0.26426	0.165763	1.04679	0.197672	0.0361942	0.390927	0.220523	0.404932	0.865234	0.266681
2.877	0.105439	1.36198	0.27816	0.714054	0.468817	1.67402	0.0797369	2.83916	0.684364	1.32555	0.848771	0.760782	0.22064	0.447269	0.283571	1.0486	0	0.455682	0.591346	0.798579	0.362645	0.798579	0.513519	0.740877	0.44459	1.10823	0.456851	0.598578	0.661789	0.393347	0.201398	0.155415	0.503699	0.247943	0.867187	0.743377	0.722805	0.3407	0.694389	0.194054	0.181421	0.973733	0.320584	0.119195	0.394812	0.407436	0.397742	0.640639	0.172501
3.014	0	1.22679	0	0.556149	0.344594	1.67402	0.0417518	2.7659	0.652078	1.14534	0.535816	0.735864	0.155265	0.58476	0.237619	1.09536	0.00902758	0.497007	0.221333	0.804411	0.514065	0.804411	0.480483	0.767636	0.31031	1.09595	0.36367	0.550553	0.330804	0.178043	0.0731377	0	0.550566	0.295045	0.795103	0.818222	0.552513	0.392878	0.66155	0.264751	0.17497	0.846492	0.424994	0.229023	0.299508	0.520689	0.284377	0.255764	0.0863433
3.151	0.337688	1.2709	0.166689	0.478054	0.453809	1.61753	0.222444	1.88328	0.415795	1.20438	0.367504	0.587569	0.0970441	0.807062	0.231563	1.0818	0.0309963	0.531458	0.223762	0.743765	0.607844	0.743765	0.35845	0.871017	0.40442	1.11936	0.307098	0.52241	0.300489	0.207338	0.222354	0.174502	0.629641	0.290597	0.769184	0.846928	0.271183	0.544117	0.637427	0.215522	0.146617	0.813149	0.456932	0.335614	0.171144	0.492608	0.197146	0.251218	0.108017
3.288	0.587453	1.29508	0.13612	0.474307	0.652393	1.54025	0.353483	1.04866	0.259822	1.23777	0.560009	0.585045	0.170095	0.652517	0.254104	0.952033	0.0279859	0.539613	0.315717	0.716543	0.515993	0.716543	0.451954	0.862592	0.452854	1.15419	0.256912	0.546257	0.306753	0.299568	0.288779	0.341989	0.661154	0.295797	0.801962	0.807127	0.0749857	0.666787	0.66477	0.0964964	0.0911479	0.779386	0.515471	0.396297	0.0680679	0.476492	0.270816	0.373157	0.0714026
3.425	0.561827	1.13625	0.368558	0.758323	0.611915	1.47519	0.57615	1.79468	0.166182	1.26557	0.72873	0.791153	0.31176	0.751959	0.304199	0.89696	0.0433335	0.549617	0.376765	0.7152	0.35126	0.7152	0.291464	0.730225	0.428852	1.19581	0.195002	0.580246	0.226955	0.360702	0.24025	0.389726	0.59936	0.339114	0.852767	0.807472	0.0653242	0.574699	0.378159	0.119267	0.0937612	0.800932	0.633572	0.403319	0.0340281	0.565808	0.196467	0.550497	0.202011
3.562	0.558524	0.888469	0.321867	0.829605	0.543363	1.38502	0.698807	2.06346	0	1.10809	0.63556	0.953733	0.362574	1.00486	0.27985	0.839337	0.0490514	0.564915	0.368556	0.812752	0.266307	0.812752	0.164141	0.812572	0.351864	1.1195	0.165783	0.594308	0.128545	0.44188	0.24344	0.359667	0.486205	0.384992	0.892119	0.675689	0.251523	0.552626	0	0.137618	0.152511	0.874676	0.697935	0.529895	0	0.615529	0.0309991	0.871072	0.261577
3.699	0.592808	0.817412	0.234003	0.854142	0.668972	1.29969	0.333275	1.7248	0.417613	1.42821	0.711572	0.809056	0.317067	0.96854	0.206876	0.898583	0.0550686	0.57321	0.385787	0.877066	0.189652	0.877066	0.0467794	1.12825	0.207516	1.00417	0.135344	0.578916	0.0636216	0.608434	0.319128	0.398747	0.341733	0.350008	0.895833	0.542703	0.507858	0.704106	0.448518	0.3354	0.125208	0.877305	0.700982	0.704004	0.0359769	0.540025	0.14017	0.663129	0.295458
3.836	0.50045	0.942952	0.496587	0.869865	0.889467	1.31811	0.0218854	1.64218	0.383768	1.58843	0.906511	0.660946	0.226354	0.910296	0.257331	0.858719	0.136319	0.647415	0.505376	0.864151	0.135078	0.864151	0.0763614	1.32461	0.103173	0.883202	0.103672	0.562989	0.0529235	0.738162	0.359	0.429503	0.225899	0.359947	0.908635	0.688609	0.451522	0.751902	0.835249	0.686612	0.0874084	0.794888	0.643455	0.871631	0.0952927	0.465443	0.269319	0.445443	0.434995
3.973	0.416225	0.977937	0.514444	1.05387	1.06133	1.37026	0.152954	1.80846	0.594048	1.8405	0.841723	0.90678	0.195064	0.781184	0.197541	0.675124	0.249765	0.777676	0.47959	0.982271	0.217202	0.982271	0.166813	1.19829	0.162957	0.889565	0.173805	0.57067	0.0683391	0.728222	0.448835	0.366589	0.134252	0.426715	0.919173	0.78498	0.290231	0.629677	0.518953	0.698366	0.175243	0.723575	0.490632	0.73335	0.155589	0.359096	0.0827014	0.472909	0.357297
4.11	0.381154	0.87317	0.506825	1.15607	1.2321	1.30521	0.479662	2.08374	0.711603	2.00567	0.96311	1.06891	0.0543006	0.772905	0.047183	0.622945	0.407449	0.949392	0.408346	1.12471	0.351898	1.12471	0.0811306	1.16038	0.168607	0.946504	0.258764	0.601778	0.0846054	0.745142	0.56628	0.299192	0.0927339	0.546154	0.918871	0.816229	0.260524	0.461099	0.182546	0.615183	0.266172	0.807817	0.357585	0.550061	0.178928	0.272084	0	0.528745	0.248461
4.247	0.364161	0.633216	0.742721	1.15607	1.30522	1.21856	0.739829	2.12567	0.323952	1.96888	1.28473	1.01801	0.217137	0.817056	0.0104617	0.828278	0.486289	0.922948	0.456014	1.1268	0.332458	1.1268	0.0700279	1.10814	0.0604092	1.0036	0.345573	0.609689	0.0915657	0.878708	0.609129	0.381774	0.056034	0.690695	0.923671	0.865919	0.329488	0.477138	0.191657	0.628248	0.161871	0.931154	0.277253	0.418621	0.341331	0.320424	0.217607	0.417669	0.276965
4.384	0.426098	0.433852	0.823597	1.02434	1.42286	1.12269	0.819816	1.95022	0.407361	1.97297	1.44803	0.807735	0.741713	0.994042	0.085275	1.05062	0.512169	0.780825	0.519146	0.923765	0.160302	0.923765	0.191181	1.04669	0.0273851	1.07037	0.271522	0.562289	0.0923132	0.999065	0.646273	0.425871	0.00355187	0.76593	0.898581	0.905107	0.348475	0.608128	0.249025	0.507543	0.102902	1.02727	0.270662	0.503607	0.616532	0.412038	0.207907	0.496087	0.334444
4.521	0.583673	0.550742	0.732337	0.973607	1.89289	0.957213	0.825526	1.69149	0.184547	1.61854	1.51362	0.691166	0.575441	0.766747	0.14185	1.31494	0.555501	0.644842	0.517892	0.744797	0	0.744797	0.206227	1.1546	0.17119	1.13338	0.123003	0.488126	0.0887042	0.989931	0.681365	0.473446	0	0.75863	0.821982	0.899756	0.304094	0.735051	0.22188	0.749604	0.142386	1.0135	0.283836	0.627839	0.899516	0.462681	0.0811761	0.557257	0.370599
4.658	0.59592	0.745804	0.523275	0.913298	2.19114	0.826139	0.763007	1.53235	0.0307901	1.26348	1.67827	0.578841	0.410055	0.601864	0.15389	1.03281	0.652397	0.530603	0.533807	0.756344	0.0505476	0.756344	0.171104	1.2766	0.0993082	1.17688	0	0.459313	0.0444939	0.914177	0.461383	0.601736	0.0469618	0.736236	0.725064	0.820014	0.23705	0.657732	0.201042	1.06178	0.187566	0.921096	0.299045	0.728307	1.14944	0.489381	0.231642	0.475412	0.328979
4.795	0.881115	0.876169	0.244666	0.528607	1.6028	0.505012	0.534426	1.3629	0.20743	1.83909	1.61479	0.476598	0.20315	0.563439	0.100436	0.936981	0.776979	0.444239	0.535312	0.82779	0.225102	0.82779	0.173418	1.2199	0.0522685	1.08164	0.0201482	0.456648	0	0.889589	0.278236	0.693927	0.0779359	0.775173	0.671202	0.690554	0.197793	0.59499	0.232331	0.903685	0.223441	0.868508	0.265336	0.734789	1.21751	0.550151	0.284972	0.572611	0.218405
4.932	1.21223	0.915874	0.178626	0.384024	1.11118	0.269124	0.531315	1.06766	0.398356	1.81915	1.41262	0.424136	0.400667	0.628254	0.0818185	0.888931	0.916607	0.369606	0.431044	0.686115	0.443878	0.686115	0.228954	1.00579	0.142483	0.933063	0.105724	0.447397	0.0142556	0.880428	0.172781	0.700711	0.0831567	0.861908	0.656983	0.64578	0.149984	0.676612	0.355168	0.6219	0.231358	0.839316	0.217945	0.751897	0.779904	0.680901	0.337316	0.530148	0.342455
5.069	1.18064	0.723941	0.165428	0.453479	0.868034	0.24325	0.574235	0.652431	0.575157	1.60624	1.32467	0.44708	0.679483	0.641866	0.0821784	0.849908	0.991836	0.34358	0.195752	0.580061	0.607746	0.580061	0.188595	0.73608	0.245892	0.80429	0.197872	0.395212	0.0832392	0.851133	0.175414	0.668251	0.144018	0.861167	0.579016	0.761725	0.158361	0.712443	0.240848	0.569595	0.157727	0.762387	0.178666	0.812214	0.382174	0.802899	0.397649	0.364305	0.600753
5.206	0.859853	0.503951	0.381187	0.792418	0.885707	0.300945	0.492053	0.505391	0.614887	1.1496	1.20206	0.408895	0.805657	0.569803	0.0621641	0.856939	1.02614	0.335722	0	0.559082	0.568811	0.559082	0.140262	0.712856	0.26896	0.808052	0.232429	0.299176	0.16332	0.830483	0.0853767	0.743299	0.233217	0.856809	0.550924	0.796717	0.257993	0.648353	0.137245	0.487721	0.0240335	0.760222	0.1926	0.787005	0.443439	0.667089	0.246635	0.349757	0.807321
5.343	0.586857	0.505441	0.126537	0.79513	1.12152	0.329428	0.58789	0.779296	0.676187	0.985254	1.12249	0.418139	0.719566	0.51649	0.100557	0.778318	1.08121	0.339437	0.222666	0.671161	0.518957	0.671161	0.101087	0.954996	0.239207	0.852851	0.245805	0.206147	0.19905	0.821774	0	0.874578	0.281719	0.878429	0.599445	0.812512	0.301314	0.692021	0.348607	0.630578	0	0.936177	0.242784	0.721285	0.534846	0.501353	0.30268	0.329224	1.06818
5.48	0.60887	0.395274	0.43694	0.813109	1.4008	0.356417	0.792438	0.841098	0.680103	0.978144	1.17022	0.474515	0.743778	0.458289	0.368292	0.759288	1.03096	0.296971	0.402814	0.695773	0.52028	0.695773	0.163337	0.804741	0.220732	0.906041	0.245388	0.232239	0.240476	0.831868	0.0152276	0.889189	0.346672	0.875082	0.670414	0.880785	0.384316	0.711022	0.533966	0.788676	0.125667	1.12994	0.301071	0.652868	0.425935	0.38626	0.305954	0.25334	1.39242
5.617	0.455302	0.560073	0.76799	0.944095	1.44587	0.553436	0.840442	0.608435	0.708225	0.589616	1.12726	0.502933	1.04624	0.38649	0.234494	0.782914	0.95061	0.224335	0.446254	0.631032	0.603231	0.631032	0.259286	0.680121	0.344093	0.952715	0.296607	0.305722	0.299148	0.812884	0.0494186	0.783525	0.473392	0.785516	0.721879	0.819272	0.557537	0.594072	0.510909	0.726625	0.354259	1.16864	0.383183	0.743616	0.28687	0.302011	0.177707	0.309502	1.54115
5.754	0.367786	0.680473	0.915719	1.03714	1.48503	0.765645	0.896977	0.371656	1.01226	0.577529	1.07999	0.460195	1.16233	0.342051	0.226294	0.682994	0.869964	0.146981	0.439363	0.756621	0.746076	0.756621	0.120903	0.487881	0.446877	0.976855	0.353796	0.369794	0.334645	0.711338	0.121809	0.716383	0.616554	0.826396	0.740211	0.671918	0.722905	0.463433	0.47285	0.552104	0.607802	1.10332	0.452365	0.836703	0.161423	0.366001	0.334349	0.167958	1.70318
5.891	0.57306	0.465726	1.22373	0.856499	1.36194	0.80595	0.933069	0.368616	1.4275	0.966572	1.01194	0.339074	1.11751	0.257472	0.518414	0.791876	0.876282	0.137116	0.49701	0.866224	0.816506	0.866224	0.0238894	0.360116	0.443288	0.994773	0.429282	0.42538	0.339981	0.566538	0.223742	0.704427	0.663371	1.11449	0.738699	0.645541	0.898058	0.429794	0.260686	0.293217	0.810261	1.00755	0.514712	0.871272	0.0427802	0.485702	0.501314	0	1.75901
6.028	0.80575	0.434038	2.04149	0.775841	0.859328	0.767525	0.885796	0.481924	1.66384	0.715574	0.768889	0.251707	1.0407	0.418294	0.563045	0.928679	0.912393	0.162994	0.617319	0.960847	0.91397	0.960847	0.0625644	0.471087	0.48554	0.883776	0.419825	0.452358	0.352458	0.447963	0.322188	0.736717	0.679221	1.40461	0.697845	0.730911	1.15977	0.513183	0.0954272	0.252626	0.974373	0.943192	0.38293	0.888013	0.0486149	0.548312	0.364148	0.171139	1.63797
6.165	1.15841	0.269845	2.155	0.810378	0.443439	0.764763	0.799213	0.359964	1.69681	0.766489	0.709586	0.247182	1.13295	0.446136	0.464233	0.706262	0.96355	0.211758	0.534669	0.761295	1.09508	0.761295	0.11433	0.50293	0.747333	0.73405	0.366755	0.436656	0.417536	0.448678	0.324714	0.68174	0.662189	1.53698	0.648489	0.674999	1.44194	0.498052	0.284611	0.434026	1.27723	0.801687	0.192346	0.972999	0.225605	0.574553	0.442209	0.22492	1.62695
6.302	1.47622	0.0964602	2.22816	0.559204	0.452191	0.61643	0.422786	0.0993816	1.78488	1.0252	0.64781	0.184437	1.20802	0.411585	0.515149	0.699123	0.987323	0.166431	0.466871	0.52873	1.21635	0.52873	0.312388	0.366667	1.13658	0.595305	0.312034	0.403502	0.473437	0.535767	0.275093	0.524737	0.57531	1.46374	0.656309	0.550014	1.52845	0.424849	0.474191	0.627301	1.48022	0.704943	0	1.13595	0.303406	0.594348	0.611341	0.0489222	1.65036
6.439	1.60542	0.0229162	2.40297	0.545682	0.567261	0.457033	0	0.0369573	1.90307	1.32923	0.417492	0.143103	1.32827	0.224905	0.617088	0.673012	0.979499	0.0723479	0.503088	0.349863	1.30441	0.349863	0.254201	0.358966	1.28981	0.567989	0.499014	0.356162	0.507491	0.638327	0.199833	0.507756	0.450292	1.46272	0.705879	0.497526	1.02894	0.485385	0.478136	0.395692	1.4632	0.668124	0.131528	1.13847	0.133218	0.563046	0.813342	0.164643	1.53441
6.576	1.61858	0	2.07436	0.648951	0.64418	0.395548	0.228689	0.356655	1.73886	1.32835	0.100064	0	1.15004	0.204384	0.355013	0.689989	0.964453	0	0.580631	0.326652	1.34177	0.326652	0.144608	0.462569	1.15629	0.585766	0.754908	0.300892	0.498249	0.61488	0.220492	0.634901	0.351798	1.55269	0.750055	0.455138	0.781684	0.411517	0.489467	0.168744	1.25801	0.639303	0.317799	1.07941	0.00972065	0.537263	1.04663	0.3666	1.4682
6.713	1.55766	0.0251696	1.04685	0.525727	0.678279	0.418135	0.444482	0.687289	1.37882	1.1001	0	0.0645396	0.842849	0.225906	0.199186	0.682032	0.910588	0.0491826	0.674246	0.301603	1.10619	0.301603	0.0441286	0.595659	0.942177	0.603543	1.01697	0.281975	0.485656	0.515887	0.276766	0.670884	0.386136	1.60736	0.791075	0.408505	0.883709	0.239908	0.403491	0.170713	1.17382	0.625236	0.425754	1.04466			1.21134	0.475578	1.27274
6.85	1.36014	0.17061	0.651243	0.291085	0.782856	0.501922	0.50434	0.568538	1.06101	1.08506	0.185738	0.317368	1.06253	0.288807	0.378475	0.73187	0.863945	0.125255	0.840109	0.220414	0.782928	0.220414	0	0.498477	0.880291	0.574352	1.4189	0.298176	0.497141	0.405713	0.265037	0.487848	0.492256	1.58582	0.847312	0.42498	0.76741	0.318129	0.17826	0.289818	1.14415	0.706576	0.558042	0.857588			1.39273	0.673113	1.02263
6.987	1.24723	0.450576	0.825926	0.205889	0.948188	0.609914	0.390773	0.0820621	0.893547	1.21831	0.400359	0.394858	0.984277	0.333458	0.37361	0.736732	0.824525	0.21161	0.88347	0.22795	0.4573	0.22795	0.259068	0.27571	0.887909	0.536772	1.84964	0.351132	0.515637	0.339166	0.1597	0.280832	0.622537	1.51915	0.908786	0.516028	0.600796	0.384106	0.583619	0.354651	1.1414	0.847748	0.714916	0.662954			1.72572	0.87921	0.894397
7.124	1.08196	0.522118	0.71271	0.265064					1.0796	1.20771	0.501013	0.303798	0.82743	0.408112	0.287991	0.609896	0.756516	0.308841	0.785281	0.34972	0.371745	0.34972	0.409445	0.296466	0.785597	0.502085	2.2818	0.343956	0.483542	0.234931	0.0827439	0.248473	0.681113	1.45607	0.923671	0.658686	0.486778	0.39423	0.696664	0.369274	1.04163	0.899995	0.872043	0.528809			1.94998	1.09565	0.924639
7.261	0.930615	0.611585	0.495738	0.390252					0.460883	0.567838			1.03772	0.218415	0.410681	0.642499	0.688508	0.393626	0.680012	0.490917	0.359421	0.490917	0.579354	0.413941	0.678661	0.418545	2.2059	0.240025	0.446782	0.126378	0.186372	0.343088	0.663533	1.39591	0.923671	0.713013	0.58793	0.435786	1.00975	0.605517	0.948295	0.860071	1.04818	0.680774			1.96672	0.96592	0.872352
7.398	0.907325	0.786031	0.630159	0.419721					0.413299	0.710957			0.817469	0.16243	0.642051	0.73304	0.653	0.453825	0.72204	0.626173		0.626173	0.521461	0.436608	0.662892	0.31131	1.95701		0.535138	0.186353	0.298303	0.410819	0.668557	1.26986	0.915117	0.69547	0.738637	0.386345	1.55095	0.820622	0.87053	0.782504	1.2755	0.879013			1.96672	0.703107	0.693293
7.535	0.977086	0.606426	0.627187	0.333808					0.948973	0.862497			0.408633	0.275358	0.468444	0.485768	0.54226	0.450537	0.777497	0.743547		0.743547	0.503318	0.25411	0.54557	0.210861	1.72848		0.673956	0.362585	0.405204	0.429201	0.68713	1.07659	0.874378	0.760221	0.861021	0.214847	1.58948	0.82783	0.688311	0.851385	1.56365	1.02809			1.96672	0.925456	0.540367
7.672	0.828383	0.263196	0.496223	0.3001					1.08284	1.08993					0.404623	0.349138	0.387286	0.448679	0.569854	0.849239		0.849239	0.599441	0.0920146	0.416703	0.201755	1.46005		0.804886	0.463072	0.579338	0.549105	0.758381	0.826486	0.875941	0.886265	0.585337	0.372519	1.4062	1.04441	0.702996	0.880119	1.52715	1.07239			1.87852	0.832804	0.545012
7.809			0.514625	0.601235					0.64075	1.09821					0.914085	0.348887	0.209141	0.454113	0.320934	0.899329		0.899329	0.663494	0.0311664	0.382233	0.221126	1.16836		0.927205	0.369185	0.797992	0.626042	0.908116	0.562079	0.915295	0.737101	0.420693	0.525714	1.2575	0.999812	1.00279	0.830297	1.34925	1.09255			1.22851	1.02519	0.570336
7.946									0.582322	1.16955					1.25118	0.399184	0.159189	0.42308	0.537349	0.839681		0.839681	0.640256	0	0.325238	0.244246	0.866803		1.06499	0.229535	0.944919	0.604075	1.0169	0.517212	0.838546	0.665173	0.50615	0.535933	1.01083	0.913351	0.936661	0.724633	1.21645	1.14171			0.701371	1.15304	0.652493
8.083									0.468403	0.718726					1.38414	0.662621	0.164304	0.370897	0.744129	0.792159		0.792159	0.692837	0.0502708	0.293054	0.309142	0.759645		1.18017	0.12626	0.949106	0.414543	1.00954	0.499726	0.770334	0.75155	0.482788	0.494932	0.982616	0.851668	0.662659	0.662006	1.04843	1.12245			0.548413	1.15304	0.51724
8.22									0.279596	0.41666					1.07823	0.389576	0.194998	0.333716	0.847518	0.777852		0.777852	0.815445	0.156092	0.192393	0.400194	0.715414		1.20103	0.17147	1.23334	0.271308	0.942231	0.475142	0.730067	0.766631	0.37458	0.474186	0.896365	0.708563	0.435292	0.657125	0.801586	1.09814			0.514391	1.15304	0.314038
8.357									0.745384	0.635336					0.965317	0.25948	0.166711	0.356881	0.790153	0.815077		0.815077	0.94568	0.247336		0.485902	0.679422		1.16516	0.229698	1.72376	0.318968	0.830848	0.555869	0.727543	0.744795	0.302149	0.371974	0.928127	0.770776	0.300659	0.663144	0.491392	1.10696			0.510336	1.15304
8.494										0					0.952229	0.231107			0.82305	0.937729		0.937729	0.919716			0.379957	0.618731		1.1123	0.219686	1.63801	0.539248	0.735401	0.718772	0.710888	0.745758	0.341369	0.455448	0.911916	0.784089	0.217734	0.64959	0.375579	1.0425			0.51374	1.15016
8.631															0.790377	0.225075			0.943672	1.12865		1.12865	0.739323			0.199447	0.537074		0.984138	0.135368	1.39107	0.663272	0.655496	0.037904	0.507777	0.773338	0.450961	0.582024	0.684608	0.692019	0.136459	0.677019	0.421703	0.93033			0.589987	1.13008
8.768															0.660673	0.269879							0.692772			0	0.438338		0.926613	0.0557385	0.959483	0.674647	0.639774	0.124707	0.42073	0.82205	0.722468	0.579292	0.524844	0.748865	0.0634405	0.708098	0.564381	0.79889			0.651873	1.12708
8.905															0.610829	0.388585							0.726004			0.0945204	0.417157		0.982178	0	0.728507	0.706022	0.691768	0.165857	0.343354	0.842837			0.257872	0.482804	0.0565629	0.786797	0.566406	0.780163			0.447584	1.14992
9.042															0.771694	0.622758							0.727688			0.273155	0.407484		0.899635	0.054625	0.4967	0.772119	0.796125	0.137712	0.270815	0.604254			0.0412789	0.37943	0.105308	0.829208	0.478724	0.767559			0.269403	1.12784
9.179															0.582843	0.226992							0.591663			0.467832	0.382383		0.715963	0.18476	0.466981	0.526998	0.723128	0.0683732	0.188603	0.479029			0.274555	0.784619	0.211304	0.872542	0.432599	0.721106			0.367004	1.15304
9.316															0.576274	0							0.518061			0.446446	0.284882		0.559718	0.322164	0.44523	0.352481	0.511273	0	0.101555	0.685332			0.506623	0.908595	0.221025	0.84077	0.383436	0.630004
9.453															0.801485	0.343788							0.421427			0.354668	0.140281		0.513343	0.364948	0.458714	0.414117			0.00967195	0.868923			0.457771	0.73887	0.212573	0.76668	0.318811	0.56086
9.59															0.830179	0.475011							0.185184			0.267226	0.0119254		0.502915	0.381062	0.578353	0.521911			0.0580317	0.884287			0.433439	0.698078	0.24554	0.686379	0.24481	0.519989
9.727															0.5659	0.3848							0.131332			0.198579	0.0890623		0.484612	0.40049	0.723858	0.478595			0.149915	0.78084			0.240376	0.523106	0.350858	0.762003	0.219971	0.481457
9.864															0.394405	0.342345							0.267107			0.130507	0.227292				0.734994	0.38899			0.241799	0.647457			0.0637976	0.436934	0.473136	0.77818	0.180185	0.427801
10.001															0.442038	0.462559							0.185173			0.068072	0.364703				0.636026	0.299734			0.236963	0.741403			0.112989	0.49337	0.583145	0.61488	0.103904	0.356686
10.138																							0.25494			0.0950949	0.406666				0.558406	0.173379			0.193439	0.915029			0.192195	0.556362	0.556827	0.419061	0.122405	0.359204
10.275																							0.498897			0.166061	0.416123				0.399203	0.16497			0.154751	0.153303			0.320252	0.497306
10.412																							0.563515								0.3569	0.157297			0.0822116	0.0814423			0.365356	0.496406
10.549																							0.546111								0.503472	0.0951337			0	0			0.272874	0.550102
10.686																																							0.348475	0.596832
10.823																																							0.37795	0.552312
10.96																																							0.354102	0.506395
11.097																																							0.384522	0.506032
11.234																																							0.422988	0.550304
11.371
11.508
11.645
11.782
11.919
12.056
12.193
12.33
12.467
12.604
12.741
12.878
13.015
13.152
13.289
13.426
13.563
13.7
13.837
13.974
14.111
14.248
14.385
14.522
14.659
14.796
14.933
15.07
15.207
15.344
15.481
15.618
15.755
15.892
16.029
16.166
16.303
16.44
16.577
16.714
16.851
16.988
17.125
17.262
17.399
17.536
17.673
17.81
17.947
18.084
18.221
18.358
18.495
18.632
18.769
18.906
19.043
19.18
19.317
19.454
19.591
19.728
19.865
20.002
20.139
20.276
20.413
20.55
20.687
20.824
20.961
21.098
21.235
21.372
21.509
21.646
21.783
21.92
22.057
22.194
22.331
22.468
22.605
22.742
22.879
23.016
23.153
23.29
23.427
23.564
23.701
23.838
23.975
24.112
24.249
24.386
24.523
24.66
24.797
24.934
25.071
25.208
25.345
25.482
25.619
25.756
25.893
26.03
26.167
26.304
26.441
26.578
26.715
26.852
26.989
27.126
27.263
27.4
27.537
27.674
27.811
27.948
28.085
28.222
28.359
28.496
28.633
28.77
28.907
29.044
29.181
29.318
29.455
29.592
29.729
29.866
30.003
30.14
30.277
30.414
30.551
30.688
30.825
30.962
31.099
31.236
31.373
31.51
31.647
31.784
31.921
32.058
32.195
32.332
32.469
32.606
32.743
32.88
33.017
33.154
33.291
33.428
33.565
33.702
33.839
33.976
34.113
34.25
34.387
34.524
34.661
34.798
34.935
35.072
35.209
35.346
35.483
35.62
35.757
35.894
36.031
36.168
36.305
36.442
36.579
36.716
36.853
36.99
37.127
37.264
37.401
37.538
37.675
37.812
37.949
38.086
38.223
38.36
38.497
38.634
38.771
38.908
39.045
39.182
39.319
39.456
39.593
39.73
[truncated: 13 more columns]

## Sheet: TG_HF
Figure 4 - figure supplement 1B - Trans-Golgi Pixel intensity profile (Normalized Pixel Intensity measured from basal to apical side of bud progenitor cells )
	Cell 1		Cell 2		Cell 3		Cell 4		Cell 5		Cell 6		Cell 7		Cell 8		Cell 9		Cell 10		Cell 11		Cell 12		Cell 13		Cell 14		Cell 15		Cell 16		Cell 17		Cell 18		Cell 19		Cell 20		Cell 21
	Normalized Pixel Intensity	Normalized Pixel Intensity	Normalized Pixel Intensity	Normalized Pixel Intensity	Normalized Pixel Intensity	Normalized Pixel Intensity	Normalized Pixel Intensity	Normalized Pixel Intensity	Normalized Pixel Intensity	Normalized Pixel Intensity	Normalized Pixel Intensity	Normalized Pixel Intensity	Normalized Pixel Intensity	Normalized Pixel Intensity	Normalized Pixel Intensity	Normalized Pixel Intensity	Normalized Pixel Intensity	Normalized Pixel Intensity	Normalized Pixel Intensity	Normalized Pixel Intensity	Normalized Pixel Intensity	Normalized Pixel Intensity	Normalized Pixel Intensity	Normalized Pixel Intensity	Normalized Pixel Intensity	Normalized Pixel Intensity	Normalized Pixel Intensity	Normalized Pixel Intensity	Normalized Pixel Intensity	Normalized Pixel Intensity	Normalized Pixel Intensity	Normalized Pixel Intensity	Normalized Pixel Intensity	Normalized Pixel Intensity	Normalized Pixel Intensity	Normalized Pixel Intensity	Normalized Pixel Intensity	Normalized Pixel Intensity	Normalized Pixel Intensity	Normalized Pixel Intensity	Normalized Pixel Intensity	Normalized Pixel Intensity
(basal to apical distance um)	MYC - Tag	DAPI	MYC - Tag	DAPI	MYC - Tag	DAPI	MYC - Tag	DAPI	MYC - Tag	DAPI	MYC - Tag	DAPI	MYC - Tag	DAPI	MYC - Tag	DAPI	MYC - Tag	DAPI	MYC - Tag	DAPI	MYC - Tag	DAPI	MYC - Tag	DAPI	MYC - Tag	DAPI	MYC - Tag	DAPI	MYC - Tag	DAPI	MYC - Tag	DAPI	MYC - Tag	DAPI	MYC - Tag	DAPI	MYC - Tag	DAPI	MYC - Tag	DAPI	MYC - Tag	DAPI
0	0.0822224	0.172673	0.132583	0.0939242	0.275179	0.112836	0.241408	0.0705136	0.0295891	0.315357	0.0199205	0.0707928	0.157309	0.0874431	0.212556	0	0.0670802	0.101341	0.260122	0.0437237	0.207675	0.101617	0.264696	0.0613694	0.0988746	0.0472005	0.142223	0.0050361	0.0799029	0.0510678	0.074395	0.123648	0.125611	0.144931	0.227673	0.203867	0.320637	0.247169	0.173526	0.110675	0.0227868	0.331473
0.137	0.0965915	0.128972	0.114288	0.0729745	0.248066	0.0489237	0.254982	0.0524507	0.0740911	0.33401	0.090671	0.0492537	0.131303	0.0715191	0.183821	0.00570852	0.063577	0.0723497	0.272092	0.0586024	0.190138	0.0339048	0.18007	0.0402182	0.11315	0.0539845	0.173818	0	0.0990786	0.0510678	0.0700289	0.0736951	0.112222	0.197122	0.123448	0.228222	0.332132	0.258004	0.141113	0.0776943	0.0733164	0.412848
0.274	0.110789	0.103116	0.110617	0.0560954	0.223524	0.0228041	0.300062	0.0793596	0.144645	0.274266	0.11143	0.0352775	0.114479	0.0690827	0.170155	0.0215006	0.0791765	0.0656775	0.277553	0.0647262	0.186688	0.0242457	0.101929	0.0504304	0.132139	0.0578138	0.183158	0.00305539	0.131337	0.038605	0.0733	0.0477015	0.0846701	0.146862	0.221842	0.313104	0.24874	0.323874	0.135748	0.00728584	0.0541032	0.352152
0.411	0.12552	0.0847579	0.10133	0.0401651	0.257234	0.0107626	0.360776	0.0732248	0.235327	0.20954	0.19265	0.0620029	0.0766928	0.0853403	0.18768	0.0339504	0.102901	0.0656602	0.286865	0.0825635	0.179109	0.019779	0.0630261	0.0548819	0.158183	0.0601456	0.190948	0.0230971	0.208354	0.0323729	0.101865	0.0339626	0.144006	0.162913	0.214615	0.249482	0.257006	0.328658	0.208778	0.0249112	0.0974542	0.39098
0.548	0.127116	0.0707236	0.120565	0.043598	0.310836	0.0148782	0.408664	0.0299619	0.344048	0.174205	0.199256	0.0588358	0.0712956	0.080063	0.23814	0.039029	0.124394	0.0511604	0.272248	0.0803105	0.156341	0.0114086	0.0769427	0.0455301	0.196748	0.0712828	0.187236	0.0436373	0.310235	0.032626	0.146881	0.00901666	0.120949	0.14414	0.113474	0.163413	0.231782	0.19577	0.242875	0.0907972	0.0575337	0.38716
0.685	0.151143	0.0398218	0.150622	0.0732704	0.319848	0.0100995	0.432773	0.0160063	0.335979	0.175005	0.203634	0.0504417	0.0745049	0.064715	0.308567	0.0506504	0.133869	0.0346323	0.261381	0.0410927	0.173025	0.0409259	0.103226	0.0314489	0.261835	0.0789209	0.186685	0.0649534	0.392171	0.0448327	0.167348	0	0.0927589	0.0820615	0.171618	0.188096	0.297244	0.309812	0.26116	0.0634478	0.0543647	0.323026
0.822	0.199708	0.0101318	0.166292	0.0730409	0.304737	0	0.434506	0.0241688	0.290885	0.178954	0.252859	0.057252	0.0722299	0.0456497	0.376746	0.0836474	0.150691	0.0213309	0.311519	0.0127114	0.185248	0.0342305	0.167258	0.0208252	0.33841	0.0967091	0.235226	0.067048	0.442304	0.0444544	0.167982	0.011089	0.106612	0.0841901	0.189567	0.155956	0.20393	0.0931546	0.293527	0.0893865	0.105791	0.28598
0.959	0.292836	0	0.201622	0.0315699	0.315513	0.00429451	0.454118	0.0367514	0.279843	0.148911	0.33499	0.0638245	0.0858333	0.0381022	0.45528	0.126013	0.189833	0.00830044	0.41307	0	0.197232	0.0402466	0.275475	0.0720519	0.420777	0.13233	0.315741	0.0460374	0.475679	0.0381606	0.185332	0.0273102	0.18316	0.120929	0.22884	0.112614	0.162927	0.201343	0.263889	0.0640225	0.0601174	0.30255
1.096	0.407961	0.0160084	0.251739	0.0112834	0.367323	0.00778906	0.503317	0.035755	0.257021	0.112754	0.400632	0.0444632	0.114369	0.029741	0.536499	0.167635	0.256065	0.00268561	0.490135	0.0398478	0.35585	0.0333419	0.365988	0.0582753	0.485386	0.178825	0.386152	0.041394	0.509579	0.0318657	0.188008	0.0263656	0.243852	0.0400421	0.267198	0.16016	0.156863	0.18514	0.294792	0.0343102	0.109856	0.302794
1.233	0.511886	0.0334674	0.310695	0.0240511	0.41879	0.0174886	0.541797	0.0500524	0.283979	0.101814	0.476162	0	0.166443	0.030466	0.652949	0.181351	0.320611	0	0.629669	0.0464404	0.452535	0.0415866	0.370209	0	0.51208	0.214219	0.453182	0.0454661	0.517769	0.0255701	0.172753	0.033064	0.218001	0.0355231	0.312763	0.194895	0.21537	0.130098	0.403116	0.112771	0.131398	0.236124
1.37	0.621101	0.0387694	0.403249	0.0348805	0.467147	0.0259986	0.592258	0.0578673	0.372182	0.106392	0.520458	0.0185691	0.233061	0.0477076	0.733997	0.206017	0.383913	0.00992984	0.6938	0.0210025	0.494319	0.0206072	0.440523	0.0366645	0.509407	0.236057	0.49212	0.0574855	0.505147	0.0199107	0.168428	0.0451845	0.217188	0.0440724	0.35624	0.179049	0.260368	0.16468	0.546714	0.0526612	0.131361	0.284121
1.507	0.704567	0.0352196	0.501712	0.0365179	0.543311	0.0248618	0.631701	0.0841216	0.459752	0.110504	0.664655	0.0338919	0.240774	0.0847708	0.747697	0.237437	0.443243	0.0114213	0.700047	0.0301858	0.465473	0.00979876	0.513151	0.10931	0.508655	0.257864	0.520205	0.0599372	0.488268	0.0261359	0.166118	0.0541714	0.218216	0.0211173	0.351726	0.123194	0.289875	0.0279271	0.599578	0.0610327	0.115466	0.142167
1.644	0.732844	0.0658141	0.582581	0.0328554	0.636248	0.0237882	0.641927	0.0977991	0.566106	0.100091	0.69859	0.0643788	0.214125	0.111043	0.703492	0.270434	0.473588	0.00915126	0.666026	0.0570651	0.526525	0.0381017	0.516889	0.111388	0.498111	0.257311	0.537488	0.0508482	0.499901	0.0385956	0.173358	0.069543	0.359474	0.0720873	0.316134	0.073692	0.357488	0	0.559234	0.0485452	0.136354	0.134238
1.781	0.737809	0.135047	0.669785	0.0223372	0.692928	0.0298247	0.641248	0.127106	0.686711	0.0802983	0.658708	0.0978353	0.176327	0.1266	0.662372	0.28512	0.479554	0.00348389	0.5476	0.0965349	0.609892	0.0629615	0.5122	0.102427	0.497065	0.244487	0.495451	0.0348351	0.509585	0.0518855	0.219903	0.0686282	0.55134	0.069761	0.45255	0.00937663	0.490412	0.11217	0.568321	0.0595929	0.181741	0.187828
1.918	0.732935	0.183425	0.736074	0.0167108	0.668259	0.026367	0.561318	0.12184	0.769825	0.0495025	0.521734	0.109753	0.140792	0.100025	0.670255	0.308924	0.484258	0.00350718	0.517385	0.134876	0.658731	0.0792928	0.559694	0.0437238	0.517202	0.250145	0.421893	0.0346285	0.457407	0.0715301	0.287257	0.0631147	0.565556	0.0473816	0.392496	0	0.518158	0.0700574	0.491133	0.0289866	0.283752	0.140125
2.055	0.697835	0.190951	0.747479	0.0140124	0.596848	0.0171149	0.413161	0.120131	0.838994	0.024627	0.360569	0.163085	0.130862	0.10606	0.667151	0.309299	0.476717	0.00927127	0.58929	0.227525	0.62743	0.0814051	0.647085	0.0741574	0.543788	0.252236	0.409136	0.0344705	0.354769	0.0903533	0.349627	0.0672427	0.441947	0	0.418521	0.0794753	0.497894	0.0924646	0.405624	0.0389894	0.237182	0.123805
2.192	0.600497	0.208479	0.712491	0.00143337	0.546544	0.0125625	0.29365	0.14645	0.913781	0.0134386	0.258256	0.212775	0.120126	0.105614	0.644612	0.316863	0.466615	0.0200203	0.581683	0.193901	0.622908	0.0888868	0.699718	0.132005	0.528014	0.231957	0.473453	0.0474313	0.258506	0.110192	0.40059	0.0716458	0.582029	0.0426301	0.526906	0.0733456	0.606046	0.118608	0.440754	0.0179795	0.24235	0.0687419
2.329	0.496793	0.214429	0.693222	5.10097e-05	0.533999	0.0134467	0.232819	0.180611	0.935426	0.00576526	0.217319	0.254942	0.12409	0.0935287	0.623471	0.29303	0.445799	0.02302	0.592182	0.125647	0.67436	0.0789438	0.697635	0.157971	0.43946	0.187816	0.556044	0.0730026	0.208213	0.135305	0.427274	0.0791428	0.451413	0.0485157	0.627772	0.0480457	0.614224	0.103551	0.480675	0.0149723	0.396111	0.0298374
2.466	0.393515	0.243499	0.720939	0.00169352	0.51769	0.0208936	0.199841	0.221511	0.842746	0	0.202724	0.266661	0.135517	0.0872539	0.580616	0.246618	0.40864	0.0226474	0.575364	0.218528	0.753797	0.0990997	0.619697	0.184872	0.33878	0.173277	0.613055	0.0824313	0.204115	0.164362	0.443843	0.0743137	0.589318	0.0401642	0.546782	0.0484156	0.522987	0.119082	0.440342	0.0326905	0.270391	0.0420691
2.603	0.30725	0.257824	0.744015	0.00163231	0.516855	0.0287143	0.192937	0.235646	0.725378	0.00437623	0.210276	0.284993	0.129754	0.0853556	0.565511	0.227927	0.35153	0.044263	0.429002	0.160707	0.649248	0.0688566	0.542386	0.205553	0.280186	0.203125	0.617323	0.0703119	0.211888	0.184528	0.444406	0.062549	0.629091	0.0706217	0.504958	0.0679615	0.593033	0.138004	0.423776	0.0537875	0.389867	0.0654503
2.74	0.247698	0.252869	0.716447	0	0.553549	0.0286301	0.176951	0.288531	0.631383	0.0102112	0.230016	0.301108	0.125105	0.060103	0.551651	0.221951	0.287462	0.0771131	0.322793	0.199415	0.654043	0.12208	0.433405	0.165143	0.254933	0.252852	0.576505	0.055707	0.203076	0.211674	0.419176	0.0481611	0.683314	0.126634	0.399327	0.081501	0.641512	0.161481	0.502787	0.064516	0.355954	0.0725414
2.877	0.222392	0.239232	0.702003	0.00797792	0.580887	0.0221304	0.14851	0.373157	0.564643	0.0250227	0.260412	0.291249	0.123504	0.0474385	0.514532	0.203311	0.248139	0.0937815	0.251769	0.228371	0.745537	0.127403	0.378701	0.256085	0.251961	0.297747	0.524768	0.0481824	0.184824	0.228662	0.388439	0.0406746	0.526704	0.185967	0.379995	0.0722359	0.5743	0.0712561	0.536338	0.110634	0.452281	0.0449136
3.014	0.216428	0.22038	0.739132	0.0110997	0.575928	0.00456292	0.127374	0.421587	0.526658	0.0604896	0.277667	0.294654	0.118803	0.05006	0.478893	0.191179	0.19739	0.145332	0.326119	0.235559	0.654149	0.175768	0.272287	0.303881	0.276283	0.289866	0.496682	0.0647655	0.175326	0.240686	0.402466	0.0370944	0.527228	0.128484	0.364292	0.0862216	0.62974	0.0890848	0.463871	0.138286	0.450239	0.163872
3.151	0.180849	0.192135	0.762478	0.0258415	0.544803	0.00507342	0.113073	0.435948	0.489383	0.0691872	0.236545	0.323637	0.107625	0.0731909	0.46924	0.189193	0.169915	0.19453	0.21524	0.286046	0.502267	0.197194	0.191744	0.288256	0.300457	0.26301	0.49648	0.101896	0.163679	0.230728	0.455405	0.0402784	0.497399	0.160517	0.290343	0.079035	0.398309	0.187689	0.450266	0.183673	0.396896	0.332733
3.288	0.154294	0.188221	0.715545	0.0296316	0.531531	0.0178938	0.113752	0.44856	0.447317	0.0695519	0.223632	0.293744	0.0872957	0.0954087	0.514514	0.212912	0.15859	0.254423	0.260445	0.242847	0.526637	0.196343	0.138512	0.297757	0.285519	0.265464	0.492928	0.131896	0.136083	0.196101	0.51158	0.0530802	0.361744	0.0627762	0.391053	0.0992385	0.31937	0.165843	0.35625	0.232381	0.355662	0.282501
3.425	0.16317	0.203182	0.659368	0.0430879	0.538986	0.0393769	0.103991	0.469739	0.392344	0.117107	0.22465	0.315282	0.0699898	0.0987942	0.561882	0.232954	0.123414	0.280097	0.200912	0.2157	0.490155	0.226512	0.200368	0.377141	0.23338	0.299968	0.461278	0.159967	0.110366	0.183419	0.545656	0.0677159	0.390982	0.133625	0.363951	0.115309	0.422969	0.154593	0.324087	0.359636	0.346765	0.261359
3.562	0.141874	0.215988	0.612349	0.079009	0.547309	0.0417189	0.110478	0.486244	0.371966	0.174671	0.216625	0.333178	0.0719165	0.0934193	0.599491	0.24398	0.0805811	0.24982	0.19729	0.0964795	0.428456	0.228954	0.197916	0.380513	0.178161	0.311058	0.413729	0.186268	0.0910556	0.186515	0.540865	0.0694765	0.421886	0.176551	0.239826	0.146973	0.434772	0.0653035	0.30867	0.372245	0.293975	0.214851
3.699	0.0923233	0.227821	0.519973	0.126616	0.572897	0.0321562	0.124004	0.477154	0.370817	0.197087	0.205569	0.294338	0.0731469	0.0742316	0.581572	0.236677	0.0579805	0.218215	0.27499	0.217691	0.414697	0.244736	0.197389	0.377681	0.147263	0.303092	0.371533	0.210313	0.0624716	0.186456	0.514504	0.0607952	0.502539	0.190992	0.32515	0.214271	0.291104	0.16327	0.388123	0.333831	0.25581	0.263935
3.836	0.0773709	0.227314	0.409786	0.174877	0.601028	0.0306668	0.145771	0.433486	0.33027	0.211076	0.159086	0.283053	0.0665367	0.060035	0.522527	0.240677	0.0528413	0.227601	0.202584	0.182249	0.479394	0.202219	0.156364	0.350379	0.126966	0.30222	0.335345	0.224496	0.046028	0.180169	0.502747	0.0521729	0.488074	0.268628	0.232229	0.193586	0.507113	0.270675	0.34315	0.349987	0.222925	0.29843
3.973	0.0890498	0.231092	0.320715	0.20057	0.588591	0.0394874	0.159933	0.431366	0.269595	0.224468	0.163829	0.278143	0.0728103	0.0636334	0.485809	0.247362	0.0600241	0.276198	0.203013	0.185998	0.313458	0.308489	0.14668	0.369809	0.0982559	0.309054	0.2922	0.232889	0.0440463	0.186319	0.50415	0.0608952	0.361489	0.354464	0.156675	0.241761	0.303773	0.253794	0.241505	0.301309	0.173691	0.268486
4.11	0.11541	0.263638	0.255522	0.206436	0.550813	0.0457344	0.126394	0.448936	0.22322	0.24385	0.169447	0.260248	0.0952407	0.0504107	0.491774	0.257264	0.0728474	0.314466	0.246597	0.268406	0.249069	0.370264	0.146427	0.421543	0.0708981	0.328189	0.240125	0.242248	0.058675	0.194392	0.489147	0.0867603	0.242683	0.348485	0.171876	0.256639	0.30968	0.17572	0.219648	0.213815	0.0723078	0.165117
4.247	0.137054	0.262915	0.226	0.21192	0.528312	0.0536445	0.0861333	0.438375	0.230872	0.255776	0.176815	0.280163	0.102431	0.0370401	0.555138	0.245818	0.0902647	0.318749	0.193495	0.269862	0.186471	0.354766	0.0860391	0.399617	0.057216	0.330424	0.194077	0.25492	0.0670635	0.196373	0.46339	0.124756	0.268945	0.26754	0.222069	0.227135	0.336134	0.252057	0.272303	0.268461	0.134897	0.175418
4.384	0.102384	0.211704	0.226642	0.223208	0.547797	0.0510868	0.0961985	0.42059	0.208286	0.269672	0.177036	0.298178	0.0930934	0.030864	0.583855	0.241029	0.0926774	0.309919	0.173578	0.309675	0.223661	0.426591	0.090645	0.380695	0.0592891	0.330811	0.166861	0.270408	0.0563598	0.190218	0.439464	0.16857	0.194117	0.535511	0.120467	0.319551	0.297489	0.193408	0.194599	0.311915	0.103811	0.226757
4.521	0.0698472	0.276102	0.227288	0.249744	0.574563	0.0400242	0.102097	0.384743	0.136472	0.29662	0.156313	0.280202	0.0987344	0.0337717	0.535997	0.242448	0.0722636	0.324047	0.115806	0.358116	0.245519	0.420584	0.166846	0.404544	0.0648257	0.356559	0.16228	0.293459	0.0500043	0.181955	0.413934	0.205698	0.1893	0.470269	0.113043	0.400935	0.202977	0.250636	0.192758	0.318272	0.0814536	0.300858
4.658	0.0903022	0.21861	0.218701	0.284318	0.576383	0.0395084	0.0759766	0.325346	0.135072	0.297667	0.1157	0.299682	0.0998138	0.0332927	0.44909	0.233879	0.0726932	0.354023	0.0879426	0.348484	0.160382	0.329124	0.0815761	0.39795	0.0553216	0.368737	0.168968	0.330011	0.0414361	0.181941	0.378493	0.232247	0.131812	0.466233	0.0806903	0.288098	0.229179	0.19901	0.121719	0.27368	0.0342052	0.247462
4.795	0.105612	0.231518	0.183549	0.307048	0.599686	0.0462818	0.0672697	0.340767	0.168331	0.28883	0.109861	0.28139	0.097504	0.0302981	0.346135	0.268641	0.0909863	0.381766	0.0358213	0.353792	0.158685	0.383189	0.142849	0.448904	0.0467487	0.346132	0.174749	0.370289	0.0327333	0.188161	0.334477	0.253165	0.146411	0.434967	0.162512	0.52114	0.182971	0.248022	0.134825	0.277675	0.0494711	0.293183
4.932	0.108411	0.274776	0.14132	0.286109	0.621986	0.0442082	0.0699384	0.385959	0.147945	0.2621	0.111651	0.26678	0.105281	0.0530156	0.242718	0.340531	0.0989458	0.402024	0.0637962	0.431869	0.158284	0.420849	0.126492	0.498645	0.0493257	0.322869	0.165722	0.41243	0.0303027	0.214705	0.286472	0.268304	0.153626	0.566503	0.103991	0.575574	0.203642	0.213833	0.205521	0.239957	0.0749226	0.245791
5.069	0.0947468	0.293072	0.110496	0.283951	0.602037	0.0230567	0.0490374	0.375711	0.134181	0.255147	0.138579	0.249082	0.102019	0.0884419	0.193851	0.33417	0.0939112	0.404832	0.0919884	0.503375	0.161543	0.421338	0.108992	0.536491	0.0693034	0.317716	0.145451	0.461048	0.0453867	0.248076	0.239109	0.277274	0.115312	0.558623	0.0255398	0.701656	0.190409	0.212266	0.139464	0.2438	0.0438429	0.215933
5.206	0.0736181	0.29764	0.0993081	0.275973	0.610243	0.0149466	0.0781316	0.358738	0.13384	0.262937	0.146095	0.255021	0.0843708	0.117586	0.174551	0.277295	0.0816993	0.393753	0.0610878	0.532804	0.12735	0.424236	0.0912771	0.553677	0.100705	0.304793	0.121983	0.498525	0.0581491	0.266736	0.209586	0.284706	0.110784	0.556907	0.0570244	0.656523	0.102257	0.200366	0.106947	0.251829	0.00350519	0.324565
5.343	0.0881817	0.274111	0.091888	0.349616	0.636295	0.0346034	0.111157	0.312051	0.133311	0.278463	0.128835	0.282934	0.0834945	0.15415	0.159287	0.283934	0.0746101	0.402235	0.0563232	0.53664	0.108747	0.409817	0.058772	0.560725	0.131125	0.288508	0.0951952	0.501869	0.0491641	0.264234	0.196071	0.298516	0.0898835	0.459509	0.0752064	0.616944	0.149281	0.191355	0.127897	0.231846	0.0548067	0.369138
5.48	0.083294	0.222422	0.0971805	0.377778	0.669278	0.0514341	0.0913792	0.296444	0.101529	0.30046	0.102602	0.282024	0.095467	0.195308	0.177159	0.306819	0.0591923	0.409452	0.0574489	0.635877	0.11252	0.448096	0.0330328	0.568153	0.131348	0.288324	0.0671707	0.486283	0.0222412	0.249126	0.179378	0.33291	0.143583	0.432646	0.049487	0.494231	0.231701	0.246789	0.208668	0.261779	0.0713863	0.358542
5.617	0.0415882	0.235762	0.0619952	0.417015	0.665712	0.0647703	0.077287	0.331203	0.0774747	0.289155	0.118144	0.288517	0.101299	0.20734	0.204513	0.308646	0.0504837	0.436482	0.0481703	0.689313	0.0683748	0.439549	0.0533911	0.57765	0.112499	0.288359	0.0391155	0.468607	0.00938261	0.241669	0.160398	0.381607	0.196341	0.495283	0.0879823	0.350652	0.138305	0.314495	0.180965	0.268299	0.0531257	0.269263
5.754	0.0116744	0.24706	0.0618505	0.394693	0.641362	0.0556813	0.08932	0.354375	0.0925756	0.279324	0.148539	0.291487	0.106314	0.172131	0.220521	0.297791	0.0575343	0.508818	0.0224301	0.612031	0.114161	0.444485	0.0575848	0.528523	0.108972	0.289704	0.0162782	0.433168	0.00661208	0.241591	0.140206	0.426065	0.1363	0.325268	0.0909278	0.336426	0.165154	0.321536	0.156559	0.370022	0.0238826	0.374705
5.891	0.00528556	0.259223	0.0657535	0.429808	0.620588	0.0511394	0.0811964	0.3749	0.130415	0.330945	0.169118	0.299405	0.110991	0.129897	0.211558	0.324325	0.0666726	0.517008	0.0513746	0.518954	0.100531	0.502515	0.0678629	0.44969	0.111281	0.293738	0.00391339	0.38621	0.00654153	0.238799	0.115281	0.459014	0.149179	0.329805	0.0859408	0.306534	0.124508	0.245175	0.162557	0.407188	0.126523	0.18924
6.028	0	0.265503	0.059168	0.450442	0.624364	0.0471554	0.0515407	0.415794	0.132427	0.392823	0.176527	0.263732	0.106076	0.123296	0.174244	0.337075	0.0597377	0.478792	0.072484	0.444954	0.0679171	0.598739	0.0588324	0.454125	0.0976053	0.298252	0	0.355549	0.0256723	0.230291	0.0881987	0.493014	0.184127	0.406399	0.0669326	0.235872	0.183385	0.222276	0.132189	0.392698	0.0544767	0.286986
6.165	0.00647922	0.272888	0.0229551	0.510245	0.696841	0.0394821	0.0440962	0.454915	0.134975	0.408326	0.179408	0.214754	0.0936331	0.14352	0.120639	0.316085	0.0403209	0.466305	0.0170246	0.419995	0.0444967	0.623994	0.0395459	0.362044	0.0665224	0.297641	0.00328872	0.35086	0.0384475	0.217519	0.0661268	0.522943	0.066981	0.316614	0.0839771	0.273408	0.145863	0.235187	0.0753472	0.382991	0.0473792	0.305516
6.302	0.00422755	0.284561	0.0159885	0.578685	0.791964	0.0435398	0.0697033	0.465128	0.134564	0.454368	0.207832	0.221525	0.0899827	0.173222	0.0900813	0.312448	0.0320033	0.442996	0.0186072	0.372133	0.0240065	0.573232	0	0.318556	0.0378315	0.297605	0.00856781	0.357809	0.032015	0.219328	0.0579019	0.525947	0.0304471	0.269029	0.115384	0.383473	0.0817929	0.248391	0.0855727	0.411351	0.0665861	0.245323
6.439	0.00673243	0.288088	0.0477725	0.599002	0.846162	0.058718	0.0628466	0.497928	0.115321	0.51613	0.273726	0.264326	0.0961808	0.198132	0.0644382	0.352186	0.0241154	0.428491	0.0446038	0.446496	0.0437655	0.565876	0.0137627	0.353339	0.0200926	0.300963	0.0234681	0.349483	0.0222091	0.225296	0.0477543	0.505636	0.0785229	0.303889	0.165925	0.387959	0.0634989	0.242958	0.106424	0.444163	0.0909793	0.231705
6.576	0.0140572	0.309495	0.0567606	0.594656	0.847935	0.0730488	0.0365125	0.517515	0.106173	0.517961	0.258112	0.268325	0.0965465	0.203968	0.0459581	0.398382	0.0126471	0.435833	0.0743063	0.499201	0.0549008	0.64053	0.015681	0.348984	0.0158699	0.319214	0.0348898	0.336743	0.0220552	0.213131	0.0392664	0.474131	0.0948819	0.26237	0.20087	0.357921	0.0858506	0.274031	0.0638965	0.516395	0.113654	0.191891
6.713	0.0335627	0.323376	0.0325125	0.58851	0.837121	0.091611	0.0307572	0.511971	0.123286	0.457999	0.18481	0.263811	0.0940916	0.201527	0.0439992	0.405424	0.016547	0.422075	0.089085	0.504579	0.0634295	0.619797	0.0385126	0.348604	0.0216872	0.348964	0.0343509	0.341068	0.0253837	0.206884	0.0305202	0.435769	0.0599806	0.388225	0.150718	0.395304	0.215131	0.337078	0.0715322	0.623145	0.104633	0.214043
6.85	0.0540222	0.30276	0.0134122	0.579211	0.83896	0.105379	0.0379187	0.539007	0.126439	0.420414	0.169339	0.295366	0.101033	0.197899	0.054319	0.405265	0.0112149	0.407059	0.0619739	0.508057	0.041583	0.670955	0.0592611	0.381737	0.0345847	0.37134	0.0329668	0.347215	0.0349844	0.231859	0.0157979	0.404581	0.0337928	0.259311	0.145372	0.399032	0.181604	0.390301	0.122294	0.702993	0.142922	0.201832
6.987	0.0675368	0.297662	0.00285612	0.561505	0.874575	0.112978	0.032442	0.521813	0.103645	0.372409	0.165723	0.285073	0.0995062	0.214988	0.0482593	0.400629	0.011942	0.376453	0.0329903	0.485396	0.126351	0.7285	0.0199186	0.393114	0.0386479	0.36783	0.0396116	0.32917	0.0316815	0.282028	0.00551112	0.382695	0.0891915	0.290332	0.122957	0.349061	0.207129	0.245064	0.023006	0.70596	0.0768402	0.186497
7.124	0.0716196	0.324337	0	0.546916	0.875771	0.131361	0.0327685	0.475596	0.0725246	0.314116	0.159631	0.29794	0.0816315	0.252167	0.0308944	0.39155	0	0.3817	0.0437679	0.475276	0.15667	0.64503	0.000285808	0.395348	0.0320971	0.358551	0.0516457	0.302338	0.0319958	0.310194	0.00854105	0.37481	0.0908442	0.332416	0.240215	0.395304	0.170541	0.313431	0.0291552	0.797924	0.0318954	0.17971
7.261	0.0694313	0.345722	0.0125052	0.529772	0.845965	0.168749	0.0237351	0.420776	0.0834621	0.285547	0.155726	0.338959	0.063693	0.282572	0.0195598	0.36143	0.00110166	0.388303	0.0495691	0.408695	0.140701	0.617787	0.00820598	0.449396	0.0259417	0.362633	0.0594051	0.304408	0.0389798	0.291309	0.00681062	0.390638	0.132692	0.306349	0.145779	0.376938	0.109939	0.285194	0.0379814	0.70416	0.104788	0.204108
7.398	0.083303	0.371731	0.0218648	0.50518	0.77484	0.17657	0.0124988	0.395112	0.130108	0.288728	0.146347	0.369882	0.0584293	0.302076	0.0517169	0.33409	0.0218294	0.455259	0.0668834	0.351498	0.117437	0.556631	0.0980101	0.455039	0.0277405	0.382464	0.058805	0.327999	0.0484651	0.268618	0	0.390941	0.0999004	0.369283	0.094023	0.415643	0.131357	0.294942	0.0309495	0.601874	0.0997952	0.175007
7.535	0.0906368	0.403179	0.0186372	0.502002	0.703001	0.182459	0.00412273	0.336932	0.127519	0.306791	0.147263	0.388451	0.0575936	0.312416	0.0577471	0.327247	0.0119255	0.498243	0.111805	0.35669	0.121752	0.46238	0.133928	0.483335	0.0329518	0.422394	0.0510945	0.342671	0.060631	0.271914	0.00376177	0.374107	0.158591	0.295439	0.0830252	0.449292	0.158675	0.265582	0.00845449	0.610309	0.0665239	0.158915
7.672	0.0746219	0.397615	0.021006	0.54103	0.657455	0.21662	0.0166651	0.356183	0.0881894	0.316847	0.137956	0.344265	0.04388	0.31762	0.0502477	0.315779	0.00692395	0.523724	0.133622	0.371201	0.118291	0.527058	0.103248	0.458491	0.0386224	0.441752	0.0384664	0.331811	0.0634016	0.275411	0.0150709	0.374021	0.239082	0.242462	0.0698362	0.452104	0.154229	0.305186	0.0412912	0.641496	0.141204	0.210955
7.809	0.0774794	0.360774	0.0360392	0.573809	0.608671	0.284443	0.0243663	0.411652	0.0928471	0.319943	0.132884	0.305146	0.0188613	0.305463	0.0544665	0.334312	0.0193287	0.531276	0.060068	0.384577	0.0961434	0.621012	0.031274	0.516446	0.0518644	0.426413	0.0281899	0.309857	0.0596306	0.282649	0.024259	0.39009	0.16795	0.312008	0.138074	0.413359	0.138669	0.329476	0.0758408	0.616899	0.0692259	0.225467
7.946	0.0711449	0.331295	0.0505948	0.606368	0.644928	0.406331	0.0348756	0.419722	0.13148	0.333793	0.0913655	0.311164	0.00950027	0.263167	0.0811068	0.324767	0.0279988	0.536088	0	0.41188	0.0759826	0.651283	0.0147686	0.571007	0.0614578	0.41716	0.040028	0.310599	0.0632669	0.291547	0.032095	0.386372	0.107277	0.307431	0.148407	0.584839	0.138494	0.239579	0.156269	0.572696	0.0608645	0.221708
8.083	0.0364519	0.331909	0.0621158	0.6317	0.563406	0.525635	0.0499473	0.398136	0.142543	0.331899	0.0176208	0.331634	0.0332364	0.238589	0.0821747	0.311063	0.0276242	0.510827	0.0255675	0.414501	0.0735099	0.589643	0.0954818	0.590144	0.0415502	0.423178	0.0515661	0.31414	0.0581235	0.280416	0.0578256	0.348756	0.145625	0.320691	0.168146	0.360528	0.11135	0.20091	0.12464	0.478845	0.127171	0.311363
8.22	0.0248724	0.351194	0.0485251	0.652782	0.425312	0.607547	0.0498559	0.385959	0.122269	0.310888	0	0.317856	0.05262	0.252446	0.0639012	0.300089	0.0342176	0.508617	0.0047535	0.40189	0.0831326	0.54539	0.162822	0.606694	0.015449	0.423461	0.0608505	0.293875	0.0517807	0.264026	0.0716055	0.325985	0.102138	0.26319	0.158537	0.330965	0.147681	0.258279	0.0779834	0.37653	0.0719093	0.352741
8.357	0.0342951	0.362737	0.0205235	0.683842	0.355411	0.623878	0.0646228	0.399695	0.110113	0.336447	0.0543645	0.299564	0.0425278	0.273391	0.0680315	0.334374	0.0304169	0.479321	0.00281978	0.43886	0.0786506	0.660519	0.200643	0.604797	0.0100718	0.40729	0.0668032	0.263723	0.0350613	0.240456	0.0678755	0.328944	0.118624	0.302104	0.182305	0.385757	0.0544178	0.331032	0.0970641	0.378724	0.0801898	0.239279
8.494	0.0555776	0.359995	0.0314173	0.69236	0.287204	0.651297	0.0164779	0.418099	0.115927	0.394593	0.0899404	0.314134	0.0285066	0.294451	0.0762389	0.383651	0.0244734	0.487742	0.0693967	0.473885	0.0503908	0.61508	0.163229	0.539254	0.0171776	0.385401	0.0845268	0.237862	0.0309633	0.238036	0.0734757	0.344419	0.149078	0.251494	0.0793194	0.252065	0	0.309502	0.091931	0.402701	0.0807252	0.27355
8.631	0.076869	0.356718	0.0379401	0.68401	0.199512	0.619088	0	0.51602	0.127358	0.40935	0.0816574	0.373207	0.032186	0.318866	0.060125	0.421171	0.0131649	0.484187	0.112485	0.463482	0.0323231	0.516622	0.151533	0.481299	0.0322821	0.355188	0.112515	0.224659	0.0308863	0.258883	0.0624511	0.333214	0.10586	0.344053	0.124628	0.312118	0.0904288	0.32702	0.103434	0.291875	0.112284	0.430372
8.768	0.094254	0.370872	0.037255	0.677409	0.160013	0.601584	0.0246711	0.582363	0.115453	0.372961	0.0535619	0.393083	0.0206139	0.331431	0.0463417	0.457726	0.0192075	0.429736	0.0424862	0.475886	0.0592656	0.525928	0.139859	0.510632	0.0572351	0.331733	0.129944	0.238176	0.0349972	0.269155	0.0504931	0.301778	0.146707	0.277509	0.178958	0.293277	0.0516395	0.259536	0.12806	0.247713	0.0962588	0.358313
8.905	0.123105	0.396768	0.0520663	0.665203	0.140684	0.597568	0.00536347	0.659075	0.0734993	0.346254	0.0570655	0.404526	0.0093842	0.312216	0.0412024	0.476293	0.0239116	0.416483	0.0340993	0.522134	0.0786673	0.543827	0.170984	0.402337	0.0715423	0.331511	0.126833	0.271213	0.0434884	0.271281	0.0345658	0.283698	0.142494	0.350079	0.104751	0.37085	0.126797	0.433963	0.117794	0.331776	0.0424856	0.321486
9.042	0.143004	0.440099	0.0598338	0.6221	0.115053	0.548761	0.0328643	0.684205	0.0607029	0.361446	0.107489	0.39827	0.00194996	0.258054	0.0377684	0.526881	0.034124	0.448156	0.0160995	0.525552	0.0661924	0.533847	0.136682	0.467453	0.0728755	0.334085	0.118731	0.283954	0.0436487	0.296067	0.027649	0.281422	0.149407	0.32503	0.106338	0.33922	0.112379	0.44781	0.0756375	0.277466	0.0667791	0.219042
9.179	0.13648	0.482788	0.0503247	0.543218	0.0954563	0.498274	0.0498559	0.620203	0.0719676	0.42074	0.121539	0.375741	0	0.249123	0.0306525	0.564814	0.043758	0.461028	0.0103931	0.515733	0.0568432	0.579234	0.168126	0.486867	0.0690866	0.337257	0.123777	0.260445	0.0370623	0.31472	0.0316153	0.267613	0.102877	0.355092	0.161476	0.367885	0.112674	0.465849	0.105588	0.254627	0.130146	0.293508
9.316	0.132428	0.502227	0.0796289	0.458675	0.075939	0.462434	0.0495729	0.598433	0.0836919	0.477242	0.0889166	0.354203	0.0152225	0.283456	0.0307882	0.575437	0.0498007	0.453842	0.00540551	0.484222	0.0343102	0.60073	0.0998129	0.431168	0.0596463	0.34674	0.13439	0.235917	0.0389285	0.31903	0.0483061	0.256619	0.074492	0.40006	0.180263	0.343049	0.0152209	0.459417	0.0769382	0.318626	0.0688897	0.383183
9.453	0.12977	0.526757	0.122162	0.405869	0.0617233	0.43273	0.08363	0.610488	0.0762842	0.497012	0.0765127	0.325101	0.0382971	0.309162	0.0554342	0.612089	0.0454546	0.442849	0.0406639	0.445201	0.0138703	0.615354	0.111778	0.462072	0.0299794	0.35738	0.146394	0.240518	0.0388067	0.340208	0.0660309	0.255467	0.0674983	0.359052	0.117958	0.347223	0.0399934	0.507283	0.0498966	0.336182	0.0528393	0.267074
9.59	0.114994	0.572075	0.151466	0.374871	0.0828216	0.413257	0.0771956	0.574948	0.105121	0.484535	0.0608984	0.327398	0.0548486	0.309642	0.0632227	0.638015	0.0353303	0.464423	0.0622637	0.486858	0.0254354	0.656899	0.11567	0.492505	0.00207304	0.370183	0.140551	0.254684	0.0322844	0.369685	0.0945461	0.262621	0.156152	0.424556	0.0945259	0.320144	0.12141	0.401042	0.0840224	0.320345	0.0626016	0.281942
9.727	0.0899269	0.596064	0.176134	0.346897	0.123311	0.397926	0.0698687	0.537292	0.109633	0.443001	0.050969	0.333772	0.0537343	0.295862	0.0492683	0.630593	0.0144814	0.498857	0.0577052	0.466642	0.0265406	0.70928	0.15144	0.491217	0	0.373857	0.121542	0.253358	0.0175916	0.395453	0.11035	0.286942	0.0780863	0.400514	0.0965015	0.250967	0.125223	0.36045	0.0842546	0.323898	0.0348215	0.318997
9.864	0.0888147	0.563058	0.146965	0.32382	0.139309	0.384401	0.108837	0.424078	0.0870267	0.4107	0.0582334	0.331159	0.049608	0.27781	0.0406065	0.623857	0.00374565	0.497782	0.0371698	0.505043	0.0125977	0.64154	0.202165	0.460319	0.0239644	0.398896	0.112643	0.258877	0	0.389656	0.101282	0.311393	0.179962	0.47388	0.128759	0.265276	0.155765	0.428051	0.0365529	0.397487	0.0568364	0.499886
10.001	0.121961	0.518628	0.128829	0.322713	0.119393	0.385727	0.109211	0.415701	0.064727	0.409303	0.0622823	0.345017	0.0409957	0.267221	0.0703326	0.589062	0.00930905	0.530378	0.0402961	0.485054	0.0213106	0.686095	0.200989	0.406987	0.0513158	0.464207	0.0989861	0.270487	0.0109539	0.36765	0.0881761	0.309053	0.0844014	0.492887	0.159495	0.333402	0.0930001	0.431876	0	0.39426	0.0423985	0.585823
10.138	0.145188	0.540587	0.155953	0.353707	0.106702	0.405926	0.117356	0.434048	0.0290112	0.42299	0.0572456	0.318529	0.0435318	0.251636	0.115901	0.539325	0.0204689	0.559021	0.0632556	0.405716	0	0.603745	0.139331	0.456915	0.0606413	0.516975	0.0891567	0.290898	0.0316559	0.351666	0.0944838	0.2929	0.142541	0.349706	0.177958	0.411556	0.0928496	0.482578	0.0162064	0.46677	0.0888749	0.677997
10.275	0.14007	0.517524	0.172626	0.398162	0.11449	0.44045	0.147526	0.371007	0.00233928	0.426761	0.0663312	0.31643	0.0621609	0.24829	0.124292	0.450105	0.0208104	0.544184	0.0408422	0.38183	0.0362024	0.542249	0.116131	0.462734	0.0730222	0.54989	0.0871235	0.334902	0.0492731	0.351288	0.103119	0.279262	0.148561	0.386288	0.20779	0.467904	0.102389	0.526778	0.0537697	0.460482	0.12628	0.732089
10.412	0.10865	0.481321	0.170779	0.413057	0.112661	0.467696	0.0976961	0.348582	0	0.415418	0.0919469	0.386075	0.0752768	0.265801	0.105735	0.378175	0.0154233	0.519771	0.0143664	0.378156	0.0229516	0.49159	0.145471	0.323419	0.0783802	0.579957	0.0904979	0.388218	0.0400188	0.355784	0.109223	0.27922	0.122346	0.487367	0.214873	0.425513	0.115151	0.558559	0.0460816	0.382776	0.0958728	0.75928
10.549	0.0946745	0.444133	0.174826	0.415857	0.0793639	0.482196	0.074971	0.335751	0.0407424	0.465564	0.10877	0.425709	0.0697577	0.278885	0.0956984	0.341178	0.00647227	0.487597	0.0336813	0.434712	0.0364033	0.489929	0.172117	0.458844	0.0596781	0.573979	0.0892731	0.420992	0.0245372	0.341804	0.0949465	0.27508	0.0892856	0.451076	0.177234	0.365301	0.103442	0.561711	0.0432248	0.44407	0.109352	0.714849
10.686	0.0974054	0.41186	0.176916	0.454114	0.0570176	0.498553	0.0783623	0.298316	0.0948592	0.478669	0.0761834	0.417632	0.05634	0.27607	0.0919753	0.315467	0.00407615	0.440074	0.0551919	0.412354	0.0388815	0.539332	0.177217	0.556589	0.0463469	0.51486	0.0770246	0.428095	0.0118966	0.334084	0.0775812	0.277816	0	0.421422	0.201331	0.476647	0.101304	0.540309	0.0977493	0.366074	0.0793742	0.50584
10.823	0.0979028	0.391818	0.156908	0.496447	0.0646087	0.490711	0.0859722	0.319431	0.106375	0.409133	0.0610784	0.428124	0.0634261	0.260241	0.104106	0.307199	0.0164974	0.406907	0.0614835	0.306363	0.0525342	0.628396	0.114334	0.481187	0.0455496	0.450436	0.0649904	0.434058	0.00174441	0.32031	0.0714658	0.297464	0.126048	0.456299	0.101908	0.488454	0.11194	0.479192	0.146194	0.336304	0.143059	0.69801
10.96	0.0634313	0.39299	0.135396	0.539112	0.07813	0.470712	0.137252	0.336996	0.101529	0.402755	0.0748355	0.443011	0.0987053	0.228899	0.0912082	0.287293	0.0254539	0.407246	0.0256455	0.375308	0.0767472	0.591201	0.13921	0.537576	0.0524448	0.420578	0.0642984	0.450676	0.0104985	0.296506	0.0589694	0.316635	0.110562	0.554133	0.155256	0.497461	0.149243	0.535134	0.102691	0.290987	0.199534	0.585716
11.097	0.039427	0.404305	0.148238	0.570274	0.062976	0.440966	0.111436	0.361101	0.115307	0.409816	0.0655646	0.46158	0.0957862	0.226864	0.0767818	0.303834	0.035457	0.416026	0.0259799	0.400797	0.0813911	0.576931	0.120116	0.544255	0.0745977	0.395524	0.0689406	0.462314	0.0221322	0.282792	0.050144	0.324475	0.126404	0.586091	0.107242	0.514047	0.103179	0.551975	0.0555813	0.364797	0.159371	0.548305
11.234	0.0492973	0.388815	0.173037	0.578348	0.0433508	0.401874	0.149141	0.384216	0.167203	0.408311	0.0493638	0.443803	0.0606578	0.211819	0.0958282	0.347153	0.0475147	0.380807	0.0392206	0.369522	0.0789241	0.592258	0.0900349	0.57742	0.075765	0.36842	0.0701593	0.459668	0.0275257	0.281658	0.0541371	0.334442	0.167681	0.476823	0.0181341	0.659881	0.137873	0.622108	0.0525619	0.366266	0.0950323	0.534006
11.371	0.0861561	0.367026	0.174855	0.549763	0.0324897	0.384359	0.195906	0.393867	0.236956	0.394344	0.053598	0.415968	0.0405024	0.194452	0.104655	0.368574	0.0452012	0.356338	0.0508898	0.342784	0.0742411	0.549824	0.105166	0.570216	0.0522216	0.355288	0.0630552	0.447948	0.034978	0.292164	0.0605516	0.353471	0.0830107	0.375034	0.07902	0.450302	0.20235	0.70734	0.0750046	0.421696	0.0563632	0.409734
11.508	0.0961213	0.360968	0.145778	0.52212	0.0359052	0.423557	0.181304	0.354375	0.273696	0.37234	0.0449857	0.461224	0.051941	0.188904	0.082812	0.355387	0.0450194	0.346516	0.0650835	0.347743	0.0729071	0.52154	0.108008	0.56616	0.0381631	0.343349	0.0569371	0.42567	0.0423083	0.302972	0.0668507	0.381207	0.128964	0.482633	0.0797983	0.459561	0.204877	0.676699	0.0832094	0.534386	0.134598	0.33416
11.645	0.101303	0.370155	0.113975	0.50314	0.0353187	0.48069	0.166581	0.413239	0.305547	0.348077	0.0356479	0.478328	0.0676916	0.196413	0.0802984	0.342596	0.0690798	0.370012	0.0722834	0.377733	0.0761165	0.659886	0.135253	0.63437	0.0412121	0.336175	0.0570534	0.390579	0.0431228	0.285483	0.074774	0.405495	0.0830309	0.438183	0	0.523847	0.200581	0.574861	0.0920646	0.50627	0.0436437	0.371033
11.782	0.118127	0.403247	0.0999739	0.481211	0.0189355	0.479464	0.181444	0.405204	0.331426	0.324637	0.0610784	0.395142	0.0744643	0.199423	0.116338	0.32004	0.09807	0.400357	0.0636791	0.341242	0.0392276	0.681577	0.0914915	0.690096	0.0508693	0.309244	0.0615241	0.340392	0.0310082	0.263059	0.0832949	0.417506	0.110764	0.421933	0.0222051	0.460905	0.032593	0.417906	0.086467	0.589642	0.0761927	0.383076
11.919	0.139685	0.441334	0.100963	0.467979	0.00423656	0.46988	0.19029	0.366894	0.362546	0.294385	0.0910723	0.355509	0.0850324	0.214943	0.118415	0.311523	0.101265	0.378619	0.0311848	0.423054	0.0221423	0.692306	0.0907824	0.580476	0.055717	0.284823	0.0803317	0.305071	0.0243704	0.265743	0.0876463	0.419977	0.127486	0.400042	0.0634483	0.408568	0.048579	0.499343	0.0995203	0.596847	0.0606279	0.357816
12.056	0.158798	0.460556	0.102545	0.463199	0	0.482922	0.147317	0.358048	0.396264	0.268182	0.109424	0.356855	0.097121	0.232953	0.0877919	0.29795	0.0779537	0.324034	0.0640246	0.426517	0.0436371	0.653474	0.133939	0.532761	0.0519537	0.297642	0.115981	0.302641	0.0234982	0.295253	0.0830374	0.416753	0.152189	0.411849	0.0855217	0.391758	0.133696	0.520598	0.0483056	0.624655	0.0376668	0.332809
12.193	0.171679	0.463173	0.0959261	0.441398	0.0111896	0.513426	0.128453	0.356212	0.438037	0.257522	0.146461	0.341889	0.0792637	0.256378	0.0604849	0.275433	0.0588949	0.286964	0.121384	0.466314	0.0844108	0.66854	0.10189	0.477665	0.0451413	0.332013	0.144875	0.308672	0.0355423	0.308239	0.0737278	0.406074	0.181218	0.356959	0.0575393	0.397265	0.15796	0.461522	0.00709574	0.511977	0.0461465	0.296652
12.33	0.182083	0.493045	0.105498	0.408359	0.038251	0.547024	0.139733	0.348397	0.482998	0.257723	0.172514	0.360617	0.0446867	0.269515	0.079313	0.257485	0.0441712	0.297162	0.106427	0.520829	0.121674	0.785088	0.143811	0.430681	0.0297562	0.337867	0.139933	0.300246	0.0482983	0.327224	0.0616246	0.384911	0.16189	0.379274	0.0255038	0.36883	0.0862519	0.343188	0.0287255	0.472709	0.120559	0.2052
12.467	0.190714	0.501431	0.118027	0.38623	0.0720355	0.554908	0.11848	0.389134	0.480304	0.259454	0.169591	0.369209	0.0124078	0.265294	0.091993	0.288053	0.0248811	0.330979	0.127052	0.476208	0.0807381	0.830024	0.202412	0.396464	0.0142625	0.30993	0.106151	0.299755	0.0487537	0.334148	0.0436922	0.35553	0.135682	0.284511	0.0213191	0.380303	0.181704	0.460498	0.0738084	0.35516	0.141079	0.289145
12.604	0.189435	0.516552	0.109951	0.373544	0.101715	0.547061	0.107857	0.396798	0.471107	0.244223	0.146934	0.351391	0.00478206	0.25753	0.0881341	0.330595	0.0129335	0.340283	0.103268	0.491596	0.0765463	0.798385	0.166681	0.386231	0.0100846	0.296781	0.0734113	0.310291	0.0550066	0.334181	0.0410572	0.337256	0.174486	0.306134	0.110804	0.39066	0.295174	0.584416	0.131393	0.356559	0.13796	0.369798
12.741	0.182341	0.540871	0.100331	0.373453	0.115931	0.557065	0.132572	0.377548	0.517649	0.231397	0.124894	0.311917	0.023771	0.268128	0.0771653	0.370543	0.0387951	0.350766	0.0490397	0.511495	0.0569269	0.880926	0.131131	0.350192	0.00852818	0.281515	0.0604034	0.29827	0.0609581	0.345508	0.0613609	0.32438	0.226271	0.396611	0.109673	0.336884	0.0389523	0.385985	0.097999	0.254244	0.0912221	0.346437
12.878	0.200282	0.494007	0.112715	0.381283	0.117305	0.564233	0.200965	0.355557	0.612633	0.202603	0.105668	0.264326	0.0423943	0.287906	0.0858389	0.380042	0.0648604	0.404607	0.10504	0.516711	0.0570944	0.857438	0.133961	0.337334	0.0134397	0.259403	0.058511	0.268531	0.0604066	0.381696	0.0903168	0.312939	0.221427	0.397379	0.119269	0.358602	0.0779234	0.450505	0.0986842	0.188079	0.0400139	0.321613
13.015	0.220475	0.413225	0.112981	0.386853	0.106083	0.549218	0.27806	0.374808	0.669653	0.196295	0.111178	0.252685	0.043172	0.285873	0.0891195	0.443403	0.0652129	0.433763	0.0925122	0.451597	0.0539296	0.823431	0.123837	0.324119	0.0319823	0.246125	0.0584375	0.255084	0.0604643	0.418385	0.117936	0.311113	0.196018	0.409633	0.0861443	0.290382	0.060313	0.524679	0.171575	0.339654	0.0125888	0.236017
13.152	0.238967	0.369211	0.0971901	0.420397	0.073063	0.512815	0.263876	0.435479	0.642257	0.178302	0.134088	0.30087	0.0316231	0.295639	0.0706631	0.505278	0.0760588	0.439462	0.0964911	0.380943	0.0395179	0.783594	0.149126	0.315226	0.0521705	0.246235	0.0703308	0.266245	0.0670443	0.431413	0.137934	0.310383	0.180614	0.390423	0.0869645	0.257761	0.00862331	0.540479	0.150665	0.312176	0.100536	0.233122
13.289	0.283128	0.36392	0.0874542	0.456236	0.0428723	0.50291	0.221234	0.533336	0.71701	0.152876	0.144634	0.365329	0.0328302	0.334156	0.0707988	0.58038	0.100488	0.448474	0.117606	0.392022	0.0112414	0.718962	0.116637	0.27683	0.0633522	0.262162	0.0899529	0.28355	0.0798388	0.425277	0.141106	0.304246	0.180775	0.388411	0.176479	0.36664	0.0375475	0.552986	0.194831	0.311724	0.107982	0.367472
13.426	0.319598	0.338156	0.0718372	0.457445	0.0271318	0.527814	0.215196	0.604411	0.957545	0.14317	0.144418	0.359983	0.0444139	0.371525	0.0618774	0.602045	0.10836	0.445093	0.159323	0.347799	0.000630723	0.697057	0.0948387	0.333834	0.0720718	0.273825	0.11546	0.290873	0.0863162	0.42499	0.122147	0.297944	0.231343	0.384258	0.160543	0.35094	0.0762552	0.50947	0.193211	0.237269	0.0779111	0.343618
13.563	0.398651	0.32622	0.078524	0.428252	0.0318375	0.578785	0.212127	0.659637	1.16999	0.149555	0.135297	0.333654	0.0487317	0.412808	0.0720792	0.616554	0.106878	0.416163	0.173049	0.38053	0.036141	0.802926	0.0859072	0.451122	0.0791903	0.269453	0.148599	0.304053	0.0932297	0.398819	0.103499	0.29811	0.218552	0.404317	0.200708	0.385358	0.0714449	0.433232	0.168335	0.224067	0.120795	0.319348
13.7	0.486498	0.279094	0.0897025	0.402819	0.0421591	0.635614	0.200355	0.667515	1.2059	0.146769	0.146641	0.336227	0.0395506	0.430783	0.060479	0.644547	0.110596	0.394404	0.216761	0.411421	0.0404221	0.842647	0.0994666	0.453072	0.0773851	0.252667	0.180867	0.327723	0.0945765	0.382081	0.0992973	0.293553	0.150986	0.418275	0.121772	0.370427	0.110479	0.45585	0.207333	0.253036	0.119127	0.341053
13.837	0.576665	0.220533	0.0959599	0.384226	0.0585799	0.65445	0.219058	0.614439	1.18047	0.138848	0.189805	0.320192	0.038239	0.426045	0.0329832	0.665321	0.11557	0.407242	0.185002	0.400635	0.0771324	0.770966	0.171886	0.367383	0.0721164	0.237682	0.204856	0.349028	0.0885929	0.373804	0.0821847	0.281414	0.189495	0.412494	0.174175	0.1768	0.197991	0.430384	0.139563	0.239382	0.201651	0.412914
13.974	0.66897	0.188238	0.116073	0.37006	0.0678084	0.614336	0.267951	0.545924	1.1655	0.125789	0.195938	0.33401	0.0514651	0.431908	0.0405239	0.647168	0.126295	0.434776	0.143998	0.316756	0.0501508	0.730952	0.181609	0.316065	0.0778444	0.231763	0.218721	0.3565	0.0888109	0.35605	0.0607536	0.285201	0.136549	0.270279	0.0961842	0.228133	0.200368	0.447634	0.0898406	0.30748	0.0840249	0.456126
14.111	0.718118	0.177708	0.0982419	0.363756	0.0831688	0.568817	0.31146	0.522375	1.18554	0.103777	0.209365	0.361092	0.0658809	0.464256	0.0402289	0.610182	0.134298	0.467513	0.112596	0.332678	0.0662147	0.654209	0.234241	0.306404	0.0945627	0.228596	0.223908	0.35222	0.101009	0.334359	0.0591526	0.30154	0.117119	0.226469	0.0474036	0.365102	0.0754587	0.494062	0.119344	0.343851	0.0628568	0.358984
14.248	0.735797	0.171416	0.0470199	0.327896	0.108968	0.517304	0.314342	0.530474	1.21895	0.0933876	0.209293	0.365645	0.0785325	0.495581	0.0324816	0.566738	0.137961	0.465576	0.113555	0.277292	0.0941451	0.657783	0.270995	0.337425	0.119739	0.231407	0.214061	0.344646	0.100028	0.300928	0.0713052	0.325563	0.187009	0.286674	0.135835	0.363851	0.0737842	0.49705	0.085805	0.287579	0.056799	0.363302
14.385	0.742981	0.168378	0.0200073	0.304635	0.110385	0.471038	0.277568	0.532189	1.16112	0.0867071	0.234251	0.38069	0.0645984	0.51972	0.016409	0.522301	0.131225	0.45045	0.119044	0.214168	0.136303	0.675594	0.233895	0.335592	0.142007	0.235562	0.182686	0.337538	0.112925	0.272252	0.0901532	0.354688	0.279123	0.353626	0.114606	0.383602	0.0966187	0.414462	0.152355	0.359485	0.115254	0.426766
14.522	0.764616	0.163048	0.0441348	0.331405	0.104042	0.410084	0.262662	0.480514	0.998016	0.0892909	0.220566	0.375544	0.054187	0.528234	0	0.485014	0.123221	0.43764	0.156687	0.273103	0.135912	0.650948	0.178652	0.306339	0.147046	0.237361	0.149848	0.324046	0.136	0.247626	0.118583	0.400968	0.250678	0.254175	0.04905	0.262129	0.0726804	0.407749	0.167238	0.288322	0.0706205	0.40754
14.659	0.768134	0.183471	0.0699557	0.357267	0.1215	0.364402	0.264673	0.391312	0.864753	0.0826258	0.217535	0.359627	0.0584177	0.48973	0.0185862	0.426318	0.133175	0.426016	0.163023	0.262247	0.0830935	0.582631	0.306375	0.340471	0.149431	0.235704	0.131739	0.300964	0.1554	0.222906	0.141842	0.456072	0.214601	0.261195	0.0715784	0.125901	0.0754838	0.459563	0.256097	0.286841	0.0850024	0.426243
14.796	0.718321	0.218024	0.0790692	0.356915	0.137057	0.342298	0.269775	0.316442	0.789771	0.0863114	0.263365	0.386155	0.0586266	0.452025	0.0448194	0.405487	0.159752	0.431828	0.164679	0.19934	0.0868779	0.577992	0.272891	0.262284	0.167687	0.236811	0.13308	0.265487	0.177237	0.220824	0.146251	0.470731	0.257766	0.227132	0.114127	0.250016	0.0551516	0.351205	0.244356	0.237983	0.104265	0.483352
14.933	0.660524	0.245974	0.0843473	0.354038	0.140473	0.331077	0.297394	0.279691	0.752935	0.113732	0.336816	0.41874	0.0465554	0.427148	0.0652583	0.418288	0.186908	0.43244	0.200416	0.215201	0.0923311	0.570185	0.308326	0.307162	0.190586	0.238848	0.145971	0.233674	0.194187	0.24014	0.132846	0.480717	0.229529	0.153224	0.140319	0.347176	0.0715954	0.509722	0.316771	0.246778	0.112758	0.504885
15.07	0.643008	0.237736	0.107264	0.351187	0.157888	0.337824	0.349823	0.250036	0.81308	0.136093	0.364618	0.439843	0.0447621	0.384373	0.0824697	0.423679	0.215122	0.415424	0.219882	0.202979	0.127557	0.551518	0.382774	0.260783	0.219015	0.23541	0.156695	0.227899	0.19953	0.257535	0.154004	0.506226	0.358331	0.246906	0.260415	0.341939	0.0689426	0.389348	0.337303	0.271196	0.0532689	0.547223
15.207	0.624755	0.206806	0.130933	0.345795	0.175707	0.346455	0.427906	0.208053	0.933825	0.121669	0.354329	0.469538	0.0367127	0.38135	0.100189	0.421001	0.250689	0.374984	0.254834	0.172511	0.135053	0.616192	0.34486	0.228334	0.23405	0.226251	0.167516	0.253939	0.182284	0.266557	0.188984	0.497223	0.350612	0.265854	0.267593	0.353153	0.0595103	0.45216	0.369263	0.304682	0.118672	0.439368
15.344	0.571429	0.186605	0.127647	0.338771	0.162706	0.362439	0.514179	0.182077	0.981084	0.0968635	0.363888	0.493334	0.05327	0.357874	0.101481	0.392515	0.298567	0.358266	0.236683	0.215806	0.108412	0.629019	0.339523	0.225048	0.239829	0.219993	0.186697	0.290588	0.175025	0.257093	0.199884	0.468533	0.209482	0.153457	0.283895	0.31476	0.124596	0.491419	0.293074	0.220868	0.136783	0.472568
15.481	0.509042	0.151909	0.113642	0.34754	0.135284	0.370512	0.540112	0.18977	0.969589	0.0564858	0.364948	0.473181	0.11261	0.357823	0.0859864	0.343896	0.361538	0.356514	0.193071	0.274474	0.0802916	0.599358	0.345173	0.244334	0.25323	0.224672	0.210533	0.311345	0.19699	0.234561	0.182089	0.429421	0.168998	0.298608	0.445425	0.232402	0.115734	0.489425	0.176668	0.148097	0.0607587	0.517065
15.618	0.485662	0.125507	0.11094	0.368148	0.106045	0.358981	0.50767	0.226927	1.06488	0.0822146	0.453391	0.468588	0.187556	0.324935	0.0886121	0.332524	0.441552	0.363936	0.155038	0.276137	0.119229	0.576094	0.274211	0.255172	0.291119	0.227472	0.236377	0.311225	0.225279	0.212624	0.146212	0.363181	0.291424	0.271291	0.503611	0.238074	0.055484	0.477666	0.249466	0.280717	0.0230732	0.571625
15.755	0.510823	0.122594	0.107828	0.373427	0.0848766	0.353834	0.486887	0.252434	1.18198	0.110729	0.548697	0.433667	0.264812	0.2702	0.106614	0.35037	0.548617	0.370357	0.170173	0.33919	0.122103	0.606016	0.313113	0.269012	0.339577	0.211117	0.267256	0.291697	0.247751	0.193454	0.105479	0.316388	0.318398	0.33822	0.478041	0.243059	0.0505107	0.566289	0.272512	0.23072	0.0616428	0.59586
15.892	0.537292	0.118999	0.104885	0.361475	0.077004	0.347703	0.476404	0.256825	1.18995	0.11561	0.6906	0.36909	0.313793	0.257655	0.101917	0.338284	0.664099	0.32738	0.214326	0.378821	0.109746	0.667665	0.296982	0.26914	0.376905	0.166029	0.312293	0.250367	0.264272	0.180446	0.0988035	0.310006	0.283564	0.357389	0.56691	0.211899	0.0380994	0.545098	0.376608	0.247631	0	0.557468
16.029	0.56532	0.102934	0.13265	0.354003	0.0656596	0.34915	0.461189	0.274859	1.16322	0.106492	0.863329	0.257515	0.330769	0.24826	0.0980409	0.321629	0.778071	0.28174	0.20537	0.333187	0.098616	0.609789	0.297366	0.286877	0.427825	0.114083	0.379084	0.208986	0.283422	0.168217	0.143613	0.26677	0.223825	0.319103	0.612541	0.181679	0.0362242	0.612197	0.490297	0.254778	0.104994	0.670077
16.166	0.5383	0.0749504	0.154187	0.354385	0.0504164	0.355334	0.499107	0.295071	1.15256	0.0990361	0.992972	0.193176	0.340472	0.20172	0.0996458	0.321363	0.901447	0.231162	0.147899	0.390142	0.0753686	0.602452	0.286242	0.269311	0.500637	0.0771908	0.45358	0.171278	0.322401	0.156778	0.175771	0.25104	0.25133	0.290705	0.604513	0.20025	0.0386889	0.689505	0.455579	0.26337	0.144061	0.70505
16.303	0.527462	0.0517229	0.159345	0.342811	0.0821836	0.348429	0.591745	0.267259	1.16437	0.11301	1.06069	0.174409	0.383998	0.138374	0.100785	0.346103	0.908051	0.223502	0.139	0.495915	0.0551575	0.664781	0.293684	0.278572	0.535011	0.055195	0.516702	0.134956	0.383488	0.146822	0.187819	0.267756	0.179827	0.317161	0.582595	0.226401	0.0849287	0.744535	0.46991	0.298452	0.152242	0.670123
16.44	0.508056	0.0354869	0.166432	0.326646	0.125046	0.354929	0.69136	0.2501	1.19053	0.129141	1.06573	0.150257	0.434488	0.0948433	0.0925712	0.355852	0.810653	0.247471	0.190196	0.548036	0.0895682	0.69661	0.358579	0.216562	0.505166	0.0376386	0.558096	0.108743	0.440149	0.124506	0.190729	0.30324	0.222529	0.275985	0.599197	0.227235	0.0900838	0.641182	0.540867	0.318638	0.121412	0.623757
16.577	0.483193	0.0385418	0.166398	0.310966	0.153201	0.384096	0.730799	0.266575	1.2363	0.13264	0.990127	0.155246	0.472634	0.0883012	0.087013	0.377057	0.696014	0.269053	0.205404	0.475548	0.0543817	0.640153	0.384208	0.207996	0.446617	0.0244459	0.563706	0.108593	0.475114	0.0908313	0.188357	0.328564	0.272056	0.314747	0.605213	0.185947	0.0594601	0.604601	0.451363	0.291532	0.072893	0.597373
16.714	0.465939	0.0578611	0.177311	0.324396	0.133506	0.356965	0.735735	0.291897	1.31893	0.130662	0.91186	0.167757	0.50294	0.112411	0.0993508	0.414866	0.695237	0.293624	0.180856	0.342829	0.0704456	0.577355	0.449878	0.216605	0.394414	0.0195335	0.525362	0.121024	0.488505	0.0632415	0.2025	0.334979	0.283813	0.329746	0.635285	0.252999	0.00597674	0.773579	0.342111	0.29137	0.0998886	0.556727
16.851	0.491476	0.0505282	0.220606	0.328947	0.0980695	0.32313	0.720572	0.28224	1.38313	0.127	0.846913	0.125075	0.52609	0.121657	0.127	0.371406	0.684612	0.266022	0.181241	0.304872	0.102188	0.58593	0.463954	0.23028	0.369518	0.012009	0.47235	0.11194	0.550643	0.0507917	0.243181	0.324331	0.196979	0.261218	0.596862	0.276285	0.0702094	0.664233	0.526739	0.218384	0.0408793	0.595154
16.988	0.53849	0.0546697	0.298884	0.295244	0.101462	0.328193	0.723193	0.269408	1.37488	0.128024	0.714605	0.136637	0.588437	0.110143	0.121436	0.33245	0.681323	0.27051	0.190987	0.286429	0.134472	0.643662	0.461574	0.215546	0.374666	0.00405155	0.427074	0.0897332	0.620375	0.047576	0.298042	0.291759	0.179673	0.257979	0.570885	0.268253	0.0893751	0.593415	0.618717	0.194802	0.081354	0.461221
17.125	0.629972	0.0710763	0.37777	0.279625	0.107063	0.353176	0.737821	0.274083	1.35062	0.159945	0.558442	0.13628	0.622375	0.0986404	0.107039	0.378731	0.692125	0.291393	0.196577	0.234707	0.188915	0.551509	0.506792	0.252655	0.392922	0	0.401113	0.0736697	0.671739	0.0356217	0.397724	0.257931	0.202871	0.308263	0.582176	0.3342	0.0968382	0.482403	0.499564	0.214471	0.068566	0.237567
17.262	0.700249	0.0738126	0.482188	0.261119	0.103793	0.355613	0.712005	0.27271	1.22958	0.176347	0.466747	0.171281	0.591692	0.110575	0.105015	0.453078	0.721418	0.27141	0.230091	0.262831	0.349046	0.548615	0.462195	0.252307	0.42542	0.002509	0.40736	0.0783523	0.660541	0.0184437	0.502776	0.211857	0.322543	0.296055	0.593156	0.221516	0.115571	0.46865	0.56648	0.261326	0.110896	0.35041
17.399	0.71257	0.0666902	0.553571	0.243674	0.10362	0.342824	0.642863	0.244307	1.03024	0.184874	0.39027	0.174171	0.532961	0.116644	0.10321	0.469256	0.696179	0.253391	0.217179	0.32476	0.424811	0.572125	0.500911	0.242175	0.495234	0.0275832	0.432255	0.0922011	0.647214	0.0200491	0.550385	0.154383	0.183234	0.237205	0.713617	0.294698	0.142865	0.564254	0.659323	0.336374	0.154608	0.386693
17.536	0.718624	0.0707805	0.560688	0.229182	0.103592	0.33914	0.562302	0.210359	0.890576	0.176316	0.374507	0.206083	0.513084	0.1082	0.105918	0.47063	0.677633	0.256712	0.219057	0.313213	0.381861	0.494121	0.491573	0.21646	0.589924	0.055666	0.451859	0.0975247	0.622491	0.0212139	0.548355	0.118744	0.255898	0.258124	0.820446	0.164071	0.204802	0.386278	0.580788	0.428204	0.114476	0.300117
17.673	0.755727	0.0830854	0.570409	0.215741	0.0950105	0.330888	0.507461	0.206744	0.82697	0.19192	0.3771	0.196106	0.512574	0.0967676	0.111742	0.470272	0.704943	0.259098	0.286787	0.248043	0.355331	0.372288	0.4757	0.198387	0.712317	0.0656177	0.449972	0.0983779	0.609479	0.0178324	0.522466	0.125544	0.277739	0.278625	0.72941	0.148001	0.0888233	0.651626	0.607708	0.306783	0.125508	0.343638
17.81	0.787038	0.0891326	0.634112	0.198698	0.0839946	0.324667	0.491193	0.217896	0.694362	0.2058	0.389468	0.193889	0.49189	0.0956718	0.114515	0.490825	0.740444	0.245204	0.344788	0.185242	0.412286	0.322824	0.516048	0.286321	0.836846	0.0681874	0.439371	0.0987456	0.592329	0.00837835	0.484742	0.146365	0.19581	0.281074	0.861479	0.108462	0.194153	0.499015	0.552387	0.210889	0.117489	0.415753
17.947	0.826755	0.0868286	0.719636	0.166868	0.0836849	0.326883	0.492764	0.193571	0.64899	0.202246	0.386365	0.193612	0.472396	0.109638	0.117011	0.472525	0.745523	0.233468	0.42163	0.192072	0.417204	0.33575	0.401335	0.334267	0.862603	0.0757981	0.43683	0.106626	0.582549	0.0148503	0.446256	0.137066	0.225256	0.317626	0.909009	0.189488	0.0761987	0.398148	0.448141	0.24542	0.170422	0.364724
18.084	0.827297	0.0790805	0.740749	0.131493	0.0965213	0.336824	0.482673	0.149375	0.68708	0.189475	0.393846	0.221525	0.485338	0.103463	0.0917865	0.441769	0.78044	0.214602	0.477663	0.202092	0.478294	0.296341	0.297295	0.290628	0.759276	0.0910385	0.465283	0.10444	0.565028	0.0167791	0.445334	0.111196	0.351889	0.30065	0.525056	0.106349	0.0895696	0.43981	0.407889	0.210477	0.190227	0.323584
18.221	0.742488	0.0827725	0.685754	0.115991	0.117183	0.339093	0.446604	0.0994791	0.76397	0.169348	0.369691	0.217526	0.504524	0.07794	0.0858684	0.418141	0.821394	0.196487	0.512013	0.0930068	0.590474	0.20261	0.335533	0.298158	0.594568	0.103497	0.515661	0.0860437	0.55106	0.0101495	0.4451	0.124702	0.34816	0.390429	0.630693	0.150596	0.176844	0.521668	0.391433	0.185542	0.180439	0.316605
18.358	0.636709	0.0987866	0.634184	0.113109	0.132975	0.329051	0.442325	0.0713883	0.862874	0.180847	0.331121	0.183832	0.508726	0.0760672	0.117105	0.402559	0.829833	0.183841	0.598691	0.0942668	0.662588	0.178262	0.382933	0.291157	0.475142	0.121445	0.561587	0.0787107	0.526818	0	0.453577	0.159166	0.177731	0.306506	0.605674	0.111339	0.219421	0.542736	0.353736	0.214773	0.21005	0.389675
18.495	0.571207	0.127453	0.602931	0.108365	0.141467	0.327956	0.507179	0.0763067	0.960963	0.181025	0.303211	0.189217	0.493178	0.0823066	0.135084	0.370089	0.766107	0.159084	0.713126	0.0779668	0.558017	0.147945	0.334153	0.233368	0.419686	0.139636	0.566309	0.0813262	0.500748	0.00197618	0.456075	0.17985	0.172814	0.335539	0.591486	0.127368	0.178731	0.445564	0.358306	0.208131	0.247686	0.286204
18.632	0.515182	0.143751	0.533853	0.10507	0.132426	0.354366	0.641927	0.0886402	0.980499	0.181778	0.225129	0.217922	0.482187	0.0878624	0.135491	0.340139	0.700415	0.142157	0.798918	0.116575	0.596318	0.0634454	0.327371	0.235314	0.360869	0.150321	0.53227	0.0911246	0.485638	0.0227575	0.44219	0.174039	0.199425	0.387823	0.611362	0.174275	0.151513	0.449973	0.46574	0.148649	0.22897	0.355098
18.769	0.464366	0.146453	0.538601	0.0943833	0.0961835	0.347345	0.744538	0.101252	0.91328	0.181786	0.203634	0.252606	0.499162	0.105347	0.137302	0.323133	0.66796	0.153768	0.841515	0.112149	0.678194	0.0513342	0.384664	0.226154	0.299188	0.156016	0.506169	0.0913256	0.479796	0.029662	0.409759	0.149624	0.269778	0.32895	0.61851	0.147085	0.138211	0.452868	0.571178	0.154965	0.186628	0.345625
18.906	0.455056	0.140907	0.577607	0.0674757	0.0580967	0.34514	0.832495	0.110133	0.846554	0.167409	0.208964	0.273551	0.511297	0.101291	0.153298	0.315495	0.659802	0.184783	0.778973	0.0758651	0.705902	0.0665488	0.435868	0.228115	0.294002	0.164191	0.506052	0.092534	0.482675	0.0190139	0.377822	0.122427	0.339191	0.301621	0.632064	0.168791	0.123705	0.413181	0.583616	0.184619	0.0749351	0.275399
19.043	0.419097	0.139001	0.604644	0.0438531	0.0469822	0.374443	0.819156	0.117542	0.860353	0.150331	0.180869	0.316035	0.504867	0.0791919	0.183656	0.287764	0.645288	0.20491	0.796817	0.0737885	0.750381	0.0725509	0.466812	0.215878	0.311901	0.161197	0.490686	0.102485	0.482951	0.0065748	0.365659	0.120759	0.329087	0.304831	0.489488	0.235925	0.112749	0.40579	0.694035	0.242018	0.201464	0.315345
19.18	0.398163	0.140144	0.605126	0.0573401	0.0687467	0.428609	0.748892	0.114304	0.909868	0.141804	0.178677	0.336188	0.471659	0.0667078	0.205428	0.272363	0.618898	0.192189	0.669397	0.122185	0.770827	0.0470536	0.521066	0.211421	0.342014	0.145126	0.455882	0.101662	0.476422	0.00384766	0.371509	0.137501	0.282099	0.366247	0.41958	0.156403	0.109224	0.397037	0.705085	0.206691	0.386337	0.389035
19.317	0.381809	0.157404	0.552336	0.070419	0.0970514	0.468607	0.749079	0.0725701	0.862679	0.133238	0.184552	0.355509	0.437175	0.0662211	0.223997	0.254534	0.60056	0.158858	0.588788	0.138706	0.716602	0.0556799	0.552312	0.228297	0.349834	0.140937	0.415034	0.0963847	0.456984	0.0188825	0.368183	0.161481	0.217329	0.322453	0.32533	0.155093	0.146458	0.43829	0.516119	0.145508	0.356315	0.345899
19.454	0.365753	0.163065	0.554165	0.0798762	0.0794577	0.536393	0.842234	0.0415481	0.732368	0.117689			0.384723	0.0616695	0.233242	0.209956	0.604951	0.146943	0.598864	0.0799476	0.676191	0.0439921	0.536972	0.187186	0.311199	0.162478	0.357778	0.0734699	0.45767	0.0405444	0.386351	0.172534	0.288206	0.374261	0.27519	0.216344	0.173633	0.406673	0.444627	0.142651	0.453576	0.388181
19.591	0.356217	0.168651	0.595337	0.0861249	0.0686247	0.573843	0.929373	0.0321111	0.675488	0.102311			0.345132	0.0306257	0.2156	0.187354	0.586184	0.154917	0.580513	0.100895	0.731337	0.0107619	0.533048	0.192145	0.249639	0.187151	0.325491	0.0531245	0.491667	0.0595266	0.39464	0.168544	0.281441	0.344588	0.247136	0.216473	0.175715	0.401674	0.537999	0.26838	0.511415	0.385276
19.728	0.349779	0.186645	0.629871	0.0999179	0.0681837	0.565654	0.971946	0.0680863	0.697955	0.106795			0.357035	0.00909859	0.199758	0.159339	0.536394	0.156068	0.608415	0.103188	0.668962	0.0287542	0.541875	0.231856	0.206813	0.193901	0.305557	0.0491202	0.574135	0.0655617	0.401593	0.154637	0.331862	0.501919	0.305418	0.163448	0.106728	0.389137	0.490338	0.259968	0.530983	0.309895
19.865	0.334953	0.20853	0.610588	0.132324	0.0662038	0.560402	0.953104	0.0863056					0.402813	0.0262455	0.221495	0.1307	0.510433	0.158519	0.540027	0.0774074	0.711204	0.0241107	0.478305	0.210277	0.212088	0.201301	0.278377	0.062875	0.639159	0.0729716	0.416945	0.142049	0.29395	0.527183	0.364334	0.168662	0.327448	0.344907	0.356715	0.190082	0.487028	0.256432
20.002	0.291289	0.224379	0.544212	0.155034	0.0935984	0.557092	0.895177	0.0973588					0.486417	0.0485071	0.293609	0.0956262	0.520569	0.161049	0.528781	0.0925532	0.795403	0.00529952	0.496849	0.241833	0.244071	0.221147	0.239525	0.0838669	0.645008	0.0782987	0.432119	0.13045	0.349537	0.450408	0.397345	0.250592	0.199246	0.408007	0.452379	0.197739	0.433822	0.198931
20.139	0.260453	0.254092	0.463912	0.16572	0.128706	0.523299	0.825756	0.0780794					0.54639	0.0575838	0.34725	0.0705507	0.520117	0.152135	0.546224	0.155798	0.777285	0.044034	0.521055	0.187961	0.234981	0.226345	0.202033	0.104111	0.618714	0.091649	0.426125	0.131547	0.368422	0.388155	0.390706	0.221352	0.202613	0.435904	0.552399	0.22917	0.456272	0.14743
20.276	0.23459	0.291974	0.395032	0.185385	0.148692	0.503552	0.803989	0.0560019					0.554835	0.0383701	0.38824	0.0700003	0.522541	0.152914	0.572912	0.138474	0.689051	0.0716296	0.546365	0.131252	0.184705	0.229848	0.17143	0.13146	0.600199	0.10716	0.399079	0.141428	0.348597	0.405608	0.396836	0.149005	0.112417	0.389687	0.532685	0.202558	0.446199	0.140974
20.413	0.180017	0.327711	0.354642	0.204289	0.142401	0.500358	0.860162	0.0473412					0.580637	0.0123292	0.472751	0.0785971	0.539176	0.189001	0.499764	0.108929	0.805204	0.060784	0.302791	0.156047	0.120798	0.255432	0.158746	0.153681	0.579311	0.112331	0.367578	0.125484	0.394476	0.505472	0.281087	0.0887757	0.136568	0.1652	0.458656	0.160892	0.373306	0.0933321
20.55	0.132546	0.404772	0.339753	0.238226	0.135603	0.483869	0.844433	0.0538816					0.628388	0.0170322	0.546447	0.0836928	0.543852	0.212876	0.53222	0.0997355	0.83295	0.0306991	0.304814	0.166265	0.0828899	0.277855	0.168368	0.159909	0.529043	0.129488	0.365118	0.100505	0.217423	0.406643	0.373428	0.204495	0.167618	0.286913	0.442073	0.166959	0.426282	0.143549
20.687	0.108121	0.466046	0.328266	0.313618	0.152347	0.449829	0.777494	0.0531343					0.6448	0.0160145	0.57851	0.101902	0.527884	0.202062	0.578261	0.0706535	0.81371	0.0388461	0.240996	0.210363	0.0733602	0.271815			0.472536	0.159284	0.3602	0.0816126	0.236173	0.242195	0.470815	0.301321	0.163404	0.304438	0.454563	0.185896	0.290321	0.138754
20.824	0.10298	0.457086	0.30408	0.398432	0.183411	0.403068	0.772344	0.0533197					0.644086	0.00429797	0.565712	0.106578	0.487029	0.23302	0.587768	0.0932638	0.673724	0.0491799	0.327585	0.208941					0.405793	0.197625	0.332285	0.0768518	0.280427	0.419909	0.408313	0.232155	0.16945	0.326909	0.537342	0.187655	0.439506	0.119558
20.961	0.130005	0.430662	0.254306	0.464413	0.207347	0.380454	0.844716	0.04127					0.633593	0.00712169	0.531029	0.0775076	0.420086	0.272607	0.572315	0.12603	0.621167	0.042573	0.455182	0.221462					0.328686	0.232706	0.294342	0.0885948	0.308576	0.465354	0.434787	0.198524	0.190829	0.286995	0.558577	0.228183	0.32724	0.0926312
21.098	0.151138	0.447677	0.209134	0.500701	0.217298	0.368786	0.870649	0.0370005					0.620164	0.0225779	0.524975	0.0759245	0.407907	0.25108	0.524435	0.113903	0.640502	0.0626684	0.525425	0.184098					0.266625	0.272124	0.264202	0.102084	0.313312	0.344769	0.420939	0.357762	0.241233	0.262986	0.53531	0.154111	0.41459	0.108485
21.235	0.16057	0.456318	0.192508	0.514178	0.236572	0.356465	0.875564	0.0232014					0.637981	0.00930675	0.517216	0.0785744	0.442692	0.215864	0.438727	0.131196	0.583112	0.0109154	0.535796	0.127132					0.243505	0.279776	0.26047	0.104053	0.360884	0.30361	0.477293	0.436674	0.402869	0.220499	0.546261	0.129972	0.413482	0.165137
21.372	0.166113	0.400591	0.177321	0.499151	0.254348	0.33514	0.8728	0.0404242					0.659686	0	0.514957	0.0731894	0.514405	0.197436	0.457434	0.109503	0.513615	0	0.528162	0.131364					0.241036	0.282962	0.270754	0.106724	0.435014	0.296218	0.398405	0.310762	0.56431	0.228697	0.549391	0.170663	0.393677	0.0854791
21.509	0.180564	0.343338	0.159407	0.426615	0.27806	0.303647	0.836052	0.0481175					0.650162	0.0144835	0.493975	0.0608304	0.58685	0.200837	0.513479	0.0820444	0.511047	0.050962	0.572836	0.132662					0.241722	0.29959	0.284774	0.119976	0.490768	0.279974	0.475958	0.516296	0.631647	0.167445	0.52257	0.0936013	0.507493	0.116637
21.646			0.15809	0.387215	0.298403	0.274564	0.77183	0.0323313					0.653894	0.00371608	0.47746	0.0521541	0.595779	0.206682	0.522306	0.0870795	0.540708	0.0840805	0.618944	0.170952					0.216666	0.324042	0.301334	0.130282			0.328928	0.405021	0.44882	0.14422	0.504918	0.00588673	0.437725	0.10246
21.783			0.147056	0.374478	0.336255	0.258897	0.774146	0.0253854					0.684739	0.00245531	0.485307	0.0447205	0.547807	0.194915	0.491768	0.0968676	0.524733	0.0860486	0.56773	0.151099					0.190897	0.343422	0.332665	0.133661			0.168236	0.36607	0.33276	0.270026	0.469335	0	0.548559	0.0640992
21.92					0.428441	0.239145	0.737703	0.0473412					0.683474	0.0265524	0.528197	0.049453	0.51376	0.172731	0.49826	0.1015	0.468074	0.106484	0.535774	0.0803991					0.198112	0.352841	0.374684	0.127014			0.240047	0.533587	0.345503	0.344007	0.661913	0.0648353	0.572622	0.0496579
22.057					0.527533	0.2089	0.655362	0.0702645					0.631179	0.0348486	0.521435	0.0451688	0.524044	0.158132	0.526006	0.103752	0.547713	0.0988112	0.641265	0.0722282							0.423904	0.121892			0.333849	0.442035	0.354672	0.245373	0.58131	0.0649572	0.608334	0.0818117
22.194					0.586001	0.187043	0.585615	0.0555616					0.556001	0.0150932	0.485425	0.0309089	0.594595	0.161138	0.49262	0.164794	0.613916	0.178951	0.620252	0.0824458							0.468045	0.112404			0.30907	0.411022	0.417556	0.125339	0.495813	0.0323189	0.473275	0.0794903
22.331					0.618467	0.171938	0.569298	0.0383098					0.537679	0.0104806	0.487856	0.0359137	0.634602	0.158791	0.497028	0.15735	0.58271	0.165616	0.651812	0.0949345							0.490732	0.105531			0.295102	0.362824	0.392991	0.196782	0.502514	0.102385	0.664068	0.0252709
22.468					0.649634	0.182517	0.595258	0.0253506					0.617611	0.0391459	0.527802	0.0556893	0.608217	0.132531	0.531345	0.108984	0.557911	0.173065	0.694238	0.0872232							0.489731	0.098915			0.2616	0.297809	0.376008	0.2232	0.494152	0.122048	0.667997	0
22.605					0.671037	0.203295	0.672963	0.0297765					0.670109	0.0415563	0.492511	0.0605069	0.623613	0.136182	0.469143	0.0853457	0.523372	0.207333	0.649954	0.0345644							0.461187	0.0925985					0.517844	0.181842	0.492027	0.0465655	0.728158	0.00614121
22.742					0.663943	0.218131	0.731713	0.0341967					0.632851	0.0388361	0.41357	0.0702386	0.677115	0.146621	0.455729	0.0480281	0.5426	0.208905	0.576271	0.0372844							0.421091	0.0952267					0.550588	0.1938	0.456403	0.0986114	0.524969	0.0156451
22.879					0.660645	0.23563	0.767146	0.0386226					0.580886	0.0264223	0.330204	0.081894	0.693045	0.139109	0.490542	0.00279731	0.565546	0.14083	0.461288	0.0696097							0.395079	0.101223					0.555335	0.182099	0.519771	0.115163	0.481257	0.00415509
23.016					0.604908	0.263986	0.83418	0.0480885					0.53035	0.0304081	0.290045	0.0885161	0.637163	0.134223	0.479129	0.0438951	0.518281	0.199172	0.460019	0.0533055													0.566643	0.138366	0.470734	0.0771196	0.444188	0.0701134
23.153					0.505117	0.29289	0.854894	0.0646915					0.510415	0.0224798	0.287803	0.0781318	0.57883	0.141146	0.459998	0.071964	0.503886	0.230359	0.493227	0.0500724													0.523281	0.2056	0.410089	0.0798772	0.329257	0.14519
23.29					0.469883	0.317652	0.808765	0.0698879					0.506701	0.0162741	0.298312	0.0533401	0.568375	0.161048	0.426489	0.0587234	0.494682	0.205709	0.613937	0.0745421													0.699812	0.163387	0.517861	0.150187	0.415928	0.230349
23.427					0.500988	0.334867	0.790576	0.0486504					0.536646	0.0637445	0.272061	0.057176	0.600384	0.179593	0.376084	0.0240468	0.445603	0.222119	0.524149	0.0444613													0.609753	0.141536	0.559524	0.144062	0.342307	0.201573
23.564					0.525586	0.351281	0.778804	0.0281545					0.613577	0.0849056	0.22664	0.0740576	0.625293	0.174015	0.346348	0.0292029	0.403021	0.223794	0.484175	0.082745													0.596501	0.065169	0.517751	0.102408	0.31825	0.164324
23.701					0.496817	0.409331	0.733023	0.0223961					0.638764	0.0697036	0.227625	0.0486813	0.624478	0.155	0.373209	0.0265014	0.385919	0.247691	0.52864	0.0640307													0.616206	0.146921	0.512798	0.0560226	0.271363	0.162435
23.838					0.43371	0.477817	0.670856	0.0159484					0.611517	0.0570096	0.251363	0.0526705	0.609429	0.143583	0.4084	0.0261536	0.443058	0.235775	0.619807	0.0831245													0.592243	0.200682	0.47992	0.0890556	0.20581	0.181366
23.975					0.381623	0.517641	0.607147	0.0108389					0.524651	0.0668687	0.284983	0.0492544	0.592254	0.137706	0.406617	0.0619088	0.429796	0.175787	0.716581	0.10504													0.498766	0.191847	0.432503	0.109833	0.244124	0.190611
24.112					0.353811	0.538919	0.534309	0.0173156					0.423572	0.0714836	0.309829	0.0490558	0.548545	0.153972	0.431009	0.0599683	0.329717	0.253391	0.751037	0.0822641													0.450651	0.125754	0.351982	0.0563767	0.11254	0.159326
24.249					0.343372	0.562655	0.496508	0.0125826					0.347187	0.084028	0.346837	0.0603991	0.502347	0.178556	0.455161	0.0459515	0.388765	0.301687	0.627678	0.0762949													0.4484	0.101639	0.316509	0.114582	0.107876	0.316234
24.386					0.328256	0.603984	0.514318	0.00342372					0.322058	0.0739141	0.383295	0.100728	0.47588	0.17283	0.446428	0.0897508			0.466081	0.141881													0.338561	0.104212	0.305076	0.116533	0.102348	0.3667
24.523					0.333914	0.627704	0.525881	0					0.360064	0.0632194	0.400843	0.145306	0.44912	0.167513	0.471193	0.145047			0.529981	0.1205													0.37402	0.12214	0.343551	0.157078	0.118323	0.331717
24.66					0.354937	0.570707	0.514693	0.00473296					0.338737	0.0373423	0.399757	0.149625	0.40924	0.166158	0.433711	0.144553			0.404852	0.0998295													0.343691	0.152979	0.267954	0.165966	0.122881	0.304201
24.797							0.503717	0.0289018					0.343577	0.0282691	0.371518	0.13991	0.36405	0.130847	0.342793	0.147884			0.380267	0.251067													0.288288	0.238626	0.235611	0.153728	0.11851	0.346117
24.934							0.497562	0.0548143					0.354847	0.0124522	0.312319	0.142753	0.323404	0.114013	0.320023	0.249802			0.36618	0.212928													0.295438	0.218031	0.232975	0.23591	0.141079	0.433064
25.071							0.496016	0.0752813					0.416532	0.020423	0.308927	0.157626	0.303927	0.118683	0.349163	0.349256			0.421649	0.174185													0.28398	0.253051	0.250946	0.213443
25.208							0.495733	0.103899									0.310498	0.126149	0.373225	0.383877																	0.281245	0.244017	0.194552	0.191673
25.345							0.470104	0.144109									0.309116	0.124699	0.259554	0.3598																	0.282832	0.183491	0.186318	0.211011
25.482							0.424254	0.180582									0.313781	0.116566	0.323773	0.382576																	0.277407	0.203892	0.171715	0.254453
25.619																	0.345542	0.145971	0.302848	0.379179																	0.181761	0.231813	0.133745	0.210041
25.756																	0.371315	0.156714																			0.224125	0.219084	0.152233	0.247422
25.893																	0.376262	0.136555																			0.228207	0.251887
26.03																	0.399628	0.133127																			0.251268	0.212657
26.167																	0.460076	0.149952																			0.331185	0.337072
26.304																	0.453307	0.163555																			0.249926	0.270845
26.441																	0.386485	0.17398																			0.238386	0.291468
26.578																	0.3504	0.160404																			0.121692	0.293123
26.715																	0.333374	0.154774																			0.141454	0.355772
26.852																	0.336294	0.173479																			0.11273	0.347001
26.989																	0.380696	0.191647																			0.119014	0.433396
27.126																	0.418307	0.18197																			0.145323	0.519229
27.263																	0.397585	0.175691																			0.161748	0.439933
27.4																	0.313192	0.180531																			0.152811	0.407708
27.537																	0.239479	0.187061																			0.13892	0.454365
27.674																	0.194499	0.183827																			0.0746559	0.416743
27.811																	0.166235	0.199797
27.948																	0.138451	0.228296
28.085																	0.132872	0.241455
28.222																	0.129379	0.273286
28.359																	0.129506	0.310315
28.496
28.633
28.77
28.907
29.044
29.181
29.318
29.455
29.592
29.729
29.866
30.003
30.14
30.277
30.414
30.551
30.688
30.825
30.962
31.099
31.236
31.373
31.51
31.647
31.784
31.921
32.058
32.195
32.332
32.469
32.606
32.743
32.88
33.017
33.154
33.291
33.428
33.565
33.702
33.839
33.976
34.113
34.25
34.387
34.524
34.661
34.798
34.935
35.072
35.209
35.346
35.483
35.62
35.757
35.894
36.031
36.168
36.305
36.442
36.579
36.716
36.853
36.99
37.127
37.264
37.401
37.538
37.675
37.812
37.949
38.086
38.223
38.36
38.497
38.634
38.771
38.908
39.045
39.182
39.319
39.456
39.593
39.73
