# Supplementary material for: Progenitors oppositely polarize WNT activators and inhibitors to orchestrate tissue development
Source: eLife. 2020 Apr 20;9:e54304. doi: 10.7554/eLife.54304 (PMC7224699; doi:10.7554/eLife.54304)
Supplement: Figure 4—source data 1. [file elife-54304-fig4-data1.xlsx]

## Sheet: Wif1
Figure 4 - WIF1 Pixel intensity profile (Normalized Pixel Intensity measured from basal to apical side of progenitor cells )
	Cell 1		Cell 2		Cell 3		Cell 4		Cell 5		Cell 6		Cell 7		Cell 8		Cell 9		Cell 10		Cell 11		Cell 12		Cell 13		Cell 14		Cell 15		Cell 16		Cell 17		Cell 18		Cell 19		Cell 20		Cell 21		Cell 22		Cell 23		Cell 24		Cell 25
	Normalized Pixel Intensity	Normalized Pixel Intensity	Normalized Pixel Intensity	Normalized Pixel Intensity	Normalized Pixel Intensity	Normalized Pixel Intensity	Normalized Pixel Intensity	Normalized Pixel Intensity	Normalized Pixel Intensity	Normalized Pixel Intensity	Normalized Pixel Intensity	Normalized Pixel Intensity	Normalized Pixel Intensity	Normalized Pixel Intensity	Normalized Pixel Intensity	Normalized Pixel Intensity	Normalized Pixel Intensity	Normalized Pixel Intensity	Normalized Pixel Intensity	Normalized Pixel Intensity	Normalized Pixel Intensity	Normalized Pixel Intensity	Normalized Pixel Intensity	Normalized Pixel Intensity	Normalized Pixel Intensity	Normalized Pixel Intensity	Normalized Pixel Intensity	Normalized Pixel Intensity	Normalized Pixel Intensity	Normalized Pixel Intensity	Normalized Pixel Intensity	Normalized Pixel Intensity	Normalized Pixel Intensity	Normalized Pixel Intensity	Normalized Pixel Intensity	Normalized Pixel Intensity	Normalized Pixel Intensity	Normalized Pixel Intensity	Normalized Pixel Intensity	Normalized Pixel Intensity	Normalized Pixel Intensity	Normalized Pixel Intensity	Normalized Pixel Intensity	Normalized Pixel Intensity	Normalized Pixel Intensity	Normalized Pixel Intensity	Normalized Pixel Intensity	Normalized Pixel Intensity	Normalized Pixel Intensity
(basal to apical distance um)	MYC - Tag	DAPI	MYC - Tag	DAPI	MYC - Tag	DAPI	MYC - Tag	DAPI	MYC - Tag	DAPI	MYC - Tag	DAPI	MYC - Tag	DAPI	MYC - Tag	DAPI	MYC - Tag	DAPI	MYC - Tag	DAPI	MYC - Tag	DAPI	MYC - Tag	DAPI	MYC - Tag	DAPI	MYC - Tag	DAPI	MYC - Tag	DAPI	MYC - Tag	DAPI	MYC - Tag	DAPI	MYC - Tag	DAPI	MYC - Tag	DAPI	MYC - Tag	DAPI	MYC - Tag	DAPI	MYC - Tag	DAPI	MYC - Tag	DAPI	MYC - Tag	DAPI	MYC - Tag
0	0.163294	0.342347	0.354989	0.191199	0.14786	0.248833	0.271978	0.0502274	0.0959083	0.0137159	0.212437	0.0829969	0.219418	0	0.135033	0.339166	0.336571	0.146353	0.336571	0.146353	0.21432	0.0516248	0.189381	0.235654	0.0747287	0.118307	0.182654	0.0586033	0.107331	0.10919	0.234415	0.235109	0.13556	0.187524	0.0884225	0.0198488	0.140209	0.15057	0.153654	0.31858	0.0497679	0.0686733	0.285995	0.125876	0.133935	0.750273	0.232456	0.491408	0.0269799
0.137	0.134839	0.35165	0.312375	0.211075	0.197174	0.156743	0.315379	0.0140751	0.153046	0.0166662	0.236138	0.0789498	0.31584	0.0474326	0.139497	0.36533	0.354425	0.199319	0.354425	0.199319	0.196624	0	0.0952098	0.209164	0.0910816	0.0794636	0.215646	0	0.113599	0.143986	0.238204	0.266447	0.159381	0.128427	0.123643	0.090588	0.0900163	0.218952	0.142781	0.358037	0.13837	0.0282725	0.307354	0.0803206	0.14857	0.681063	0.297915	0.463008	0.0730266
0.274	0.144025	0.348578	0.319236	0.232137	0.221148	0.104999	0.261963	0.0195051	0.223576	0	0.257128	0.0826453	0.453483	0.0799669	0.189877	0.381915	0.334369	0.208562	0.334369	0.208562	0.181851	0.00227409	0.165878	0.175596	0.0924941	0.0668196	0.211078	0.00765504	0.16468	0.15152	0.267178	0.265808	0.138858	0.113434	0.110849	0.0547701	0.0945551	0.155151	0.12536	0.364394	0.132005	0.0716051	0.29942	0.0540773	0.245976	0.657223	0.322067	0.438143	0.0831901
0.411	0.148661	0.43449	0.327451	0.291251	0.317403	0.0657453	0.215891	0.0390102	0.240353	0.000928202	0.268241	0.106821	0.488015	0.104482	0.279938	0.336784	0.401079	0.185812	0.401079	0.185812	0.157452	0.0102852	0.227364	0.182147	0.0692919	0.0640719	0.169544	0.0285761	0.18131	0.154225	0.24496	0.246712	0.12135	0.0802841	0.11983	0.0468331	0.152216	0.140556	0.0940167	0.330373	0.168858	0.0529324	0.363905	0	0.228558	0.651671	0.394224	0.41226	0.0921621
0.548	0.117182	0.546982	0.289176	0.369661	0.32479	0.0235603	0.201647	0.0224344	0.24888	0.00825393	0.242138	0.132098	0.455039	0.136903	0.281104	0.258776	0.215774	0.186849	0.215774	0.186849	0.16078	0.0317106	0.267751	0.182496	0.0493092	0.0857132	0.157353	0.0870296	0.153646	0.11239	0.27061	0.235284	0.0800308	0.0511006	0.154849	0.0247152	0.202029	0.0561358	0.0801073	0.342359	0.165693	0.0488737	0.334003	0.0236286	0.27331	0.611849	0.384514	0.332362	0.0720755
0.685	0.130693	0.574501	0.196489	0.414764	0.268885	0	0.2219	0.00735906	0.270621	0.0224181	0.206576	0.14835	0.44503	0.161377	0.251634	0.213083	0.158707	0.0861455	0.158707	0.0861455	0.134528	0.012614	0.263991	0.161401	0.131042	0.0389613	0.156384	0.115796	0.145151	0.0846122	0.29093	0.230553	0.0889299	0.015619	0.180183	0	0.27548	0.0238125	0.131553	0.261768	0.201899	0.0704278	0.276433	0.0157906	0.258059	0.424678	0.372964	0.305485	0.0877006
0.822	0.116784	0.671563	0.138868	0.454613	0.288765	0.0140477	0.230581	0	0.292169	0.0218359	0.179844	0.210019	0.341103	0.174744	0.266299	0.167366	0.16506	0.111025	0.16506	0.111025	0.139093	0.0108063	0.243912	0.111747	0.111821	0.0162967	0.184113	0.0883029	0.159782	0.11092	0.276609	0.205566	0.0906563	0	0.243505	0.0196259	0.308429	0.0526042	0.250496	0.226615	0.134728	0.0548458	0.397873	0.12224	0.276549	0.316775	0.397208	0.325903	0.0905099
0.959	0.087975	0.812793	0.11144	0.520823	0.40604	0.0285522	0.312708	0.022363	0.305998	0.0160913	0.176803	0.278051	0.259605	0.197576	0.311628	0.126967	0.176189	0.12324	0.176189	0.12324	0.146282	0.0468146	0.301541	0.0872579	0.100489	0.0325343	0.220428	0.073904	0.151811	0.0919696	0.296508	0.186337	0.114037	0.0199277	0.222263	0.0548577	0.354178	0.0519994	0.181854	0.123191	0.17957	0.0183399	0.301658	0.151324	0.305823	0.200347	0.415165	0.335635	0.139876
1.096	0.105463	0.853726	0.0967034	0.57941	0.591055	0.0486129	0.328288	0.0347233	0.297174	0.0234633	0.206318	0.30162	0.208545	0.231383	0.371681	0.0724711	0.134213	0.125832	0.134213	0.125832	0.192148	0.0896942	0.399292	0.060136	0.12085	0.0532173	0.260489	0.0448442	0.183437	0.0999975	0.300386	0.170117	0.201714	0.0184056	0.279565	0.0974881	0.411445	0.0526285	0.173066	0.0441151	0.169562	0	0.271352	0.265841	0.307374	0.138843	0.340616	0.321147	0.149157
1.233	0.132589	0.888507	0.0943002	0.59575	0.658938	0.0653577	0.310705	0.031151	0.310006	0.0302384	0.218634	0.325047	0.1658	0.251901	0.403851	0.0693756	0.102125	0.177484	0.102125	0.177484	0.227516	0.117674	0.413913	0.077629	0.190308	0.03661	0.361717	0.0268785	0.228134	0.0936829	0.288211	0.145131	0.255869	0.0690943	0.28148	0.0831795	0.416734	0.0478242	0.170649	0.0287415	0.171754	0.0236062	0.269518	0.365928	0.248471	0.0757691	0.443606	0.187703	0.173965
1.37	0.144368	0.941726	0.0806259	0.600512	0.512784	0.0908671	0.338749	0.0823786	0.325351	0.0505224	0.212659	0.35123	0.124979	0.265638	0.42472	0.0395542	0.159227	0.263926	0.159227	0.263926	0.170228	0.183655	0.467905	0.0185094	0.197034	0.0130374	0.289022	0.0780389	0.285578	0.0950846	0.284696	0.134242	0.215347	0.0872903	0.255716	0.144128	0.40664	0.047251	0.16082	0	0.1852	0.0282523	0.167204	0.347866	0.200188	0.0496065	0.499213	0.262333	0.262984
1.507	0.128067	0.949273	0.0555615	0.6366	0.392257	0.168631	0.359447	0.156255	0.293844	0.0955	0.170292	0.349044	0.0797075	0.302586	0.450844	0.0134846	0.197954	0.318311	0.197954	0.318311	0.112281	0.259042	0.527028	0	0.161114	0.017746	0.262848	0.052596	0.337966	0.0793269	0.270355	0.144081	0.220216	0.0881574	0.246246	0.214292	0.330297	0.0466802	0.178402	0.0208225	0.196449	0.0720614	0.167608	0.393651	0.310612	0.0472601	0.476051	0.22448	0.335383
1.644	0.128901	0.908386	0.0508476	0.672201	0.281594	0.229568	0.361451	0.208912	0.227387	0.153497	0.189624	0.349987	0.0627747	0.339286	0.510581	0.0171302	0.164168	0.3412	0.164168	0.3412	0.123652	0.272831	0.520678	0.0055805	0.131074	0.0274028	0.20821	0.142509	0.31328	0.0594892	0.212955	0.186213	0.20862	0.162993	0.194633	0.282378	0.285973	0.00305065	0.145117	0.0373024	0.208654	0.0888182	0.24206	0.369904	0.447138	0.0185191	0.505631	0.182118	0.373615
1.781	0.148203	0.857519	0.0655978	0.625068	0.210807	0.231661	0.27821	0.251851	0.176759	0.191256	0.226565	0.327183	0.060243	0.368875	0.489794	0.0103891	0.106226	0.403755	0.106226	0.403755	0.123325	0.323353	0.458268	0.0599409	0.153737	0.0236406	0.157489	0.194344	0.279675	0.0511228	0.231467	0.203396	0.174398	0.180462	0.159201	0.301321	0.200524	0	0.164156	0.109655	0.2142	0.0497989	0.310406	0.303672	0.515755	0.00737561	0.509065	0.171603	0.389407
1.918	0.15205	0.805449	0.0762559	0.613802	0.199326	0.261882	0.198086	0.268427	0.148186	0.215343	0.202544	0.328104	0.0699966	0.389057	0.422195	0	0.157494	0.488188	0.157494	0.488188	0.075442	0.313949	0.364892	0.0999888	0.152906	0	0.109855	0.216285	0.284388	0.0286307	0.227213	0.209178	0.166897	0.179939	0.137232	0.430254	0.224481	0.00114885	0.162138	0.0915467	0.186971	0.0451956	0.342951	0.280155	0.394485	0.011565	0.535547	0.15498	0.33629
2.055	0.125735	0.688629	0.0680055	0.624811	0.242584	0.283648	0.121745	0.277072	0.151386	0.262306	0.182984	0.327058	0.0856183	0.390606	0.372817	0.0232692	0.151227	0.548891	0.151227	0.548891	0.0645846	0.392379	0.332211	0.126557	0.211628	0.0351607	0.0932134	0.303976	0.273206	0	0.179148	0.174216	0.155206	0.215438	0.108041	0.458615	0.217815	0.0264891	0.187442	0.151693	0.129313	0.0987255	0.349865	0.254138	0.316765	0.061629	0.521213	0.114311	0.266749
2.192	0.0589315	0.618117	0.0575811	0.656722	0.205655	0.261136	0.102381	0.284503	0.151	0.311744	0.182276	0.285258	0.0840033	0.396452	0.348398	0.0635034	0.12237	0.571669	0.12237	0.571669	0.165943	0.325889	0.267371	0.176555	0.239601	0.0549682	0.0816583	0.357908	0.31017	0.00173017	0.146939	0.173742	0.187617	0.233771	0.0840933	0.475759	0.219149	0.0635924	0.120369	0.195941	0.0435916	0.119329	0.321797	0.254026	0.387039	0	0.527272	0.139227	0.204156
2.329	0.0277414	0.609432	0.0616027	0.657012	0.179467	0.262701	0.094814	0.298792	0.125879	0.341403	0.181502	0.257153	0.0649439	0.404954	0.298534	0.108193	0.0925694	0.625245	0.0925694	0.625245	0.30975	0.325978	0.18677	0.259406	0.242069	0.0699488	0.0857449	0.374133	0.325864	0.0214019	0.155332	0.182365	0.123095	0.29243	0.0648476	0.464043	0.246434	0.0887723	0.103891	0.251721	0.0117324	0.0900056	0.30593	0.269247	0.547394	0.0213687	0.457092	0.0845831	0.197674
2.466	0.0678227	0.615613	0.0552969	0.663044	0.221682	0.306744	0.102159	0.30508	0.101453	0.378599	0.172104	0.244911	0.0522376	0.397194	0.228955	0.173132	0.0867305	0.618136	0.0867305	0.618136	0.328482	0.301553	0.109659	0.30241	0.284779	0.101043	0.125565	0.418843	0.307139	0.0523722	0.168475	0.205926	0.133754	0.32925	0.0899254	0.513052	0.210157	0.133276	0.10776	0.327738	0.0512134	0.0918106	0.198529	0.286972	0.660278	0.0625081	0.367674	0.0399556	0.203097
2.603	0.0974601	0.571734	0.0325784	0.64923	0.26532	0.333466	0.115735	0.319155	0.109256	0.411617	0.151604	0.236179	0.0626361	0.374474	0.190006	0.211376	0.0777864	0.606587	0.0777864	0.606587	0.299121	0.258245	0.0663866	0.233994	0.298813	0.147108	0.100664	0.460891	0.283928	0.0746273	0.123276	0.225961	0.122842	0.366444	0.0751165	0.598674	0.150317	0.190525	0.103178	0.437137	0.105717	0.165571	0.193238	0.309805	0.563908	0.109288	0.362172	0.0523449	0.163772
2.74	0.0777273	0.523856	0.0270091	0.64329	0.227995	0.308016	0.110616	0.284217	0.110698	0.441768	0.118764	0.231625	0.0752891	0.362109	0.175705	0.217567	0.0558035	0.594383	0.0558035	0.594383	0.210535	0.222268	0.0485483	0.299533	0.235321	0.177401	0.0961363	0.436365	0.31209	0.11627	0.134885	0.211498	0.149464	0.399898	0.0344987	0.550809	0.185322	0.191625	0.134884	0.494116	0.0903055	0.188688	0.229855	0.319463	0.387943	0.136248	0.225462	0.0503068	0.172116
2.877	0.0334238	0.546643	0.0662901	0.701625	0.167277	0.295059	0.101046	0.281431	0.114028	0.475466	0.100113	0.223319	0.0875264	0.360438	0.130633	0.239877	0.0850321	0.525212	0.0850321	0.525212	0.120277	0.223448	0.0701867	0.272751	0.205317	0.17746	0.0874813	0.397422	0.349524	0.189814	0.172067	0.198636	0.136371	0.358812	0.083241	0.559214	0.155672	0.165456	0.12953	0.529619	0.0499834	0.213499	0.206258	0.315146	0.136365	0.178456	0.169702	0	0.169704
3.014	0.0160282	0.553511	0.0598036	0.762072	0.116823	0.309015	0.0861338	0.287075	0.140461	0.494247	0.10998	0.222353	0.0742498	0.352312	0.122548	0.266636	0.0986026	0.565506	0.0986026	0.565506	0.0618305	0.107415	0.0400953	0.262927	0.200259	0.181787	0.0646712	0.357253	0.336147	0.236576	0.192355	0.192004	0.153546	0.321086	0.116551	0.5405	0.117287	0.168201	0.0910797	0.548156	0.0903055	0.212763	0.167204	0.268112	0.19015	0.155604	0.220234	0.0136208	0.180176
3.151	0.0245979	0.51718	0.0444183	0.825669	0.0934964	0.31283	0.0758957	0.326657	0.159012	0.480377	0.155271	0.242272	0.0373727	0.377523	0.18536	0.273602	0.11672	0.579149	0.11672	0.579149	0.0700086	0.149494	0.059352	0.22991	0.211372	0.218847	0.0358517	0.317536	0.377744	0.293001	0.27033	0.213579	0.0986265	0.292605	0.0988887	0.56355	0.157889	0.197537	0.0451273	0.637266	0.08015	0.230748	0.125501	0.267317	0.138502	0.237657	0.277942	0.0212813	0.145127
3.288	0.0459978	0.503584	0.0423017	0.840466	0.0722297	0.304628	0.0709992	0.364309	0.093431	0.517352	0.196719	0.280482	0.016757	0.41232	0.188612	0.264117	0.104321	0.535029	0.104321	0.535029	0.096242	0.164233	0.0245326	0.212787	0.190905	0.240597	0.0111551	0.303221	0.312846	0.311301	0.217037	0.230782	0.100259	0.291078	0.0891941	0.535275	0.185426	0.178259	0.0932903	0.623949	0.02962	0.229271	0.172899	0.314466	0.140931	0.35335	0.270521	0.00358091	0.137302
3.425	0.0898546	0.44986	0.0311321	0.853371	0.037417	0.292056	0.0382817	0.428898	0	0.50223	0.167199	0.310476	0.0359123	0.407455	0.166471	0.247036	0.0835395	0.567557	0.0835395	0.567557	0.066265	0.126843	0.0197384	0.269894	0.166519	0.280878	0.0121415	0.294677	0.236692	0.320287	0.167221	0.283809	0.132201	0.285729	0.117977	0.495267	0.187672	0.214796	0.0910976	0.578541	0.0209889	0.265396	0.203006	0.333552	0.187043	0.315645	0.24847	0.0274324	0.156805
3.562	0.0964304	0.445473	0.0379317	0.872837	0	0.280558	0.029379	0.456333	0.0593426	0.525428	0.133991	0.311868	0.0696555	0.396928	0.132561	0.29863	0.0482376	0.576648	0.0482376	0.576648	0.0490779	0.140999	0.0443726	0.368328	0.151707	0.332746	0.0140006	0.298347	0.241437	0.35121	0.122136	0.328932	0.126755	0.27597	0.0808633	0.484435	0.159304	0.204367	0.090017	0.594646	0.0422617	0.282896	0.186324	0.37104	0.171822	0.355948	0.229027	0.0427902	0.123236
3.699	0.0888903	0.487163	0.0564875	0.830533	0.0278624	0.282259	0.0825728	0.525494	0.110668	0.529151	0.186392	0.323725	0.0575621	0.406898	0.103325	0.331304	0.0618654	0.535484	0.0618654	0.535484	0.0954065	0.159938	0.0450354	0.389945	0.149297	0.338259	0.013837	0.316771	0.240284	0.375639	0.126715	0.43147	0.125938	0.261517	0.095542	0.488102	0.11799	0.160382	0.0814121	0.593775	0.0417203	0.308862	0.187953	0.423075	0.152298	0.410665	0.362759	0.0279545	0.0944272
3.836	0.0743004	0.522179	0.0356784	0.73832	0.0521085	0.275791	0.0870241	0.592798	0.117154	0.489866	0.256323	0.354869	0.0451116	0.385875	0.136726	0.389216	0.0726624	0.510461	0.0726624	0.510461	0.0920176	0.197705	0.0771285	0.37461	0.154681	0.333231	0.00521388	0.358382	0.258639	0.377474	0.131026	0.478483	0.111053	0.27151	0.0914282	0.46937	0.107906	0.158687	0.0929271	0.556599	0.0698632	0.35433	0.143607	0.501236	0.131343	0.361228	0.403017	0.0628065	0.0849943
3.973	0.0375752	0.552706	0.0116238	0.703587	0.0428262	0.300493	0.047407	0.627735	0.0814753	0.499821	0.251732	0.392991	0.0589052	0.379422	0.165417	0.407234	0.0817895	0.526798	0.0817895	0.526798	0.103356	0.254215	0.0479562	0.429413	0.129571	0.334761	0.00530934	0.422032	0.264214	0.371214	0.130561	0.466359	0.0681153	0.280098	0.0620842	0.465944	0.139183	0.231096	0.0694173	0.514981	0.0824681	0.315119	0.0760752	0.501691	0.10466	0.354588	0.329414	0.113863	0.030353
4.11	0.0433882	0.598107	0.0138771	0.674182	0.000945186	0.355479	0.0438459	0.616447	0.0717145	0.508718	0.199673	0.41248	0.0721925	0.391529	0.155427	0.361909	0.102148	0.532465	0.102148	0.532465	0.105923	0.261817	0.0287658	0.385966	0.0934375	0.315323	0	0.433903	0.285795	0.370665	0.121748	0.520366	0.0546611	0.304788	0.049819	0.486078	0.177312	0.283977	0.062198	0.444925	0.0649958	0.31916	0.0553264	0.608481	0.10654	0.320422	0.255726	0.171372	0.0354813
4.247	0.0759185	0.61703	0.0208311	0.645925	0.0264703	0.356127	0	0.571792	0.0785322	0.488955	0.151202	0.452229	0.0636008	0.395432	0.132842	0.379726	0.0978077	0.581217	0.0978077	0.581217	0.139532	0.273196	0.028483	0.473408	0.0611688	0.3967	0.0163462	0.391552	0.293587	0.386751	0.084381	0.59719	0.0889862	0.294583	0.0527395	0.490965	0.187477	0.312669	0.0896941	0.411795	0.0483013	0.343243	0.0870562	0.751741	0.110652	0.384983	0.312033	0.236534	0.05193
4.384	0.0678445	0.567939	0.026449	0.608925	0.0549595	0.354786	0.00689961	0.540855	0.0850674	0.514246	0.112237	0.513116	0.0395579	0.415428	0.109993	0.384449	0.0594349	0.612897	0.0594349	0.612897	0.112514	0.37334	0.0046308	0.475085	0.0579387	0.395079	0.0387063	0.36737	0.22313	0.436151	0.104007	0.601231	0.121744	0.314111	0.0727299	0.4829	0.207968	0.341753	0.0940212	0.414274	0.0352444	0.337049	0.0378354	0.886139	0.117876	0.355278	0.327922	0.299337	0.0381337
4.521	0.0682858	0.566075	0.0312555	0.568369	0.0557608	0.322295	0.0289339	0.507061	0.100194	0.529901	0.0881536	0.571427	0.0245918	0.429453	0.0673583	0.402986	0.11342	0.642245	0.11342	0.642245	0.0857673	0.279829	0.0166143	0.430508	0.0760879	0.371581	0.0375245	0.350456	0.201802	0.507023	0.107732	0.610688	0.0975898	0.347331	0.191187	0.625007	0.184353	0.382978	0.0800759	0.433914	0.00630772	0.319788	0.0722079	0.971571	0.110328	0.346376	0.291525	0.361086	0.0170224
4.658	0.0664771	0.613996	0.0343114	0.554413	0.0695996	0.355231	0.0182506	0.481197	0.115445	0.532724	0.102457	0.674108	0.0208449	0.457594	0.0622964	0.461295	0.0949541	0.593329	0.0949541	0.593329	0.0889928	0.206545	0.0372099	0.44854	0.0896318	0.371761	0.0477749	0.328986	0.190816	0.525452	0.0780449	0.620216	0.123471	0.338798	0.132374	0.680463	0.136791	0.433347	0.0611353	0.437257	0	0.283146	0.0988573	0.958166	0.0696221	0.392483	0.247308	0.449953	0.00613826
4.795	0.0968227	0.637361	0.0364589	0.566142	0.043119	0.324213	0.0104607	0.494986	0.120241	0.546723	0.104744	0.741453	0.0267291	0.476202	0.0210037	0.455069	0.0332488	0.589562	0.0332488	0.589562	0.136726	0.232193	0.042751	0.505731	0.088054	0.374639	0.0551071	0.313454	0.162601	0.538108	0.0881635	0.573702	0.180027	0.402509	0.0903201	0.720975	0.156869	0.499463	0.0952857	0.413323	0.0324269	0.262837	0.083804	0.995088	0.0877576	0.364621	0.15121	0.509393	0.0105115
4.932	0.112475	0.642766	0.0577487	0.572277	0.045708	0.289326	0.0371689	0.48677	0.105991	0.573855	0.104001	0.837369	0.0390196	0.478814	0	0.453213	0.0578566	0.488867	0.0578566	0.488867	0.169583	0.277056	0.0474878	0.468072	0.101598	0.397294	0.0684168	0.286057	0.124247	0.587569	0.120245	0.543446	0.097116	0.516006	0.0264236	0.71133	0.127761	0.558336	0.115567	0.405924	0.0609063	0.245029	0.0630552	0.948849	0.0888588	0.406139	0.098593	0.552702	0.030304
5.069	0.144695	0.641088	0.0907107	0.575708	0.0506188	0.287954	0.0449588	0.457834	0.0816982	0.620231	0.11345	0.71022	0.0384334	0.497851	0.0167385	0.467748	0.0367601	0.433317	0.0367601	0.433317	0.195724	0.276478	0.0557154	0.45177	0.0902661	0.398129	0.0672167	0.277956	0.108912	0.64588	0.0746699	0.549515	0.068242	0.516565	0.0113186	0.734715	0.0461619	0.597407	0.101344	0.446105	0.0532266	0.271933	0.0827845	0.98316	0.00096992	0.358189	0.0952272	0.603206	0.0469586
5.206	0.0987785	0.658102	0.0705631	0.55717	0.0684541	0.282922	0.0333852	0.467551	0.0555621	0.638732	0.137595	0.660295	0.0437845	0.512462	0.0444154	0.458381	0.0857183	0.428174	0.0857183	0.428174	0.152602	0.270398	0.0982543	0.516461	0.0853517	0.374396	0.0499659	0.247757	0.102972	0.588805	0	0.556108	0.0500122	0.547598	0	0.715397	0.0604904	0.627799	0.0973753	0.465761	0.0289156	0.300951	0.0569553	0.817066	0.0513603	0.397803	0.182162	0.651719	0.128952
5.343	0.0591712	0.727858	0.0268944	0.550072	0.0624901	0.309707	0.0509681	0.544714	0.0376063	0.626151	0.0792825	0.60524	0.0625668	0.529232	0.0728421	0.479915	0.0999523	0.40716	0.0999523	0.40716	0.10456	0.265818	0.0712384	0.501837	0.0916999	0.337777	0.042952	0.259416	0.0831943	0.535867	0.000738676	0.584222	0.0510396	0.573048	0.00753229	0.667004	0.0867926	0.630777	0.0893758	0.448939	0.0287106	0.329448	0.0463787	0.749924	0.0808924	0.403878	0.17788	0.685483	0.0159291
5.48	0.0634861	0.802727	0.0202358	0.634864	0.0607385	0.294695	0.0271533	0.596799	0.0383495	0.616362	0.0327891	0.582874	0.0696448	0.55856	0.091971	0.491386	0.149385	0.433614	0.149385	0.433614	0.126499	0.228561	0.054328	0.412727	0.0717545	0.373751	0.053007	0.313663	0.0734985	0.542348	0.00989571	0.66291	0.0609285	0.524024	0.021085	0.64422	0.0800367	0.594538	0.0861428	0.458024	0.0162371	0.373093	0.0427165	0.637565	0	0.518505	0.145555	0.649785	0.0240431
5.617	0.071571	0.786228	0.0322433	0.695889	0.0493243	0.247061	0.0420654	0.622591	0.0547545	0.595616	0.0110708	0.583525	0.0621617	0.591931	0.0731937	0.511987	0.128329	0.3864	0.128329	0.3864	0.12318	0.222236	0.0678492	0.413691	0.0782093	0.410462	0.0651212	0.26827	0.0509491	0.525896	0.0191801	0.722407	0.082883	0.417764	0.0201923	0.605191	0.0917397	0.564872	0.0866809	0.517686	0.0121424	0.437594	0.112077	0.599278	0.046051	0.544272	0.170789	0.621221	0.00681484
5.754	0.0631537	0.721217	0.0561436	0.694578	0.037489	0.223249	0.0718895	0.614732	0.0538825	0.569122	0	0.592334	0.0558992	0.61873	0.0428394	0.540793	0.145862	0.342356	0.145862	0.342356	0.0478689	0.241261	0.0750296	0.443198	0.0800588	0.431819	0.0616028	0.257279	0.00508856	0.539737	0.0211605	0.69154	0.0928799	0.536112	0.0134899	0.615139	0.0841814	0.551409	0.100604	0.556646	0.0262769	0.468373	0.109434	0.501236	0.0299867	0.539243	0.137974	0.593675	0.0450024
5.891	0.0509065	0.676022	0.0464379	0.674955	0.0189243	0.245749	0.0754506	0.572149	0.0722546	0.567475	0.0105183	0.604248	0.06779	0.624312	0.0222516	0.571741	0.155979	0.317859	0.155979	0.317859	0.0737289	0.284506	0.0263045	0.474013	0.0710509	0.350693	0.0577163	0.266325	0	0.524592	0.0509177	0.712011	0.0166442	0.471871	0.0648925	0.692095	0.0773305	0.531398	0.128252	0.56775	0.0456468	0.466674	0.0656979	0.48158	0.0768763	0.592722	0.232416	0.595683	0.0328289
6.028	0.0662646	0.680401	0.0158218	0.629155	0.0172907	0.274958	0.078344	0.528281	0.0846265	0.55773	0.0206545	0.616469	0.0863431	0.615677	0.0335766	0.60198	0.116371	0.40128	0.116371	0.40128	0.0809594	0.262712	0.0415181	0.445071	0.0536639	0.330957	0.0681304	0.286292	0.0525994	0.534753	0.084069	0.740641	0.0990346	0.470688	0.142104	0.720882	0.0733899	0.531558	0.120073	0.593444	0.0608011	0.425025	0.0654986	0.495783	0.168261	0.606738	0.229067	0.563009	0.0278428
6.165	0.0841832	0.716693	0.0141109	0.633786	0.0320233	0.248815	0.0994879	0.541427	0.0672206	0.556178	0.0140141	0.614595	0.0947269	0.56029	0.082556	0.635369	0.0809374	0.365211	0.0809374	0.365211	0.0609576	0.276271	0.0844238	0.380604	0.0355148	0.310735	0.0720715	0.29428	0.0904992	0.545263	0.07616	0.676931	0.15477	0.529146	0.137959	0.701174	0.0616061	0.500056	0.121271	0.638228	0.0519493	0.407388	0.0604125	0.51771	0.142871	0.616793	0.245258	0.535631	0.0336624
6.302	0.0614812	0.719556	0.0221099	0.659726	0.0396413	0.286187	0.119742	0.548643	0.0649315	0.549576	0.0100329	0.574009	0.0718673	0.519368	0.0746877	0.662865	0.0576221	0.434678	0.0576221	0.434678	0	0.321511	0.0556536	0.327403	0.0431102	0.313835	0.0635166	0.29659	0.0392856	0.604721	0.0550696	0.651649	0.18773	0.505673	0.158707	0.655177	0.0756403	0.514716	0.0829815	0.692812	0.045363	0.369889	0.0785129	0.504643	0.208285	0.593206	0.198183	0.605582	-0.011747
6.439	0.0301931	0.710022	0.0263785	0.665723	0.047773	0.348993	0.125528	0.517135	0.0674088	0.543605	0.0374054	0.550995	0.0336312	0.515498	0.058453	0.683391	0.0703921	0.450217	0.0703921	0.450217	0.0833074	0.437397	0.0207944	0.365529	0.0292252	0.346056	0.0676804	0.276655	0.0434062	0.750912	0.084935	0.628671	0.251408	0.517713	0.131171	0.663552	0.0734611	0.530356	0.0673054	0.707686	0.0671982	0.3585	0.0823802	0.518391	0.227259	0.576781	0.11946	0.634915	-0.00126001
6.576	0	0.707279	0.038236	0.660051	0.0963422	0.352265	0.123303	0.485841	0.0717591	0.566132	0.0847404	0.541706	0.0165278	0.51806	0.0641887	0.683282	0.0479403	0.450677	0.0479403	0.450677	0.0966014	0.533994	0.0429675	0.385116	0.0440537	0.35854	0.0643666	0.358972	0.0659873	0.784235	0.0713395	0.592451	0.303704	0.507622	0.15698	0.649294	0.0100366	0.534142	0.0643011	0.713579	0.0931177	0.3805	0.0541075	0.53032	0.271108	0.4813	0.105438	0.619072	-0.0323876
6.713	0.023857	0.739974	0.0572945	0.67076	0.0843578	0.399249	0.133986	0.483197	0.0919	0.596953	0.102911	0.507135	0.0140121	0.531346	0.107005	0.678926	0.0383328	0.463666	0.0383328	0.463666	0.153293	0.628148	0.0459589	0.372836	0.0542982	0.363793	0.0962499	0.448732	0.0478124	0.869217	0.0262485	0.560531	0.335782	0.475117	0.227	0.64052	0	0.559281	0.0432216	0.733242	0.126864	0.417404	0.0311204	0.57758	0.23905	0.486915	0.107147	0.587661	-0.0362314
6.85	0.0401957	0.766269	0.0647776	0.679562	0.0656699	0.489059	0.166258	0.473552	0.0985888	0.594254	0.0941073	0.495994	0.00846376	0.549415	0.112008	0.66308	0.044326	0.41877	0.044326	0.41877	0.148527	0.713489	0.0196279	0.307062	0.0224772	0.384878	0.118078	0.478541	0.0282886	0.944064	0.0243572	0.557104	0.166404	0.42043	0.260503	0.611908	0.0497891	0.593965	0.0469568	0.748005	0.16819	0.392555	0	0.543044	0.192095	0.349078	0.176325	0.524426	-0.0126001
6.987	0.0389808	0.793487	0.0459308	0.652967	0.0840599	0.492076	0.146672	0.463621	0.09573	0.62294	0.103619	0.50897	0.00333114	0.559611	0.0741838	0.652193	0.051423	0.410362	0.051423	0.410362	0.13787	0.839448	0.0746187	0.33566	0	0.387153	0.128665	0.475246	0.0129436	0.969898	0.0432635	0.547933	0.0968439	0.47879	0.28013	0.600442	0.0303188	0.590553	0.0609066	0.785412	0.116556	0.473737	0.0313254	0.572583	0.112369	0.384774	0.272794	0.567822	-0.0303187
7.124	0.0275508	0.813661	0.0320316	0.635108	0.0919604	0.453496	0.14044	0.456905	0.0966763	0.645337	0.118061	0.501406	0.00787748	0.561237	0.0259778	0.628564	0.0468194	0.426234	0.0468194	0.426234	0.161489	0.905699	0.0722193	0.322082	0.022296	0.448761	0.0937316	0.494438	0.029484	0.988144	0.0458871	0.544649	0.0882216	0.367499	0.279314	0.543526	0.0299485	0.564428	0.0546649	0.826646	0.0950415	0.438812	0.0215576	0.491693	0.0749971	0.419129	0.196981	0.583658	-0.013463
7.261	0.00883128	0.764886	0.0221232	0.651178	0.0894588	0.464523	0.150011	0.474195	0.098247	0.63745	0.08457	0.467155	0.00671558	0.553837	0.00359729	0.644481	0.0399397	0.414041	0.0399397	0.414041	0.21903	0.956935	0.101758	0.332893	0.0361864	0.471689	0.0916997	0.513352	0.0553765	0.974777	0.080331	0.514623	0.0640387	0.281972	0.255995	0.538221	0.0748664	0.574257	0	0.927822	0.157283	0.396745	0.0917379	0.506348	0.0877879	0.460249	0.143726	0.599729	-0.0247344
7.398	0.0418737	0.731531	0.00913237	0.652219	0.10075	0.497421	0.198086	0.508561	0.112581	0.592168	0.0580806	0.441607	0	0.548898	0.022152	0.660728	0.0459101	0.404471	0.0459101	0.404471	0.266092	0.976691	0.0699923	0.407211	0.0899569	0.447211	0.10205	0.503931	0.037831	0.931509	0.106917	0.497019	0.071249	0.368956	0.273612	0.523344	0.0708926	0.578437	0.0116585	1.04815	0.229937	0.408379	0.0663131	0.459657	0.0923546	0.551057	0.0895834	0.604545	-0.0398398
7.535	0.063655	0.669438	0.0155969	0.673979	0.112981	0.513409	0.238593	0.528924	0.106957	0.602871	0.0544867	0.428155	0.00297404	0.546321	0.0244077	0.658376	0.0572161	0.441013	0.0572161	0.441013	0.289127	0.926241	0	0.404703	0.130642	0.491617	0.0807037	0.468705	0.066876	0.865993	0.0795223	0.508926	0.0744953	0.399905	0.304714	0.516401	0.0678066	0.516205	0.0488849	1.09593	0.202672	0.368301	0.0534981	0.438751	0.0975023	0.571651	0.103861	0.567434	-0.00680503
7.672	0.0854254	0.605892	0.0180443	0.73207	0.148774	0.52785	0.238148	0.585581	0.0857809	0.615712	0.0802429	0.404431	0.030929	0.53644	0.010704	0.650127	0.0598009	0.535343	0.0598009	0.535343	0.304961	0.785647	0.00136096	0.479941	0.135135	0.470269	0.0908769	0.434646	0.0403171	0.901643	0.0832284	0.510059	0.0407191	0.367769	0.286958	0.562858	0.0734659	0.531235	0.0589516	1.18941	0.0894224	0.448583	0.0809563	0.526684	0.136006	0.501496	0.107494	0.539155	0.013311
7.809	0.0682586	0.620108	0.0433821	0.758297	0.156069	0.505936	0.248386	0.621234	0.0751778	0.595725	0.0982382	0.380869	0.0638033	0.53002	0.0168088	0.64561	0.0628376	0.564932	0.0628376	0.564932	0.331017	0.713702	0.0426317	0.529731	0.113889	0.453549	0.0923406	0.452078	0.0398569	0.837014	0.0954165	0.54169	0.00283814	0.417692	0.247305	0.594383	0.10368	0.521845	0.0333478	1.23003	0.0164999	0.420873	0.0701746	0.567242	0.155111	0.515992	0.148487	0.546186	0.00584409
7.946	0.0842649	0.670771	0.0278072	0.802278	0.126973	0.542427	0.257511	0.617161	0.0781606	0.5642	0.0726524	0.362614	0.0724643	0.551075	0.0316784	0.64233	0.0549858	0.588763	0.0549858	0.588763	0.379152	0.642843	0.0863459	0.575957	0.114214	0.477855	0.100546	0.411784	0.072229	0.736773	0.0750456	0.54428	0.0173056	0.415288	0.240966	0.590689	0.110374	0.513857	0.0258818	1.19086	0.0217879	0.419839	0.0919429	0.600757	0.0903491	0.550847	0.106777	0.547973	-0.0155074
8.083	0.0655781	0.706823	0	0.866532	0.0746543	0.593904	0.257066	0.585153	0.069138	0.560478	0.0521579	0.386301	0.0564855	0.596507	0.0262473	0.626326	0.0517032	0.574156	0.0517032	0.574156	0.329248	0.523067	0.136193	0.564513	0.118841	0.486527	0.0821492	0.416568	0.0852149	0.670376	0.0570436	0.549174	0.0329834	0.392348	0.235277	0.613917	0.0957136	0.505392	0.0507055	1.1734	0.0255252	0.45687	0.140964	0.556678	0.0828019	0.633571	0.200859	0.566912	-0.015027
8.22	0.0374008	0.715398	0.00126998	0.848217	0.0510811	0.569134	0.216336	0.546786	0.0683205	0.584443	0.0619688	0.41896	0.0314779	0.616161	0.0182735	0.626701	0.0785699	0.597507	0.0785699	0.597507	0.272496	0.47367	0.166342	0.46176	0.124006	0.528999	0.105146	0.444619	0.0872144	0.646469	0.0378635	0.544118	0.0408551	0.380939	0.209132	0.573037	0.0524668	0.48857	0.0562029	1.10327	0.0667199	0.471889	0.041902	0.706185	0.103236	0.626345	0.106669	0.613661	-0.00943782
8.357	0.0336253	0.772597	0.0199757	0.863439	0.0883184	0.566606	0.251279	0.618161	0.0796569	0.579943	0.0332693	0.455631	0.0346918	0.630557	0.0383633	0.653035	0.116983	0.639714	0.116983	0.639714	0.171423	0.439795	0.128584	0.431743	0.136916	0.533457	0.148302	0.460994	0.090113	0.618881	0.0428559	0.532322	0.0492429	0.347355	0.21465	0.613093	0.118412	0.428587	0.059391	1.01471	0.0700735	0.481555	0.0272531	0.726293	0.149383	0.645364	0.0647244	0.598153	-0.00892793
8.494	0.0624019	0.809948	0.0468877	0.882935	0.0894125	0.614797	0.255731	0.640667	0.0798551	0.542652	0.0362642	0.513118	0.0772291	0.671467	0.0603337	0.647697	0.137885	0.650287	0.137885	0.650287	0.111543	0.413096	0.140091	0.502554	0.147682	0.530993	0.190082	0.469925	0.108002	0.636227	0.0504974	0.528729	0.0387441	0.342757	0.322861	0.547475	0.0682956	0.496621	0.0689465	0.983261	0.0924343	0.554693	0.0272531	0.863646	0.11392	0.59283	0.0961043	0.598936	0.0355009
8.631	0.0801789	0.796695	0.0532993	0.854755	0.0625467	0.66896	0.231471	0.660672	0.0835414	0.532498	0.0681652	0.542001	0.0866842	0.682044	0.0647805	0.597914	0.128986	0.648463	0.128986	0.648463	0.134934	0.428445	0.143011	0.603912	0.085389	0.538295	0.218865	0.427009	0.0828346	0.633376	0.0755678	0.541025	0.0547315	0.408333	0.442359	0.524225	0.0490959	0.558781	0.143745	0.967941	0.0744416	0.587989	0.0311204	0.818542	0.124317	0.629424	0.120234	0.660718	0.0636722
8.768	0.0617808	0.794116	0.0257038	0.861958	0.0766577	0.709256	0.228577	0.746909	0.0939166	0.568754	0.0601254	0.558552	0.0830653	0.672333	0.0607965	0.552634	0.13061	0.627124	0.13061	0.627124	0.165023	0.441387	0.152702	0.615917	0.0529017	0.584491	0.217901	0.393902	0.0984811	0.592197	0.0730334	0.550221	0.0717228	0.413085	0.485005	0.54474	0.104335	0.60669	0.123042	0.913212	0.0662941	0.701924	0.0451542	0.932489	0.160749	0.621738	0.0906256	0.65945	0.0427325
8.905	0.0490705	0.825823	0.0117296	0.857792	0.0898132	0.736673	0.194079	0.81114	0.10992	0.595082	0.0423057	0.564917	0.0629026	0.688724	0.0531918	0.541681	0.135797	0.649015	0.135797	0.649015	0.169854	0.452533	0.232777	0.584365	0.0335746	0.639229	0.18935	0.375219	0.0976665	0.553047	0.0812862	0.58386	0.0375901	0.466232	0.36028	0.53793	0.0724119	0.711145	0.0784482	0.833134	0.0748463	0.888459	0.0376304	0.934535	0.18824	0.542763	0.0773105	0.609076	0.0152329
9.042	0.0604515	0.899123	0.0126336	0.853353	0.0943439	0.749882	0.145782	0.891375	0.133713	0.558083	0.0352676	0.549573	0.0441736	0.711676	0.0405779	0.552948	0.0911168	0.595816	0.0911168	0.595816	0.195583	0.388939	0.265083	0.586174	0.0414419	0.713401	0.168053	0.340782	0.0728479	0.547423	0.120863	0.594062	0.0301124	0.476312	0.359782	0.584553	0.0921718	0.76356	0.0803853	0.811621	0.0107073	0.898883	0.0252198	0.731404	0.0729259	0.540753	0.0723387	0.593246	0.022337
9.179	0.101552	0.92199	0.0153588	0.883889	0.132121	0.796566	0.155798	0.996046	0.153769	0.537538	0.0536553	0.489245	0.0327624	0.730891	0.0332544	0.570123	0.10073	0.573199	0.10073	0.573199	0.21145	0.333189	0.186164	0.580011	0.0403386	0.839684	0.128106	0.295775	0.0665533	0.569786	0.147359	0.56555	0.00902575	0.575209	0.287084	0.667084	0.0622138	0.95825	0.0737355	0.822323	0.0355387	0.822824	0.0128149	0.744698	0.108485	0.603532	0.0852381	0.595937	-0.000127472
9.316	0.09375	0.886026	0.0238473	0.898166	0.134365	0.843766	0.172935	1.076	0.15257	0.53232	0.0674009	0.448937	0.0547213	0.765403	0.0369747	0.590486	0.124863	0.593421	0.124863	0.593421	0.257358	0.332	0.137342	0.589232	0.00975417	0.884183	0.115983	0.280531	0.10888	0.527081	0.10735	0.533668	0	0.639597	0.307805	0.658826	0.0633485	0.954107	0.109841	0.805068	0.0431238	0.803097	0.022372	0.758443	0.0977952	0.549674	0.044188	0.63348	0.0012404
9.453	0.0695715	0.789493	0.00573254	1.0126	0.112241	0.834696	0.1785	1.09007	0.150465	0.50053	0.0740569	0.447345	0.0659885	0.79356	0.0415914	0.611812	0.227915	0.576069	0.227915	0.576069	0.342584	0.322613	0.0569394	0.630154	0.0357333	0.929432	0.0721852	0.255612	0.127378	0.525019	0.0901057	0.499536	0.0186379	0.676027	0.27572	0.681057	0.0631586	1.00658	0.130808	0.743444	0.0412262	0.779935	0.0939763	0.706866	0.0638935	0.502669	0	0.624892	0.00569701
9.59	0.102816	0.765865	0.0284995	1.0944	0.102244	0.819332	0.166258	1.01834	0.165616	0.513871	0.0772067	0.445748	0.0701565	0.77276	0.0401736	0.635811	0.0243047	0.569969	0.0243047	0.569969	0.535521	0.344375	0.0907469	0.565792	0.0622934	0.935607	0.0850539	0.291715	0.106045	0.621793	0.102039	0.489347	0.0607502	0.832884	0.20775	0.67609	0.076305	0.970645	0.135736	0.732314	0.0781579	0.708617	0.0553264	0.618933	0.121048	0.481385	0.0617858	0.700684	0
9.727	0.145174	0.79022	0.0243148	1.13188	0.133133	0.798333	0.205875	0.925527	0.161623	0.537841	0.0551993	0.449404	0.072848	0.771298	0.0315964	0.65381	0.031842	0.603271	0.031842	0.603271	0.744268	0.320736	0.0872208	0.496828	0.0851011	0.892059	0.103468	0.285805	0.0990418	0.691111	0.0838206	0.45911	0.00637526	0.876499	0.179335	0.636793	0.0939617	1.00164	0.194558	0.738435	0.0856483	0.589749	0.0630552	0.585759	0.130535	0.444537	0.123714	0.821514	0.018253
9.864	0.196397	0.807022	0.0313217	1.16389	0.152283	0.752555	0.217226	0.788349	0.133822	0.535409	0.05191	0.459768	0.0474141	0.772906	0.0236636	0.674298	0.121626	0.627207	0.121626	0.627207	0.874338	0.284728	0.096668	0.470979	0.11552	0.856395	0.133961	0.273768	0.0919961	0.723229	0.0520193	0.403967	0.0336918	0.826762	0.160022	0.641089	0.131872	1.00709	0.0981869	0.671932	0.178997	0.480473	0.0646841	0.554403	0.123443	0.520263	0.143482	0.811612	0.049665
10.001	0.17255	0.777403	0.0495776	1.19222	0.186438	0.719437	0.176942	0.604801	0.125394	0.525586	0.0514918	0.441697	0.0686428	0.813215	0.0191875	0.700384	0.0847804	0.632461	0.0847804	0.632461	1.12102	0.274454	0.18498	0.486899	0.101108	0.826144	0.166349	0.296381	0.0801158	0.703564	0.0246756	0.395658	0.0535963	0.797239	0.188572	0.605183	0.134687	0.824199	0.060391	0.659912	0.178104	0.497402	0.104758	0.487036	0.115122	0.46869	0.132752	0.76513	0.0380847
10.138	0.127604	0.753445	0.0476903	1.1434	0.199157	0.694182	0.191186	0.446759	0.142532	0.525262	0.0291384	0.421155	0.0143159	0.771325	0.0192578	0.709677	0.0939361	0.652724	0.0939361	0.652724	1.21825	0.250484	0.312062	0.485396	0.0710296	0.724285	0.191541	0.309918	0.0696636	0.666527	0.0442378	0.421901	0.0696446	0.821159	0.20727	0.602598	0.14528	0.781305	0.0532614	0.656936	0.172027	0.484451	0.0777041	0.417849	0.140608	0.531158	0.111094	0.752389	0.0115411
10.275	0.130933	0.695468	0.057881	1.14246	0.203081	0.712905	0.199644	0.373526	0.149028	0.529304	0.0234687	0.464586	0.0274326	0.787448	0.0333306	0.703586	0.0423988	0.575428	0.0423988	0.575428	1.19237	0.259218	0.456505	0.489092	0.0852824	0.628353	0.231274	0.329357	0.0733821	0.664553	0.064303	0.425958	0.097116	0.894261	0.283266	0.491964	0.125088	0.660479	0.121898	0.61075	0.118937	0.480587	0.118997	0.553497	0.187659	0.60146	0.0969642	0.792941	0.0470812
10.412	0.115771	0.616763	0.0345672	1.08995	0.21054	0.769624	0.210549	0.416894	0.132311	0.541083	0.0263294	0.501035	0.0459431	0.73355	0.045552	0.71287	0.0423988	0.550449	0.0423988	0.550449	1.06647	0.214746	0.529966	0.540219	0.118932	0.574754	0.26558	0.348097	0.0611527	0.653437	0.046562	0.391034	0.104223	0.911258	0.371536	0.429107	0.093335	0.652326	0.10064	0.617385	0.0761604	0.460512	0.132216	0.540773	0.213206	0.570706	0.102061	0.764022	0.0740513
10.549	0.086139	0.515105	0.0168228	1.00563	0.229644	0.825454	0.206988	0.452761	0.129125	0.580155	0.0444486	0.451717	0.0478245	0.773808	0.0434721	0.740967	0.0916143	0.540136	0.0916143	0.540136	0.864288	0.160519	0.575523	0.54896	0.113815	0.523013	0.319078	0.39863	0.0630781	0.65039	0.0584191	0.393816	0.111719	0.911335	0.473238	0.390619	0.0886395	0.62025	0.067135	0.680861	0.154287	0.47832	0.160694	0.526684	0.135359	0.628126	0.0840535	0.616506	0.0596617
10.686	0.108634	0.445418	0.0199051	1.0165	0.243175	0.820231	0.187847	0.454976	0.152962	0.574888	0.0402505	0.418364	0.0768241	0.810567	0.0450598	0.779003	0.0925236	0.566681	0.0925236	0.566681	0.753879	0.133213	0.6055	0.499009	0.109209	0.492845	0.423365	0.456562	0.0942601	0.641556	0.0795923	0.458321	0.140481	0.8595	0.462659	0.361215	0.138946	0.536853	0.131113	0.631917	0.248818	0.480287	0.0756651	0.518505	0.14909	0.671844	0.08255	0.721778	0.0556709
10.823	0.126531	0.41398	0.0206856	0.994222	0.226922	0.78783	0.15602	0.44333	0.177507	0.550757	0.0194153	0.401961	0.0710306	0.746664	0.0470577	0.798544	0.0700775	0.547092	0.0700775	0.547092	0.673153	0.104378	0.6657	0.477861	0.108085	0.486666	0.612778	0.495455	0.102041	0.598444	0.0785671	0.489095	0.15986	0.853496	0.441763	0.320566	0.143613	0.587434	0.18098	0.653808	0.237086	0.548042	0.134454	0.614047	0.0861714	0.777318	0.092243	0.827906	0.105419
10.96	0.116615	0.380663	0.0408509	1.0143	0.243817	0.761387	0.149566	0.452118	0.198416	0.558312	0.0433177	0.389127	0.0969282	0.731218	0.0444447	0.784892	0.117623	0.616797	0.117623	0.616797	0.684892	0.106048	0.667335	0.509428	0.144602	0.482543	0.893105	0.49377	0.0971005	0.565581	0.0862595	0.499402	0.11315	0.855699	0.437891	0.321237	0.146813	0.526521	0.163932	0.621635	0.374736	0.581692	0.172899	0.5026	0.185098	0.724382	0.067236	0.801675	0.192203
11.097	0.123017	0.383018	0.0612499	1.01316	0.247757	0.799605	0.172935	0.476982	0.268263	0.553481	0.0854065	0.394035	0.0792651	0.682737	0.0335532	0.766116	0.163876	0.6454	0.163876	0.6454	0.640006	0.154322	0.652753	0.557599	0.17138	0.474223	1.08763	0.440956	0.0992904	0.555857	0.115558	0.544678	0.106212	0.790377	0.46632	0.280427	0.198511	0.533649	0.180559	0.640669	0.497101	0.542864	0.21053	0.461588	0.23662	0.719669	0.0907281	0.769939	0.190203
11.234	0.126618	0.383628	0.0652407	0.987698	0.237514	0.799812	0.202982	0.495129	0.298729	0.566257	0.091701	0.392851	0.0413221	0.662207	0.0335766	0.750809	0.20476	0.675546	0.20476	0.675546	0.658654	0.148875	0.819559	0.587767	0.192461	0.497148	1.19135	0.370132	0.096799	0.583936	0.119086	0.5781	0.148709	0.729238	0.451098	0.273252	0.197495	0.557955	0.216628	0.735685	0.757862	0.537555	0.352308	0.491693	0.37104	0.663632	0.0492111	0.802659	0.180897
11.371	0.133259	0.380749	0.136712	0.961617	0.279487	0.761562	0.247718	0.514777	0.283984	0.587191	0.0923	0.361401	0.0319736	0.636231	0.0711958	0.738103	0.204154	0.67263	0.204154	0.67263	0.636463	0.160775	1.02397	0.595651	0.176348	0.529966	1.23878	0.317193	0.111451	0.62675	0.116908	0.554189	0.185807	0.704678	0.416384	0.321785	0.208685	0.558256	0.231793	0.682989	0.740368	0.4665	0.425741	0.507598	0.411484	0.67421	0.0461642	0.790116	0.0941232
11.508	0.168726	0.355198	0.144147	0.941965	0.329182	0.736531	0.311818	0.501559	0.283692	0.599497	0.0886287	0.348303	0.0452875	0.640092	0.120609	0.727894	0.149322	0.642547	0.149322	0.642547	0.628831	0.13323	1.16797	0.510965	0.186662	0.517592	1.24748	0.268513	0.114937	0.65645	0.158631	0.578628	0.245933	0.68114	0.427075	0.333176	0.242593	0.585882	0.198445	0.672423	0.822679	0.439253	0.388515	0.564856	0.425765	0.585369	0.0472121	0.762309	0.185653
11.645	0.200319	0.372061	0.144385	0.858283	0.298011	0.702641	0.422212	0.473552	0.305136	0.617478	0.104243	0.36924	0.0605361	0.601455	0.172969	0.724057	0.0839684	0.618208	0.0839684	0.618208	0.61051	0.115095	1.3435	0.474972	0.213185	0.511656	1.27813	0.265667	0.115524	0.658265	0.201149	0.683477	0.315634	0.705413	0.443561	0.304872	0.332662	0.504401	0.173703	0.686675	0.769683	0.34076	0.536804	0.516686	0.39889	0.594023	0.0821115	0.836481	0.321337
11.782	0.0760438	0.397604	0.15469	0.767549	0.245019	0.67606	0.491208	0.428183	0.328497	0.625225	0.0997615	0.371189	0.0687387	0.587204	0.19655	0.73348	0.0191178	0.618253	0.0191178	0.618253	0.682647	0.150093	1.40355	0.471608	0.245874	0.490411	1.33348	0.219977	0.128023	0.714257	0.226831	0.790101	0.419726	0.78714	0.414173	0.36099	0.44145	0.487061	0.109128	0.713357	0.701134	0.314038	0.553281	0.588714	0.428099	0.590023	0.0776124	0.786706	0.489766
11.919	0.0829737	0.364368	0.174401	0.665092	0.198638	0.688672	0.491653	0.42804	0.357869	0.639645	0.0758848	0.411868	0.0737754	0.584272	0.182682	0.743371	0	0.616395	0	0.616395	0.714692	0.154926	1.30302	0.424619	0.402751	0.469092	1.22697	0.19005	0.116968	0.742322	0.235077	0.877422	0.492232	0.799541	0.503649	0.358633	0.423741	0.427982	0.0930258	0.780503	0.530926	0.322077	0.465809	0.566672	0.373697	0.634767	0.113696	0.781669	0.351204
12.056	0.0922245	0.378	0.197146	0.619024	0.154106	0.723734	0.473847	0.452404	0.424317	0.649288	0.102679	0.465392	0.034388	0.611935	0.168112	0.728548	0.030418	0.65067	0.030418	0.65067	0.61416	0.0890091	1.24837	0.366912	0.579424	0.451316	1.12093	0.132386	0.146727	0.761594	0.211783	0.881234	0.585858	0.753684	0.494403	0.351903	0.659203	0.438402	0.121145	0.774556	0.657285	0.312346	0.489406	0.458066	0.490143	0.497055	0.140104	0.79018	0.238044
12.193	0.0926168	0.415673	0.255499	0.641444	0.157743	0.752986	0.517471	0.472838	0.497963	0.632225	0.1158	0.461928	0.036392	0.558531	0.160941	0.692375	0.0688194	0.697814	0.0688194	0.697814	0.584608	0.118466	1.32908	0.358824	0.736792	0.489464	1.01573	0.0845861	0.213175	0.790394	0.186764	0.839462	0.656431	0.7741	0.503582	0.323706	0.912498	0.464437	0.0872638	0.754762	0.661443	0.253159	0.513817	0.407736	0.491987	0.495359	0.0907965	0.703143	0.22313
12.33	0.0824616	0.427168	0.295199	0.714618	0.160599	0.76954	0.527932	0.452118	0.511604	0.59945	0.137017	0.474887	0.0632703	0.495663	0.119566	0.669153	0.0647191	0.652688	0.0647191	0.652688	0.580524	0.157799	1.3485	0.397389	0.804959	0.480047	1.00519	0.111246	0.252259	0.771112	0.193132	0.777595	0.779972	0.740875	0.523393	0.377152	1.17046	0.435555	0.0529026	0.707857	0.73312	0.270148	0.382819	0.390126	0.616758	0.534593	0.084418	0.671588	0.32724
12.467	0.10184	0.396969	0.206305	0.702736	0.124164	0.775884	0.394836	0.45862	0.490323	0.574182	0.162825	0.508441	0.108974	0.492902	0.0805289	0.645201	0.0503421	0.535503	0.0503421	0.535503	0.605618	0.184976	1.18043	0.394177	0.890241	0.454496	1.01927	0.121516	0.284859	0.671368	0.191215	0.680361	0.836791	0.729589	0.564042	0.426479	1.46965	0.421849	0.0543017	0.755077	0.647356	0.281719	0.263213	0.373995	0.603321	0.571628	0.0929093	0.716784	0.509598
12.604	0.120794	0.401219	0.152821	0.71248	0.0748084	0.769158	0.340752	0.517135	0.52074	0.56662	0.150164	0.502551	0.130927	0.522095	0.0783904	0.605385	0.0735088	0.516926	0.0735088	0.516926	0.687455	0.168576	1.07518	0.338034	1.02193	0.445019	0.974172	0.0921663	0.353713	0.60116	0.211688	0.564334	0.898142	0.722629	0.706021	0.409729	1.66856	0.401262	0.0983976	0.789239	0.56423	0.264914	0.290062	0.442161	0.566954	0.596098	0.0733069	0.686785	0.495767
12.741	0.114115	0.424408	0.185562	0.738552	0.0416293	0.740196	0.361451	0.565076	0.593272	0.564339	0.131446	0.468326	0.142722	0.521339	0.068782	0.569753	0.0836138	0.598367	0.0836138	0.598367	0.688024	0.19153	1.05931	0.320576	0.948223	0.396026	0.934089	0.114694	0.443488	0.616413	0.22927	0.48851	0.994582	0.728484	0.849592	0.402941	1.81915	0.414645	0.0958417	0.853106	0.567642	0.232525	0.383224	0.464994	0.490658	0.588199	0.175539	0.610823	0.419956
12.878	0.112666	0.462028	0.195334	0.736728	0.040756	0.700519	0.332739	0.584367	0.756148	0.534747	0.121356	0.411497	0.171546	0.472068	0.100712	0.570718	0.110109	0.616537	0.110109	0.616537	0.627123	0.218218	1.08276	0.369915	0.906669	0.365423	0.8846	0.126781	0.497415	0.598678	0.2086	0.439059	1.01213	0.75483	0.877621	0.459129	2.0065	0.381513	0.161892	1.0393	0.512307	0.209985	0.420245	0.426937	0.593505	0.552442	0.1245	0.637931	0.329412
13.015	0.0873758	0.480802	0.186753	0.776723	0.061509	0.696726	0.299799	0.564647	0.858934	0.554707	0.141112	0.361731	0.189992	0.431875	0.137933	0.558322	0.149797	0.63573	0.149797	0.63573	0.530181	0.239534	1.0692	0.373605	0.884986	0.357535	0.85268	0.134604	0.458706	0.582717	0.181485	0.37219	1.0439	0.649996	0.819184	0.45405	2.15721	0.366056	0.112814	1.02007	0.462303	0.175504	0.673496	0.469085	0.742727	0.512953	0.100917	0.692069	0.29395
13.152	0.064118	0.463138	0.178304	0.748771	0.0966042	0.735623	0.307367	0.571506	0.840354	0.575193	0.184171	0.304365	0.180494	0.398197	0.10537	0.513675	0.137347	0.566152	0.137347	0.566152	0.433556	0.248509	1.05658	0.325996	0.747521	0.368502	0.87805	0.130473	0.423007	0.580029	0.160261	0.321371	1.15254	0.574746	0.886513	0.408043	2.39626	0.397811	0.122629	1.00726	0.446812	0.189994	1.07116	0.568947	0.670579	0.424743	0.127775	0.626228	0.33302
13.289	0.0495064	0.448645	0.173982	0.700281	0.225566	0.750828	0.291342	0.582652	0.843406	0.598978	0.255781	0.253837	0.175692	0.364319	0.0885144	0.502807	0.323584	0.565218	0.323584	0.565218	0.358329	0.259195	0.97964	0.292114	0.73128	0.413106	1.14992	0.171606	0.401399	0.585023	0.130045	0.307338	1.33277	0.619009	1.03554	0.390246	2.33023	0.401451	0.137171	1.00921	0.461099	0.179272	1.36042	0.630748	0.895216	0.429266	0.139962	0.524737	0.355524
13.426	0.0611053	0.477705	0.213987	0.610539	0.342805	0.733139	0.306031	0.584795	0.892051	0.613344	0.295417	0.225645	0.202762	0.344076	0.0897799	0.512275	0.611111	0.562753	0.611111	0.562753	0.360924	0.224528	0.905883	0.27207	0.762318	0.462381	1.40932	0.187506	0.364038	0.584132	0.145914	0.293906	1.41886	0.594616	1.06894	0.435375	1.87075	0.384651	0.131745	1.03411	0.498315	0.14262	1.46212	0.679373	0.789616	0.436599	0.153357	0.492559	0.394329
13.563	0.0573352	0.511617	0.291341	0.53384	0.466732	0.676848	0.298464	0.600871	0.953054	0.619515	0.330855	0.243312	0.224668	0.334128	0.0937638	0.486446	0.684042	0.610892	0.684042	0.610892	0.372743	0.197832	0.76049	0.288657	0.914499	0.503738	1.50855	0.170705	0.31612	0.562815	0.186019	0.294278	1.43306	0.472745	1.16599	0.371947	1.5232	0.383847	0.146126	1.05849	0.500948	0.172166	1.13178	0.665627	0.71614	0.336572	0.170339	0.496572	0.431512
13.7	0.0489779	0.511304	0.400687	0.517672	0.548537	0.649209	0.288671	0.623591	1.0907	0.61237	0.353461	0.249367	0.237081	0.344669	0.13041	0.446595	0.570994	0.641183	0.570994	0.641183	0.439288	0.259811	0.787382	0.330094	1.183	0.521194	1.45494	0.149468	0.298458	0.531628	0.194768	0.289578	1.58547	0.425905	1.20191	0.418492	1.50857	0.350732	0.139597	0.998426	0.481431	0.184998	0.789645	0.653924	0.755421	0.277688	0.193917	0.534784	0.405669
13.837	0.0664117	0.492804	0.572724	0.494872	0.482995	0.58617	0.411528	0.562075	1.38493	0.573994	0.413979	0.248015	0.253279	0.345255	0.168826	0.429842	0.392924	0.605547	0.392924	0.605547	0.51164	0.272393	0.930888	0.341316	1.54184	0.533125	1.33394	0.151731	0.411237	0.542317	0.200646	0.289823	1.86195	0.447721	1.33177	0.449243	1.50184	0.312048	0.183146	0.914985	0.423542	0.17531	0.58603	0.685394	0.935013	0.298256	0.131556	0.551219	0.438606
13.974	0.0636877	0.467273	0.786019	0.4827	0.441443	0.611889	0.559314	0.530138	1.70649	0.521018	0.373692	0.224055	0.278441	0.3183	0.172102	0.41211	0.218153	0.555096	0.218153	0.555096	0.572439	0.235314	0.875195	0.312779	1.67965	0.543909	1.14447	0.134579	0.515161	0.586214	0.198857	0.286892	1.81472	0.465344	1.27135	0.426271	1.28765	0.2901	0.142601	0.829105	0.446981	0.213192	0.587454	0.594621	0.903925	0.325573	0.160988	0.629199	0.426094
14.111	0.0533908	0.501133	0.963793	0.486165	0.336959	0.640714	0.633206	0.510419	1.97731	0.477598	0.272294	0.210627	0.310841	0.284255	0.189719	0.410875	0.187895	0.510427	0.187895	0.510427	0.518581	0.195382	0.828768	0.34321	1.65706	0.528074	0.914265	0.105414	0.542635	0.583645	0.204581	0.284694	1.63965	0.441064	1.19532	0.421695	0.908543	0.259072	0.193423	0.878058	0.497921	0.278389	0.456252	0.647222	0.969082	0.297796	0.1193	0.624855	0.431482
14.248	0.0762835	0.506937	1.11258	0.471058	0.351265	0.640222	0.674159	0.451618	2.1705	0.440538	0.233706	0.215008	0.346865	0.273243	0.17755	0.413201	0.151541	0.514575	0.151541	0.514575	0.520387	0.244862	0.844096	0.365925	1.50136	0.53427	0.753244	0.102112	0.670727	0.610095	0.208536	0.274326	1.41573	0.394402	1.17744	0.454045	0.57844	0.190167	0.207593	0.874319	0.509359	0.347125	0.311221	0.53032	0.858006	0.218697	0.118611	0.612476	0.327294
14.385	0.112987	0.504028	1.22948	0.462196	0.325082	0.594066	0.728243	0.421753	2.07858	0.418461	0.257325	0.210734	0.377245	0.291411	0.166096	0.387159	0.209615	0.561378	0.209615	0.561378	0.430284	0.231347	0.811659	0.390134	1.32465	0.579703	0.682222	0.102901	0.811197	0.62374	0.219164	0.257804	1.17721	0.373576	0.977358	0.430041	0.46018	0.183464	0.163057	0.82898	0.515551	0.372473	0.199139	0.433639	0.69807	0.254182	0.161592	0.562005	0.398094
14.522	0.116332	0.49002	1.30947	0.503969	0.300954	0.606125	0.723569	0.371025	1.85027	0.377486	0.274711	0.198561	0.416094	0.300831	0.169201	0.346106	0.262491	0.546812	0.262491	0.546812	0.371492	0.214625	0.77524	0.483057	1.12306	0.602397	0.687418	0.125071	0.862077	0.604498	0.254104	0.248026	1.0017	0.370312	1.13939	0.495528	0.460341	0.208858	0.208615	0.760728	0.4773	0.37088	0.207477	0.490557	0.730744	0.214635	0.157064	0.528482	0.402781
14.659	0.14853	0.526396	1.34076	0.514799	0.329274	0.650023	0.798797	0.309366	1.59343	0.334201	0.296816	0.187665	0.473907	0.291785	0.157935	0.32899	0.366366	0.503366	0.366366	0.503366	0.382135	0.286349	0.754706	0.570178	0.942439	0.638102	0.665908	0.0969378	0.756789	0.623486	0.238618	0.271141	0.931646	0.376155	1.02432	0.439015	0.527445	0.186148	0.284158	0.738909	0.479844	0.407633	0.199344	0.478628	0.777214	0.224124	0.196201	0.487215	0.402615
14.796	0.165463	0.540908	1.36104	0.521411	0.33362	0.636306	0.853771	0.277144	1.41977	0.341702	0.30057	0.193562	0.542997	0.2767	0.147149	0.321838	0.471333	0.545315	0.471333	0.545315	0.320608	0.327492	0.666734	0.653015	0.75122	0.674105	0.617201	0.0477652	0.536314	0.722346	0.207593	0.276264	0.976521	0.383742	0.993849	0.447142	0.56997	0.162228	0.333016	0.708543	0.488312	0.453118	0.269723	0.390355	0.826791	0.151999	0.205666	0.534001	0.452417
14.933	0.187571	0.521607	1.19814	0.518903	0.34002	0.651517	0.891163	0.259496	1.30976	0.340794	0.307133	0.233831	0.618974	0.267983	0.169594	0.320223	0.532993	0.518007	0.532993	0.518007	0.28179	0.324691	0.519785	0.703967	0.584248	0.688906	0.59525	0.0455526	0.416844	0.776431	0.273616	0.252077	0.778049	0.408195	1.03685	0.468631	0.617614	0.202669	0.271046	0.707904	0.486682	0.397027	0.182661	0.417279	0.925461	0.231454	0.29415	0.535554	0.610335
15.07	0.173907	0.500765	0.979201	0.483902	0.394019	0.690848	0.967503	0.25921	1.18081	0.345988	0.368033	0.288895	0.662396	0.275617	0.215111	0.305931	0.504125	0.471842	0.504125	0.471842	0.324911	0.31645	0.48927	0.7662	0.470903	0.61938	0.567194	0.0436989	0.32818	0.701164	0.325743	0.2339	0.735716	0.348053	1.07373	0.505213	0.649214	0.215486	0.196759	0.711504	0.522631	0.330222	0.217245	0.40626	1.08209	0.196743	0.322819	0.425579	0.706267
15.207	0.148263	0.472598	0.841263	0.423887	0.416134	0.718918	0.96372	0.287361	1.0424	0.326403	0.464206	0.315902	0.615962	0.274397	0.227555	0.280622	0.568489	0.436361	0.568489	0.436361	0.413764	0.398153	0.441208	0.738394	0.365222	0.595547	0.540907	0.0495284	0.294613	0.686628	0.353851	0.230931	0.809189	0.318928	0.874956	0.52804	0.537715	0.163122	0.21766	0.691659	0.586802	0.339164	0.194867	0.456927	1.15534	0.121268	0.475288	0.495307	0.870623
15.344	0.162553	0.44336	0.745776	0.391224	0.396331	0.72136	0.835521	0.310295	0.909769	0.276322	0.559986	0.305383	0.588007	0.228162	0.229998	0.279665	0.547004	0.395006	0.547004	0.395006	0.437015	0.490801	0.472567	0.718023	0.264839	0.554069	0.503155	0.073929	0.339484	0.579395	0.471243	0.244277	0.819242	0.323285	0.827228	0.50604	0.425489	0.160487	0.243775	0.621599	0.544014	0.334523	0.120825	0.361271	1.48001	0.238304	0.423753	0.540202	0.941124
15.481	0.206813	0.435401	0.662253	0.393821	0.405444	0.740242	0.703983	0.323513	0.759661	0.247866	0.741348	0.27949	0.61601	0.191559	0.264957	0.309765	0.59678	0.362189	0.59678	0.362189	0.366469	0.524098	0.498456	0.637919	0.217811	0.57083	0.496164	0.088902	0.364345	0.536747	0.52665	0.251421	0.774118	0.297514	0.71305	0.491814	0.451853	0.267556	0.257563	0.594093	0.442676	0.356377	0.291081	0.333778	1.31045	0.169972	0.35851	0.46679	0.867274
15.618	0.261953	0.439939	0.717793	0.391538	0.348661	0.805053	0.570665	0.349091	0.660646	0.228849	0.938744	0.284498	0.602947	0.172798	0.302776	0.33685	0.690779	0.326709	0.690779	0.326709	0.331017	0.543865	0.477803	0.517915	0.215812	0.591172	0.569467	0.112154	0.374057	0.499611	0.546837	0.248634	0.69321	0.302943	0.626517	0.504146	0.473512	0.343951	0.284853	0.55938	0.397954	0.408235	0.31854	0.367407	1.24899	0.181537	0.373323	0.336763	0.820036
15.755	0.320857	0.453716	0.724416	0.349024	0.295853	0.81926	0.472289	0.341375	0.618586	0.197912	1.02212	0.327755	0.5508	0.137023	0.304703	0.344777	0.703206	0.24277	0.703206	0.24277			0.472443	0.447334	0.246018	0.619883	0.607228	0.146984	0.390656	0.471546	0.548492	0.228036	0.696095	0.313487	0.628634	0.524729	0.436351	0.385066	0.338737	0.556346	0.309998	0.410784	0.372647	0.410236	1.08339	0.227412	0.529157	0.299705	0.870966
15.892	0.37318	0.479237	0.67434	0.322896	0.271751	0.816499	0.419541	0.324085	0.59074	0.184079	1.03576	0.351182	0.534512	0.128787	0.296179	0.326872	0.758992	0.225717	0.758992	0.225717			0.458494	0.410843	0.23612	0.603405	0.565644	0.156053	0.433178	0.510311	0.549638	0.225238	0.753425	0.312117	0.62343	0.5337	0.342043	0.432337	0.433884	0.56558	0.218347	0.3676	0.409668	0.318102	0.870958	0.213755	0.665104	0.245557	0.772543
16.029	0.409388	0.49434	0.721722	0.31813	0.191883	0.855969	0.365234	0.312367	0.563603	0.162564	1.07329	0.347078	0.59395	0.155428	0.30018	0.293799	0.933831	0.237347	0.933831	0.237347			0.461706	0.391206	0.261177	0.590327	0.601146	0.196662	0.482583	0.528151	0.530159	0.226769	0.740933	0.326832	0.63688	0.528052	0.357231	0.487523	0.470469	0.560016	0.168427	0.304329	0.481067	0.292199	0.805807	0.247019	0.77683	0.2807	0.754878
16.166	0.482528	0.510858	0.787941	0.314393	0.218035	0.781066	0.330959	0.330086	0.584076	0.139289	1.07575	0.310195	0.688059	0.176878	0.322912	0.278964	1.15091	0.217691	1.15091	0.217691			0.451958	0.371328	0.402698	0.56912	0.638802	0.187175	0.490316	0.490822	0.451898	0.195294	0.785855	0.30261	0.657036	0.580726	0.530341	0.529634	0.478469	0.564758	0.137908	0.254893	0.406006	0.285153	0.844149	0.271277	0.790834	0.319086	0.863141
16.303	0.526091	0.445822	0.872686	0.273764	0.252416	0.732191	0.354106	0.363809	0.609935	0.111759	1.04114	0.275635	0.725591	0.175594	0.363373	0.276015	1.22154	0.1594	1.22154	0.1594			0.373411	0.356913	0.487815	0.557026	0.670776	0.168526	0.520107	0.473178	0.38499	0.177424	0.982273	0.321488	0.67852	0.597216	0.711713	0.554231	0.501624	0.588777	0.181357	0.224904	0.348646	0.358885	0.708592	0.334079	0.919377	0.286858	0.898603
16.44	0.576114	0.372181	0.93872	0.222826	0.24505	0.724625	0.383262	0.396746	0.647373	0.0952052	0.959275	0.249155	0.753275	0.172119	0.469915	0.266015	1.12035	0.0938416	1.12035	0.0938416			0.255414	0.418232	0.484169	0.478175	0.691491	0.194113	0.520895	0.442878	0.289625	0.129122	1.09215	0.34026	0.778777	0.663339	0.876805	0.55565	0.549949	0.600286	0.225895	0.184002	0.376309	0.302196	0.674852	0.299305	0.847147	0.315599	0.909761
16.577	0.747679	0.308435	0.902667	0.184497	0.285374	0.724196	0.3363	0.429612	0.693456	0.0844785	0.818669	0.227219	0.853337	0.182035	0.626326	0.228648	1.05259	0.0770882	1.05259	0.0770882			0.29543	0.454097	0.454038	0.441086	0.660703	0.227782	0.567396	0.432805	0.317452	0.098551	1.0576	0.342172	0.779859	0.647511	0.861085	0.511467	0.551846	0.546024	0.256172	0.196105	0.414959	0.281065	0.50983	0.304416	0.9008	0.378395	0.971065
16.714	1.00014	0.23168	0.903536	0.145317	0.294092	0.694604	0.317827	0.450903	0.684568	0.0938044	0.701769	0.222065	1.07428	0.202299	0.800121	0.17861	1.0049	0.0640027	1.0049	0.0640027					0.40063	0.423609	0.617051	0.211654	0.694668	0.426677	0.413646	0.0844254	0.889581	0.34109	0.789921	0.637252	0.775721	0.584796	0.496302	0.533966	0.336832	0.198777	0.497134	0.319692	0.523171	0.387914	0.988874	0.438471	0.876918
16.851	1.05876	0.141829	0.944135	0.125211	0.301067	0.655551	0.290451	0.466908	0.619022	0.109148	0.612805	0.152601	1.35493	0.197937	0.956509	0.130504	0.829321	0.0254004	0.829321	0.0254004					0.372295	0.446818	0.555389	0.204551	0.905547	0.415138	0.496963	0.098446	0.72062	0.349103	0.812401	0.552154	0.678289	0.649931	0.488217	0.556833	0.406611	0.230849	0.54697	0.239938	0.571682	0.328024	0.972888	0.398616	0.794218
16.988	1.12094	0.0592067	0.942217	0.105375	0.249991	0.582386	0.347206	0.493486	0.548457	0.110239	0.619827	0.115523	1.47725	0.210619	0.951863	0.0847798	0.642804	0.023066	0.642804	0.023066					0.291522	0.464031	0.520179	0.210905	0.99721	0.378476	0.608885	0.121523	0.631348	0.362189	0.787104	0.561516	0.576859	0.667696	0.546429	0.553649	0.426822	0.210447	0.65539	0.293105	0.595319	0.369607	0.8305	0.407605	0.81075
17.125	1.2235	0.0577435	0.898235	0.091775	0.26344	0.526367	0.310928	0.56822	0.508854	0.106692	0.724427	0.0806468	1.3775	0.229849	0.768009	0.0704995	0.528063	0.0369056	0.528063	0.0369056					0.233146	0.487693	0.537861	0.258455	1.00786	0.358608	0.680569	0.122185	0.679192	0.387569	0.856137	0.490554	0.408672	0.791548	0.598085	0.531725	0.442129	0.217493	0.833786	0.230624	0.518281	0.381587	0.603318	0.42476	0.706459
17.262	1.22846	0.0586328	0.855603	0.116282	0.34302	0.496801	0.382817	0.646383	0.514988	0.0983017	0.79914	0.0416033	1.20814	0.228404	0.555224	0.0749172	0.484103	0.0330382	0.484103	0.0330382					0.223973	0.558999	0.52472	0.2443	0.907113	0.37057	0.71081	0.09352	0.646955	0.40741	0.900155	0.542894	0.359657	0.783433	0.741395	0.486824	0.430591	0.194	0.753029	0.230849	0.366312	0.319792	0.51214	0.37381	0.746244
17.399	1.1934	0.0539489	0.855356	0.14251	0.438114	0.487163	0.420876	0.662459	0.540985	0.0987378	0.819061	0.0121154	1.19595	0.247152	0.410999	0.0701241	0.53587	0.00635147	0.53587	0.00635147							0.506028	0.228075	0.733377	0.362055	0.76032	0.069463	0.541151	0.412716	0.773609	0.520276	0.389487	0.801885	1.0483	0.484138	0.580178	0.261478	0.789235	0.216761	0.286036	0.33454	0.462394	0.378114	0.716946
17.536	1.10686	0.0506273	0.862261	0.12562	0.510827	0.502624	0.437569	0.653456	0.562731	0.116566	0.96497	0.0156799	1.27867	0.261371	0.347291	0.0582073	0.497857	0	0.497857	0							0.405905	0.203366	0.651521	0.35162	0.694706	0.0213681	0.507567	0.420857	0.705433	0.489013	0.404941	0.842058	1.43671	0.483154	0.614387	0.265527	0.857992	0.209492	0.366832	0.343298	0.461796	0.417079	0.61261
17.673	1.02676	0.0501396	0.864682	0.113147	0.578824	0.520556	0.507455	0.671961	0.573161	0.12663	1.33371	0.0488874	1.29453	0.278283	0.351808	0.0505147	0.385815	0.000995277	0.385815	0.000995277							0.293459	0.192515	0.711843	0.343883	0.660313	0	0.458099	0.434147	0.68311	0.483303	0.430213	0.90447	1.75234	0.423572	0.576394	0.337089	0.91108	0.110992	0.455979	0.264741	0.49309	0.412099	0.688593
17.81	0.86801	0.02861	0.836818	0.132302	0.672027	0.501798	0.494546	0.661101	0.637399	0.142809	1.72001	0.0437722	1.22225	0.286019	0.382812	0.0650972	0.353298	0.0255584	0.353298	0.0255584							0.217315	0.187949	0.842252	0.340551	0.610745	0.0381475	0.447896	0.53339	0.643914	0.476736	0.433602	0.937629	1.78498	0.383935	0.637905	0.371059	0.743267	0.0733892	0.511128	0.234493	0.577406	0.426363	0.68369
17.947	0.754898	0	0.778588	0.121642	0.687566	0.45328	0.472067	0.675605	0.757011	0.143109	1.96015	0.0321329	1.14706	0.297606	0.396229	0.0915847	0.372153	0.038436	0.372153	0.038436							0.212287	0.160531	1.03303	0.345325	0.585044	0.0749076	0.543548	0.491117	0.489392	0.486061	0.411659	0.845665	1.83084	0.394697	0.762587	0.410696	0.640337	0.161322	0.564817	0.271633	0.568476	0.377167	0.597088
18.084	0.705168	0.0156873	0.747765	0.111146	0.715809	0.402834	0.428889	0.66646	0.864671	0.12395	2.01896	0.0240473	1.08453	0.325862	0.420613	0.0896202	0.458329	0.0512027	0.458329	0.0512027							0.226738	0.14607	1.11235	0.331616	0.462137	0.131228	0.730293	0.492217	0.440022	0.514307	0.391334	0.860112	1.97247	0.406275	0.944602	0.406461	0.547175	0.119059	0.497655	0.313383	0.576181	0.366156	0.582139
18.221	0.701817	0.0386295	0.761704	0.131558	0.863602	0.364225	0.413086	0.669175	0.893617	0.12091	1.96671	0.0156253	0.936535	0.335666	0.454694	0.0881114	0.635582	0.0291292	0.635582	0.0291292							0.266249	0.160643	1.05842	0.336383	0.364957	0.221337	0.757642	0.520731	0.464288	0.593299	0.395132	0.824503	2.15791	0.421142	0.908532	0.396311	0.523784	0.128262	0.679874	0.334203	0.576614	0.362646	0.542118
18.358	0.842617	0.0443961	0.81159	0.12038	0.993072	0.340676	0.362563	0.639238			1.72022	0	0.855794	0.372343	0.484163	0.101702	0.909618	0.00775983	0.909618	0.00775983							0.25993	0.121017	0.963293	0.356302	0.303876	0.282049	0.685732	0.550512	0.481622	0.636135	0.463451	0.80879	2.42609	0.416304	0.733167	0.423712	0.462961	0.146327	0.634697	0.30341	0.649101	0.365698	0.564126
18.495	1.08484	0.0505979	0.955808	0.109154	1.12561	0.295768	0.277542	0.561075					0.803194	0.467181	0.458426	0.114677	1.2743	0.0255528	1.2743	0.0255528									0.884357	0.347421	0.264828	0.325801	0.585717	0.596003	0.535223	0.615342	0.543763	0.748069	2.4156	0.407432	0.706007	0.359816	0.449337	0.127581	0.544964	0.318913	0.62197	0.408635	0.590562
18.632	1.28786	0.0596987	1.30271	0.092386	1.30201	0.280627	0.304028	0.583795					0.638374	0.543989	0.388267	0.139946	1.26518	0.056448	1.26518	0.056448									0.842522	0.325109	0.220482	0.406955	0.483042	0.63794	0.595333	0.586602			2.21442	0.382567	0.730476	0.322846	0.412926	0.115878	0.435742	0.332487	0.779706	0.419127	0.590209
18.769	1.37972	0.0547583	1.68163	0.0801788	1.36162	0.287157	0.31204	0.562361					0.571128	0.578429	0.328179	0.180676	0.8967	0.0417795	0.8967	0.0417795									0.74247	0.299173	0.263077	0.498021	0.454557	0.609007	0.549852	0.575937			2.00035	0.338227	0.794777	0.28571	0.493677	0.0738441	0.334511	0.29524	0.773977	0.433829	0.622847
18.906	1.1973	0.0548045	1.76019	0.0652907	1.3867	0.285446	0.267304	0.51292					0.566816	0.596938	0.252888	0.172922	0.759758	0.00496252	0.759758	0.00496252									0.660942	0.298343	0.285333	0.531762			0.487692	0.510746			1.90891	0.355211	0.7194	0.199594	0.434079	0.0445342	0.371555	0.315521	0.781654	0.392782	0.65144
19.043	0.871001	0.0600876	1.50554	0.0469645	1.40977	0.282412	0.242154	0.487913					0.548039	0.603277	0.224549	0.123165													0.638778	0.328125	0.266694	0.492828							2.15295	0.392769	0.647629	0.182663	0.42696	0.0695275	0.399016	0.324507	0.658401	0.345471	0.671276
19.18	0.802917	0.111915	1.18065	0.0492071	1.41194	0.286614	0.266414	0.461049					0.510538	0.621727	0.294655	0.118143													0.619387	0.33295	0.24845	0.498686							2.21722	0.404546	0.545554	0.138521	0.530903	0.100428	0.371884	0.303495	0.506758	0.325739	0.725903
19.317	0.733122	0.13379	0.967462	0.0480825	1.28042	0.291452							0.503903	0.621249	0.328578	0.14571													0.555489	0.329453	0.224787	0.521197							2.06428	0.356495	0.493773	0.185529			0.373308	0.294214	0.506895	0.384031	0.734738
19.454	0.684596	0.129635	0.96255	0.055448	1.00171	0.273347							0.517888	0.554794	0.287883	0.152158													0.443017	0.360866	0.132637	0.486286							1.74032	0.366007	0.272846	0.128067			0.517281	0.244336	0.585863	0.379747	0.677091
19.591	0.651537	0.125637	0.986953	0.0670751	0.818439	0.251054									0.296003	0.153549													0.357479	0.36366	0.138393	0.396269							1.52887	0.371722	0.253938	0.129121			0.710244	0.320001	0.689371	0.361441	0.597093
19.728	0.62075	0.146464	1.03435	0.0804423	0.792775	0.26318									0.32709	0.173772													0.338966	0.375798	0.128542	0.377778							1.44185	0.387249	0.304311	0.125901			0.653479	0.344804	0.850518	0.3989	0.559689
19.865	0.588046	0.1636	1.02883	0.0582861	0.839541	0.260008									0.336188	0.182015													0.357559	0.362167	0.134656	0.400625							1.5464	0.425185	0.349563	0.120789			0.50941	0.360327	0.823507	0.405731	0.506754
20.002	0.614234	0.174795	0.985017	0.0329398	0.78435	0.22951									0.358305	0.190128													0.399177	0.357531	0.152008	0.407197							1.28317	0.442864	0.240129	0.152225			0.323438	0.442086	0.599782	0.368988	0.46791
20.139	0.635711	0.180202	0.978226	0.0555166	0.67887	0.219875									0.441213	0.19378													0.431031	0.377995	0.134464	0.372238							1.34449	0.440663	0.422974	0.154386			0.250512	0.502166	0.387173	0.359788	0.387191
20.276	0.649091	0.16869	0.941873	0.0609339	0.729314	0.202366									0.528631	0.181108													0.47869	0.341797	0.103262	0.336451							1.55452	0.450801					0.257766	0.38997	0.304003	0.378305	0.556307
20.413	0.613728	0.137178	0.929015	0.0403119	0.815305	0.177574									0.61598	0.217992													0.522953	0.338425	0.0493066	0.319067							1.69827	0.455421					0.183446	0.426753	0.233538	0.367281	0.458771
20.55	0.605757	0.124525	0.964592	0.0221318	0.902981	0.14146									0.656968	0.266601													0.55313	0.327133	0.0368128	0.317419							1.58534	0.42508					0.173959	0.398221	0.169474	0.407822	0.582473
20.687	0.632366	0.116675	0.924257	0.0334888											0.625582	0.300821													0.662909	0.355253	0.0296171	0.33985							1.40367	0.398598					0.147342	0.317364	0.118554	0.437862	0.82334
20.824	0.663632	0.129116	0.903395	0.035778											0.577236	0.334668													0.714049	0.333709	0.0688497	0.403763							1.33688	0.324817					0.0994775	0.348157			0.986127
20.961	0.641137	0.138234	0.98242	0.0345205											0.478457	0.376286													0.727363	0.339092									1.25828	0.295736					0.104696	0.331291			0.979631
21.098	0.699148	0.129171	1.06404	0.033263											0.375958	0.429042													0.741206	0.366643									1.18542	0.277021					0.128883	0.372414			0.685955
21.235	0.663229	0.0945504	1.04747	0.0195992											0.3639	0.429953													0.716281	0.392626									1.17338	0.268791					0.228103	0.373441			0.495311
21.372	0.521688	0.119973	1.02079	0.0277063											0.432208	0.42069													0.704528	0.391288									1.06785	0.281615					0.265278	0.33852			0.37615
21.509	0.443564	0.0912267	0.948086	0.0203652											0.540443	0.425344													0.700365	0.407903									0.996608	0.350109									0.315654
21.646	0.387253	0.099928	0.935131	0											0.616736	0.459149													0.72621	0.366514									1.01614	0.261597									0.298063
21.783	0.479897	0.109634	0.971338	0.0474161											0.670648	0.494975																							1.02253	0.303506									0.323229
21.92	0.464615	0.11184	0.931691	0.0783945											0.695776	0.503303																							1.02108	0.300065									0.316272
22.057	0.420584	0.132961	1.01047	0.101596											0.670355	0.505879																							1.02263	0.299945									0.251433
22.194	0.41811	0.134624	1.05947	0.0846021											0.547016	0.528857																							1.02356	0.356342									0.220286
22.331	0.50298	0.179035	0.905075	0.102826											0.368312	0.55827																																	0.299314
22.468	0.57095	0.231601	0.807101	0.109154											0.281637	0.578605																																	0.449103
22.605	0.621769	0.292458	0.81626	0.126081											0.260575	0.604594																																	0.474401
22.742	0.624079	0.316239	0.698941	0.118142											0.245119	0.608792																																	0.574854
22.879	0.6095	0.3223													0.27886	0.607342																																	0.568495
23.016	0.579078	0.324787													0.342041	0.61014																																	0.54023
23.153	0.483612	0.309181													0.357057	0.571155																																	0.414298
23.29	0.354058	0.291127													0.338784	0.479785
23.427	0.276635	0.268872													0.347964	0.449208
23.564	0.253492	0.278749													0.392819	0.410001
23.701	0.250463	0.321324
23.838
23.975
24.112
24.249
24.386
24.523
24.66
24.797
24.934
25.071
25.208
25.345
25.482
25.619
25.756
25.893
26.03
26.167
26.304
26.441
26.578
26.715
26.852
26.989
27.126
27.263
27.4
27.537
27.674
27.811
27.948
28.085
28.222
28.359
28.496
28.633
28.77
28.907
29.044
29.181
29.318
29.455
29.592
29.729
29.866
30.003
v
[truncated: 47 more columns]

## Sheet: Notum
Figure 4 - NOTUM Pixel intensity profile (Normalized Pixel Intensity measured from basal to apical side of progenitor cells )
	Cell 1		Cell 2		Cell 3		Cell 4		Cell 5		Cell 6		Cell 7		Cell 8		Cell 9		Cell 10		Cell 11		Cell 12		Cell 13		Cell 14		Cell 15		Cell 16		Cell 17		Cell 18		Cell 19		Cell 20		Cell 21		Cell 22		Cell 23		Cell 24		Cell 25
	Normalized Pixel Intensity	Normalized Pixel Intensity	Normalized Pixel Intensity	Normalized Pixel Intensity	Normalized Pixel Intensity	Normalized Pixel Intensity	Normalized Pixel Intensity	Normalized Pixel Intensity	Normalized Pixel Intensity	Normalized Pixel Intensity	Normalized Pixel Intensity	Normalized Pixel Intensity	Normalized Pixel Intensity	Normalized Pixel Intensity	Normalized Pixel Intensity	Normalized Pixel Intensity	Normalized Pixel Intensity	Normalized Pixel Intensity	Normalized Pixel Intensity	Normalized Pixel Intensity	Normalized Pixel Intensity	Normalized Pixel Intensity	Normalized Pixel Intensity	Normalized Pixel Intensity	Normalized Pixel Intensity	Normalized Pixel Intensity	Normalized Pixel Intensity	Normalized Pixel Intensity	Normalized Pixel Intensity	Normalized Pixel Intensity	Normalized Pixel Intensity	Normalized Pixel Intensity	Normalized Pixel Intensity	Normalized Pixel Intensity	Normalized Pixel Intensity	Normalized Pixel Intensity	Normalized Pixel Intensity	Normalized Pixel Intensity	Normalized Pixel Intensity	Normalized Pixel Intensity	Normalized Pixel Intensity	Normalized Pixel Intensity	Normalized Pixel Intensity	Normalized Pixel Intensity	Normalized Pixel Intensity	Normalized Pixel Intensity	Normalized Pixel Intensity	Normalized Pixel Intensity	Normalized Pixel Intensity
(basal to apical distance um)	MYC - Tag	DAPI	MYC - Tag	DAPI	MYC - Tag	DAPI	MYC - Tag	DAPI	MYC - Tag	DAPI	MYC - Tag	DAPI	MYC - Tag	DAPI	MYC - Tag	DAPI	MYC - Tag	DAPI	MYC - Tag	DAPI	MYC - Tag	DAPI	MYC - Tag	DAPI	MYC - Tag	DAPI	MYC - Tag	DAPI	MYC - Tag	DAPI	MYC - Tag	DAPI	MYC - Tag	DAPI	MYC - Tag	DAPI	MYC - Tag	DAPI	MYC - Tag	DAPI	MYC - Tag	DAPI	MYC - Tag	DAPI	MYC - Tag	DAPI	MYC - Tag	DAPI	MYC - Tag
0	0.00973709	0.675114	0.378442	0.387599	0.127951	0.577488	0.117627	0.298626	0.194923	0.406962	0.0813034	0.233251	0.314046	0.146484	0.135421	0.465613	0	0.280781	0.0401258	0.0105621	0.0470485	0.0628905	0.0967558	0	0.241118	0.145654	0.226359	0.144724	0.245253	0	0.0401405	0.0701623	0.0540346	0.101798	0.00929514	0	0.0201263	0.50702	0.058673	0.255808	0.27391	0.0103266	0.16378	0	0.0815826	0.0750965	0.0676323	0.0117576	0.0564047
0.137	0	0.655127	0.378617	0.389438	0.167124	0.572056	0.147272	0.250474	0.213695	0.415811	0.13908	0.251948	0.344162	0.123533	0.0839061	0.500264	0.0157334	0.282207	0.0624372	0	0.0839963	0.13713	0.0773357	0.0299575	0.288145	0.142499	0.173332	0.109215	0.197252	0.014933	0.0371726	0.0683105	0.0994167	0.10319	0.00621174	0.0318141	0.17386	0.35861	0.0285718	0.1352	0.234522	0.0549232	0.180799	0.0727337	0.106535	0.0751266	0.0945578	0.010876	0.0604536
0.274	0.0679607	0.564237	0.419193	0.353881	0.205724	0.496198	0.216014	0.217255	0.234155	0.428738	0.190668	0.244507	0.374953	0.0861658	0.0965644	0.57115	0.0418679	0.290531	0.156689	0.00830271	0.119119	0.216853	0.0779883	0.0281964	0.277677	0.151215	0.131768	0.0863209	0.146228	0.0284093	0.0457987	0.0849207	0.159129	0.112283	0.0231776	0.0706208	0.139239	0.212014	0.0160796	0.127579	0.218764	0	0.237776	0.153917	0.118422	0.0922475	0.210979	0.0623595	0
0.411	0.161204	0.662223	0.448284	0.307442	0.211627	0.448806	0.235717	0.224557	0.236743	0.445424	0.200804	0.274786	0.384658	0.0542794	0.100092	0.570021	0.0275738	0.246863	0.299604	0.0301654	0.179658	0.259411	0.130405	0.0435794	0.272736	0.164337	0.116441	0.0660476	0.1579	0.060508	0.0674656	0.11718	0.224857	0.103121	0.0499776	0.116802	0.136243	0.0984131	0.00915084	0.158771	0.212498	0.0351892	0.211904	0.308284	0.185321	0.0511916	0.18004	0.0245126	0.0376652
0.548	0.21182	0.624812	0.550108	0.301963	0.18911	0.502353	0.299342	0.238719	0.254225	0.433091	0.212499	0.334756	0.395186	0.0458428	0.0849105	0.595304	0.015836	0.221196	0.391867	0.0366748	0.25401	0.29478	0.223321	0.095429	0.241193	0.176906	0.134741	0.0389035	0.219811	0.121313	0.102176	0.11556	0.281322	0.0727864	0.1038	0.166778	0.194137	0.0664818	0.0318802	0.20111	0.240684	0.0561864	0.362518	0.381936	0.17504	0.0711517	0.258999	0	0.0495717
0.685	0.166286	0.6368	0.539265	0.282185	0.174552	0.555284	0.35009	0.253117	0.227778	0.448204	0.234897	0.381205	0.437412	0.0425657	0.0629799	0.66274	0.0226333	0.232712	0.406877	0.0377603	0.300602	0.310384	0.2547	0.196077	0.181598	0.176906	0.178798	0.0104829	0.270366	0.208731	0.145133	0.0912408	0.316914	0.0478095	0.199107	0.219876	0.294056	0.0193185	0	0.23251	0.161294	0.19318	0.415138	0.447555	0.208887	0.0476137	0.277378	0.0236915	0.0283666
0.822	0.178005	0.597464	0.637971	0.260972	0.135392	0.544667	0.413283	0.27185	0.162034	0.49783	0.235843	0.470251	0.457294	0.0291745	0.0479751	0.725923	0.0480866	0.27492	0.417569	0.0758881	0.346804	0.331853	0.29638	0.273136	0.151293	0.198081	0.243896	0	0.278602	0.295386	0.207669	0.0771768	0.341605	0.0641477	0.316115	0.26343	0.471565	0	0.0257852	0.290157	0.175325	0.302789	0.437407	0.422996	0.238966	0.069413	0.338914	0.0344466	0.055993
0.959	0.213631	0.527921	0.628539	0.24935	0.0748979	0.616827	0.483085	0.232924	0.160834	0.444074	0.204429	0.560795	0.446185	0.0576138	0.0631811	0.790489	0.0780848	0.328633	0.414362	0.0994317	0.408123	0.331663	0.375373	0.320241	0.127876	0.224148	0.3197	0.0103607	0.275928	0.361307	0.323326	0.0680088	0.382595	0.114003	0.416125	0.303257	0.536606	0.120445	0.0232546	0.326307	0.226511	0.430861	0.454502	0.445852	0.255491	0.0556038	0.472193	0.0987657	0.121843
1.096	0.168225	0.478113	0.534575	0.253713	0.0350501	0.677961	0.596286	0.260279	0.266627	0.463685	0.149387	0.621565	0.459039	0.0956665	0.0660229	0.876802	0.104974	0.373845	0.320969	0.0726759	0.427737	0.287974	0.434378	0.347553	0.12287	0.24951	0.385667	0.0238275	0.303682	0.414618	0.455579	0.047267	0.415644	0.181729	0.456027	0.352972	0.585479	0.131477	0.0320969	0.24249	0.253766	0.51815	0.460386	0.523519	0.265858	0.0326085	0.507962	0.0998287	0.0612624
1.233	0.232665	0.510898	0.49893	0.258914	0	0.648685	0.585693	0.22525	0.356342	0.465339	0.0670203	0.676385	0.484551	0.114012	0.0621242	0.969479	0.130028	0.411159	0.238891	0.0978869	0.397109	0.267166	0.492291	0.345929	0.186847	0.32679	0.453822	0.0352643	0.343511	0.459391	0.550009	0.0274161	0.420389	0.262116	0.46746	0.392198	0.612736	0.273684	0.0506972	0.266903	0.326769	0.494673	0.367379	0.419039	0.283548	0.0527947	0.510115	0.036381	0.0737619
1.37	0.283844	0.520161	0.55244	0.274237	0.0228138	0.63634	0.473553	0.212687	0.410631	0.44543	0.0077854	0.714108	0.50456	0.130647	0.0845133	1.02631	0.170757	0.439367	0.185955	0.0967027	0.357229	0.270192	0.535717	0.339014	0.253815	0.378059	0.524505	0.0613629	0.362388	0.488702	0.594274	0.0315827	0.421018	0.341997	0.462546	0.401205	0.575026	0.395325	0.0457608	0.294239	0.422937	0.470111	0.448649	0.427649	0.250791	0	0.486804	0.0231071	0.121848
1.507	0.274519	0.543351	0.477168	0.309507	0.0293997	0.676926	0.372139	0.183475	0.388168	0.432149	0	0.736746	0.502621	0.141114	0.10572	1.04133	0.21614	0.439254	0.142617	0.13481	0.303926	0.296861	0.631949	0.328644	0.298774	0.394159	0.54603	0.0997572	0.368303	0.488827	0.614207	0.0395581	0.434051	0.411098	0.460165	0.416226	0.538586	0.447035	0.0709059	0.244218	0.414043	0.431519	0.475181	0.379414	0.297451	0.00937199	0.411661	0.0742783	0.177091
1.644	0.315572	0.459715	0.362442	0.376011	0.0111401	0.612261	0.300597	0.145408	0.318729	0.43488	0.02268	0.733231	0.478731	0.137728	0.130665	1.04158	0.22905	0.406245	0.116584	0.166592	0.280857	0.346038	0.744418	0.335355	0.34444	0.45956	0.491473	0.148553	0.356171	0.482604	0.628719	0.0400562	0.440719	0.438037	0.499601	0.464735	0.465484	0.400652	0.065569	0.23517	0.431217	0.429575	0.384051	0.352259	0.315802	0.0701417	0.395629	0.135086	0.199032
1.781	0.372702	0.469767	0.288167	0.3987	0.0516375	0.537368	0.356185	0.137571	0.270265	0.431627	0.0571253	0.679229	0.473757	0.126779	0.163252	0.97528	0.254243	0.393016	0.12472	0.19249	0.334487	0.371762	0.790592	0.363414	0.297705	0.51694	0.389883	0.209362	0.3303	0.482099	0.673299	0.0451136	0.429356	0.433703	0.555762	0.527959	0.351162	0.365659	0.100997	0.275225	0.396986	0.457401	0.42199	0.382763	0.322856	0.0783277	0.278895	0.125384	0.149543
1.918	0.436282	0.44942	0.258239	0.405514	0.0844909	0.547215	0.435251	0.121901	0.320229	0.484306	0.112161	0.719211	0.501671	0.0824379	0.225102	0.822835	0.301396	0.395418	0.173647	0.223118	0.39359	0.353225	0.748084	0.371005	0.293225	0.549034	0.322817	0.258878	0.299324	0.485161	0.730805	0.0623482	0.412416	0.413311	0.589966	0.567582	0.312801	0.326208	0.195745	0.27179	0.296957	0.449785	0.299572	0.370015	0.298895	0.0964938	0.291077	0.0828069	0.135823
2.055	0.510539	0.469314	0.309014	0.381374	0.10964	0.498942	0.449785	0.168011	0.344847	0.483541	0.177455	0.688614	0.495714	0.029363	0.271315	0.720706	0.334694	0.370035	0.25238	0.27387	0.352537	0.326179	0.649013	0.381648	0.287542	0.570959	0.260949	0.293073	0.268495	0.507601	0.755064	0.0771066	0.426587	0.381685	0.571986	0.576673	0.249058	0.265343	0.269037	0.186362	0.321426	0.451753	0.162173	0.400194	0.230435	0.0425684	0.252222	0.0959598	0.179037
2.192	0.520342	0.365504	0.395652	0.379398	0.189224	0.459596	0.397009	0.199473	0.346999	0.496497	0.203458	0.627329	0.472308	0.0106608	0.213691	0.640027	0.367322	0.335688	0.373845	0.33675	0.268476	0.351148	0.53982	0.381173	0.291604	0.601566	0.237542	0.353115	0.251349	0.532404	0.718243	0.0779589	0.456517	0.351112	0.515463	0.583907	0.195848	0.283097	0.307305	0.126249	0.261331	0.453029	0.0956163	0.308322	0.212538	0.128142	0.251142	0.0861064	0.219222
2.329	0.401032	0.334536	0.603343	0.384473	0.22141	0.480006	0.309945	0.186188	0.29375	0.492982	0.243711	0.635309	0.462939	0.0737113	0.211915	0.612972	0.376804	0.269215	0.521225	0.380682	0.171316	0.356064	0.444677	0.398253	0.279857	0.593526	0.224698	0.427847	0.268784	0.548721	0.641834	0.0780325	0.461682	0.313669	0.446945	0.599729	0.267919	0.269288	0.391802	0.086844	0.22346	0.45541	0.108387	0.40201	0.200362	0.0984285	0.311303	0.14633	0.275823
2.466	0.312977	0.343265	0.717671	0.342386	0.188317	0.548089	0.243776	0.188875	0.169724	0.473742	0.249998	0.651632	0.381469	0.176739	0.242217	0.603314	0.378683	0.213385	0.595732	0.416387	0.109866	0.361739	0.373889	0.445829	0.245815	0.614162	0.212817	0.457635	0.310946	0.556014	0.57555	0.0727962	0.445461	0.257442	0.377483	0.598935	0.311925	0.245671	0.442782	0.0724861	0.148197	0.430818	0.0965864	0.406223	0.203056	0.0961269	0.295387	0.186978	0.280068
2.603	0.287606	0.328292	0.745662	0.309377	0.131876	0.569989	0.214336	0.115756	0.128997	0.483922	0.203719	0.669138	0.353032	0.324195	0.297211	0.581864	0.408827	0.214257	0.595828	0.471073	0.117621	0.424061	0.340502	0.474431	0.171864	0.633273	0.203908	0.450975	0.359758	0.55716	0.526731	0.069324	0.426906	0.213074	0.313852	0.590559	0.31595	0.308748	0.389006	0.0225269	0.111576	0.389138	0.119857	0.505439	0.205323	0.138982	0.257046	0.174117	0.303469
2.74	0.332494	0.317314	0.6546	0.27596	0.0910991	0.529966	0.235047	0.166389	0.0986357	0.524278	0.15175	0.702964	0.375582	0.340302	0.358661	0.555666	0.454295	0.265153	0.567743	0.530403	0.133977	0.478061	0.334697	0.501812	0.163021	0.658343	0.192106	0.447156	0.399808	0.530861	0.491922	0.0655327	0.411702	0.194495	0.279703	0.60767	0.27598	0.296129	0.423069	0.027383	0.173886	0.426189	0.230887	0.430752	0.227604	0.146625	0.242346	0.184207	0.306263
2.877	0.41061	0.335015	0.512462	0.359918	0.0903958	0.469001	0.287998	0.153337	0.0938236	0.565231	0.122851	0.696282	0.384095	0.324374	0.351999	0.560136	0.484209	0.276803	0.500489	0.573921	0.164801	0.477209	0.311828	0.513335	0.121739	0.632131	0.189373	0.451728	0.39466	0.494386	0.438352	0.0641965	0.403547	0.199797	0.27176	0.655949	0.21476	0.295126	0.390956	0.0441287	0.275488	0.53762	0.287248	0.465086	0.26115	0.161816	0.213891	0.203828	0.321258
3.014	0.480546	0.326655	0.477492	0.476423	0.0730204	0.50029	0.389299	0.183102	0.0754519	0.551034	0.120792	0.665029	0.422743	0.377449	0.279037	0.596978	0.510256	0.267034	0.378216	0.602385	0.154829	0.430397	0.311129	0.529196	0.0862092	0.625653	0.203222	0.436075	0.334162	0.486363	0.382567	0.0699308	0.419387	0.210031	0.261335	0.715567	0.19842	0.330352	0.381664	0.0870519	0.270552	0.558415	0.232203	0.477072	0.281876	0.142283	0.259256	0.159156	0.293827
3.151	0.440006	0.348083	0.402062	0.459603	0.0653227	0.548259	0.53688	0.215979	0.066641	0.477787	0.169396	0.65647	0.441617	0.498012	0.160794	0.633016	0.545627	0.254787	0.243101	0.61604	0.104849	0.37914	0.339324	0.505133	0.107352	0.66074	0.202405	0.412115	0.222488	0.479324	0.372105	0.0770505	0.430579	0.217163	0.257431	0.74856	0.163536	0.350064	0.474465	0.0581125	0.177654	0.589851	0.193191	0.469343	0.321852	0.171882	0.252309	0.233812	0.301989
3.288	0.373237	0.317926	0.387651	0.512979	0.0925234	0.588298	0.640662	0.184772	0.0695974	0.501214	0.241614	0.65202	0.461801	0.497879	0.0529376	0.620156	0.571073	0.268514	0.138402	0.655873	0.0596896	0.349822	0.367342	0.467383	0.133069	0.661688	0.176653	0.408127	0.11658	0.474277	0.411968	0.0973469	0.435236	0.222547	0.273475	0.772702	0.146355	0.367944	0.495934	0	0.108129	0.539627	0.207527	0.516315	0.329116	0.212551	0.297931	0.312422	0.298719
3.425	0.245393	0.313149	0.360121	0.555881	0.103469	0.644058	0.576996	0.153871	0.0790794	0.535307	0.223771	0.638876	0.502808	0.368024	0.0502044	0.604643	0.546282	0.271768	0.0631622	0.724993	0.0594296	0.401838	0.38205	0.500051	0.136676	0.614935	0.157419	0.423091	0.0628526	0.473306	0.465855	0.110843	0.4215	0.221354	0.312885	0.776852	0.141553	0.37588	0.478598	0.0977697	0.0801003	0.570474	0.23611	0.514059	0.293455	0.174967	0.298494	0.286912	0.29645
3.562	0.3492	0.37908	0.331375	0.572136	0.177713	0.597856	0.366396	0.163374	0.0829191	0.554615	0.17664	0.604294	0.567188	0.208469	0.116399	0.605912	0.529981	0.22407	0.0175026	0.795675	0.0901869	0.437962	0.381832	0.555221	0.160233	0.629287	0.163935	0.420052	0.0709919	0.506928	0.531461	0.122771	0.409422	0.21355	0.363591	0.773068	0.142029	0.363558	0.517114	0.145055	0.15809	0.600036	0.220718	0.622724	0.282514	0.295346	0.250476	0.317445	0.249231
3.699	0.334949	0.457876	0.339542	0.658611	0.248505	0.57037	0.257117	0.201047	0.0867434	0.604081	0.149718	0.561192	0.666758	0.118429	0.161401	0.57674	0.567055	0.169494	0.0656812	0.868698	0.106674	0.440801	0.36023	0.57325	0.173891	0.64797	0.18262	0.414074	0.0962752	0.554075	0.599972	0.153571	0.415776	0.18573	0.398818	0.756883	0.130684	0.37417	0.636758	0.0976501	0.146335	0.670394	0.223324	0.605835	0.226105	0.301929	0.293157	0.199219	0.219717
3.836	0.280623	0.511926	0.240394	0.684412	0.219472	0.490654	0.187511	0.26304	0.0977506	0.62287	0.130766	0.553462	0.740498	0.0784884	0.248584	0.576571	0.632194	0.146895	0.208796	0.924156	0.124203	0.441937	0.348489	0.5845	0.182942	0.671883	0.19892	0.444287	0.112637	0.564298	0.604862	0.187272	0.433977	0.15226	0.376932	0.723916	0.133889	0.367452	0.678794	0.127192	0.194394	0.672887	0.24789	0.518319	0.239287	0.336638	0.370163	0.288323	0.201316
3.973	0.199788	0.56009	0.148462	0.618263	0.24023	0.526536	0.210333	0.352923	0.157192	0.645707	0.0889791	0.540395	0.743595	0.0558201	0.362005	0.600476	0.633285	0.128625	0.400751	0.982993	0.206506	0.44014	0.354467	0.608358	0.193188	0.649866	0.218995	0.475087	0.130293	0.565239	0.53317	0.184084	0.468494	0.139533	0.320915	0.700815	0.0830767	0.384085	0.626281	0.113713	0.262802	0.783941	0.172607	0.56097	0.257849	0.295994	0.381487	0.303854	0.202017
4.11	0.179999	0.631952	0.110988	0.620626	0.18047	0.527236	0.193256	0.448369	0.218454	0.662176	0.0457323	0.516754	0.696369	0.0368335	0.407597	0.577789	0.655109	0.0963954	0.514385	1.05294	0.345239	0.396731	0.346744	0.610388	0.160727	0.641302	0.226359	0.469259	0.128493	0.577688	0.485008	0.19986	0.510726	0.135204	0.300774	0.688296	0.0836866	0.415713	0.699974	0.226251	0.314189	0.816964	0.20652	0.523809	0.197693	0.230973	0.389476	0.337106	0.234726
4.247	0.167041	0.680897	0.180407	0.633936	0.0780725	0.524114	0.180213	0.551349	0.235579	0.656694	0.0196389	0.512628	0.659691	0.0498607	0.371393	0.559231	0.689319	0.066791	0.465668	1.12925	0.353906	0.420561	0.296597	0.637704	0.123839	0.647769	0.20445	0.458542	0.0937787	0.591974	0.48146	0.249673	0.538085	0.118471	0.336689	0.682755	0.178261	0.502331	0.676348	0.22121	0.336814	0.88932	0.377213	0.458907	0.169602	0.215048	0.31062	0.378223	0.281215
4.384	0.1658	0.661641	0.214536	0.70054	0.0593195	0.569308	0.189724	0.608311	0.223168	0.674351	0.0319113	0.507372	0.610207	0.0842852	0.332725	0.562604	0.642965	0.0858928	0.346615	1.17739	0.224686	0.418293	0.18858	0.627878	0.096394	0.608427	0.165139	0.464751	0.0561264	0.614226	0.502877	0.304365	0.545394	0.111494	0.382817	0.67015	0.170678	0.431687	0.662812	0.29434	0.246171	0.771376	0.452519	0.45113	0.146321	0.248596	0.166437	0.349786	0.189895
4.521	0.218208	0.685966	0.18914	0.731967	0.0589914	0.538993	0.158019	0.596578	0.186716	0.708207	0.061393	0.496848	0.535941	0.100484	0.317145	0.548415	0.637735	0.103526	0.221544	1.1753	0.136193	0.409309	0.131233	0.637905	0.057539	0.5503	0.122217	0.467317	0.0351794	0.62654	0.521351	0.362045	0.54786	0.130733	0.379299	0.66835	0.152801	0.434391	0.621056	0.294437	0.180297	0.899872	0.433529	0.500082	0.120095	0.308336	0.191956	0.389451	0.27748
4.658	0.308781	0.742272	0.188198	0.729464	0.0353404	0.52873	0.122619	0.66882	0.185668	0.685476	0.103093	0.533298	0.493699	0.086127	0.322779	0.571969	0.614618	0.109511	0.12569	1.18177	0.0697258	0.390111	0.173219	0.686571	0.0201614	0.517755	0.0660452	0.456583	0.0263004	0.617546	0.500387	0.402673	0.542757	0.136709	0.301433	0.696555	0.121609	0.440497	0.565984	0.298007	0.100179	0.949742	0.417316	0.554917	0.104919	0.356548	0.192542	0.346083	0.229187
4.795	0.340327	0.723547	0.182426	0.694418	0.0230304	0.476515	0.123175	0.730209	0.165992	0.732062	0.147915	0.562556	0.46941	0.0378439	0.304234	0.606295	0.572226	0.123679	0.118165	1.16899	0.0627527	0.436546	0.19971	0.681284	0.00497496	0.524313	0.0222305	0.464279	0.0313267	0.606894	0.444476	0.437584	0.549794	0.124337	0.201899	0.723319	0.0247937	0.335053	0.577898	0.34113	0.204586	0.824262	0.399402	0.599615	0.117544	0.267466	0.159264	0.346003	0.24205
4.932	0.291428	0.700113	0.155182	0.59391	0.0266984	0.471645	0.136804	0.7756	0.177835	0.674331	0.159361	0.53456	0.463701	0.00123954	0.234824	0.615803	0.532296	0.107104	0.147751	1.04381	0.0942281	0.412242	0.228732	0.650377	0.00561923	0.568293	0.0170377	0.509588	0.0529849	0.594283	0.424734	0.468223	0.576303	0.115463	0.158452	0.70868	0.129338	0.419541	0.601661	0.365197	0.240364	0.763483	0.325221	0.65616	0.0906138	0.268044	0.167555	0.373533	0.305734
5.069	0.201126	0.605725	0.130116	0.515784	0.0243096	0.525727	0.118656	0.787425	0.20485	0.565133	0.154235	0.514189	0.460225	0.0590935	0.150594	0.631979	0.520968	0.0613122	0.132207	0.881016	0.0776101	0.422739	0.209659	0.663798	0.0215977	0.616551	0.0324065	0.530442	0.0774147	0.559234	0.425348	0.479369	0.599009	0.099427	0.13125	0.691573	0.108368	0.361207	0.620042	0.406258	0.155528	0.674005	0.196268	0.626701	0.0420024	0.327226	0.239417	0.30199	0.289734
5.206	0.142218	0.562759	0.139222	0.501834	0.0692229	0.566948	0.118234	0.680549	0.197242	0.551835	0.154507	0.52176	0.452087	0.206682	0.12831	0.659274	0.514508	0.0393016	0.0656093	0.695086	0.0396197	0.476171	0.149128	0.729269	0.0563522	0.63702	0.0568832	0.556102	0.0893261	0.509098	0.42135	0.494433	0.631848	0.077943	0.105011	0.702878	0.025874	0.382012	0.639801	0.26775	0.125247	0.678439	0.113552	0.646318	0.0190767	0.327326	0.209733	0.270092	0.316709
5.343	0.0471723	0.539285	0.171431	0.437445	0.121584	0.588814	0.163455	0.581694	0.175192	0.513826	0.131983	0.54043	0.472184	0.339796	0.160276	0.681677	0.489399	0.0157583	0.0206107	0.688111	0.0328423	0.477777	0.124163	0.773528	0.0964546	0.691002	0.0835715	0.5766	0.0866209	0.47184	0.446061	0.514031	0.669444	0.0851622	0.101227	0.732799	0.0349294	0.42773	0.601543	0.147648	0.12045	0.636921	0.0190328	0.585055	0	0.27424	0.112451	0.324492	0.294832
5.48	0.0454603	0.510083	0.194722	0.474211	0.155152	0.623213	0.264457	0.525384	0.185079	0.502153	0.0755269	0.592289	0.514876	0.342576	0.152076	0.668677	0.476346	0.00499201	0.0288635	0.635184	0.0125124	0.440043	0.178804	0.747161	0.116601	0.751594	0.11077	0.596825	0.060375	0.451143	0.501217	0.51138	0.697342	0.123349	0.125481	0.791752	0	0.514407	0.555904	0.0680716	0.0621402	0.632262	0.0768716	0.568415	0.0176924	0.366593	0.121524	0.31283	0.249118
5.617	0.0691826	0.480579	0.199001	0.50911	0.174538	0.660299	0.199565	0.57117	0.185222	0.499366	0.056843	0.593144	0.554897	0.260906	0.0944139	0.618542	0.475086	0.00761695	0.0489224	0.564169	0	0.443733	0.261333	0.778136	0.108379	0.776675	0.130138	0.613232	0.0254279	0.441822	0.549444	0.503618	0.717253	0.160339	0.147611	0.883913	0.0459116	0.52897	0.605728	0.118223	0.0322547	0.620851	0.128625	0.526089	0.0556331	0.444765	0.0586387	0.289764	0.323003
5.754	0.1259	0.489164	0.137693	0.532977	0.155757	0.691458	0.170743	0.544416	0.179225	0.551779	0.102761	0.605824	0.630098	0.191834	0.0580611	0.60443	0.507978	0.025273	0.0438524	0.555754	0.0599521	0.507001	0.317938	0.719238	0.0858095	0.80545	0.131721	0.618735	0.00608373	0.440236	0.548287	0.517984	0.740208	0.159503	0.133066	0.978033	0.119465	0.534104	0.564723	0.214987	0.0316028	0.573391	0.084297	0.464704	0.080547	0.385875	0.121868	0.338517	0.278029
5.891	0.15365	0.438601	0.134581	0.557898	0.114114	0.758493	0.154467	0.550074	0.18909	0.604094	0.17084	0.685558	0.734069	0.139021	0.044388	0.634285	0.555797	0.0310878	0.0190273	0.582156	0.185002	0.516553	0.263821	0.679522	0.0724978	0.816266	0.12373	0.622615	0	0.455209	0.51344	0.521937	0.750266	0.141259	0.1255	1.03391	0.10488	0.693701	0.624732	0.241056	0	0.553901	0.0694329	0.426778	0.136235	0.43182	0.0661366	0.306584	0.295126
6.028	0.254237	0.408179	0.183253	0.607727	0.0790481	0.776744	0.202582	0.542772	0.211961	0.623218	0.194241	0.750064	0.784248	0.104469	0.0459488	0.60221	0.596577	0.0600751	0	0.58333	0.251925	0.514566	0.202198	0.69782	0.0727908	0.763927	0.102427	0.636157	0.00862534	0.482178	0.45362	0.528134	0.73681	0.118617	0.142797	1.08808	0.150748	0.639737	0.592445	0.26127	0.0322116	0.56526	0.122151	0.475478	0.126624	0.492273	0.014534	0.275704	0.27522
6.165	0.300268	0.461791	0.26797	0.545821	0.0373429	0.738272	0.332436	0.474865	0.206527	0.605771	0.165339	0.736811	0.753751	0.101842	0.0498107	0.573835	0.591344	0.0844151	0.0299217	0.587811	0.265935	0.488181	0.158117	0.730013	0.0695453	0.588402	0.0791353	0.63526	0.0304898	0.495476	0.387648	0.534187	0.706313	0.0854967	0.175449	1.12643	0.127733	0.621104	0.595208	0.407635	0.0948541	0.528933	0.0977892	0.468889	0.087137	0.451855	0.0218035	0.262773	0.300449
6.302	0.328906	0.464234	0.297756	0.534463	0.0204764	0.727081	0.354579	0.522811	0.199921	0.56056	0.155778	0.724437	0.712048	0.125622	0.0899256	0.615478	0.556841	0.109923	0.0621146	0.574414	0.259873	0.500759	0.114736	0.685622	0.0574615	0.452305	0.0712142	0.621135	0.0613589	0.49615	0.327689	0.542145	0.680325	0.051208	0.183046	1.15391	0.0651968	0.539361	0.629967	0.518346	0.163783	0.617395	0.022049	0.465274	0.108766	0.451428	0	0.345569	0.32739
6.439	0.355143	0.523191	0.275996	0.499563	0.0149666	0.701932	0.281215	0.562684	0.175676	0.533121	0.195491	0.715093	0.674548	0.170617	0.124906	0.648771	0.524411	0.127411	0.111293	0.596594	0.251273	0.554381	0.0967998	0.666713	0.0618019	0.459287	0.0808562	0.597562	0.0921641	0.491717	0.285398	0.539774	0.66455	0.0200539	0.171725	1.18281	0.206468	0.580375	0.678879	0.449721	0.129027	0.611477	0.0284726	0.49463	0.150109	0.475971	0.0887312	0.328477	0.328468
6.576	0.380485	0.612272	0.277912	0.426744	0.0629228	0.667567	0.189426	0.549075	0.230798	0.548907	0.247827	0.695017	0.565549	0.1281	0.124651	0.641631	0.579097	0.130436	0.0956216	0.639468	0.267825	0.57566	0.0894238	0.67559	0.0389422	0.482297	0.0804065	0.575608	0.117175	0.488817	0.260612	0.543674	0.674636	0	0.170372	1.18256	0.204745	0.658595	0.671504	0.300007	0.161629	0.623311	0	0.449973	0.23517	0.476449	0.0982682	0.390111	0.298121
6.713	0.311265	0.628801	0.189318	0.423539	0.0477128	0.642515	0.156773	0.50758	0.342581	0.598638	0.291144	0.686773	0.513735	0.0704157	0.126609	0.631785	0.612483	0.120515	0.0553866	0.648094	0.250427	0.567527	0.0533747	0.60063	0	0.464726	0.0599768	0.547089	0.134916	0.492939	0.230807	0.561533	0.713618	0.00194471	0.164697	1.14775	0.236748	0.596219	0.625372	0.21056	0.257855	0.683985	0.0383142	0.398972	0.256818	0.521128	0.104374	0.332693	0.204056
6.85	0.179333	0.641452	0.295265	0.479104	0.0711741	0.687558	0.160222	0.530113	0.413604	0.639598	0.304463	0.690467	0.468242	0.0591545	0.105485	0.633759	0.580313	0.126741	0.0319929	0.659231	0.217257	0.588144	0.0368776	0.523366	0.00317293	0.471587	0.0339522	0.522291	0.136538	0.498614	0.224723	0.579406	0.739835	0.0322089	0.146618	1.09999	0.254929	0.500008	0.668113	0.129658	0.275854	0.739109	0.0164713	0.407339	0.322407	0.622064	0.169166	0.334401	0.23678
6.987	0.101673	0.649701	0.308695	0.492903	0.0990423	0.674466	0.180748	0.573072	0.414643	0.675848	0.273068	0.675317	0.426503	0.0277909	0.0627227	0.65715	0.558284	0.140929	0.0341068	0.653236	0.171576	0.602329	0.0652892	0.53238	0.0288107	0.516803	0.018551	0.505256	0.102973	0.499757	0.221653	0.577161	0.759078	0.070565	0.131402	1.06644	0.206538	0.52968	0.730633	0.149376	0.405575	0.753146	0.00320122	0.403417	0.325516	0.711633	0.211758	0.372958	0.288185
7.124	0.109249	0.583829	0.322015	0.46602	0.0979104	0.620576	0.22108	0.577082	0.410139	0.709501	0.236533	0.689952	0.399621	0.0669963	0.0544197	0.690679	0.53687	0.153156	0.0847672	0.635034	0.0796307	0.598548	0.113864	0.547357	0.0614991	0.543652	0.0100895	0.489043	0.0541301	0.496203	0.233423	0.560214	0.80439	0.0923471	0.145	1.03455	0.207903	0.586187	0.792815	0.207187	0.383663	0.720969	0.0106425	0.363037	0.248635	0.590254	0.267163	0.376862	0.294376
7.261	0.113388	0.479927	0.263094	0.515979	0.10751	0.5825	0.233288	0.604577	0.45675	0.757962	0.220561	0.704323	0.429074	0.112035	0.102178	0.729838	0.525751	0.164366	0.147927	0.641197	0.0352541	0.535277	0.152007	0.569523	0.0525495	0.525633	0	0.470033	0.0219735	0.495773	0.249395	0.540132	0.865081	0.0915345	0.177984	0.967242	0.210885	0.692764	0.819023	0.242012	0.392706	0.889912	0.101448	0.440151	0.213674	0.55854	0.289892	0.352304	0.297533
7.398	0.117264	0.487395	0.121359	0.613387	0.10549	0.56629	0.131462	0.616679	0.511086	0.816703	0.180053	0.714332	0.496492	0.107691	0.1355	0.745265	0.525835	0.171296	0.194767	0.649319	0.0298461	0.48771	0.172346	0.593309	0.0322549	0.494362	0.00327091	0.466923	0.0261487	0.500394	0.264851	0.524129	0.919217	0.0795489	0.205032	0.897569	0.328451	0.787264	0.91385	0.186617	0.300635	0.720493	0.186744	0.437604	0.163744	0.527851	0.213855	0.293008	0.320047
7.535	0.0979273	0.53345	0.00984352	0.58813	0.0790191	0.568234	0.103165	0.644985	0.582204	0.835427	0.147137	0.820698	0.52001	0.0886246	0.144825	0.715305	0.555138	0.165791	0.233379	0.640874	0.0525234	0.4722	0.172171	0.64306	0.0353503	0.502611	0.0208858	0.505433	0.0546635	0.510346	0.244101	0.513375	0.980968	0.0672867	0.212393	0.81728	0.441384	0.770483	0.890779	0.0815981	0.23951	0.760619	0.241754	0.422405	0.119457	0.508791	0.308677	0.327167	0.317964
7.672	0.0753038	0.492485	0	0.664404	0.0663139	0.480014	0.180553	0.693462	0.664799	0.835204	0.135262	0.898333	0.549291	0.0762365	0.16156	0.711775	0.566378	0.147072	0.27154	0.643443	0.106609	0.419806	0.145636	0.686977	0.0511689	0.535774	0.0325686	0.519215	0.0705818	0.529193	0.169817	0.510703	1.0215	0.0825742	0.216214	0.756865	0.423689	0.684474	0.989456	0.127818	0.145782	0.827324	0.258937	0.392407	0.099847	0.468202	0.314141	0.28588	0.337458
7.809	0.135313	0.469307	0.047485	0.728345	0.103552	0.477943	0.222253	0.649298	0.730163	0.859594	0.17696	0.990761	0.595873	0.0567659	0.156771	0.727852	0.562635	0.128561	0.29202	0.690152	0.178289	0.337812	0.103521	0.719644	0.0637686	0.546417	0.0467159	0.527213	0.0587699	0.539238	0.0932078	0.511755	1.00016	0.13286	0.248654	0.770785	0.308604	0.632647	0.913647	0.137991	0.130001	0.768978	0.235352	0.368578	0.129184	0.42086	0.300343	0.353408	0.354349
7.946	0.20599	0.447437	0.0993965	0.76348	0.122001	0.489349	0.183805	0.686019	0.655134	0.849995	0.16463	1.10945	0.632137	0.0297915	0.135292	0.73068	0.582459	0.116363	0.260952	0.709926	0.225206	0.304616	0.0528517	0.745537	0.0683899	0.552011	0.06651	0.545721	0.0393925	0.534422	0.0300552	0.519944	0.93936	0.181307	0.259507	0.80187	0.174142	0.604938	0.887372	0.136933	0.154313	0.679772	0.186102	0.370466	0.113642	0.394171	0.222815	0.466853	0.315718
8.083	0.241729	0.487686	0.246958	0.788364	0.0514991	0.447424	0.0898535	0.682657	0.578735	0.855097	0.129548	1.2335	0.65116	0.0281991	0.116023	0.744691	0.592897	0.134622	0.195319	0.722121	0.246058	0.281257	0.0428997	0.761937	0.041064	0.545859	0.0759703	0.557932	0.0233984	0.52959	0.00803652	0.516188	0.852227	0.215081	0.221445	0.816921	0.141819	0.61554	0.820701	0.116846	0.175312	0.664882	0.0918361	0.287634	0.12001	0.43086	0.151581	0.369825	0.304704
8.22	0.23361	0.518635	0.382775	0.829427	0.010169	0.378671	0.07921	0.669398	0.574599	0.852733	0.0931335	1.30054	0.661712	0.0189478	0.101859	0.758099	0.601386	0.136789	0.127172	0.788219	0.304054	0.28135	0.0843622	0.767767	0.0182988	0.527719	0.0737306	0.562274	0.010937	0.522277	0	0.498613	0.759963	0.24732	0.146459	0.817431	0.132103	0.555073	0.748232	0.125373	0.19088	0.715665	0.0986404	0.220775	0.14946	0.440267	0.246372	0.422069	0.286597
8.357	0.213136	0.475802	0.41472	0.812823	0.076387	0.464216	0.0750004	0.765865	0.591376	0.849185	0.0576649	1.28531	0.70068	0	0.122838	0.776102	0.621338	0.122587	0.08083	0.890594	0.342307	0.3084	0.125341	0.766613	0.0322379	0.495196	0.0939377	0.558024	0.0117099	0.516906	0.0156197	0.491031	0.686115	0.262376	0.063957	0.821755	0.178476	0.514262	0.706049	0.09487	0.242452	0.648296	0.150436	0.266798	0.168588	0.50562	0.25467	0.418885	0.306268
8.494	0.18433	0.579572	0.464816	0.893391	0.112846	0.498958	0.0504596	0.712541	0.577085	0.834439	0.0223347	1.21473	0.707405	0.0166923	0.14641	0.748769	0.606429	0.072348	0.0734995	0.969457	0.289719	0.294403	0.123117	0.743772	0.0692134	0.481395	0.0986397	0.57035	0.0186993	0.519674	0.0664871	0.484977	0.628139	0.244018	0.0042917	0.85806	0.177837	0.589235	0.680645	0.152221	0.341834	0.635453	0.209972	0.26135	0.199422	0.371236	0.244503	0.381119	0.325748
8.631	0.162312	0.616702	0.400966	0.869665	0.119135	0.580441	0.0958864	0.668562	0.451833	0.830303	0.0184375	1.13591	0.684119	0.0530676	0.131657	0.782323	0.603627	0.0293147	0.0925722	1.01073	0.258831	0.223473	0.114169	0.709275	0.114514	0.475744	0.105346	0.577903	0.0236663	0.540856	0.145775	0.483466	0.597413	0.192379	0	0.897157	0.289515	0.528812	0.691844	0.139856	0.232729	0.564929	0.385949	0.250521	0.211011	0.404086	0.285758	0.419581	0.274774
8.768	0.160619	0.663336	0.308109	0.747191	0.099328	0.56716	0.124051	0.654746	0.324166	0.832893	0.0588896	1.08435	0.671156	0.0642346	0.0668313	0.809194	0.616856	0.0146342	0.120241	1.02783	0.164605	0.231228	0.0827907	0.678843	0.150162	0.478429	0.115152	0.620921	0.0367087	0.570593	0.198904	0.492188	0.597433	0.128885	0.0267859	0.898265	0.334416	0.569276	0.81751	0.232892	0.146195	0.582031	0.390382	0.232966	0.252705	0.370839	0.272128	0.360606	0.254255
8.905	0.209703	0.734159	0.21379	0.647739	0.0701449	0.569162	0.103648	0.661377	0.185057	0.843834	0.122056	1.0028	0.624568	0.050655	0.0235842	0.761096	0.613007	0.0283673	0.158976	1.0543	0.132087	0.257143	0.0547702	0.588633	0.161216	0.503009	0.125112	0.701193	0.0423111	0.580856	0.167667	0.497032	0.603029	0.0809469	0.0517605	0.881642	0.416974	0.567945	0.757065	0.280146	0.101008	0.525382	0.213924	0.272643	0.362728	0.417563	0.310745	0.314936	0.324973
9.042	0.151654	0.744163	0.169555	0.63372	0.053783	0.541129	0.0411648	0.687829	0.114909	0.79755	0.15171	0.84758	0.568456	0.0389449	0	0.747188	0.608817	0.0479152	0.213965	1.0881	0.0718108	0.245603	0.0247456	0.50927	0.143627	0.504606	0.139313	0.766853	0.0401939	0.562699	0.109241	0.492507	0.591844	0.0573015	0.067492	0.875337	0.38428	0.624881	0.555569	0.158062	0.117616	0.540195	0.141811	0.262056	0.368299	0.388779	0.281827	0.364636	0.336247
9.179	0.155914	0.754573	0.142171	0.574372	0.0394794	0.592213	0.0420813	0.685278	0.124507	0.769188	0.237562	0.634653	0.551932	0.0374579	0.0200443	0.738524	0.610055	0.0420656	0.293081	1.09998	0.0424228	0.268585	0	0.490832	0.129913	0.453757	0.160647	0.787391	0.0358243	0.537524	0.0917759	0.489751	0.559829	0.0512851	0.0705541	0.879037	0.328031	0.590387	0.569686	0.144276	0.096026	0.536432	0.170061	0.190149	0.364193	0.433609	0.233533	0.355639	0.405955
9.316	0.162575	0.73079	0.11717	0.573643	0.025274	0.627832	0.0250547	0.696731	0.144727	0.791556	0.454595	0.559962	0.553856	0.0395305	0.0615118	0.73561	0.587637	0.0212168	0.32766	1.06096	0.0628171	0.276811	0.00947053	0.496935	0.129967	0.427216	0.186161	0.781946	0.0261273	0.528787	0.127489	0.494093	0.53525	0.0523465	0.0703532	0.870843	0.409136	0.686655	0.570099	0.197116	0.123829	0.430792	0.139159	0.171553	0.434275	0.402242	0.158732	0.367886	0.400436
9.453	0.168974	0.662761	0.124275	0.630258	0.0482799	0.637329	0	0.772681	0.111403	0.781741	0.484107	0.584489	0.539368	0.0399222	0.0881757	0.723891	0.568663	0.00644935	0.296011	0.985599	0.194124	0.264708	0.0666847	0.494695	0.129591	0.445148	0.203028	0.774376	0.0274574	0.541375	0.137235	0.501854	0.530117	0.0502688	0.0740821	0.825819	0.500736	0.730034	0.576145	0.124022	0.208937	0.447977	0.111313	0.169167	0.503867	0.458207	0.157114	0.364138	0.40124
9.59	0.209748	0.712783	0.192511	0.624773	0.102708	0.62891	0.018899	0.819115	0.118233	0.815666	0.410118	0.559586	0.527092	0.048562	0.10667	0.708739	0.536859	0	0.218974	0.933881	0.379646	0.257711	0.15419	0.490562	0.110762	0.460835	0.20671	0.770937	0.0390132	0.55683	0.1252	0.464148	0.512023	0.062947	0.0762433	0.761744	0.480416	0.753158	0.576624	0.191915	0.276678	0.480286	0.0883256	0.144597	0.488594	0.473057	0.0413056	0.340532	0.438287
9.727	0.306678	0.72306	0.211764	0.597615	0.161668	0.566274	0.00232576	0.736166	0.173019	0.777434	0.347209	0.526724	0.517835	0.0736725	0.149964	0.715136	0.507773	0.00290018	0.133684	0.876732	0.512776	0.218841	0.27159	0.508321	0.0919277	0.464942	0.209386	0.757117	0.0407013	0.582174	0.0971195	0.453752	0.48188	0.0781595	0.0730133	0.735826	0.40439	0.777977	0.593544	0.14722	0.310607	0.424612	0.193971	0.104671	0.410484	0.500715	0.081582	0.371281	0.443998
9.864	0.322323	0.718213	0.152942	0.610833	0.240747	0.596736	0.007411	0.687272	0.200199	0.797166	0.284931	0.528792	0.480897	0.106584	0.224649	0.742063	0.470999	0.0129016	0.1114	0.857074	0.488729	0.167867	0.381309	0.530278	0.0990462	0.467771	0.22392	0.746431	0.0317464	0.602709	0.0847204	0.45774	0.471158	0.0745745	0.064664	0.745903	0.427849	0.764231	0.600913	0.103132	0.240753	0.510707	0.24767	0.0662984	0.422122	0.481087	0.092206	0.387885	0.393304
10.001	0.276486	0.619493	0.115667	0.495766	0.265664	0.531459	0.0386328	0.696617	0.193659	0.829043	0.22307	0.517157	0.431147	0.105705	0.258382	0.735042	0.462122	0.0323626	0.0911354	0.813893	0.392743	0.139304	0.332776	0.56342	0.110452	0.451694	0.233461	0.711893	0.0329129	0.604773	0.0730372	0.433936	0.478125	0.067396	0.0574426	0.776697	0.412551	0.722278	0.577288	0.0354532	0.149435	0.542732	0.33382	0.0698523	0.350058	0.573344	0.108666	0.399083	0.423425
10.138	0.255726	0.508347	0.113141	0.570068	0.200183	0.477928	0.0246439	0.691191	0.15781	0.788076	0.189596	0.488787	0.404029	0.0675376	0.218946	0.729685	0.465117	0.0461015	0.0467072	0.771628	0.280337	0.146682	0.308074	0.48419	0.120666	0.407942	0.277958	0.670212	0.0562449	0.622794	0.0758168	0.431818	0.499635	0.0761612	0.0707646	0.761691	0.369474	0.799072	0.575827	0.0879587	0.103342	0.641964	0.539301	0.113622	0.285774	0.612672	0.118997	0.436738	0.539382
10.275	0.269366	0.540369	0.160358	0.56424	0.105235	0.466652	0.0461682	0.691375	0.171961	0.771624	0.201066	0.467463	0.411933	0.0380176	0.170698	0.731107	0.441763	0.0208227	0.041408	0.748397	0.195296	0.138736	0.309558	0.507505	0.135903	0.40303	0.330129	0.640353	0.118455	0.643342	0.0962772	0.467725	0.528885	0.0975209	0.113779	0.713065	0.334335	0.719921	0.590961	0.0912039	0.115262	0.625206	0.735437	0.112243	0.302561	0.566395	0.126802	0.436381	0.530406
10.412	0.2753	0.545176	0.215478	0.544239	0.0515215	0.40414	0.0575728	0.584222	0.205879	0.763306	0.231692	0.471999	0.405517	0.0471211	0.129265	0.723031	0.413848	0.0143184	0.0704367	0.748251	0.160955	0.0952341	0.329809	0.520789	0.162146	0.430387	0.370716	0.60853	0.183792	0.639735	0.114122	0.455853	0.554233	0.131484	0.176787	0.686372	0.333309	0.654736	0.527969	0.0358117	0.0816858	0.708867	0.814217	0.124257	0.283656	0.569385	0.101426	0.5101	0.574954
10.549	0.230884	0.522355	0.236316	0.468143	0.0430692	0.438112	0.0983464	0.560229	0.272157	0.714451	0.246687	0.495419	0.399932	0.0832544	0.141738	0.697856	0.406319	0.0259712	0.0974236	0.752848	0.172358	0.154815	0.322521	0.547968	0.177483	0.438594	0.387604	0.579893	0.210975	0.641839	0.110373	0.444297	0.567821	0.167203	0.242113	0.706945	0.304847	0.636326	0.560039	0.170027	0.170355	0.745167	0.799448	0.156843	0.331085	0.612541	0.0921867	0.505017	0.588522
10.686	0.175398	0.528566	0.260248	0.419838	0.110857	0.408459	0.149588	0.619182	0.303208	0.692228	0.239738	0.506636	0.42768	0.143887	0.252733	0.6723	0.39557	0.0187715	0.143352	0.721546	0.184544	0.160299	0.277612	0.570267	0.157571	0.430815	0.419647	0.552389	0.217338	0.632112	0.109506	0.487934	0.574924	0.200237	0.269855	0.762787	0.286132	0.569065	0.568711	0.180256	0.265488	0.755772	0.645145	0.206491	0.40954	0.625315	0.0418058	0.38462	0.543847
10.823	0.116033	0.474003	0.259546	0.386233	0.210274	0.454723	0.145379	0.593703	0.352186	0.724003	0.185717	0.509651	0.457363	0.271214	0.455824	0.696788	0.388611	0.00536866	0.186155	0.679845	0.188649	0.0962727	0.126257	0.509133	0.137473	0.426784	0.496316	0.524369	0.207252	0.640241	0.140983	0.556174	0.595871	0.224952	0.230279	0.775487	0.318156	0.60295	0.57026	0.308654	0.350051	0.76054	0.532883	0.241283	0.429259	0.543957	0.141476	0.466545	0.498148
10.96	0.131048	0.475053	0.278912	0.407117	0.125508	0.418391	0.120931	0.584108	0.356301	0.717139	0.140592	0.494028	0.475602	0.378159	0.660516	0.704253	0.406754	0.0538257	0.243018	0.633837	0.224815	0.0712136	0.0960568	0.516724	0.122826	0.401312	0.620637	0.495435	0.189776	0.610751	0.173692	0.636216	0.643238	0.237778	0.148855	0.752076	0.425758	0.692514	0.533073	0.310907	0.405337	0.722543	0.532669	0.312217	0.371153	0.433528	0.155748	0.507082	0.485795
11.097	0.0688274	0.474246	0.289614	0.466041	0.108332	0.324816	0.171638	0.65535	0.300411	0.665455	0.102752	0.526742	0.463287	0.379444	0.634347	0.726777	0.433662	0.106278	0.322065	0.614866	0.246972	0.0772654	0.0772477	0.556778	0.120639	0.374759	0.758689	0.471621	0.174717	0.544206	0.181022	0.716455	0.68982	0.263152	0.101357	0.743412	0.546398	0.76265	0.417998	0.187778	0.545966	0.652145	0.463392	0.402761	0.298533	0.433925	0.128837	0.489789	0.429111
11.234	0.0716618	0.468175	0.288798	0.45784	0.124792	0.439509	0.230406	0.721491	0.179175	0.629107	0.0512175	0.506072	0.439133	0.294082	0.446398	0.747497	0.441847	0.111047	0.340943	0.57013	0.219082	0.0891823	0.0625397	0.568369	0.131558	0.362126	0.844107	0.434463	0.178043	0.514122	0.169215	0.758398	0.719133	0.304761	0.0833985	0.743507	0.611218	0.786466	0.454224	0.164729	0.668055	0.554612	0.378661	0.432975	0.259078	0.488725	0.140057	0.49	0.42793
11.371	0.076187	0.563139	0.269953	0.382956	0.0789789	0.304787	0.270407	0.778615	0.0995001	0.57716	0.0645043	0.448555	0.458289	0.216604	0.241226	0.771797	0.420767	0.127014	0.278727	0.55329	0.19093	0.0855885	0.0432931	0.556239	0.130255	0.308941	0.864904	0.396707	0.156349	0.532394	0.165014	0.804686	0.721536	0.350535	0.0767659	0.708537	0.571017	0.71189	0.435945	0.116506	0.796572	0.527313	0.340471	0.475522	0.330924	0.576701	0.163534	0.481834	0.367746
11.508	0.152312	0.571392	0.279645	0.319146	0.162003	0.34391	0.27753	0.814965	0.0838195	0.564135	0.11072	0.383549	0.455948	0.181359	0.114486	0.799701	0.424682	0.135503	0.279185	0.576841	0.170078	0.0502189	0.0564297	0.521875	0.146517	0.19981	0.827913	0.357532	0.133707	0.5481	0.154401	0.791352	0.710092	0.388593	0.0856188	0.656463	0.54546	0.635171	0.544869	0.224681	0.957752	0.551302	0.280076	0.484388	0.348219	0.54352	0.193442	0.540522	0.413622
11.645	0.18589	0.532215	0.257648	0.28565	0.182763	0.395648	0.234677	0.877979	0.0630375	0.524678	0.129875	0.343485	0.453781	0.177763	0.0846236	0.835066	0.450519	0.137629	0.273731	0.587444	0.151702	0.0347083	0.0506252	0.536851	0.214558	0.100203	0.773025	0.316045	0.133714	0.581437	0.140228	0.751331	0.706632	0.407785	0.112811	0.581964	0.426669	0.638876	0.551824	0.27627	0.849427	0.495519	0.280394	0.414434	0.352807	0.540821	0.182659	0.516276	0.45013
11.782	0.197567	0.585016	0.266587	0.295995	0.147543	0.369163	0.202901	0.956524	0.105196	0.492315	0.134692	0.306794	0.431425	0.202421	0.0812499	0.849061	0.447172	0.175949	0.278545	0.615418	0.165908	0.055703	0.0570407	0.526756	0.309753	0.0439497	0.741861	0.29272	0.135511	0.620185	0.133789	0.717952	0.707113	0.412091	0.150843	0.503553	0.372272	0.601624	0.606486	0.404402	0.626952	0.458756	0.365959	0.404492	0.308002	0.524208	0.279076	0.503843	0.359678
11.919	0.267391	0.55734	0.325864	0.255141	0.220273	0.333878	0.215767	1.04497	0.178425	0.506703	0.126926	0.26958	0.382577	0.261545	0.0885659	0.782945	0.426282	0.196389	0.268717	0.60085	0.159586	0.07443	0.0487922	0.518622	0.375399	0.0117042	0.71604	0.295911	0.130402	0.652442	0.147132	0.718093	0.695692	0.415875	0.168648	0.424999	0.421083	0.536395	0.646063	0.412777	0.459337	0.41783	0.432328	0.424177	0.316523	0.53061	0.281783	0.440149	0.342159
12.056	0.304677	0.526413	0.557832	0.231726	0.171058	0.307085	0.240502	1.16079	0.199315	0.527019	0.134087	0.235048	0.337492	0.342954	0.139155	0.734031	0.450355	0.173686	0.250906	0.642575	0.205267	0.0801009	0.0779027	0.504252	0.381287	0	0.735456	0.280254	0.125115	0.649205	0.164008	0.731554	0.682391	0.441459	0.156159	0.356011	0.402751	0.579235	0.613487	0.470001	0.288786	0.391936	0.500405	0.485047	0.307437	0.563565	0.283505	0.45311	0.396014
12.193	0.33584	0.475997	0.76868	0.280665	0.136629	0.308067	0.268225	1.11195	0.16748	0.601064	0.165103	0.206351	0.309182	0.388976	0.243995	0.71503	0.486652	0.120805	0.232928	0.634636	0.24593	0.0590128	0.103345	0.515301	0.333659	0.00563594	0.819293	0.262636	0.147724	0.644802	0.150992	0.706754	0.666904	0.506724	0.128463	0.30783	0.378713	0.537474	0.549513	0.352105	0.273921	0.316442	0.514881	0.497979	0.297795	0.504494	0.27978	0.416573	0.310248
12.33	0.428216	0.527607	0.99371	0.259698	0.152464	0.356702	0.243437	1.00776	0.16483	0.631375	0.198905	0.192619	0.287491	0.36263	0.373332	0.678648	0.512541	0.107735	0.199262	0.631492	0.304317	0.0562708	0.0755443	0.492866	0.296402	0.0141809	0.942371	0.258786	0.166101	0.645651	0.133224	0.650137	0.646675	0.605098	0.106727	0.287749	0.430495	0.534811	0.492659	0.301067	0.30304	0.324841	0.455242	0.421087	0.30641	0.520454	0.256933	0.398252	0.350247
12.467	0.516629	0.583313	0.977828	0.227898	0.199554	0.368901	0.209304	0.864208	0.124622	0.634461	0.221951	0.188681	0.264868	0.281325	0.420658	0.605415	0.539536	0.091218	0.1617	0.598196	0.394244	0.0429344	0.0448206	0.434579	0.280438	0.018698	1.06293	0.256498	0.180101	0.660829	0.109444	0.582058	0.620566	0.700166	0.130465	0.286233	0.626371	0.50429	0.464231	0.272497	0.319714	0.309944	0.340691	0.433258	0.328953	0.501776	0.211046	0.389376	0.317199
12.604	0.468638	0.59996	1.03447	0.227528	0.237129	0.385531	0.2197	0.779356	0.0572771	0.616909	0.236332	0.15834	0.241752	0.188721	0.3559	0.593158	0.532541	0.0909688	0.147458	0.599676	0.471527	0.0415185	0.0477021	0.412349	0.259877	0.0323403	1.17202	0.261712	0.20183	0.672356	0.0879261	0.572213	0.597992	0.721011	0.186983	0.297156	0.698411	0.531722	0.419147	0.331012	0.399233	0.292161			0.330985	0.458237	0.208065	0.424069	0.342997
12.741	0.374205	0.514488	0.957931	0.204661	0.262186	0.35144	0.216571	0.715162	0.0114232	0.672047	0.326019	0.150184	0.218757	0.129289	0.312791	0.557949	0.531728	0.136818	0.149204	0.616387	0.493293	0.0294112	0.0626717	0.425296	0.23369	0.0502493	1.21522	0.258189	0.188352	0.66721	0.0686102	0.576165	0.591025	0.648021	0.267771	0.321456	0.824514	0.515622	0.43455	0.342135	0.494488	0.270318			0.39391	0.470474	0.214521	0.424276	0.358237
12.878	0.275307	0.51663	0.769281	0.137447	0.385951	0.27513	0.198423	0.601724	0	0.747175	0.459253	0.148063	0.205576	0.105662	0.251225	0.507384	0.530549	0.193982	0.168076	0.609071	0.484299	0.00558108	0.0498822	0.478633	0.200774	0.0569359	1.20663	0.245346	0.159218	0.662021	0.0411091	0.526868	0.579794	0.537123	0.326377	0.319857	0.75336	0.57678	0.427451	0.514324	0.469831	0.235528			0.417436	0.419518	0.222712	0.311108	0.37901
13.015	0.192142	0.564565	0.577072	0.155486	0.442096	0.264948	0.20501	0.578055	0.0195512	0.699111	0.568766	0.16956	0.188526	0.105494	0.172925	0.49815	0.526982	0.228207	0.213373	0.593245	0.419722	0	0.0594407	0.505812	0.175124	0.0550054	1.09899	0.226574	0.158336	0.667438	0.0378514	0.477535	0.55438	0.439945	0.355284	0.308696	0.67254	0.566118	0.392124	0.635902	0.480275	0.199066			0.448669	0.509871	0.220285	0.366717	0.383495
13.152	0.182073	0.507975	0.463602	0.120611	0.376028	0.274345	0.214841	0.734566	0.0539253	0.664385	0.552409	0.188972	0.161717	0.136305	0.162267	0.525613	0.542375	0.253721	0.277026	0.587141	0.375996	0.0157945	0.0922173	0.496661	0.17081	0.0555288	0.931475	0.210391	0.173107	0.660578	0.0657563	0.496905	0.533984	0.36402	0.361792	0.302584	0.496235	0.520589	0.4579	0.751682	0.463598	0.190396			0.542273	0.517138	0.309642	0.401541	0.384422
13.289	0.310737	0.439345	0.403884	0.0815302	0.344773	0.268467	0.24002	0.855722	0.0973261	0.720179	0.466908	0.199692	0.140592	0.172479	0.167023	0.580499	0.558577	0.270418	0.388087	0.588801	0.426044	0.01012	0.122679	0.51557	0.180113	0.063501	0.771531	0.19354	0.187235	0.611138	0.104564	0.512092	0.512392	0.324278	0.37818	0.311002	0.429536	0.582217	0.483229	0.968764	0.463322	0.198805			0.56064	0.486886	0.323916	0.302619	0.368516
13.426	0.256475	0.393788	0.461899	0.0915426	0.412841	0.28413	0.234821	0.914354	0.135886	0.779991	0.387858	0.195578	0.136998	0.181016	0.214528	0.615784	0.582309	0.302404	0.548353	0.578205	0.633656	0.00444546	0.149302	0.48392	0.18868	0.0831471	0.635636	0.192905	0.21262	0.538392	0.152463	0.506235	0.498361	0.319025	0.36938	0.332433	0.448459	0.56962	0.522766	0.927228	0.533125	0.212329			0.560314	0.561003	0.322911	0.316936	0.336365
13.563	0.237119	0.398138	0.470823	0.0971548	0.507227	0.314434	0.250046	0.918733	0.163806	0.816644	0.337947	0.197742	0.153415	0.170887	0.291328	0.637658	0.612461	0.387627	0.693702	0.546992	0.88382	0.040099	0.144587	0.459724	0.182317	0.118358	0.570382	0.210215	0.242401	0.468966	0.195698	0.489393	0.511301	0.32883	0.384257	0.33961	0.328607	0.466941	0.619421	0.776199	0.65511	0.208662			0.487514	0.527957	0.303678	0.293587	0.355001
13.7	0.375437	0.432677	0.487222	0.0894367	0.536457	0.308175	0.260793	0.855885	0.190961	0.879361	0.321629	0.234392	0.183314	0.17303	0.349473	0.683463	0.648755	0.461826	0.7506	0.518031	1.01343	0.0861563	0.13813	0.480394	0.174642	0.142689	0.598921	0.24996	0.258362	0.423209	0.194202	0.45667	0.529297	0.325436	0.420778	0.314407	0.383305	0.503372	0.560624	0.468507	0.631676	0.253943			0.484016	0.509308	0.337385	0.333494	0.378613
13.837	0.495407	0.436949	0.549934	0.0923507	0.502061	0.359504	0.241676	0.786847	0.194063	0.966993	0.303106	0.263495	0.217278	0.186096	0.38505	0.730113	0.663825	0.437515	0.738018	0.494358	0.991601	0.119539	0.153884	0.446983	0.218283	0.155523	0.59458	0.28295	0.270401	0.391599	0.137537	0.402175	0.539654	0.296527	0.468694	0.277536	0.374507	0.440674	0.58312	0.24646	0.816708	0.230902			0.407684	0.480755	0.307475	0.326391	0.262863
13.974	0.607855	0.406575	0.546786	0.0886765	0.572639	0.315354	0.22534	0.738252	0.133152	1.0227	0.294993	0.26805	0.27224	0.17656	0.381803	0.738664	0.628663	0.449012	0.671636	0.458136	0.856255	0.187349	0.180202	0.410178	0.29817	0.187146	0.540436	0.308322	0.274638	0.360432	0.0822554	0.331318	0.559277	0.247232	0.497974	0.265739	0.546556	0.463097	0.614734	0.126332	0.933386	0.264686			0.43503	0.50657	0.300942	0.341423	0.322674
14.111	0.58562	0.444237	0.567253	0.0682614	0.722227	0.330048	0.204557	0.604415	0.130468	1.1015	0.285344	0.28013	0.310147	0.151176	0.346804	0.704348	0.567407	0.447531	0.596692	0.408551	0.706834	0.201911	0.184347	0.38517	0.359735	0.22659	0.512647	0.334757	0.259505	0.343124	0.0545017	0.32685	0.57591	0.205136	0.475904	0.276515	0.553607	0.537329	0.628871	0.130957	0.933155	0.283369			0.422999	0.490881	0.309618	0.263498	0.249858
14.248	0.57056	0.440986	0.628045	0.0655187	0.764135	0.294478	0.239679	0.494852	0.113948	1.13442	0.268034	0.294662	0.278566	0.13308	0.303996	0.645748	0.504773	0.41952	0.542217	0.34427	0.637826	0.252981	0.171124	0.370869	0.40798	0.248709	0.524198	0.368276	0.22736	0.332541	0.0412602	0.335127	0.583724	0.178328	0.454932	0.283141	0.570036	0.462646	0.674192	0.0844146	0.947874	0.289437			0.392456	0.417925	0.363813	0.340003	0.265103
14.385	0.434534	0.396302	0.681081	0.100908	0.645641	0.253969	0.359334	0.385704	0.101221	1.17222	0.266186	0.304841	0.239592	0.129221	0.263638	0.611661	0.531505	0.447482	0.501467	0.269052	0.785878	0.346135	0.165494	0.341116	0.458091	0.236444	0.530102	0.392199	0.199986	0.318781	0.0742957	0.341465	0.595145	0.17674	0.470347	0.276126	0.4972	0.575098	0.791613	0.113918	0.857657	0.278571			0.408	0.492499	0.413034	0.342547	0.1879
14.522	0.352356	0.391078	0.680334	0.0928301	0.423926	0.2499	0.52353	0.312144	0.116588	1.09425	0.263128	0.300806	0.232816	0.143486	0.225191	0.571909	0.559155	0.552868	0.461112	0.191211	0.998054	0.326937	0.159078	0.325191	0.521448	0.203849	0.493493	0.419268	0.190303	0.333618	0.149069	0.361316	0.601207	0.239753	0.498426	0.285265	0.503565	0.514761	0.788787	0.0976657	0.879904	0.346436			0.367974	0.457871	0.448386	0.307919	0.205933
14.659	0.309174	0.346044	0.609654	0.0281435	0.273813	0.287603	0.690803	0.273889	0.178521	1.01526	0.286184	0.288418	0.24429	0.178651	0.214318	0.506749	0.611164	0.666829	0.448424	0.139802	1.06608	0.31691	0.18509	0.329935	0.576664	0.190162	0.484901	0.452703	0.211401	0.36751	0.2086	0.369435	0.602116	0.398441	0.526487	0.309671	0.646271	0.564073	0.880516	0.171656	0.757209	0.305702			0.381504	0.453358	0.424322	0.30409	0.201968
14.796	0.29314	0.321531	0.525413	0.0601837	0.279827	0.306735	0.6956	0.197917	0.232679	0.995237	0.348507	0.324318	0.28255	0.228074	0.271686	0.485698	0.619035	0.713893	0.525458	0.0989655	1.02633	0.333179	0.236238	0.281676	0.601614	0.199329	0.547648	0.471757	0.259936	0.375692	0.218472	0.366443	0.576815	0.662584	0.555178	0.32606	0.68608	0.5475	0.820523	0.182717	0.674448	0.360582			0.320523	0.429157	0.460453	0.28592	0.215021
14.933	0.27552	0.286844	0.493202	0.0774965	0.347036	0.242409	0.70822	0.0786146	0.26438	0.973073	0.493144	0.339132	0.300892	0.275978	0.398356	0.469041	0.597039	0.711731	0.62865	0.0563087	0.847328	0.338379	0.348533	0.243994	0.595016	0.213889	0.647619	0.475053	0.330039	0.368059	0.210035	0.373387	0.5356	0.95663	0.597525	0.306179	0.649138	0.596493	0.922843	0.233297	0.514983	0.383401			0.40137	0.348764	0.440518	0.383336	0.208252
15.07	0.317815	0.291474	0.524016	0.0721787	0.518278	0.271535	0.792021	0.0567778	0.29936	0.93853	0.615817	0.313606	0.291532	0.310545	0.546512	0.489658	0.59145	0.61965	0.691114	0.0509562	0.650727	0.353416	0.517824	0.250363	0.564844	0.223723	0.728683	0.47801	0.406842	0.375038	0.219793	0.442589	0.512983	1.12398	0.643162	0.280027	0.695114	0.562192	0.981047	0.218716	0.411496	0.42322			0.457422	0.322627	0.397947	0.285587	0.272
15.207	0.334506	0.324447	0.522976	0.0265923	0.647829	0.22464	0.835987	0.101801	0.37922	0.81867	0.626703	0.308641	0.298965	0.310041	0.557025	0.477679	0.595131	0.513288	0.688741	0.0464611	0.507106	0.403538	0.578357	0.255924	0.503222	0.20534	0.845718	0.48668	0.44692	0.39115	0.244024	0.541626	0.518874	1.03486	0.69571	0.279769	0.659486	0.664502	0.936478	0.237504	0.295529	0.393996			0.549524	0.395664	0.36211	0.306423	0.200845
15.344	0.370952	0.318929	0.497407	0.0622074	0.647684	0.173141	0.805084	0.0468768	0.46148	0.690915	0.548739	0.319421	0.326561	0.269596	0.459731	0.48132	0.566854	0.427963	0.614655	0.0258983	0.455496	0.441937	0.514681	0.261886	0.465791	0.180767	1.09938	0.493735	0.452228	0.422288	0.288931	0.617007	0.523441	0.738848	0.731609	0.291763	0.824054	0.621517	0.877805	0.20348	0.30338	0.383663			0.617906	0.319537	0.295293	0.233711	0.218183
15.481	0.435602	0.272346	0.487213	0.0701858	0.802556	0.302173	0.889153	0.00257662	0.564575	0.611027	0.467074	0.334917	0.358272	0.227404	0.390587	0.49815	0.564686	0.403548	0.551184	0.0147713	0.510169	0.499623	0.440183	0.236673	0.472609	0.182667	1.45719	0.497768	0.441642	0.454096	0.405418	0.62742	0.53132	0.429745	0.729968	0.311512	0.595961	0.55371	0.74538	0.219529	0.398658	0.454451			0.66485	0.292552	0.257407	0.239247	0.220021
15.618	0.476606	0.232613	0.522375	0.0365465	0.961054	0.294759	0.963371	0.0191754	0.656098	0.543445	0.407147	0.349085	0.371528	0.198004	0.3957	0.509488	0.593622	0.4325	0.491626	0.0106744	0.579439	0.598358	0.353465	0.171338	0.465834	0.175154	1.79268	0.503532	0.420577	0.462964	0.522054	0.63004	0.566598	0.232199	0.703953	0.316906	0.492135	0.609229	0.806282	0.233702	0.335399	0.486826			0.714193	0.326492	0.27126	0.211591	0.302474
15.755	0.606361	0.295488	0.593026	0.0840881	1.01312	0.247575	0.947446	0.015257	0.691521	0.455389	0.35769	0.350376	0.379433	0.175184	0.408395	0.507065	0.619024	0.476403	0.493353	0.0273751	0.673471	0.712035	0.282806	0.164423	0.437566	0.144854	1.90157	0.525309	0.422881	0.460742	0.525612	0.622205	0.625832	0.155045	0.678592	0.314691	0.461034	0.527367	0.798536	0.221236	0.39121	0.510079			0.810738	0.266903	0.329738	0.274127	0.303425
15.892	0.73999	0.289882	0.654524	0.0621972	0.914848	0.246313	0.944688	0.0178742	0.604454	0.435238	0.309776	0.359532	0.412877	0.180415	0.394111	0.488367	0.640767	0.529093	0.433979	0.0161631	0.751864	0.835922	0.336095	0.18923	0.400627	0.13106	1.84237	0.572811	0.44411	0.444484	0.430355	0.573282	0.680923	0.148635	0.647061	0.313576	0.453911	0.537134	0.765645	0.225923	0.405999	0.62258			0.919522	0.257129	0.362182	0.250355	0.291004
16.029	0.892078	0.290951	0.729283	0.101408	0.935166	0.273802	1.02597	0.0539506	0.498273	0.40231	0.26345	0.386988	0.440812	0.205188	0.348278	0.498433	0.652523	0.543564	0.453707	0.0181571	0.757663	0.902787	0.331512	0.170253	0.38608	0.137606	1.62404	0.657014	0.447309	0.41985	0.300953	0.565093	0.714702	0.165908	0.600512	0.297874	0.278111	0.435249	0.749591	0.233858	0.429279	0.625054			0.917777	0.331939	0.445099	0.222926	0.351119
16.166	0.930055	0.310322	0.740426	0.0965179	0.83551	0.293535	0.985349	0.0963745	0.46287	0.341704	0.2136	0.399158	0.447211	0.20371	0.305876	0.515872	0.677248	0.569284	0.430233	0.0224309	0.683572	0.896448	0.360882	0.158323	0.446571	0.143523	1.3719	0.734658	0.497918	0.426535	0.190367	0.520067	0.703346	0.173309	0.590046	0.289204	0.174868	0.446243	0.755237	0.159317	0.419964	0.607423			0.825206	0.305527	0.567397	0.232034	0.258294
16.303	0.78124	0.27994	0.6739	0.0294995	0.582392	0.305622	0.847309	0.142813	0.431158	0.323298	0.16174	0.380399	0.455485	0.212751	0.308182	0.509262	0.724873	0.61914	0.387399	0.0502994	0.596641	0.877911	0.381788	0.113864	0.637105	0.152739	1.09432	0.79173	0.614045	0.442783	0.144115	0.493721	0.675195	0.16541	0.643802	0.293505	0.179656	0.449206	0.822329	0.210542	0.412348	0.600356			0.817332	0.335844	0.631172	0.141393	0.289548
16.44	0.781671	0.250819	0.553774	0.0616116	0.358161	0.318869	0.764742	0.149304	0.408532	0.307135	0.140551	0.415081	0.457817	0.226173	0.319484	0.481365	0.745078	0.626064	0.420336	0.103797	0.551549	0.85011	0.361058	0.123083	0.947788	0.164352	0.857193	0.837925	0.782488	0.454832	0.145257	0.495678	0.658205	0.151201	0.708204	0.293312	0.23753	0.432472	0.804007	0.32422	0.421978	0.548531			0.777007	0.305004	0.696693	0.17512	0.225702
16.577	0.75829	0.216538	0.424163	0.0136591	0.293191	0.272282	0.693418	0.170098	0.421208	0.276909	0.126494	0.447105	0.445952	0.221115	0.293392	0.42667	0.737625	0.618149	0.470386	0.170474	0.466639	0.853607	0.34504	0.157306	1.17524	0.16739	0.768301	0.861349	0.90196	0.444917	0.14385	0.456172	0.654135	0.158103	0.733637	0.279543	0.287739	0.476253	0.791115	0.261691	0.464623	0.508352			0.742278	0.318482	0.664095	0.211516	0.292925
16.714	0.640337	0.268222	0.437604	0.0804584	0.375536	0.192993	0.671616	0.205776	0.483809	0.207121	0.108489	0.406105	0.447232	0.198541	0.356925	0.441287	0.761734	0.594087	0.491945	0.262086	0.389943	0.820034	0.339062	0.193431	1.14437	0.168604	0.813603	0.864906	0.892275	0.403589	0.142341	0.475578	0.633184	0.197981	0.684901	0.266828	0.2642	0.557907	0.774316	0.253686	0.446719	0.476242			0.691697	0.271727	0.536174	0.178273	0.303606
16.851	0.501969	0.243686	0.456497	0.0816295	0.498681	0.174842	0.637667	0.213358	0.5957	0.159117	0.109735	0.369176	0.463244	0.162037	0.465711	0.397421	0.793315	0.573737	0.490815	0.319355	0.383034	0.713548	0.327235	0.182656	0.985674	0.14804	0.950309	0.837043	0.768616	0.372898	0.152778	0.490442	0.577988	0.243681	0.594075	0.250692	0.260591	0.56406	0.742593	0.197498	0.386522	0.466401			0.569688	0.314155	0.630489	0.225475	0.29591
16.988	0.480698	0.239068	0.447523	0.0277052	0.650093	0.178318	0.530643	0.136296	0.64866	0.155496	0.157875	0.398179	0.472523	0.141637	0.557892	0.343753	0.755505	0.611975	0.431441	0.360092	0.426304	0.647348	0.351456	0.158597	0.807864	0.143019	1.11784	0.778585	0.626442	0.361866	0.164221	0.464523	0.519686	0.271188	0.558458	0.230565	0.218941	0.527739			0.415628	0.465773			0.522006	0.315321	0.581082	0.179064	0.222114
17.125	0.551857	0.233874	0.475822	0.0207541	0.812359	0.16881	0.453687	0.171697	0.707092	0.142116	0.231111	0.404167	0.487377	0.141027	0.625269	0.310773	0.735475	0.642423	0.342171	0.377035	0.433277	0.663897	0.420675	0.136298	0.669791	0.130097	1.20893	0.716357	0.53048	0.360151	0.198728	0.410417	0.486664	0.284651	0.596691	0.234288	0.206113	0.575796							0.523067	0.28118	0.44682	0.170561	0.195821
17.262	0.689188	0.200551	0.538134	0.0484285	0.822977	0.153142	0.410998	0.263641	0.878973	0.0978407	0.285147	0.394667	0.53353	0.13127	0.706848	0.288851	0.739372	0.643874	0.245182	0.389278	0.430082	0.683849	0.526901	0.124301	0.587677	0.119675	1.16146	0.679188	0.487583	0.361383	0.212963	0.34743	0.466692	0.263208	0.648955	0.209202	0.220059	0.585733							0.52793	0.255385	0.318948	0.159151	0.223114
17.399	0.765555	0.171304	0.521382	0.0843072	0.68684	0.144727	0.444886	0.261743	0.942064	0.112849	0.29638	0.436602	0.611841	0.101927	0.826421	0.246726	0.737398	0.599071	0.184041	0.408357	0.36153	0.641199	0.624268	0.148835	0.50926	0.108782	0.97751	0.658137	0.492486	0.353522	0.219577	0.307816	0.439014	0.213582	0.691314	0.191743	0.247051	0.550447							0.583297	0.303296	0.283277	0.191033	0.185679
17.536	0.83271	0.127885	0.475514	0.00921452	0.561972	0.109746	0.499783	0.250799	0.958236	0.128828	0.238907	0.494339	0.714157	0.0639316	0.895156	0.194328	0.724902	0.538448	0.160397	0.410314	0.250491	0.587386	0.679825	0.177843	0.422397	0.0719208	0.769419	0.631499	0.529309	0.348878	0.205759	0.295443	0.431818	0.176643	0.734931	0.198966	0.371482	0.569494							0.560833	0.216928	0.198107	0.215379	0.189439
17.673	0.995698	0.0970241	0.34381	0	0.490345	0.0745463	0.472391	0.206683	0.978384	0.0883245	0.150809	0.529839	0.825794	0.038823	0.935237	0.159214	0.688916	0.467751	0.158008	0.420253	0.204941	0.642241	0.674458	0.186994	0.424765	0.0631559	0.611163	0.598367	0.553148	0.352062	0.160901	0.296425	0.43889	0.180425	0.758924	0.185828	0.448762	0.638538							0.556148	0.273149	0.229289	0.15711	0.205816
17.81	1.00622	0.0216858	0.219028	0.0671965	0.526344	0.058563	0.470394	0.285179	1.00841	0.0391973	0.0879378	0.556451	0.908746	0.0503502	1.0032	0.166335	0.683071	0.382082	0.167524	0.455801	0.21048	0.710522	0.660884	0.189773	0.480507	0.0532039	0.497313	0.569291	0.530933	0.355412	0.125426	0.275059	0.417737	0.23528	0.757657	0.16728	0.433258	0.755699							0.610365	0.333457	0.190861	0.0507682	0.142941
17.947	0.844972	0.0460921	0.178916	0.089536	0.585978	0.0576122	0.538486	0.228379	1.05413	0.0460481	0.0451856	0.598365	0.963276	0.103026	1.00488	0.177626	0.659877	0.343794	0.179629	0.46472	0.200444	0.677988	0.674284	0.196889	0.542561	0.0381962	0.410479	0.546455	0.482818	0.362711	0.114951	0.274133	0.37825	0.302014	0.767188	0.172954	0.309348	0.782445							0.54908	0.279526	0.223423	0.0512014	0.164151
18.084	0.655849	0.0297143	0.153966	0.0932581	0.548901	0.089879	0.472946	0.181156	0.986723	0.0633834	0.0174735	0.628359	1.00751	0.169223	0.897914	0.154792	0.624382	0.361972	0.208146	0.450265	0.139192	0.640537	0.724866	0.199531	0.569051	0.0296095	0.334262	0.547745	0.425556	0.376785	0.105986	0.291031	0.339823	0.33465	0.734936	0.203112	0.281061	0.741341							0.55513	0.202264	0.251883	0.104035	0.147083
18.221	0.587493	0	0.167025	0.0686107	0.572567	0.0908067	0.425265	0.209163	0.975758	0.0827178	0.0399162	0.6462	1.00706	0.214415	0.733909	0.134965	0.57286	0.35115	0.199203	0.432853	0.142383	0.639686	0.741363	0.194042	0.54313	0.0280356	0.294942	0.569281	0.387517	0.389803	0.0880524	0.304365	0.311077	0.351665	0.64966	0.22446	0.292833	0.725405							0.458679	0.245556	0.315206	0.126019	0.179513
18.358	0.580221	0.0138859	0.224188	0.0452268	0.56487	0.073734	0.445585	0.221844	1.00423	0.0944957	0.0944715	0.668994	1.00341	0.230969	0.669767	0.132561	0.535889	0.420757	0.145504	0.405363	0.114038	0.631647	0.711597	0.161713	0.515502	0.0216032	0.273565	0.594884	0.374534	0.397604	0.0908568	0.292774	0.303932	0.365488	0.52455	0.228762	0.159933	0.689633							0.401242	0.197631	0.386061	0.144512	0.151583
18.495	0.549449	0.0446655	0.19645	0.0284757	0.611861	0.119043	0.443672	0.195414	0.999344	0.0905435	0.105575	0.670938	0.969308	0.259985	0.762428	0.140277	0.509	0.492369	0.0875901	0.373904	0.14903	0.622378	0.731892	0.137855	0.53933	0.0136992	0.23933	0.618626	0.371904	0.415454	0.084054	0.324286	0.307497	0.375624	0.439688	0.234416	0.0792906	0.701852							0.317406	0.208174	0.483774	0.117667	0.147029
18.632	0.509035	0.0388708	0.200038	0.0522328	0.754899	0.0255532	0.490301	0.184356	1.02851	0.0915151	0.0776131	0.682414	0.891995	0.292857	0.915125	0.0984871	0.50655	0.482878	0.0588705	0.389349	0.132805	0.617272	0.767809	0.152904	0.547083	0.017454	0.202446	0.656443	0.386175	0.448745	0.0668884	0.316469	0.315737	0.37917	0.383763	0.233827	0.115867	0.670028							0.410642	0.289612	0.62081	0.112246	0.111589
18.769	0.389346	0.085737	0.180134	0.108492	0.851383	0	0.567298	0.167573	1.12429	0.0917285	0.0704211	0.694905	0.821268	0.279937	1.10177	0.0822315	0.51631	0.467204	0.0678671	0.421461	0.116839	0.61472	0.8077	0.169642	0.529373	0.0254376	0.168137	0.686361	0.408243	0.467523	0.032042	0.304863	0.33206	0.379496	0.359959	0.227095	0.132616	0.587686							0.508064	0.234983	0.513909	0.115465	0.195125
18.906	0.280273	0.119222	0.127659	0.114783	0.740254	0.0337566	0.547895	0.181156	1.15034	0.139057	0.0817045	0.69227	0.715349	0.226269	1.13457	0.05428	0.509685	0.412778	0.0820509	0.400044	0.110388	0.581147	0.831703	0.182045	0.503217	0.0185842	0.140974	0.73497	0.417487	0.451873	0.00968396	0.309777	0.347652	0.391256	0.366724	0.217177	0.163735	0.614628							0.606912	0.220928	0.470334	0.237162	0.231026
19.043	0.217796	0.0944327	0.0230718	0.0973843	0.653482	0.124286	0.536902	0.181086	1.05519	0.161556	0.116691	0.686855	0.570377	0.158789	1.09397	0.0294693	0.487938	0.340746	0.0908262	0.361855	0.0664027	0.602142	0.867273	0.179673	0.502541	0.0033717	0.135822	0.821471	0.412359	0.427616	0.0504785	0.293166	0.342215	0.414162	0.393316	0.192994									0.646592	0.172073	0.403437	0.211087	0.286852
19.18	0.216778	0.0598378	0.0956988	0.155	0.602943	0.136089	0.535748	0.163005	0.873607	0.189225	0.115716	0.671667	0.478755	0.128205	1.10283	0.00545574	0.455614	0.294085	0.0820882	0.369715	0.0188986	0.625027	0.974154	0.187875	0.520687	0.0077333	0.134888	0.888316	0.40899	0.418816	0.0560475	0.221454	0.312506	0.472113	0.458101	0.172096									0.748834	0.230124	0.353143	0.161533	0.239486
19.317	0.235753	0.0935959	0.118996	0.185225	0.623068	0.130784	0.572755	0.240831	0.637625	0.199565	0.123162	0.646859	0.42755	0.18329	1.06346	0	0.415383	0.268175	0.0640339	0.383343	0.072202	0.605355	1.01531	0.185708	0.517357	0.0397133	0.146058	0.96721	0.421857	0.414763	0.0568279	0.176891	0.293015	0.590522	0.553502	0.174061									0.834754	0.258456	0.297734	0.23555	0.248162
19.454	0.318449	0.130546	0.127554	0.107575	0.529728	0.154694	0.608341	0.264013	0.443663	0.215636	0.126379	0.655482	0.388279	0.276171	1.00631	0.00734341	0.394178	0.239973	0.0505804	0.365064	0.13489	0.609139	0.937844	0.17215	0.542353	0.0694024	0.15847	1.07201	0.455676	0.404702	0.079124	0.134324	0.299252	0.770969	0.65222	0.184104									0.836062	0.247652	0.278393	0.233333	0.203272
19.591	0.358276	0.117298			0.458764	0.181556	0.554154	0.254393	0.370563	0.261146	0.121128	0.664476	0.354191	0.289549	0.974518	0.022145	0.39305	0.213083	0.0536406	0.341112	0.13906	0.58266	0.81787	0.178386	0.559123	0.0675402	0.176584	1.15134	0.516636	0.396686	0.123954	0.0929874	0.316503	0.957563	0.700741	0.189959									0.666768	0.270587	0.193382	0.19196	0.22881
19.728	0.272179	0.114795			0.357221	0.123824	0.581679	0.261765	0.342504	0.28415	0.145898	0.644559	0.332899	0.251709	0.913776	0.0405243	0.421085	0.179875	0.0612696	0.320474	0.117686	0.562798	0.663066	0.185434	0.567818	0.0919803	0.193516	1.17479	0.605678	0.395216	0.139096	0.0578238	0.327559	1.00185	0.655602	0.179599									0.458732	0.245848	0.207877	0.255513	0.253177
19.865	0.220299	0.0964454			0.330675	0.0920886	0.718524	0.263619	0.370767	0.252985	0.188697	0.597524	0.310104	0.247705	0.816527	0.0555522	0.487938	0.138785	0.0626451	0.303529	0.0753939	0.570646	0.584814	0.198855	0.558196	0.148499	0.190543	1.11739	0.691132	0.393631	0.137248	0.0516651	0.34705	0.905456	0.567003	0.149383									0.289968	0.228053	0.225451	0.234426	0.211066
20.002	0.286678	0.0687547			0.45448	0.111221	0.874094	0.229563	0.426188	0.232374	0.206262	0.574153	0.298115	0.294804	0.701129	0.0741834	0.544762	0.160434	0.0687254	0.289679	0.0592984	0.556178	0.586256	0.204548	0.518968	0.198741	0.176177	1.04564	0.73764	0.391874	0.111845	0.0408242	0.381205	0.760525	0.507981	0.120763									0.214743	0.224114	0.218982	0.257387
20.139	0.257988	0.0437218			0.531648	0.132767	0.984	0.193674	0.437622	0.216299	0.198829	0.531554	0.268132	0.43515	0.624432	0.0788165	0.613988	0.177435	0.0791427	0.272434	0.0555196	0.51835	0.596555	0.159883	0.407225	0.257857	0.173566	0.9888	0.731575	0.402288	0.0807343	0.0354476	0.401178	0.687949	0.494168	0.115585									0.191679	0.214711	0.197679	0.233222
20.276	0.204929	0.0716742			0.503132	0.188827	0.971327	0.214354	0.467146	0.170796	0.214889	0.47739	0.234455	0.55821	0.692996	0.0832678	0.655559	0.176479	0.0864465	0.264918	0.0413135	0.520999	0.572465	0.129588	0.291163	0.291309	0.172718	0.905833	0.674104	0.427503	0.0835015	0.0153266	0.385803	0.704115	0.479978	0.113098									0.182638	0.299411	0.213581	0.239504
20.413	0.137605	0.0948935			0.409551	0.200715	1.02336	0.178605	0.587767	0.155187	0.2303	0.441696	0.214794	0.647845	0.878632	0.0851491			0.0893467	0.2201	0.0523922	0.497259	0.5609	0.106679	0.277401	0.307014	0.169545	0.777139	0.593496	0.463833	0.0694673	0	0.326669	0.740499	0.471468	0.105708									0.157773	0.286758	0.203729	0.276595
20.55	0.0833549	0.14406			0.343464	0.190591	1.03233	0.178653	0.785889	0.149019	0.217184	0.424567	0.202657	0.742542	0.998779	0.0999826			0.0739554	0.165326	0.0720708	0.450069	0.559634	0.0711647	0.260258	0.341262	0.159341	0.677694	0.545943	0.504764	0.0441265	0.00352477	0.266064	0.725218	0.473669	0.0972454									0.159691	0.268632	0.158037	0.252763
20.687	0.0871128	0.149829			0.342743	0.212217	0.899797	0.159481	0.944685	0.123661	0.244543	0.408293	0.184261	0.742854	0.953464	0.127988			0.0789161	0.136103	0.11723	0.394553	0.58534	0.034903	0.291558	0.313902			0.552956	0.540443	0.0372222	0.0282017	0.231657	0.706545	0.479507	0.0896481									0.204611	0.293371	0.203998	0.325893
20.824	0.155817	0.175426			0.337102	0.244176	0.684061	0.149396	1.03434	0.0944596	0.293342	0.407399	0.159218	0.65142	0.812168	0.141639			0.116904	0.118028	0.205527	0.353983	0.66586	0.0466309	0.351728	0.315108			0.583832	0.573256	0.0409704	0.0287173	0.218845	0.814625	0.474594	0.0854148									0.215256	0.25035	0.19305	0.319258
20.961	0.194027	0.196474			0.379207	0.266257	0.52881	0.143391	0.94231	0.0813194	0.380902	0.395876	0.136169	0.690117	0.684298	0.13383			0.164488	0.094627			0.722859	0.0843122	0.428544	0.296512			0.604277	0.612684	0.0816906	0.0297659	0.197808	0.873022	0.476152	0.0875655									0.226854	0.272682	0.16737	0.326553
21.098	0.243768	0.257314			0.411504	0.215154	0.500482	0.0958879	0.725577	0.0670993	0.484472	0.344811	0.116614	1.05083	0.618906	0.156485			0.190865	0.0638968			0.801241	0.0607272	0.48143	0.284493			0.609649	0.64174	0.149545	0.0180342	0.168228	0.774571	0.484993	0.0995435									0.228986	0.297848	0.167706	0.408312
21.235	0.232452	0.314701			0.353959	0.20284	0.537159	0.0590264	0.551457	0.0768026	0.594849	0.336762	0.115295	1.55126	0.635631	0.156208			0.194733	0.0445896			0.802856	0.0339541	0.443701	0.303658			0.591931	0.647758	0.146453	0.0293766	0.141312	0.566568	0.506638	0.107712											0.185573	0.267261
21.372	0.19885	0.312799			0.262418	0.273255	0.506853	0.037396	0.466189	0.0745573	0.683218	0.345438	0.113737	1.74626	0.639112	0.161867							0.773572	0.0314491	0.435452	0.263148			0.541471	0.641483	0.151193	0.0237475	0.129044	0.405639	0.540771	0.113075											0.254379	0.206211
21.509	0.147101	0.388587			0.239062	0.226268	0.385677	0.00336177	0.40681	0.0768256	0.756788	0.312118	0.0955307	1.45708	0.612371	0.184567							0.726176	0.0584917	0.419972	0.32825			0.476805	0.630682	0.21842	0.0468742	0.116756	0.357023	0.539224	0.119463											0.215673	0.342642
21.646	0.152459	0.45245			0.303934	0.238529	0.330449	0	0.340689	0.0555971	0.798271	0.2825	0.0630639	0.949776	0.568945	0.193862							0.762574	0.0746907	0.536377	0.325477			0.414948	0.617196	0.27261	0.0842438	0.110395	0.387245	0.469519	0.12898											0.261901	0.350184
21.783	0.141365	0.496102			0.35765	0.182811	0.456425	0.0590264	0.273233	0.00982805	0.745879	0.259824	0.0348022	0.558031	0.525271	0.213332							0.881761	0.0645227	0.658576	0.30241			0.371065	0.613932	0.329916	0.0879124	0.114151	0.402331	0.374993	0.133244											0.181012	0.358098
21.92	0.242821	0.640766			0.462204	0.13003	0.699759	0.044444	0.273389	0.00696892	0.647183	0.220933	0.020024	0.382958	0.487732	0.248305							1.03211	0.0596417	0.74069	0.314372			0.360778	0.621163	0.436643	0.0731715	0.0998944	0.391537	0.314072	0.111431											0.225802	0.380081
22.057	0.307017	0.70882			0.515306	0.161804	0.948197	0.0699927	0.306642	0.0254532	0.538677	0.160796	0.0214489	0.340407	0.45389	0.271107							1.0047	0.0958352	0.792932	0.313568			0.387446	0.617034	0.551366	0.0710531	0.0788305	0.371974	0.273952	0.0945391											0.201728	0.25034
22.194	0.286323	0.674911			0.597587	0.18775	0.966676	0.051584	0.312111	0.0278691	0.534616	0.10782	0.030812	0.390515	0.422854	0.277755							0.893852	0.107491	0.819955	0.343443			0.451607	0.595145	0.634516	0.0979712	0.0771412	0.361204	0.246504	0.0783088											0.213668	0.283094
22.331	0.285766	0.65178			0.531295	0.185047	0.850686	0.0590264	0.367793	0.0152378	0.642122	0.0733581	0.0206714	0.490261	0.413874	0.273571							0.751923	0.125588	0.794697	0.3473			0.536018	0.565702	0.701969	0.136712	0.0727373	0.353807	0.212509	0.0599393											0.162863	0.284424
22.468	0.287478	0.572107			0.560829	0.118543	0.699214	0.0553402	0.42353	0	0.786211	0.054576	0.0114475	0.578928	0.435675	0.243783							0.69903	0.145855	0.721257	0.39067			0.613452	0.528612	0.746574	0.190653	0.0425007	0.340552	0.191214	0.0550331											0.12126	0.260601
22.605	0.251355	0.536498			0.571721	0.14306	0.765392	0.0378826	0.514164	0.00331541	0.875796	0.0235704	0.0124367	0.609724	0.498894	0.229431							0.665293	0.198787	0.653577	0.430853			0.637756	0.479849	0.727461	0.231495	0.0342483	0.343374	0.19098	0.0718228											0.141757	0.282011
22.742	0.215353	0.510028			0.543355	0.148496	0.888968	0.0425419	0.639821	0.0253908	0.839221	0.00517054	0.00826795	0.607683	0.661812	0.235815							0.561816	0.22244	0.609982	0.458381			0.577692	0.444217	0.678177	0.255885	0.0369745	0.323039	0.197969	0.0715658											0.0551495	0.191053
22.879	0.198912	0.501863			0.490463	0.139018	0.987469	0.0680464	0.744971	0.0437568	0.688579	0	0.0208438	0.653001	0.835399	0.256879							0.502155	0.264528	0.58595	0.479115			0.468988	0.436415	0.649065	0.28382	0.0341939	0.319784	0.228321	0.0529354											0.106108	0.244406
23.016					0.508196	0.142956	1.17957	0.102427	0.770056	0.05455	0.533414	0.0109793	0.0348083	0.755336	0.893058	0.280258							0.524457	0.311227	0.544886	0.458218			0.357492	0.431748	0.607793	0.307143	0.0402288	0.311409	0.309017	0.0533587											0.182493	0.250703
23.153					0.455962	0.0876193	1.32807	0.0825109	0.703501	0.111618	0.411136	0.0401084	0.0343031	0.805631	0.762841	0.311172									0.49479	0.432803			0.296185	0.384207	0.571212	0.322683	0.0280813	0.311577	0.411481	0.0577168											0.182101	0.215395
23.29					0.410149	0.0212687	1.39162	0.0625725	0.721078	0.104977	0.328431	0.0356526	0.0290815	0.778019	0.614864	0.320607									0.442653	0.440441			0.31451	0.3189	0.522418	0.319495	0.0323959	0.334851	0.51852	0.0509926
23.427					0.472498	0.0057743	1.39086	0.0783603	0.782888	0.086437	0.311607	0.0173175	0.0126666	0.657132	0.506763	0.344853									0.39371	0.422521			0.426378	0.301698	0.485622	0.326191	0.0429434	0.381346	0.636312	0.0371738
23.564					0.550448	0.0237285	1.15381	0.0934772	0.836125	0.0780369	0.357357	0.0287321	0.00474659	0.512029	0.461439	0.375993													0.603101	0.287703	0.443948	0.32934	0.0412385	0.439304	0.77742	0.0291343
23.701					0.570237	0.0263	0.837108	0.0687873	0.8846	0.0708283	0.453059	0.0395437	0.000668576	0.423564	0.44126	0.37319													0.766169	0.272991	0.37809	0.36477	0.0272309	0.470572	0.949845	0.0313039
23.838					0.563242	0.046537	0.674879	0.0437252	1.05524	0.070546	0.579095	0.0333732	0	0.391746	0.381981	0.366386													0.851879	0.264242	0.30982	0.356065	0.0105164	0.462456	1.00012	0.0381792
23.975					0.5613	0.0252799	0.752359	0.0781981	1.206	0.0732738	0.70638	0.0461819	0.00417482	0.339951	0.385392	0.361192													0.795905	0.252552	0.351481	0.348479	0	0.449454	0.902395	0.0409271
24.112					0.503865	0.0219655	0.900096	0.111421	1.21867	0.0556464	0.832378	0.0617877	0.0215759	0.270516	0.499304	0.359406													0.613006	0.244565	0.481034	0.341573	0.00318056	0.458513	0.721318	0.0457236
24.249					0.502762	0.063244	0.816346	0.145824	0.968298	0.0566541	0.899917	0.0543877	0.0478682	0.220751	0.714281	0.332382													0.390945	0.249527	0.585559	0.328576	0.0106912	0.511758	0.539927	0.0491443
24.386					0.570395	0.0620276	0.715447	0.185122	0.790583	0.0673455	0.858871	0.0374144	0.0382661	0.199286	0.978505	0.299817													0.234335	0.265358	0.631712	0.303365	0.0110756	0.578313	0.395451	0.0626871
24.523					0.645326	0.075959	0.741572	0.183847	0.681716	0.067677	0.709745	0.022191	0.0422292	0.24349	1.16857	0.287496													0.201114	0.301344	0.57418	0.285636	0.0130407	0.595743	0.324703	0.0892437
24.66					0.580944	0.0729256	0.797632	0.201397	0.571902	0.0854292	0.551541	0.0159969	0.0715497	0.320201	1.13885	0.263058													0.232839	0.351042	0.414698	0.261352	0.0311182	0.561124	0.269509	0.112247
24.797					0.414136	0.0340799	0.873487	0.234038	0.522999	0.122339	0.432731	0.0153763	0.100973	0.368599	0.931517	0.229061													0.2561	0.394536	0.241636	0.258182	0.0566792	0.498299	0.219868	0.133108
24.934					0.411718	0.0533007	0.956001	0.242221	0.566381	0.138627	0.374118	0.0189116	0.137878	0.431723	0.745255	0.203495													0.258445	0.455615	0.134406	0.270005	0.0920615	0.441605	0.188222	0.15077
25.071					0.33864	0.0613385	1.08869	0.257802	0.638147	0.162534	0.330008	0.0148087	0.215932	0.479071	0.649373	0.201317													0.237363	0.501418	0.0932969	0.260353	0.149956	0.408002	0.185818	0.16194
25.208					0.33768	0.0714666	1.12093	0.227638	0.614606	0.192307	0.277978	0.0191498	0.274915	0.460587	0.576379	0.172259													0.214915	0.533481	0.103848	0.277072	0.208888	0.37759	0.24588	0.174995
25.345					0.486025	0.070358	1.04127	0.19917	0.682644	0.206218	0.230197	0.0405114	0.329841	0.386095															0.213561	0.560354	0.110336	0.291848	0.253346	0.347233
25.482					0.568721	0.0376947	0.952409	0.197847	0.804458	0.197047	0.246378	0.0692964	0.377503	0.328015															0.221544	0.574725	0.108827	0.327152	0.280064	0.321433
25.619					0.542772	0.0657693	0.765731	0.220152	0.81843	0.216076	0.329017	0.101026	0.421911	0.344381																	0.115303	0.347164	0.293493	0.325323
25.756					0.404983	0.0404086	0.549933	0.246324	0.772453	0.271529	0.413137	0.120417	0.444685	0.40636																	0.0846584	0.371679	0.296852	0.370283
25.893					0.393821	0.063398	0.410473	0.206473	0.738782	0.297632	0.485909	0.118643	0.459079	0.416365																	0.0816385	0.342853	0.300231	0.441054
26.03					0.479778	0.0638407	0.41911	0.177075	0.755461	0.318696	0.589225	0.133734	0.462294	0.348504																	0.114662	0.304898	0.320588	0.508291
26.167					0.54106	0.0735415	0.553907	0.192399			0.708797	0.141802	0.442286	0.333092																	0.150023	0.300767	0.355768	0.556542
26.304					0.45206	0.0800665	0.674138	0.17253			0.758929	0.156666	0.422921	0.410184																	0.167278	0.309742	0.38978	0.586723
26.441					0.33182	0.0671937	0.63844	0.137733			0.671113	0.189772	0.452121	0.472722																	0.179526	0.302762	0.407539	0.626777
26.578					0.251385	0.0868378	0.617583	0.129804			0.542466	0.226016	0.488118	0.398719																	0.201683	0.26306	0.426381	0.620803
26.715					0.265419	0.139338	0.680869	0.125377			0.478508	0.262712	0.489706	0.327378																	0.2043	0.256775	0.43583	0.503437
26.852					0.337597	0.130426	0.590253	0.0663987			0.456593	0.286718	0.468054	0.316568																	0.189272	0.26541	0.414719	0.387461
26.989					0.334079	0.129906	0.479915	0.0605561			0.42519	0.295312	0.475714	0.273605																	0.216032	0.270075	0.407834	0.301463
27.126					0.316969	0.140778	0.389413	0.0332933			0.391765	0.291344	0.543528	0.208755																			0.420214	0.235244
27.263							0.320105	0.048919			0.379278	0.290488	0.522312	0.114792																			0.442595	0.197167
27.4							0.27787	0.091483			0.374511	0.312203	0.497786	0.0441377																			0.467336	0.191817
27.537							0.291612	0.0662586			0.340297	0.342579	0.509884	0.0165907																			0.49562	0.202488
27.674							0.372675	0.0630148			0.298394	0.37702	0.522009	0.0263204																			0.534528	0.20388
27.811							0.498928	0.126004			0.261305	0.407749	0.544786	0.0537807																			0.583169	0.197788
27.948							0.518526	0.189502			0.215285	0.387296	0.544904	0.124675																			0.621894	0.188232
28.085							0.46117	0.274077			0.20392	0.310559	0.525186	0.23899																			0.632939	0.181047
28.222							0.486267	0.382667			0.219587	0.327647	0.532531	0.311992																			0.593623	0.208067
28.359							0.496138	0.401909			0.279771	0.343959	0.521498	0.288032																			0.531208	0.277185
28.496							0.486421	0.390802			0.345962	0.358182	0.52884	0.245335																			0.49454	0.378353
28.633							0.499793	0.390272			0.356823	0.382908	0.556349	0.23652																			0.439348	0.443247
28.77							0.421466	0.330272			0.350403	0.420793	0.598015	0.312522																			0.395422	0.481086
28.907							0.48218	0.437425			0.312191	0.423437	0.523546	0.322438																			0.359496	0.475891
29.044							0.428056	0.388322			0.289168	0.382773	0.464285	0.27676																			0.350495	0.444246
29.181											0.290756	0.357858	0.423021	0.215512																			0.36496	0.396872
29.318											0.330805	0.397729	0.367735	0.172581																			0.386024	0.326961
29.455											0.378445	0.414058	0.353374	0.109538																			0.385958	0.239727
29.592											0.382152	0.395714
29.729											0.318335	0.362417
29.866											0.235968	0.336191
30.003
[truncated: 37 more columns]
