# Supplementary material for: Progenitors oppositely polarize WNT activators and inhibitors to orchestrate tissue development
Source: eLife. 2020 Apr 20;9:e54304. doi: 10.7554/eLife.54304 (PMC7224699; doi:10.7554/eLife.54304)
Supplement: Figure 5—figure supplement 3—source data 1. [file elife-54304-fig5-figsupp3-data1.xlsx]

## Sheet: DKK4_MYCtag
Figure 5 - figure supplement 3. DKK4-MYC Pixel intensity profile (Normalized Pixel Intensity measured from basal to apical side of progenitor cells )
	Cell 1		Cell 2		Cell 3		Cell 4		Cell 5		Cell 6		Cell 7		Cell 8		Cell 9		Cell 10		Cell 11		Cell 12		Cell 13		Cell 14		Cell 15		Cell 16		Cell 17		Cell 18		Cell 19		Cell 20		Cell 21		Cell 22		Cell 23		Cell 24		Cell 25
	Normalized Pixel Intensity	Normalized Pixel Intensity	Normalized Pixel Intensity	Normalized Pixel Intensity	Normalized Pixel Intensity	Normalized Pixel Intensity	Normalized Pixel Intensity	Normalized Pixel Intensity	Normalized Pixel Intensity	Normalized Pixel Intensity	Normalized Pixel Intensity	Normalized Pixel Intensity	Normalized Pixel Intensity	Normalized Pixel Intensity	Normalized Pixel Intensity	Normalized Pixel Intensity	Normalized Pixel Intensity	Normalized Pixel Intensity	Normalized Pixel Intensity	Normalized Pixel Intensity	Normalized Pixel Intensity	Normalized Pixel Intensity	Normalized Pixel Intensity	Normalized Pixel Intensity	Normalized Pixel Intensity	Normalized Pixel Intensity	Normalized Pixel Intensity	Normalized Pixel Intensity	Normalized Pixel Intensity	Normalized Pixel Intensity	Normalized Pixel Intensity	Normalized Pixel Intensity	Normalized Pixel Intensity	Normalized Pixel Intensity	Normalized Pixel Intensity	Normalized Pixel Intensity	Normalized Pixel Intensity	Normalized Pixel Intensity	Normalized Pixel Intensity	Normalized Pixel Intensity	Normalized Pixel Intensity	Normalized Pixel Intensity	Normalized Pixel Intensity	Normalized Pixel Intensity	Normalized Pixel Intensity	Normalized Pixel Intensity	Normalized Pixel Intensity	Normalized Pixel Intensity	Normalized Pixel Intensity
(basal to apical distance um)	MYC - Tag	DAPI	MYC - Tag	DAPI	MYC - Tag	DAPI	MYC - Tag	DAPI	MYC - Tag	DAPI	MYC - Tag	DAPI	MYC - Tag	DAPI	MYC - Tag	DAPI	MYC - Tag	DAPI	MYC - Tag	DAPI	MYC - Tag	DAPI	MYC - Tag	DAPI	MYC - Tag	DAPI	MYC - Tag	DAPI	MYC - Tag	DAPI	MYC - Tag	DAPI	MYC - Tag	DAPI	MYC - Tag	DAPI	MYC - Tag	DAPI	MYC - Tag	DAPI	MYC - Tag	DAPI	MYC - Tag	DAPI	MYC - Tag	DAPI	MYC - Tag	DAPI	MYC - Tag
0	0.193143	0.464509	0.0860865	0.404436	0.0815593	0.328353	0.206989	0	0.176895	0.212021	0.320045	0.312961	0.109165	0.395669	0.11682	0.330223	0.0718751	0.484078	0.162697	0.834197	0.0445186	0.569882	0.0453275	0.416394	0.0403373	0.464385	0.0717787	0.269439	0.0618555	0.111208	0.204829	0.0783528	0.0463417	0.0705838	0.00673146	0.0627015	0.0645609	0	0.152508	0.0806571	0.139842	0.133409	0.157832	0	0.0500566	0	0.024356	0.0195654	0.0122055
0.137	0.120005	0.491122	0.0550273	0.425716	0.0825533	0.380724	0.139568	0.0250121	0.262544	0.24363	0.218636	0.244509	0.161471	0.35637	0.149629	0.43116	0.153022	0.569918	0.155493	0.707227	0.0270079	0.570776	0.0414595	0.410838	0.0431831	0.440359	0.0807809	0.217263	0.133057	0.088997	0.141519	0.0223052	0.0681075	0.0918669	0.0378929	0.0147315	0.0825812	0.0611255	0.131548	0	0.096744	0.0916129	0.160276	0.0444512	0.0325648	0.0059529	0.0575378	0.0398313	0.0296685
0.274	0.0943374	0.5146	0.0679197	0.478765	0.119184	0.337443	0.174227	0.0747652	0.327117	0.218895	0.356502	0.192388	0.128356	0.542251	0.140489	0.526959	0.0944972	0.507849	0.254184	0.548825	0.00341384	0.525232	0.0555462	0.468645	0.032491	0.448482	0.101664	0.167196	0.0732261	0.0973268	0.180375	0	0.0713572	0.0684346	0.0257815	0.0222199	0.0711757	0.0168059	0.165063	0.0766524	0.124497	0.147595	0.234365	0.0963469	0.0589682	0.0423049	0.0293827	0.0180934	0.00201974
0.411	0.0766289	0.53853	0.0924483	0.498653	0.116851	0.344991	0.194074	0.0823002	0.2901	0.245765	0.243877	0.247167	0.22218	0.526541	0.0627549	0.459668	0.0817865	0.530875	0.291716	0.408247	0.00400677	0.544652	0.0586135	0.488576	0.0201098	0.416057	0.137123	0.12811	0.0697086	0.120529	0.16236	0.0445214	0.0604096	0.0678851	0.0741264	0	0.100664	0.00634172	0.104049	0.0726846	0.111318	0.146018	0.243366	0.0773764	0.0920199	0.0716703	0.0546595	0.0121053	0.0412843
0.548	0.0626144	0.540307	0.102957	0.514527	0.158409	0.318188	0.236472	0.0833939	0.382	0.13733	0.331132	0.24354	0.204312	0.496077	0.0405385	0.564539	0.120792	0.53473	0.263064	0.265703	0.022705	0.527589	0.0615163	0.486443	0.0254931	0.434855	0.124612	0.0805711	0.0467609	0.107741	0.185237	0.0459857	0.0817457	0	0.134419	0.0356632	0.0730682	0.01593	0.11941	0.0726416	0.0993663	0.149329	0.327132	0.048065	0.082765	0.0589174	0.0414959	0.0187189	0.134552
0.685	0.0670828	0.508007	0.0897131	0.499298	0.153355	0.277347	0.327006	0.135162	0.298551	0.107983	0.37997	0.211089	0.0746795	0.481279	0.100833	0.514114	0.146929	0.402484	0.209446	0.184252	0.0206268	0.527346	0.0541159	0.472252	0.00342149	0.498234	0.106257	0.0337034	0.0771963	0.0962668	0.197208	0.0316102	0.0936245	0.0409081	0.0458926	0.0346381	0.105922	0.0231311	0.144866	0.0552861	0.115372	0.165387	0.245894	0.017311	0.0955982	0.0338988	0.0386382	0.0257077	0.169806
0.822	0.0603422	0.513099	0.0899225	0.479075	0.130591	0.335702	0.161222	0.180427	0.322855	0.100054	0.39854	0.136257	0.108944	0.463714	0.133536	0.45852	0.189064	0.32998	0.207603	0.104651	0.0378406	0.534414	0.076678	0.461148	0.0132584	0.523717	0.09979	0.0282518	0.0862325	0.127845	0.188806	0.0304774	0.066763	0.0182149	0.071257	0.0277336	0.103598	0.019901	0.147183	0.0753829	0.156987	0.173853	0.171929	0.0727105	0.112502	0.010012	0.0143162	0.00775192	0.216494
0.959	0.0430272	0.532068	0.103646	0.492528	0.18756	0.241503	0.241989	0.17602	0.400774	0.130136	0.49719	0.0643793	0.137327	0.448702	0.114176	0.353893	0.214808	0.300254	0.218996	0.063425	0.0550544	0.581746	0.0850538	0.453398	0.0317586	0.463857	0.0828859	0.0110061	0.0656748	0.111795	0.226732	0.0558843	0.135521	0.0865765	0.0980074	0.0737156	0.0696965	0.00945989	0.235662	0.0635898	0.183347	0.15603	0.185435	0.0693756	0.114974	0.0224117	0.0152029	0.00200574	0.236302
1.096	0.0193397	0.569766	0.153047	0.51164	0.195928	0.261007	0.211988	0.232663	0.415369	0.121446	0.514523	0.109643	0.0948868	0.350163	0.0806146	0.252775	0.242706	0.257775	0.187496	0.0462435	0.052977	0.634235	0.061593	0.451986	0	0.535386	0.0833165	0.000483588	0.0578536	0.115199	0.242852	0.0501559	0.183875	0.163321	0.0657443	0.101128	0.119118	0.0326832	0.235582	0.0800806	0.217865	0.149277	0.225597	0.113385	0.123839	0.0214861	0.0358076	0.0313913	0.23932
1.233	0.0286319	0.672935	0.160105	0.493267	0.205495	0.157439	0.385593	0.215265	0.38203	0.135461	0.531344	0.123713	0.136732	0.308504	0.0840585	0.197414	0.274682	0.168377	0.217321	0.0222386	0.0276017	0.68177	0.0647776	0.42823	0.0407556	0.60942	0.12084	0.00574037	0.0903297	0.123066	0.173401	0.113129	0.214549	0.134112	0.100028	0.119591	0.114247	0.0569569	0.228884	0.0979635	0.247364	0.227725	0.12559	0.0489335	0.140041	0.049033	0.0597271	0.0185395	0.158817
1.37	0.0620115	0.576771	0.165089	0.420056	0.257382	0.124637	0.264732	0.457056	0.332966	0.0815934	0.427527	0.171892	0.238317	0.22278	0.108367	0.260676	0.410991	0.161704	0.232066	0.0377737	0.033092	0.693146	0.0625744	0.416819	0.0882906	0.657721	0.117747	0.00710158	0.100406	0.103877	0.20752	0.0864903	0.31961	0.152944	0.1088	0.142319	0.0556981	0.0715468	0.285509	0.0643686	0.17967	0.1583	0.149468	0.085642	0.11714	0.0466289	0.112654	0.055652	0.100251
1.507	0.0683649	0.596042	0.205684	0.393218	0.252954	0.130368	0.222808	0.248125	0.336922	0.166273	0.511997	0.123472	0.293778	0.129565	0.151342	0.175097	0.476609	0.254637	0.296742	0	0.0276017	0.636715	0.0535599	0.378562	0.0420671	0.641673	0.0928131	0.0127188	0.0931247	0.0869024	0.260763	0.113861	0.299058	0.182163	0.14179	0.121565	0.0859954	0.0577142	0.329882	0.0923766	0.182205	0.172203	0.185633	0.110466	0.0702105	0.0338498	0.0729726	0.0339642	0.0975029
1.644	0.0511388	0.602626	0.184133	0.295941	0.206736	0.0756589	0.139109	0.252355	0.37733	0.248259	0.512084	0.0733578	0.408023	0.163656	0.117104	0.18037	0.299242	0.248603	0.261723	0.0489737	0.0347245	0.54904	0.0667539	0.346539	0.0780533	0.560246	0.173076	0.0161666	0.116517	0.0705275	0.261885	0.0823696	0.231942	0.230871	0.133164	0.133123	0.155758	0.087974	0.21327	0.0255733	0.112202	0.173894	0.185838	0.00785396	0.103824	0.0539883	0.069194	0	0.190749
1.781	0.0246776	0.615261	0.162502	0.198118	0.214765	0.105894	0.17139	0.337946	0.336501	0.399903	0.599542	0.0533722	0.499554	0.193182	0.10966	0.147566	0.250021	0.286967	0.162865	0.0883131	0.069894	0.475707	0.104963	0.344334	0.113045	0.519491	0.222233	0	0.0921481	0.0615902	0.277655	0.120416	0.165978	0.270339	0.144575	0.157799	0.127728	0.0746946	0.216415	0.0757632	0.164372	0.187815	0.134529	0.11317	0.180326	0.0566867	0.0819279	0.0310077	0.17699
1.918	0.0294824	0.597675	0.110662	0.195908	0.181293	0.124526	0.156423	0.403816	0.31245	0.467377	0.607038	0.0685356	0.402141	0.190223	0.130293	0.132674	0.228754	0.319973	0.105225	0.115129	0.107735	0.469125	0.13309	0.343253	0.0591686	0.547079	0.146882	0.0193323	0.0946175	0.0494933	0.284681	0.138086	0.114275	0.31328	0.106037	0.229914	0.145937	0.08074	0.205399	0.111302	0.102335	0.218674	0.22053	0.0874342	0.185687	0.0555223	0.132911	0.0583416	0.158128
2.055	0.0256805	0.582212	0.154283	0.14384	0.160503	0.146907	0.0966889	0.357545	0.409917	0.480323	0.486602	0.0530625	0.276051	0.139312	0.158182	0.172562	0.213624	0.395303	0.0799246	0.138892	0.105063	0.43764	0.149394	0.339767	0.0582102	0.565758	0.140727	0.0927683	0.147278	0.0402205	0.185981	0.21539	0.0962255	0.424276	0.10972	0.233471	0.107655	0.0838055	0.228229	0.15214	0.0967425	0.263709	0.300795	0.0947828	0.166282	0.073224	0.138395	0.035432	0.188862
2.192	0.035252	0.618225	0.145044	0.071777	0.192255	0.146769	0.107753	0.348234	0.580145	0.559759	0.468296	0	0.206077	0.206211	0.139795	0.156976	0.208114	0.53078	0.0718818	0.231902	0.0983854	0.40851	0.108623	0.308585	0.0698581	0.54727	0.10054	0.137784	0.155107	0.0409169	0.262012	0.305086	0.0701007	0.42025	0.0770924	0.308622	0.13115	0.0420378	0.173503	0.145473	0.109271	0.358385	0.307535	0.0616176	0.212668	0.0941736	0.138054	0.0246193	0.239248
2.329	0.0540966	0.627344	0.108704	0.0432108	0.24257	0.157236	0.154268	0.332075	0.612732	0.537379	0.444601	0.0842162	0.215616	0.268156	0.170464	0.0799572	0.104193	0.568085	0.0891398	0.338559	0.110406	0.385109	0.112285	0.270908	0.103313	0.519257	0.0773602	0.161885	0.154019	0.0253631	0.199713	0.326377	0.0694292	0.444217	0.100876	0.324874	0.11376	0.0670951	0.197664	0.202274	0.118287	0.341252	0.318377	0.0434664	0.188905	0.1444	0.182128	0.04672	0.261197
2.466	0.0603549	0.606181	0.134482	0.0649039	0.256465	0.203444	0.0608749	0.337409	0.49036	0.626613	0.342976	0.0769535	0.18599	0.317285	0.17306	0.145325	0.227829	0.667084	0.102712	0.481627	0.0828041	0.424112	0.109261	0.273824	0.100146	0.47587	0.0725282	0.223561	0.105694	0.00284184	0.213201	0.195429	0.0832039	0.392441	0.0986566	0.331863	0.153479	0.0910922	0.130548	0.220335	0.110447	0.360413	0.434884	0.140982	0.167246	0.176533	0.2078	0.046991	0.153535
2.603	0.0491204	0.564622	0.100809	0.0839386	0.179841	0.269699	0.167021	0.435279	0.481373	0.63785	0.361639	0.06673	0.177167	0.439918	0.209539	0.0828883	0.181743	0.630511	0.027144	0.458667	0.069894	0.423989	0.0870697	0.275643	0.106771	0.442503	0.0576972	0.261158	0.0744966	0.015564	0.273335	0.184749	0.0782349	0.370331	0.139442	0.328591	0.14704	0.0943915	0.133973	0.284293	0.125034	0.407557	0.302325	0.148366	0.218085	0.167447	0.244808	0.0477333	0.0965343
2.74	0.0323513	0.535058	0.147449	0.043954	0.123886	0.34946	0.0521658	0.412216	0.268345	0.615706	0.201389	0.153185	0.214901	0.522179	0.200298	0.162047	0.234707	0.612298	0.0157498	0.489977	0.0977917	0.355653	0.119793	0.29547	0.100384	0.41823	0.0225335	0.2564	0.036359	0.0147633	0.313083	0.251071	0.0603638	0.411342	0.0521031	0.304054	0.157568	0.10804	0.135354	0.27943	0.14467	0.42112	0.175279	0.112472	0.199922	0.220653	0.204915	0.0559689	0.143632
2.877	0.0352774	0.558121	0.177333	0.0369217	0.126354	0.44367	0.0467744	0.353068	0.181944	0.675612	0.233886	0.194042	0.210629	0.57904	0.206599	0.144104	0.121837	0.594669	0.0184313	0.512457	0.0805787	0.263592	0.105293	0.343765	0.0941523	0.377207	0.0173905	0.324169	0.06072	0.00533036	0.427152	0.315875	0.0831681	0.427796	0	0.315282	0.127795	0.122709	0.166423	0.295779	0.10455	0.373072	0.133875	0.179006	0.167912	0.278831	0.150112	0.0583166	0.179163
3.014	0.0521861	0.560739	0.19479	0.0797363	0.136195	0.446952	0.177396	0.387279	0.167481	0.632404	0.195384	0.244522	0.207996	0.578308	0.235442	0.195909	0.14173	0.537324	0.0231226	0.494393	0.101798	0.164665	0.071486	0.326087	0.0829497	0.308099	0.0596587	0.340517	0.0797214	0	0.401538	0.322602	0.0743695	0.460822	0.0125602	0.321985	0.0918049	0.130163	0.147097	0.247619	0.0740534	0.419091	0.125678	0.141216	0.204054	0.404333	0.131261	0.0427836	0.213142
3.151	0.0715639	0.541038	0.195162	0.111227	0.100044	0.437273	0.0862172	0.442879	0.109454	0.578642	0.126644	0.201246	0.229613	0.527216	0.3441	0.240562	0.154409	0.56489	0.0182638	0.482229	0.120645	0.163567	0.0448769	0.300611	0.0912829	0.282634	0.0590926	0.332782	0.0987227	0.0171883	0.418832	0.359209	0.107425	0.445783	0.0439899	0.304272	0.158301	0.144806	0.0899461	0.276369	0.0844794	0.405378	0.0750065	0.181541	0.212716	0.492796	0.138586	0.0428378	0.229757
3.288	0.0896913	0.559154	0.208108	0.143142	0.113721	0.46488	0.123216	0.334679	0.129568	0.544848	0.3103	0.243116	0.152808	0.42246	0.277379	0.163916	0.152674	0.602707	0.00184321	0.460712	0.127768	0.113799	0.0526426	0.294277	0.0889671	0.279453	0.0669945	0.375197	0.0928944	0.0884581	0.297655	0.404675	0.11765	0.359537	0.0558207	0.303305	0.149416	0.149294	0.081312	0.333195	0.115646	0.4839	0.146265	0.136882	0.222572	0.507331	0.17706	0.0558563	0.271764
3.425	0.0685934	0.550179	0.165379	0.174097	0.123626	0.500575	0.126164	0.361397	0.0844769	0.459009	0.140244	0.20679	0.233624	0.364182	0.187559	0.130169	0.136157	0.448513	0.0187662	0.450999	0.0719714	0.0453404	0.0564584	0.342806	0.117926	0.254855	0.0717787	0.384607	0.0893213	0.0985418	0.279373	0.478254	0.112543	0.32016	0.0614483	0.363639	0.167507	0.157371	0.0884208	0.343676	0.0708768	0.36385	0.111959	0.137468	0.160379	0.490578	0.162887	0.0227554	0.215835
3.562	0.0744391	0.488241	0.141958	0.193532	0.10383	0.531208	0.133503	0.513452	0.117761	0.362567	0.197133	0.220587	0.167708	0.375841	0.158775	0.0933875	0.107524	0.411293	0.0279815	0.500575	0.0713776	0.0665481	0.0866132	0.373036	0.135026	0.250564	0.0850627	0.361764	0.0923227	0.120977	0.264339	0.411215	0.109302	0.276972	0.0860794	0.336846	0.175108	0.251298	0.100321	0.372045	0.054	0.395008	0.104981	0.139024	0.212768	0.503985	0.222144	0.0366621	0.202116
3.699	0.0965652	0.456607	0.129417	0.21752	0.076561	0.540596	0.039191	0.320684	0.0706689	0.43602	0.2002	0.210612	0.17589	0.385484	0.186937	0.203032	0.144434	0.480853	0.0149123	0.506796	0.0618804	0.0294565	0.0595122	0.364265	0.135098	0.264094	0.0749761	0.382607	0.080833	0.128007	0.238956	0.390463	0.127753	0.249893	0.127805	0.334274	0.150146	0.297903	0.084593	0.301121	0.0456986	0.37589	0.0667651	0.124044	0.164207	0.506072	0.263974	0.0493846	0.229146
3.836	0.11348	0.424955	0.0846007	0.261274	0.0533036	0.600286	0.0755826	0.417091	0.115219	0.461083	0.133709	0.141869	0.224018	0.330692	0.174975	0.259056	0.152921	0.436802	0.0465802	0.539995	0.0442217	0.00231577	0.0181599	0.321498	0.08186	0.207422	0.0874229	0.423945	0.0835089	0.166878	0.28228	0.399669	0.127325	0.311364	0.156775	0.359102	0.143563	0.324679	0.110114	0.297889	0.0985983	0.346512	0.17577	0.209882	0.12476	0.587476	0.236869	0.0424375	0.270999
3.973	0.121897	0.344958	0.0647928	0.314759	0.0554397	0.671412	0.0373025	0.522833	0.0787962	0.474801	0.143343	0.204046	0.14357	0.326945	0.114929	0.201993	0.103231	0.401979	0.0103885	0.548585	0.0869589	0.00585194	0.03057	0.340152	0.0231825	0.128174	0.119931	0.448756	0.125664	0.268056	0.279782	0.499323	0.0852886	0.387389	0.131559	0.427767	0.138762	0.397559	0.11292	0.332514	0.0463825	0.502813	0.107117	0.160181	0.152274	0.636199	0.300887	0.0595592	0.235842
4.11	0.164156	0.278949	0.0839524	0.34449	0.0801	0.668359	0.0378135	0.416105	0.101856	0.408932	0.141267	0.242756	0.165282	0.380921	0.130868	0.222471	0.12857	0.393704	0.0489267	0.564922	0.104618	0.0155619	0.0575891	0.369868	0.0449535	0.0879784	0.140256	0.471592	0.0866454	0.35583	0.211409	0.466238	0.130845	0.318133	0.119668	0.410424	0.172463	0.373075	0.0572371	0.358014	0.0543143	0.468081	0.0960445	0.170086	0.166088	0.699365	0.260912	0.0670026	0.248201
4.247	0.198538	0.269449	0.076348	0.387831	0.0708154	0.667356	0.0887648	0.455074	0.158879	0.352048	0.195722	0.27326	0.145248	0.367915	0.103679	0.240674	0.0498927	0.333389	0.0938312	0.595831	0.0753843	0	0.0333318	0.368836	0.0513943	0.0363006	0.124867	0.463602	0.0832787	0.393674	0.218271	0.533288	0.104984	0.354932	0.0707935	0.365164	0.128788	0.407385	0.0630652	0.382606	0.0306388	0.453021	0.0690162	0.194171	0.183469	0.716543	0.296794	0.0598261	0.150236
4.384	0.228744	0.296578	0.0610649	0.430033	0.042172	0.688896	0.0559131	0.517911	0.155464	0.341983	0.175119	0.185807	0.21222	0.341572	0	0.275452	0.0436482	0.251963	0.115781	0.628709	0.0498609	0.00593299	0.0336963	0.385981	0.0375254	0.0280505	0.116168	0.4685	0.0674297	0.438818	0.144017	0.531062	0.0999837	0.324123	0.0877419	0.330945	0.114985	0.492813	0.0812904	0.327915	0.0528914	0.441911	0.0775248	0.223135	0.213204	0.79884	0.208796	0.0546846	0.115895
4.521	0.226389	0.292345	0.0526365	0.447565	0.0255979	0.698261	0.0774785	0.370035	0.14171	0.307114	0.14872	0.181672	0.118463	0.360164	0.131591	0.294985	0.00516153	0.462262	0.0561312	0.645086	0.0414025	0.0328677	0.0339866	0.418405	0.0583803	0.0253359	0.154226	0.51837	0.0697959	0.488045	0.240346	0.556083	0.145521	0.346364	0.0331098	0.329367	0.0954721	0.533231	0.0779878	0.313386	0.0598086	0.432131	0.102395	0.217185	0.259111	0.832743	0.213577	0.148679	0.0974964
4.658	0.219039	0.297476	0.0495975	0.431977	0.0139445	0.696237	0.104006	0.381347	0.1555	0.239856	0.155711	0.146582	0.217033	0.336351	0.164477	0.295795	0.0688922	0.430086	0.0566337	0.652592	0.151511	0.0877559	0.0312703	0.447309	0.0568504	0	0.130784	0.497173	0.0882493	0.478055	0.164062	0.513016	0.215526	0.286021	0.038901	0.328101	0.0850421	0.54442	0.091896	0.368384	0.105117	0.573099	0.105433	0.211217	0.243751	0.783405	0.216606	0.186342	0.130288
4.795	0.203318	0.327495	0.0387717	0.441259	0	0.666121	0.0853137	0.440678	0.134389	0.200548	0.119475	0.152873	0.153022	0.361822	0.149255	0.376307	0.104928	0.493108	0.0360242	0.734163	0.204784	0.147438	0.060745	0.518829	0.0698099	0.00486469	0.0813949	0.524995	0.0747825	0.519478	0.129831	0.471517	0.166155	0.332351	0.0255567	0.329563	0.0626282	0.578812	0.0664828	0.363521	0.0741606	0.572393	0.162852	0.250555	0.222045	0.753294	0.193184	0.220544	0.128219
4.932	0.202702	0.358376	0.0330988	0.51465	0.00855847	0.61777	0.166651	0.494628	0.0893881	0.162168	0.0855731	0.212622	0.154312	0.387389	0.115824	0.289638	0.151293	0.445912	0.0380349	0.741147	0.0957143	0.129155	0.0776062	0.564594	0.0895607	0.0443129	0.0357538	0.520526	0.0695656	0.62171	0.125028	0.42474	0.144525	0.370249	0.0744668	0.452399	0.0583094	0.584818	0.051776	0.337831	0.0665469	0.527017	0.0790802	0.239918	0.168048	0.790621	0.178718	0.299552	0.119375
5.069	0.206644	0.39357	0.0383057	0.606286	0.0472972	0.59415	0.119573	0.363075	0.116223	0.100662	0.0763771	0.233428	0.144539	0.413983	0.114431	0.303766	0.0759093	0.438494	0.0926587	0.813323	0.0977917	0.179249	0.0663665	0.527153	0.0751466	0.0587159	0.017837	0.474256	0.096015	0.787826	0.126493	0.367772	0.131834	0.343218	0.00647208	0.402891	0.0944772	0.63219	0.0915434	0.366287	0.036291	0.519272	0.0623026	0.363765	0.165828	0.855504	0.203756	0.334633	0.096548
5.206	0.205431	0.416239	0.0523191	0.708761	0.0661907	0.589655	0.0732276	0.457052	0.139751	0.130905	0.0805593	0.173846	0.135769	0.35396	0.129505	0.321655	0.132357	0.443766	0.0532831	0.780326	0.0952693	0.251851	0.0564432	0.494937	0.0802276	0.0349082	0	0.48648	0.094681	0.860275	0.0766778	0.383612	0.0593797	0.374926	0.0601499	0.442793	0.0983325	0.708909	0.0481713	0.311798	0.0183481	0.494291	0.103074	0.359507	0.131074	0.863848	0.141396	0.344608	0.0491181
5.343	0.208529	0.414991	0.00927252	0.71815	0.05661	0.57411	0.0387837	0.460548	0.14156	0.178008	0	0.169938	0.147334	0.374076	0.161626	0.408967	0.0854597	0.453798	0.0596501	0.745402	0.125987	0.306128	0.0530721	0.524505	0.0818964	0.0729534	0.0344621	0.457154	0.0804757	0.894985	0.103689	0.381113	0.127328	0.369563	0.0172881	0.381402	0.0967886	0.694922	0.0410769	0.368078	0.0176501	0.497319	0.0564761	0.242728	0.11465	0.794108	0.164047	0.374306	0.0707623
5.48	0.187602	0.400737	0.018437	0.742849	0.0447381	0.572699	0.0389688	0.411921	0.192963	0.188897	0.0756071	0.242159	0.125375	0.350153	0.202882	0.51069	0.0561625	0.44577	0.0321703	0.795219	0.120793	0.369346	0.083389	0.533936	0.113507	0.118049	0.0197188	0.526905	0.0997867	0.897369	0.0815999	0.35215	0.0665621	0.481366	0.0651003	0.355549	0.106212	0.709057	0.0586546	0.316164	0	0.430358	0.0752989	0.318993	0.101561	0.767342	0.174318	0.402858	0.0606031
5.617	0.136965	0.386675	0.0868496	0.796261	0.0413965	0.607307	0.0591346	0.388536	0.15523	0.226676	0.134793	0.244218	0.144513	0.406756	0.0831397	0.492371	0.037049	0.359224	0.0273115	0.789559	0.0471898	0.437761	0.102558	0.453667	0.0930558	0.134634	0.05202	0.576616	0.114738	0.866701	0.0603058	0.38518	0.066944	0.494757	0.0689483	0.394975	0.0983773	0.752063	0.0924212	0.423867	0.0717536	0.351849	0.085852	0.330808	0.09063	0.762165	0.127728	0.398959	0.0495294
5.754	0.0965526	0.379443	0.0748757	0.859253	0.047551	0.653515	0.0214395	0.388845	0.142606	0.151786	0.0870021	0.342229	0.169774	0.381062	0.104319	0.497152	0.0285689	0.316864	0.0231226	0.7055	0.0391762	0.468963	0.0902003	0.439505	0.102607	0.183725	0.0551935	0.626161	0.115072	0.788019	0.0713246	0.28604	0.06132	0.48548	0.0492292	0.453094	0.0282636	0.695146	0.0824632	0.442283	0.0301702	0.326299	0.0887752	0.341349	0.126059	0.752591	0.11543	0.380494	0.0448644
5.891	0.0956322	0.368016	0.0695607	0.819689	0.056476	0.674075	0.0553354	0.492889	0.14364	0.27131	0.126429	0.51051	0.1596	0.423038	0.0690025	0.512404	0.063186	0.373157	0.0365275	0.700524	0.0526801	0.474936	0.0902728	0.424851	0.0858437	0.230271	0.0436557	0.590208	0.107775	0.629847	0.0999496	0.304957	0.101421	0.480812	0.0574344	0.426733	0.110057	0.753074	0.0563162	0.440008	0.0297009	0.280087	0.0401815	0.33447	0.148366	0.752061	0.0879299	0.395731	0.0649461
6.028	0.131843	0.347524	0.0458426	0.748835	0.0604098	0.686065	0.0162037	0.477871	0	0.294209	0.136752	0.313785	0.04244	0.409935	0.0178538	0.513397	0.0522296	0.378258	0.0730542	0.717705	0.0614355	0.476642	0.0809098	0.491445	0.0859267	0.27379	0.0186663	0.60037	0.180961	0.64882	0.0948194	0.367826	0.114673	0.520237	0.0816419	0.44101	0.0500782	0.752343	0.0632594	0.4744	0.0564077	0.429575	0.0260133	0.356609	0.153683	0.797277	0.100637	0.397946	0.0669881
6.165	0.183959	0.341355	0.0247042	0.657044	0.0540086	0.700438	0.0236094	0.417292	0.0912336	0.261273	0.145794	0.4037	0.101177	0.518088	0.0810354	0.526718	0.117607	0.402467	0.0785839	0.716098	0.0841397	0.484808	0.0724902	0.534792	0.0824188	0.288651	0.0419971	0.607767	0.106004	0.561061	0.0622315	0.242009	0.0831917	0.399112	0.110958	0.539531	0.0713129	0.766051	0.0764121	0.513956	0.0528184	0.366093	0.0460195	0.378431	0.165984	0.82922	0.106454	0.353778	0.0542541
6.302	0.209119	0.351538	0.0432762	0.623471	0.0463102	0.700966	0.0529286	0.51354	0.063287	0.314833	0.178704	0.604438	0.126993	0.364589	0.0815333	0.518941	0.0816408	0.470771	0.0328411	0.719951	0.149285	0.488872	0.0534983	0.518909	0.107129	0.329371	0.0361525	0.559439	0.0843188	0.564596	0.059198	0.251526	0.0851984	0.475624	0.130512	0.622317	0.0762479	0.668844	0.0107783	0.406345	0.0768686	0.312141	0.072365	0.301326	0.144033	0.797477	0.0929225	0.339587	0.0543476
6.439	0.193143	0.340834	0.0595453	0.621682	0.0613898	0.692668	0.0518103	0.426402	0.0769748	0.421362	0.0323679	0.503386	0.17601	0.422409	0.105919	0.469492	0.0036859	0.383655	0.0333436	0.737776	0.117677	0.543149	0.0221225	0.505589	0.129837	0.344996	0.0423958	0.601523	0.0857799	0.55558	0.0339931	0.234114	0.105873	0.442583	0.138558	0.60886	0.088137	0.696344	0	0.504542	0.0863105	0.35136	0.07709	0.347682	0.132436	0.83534	0.0947777	0.313571	0.0695989
6.576	0.154565	0.31951	0.0302015	0.55501	0.0809177	0.68453	0.0603565	0.402923	0.149573	0.335361	0.130543	0.543745	0.0733693	0.416092	0.143802	0.421095	0.0489807	0.420228	0.0559637	0.728462	0.0734558	0.514547	0	0.503928	0.0856058	0.338442	0.0526419	0.645252	0.057393	0.606228	0.0417776	0.30842	0.106383	0.438771	0.119928	0.603944	0.0899394	0.709265	0.0122389	0.481753	0.068647	0.357873	0.0568458	0.382167	0.127949	0.910732	0.0830806	0.334196	0.0496538
6.713	0.110199	0.331479	0.00722621	0.502263	0.077555	0.669533	0.00031104	0.426543	0.0997456	0.453313	0.15369	0.502067	0.117347	0.273417	0.153262	0.379656	0.0317482	0.507615	0.064174	0.726014	0.0675197	0.516172	0.00984739	0.511814	0.0809642	0.421713	0.0657506	0.671654	0.0761482	0.648634	0.0554953	0.28098	0.0685052	0.385862	0.123024	0.673933	0.0148783	0.793469	0.0461495	0.485856	0.0741942	0.370151	0.0807037	0.405933	0.126129	0.934331	0.0814164	0.336602	0.081639
6.85	0.0792376	0.369146	0.0145267	0.50306	0.0526903	0.651085	0.0386282	0.355685	0.00964213	0.418427	0.081859	0.555823	0.120101	0.382609	0.0551676	0.449677	0.0164409	0.411564	0.0502666	0.750902	0.0424412	0.452915	0.0118616	0.602469	0.099202	0.504088	0.0539576	0.682568	0.0889719	0.685326	0.0592575	0.358393	0.0659034	0.311617	0.101386	0.668856	0.051724	0.865509	0.0480058	0.459485	0.0583231	0.381303	0.101254	0.391276	0.1405	0.91816	0.103378	0.385694	0.101722
6.987	0.0788885	0.410871	0.035037	0.508895	0.0126192	0.618095	0.051714	0.322722	0.0530558	0.324869	0.0584223	0.516679	0.121077	0.418375	0.0488904	0.440527	0.0137176	0.548227	0.0137391	0.812039	0.0458542	0.463723	0.0232447	0.680484	0.0803317	0.541834	0.0614129	0.662578	0.0964835	0.725659	0.0516588	0.284156	0.0697739	0.239278	0.0820509	0.697205	0.0982099	0.871285	0.0452645	0.491173	0.0181842	0.320579	0.0654715	0.328791	0.160267	0.964766	0.10951	0.381349	0.0634009
7.124	0.0875015	0.433255	0.0677913	0.519174	0.00112797	0.578277	0	0.386255	0.197261	0.442508	0.0675321	0.438722	0.100241	0.462256	0.101023	0.418908	0.0107157	0.448978	0	0.859728	0.0848815	0.530271	0.045687	0.638141	0.0395634	0.60024	0.0530167	0.641517	0.0893213	0.720593	0.0486328	0.294242	0.0856461	0.243479	0.114024	0.664475	0.0416851	0.841377	0.0416309	0.531189	0.0541639	0.428825	0.0754007	0.272122	0.164117	0.944611	0.111017	0.402812	0.0482122
7.261	0.0796692	0.418344	0.0736263	0.548345	0.0317453	0.585764	0.0793447	0.392261	0.261961	0.557118	0.0499839	0.41012	0.0946395	0.525976	0.0440653	0.515467	0.0383283	0.463907	0.000669959	0.856477	0.0264141	0.549082	0.0703072	0.607313	0.0580882	0.629087	0.0340873	0.651035	0.0711299	0.745244	0.0424542	0.259659	0.0729885	0.275474	0.0854759	0.628981	0.0384645	0.807051	0.0276292	0.474486	0.047164	0.477282	0.0842721	0.311695	0.14984	0.944611	0.145304	0.420005	0.0398226
7.398	0.063319	0.39667	0.0392242	0.557072	0.0659862	0.598924	0.0631707	0.367707	0.22555	0.597914	0.14896	0.297182	0.132193	0.571195	0.0871289	0.689533	0.119868	0.55679	0.0180963	0.889713	0	0.553428	0.0842944	0.624744	0.0603193	0.521121	0.0491894	0.658405	0.054066	0.7976	0.0673022	0.252857	0.0811077	0.287737	0.130144	0.650675	0.0664959	0.836139	0.041451	0.476804	0.0483366	0.479923	0.0577743	0.323157	0.140647	0.987934	0.179591	0.44384	0.0709104
7.535	0.0622463	0.39994	0.0214153	0.544625	0.0903715	0.585875	0.174789	0.419933	0.205851	0.615633	0.163977	0.292716	0.0971127	0.529239	0.149499	0.505449	0.0803995	0.539197	0.00971769	0.902559	0.022705	0.615345	0.0406848	0.578983	0.0386566	0.504559	0.0450431	0.629627	0.0350568	0.789737	0.0815999	0.312832	0.11127	0.314442	0.124683	0.625165	0.0861743	0.815131	0.0711309	0.595582	0.0303118	0.499027	0.0383123	0.385386	0.114413	0.952033	0.144199	0.448256	0.0933354
7.672	0.0669305	0.426605	0.0425739	0.529539	0.0930928	0.561948	0.151632	0.406546	0.258276	0.632028	0.0915847	0.327267	0.125108	0.494539	0.106909	0.524656	0.105276	0.576156	0.0055288	0.881967	0.0874047	0.58528	0.0206011	0.558589	0.0456402	0.481269	0.0311052	0.630354	0.0420363	0.783802	0.0287737	0.316681	0.101222	0.293961	0.145787	0.707212	0.0633108	0.781362	0.0112172	0.599531	0.0509098	0.532543	0.0765588	0.394683	0.110993	0.850196	0.124965	0.42598	0.0414727
7.809	0.0699136	0.427796	0.0527243	0.521559	0.0757079	0.527156	0.122675	0.388559	0.253286	0.584925	0.0927365	0.287658	0.164887	0.516727	0.145669	0.494841	0.099019	0.553305	0.0232901	0.858163	0.0614355	0.599987	0.0340963	0.559384	0.0609145	0.616825	0.0641798	0.636587	0.0660798	0.834973	0.0880609	0.311507	0.132616	0.278742	0.124025	0.633701	0.0551629	0.826603	0.029097	0.65529	0.0398312	0.529002	0.0469855	0.377162	0.0940402	0.783275	0.120818	0.435279	0.0449852
7.946	0.0727381	0.414579	0.0453563	0.503705	0.0584288	0.518797	0.0737608	0.357854	0.19764	0.523778	0.0922623	0.291452	0.119693	0.416981	0.0881959	0.522775	0.11534	0.533895	0.0231226	0.838774	0.0360601	0.619083	0.0415953	0.602469	0.0735387	0.575017	0.0487189	0.641354	0.0585126	0.875211	0.0555623	0.315118	0.134477	0.262316	0.135753	0.58324	0.0274391	0.681639	0.0386881	0.639903	0.0650853	0.479988	0	0.365242	0.110017	0.774211	0.122817	0.466016	0.0409622
8.083	0.0711958	0.42161	0.0291547	0.489048	0.0557922	0.547207	0.0743088	0.389232	0.167421	0.448439	0.132249	0.295258	0	0.429613	0.172136	0.558956	0.0314188	0.490072	0.0313329	0.814488	0.0372477	0.564762	0.0603813	0.678292	0.00646958	0.515324	0.0521954	0.600762	0.0458636	0.911614	0.0620679	0.369419	0.128451	0.210468	0.0755265	0.50003	0.069189	0.64514	0.0518552	0.578784	0.0810621	0.406889	0.00498451	0.347084	0.0742758	0.715003	0.136369	0.475294	0.0391014
8.22	0.0880157	0.401962	0.0167351	0.492752	0.0665855	0.562105	0.112448	0.514536	0.0697552	0.451391	0.0790626	0.317932	0.0873467	0.469794	0.176303	0.535721	0.0623627	0.60548	0.0420563	0.790483	0.0547575	0.5672	0.0394756	0.710424	0.0539488	0.618179	0.0436397	0.652938	0.0554238	0.941557	0.114768	0.405674	0.0638788	0.218393	0.0502513	0.495385	0.097697	0.684514	0.0359756	0.531826	0.0120009	0.4397	0.0662706	0.401241	0.0696928	0.743357	0.114155	0.50935	0.0440929
8.357	0.1131	0.389341	0.0143039	0.486381	0.0847951	0.55971	0.0850619	0.499153	0.078171	0.509659	0.0719361	0.309874	0.0512168	0.394917	0.190256	0.559011	0.0389933	0.688122	0.129856	0.779966	0.07954	0.62867	0.0676492	0.758366	0.114633	0.58544	0.0281709	0.667414	0.0373992	0.959473	0.104983	0.392872	0.0563296	0.285321	0.0732716	0.644952	0.0496795	0.74419	0.024744	0.546054	0.0634784	0.375621	0.0919977	0.394299	0.0711192	0.804542	0.0951119	0.569022	0.0782394
8.494	0.112439	0.40543	0.0067062	0.481309	0.101891	0.576176	0.0220764	0.445885	0.121939	0.411839	0.124378	0.32063	0.105087	0.375944	0.173606	0.532425	0.0453898	0.588256	0.161189	0.804171	0.0405118	0.645327	0.0796837	0.81233	0.0598765	0.589112	0.0493249	0.660662	0.0623002	0.968479	0.120106	0.283809	0.0365826	0.333488	0.12362	0.694981	0.039248	0.822411	0.0372779	0.552671	0.050141	0.327319	0.0783423	0.339046	0.0560736	0.812876	0.0955825	0.623752	0.0636885
8.631	0.0948959	0.390225	0	0.495721	0.103393	0.595619	0.0769231	0.452775	0.126778	0.405778	0.225633	0.372187	0.0763439	0.334623	0.15133	0.595765	0.0592088	0.573182	0.165043	0.769568	0.0258211	0.584995	0.0570018	0.868438	0.0434142	0.609038	0.0484239	0.713997	0.058592	0.981226	0.102626	0.279268	0.0390034	0.36085	0.127175	0.701163	0.0729996	0.839945	0.0630724	0.583629	0.0791647	0.421105	0.0765435	0.31324	0.0389054	0.862847	0.136171	0.701797	0.0607146
8.768	0.0700025	0.372197	0.000283646	0.51126	0.0874459	0.58879	0.109234	0.440318	0.154094	0.40027	0.147987	0.397717	0.054031	0.329135	0.185556	0.606889	0.0540346	0.615944	0.116787	0.732758	0.0467448	0.649107	0.0478143	0.892667	0.0911465	0.579461	0.0684616	0.679604	0.0466338	0.90258	0.0444617	0.268801	0.0477055	0.385235	0.0998614	0.619081	0.0706998	0.804766	0.0674182	0.513913	0.0842574	0.345606	0.0694755	0.293992	0.0630678	0.908753	0.14557	0.803989	0.0815599
8.905	0.0575177	0.359607	0.00292425	0.537907	0.0957929	0.590523	0.0666884	0.519411	0.126965	0.407406	0.144131	0.399231	0.0601072	0.31544	0.105255	0.485644	0.000189995	0.659554	0.081097	0.715657	0.0712296	0.651381	0.0533523	0.836763	0.0390867	0.574401	0.0607591	0.734326	0.0741313	0.850077	0.0518447	0.267801	0	0.487133	0.0974445	0.534213	0.0736613	0.733608	0.0481353	0.38761	0.0540692	0.329474	0.0455794	0.287277	0.0453665	0.873304	0.111624	0.774916	0.079914
9.042	0.0530239	0.361598	0.0138851	0.57647	0.109759	0.618157	0.045945	0.489005	0.137028	0.264786	0.164987	0.237931	0.0688974	0.297246	0.126488	0.602069	0	0.52805	0.0901456	0.697231	0.0609906	0.497241	0.0396393	0.768455	0.0412856	0.567403	0.0551776	0.769321	0.0618555	0.882039	0.0730867	0.353664	0.041337	0.425102	0.100727	0.536674	0.0635445	0.695083	0.0821178	0.406149	0.062857	0.358428	0.0507889	0.255392	0	0.841211	0.112463	0.691964	0.111447
9.179	0.0435159	0.397878	0.019889	0.601263	0.116477	0.667238	0.0683917	0.454584	0.14129	0.338049	0.159856	0.299514	0.154834	0.329562	0.18504	0.634575	0.0890063	0.493283	0.10288	0.704377	0.073307	0.493543	0.0417346	0.789937	0.0543916	0.667815	0.0603684	0.719948	0.0631577	0.783685	0.0734287	0.387183	0.0895895	0.365916	0.0729201	0.456455	0.0746207	0.679031	0.0665764	0.470935	0.0572525	0.282809	0.0672374	0.273045	0.0185896	0.741886	0.091197	0.665927	0.0773809
9.316	0.0609261	0.406375	0.0174172	0.599033	0.147454	0.688295	0.0860247	0.493254	0.144933	0.365196	0.104242	0.280786	0.131558	0.322513	0.199806	0.619765	0.0314252	0.480632	0.121478	0.704979	0.0477835	0.515929	0.057536	0.8182	0.0554178	0.74655	0.0370136	0.722937	0.0650078	0.700352	0.0687967	0.41911	0.0783465	0.332822	0.00094911	0.424634	0.0702078	0.698577	0.108186	0.408075	0.0694255	0.274751	0.054365	0.299052	0.0407912	0.707604	0.0756189	0.772502	0.119721
9.453	0.0672669	0.376348	0.0167351	0.587447	0.147933	0.679622	0.0808036	0.472108	0.168154	0.328231	0.149588	0.171554	0.0901675	0.474343	0.149238	0.608339	0.0685185	0.542728	0.110755	0.706784	0.0324983	0.601205	0.0657767	0.787787	0.104385	0.769165	0.0407293	0.760878	0.0882176	0.763147	0.0821426	0.437483	0.0838189	0.322412	0.0546556	0.460386	0.0934237	0.685403	0.0717928	0.503757	0.0255365	0.259046	0.050038	0.275473	0.0455458	0.773743	0.0972263	0.735156	0.0834739
9.59	0.0494632	0.334504	0.0163231	0.582821	0.0948411	0.680682	0.0431975	0.454556	0.157725	0.331132	0.0702977	0.303045	0.0895392	0.422135	0.183131	0.542378	0.0319698	0.501994	0.0852859	0.72489	0.0368019	0.741168	0.0498614	0.791117	0.078734	0.783653	0.0398841	0.707328	0.0644441	0.770043	0.0528782	0.433866	0.102604	0.332098	0.108783	0.363327	0.0392264	0.642525	0.0735053	0.47424	0.0736235	0.309894	0.0431705	0.320415	0.030847	0.783939	0.134146	0.784741	0.0728287
9.727	0.0397711	0.29083	0.00401156	0.586819	0.0637938	0.694734	0.0433086	0.463526	0.153264	0.341245	0.156782	0.161575	0.172741	0.360689	0.136156	0.59658	0.0213111	0.55403	0.091318	0.698515	0.052977	0.789027	0.0365746	0.820323	0.0665357	0.763783	0.0777669	0.682611	0.0942681	0.776408	0.0628561	0.437206	0.0615717	0.296159	0.084221	0.369608	0.0107562	0.623852	0.0810601	0.441026	0.0571922	0.341302	0.071833	0.293686	0.0202912	0.768347	0.132243	0.710929	0.0980249
9.864	0.0376321	0.287906	0.00127641	0.610938	0.0535927	0.705748	0.0545208	0.52323	0.108228	0.411671	0.081705	0.130307	0.192581	0.449408	0.10327	0.456047	0.0552315	0.536108	0.113101	0.712607	0.0520864	0.798777	0.0331191	0.805468	0.0870595	0.785877	0.122563	0.680851	0.094014	0.819999	0.0886929	0.453748	0.0515022	0.296981	0.0639419	0.37813	0	0.626559	0.0527618	0.368495	0.0474873	0.343934	0.068498	0.284078	0.0177763	0.796168	0.130135	0.607919	0.0353545
10.001	0.0353027	0.309165	0.0283781	0.622278	0.044865	0.684102	0.0347846	0.515448	0.0944256	0.39018	0.0869651	0.241558	0.102875	0.482506	0.0664418	0.504704	0.00644083	0.500421	0.11729	0.785585	0.118567	0.81844	0.0297287	0.802349	0.0668397	0.748202	0.134922	0.688492	0.0724559	0.838115	0.0533392	0.498591	0.0670634	0.254405	0.125365	0.384696	0.0405113	0.720667	0.0707567	0.442835	0.0579715	0.412695	0.0924592	0.258307	0.0105509	0.806978	0.111126	0.684646	0.0387491
10.138	0.0338112	0.350282	0.0748082	0.603493	0.0735225	0.683402	0.00535432	0.446207	0.103887	0.388833	0.168522	0.28422	0.12109	0.498948	0.116103	0.470845	0.0419192	0.527539	0.0864592	0.775388	0.0986823	0.746816	0.0427682	0.802351	0.0668202	0.744557	0.0996385	0.629638	0.0757353	0.915005	0.0577779	0.454124	0.0760444	0.281226	0.0969942	0.399008	0.0265607	0.708287	0.0795276	0.490799	0.0467684	0.427311	0.0919364	0.325995	0.0528777	0.791609	0.109749	0.721191	0.0491304
10.275	0.0398409	0.370481	0.126729	0.621249	0.10285	0.661193	0.026231	0.416661	0.0741314	0.488991	0.212408	0.261974	0.120756	0.431919	0.110845	0.440647	0.0164156	0.493052	0.0623308	0.772739	0.0792431	0.74064	0.0756688	0.826451	0.0587622	0.695159	0.09617	0.600128	0.122679	0.946845	0.0937859	0.500233	0.104226	0.31892	0.10337	0.399887	0.0619465	0.748257	0.103459	0.515685	0.000636959	0.446686	0.0983753	0.282056	0.0630867	0.853074	0.0779174	0.614474	0.0591809
10.412	0.0604755	0.35761	0.149839	0.675764	0.0838575	0.632771	0.0545504	0.40491	0.147806	0.490093	0.173573	0.333532	0.112601	0.45508	0.177945	0.539478	0.0294872	0.547829	0.0477534	0.821311	0.0614355	0.739704	0.0927866	0.893507	0.053406	0.640758	0.147951	0.673535	0.154774	0.924626	0.112894	0.42141	0.0875771	0.319805	0.11284	0.423475	0.0397948	0.768619	0.101027	0.519886	0.0507355	0.449984	0.105104	0.273949	0.0854228	0.934423	0.0954393	0.578391	0.0801269
10.549	0.0827412	0.401923	0.115093	0.725072	0.0740724	0.656652	0.0426346	0.366254	0.0775458	0.450291	0.136315	0.308771	0.145275	0.495438	0.17788	0.486703	0.0558142	0.653016	0.0418888	0.817338	0.052977	0.772491	0.0819215	0.880697	0.0823604	0.645684	0.130345	0.646474	0.20826	0.913177	0.0916892	0.498709	0.0922235	0.324833	0.0370661	0.392224	0.0718397	0.716838	0.0423576	0.507289	0.0319187	0.360843	0.0955715	0.207186	0.0914034	0.952003	0.0578038	0.603127	0.0668493
10.686	0.0871144	0.484017	0.0520558	0.757767	0.0959479	0.689565	0.0310521	0.412038	0.0232998	0.3991	0.209828	0.259865	0.117186	0.44536	0.126393	0.506077	0.0347311	0.589572	0.0559637	0.808264	0.0400669	0.699442	0.0586819	0.840525	0.120475	0.661004	0.115363	0.632721	0.281756	0.959793	0.0389449	0.506615	0.0887328	0.297248	0.100109	0.458519	0.160328	0.674329	0.0568846	0.525473	0.0894477	0.325001	0.109083	0.196063	0.0865003	0.903412	0.0620734	0.578295	0.0804907
10.823	0.0836425	0.558554	0.0230901	0.745932	0.096378	0.703671	0.0323111	0.450755	0.077131	0.361279	0.216246	0.317372	0.0684027	0.497611	0.13551	0.478646	0.0465298	0.554973	0.0519423	0.837409	0.0452604	0.65918	0.075041	0.813274	0.118349	0.698324	0.0973501	0.686032	0.243365	0.965347	0.0564693	0.505407	0.0992878	0.290212	0.0769	0.449265	0.150007	0.633477	0.0616405	0.407946	0.0612665	0.316997	0.115416	0.196407	0.080662	0.874557	0.0418301	0.574109	0.0965171
10.96	0.0545472	0.630697	0.00949538	0.701953	0.0891308	0.69841	0.0218468	0.463923	0.0830822	0.35698	0.199529	0.25695	0.110823	0.449016	0.11893	0.499137	0.0774673	0.46692	0.0214469	0.872492	0.0614355	0.659831	0.0551412	0.802299	0.0869774	0.754072	0.0783489	0.679539	0.183256	0.961651	0.0643654	0.492739	0.187227	0.356896	0.14009	0.465436	0.110278	0.574284	0.0433937	0.426951	0.0369473	0.302581	0.126183	0.192554	0.0723297	0.81876	0.037997	0.591998	0.116974
11.097	0.0589839	0.715785	0.0253525	0.708769	0.0984365	0.687801	0.04339	0.430048	0.110638	0.353417	0.15847	0.22431	0.124807	0.432812	0.0907566	0.583642	0.146315	0.452536	0.0231226	0.880682	0.0516414	0.720407	0.031845	0.788576	0.0764869	0.791918	0.05383	0.730327	0.0961579	0.984709	0.0643282	0.537577	0.206184	0.276476	0.0928993	0.450339	0.109102	0.555621	0.0341336	0.427436	0.097968	0.312317	0.112736	0.242017	0.0722533	0.777502	0.0268728	0.554689	0.0978976
11.234	0.095372	0.780188	0.0570803	0.768883	0.11733	0.687147	0.102495	0.389775	0.0884924	0.386271	0.143152	0.272033	0.0354814	0.530576	0.0814859	0.655787	0.133965	0.460082	0.0154148	0.881284	0.0445186	0.718862	0.0349874	0.75085	0.0673164	0.86238	0.0439587	0.673309	0.062729	0.930276	0.0507443	0.545007	0.175618	0.259749	0.0772073	0.475581	0.082865	0.597824	0.0466747	0.447539	0.100253	0.317319	0.104567	0.242525	0.0667513	0.81911	0.0377242	0.592995	0.125172
11.371	0.0885932	0.748238	0.0511305	0.794999	0.100016	0.710297	0.0992068	0.456182	0.0278684	0.355878	0.265866	0.224515	0.0201672	0.434232	0.098166	0.789442	0.154206	0.43792	0.0333436	0.930579	0.0621773	0.688514	0.0699308	0.70079	0.0708699	0.914618	0.0664124	0.691486	0.0792688	0.950213	0	0.490354	0.146621	0.257318	0.138996	0.57695	0.00995025	0.601847	0.050999	0.446588	0.0862874	0.298119	0.107719	0.189	0.0533611	0.811512	0.0547345	0.556399	0.148908
11.508	0.107806	0.744206	0.0423915	0.764709	0.0995011	0.751325	0.0331405	0.407289	0.0211357	0.316836	0.298875	0.211553	0.0954015	0.561782	0.142427	0.833086	0.159893	0.524835	0.0430621	0.935356	0.140678	0.691886	0.0769607	0.68814	0.076348	0.915229	0.0441261	0.73028	0.0484998	1.00371	0.0214576	0.531304	0.265806	0.328942	0.124246	0.519076	0.0601696	0.662673	0.0351553	0.410326	0.0605975	0.320586	0.117569	0.216573	0.0468047	0.784256	0.0521837	0.501589	0.12749
11.645	0.0693043	0.753597	0.0460789	0.708214	0.114588	0.742396	0.0671105	0.32741	0.0698453	0.42611	0.183102	0.187848	0.0770057	0.57652	0.0975555	0.810013	0.0565108	0.46692	0.0723843	0.93086	0.09616	0.723332	0.0472025	0.660938	0.0799456	0.905366	0.0677918	0.610861	0	1.07821	0.00429003	0.447203	0.287166	0.320788	0.122029	0.599032	0.0564061	0.690697	0.0198225	0.417942	0.0297992	0.301967	0.188313	0.248689	0.0509589	0.785424	0.0572581	0.431272	0.0945656
11.782	0	0.714012	0.0391701	0.664537	0.136837	0.722861	0.0986958	0.393902	0.122096	0.431239	0.196985	0.195173	0.139934	0.554395	0.137335	0.803073	0.100938	0.481216	0.0866267	0.956832	0.0442217	0.740396	0.0419084	0.677009	0.0526448	0.893145	0.0489103	0.675774	0.071646	1.03684	0.0525585	0.460223	0.249273	0.345528	0.101479	0.655819	0.0807233	0.671494	0.0378319	0.316097	0.0426911	0.264692	0.252686	0.271895	0.0465476	0.781057	0.0770853	0.497845	0.0808466
11.919	0.015341	0.666679	0.0310322	0.666702	0.119748	0.703564	0.104228	0.43857	0.0795296	0.483603	0.144193	0.203776	0.137855	0.582168	0.120584	0.862474	0.117797	0.407647	0.0914855	0.944186	0.0115754	0.73491	0.0386023	0.75607	0.0143625	0.88044	0.0491495	0.606627	0.0996438	1.17887	0.0978678	0.568757	0.221185	0.39744	0.0838386	0.619344	0.097286	0.661883	0.0497758	0.426737	0.0471342	0.249436	0.414353	0.294006	0.0725574	0.843085	0.095794	0.541354	0.0857281
12.056	0.0545663	0.603099	0.0214423	0.656782	0.0956589	0.653545	0.105072	0.422088	0.0268465	0.451683	0.121988	0.137805	0.119954	0.485487	0.120655	0.752101	0.0994117	0.420179	0.137564	0.868076	0.00296807	0.705333	0.0332297	0.811363	0.0148341	0.86477	0.0597146	0.59231	0.0459748	1.18389	0.0952209	0.592427	0.248208	0.381695	0.0759347	0.523048	0.0438769	0.630744	0.0637199	0.381821	0.0738761	0.327028	0.487911	0.273178	0.0826235	0.879921	0.0891576	0.585981	0.0561466
12.193	0.0681555	0.585412	0.0121698	0.612534	0.106706	0.624871	0.0885204	0.336824	0.0924358	0.531293	0.121637	0.179765	0.0887905	0.539908	0.113092	0.794912	0.0408236	0.479324	0.219667	0.841101	0.0360601	0.716018	0.0372488	0.870105	0.0489186	0.889564	0.0811876	0.624124	0.0562099	1.25774	0.0982172	0.651655	0.23063	0.318079	0.146395	0.554146	0.0339837	0.747671	0.0555679	0.457737	0.0850091	0.294385	0.493267	0.219979	0.0640437	0.872843	0.036933	0.596973	0.0229794
12.33	0.103046	0.598909	0.0230023	0.608254	0.135307	0.607035	0.103139	0.312869	0.196786	0.589558	0.18158	0.194126	0.129553	0.545741	0.179705	0.750601	0.07368	0.503313	0.278479	0.850777	0.0543126	0.69676	0.0349452	0.936173	0.0683383	0.906597	0.0835079	0.633843	0.0582982	1.32901	0.0891167	0.613886	0.170536	0.255348	0.133298	0.453878	0.0358269	0.699407	0.10053	0.496895	0.0683356	0.308791	0.487921	0.197898	0.0666476	0.862461	0.0138661	0.537092	0.0518188
12.467	0.122373	0.619945	0.0415136	0.623655	0.159523	0.593473	0.130177	0.370339	0.0867251	0.573985	0.272007	0.149364	0.117561	0.605867	0.12324	0.664836	0.0652316	0.439667	0.322212	0.827173	0.0614355	0.763635	0.0285617	0.955695	0.0787806	0.914531	0.103107	0.633133	0.0232494	1.24698	0.12534	0.531398	0.197554	0.262647	0.105467	0.430722	0.136891	0.692123	0.0874422	0.515268	0.0911872	0.409081	0.42684	0.196499	0.085385	0.783095	0.0680823	0.46426	0.0732422
12.604	0.103433	0.633009	0.0434924	0.627399	0.141948	0.564431	0.112478	0.363982	0.0659741	0.553493	0.216147	0.178529	0.0497128	0.642285	0.145883	0.685834	0.062806	0.441045	0.258708	0.821752	0.0848815	0.768915	0.0649126	0.951142	0.0750831	0.946223	0.132434	0.632414	0.0602516	1.2339	0.107377	0.579649	0.232103	0.222293	0.122369	0.461692	0.0882111	0.612167	0.0972492	0.464287	0.0640259	0.304007	0.369355	0.238379	0.164884	0.791121	0.0873775	0.439057	0.0841843
12.741	0.0839471	0.653782	0.0332203	0.637568	0.100305	0.535145	0.145418	0.338975	0.21045	0.489451	0.110956	0.183267	0.0467315	0.556818	0.147934	0.705499	0.0787339	0.500513	0.157671	0.774185	0.086366	0.772085	0.0995515	0.891543	0.0825382	0.91569	0.158356	0.608306	0.0741631	1.30533	0.0958975	0.512912	0.252146	0.18016	0.127798	0.482731	0.0595303	0.640856	0.0698358	0.443387	0.0916006	0.346216	0.367448	0.197735	0.149333	0.731524	0.0877458	0.469197	0.0485264
12.878	0.0788948	0.665891	0.0265817	0.633202	0.0772307	0.537696	0.107286	0.320511	0.210961	0.461641	0.250036	0.154963	0.142588	0.612937	0.175805	0.521756	0.0651176	0.497493	0.146277	0.741348	0.0707846	0.752665	0.112833	0.798968	0.0885751	0.830504	0.152679	0.61955	0.110204	1.21402	0.113065	0.435133	0.301439	0.269522	0.132519	0.518947	0.0394593	0.507308	0.068627	0.406897	0.0456822	0.3165	0.456421	0.197916	0.126154	0.727971	0.060266	0.495985	0.0263228
13.015	0.077892	0.64788	0.0388122	0.624961	0.0872203	0.545321	0.11567	0.35777	0.164565	0.517027	0.209249	0.280897	0.150569	0.457684	0.213516	0.491793	0.12002	0.461342	0.120976	0.74777	0.0557962	0.778301	0.070951	0.701951	0.0620584	0.850139	0.122906	0.610203	0.0858831	1.20175	0.110493	0.427935	0.282078	0.256253	0.164359	0.597846	0.0190737	0.514012	0.0934861	0.459479	0.0814123	0.308989	0.464165	0.233592	0.104249	0.698371	0.0559281	0.499438	0.0467216
13.152	0.0788504	0.6045	0.0679264	0.643947	0.0840056	0.549174	0.076649	0.352441	0.179582	0.568572	0.184685	0.376244	0.0996863	0.538073	0.323602	0.51468	0.136347	0.468622	0.0630008	0.735046	0.0360601	0.768063	0.0481695	0.619994	0.0693552	0.855265	0.0811397	0.599859	0.0566069	1.14719	0.0502834	0.405417	0.297829	0.315852	0.127397	0.623168	0.0388046	0.611693	0.0698358	0.522345	0.152036	0.327237	0.370938	0.198521	0.0587595	0.662261	0.0585267	0.536559	0.0268398
13.289	0.0786346	0.545797	0.0871063	0.666436	0.0863673	0.561466	0.019203	0.313766	0.136847	0.5863	0.124439	0.189703	0.161699	0.379758	0.422657	0.558696	0.102357	0.419144	0.0492617	0.708551	0.0394731	0.765342	0.0642131	0.57248	0.0839268	0.778943	0.0633266	0.590105	0.0495876	1.05443	0.0801798	0.443622	0.380991	0.294958	0.16337	0.52483	0.0415848	0.569744	0.0953928	0.447067	0.130197	0.287694	0.281013	0.152084	0.0626026	0.719745	0.0322473	0.556704	0.0395716
13.426	0.108841	0.505735	0.0867416	0.666008	0.100044	0.527776	0.0346069	0.397894	0.183152	0.492995	0.108659	0.311339	0.186471	0.309664	0.598925	0.521585	0.115574	0.444062	0.0559637	0.710278	0.0313115	0.750797	0.0835417	0.528067	0.080347	0.745903	0.0747768	0.578165	0.0789829	1.00943	0.119429	0.423631	0.474801	0.333814	0.256134	0.500079	0.0697134	0.490627	0.115287	0.400826	0.155989	0.25504	0.225096	0.182738	0.0771908	0.727308	0.049244	0.529874	0.0334951
13.563	0.172007	0.477319	0.0951159	0.658502	0.112402	0.459864	0.0515215	0.376729	0.191208	0.559388	0.0637194	0.317313	0.174199	0.379367	0.703326	0.505883	0.184574	0.474536	0.0703736	0.672423	0.0276017	0.735399	0.0629946	0.479121	0.050976	0.693459	0.0962816	0.616494	0.0970949	0.976567	0.110262	0.435123	0.438229	0.381525	0.248334	0.460284	0.104485	0.564597	0.0598993	0.429944	0.143128	0.232053	0.204601	0.23335	0.0448264	0.768006	0.0450153	0.493792	0.0602638
13.7	0.162556	0.419413	0.0869104	0.648978	0.131112	0.466364	0.0689397	0.299444	0.166964	0.579518	0.0885543	0.384281	0.227548	0.450785	0.687749	0.533026	0.13824	0.514282	0.0609901	0.696308	0.023298	0.740802	0.106882	0.386368	0.0710477	0.741388	0.112588	0.647934	0.0631022	0.937419	0.0972061	0.46421	0.33557	0.270466	0.226134	0.480039	0.0592789	0.542075	0.0574314	0.353095	0.0826482	0.210089	0.181159	0.237182	0.0724025	0.768553	0.0158986	0.487774	0.0753245
13.837	0.0920651	0.386929	0.0488479	0.613857	0.195872	0.504787	0.144278	0.367455	0.0878011	0.514095	0.115588	0.403582	0.250121	0.433925	0.485246	0.592733	0.153643	0.598296	0.0762382	0.647374	0.0307178	0.730969	0.0946514	0.401318	0.0937416	0.771965	0.117396	0.651426	0.0493733	0.906766	0.0609155	0.47164	0.28845	0.212087	0.271874	0.465878	0.0532749	0.486613	0.116906	0.423946	0.183125	0.27766	0.150523	0.277337	0.114428	0.722699	0.0213959	0.546858	0.0427749
13.974	0.0813385	0.447243	0.0412164	0.598947	0.28434	0.517691	0.132525	0.37391	0.112087	0.521166	0.1131	0.385149	0.281358	0.332992	0.568024	0.442194	0.165612	0.628219	0.140245	0.711322	0.0467448	0.746246	0.0497433	0.436096	0.070936	0.700947	0.108138	0.620219	0.0421713	0.92972	0.088849	0.439402	0.366164	0.268433	0.337924	0.385971	0.126149	0.446854	0.131757	0.361031	0.163826	0.237427	0.156137	0.305098	0.122255	0.791056	0.0594748	0.585756	0.0279284
14.111	0.0848992	0.478553	0.0566211	0.624814	0.408621	0.499565	0.142945	0.40305	0.12738	0.505964	0.149046	0.398128	0.249948	0.33585	0.55592	0.460397	0.26099	0.458223	0.114106	0.690569	0.0445186	0.807389	0.0642097	0.425442	0.0783792	0.695021	0.0539815	0.660789	0.0430845	0.938891	0.124418	0.447475	0.300472	0.308359	0.30556	0.311435	0.144511	0.490173	0.145413	0.520113	0.0795953	0.183367	0.187791	0.234776	0.20506	0.817769	0.0475253	0.628414	0.0843375
14.248	0.0976696	0.463585	0.0804946	0.625076	0.536533	0.494063	0.162837	0.334618	0.196401	0.4456	0.149391	0.428266	0.264507	0.391878	0.642652	0.448955	0.287234	0.48664	0.0918205	0.681656	0.0669259	0.818725	0.0508014	0.473126	0.0661682	0.670205	0.122451	0.690013	0.0548998	0.92533	0.105504	0.449934	0.231222	0.306633	0.377982	0.304459	0.176903	0.459735	0.101465	0.449832	0.11111	0.226286	0.175045	0.252367	0.279929	0.793552	0.0276844	0.67063	0.111241
14.385	0.0914622	0.497185	0.0999649	0.624618	0.645142	0.477322	0.110626	0.313093	0.269126	0.456004	0.153278	0.399389	0.300596	0.377111	0.472846	0.520786	0.281832	0.417383	0.107571	0.629632	0.0641067	0.78476	0.0873026	0.501046	0.044796	0.641913	0.121965	0.742952	0.0529544	0.954229	0.122366	0.514609	0.148777	0.248799	0.305257	0.294568	0.168985	0.398409	0.0957022	0.523915	0.139455	0.154392	0.180249	0.203254	0.187212	0.706047	0.0252359	0.669671	0.082578
14.522	0.0624875	0.541362	0.118361	0.593998	0.756854	0.457332	0.0998289	0.400011	0.20326	0.464717	0.233646	0.472022	0.388491	0.412943	0.731494	0.338342	0.256278	0.316907	0.129521	0.541881	0.0661841	0.77306	0.083664	0.497736	0.0750932	0.64	0.0861711	0.8057	0.0429892	0.987024	0.13221	0.454628	0.132244	0.275795	0.427837	0.283853	0.18358	0.34509	0.0732966	0.562336	0.158193	0.162039	0.178894	0.167912	0.135858	0.691116	0.0157622	0.608836	0.0618636
14.659	0.0491776	0.517836	0.156579	0.571284	0.841649	0.444408	0.0895646	0.387924	0.194953	0.453961	0.216467	0.46165	0.469287	0.340596	0.750717	0.332336	0.309065	0.297669	0.129856	0.425789	0.0761262	0.741573	0.081487	0.507027	0.103551	0.598502	0.0851664	0.826002	0.0611965	1.05469	0.113987	0.457102	0.180418	0.328247	0.402129	0.312915	0.321624	0.298907	0.100084	0.59254	0.25562	0.150348	0.178145	0.258719	0.185336	0.736374	0.0180539	0.535095	0.0804684
14.796	0.0691139	0.489682	0.217394	0.583674	0.858378	0.40079	0.132421	0.395912	0.188977	0.433619	0.143737	0.482849	0.407535	0.352523	0.831919	0.334822	0.466457	0.210078	0.299591	0.399978	0.0787973	0.691643	0.0916171	0.510971	0.0761287	0.614681	0.101568	0.791978	0.0789194	1.0194	0.0897487	0.481633	0.224804	0.303681	0.399018	0.279641	0.352738	0.247205	0.0881905	0.570977	0.314951	0.0593434	0.158959	0.277168	0.209183	0.750292	0.0290212	0.491573	0.0780086
14.933	0.0828047	0.486849	0.234318	0.567808	0.805385	0.333116	0.154253	0.392318	0.216028	0.420989	0.156191	0.396701	0.487669	0.301498	0.699159	0.338299	0.848878	0.197988	0.516409	0.361441	0.0872558	0.657191	0.101728	0.513174	0.107786	0.646298	0.118943	0.78144	0.0728212	1.00272	0.0696666	0.461737	0.306957	0.271589	0.411157	0.26843	0.3886	0.27948	0.0965009	0.604014	0.332344	0.096886	0.147961	0.198009	0.143114	0.755309	0.0662476	0.47941	0.0794539
15.07	0.0909163	0.457347	0.254964	0.506984	0.774203	0.292964	0.0465819	0.317725	0.213954	0.509465	0.187863	0.467082	0.383204	0.213712	0.628823	0.306453	1.17381	0.194974	0.596334	0.342013	0.0951213	0.624444	0.109861	0.510331	0.0844162	0.60325	0.142138	0.784503	0.0697959	1.08412	0.104002	0.531596	0.305674	0.291131	0.409366	0.322609	0.360305	0.26839	0.0649287	0.491375	0.386496	0.12119	0.130208	0.218686	0.0941138	0.721302	0.0937205	0.460762	0.0478864
15.207	0.119923	0.408779	0.328786	0.465546	0.685594	0.301683	0.0987329	0.364169	0.223446	0.522443	0.147334	0.486399	0.320075	0.282873	0.567775	0.259079	1.48833	0.169901	0.562823	0.334625	0.0583194	0.607543	0.112659	0.505076	0.0527786	0.554032	0.105858	0.730668	0.1118	1.07317	0.0533392	0.501232	0.205855	0.334607	0.354365	0.320568	0.415676	0.289029	0.0297446	0.421647	0.485704	0.0448153	0.129192	0.170106	0.104679	0.669571	0.0691258	0.42528	0
15.344	0.140234	0.388286	0.413832	0.480807	0.617345	0.314408	0.125897	0.401287	0.126207	0.490337	0.140565	0.396868	0.452128	0.273437	0.532631	0.159058	1.44872	0.138296	0.508702	0.312105	0.0789462	0.601124	0.113353	0.497547	0.0786832	0.574747	0.091043	0.733536	0.196778	1.08631	0.0919792	0.476206	0.207295	0.335686	0.292138	0.200024	0.384952	0.303006	0.124468	0.430263	0.571737	0.0210658	0.139285	0.163389	0.126772	0.670948	0.0622098	0.44241	0.00263595
15.481	0.104867	0.443294	0.437929	0.516536	0.58775	0.318937	0.081048	0.328733	0.229331	0.496025	0.0893119	0.273024	0.564942	0.143872	0.426587	0.24074	1.46394	0.125777	0.418053	0.292597	0.137859	0.607096	0.0939654	0.498559	0.114463	0.578045	0.0788672	0.746295	0.239831	1.08198	0.157281	0.455548	0.191386	0.402964	0.265056	0.220991	0.329503	0.327991	0.187857	0.336746	0.576075	0.0347444	0.141816	0.217841	0.116621	0.689801	0.122326	0.477162	0.00676604
15.618	0.115956	0.467035	0.427812	0.52646	0.513212	0.304648	0.100332	0.255637	0.294446	0.412212	0.0929644	0.464066	0.811307	0.127724	0.516561	0.208797	1.38211	0.201849	0.384207	0.258155	0.179854	0.616197	0.0845543	0.508736	0.124596	0.551379	0.081044	0.681991	0.340984	1.04192	0.17743	0.465289	0.227864	0.400479	0.247588	0.281161	0.370013	0.404576	0.231373	0.393804	0.471066	0.0531886	0.190522	0.220654	0.159347	0.640938	0.156769	0.518945	0.0150154
15.755	0.144365	0.45085	0.431614	0.498155	0.39909	0.269061	0.173553	0.308498	0.327249	0.447642	0.1237	0.368582	0.841047	0.087168	0.493758	0.206761	1.18466	0.172739	0.462791	0.244908	0.21161	0.569516	0.0974141	0.464974	0.0557243	0.570833	0.0774081	0.633117	0.324849	1.02811	0.156181	0.459511	0.187857	0.424918	0.209973	0.327129	0.339641	0.391962	0.249944	0.401249	0.378561	0.0542207	0.225793	0.211761	0.19217	0.606647	0.142078	0.531042	0.0131467
15.892	0.1413	0.43227	0.478916	0.480525	0.359794	0.235807	0.267042	0.280149	0.18082	0.346657	0.222608	0.277512	0.815151	0.0851056	0.40922	0.213833	1.00241	0.12305	0.324222	0.187826	0.184751	0.54128	0.146406	0.473023	0.0902778	0.552841	0.0827903	0.674021	0.301147	0.984833	0.116411	0.396577	0.216456	0.360086	0.176717	0.31755	0.291753	0.358735	0.353719	0.328939	0.288892	0.0652852	0.274116	0.25104	0.159933	0.589789	0.13476	0.528139	0.0289085
16.029	0.147171	0.380183	0.537583	0.490837	0.338532	0.244101	0.337478	0.294756	0.301786	0.380547	0.253301	0.455236	0.809155	0.0928972	0.583744	0.231916	0.645299	0	0.349188	0.19726	0.118864	0.541241	0.214627	0.475031	0.0673189	0.573856	0.118273	0.673186	0.386974	0.97235	0.133682	0.421816	0.131788	0.297117	0.188636	0.240839	0.326608	0.371735	0.30249	0.303764	0.215566	0	0.302201	0.235124	0.176924	0.553159	0.0948664	0.546466	0.0503469
16.166	0.171817	0.339175	0.563118	0.482445	0.313562	0.247602	0.439914	0.225249	0.24032	0.285441	0.158482	0.350783	0.722824	0.0757564	0.540052	0.258598	0.668371	0.0836678	0.227374	0.18618	0.148394	0.538313	0.334083	0.451532	0.150407	0.678754	0.221962	0.619919	0.438928	0.937783	0.146092	0.498645	0.0910177	0.232918	0.226615	0.287659	0.448869	0.463795	0.312505	0.270654	0.283176	0.0308216	0.201628	0.206358	0.173908	0.488835	0.0481937	0.544127	0.0512817
16.303	0.189849	0.300978	0.557958	0.429923	0.357031	0.225052	0.648606	0.186177	0.210937	0.321104	0.0964876	0.382922	0.768339	0.0192968	0.584147	0.317545	0.506698	0.0628473	0.247146	0.170204	0.226598	0.551479	0.541456	0.431086	0.175164	0.64308	0.420227	0.607458	0.433267	0.89912	0.113742	0.38886	0.0976344	0.224087	0.298987	0.313325	0.669856	0.533017	0.230567	0.289622	0.252012	0.0743481	0.191314	0.212436	0.173019	0.45418	0.026559	0.534866	0.0723571
16.44	0.209366	0.30202	0.513385	0.371349	0.461142	0.215538	0.951722	0.26147	0.301882	0.391502	0.0836144	0.335056	0.69263	0.053468	0.604153	0.280104	0.422321	0.0581293	0.209111	0.214841	0.255535	0.550504	0.510369	0.410244	0.161786	0.598907	0.564741	0.554035	0.353355	0.890961	0.140396	0.399372	0.106268	0.232796	0.293985	0.357961	0.705561	0.512382	0.458703	0.279049	0.270827	0.12583	0.179626	0.207534	0.214741	0.461697	0.0364897	0.529924	0.0924783
16.577	0.24658	0.318844	0.442062	0.34576	0.55654	0.222906	1.14167	0.218303	0.210973	0.397411	0.207247	0.312918	0.606072	0	0.720724	0.260362	0.431751	0.121577	0.19135	0.206652	0.266665	0.554971	0.376203	0.417952	0.255441	0.526684	0.606634	0.529287	0.224141	0.889982	0.0909903	0.355271	0.156939	0.231303	0.258473	0.352282	0.619897	0.460203	0.371289	0.209959	0.325512	0.12302	0.151596	0.186773	0.326047	0.417972	0.0348118	0.551174	0.0773306
16.714	0.306731	0.334745	0.380902	0.324499	0.601962	0.210162	1.19521	0.188888	0.133192	0.374501	0.249833	0.353738	0.465684	0.0476051	0.738779	0.319034	0.508616	0.120479	0.205089	0.161532	0.300944	0.551356	0.259633	0.42676	0.232187	0.489511	0.678357	0.511222	0.142307	0.88498	0.0851018	0.415118	0.206884	0.232193	0.219359	0.359726	0.416437	0.392064	0.416417	0.281723	0.406453	0.138216	0.16497	0.189086	0.337636	0.42505	0.0268319	0.572649	0.0715187
16.851	0.399184	0.341789	0.362486	0.320415	0.595533	0.181806	1.079	0.114525	0.147325	0.376759	0.26456	0.264808	0.458632	0.0392854	1.03637	0.306655	0.574564	0.118075	0.14879	0.14102	0.282246	0.499677	0.181903	0.436459	0.173252	0.473217	0.688906	0.480223	0.136662	0.864518	0.0934885	0.413852	0.381332	0.290927	0.258823	0.296922	0.359862	0.446413	0.42231	0.321647	0.397725	0.150014	0.128194	0.206536	0.260403	0.429895	0.0242742	0.593174	0.0548531
16.988	0.531375	0.325569	0.382929	0.321514	0.539797	0.173726	0.729647	0.123504	0.153306	0.374933	0.230037	0.271953	0.396593	0.0418057	0.924139	0.220467	0.613703	0.147824	0.152979	0.169882	0.212797	0.44609	0.119007	0.468933	0.243101	0.409706	0.706384	0.464992	0.189854	0.839831	0.122522	0.3875	0.381427	0.349967	0.187845	0.234176	0.374282	0.479873	0.402998	0.30266	0.513444	0.132223	0.162595	0.193549	0.240908	0.428753	0.0102649	0.60161	0.0399757
17.125	0.64888	0.338816	0.426799	0.314641	0.424004	0.170948	0.790552	0.159342	0.259117	0.314906	0.273541	0.259698	0.466673	0.0470202	0.880999	0.250107	0.56255	0.170906	0.138736	0.250207	0.173325	0.391121	0.160287	0.409578	0.230958	0.443638	0.485236	0.364325	0.239617	0.835359	0.128701	0.43396	0.358876	0.343461	0.201366	0.271626	0.374549	0.475876	0.402451	0.277762	0.449408	0.201971	0.168358	0.29859	0.241028	0.417263	0	0.548927	0.0654479
17.262	0.652307	0.348872	0.426029	0.341704	0.352921	0.159425	0.71942	0.173542	0.312095	0.31453	0.339471	0.285918	0.432101	0.0249491	0.657874	0.262944	0.471612	0.133901	0.0958419	0.212071	0.170505	0.371458	0.145169	0.388659	0.269541	0.40451	0.454083	0.355531	0.221759	0.833689	0.125207	0.435049	0.3106	0.261091	0.24724	0.268582	0.36371	0.456551	0.38532	0.246221	0.508941	0.187229	0.186387	0.303802	0.222513	0.408323	0.0152779	0.541708	0.0497911
17.399	0.63258	0.316542	0.36749	0.390163	0.301718	0.116082	0.587228	0.203518	0.259983	0.31485	0.413342	0.284874	0.577215	0.0585421	0.668526	0.163962	0.467179	0.0914949	0.0477534	0.184453	0.173622	0.365039	0.138718	0.431492	0.396946	0.405531	0.300718	0.303261	0.254259	0.783329	0.151965	0.476498	0.210598	0.231989	0.307156	0.27131	0.280529	0.400773	0.37162	0.242909	0.504693	0.140476	0.129183	0.294298	0.230704	0.410924	0.029335	0.607131	0.0585259
17.536	0.692129	0.270355	0.363573	0.408789	0.259729	0.0678811	0.319556	0.176688	0.276346	0.303087	0.481995	0.2265	0.522509	0.112622	0.793917	0.26667	0.507996	0.108794	0.106566	0.222549	0.163085	0.360245	0.160896	0.451939	0.389641	0.416434	0.237535	0.372994	0.293834	0.775714	0.217877	0.579704	0.225775	0.194932	0.244655	0.26975	0.285614	0.419561	0.256024	0.221341	0.41627	0.171373	0.160128	0.341524	0.223578	0.415801	0.0660429	0.649018	0.0760493
17.673	0.853467	0.233152	0.37086	0.416365	0.25717	0.0353771	0.304619	0.304591	0.286168	0.230781	0.61093	0.189332	0.522375	0.0649064	0.808511	0.306922	0.473119	0.183887	0.0650115	0.281438	0.183861	0.39242	0.203612	0.404674	0.264678	0.422205	0.241793	0.450278	0.294262	0.704414	0.208308	0.6233	0.232555	0.276607	0.24268	0.241111	0.250808	0.497878	0.281163	0.26243	0.41012	0.19906	0.121077	0.282899	0.224598	0.450625	0.0875753	0.642171	0.0741
17.81	1.03761	0.175329	0.390945	0.402333	0.30293	0.0660409	0.441972	0.155967	0.277368	0.197419	0.7235	0.199524	0.512235	0.0200555	0.846542	0.249115	0.425107	0.135747	0.0405489	0.311022	0.258651	0.420983	0.178723	0.401149	0.210092	0.432395	0.188098	0.547186	0.357126	0.618543	0.192583	0.64143	0.242319	0.249922	0.126789	0.218098	0.336353	0.556629	0.245663	0.268746	0.456949	0.18257	0.0800538	0.201626	0.212397	0.410741	0.0538547	0.603503	0.0680005
17.947	1.16061	0.138017	0.392356	0.381775	0.366978	0.0975386	0.383556	0.278143	0.436018	0.210447	0.703279	0.138322	0.534862	0.0753653	0.960611	0.217873	0.379806	0.16661	0.0323386	0.291352	0.384638	0.444099	0.162542	0.371938	0.176321	0.450292	0.226005	0.580843	0.294374	0.611187	0.167572	0.671952	0.26609	0.272207	0.203417	0.346381	0.197149	0.636608	0.248929	0.214944	0.51203	0.121896			0.151682	0.38618	0.0489371	0.570564	0.048796
18.084	1.00719	0.137229	0.377951	0.3635	0.41995	0.0643728	0.341729	0.259114	0.352226	0.278036	0.609212	0.0854457	0.552422	0.0773709	0.823288	0.214977	0.411757	0.202841	0.0866267	0.299501	0.441621	0.442149	0.161488	0.283529	0.110863	0.436263	0.258808	0.610142	0.335798	0.562395	0.21158	0.673243	0.282072	0.221029	0.141354	0.288774	0.160308	0.605911	0.25134	0.214067	0.514221	0.182263			0.117041	0.401262	0.0498579	0.495706	0.0482704
18.221	0.863768	0.158965	0.386076	0.338115	0.470237	0.0410393	0.208826	0.154233	0.32547	0.190685	0.56657	0.0550106	0.643606	0.0767993	0.670203	0.156464	0.394892	0.237974	0.101706	0.340768	0.450525	0.40855	0.165335	0.206448	0.115144	0.46911	0.247868	0.618827	0.531489	0.484875	0.163951	0.620476	0.264295	0.152949	0.159266	0.26211	0.122825	0.565292	0.259197	0.231533	0.512434	0.15992			0.122332	0.448358	0.0669569	0.483021	0.0851593
18.358	0.865622	0.135582	0.434059	0.306228	0.417849	0.0418465	0.200295	0.272871	0.412676	0.139244	0.646711	0.185556	0.702109	0.0530836	0.515174	0.22294	0.505944	0.239095	0.0792538	0.312186	0.495339	0.438736	0.156663	0.1615	0.139063	0.462144	0.295152	0.638699	0.79665	0.388857	0.188196	0.510156	0.396156	0.114147	0.100591	0.252745	0.129432	0.622298	0.236626	0.270715	0.505156	0.189422			0.146621	0.471274	0.0965238	0.525241	0.0969125
18.495	0.829164	0.112209	0.449828	0.276617	0.389248	0.0406452	0.27407	0.325662	0.551357	0.147269	0.493051	0.173657	0.567389	0.051887	0.302571	0.157379	0.473499	0.19298	0.0745625	0.291433	0.568053	0.439956	0.148262	0.131094	0.165614	0.432062	0.373836	0.648196	1.21861	0.46971	0.247045	0.498116	0.530346	0.159387	0.101424	0.208154	0.067682	0.564482	0.252289	0.208303	0.461307	0.221419			0.168559	0.502818	0.104572	0.603595	0.074087
18.632	0.778964	0.114486	0.463268	0.208094	0.433874	0.0457489	0.235131	0.318842	0.517543	0.189582	0.473778	0.144665	0.429313	0.0326939	0.301285	0.148	0.454449	0.19541	0.140412	0.317045	0.588828	0.436624	0.146849	0.121313	0.174122	0.424268	0.494062	0.666608	1.4713	0.448419	0.252755	0.522627	0.534849	0.138415	0.11555	0.243911	0.0744024	0.573603	0.245799	0.170991	0.460012	0.212097			0.122762	0.493679	0.0600136	0.597385	0.0689518
18.769	0.698781	0.103698	0.513777	0.120885	0.367916	0.0223694	0.255586	0.394991	0.656663	0.0649795	0.38215	0.0384257	0.495778	0.0545845	0.298327	0.0949965	0.424556	0.311177	0.1193	0.310339	0.485249	0.455435	0.139415	0.112225	0.144531	0.404563	0.712787	0.637519	1.46005	0.442491	0.265038	0.33911	0.518578	0.103187	0.110079	0.243746	0.112693	0.628666	0.276026	0.129853	0.426878	0.209297			0.117636	0.515044	0.0384608	0.667124	0.0819021
18.906	0.630556	0.0971448	0.604098	0.0848166	0.26723	0	0.397931	0.526124	0.762811	0.153153	0.356225	0.173893	0.560845	0.0184177	0.392083	0.086556	0.42424	0.311418	0.0879674	0.334867	0.321867	0.444342	0.168451	0.127563	0.141052	0.391162	0.916984	0.580243	1.15089	0.393821	0.394854	0.296379	0.589451	0.169307	0.135738	0.23808	0.0924204	0.668403	0.266377	0.123788	0.3611	0.151303			0.101364	0.491622	0.0695282	0.694274	0.0694558
19.043	0.617703	0.113181	0.668101	0.0947402	0.277241	0.033097	0.158912	0.360832	0.908723	0.156464	0.322022	0.069759	0.587382	0.0956248	0.442485	0.13469	0.450845	0.288622	0.0847834	0.33852	0.169318	0.419846	0.174324	0.0948161	0.181302	0.366285	1.02932	0.536758	0.892188	0.319809	0.301938	0.20886	0.551735	0.161619			0.160841	0.625937	0.23664	0.116785	0.207465	0.153645			0.111475	0.439933	0.0483505	0.615758	0.0882713
19.18	0.604266	0.130438	0.6945	0.0932864	0.33806	0.0329592	0.237308	0.574133	1.02641	0.117548	0.421577	0.134987	0.513732	0.0926131	0.480285	0.125447	0.36372	0.310788	0.128683	0.385165	0.105211	0.415458	0.188792	0.0830273	0.196493	0.341751	1.00188	0.500039	0.818621	0.262451	0.245127	0.187782	0.416797	0.186632			0.148785	0.620938	0.271234	0.112357	0.196942	0.145075			0.121228	0.395911	0.0533295	0.517243	0.0994327
19.317	0.626335	0.12413	0.682046	0.0683221	0.366365	0.0158503	0.254616	0.503084	1.02927	0.0838802	0.296374	0.0687896	0.470129	0.124919	0.334254	0.218009	0.378749	0.317662	0.101706	0.397891	0.079688	0.411558	0.169791	0.0837903	0.193458	0.330746	0.830032	0.519337	0.900716	0.243552	0.335322	0.136246	0.37802	0.186287			0.168064	0.632285	0.250584	0.101901	0.23262	0.144219			0.108364	0.376959	0.0864021	0.475861	0.14919
19.454	0.710637	0.121284	0.595643	0.0708214	0.397969	0.038652	0.255475	0.438668	0.994198	0.0863578	0.297513	0.113512			0.281185	0.108946	0.474753	0.309453	0.102041	0.376174	0.0789462	0.403999	0.124522	0.0763429	0.273933	0.360745	0.720761	0.550115	0.829166	0.195869	0.401471	0.173015	0.325675	0.260527			0.168762	0.655278	0.186821	0.138372	0.281156	0.146979			0.168422	0.380505	0.088155	0.506948	0.219218
19.591	0.782144	0.131327	0.501756	0.0989751	0.450349	0.0445246	0.185572	0.332496	0.925609	0.0989255	0.279343	0.169061			0.32349	0.0502083	0.469345	0.322749	0.0805946	0.411259	0.129251	0.455435	0.0916238	0.0997316	0.323558	0.382607	0.559303	0.589149	0.73728	0.173962	0.495577	0.150567	0.277765	0.257945			0.163426	0.705317	0.193031	0.0744753	0.220127	0.146759			0.196371	0.341651	0.122189	0.562717	0.261709
19.728	0.784937	0.123211	0.457743	0.106428	0.461495	0.0447695	0.179218	0.426762	0.737533	0.0614917	0.202122	0.161037			0.410488	0	0.478357	0.276509	0.0261382	0.427836	0.12198	0.455557	0.149596	0.128842	0.352782	0.320507	0.582243	0.549772	0.741837	0.177549	0.615795	0.154475	0.268019	0.302505			0.148128	0.708827	0.249829	0.106095	0.258114	0.102992			0.243673	0.319099	0.14055	0.575497	0.276936
19.865	0.764125	0.108597	0.427522	0.11422	0.386809	0.0405802	0.149255	0.420401	0.672052	0.159545	0.166582	0.16895			0.643577	0.000457497	0.453277	0.329999	0.0621633	0.39223	0.115896	0.430327	0.196012	0.115675	0.425791	0.327348	0.492978	0.618762	0.743981	0.192274	0.598367	0.176221	0.225624	0.275985			0.190857	0.74259	0.243893	0.120066	0.237687	0.133308			0.295109	0.315334	0.113036	0.658304	0.224349
20.002	0.775556	0.109832	0.37658	0.1298	0.310199	0.00195116	0.256682	0.433933	0.696987	0.125874	0.205214	0.105515			0.98524	0.00782009	0.446304	0.286713	0.0184313	0.440482	0.0857722	0.426061	0.211643	0.140029	0.465827	0.388936	0.419413	0.535755	0.708043	0.177386	0.779411	0.288484	0.250996	0.260011			0.188024	0.671843	0.267673	0.071826	0.198158	0.176652			0.327281	0.324908	0.108535	0.677611	0.171542
20.139	0.805114	0.109924	0.311538	0.137959	0.323403	0.00847796	0.0978812	0.461104	0.59221	0.0282248	0.233849	0.0886358			1.35485	0.0441601	0.337957	0.363045	0.064174	0.425067	0.0730101	0.423623	0.171069	0.128401	0.452843	0.432928	0.234959	0.550397	0.604461	0.178978	0.669788	0.158763	0.237242	0.195263			0.195107	0.609799	0.278904	0.128645	0.199516	0.140578			0.319348	0.315772	0.0969671	0.663996	0.158784
20.276	0.81056	0.108444	0.309505	0.141961	0.298094	0.0170707	0.174123	0.452162	0.514556	0.016409	0.294421	0.149559			1.86945	0.0101347	0.318172	0.345865			0.104025	0.433618	0.178731	0.0998519	0.42071	0.503517	0.16806	0.596725	0.357976	0.161184	0.664033	0.176953	0.280342	0.262277			0.193318	0.556145	0.215947	0.127057	0.238033	0.139013			0.271153	0.260109	0.150453	0.600204	0.139036
20.413	0.811398	0.12188	0.326564	0.154695	0.233673	0.0378868	0.234591	0.447712	0.536383	0.00319594	0.260514	0.133832			1.339	0.015613	0.310021	0.292948			0.0998699	0.427564	0.237382	0.127745	0.331209	0.562925	0.272722	0.627643	0.239768	0.162003	0.586151	0.125407	0.276018	0.346355			0.170951	0.643431	0.192066	0.122592	0.231671	0.156405			0.27048	0.220647	0.242674	0.553981	0.111691
20.55	0.826238	0.128144	0.293087	0.162201	0.197197	0.0706318	0.0410869	0.419882	0.538938	0.0459133	0.222294	0.0928354			0.875954	0.0831636	0.357596	0.328681			0.0845846	0.407047	0.235732	0.121508	0.200652	0.57563	0.23641	0.627388	0.153368	0.163815	0.599192	0.0756914	0.269238	0.318152			0.214902	0.63186	0.227848	0.134392	0.257077	0.144221			0.252565	0.250915	0.258449	0.560732	0.122669
20.687	0.816336	0.114451	0.249271	0.147617	0.213771	0.0935713	0.224637	0.571235	0.538409	0.0728754	0.207376	0.126538			0.541107	0.0661238	0.544393	0.404812			0.0952693	0.400831	0.251245	0.106704	0.114845	0.579767	0.211198	0.557377	0.102995	0.140615	0.535934	0.103225	0.332195	0.331154			0.172774	0.677204	0.271875	0.105243	0.24378	0.152958			0.254334	0.280728	0.31096	0.60899	0.100607
20.824	0.795308	0.119533	0.24898	0.138335	0.226398	0.0824918	0.112752	0.470645	0.503254	0.0671821	0.182898	0.185662			0.287978	0.0252748	0.449294	0.420479			0.129103	0.413181	0.254396	0.103944	0.0771143	0.567467	0.183162	0.478414	0.12649	0.142026	0.507904	0.0754886	0.347874	0.297628			0.160974	0.647728	0.30254	0.141469	0.261564	0.180166			0.338397	0.247916	0.23704	0.621204	0.103762
20.961	0.835485	0.138012	0.262872	0.124568	0.231622	0.0615532	0.0616895	0.508464	0.314776	0.113317	0.20376	0.209274			0.291979	0.0361073	0.316209	0.394024			0.139788	0.378526	0.287163	0.092295	0.093022	0.567089	0.231411	0.396067	0.164239	0.169224	0.432371	0.0733565	0.328645	0.311909			0.0987906	0.716354	0.371217	0.123206	0.278318	0.214477			0.369092	0.248959	0.271886	0.640953	0.155992
21.098	0.92915	0.146724	0.288103	0.0949526	0.263092	0.0662857	0.0836919	0.345411	0.401874	0.12889	0.204795	0.221715			0.313401	0.0286866	0.313321	0.39408			0.108773	0.381126	0.315744	0.0824341	0.134809	0.577258	0.210823	0.365118	0.15317	0.155056	0.279417	0.120767	0.282242	0.327172			0.0864365	0.733756	0.472338	0.102422	0.257199	0.198501			0.42239	0.289314	0.27947	0.546166	0.188595
21.235	1.03312	0.154902	0.31898	0.0987669	0.226553	0.0778511	0.141419	0.517443	0.462287	0.161669	0.231767	0.166521			0.337662	0.0119104	0.210464	0.304814			0.122722	0.350859	0.28441	0.0663573	0.147963	0.527259	0.186926	0.288733	0.103241	0.124151	0.295715	0.113065	0.281853	0.30462			0.138167	0.616424	0.44496	0.122733	0.188261	0.183673			0.445365	0.277863	0.230015	0.552054	0.153332
21.372	1.08562	0.16104	0.349452	0.125263	0.190014	0.0967964	0.140775	0.510156	0.29798	0.148057	0.245121	0.244686			0.20648	0.0850207	0.260097	0.334928			0.152252	0.350373	0.298012	0.0561869	0.127446	0.445039	0.225439	0.234898	0.0910602	0.136386	0.319031	0.13029	0.230701	0.358764			0.109925	0.582016	0.454789	0.124622	0.14343	0.229851			0.434856	0.289135	0.195864	0.537555	0.174406
21.509	1.04733	0.154425	0.385589	0.143762	0.166242	0.1098	0.0875725	0.587539	0.281822	0.198875	0.209464	0.269645			0.174471	0.038515	0.225556	0.320273			0.120348	0.320673	0.306633	0.0558817	0.111918	0.368959	0.228708	0.224602	0.128054	0.146149	0.312057	0.138887	0.233824	0.27933			0.0970091	0.627863	0.482015	0.111094	0.116531	0.25849			0.420994	0.254156	0.252345	0.488592	0.211686
21.646	0.930191	0.141536	0.404708	0.133786	0.198579	0.0844736	0.154313	0.370269	0.295209	0.178959	0.204845	0.237197			0.228317	0.0657089	0.20199	0.306162			0.0807267	0.315391	0.251305	0.0560235	0.0878385	0.364406	0.243371	0.23188	0.127332	0.146589	0.243721	0.196063	0.206168	0.223728			0.185593	0.554071	0.528985	0.121899	0.144565	0.282636			0.416216	0.27574	0.234428	0.495339	0.203842
21.783	0.751475	0.118583	0.406633	0.109597	0.210493	0.0786086	0.282868	0.453873	0.256424	0.294784	0.215636	0.235193			0.204305	0.0997381	0.1704	0.346488			0.0939338	0.34111	0.260282	0.0476886	0.0735946	0.456602	0.298924	0.2256	0.108021	0.109624	0.205022	0.151111	0.234876	0.195088			0.196209	0.557498	0.51004	0.103207	0.185392	0.317693			0.407054	0.315569	0.249712	0.486665	0.204096
21.92	0.590702	0.0925262	0.416615	0.0977214	0.153806	0.105447	0.214395	0.481451	0.27628	0.265258	0.250837	0.190954			0.19878	0.0988193	0.194941	0.402266			0.0854753	0.407047	0.258009	0.0434544	0.114234	0.590579	0.307232	0.215313	0.105623	0.125682	0.265722	0.230591	0.210758	0.180573					0.448846	0.0820185	0.176604	0.292327			0.380583	0.271616	0.303117	0.446471	0.16688
22.057	0.527923	0.0930428	0.414535	0.0951119	0.145621	0.11754			0.353783	0.325386	0.246667	0.174385			0.31023	0.184534	0.262028	0.36716			0.0749394	0.394007	0.303138	0.012827	0.127334	0.640987	0.314552	0.198322	0.136892	0.135537	0.249275	0.236631	0.255753	0.211333					0.526654	0.0936522	0.130142	0.295869			0.294376	0.282593	0.366097	0.384618	0.179821
22.194	0.504635	0.101711	0.330535	0.0752278	0.171021	0.150281			0.203483	0.257149	0.294532	0.185135			0.415669	0.142421	0.263422	0.369722			0.0814685	0.43374	0.336922	0	0.145137	0.692336	0.401178	0.190484	0.188084	0.120483	0.25729	0.234955	0.292067	0.199012					0.475503	0.0937074	0.140368	0.322551			0.307183	0.299902	0.398113	0.325164	0.189546
22.331	0.49123	0.0913223	0.250047	0.0616042	0.169273	0.177444			0.275468	0.25152	0.344695	0.187594			0.309252	0.201004	0.249121	0.425207			0.0881465	0.466689	0.251061	0.0358309	0.176781	0.715855	0.516771	0.212127	0.182311	0.0905196	0.222398	0.239204	0.355043	0.275119					0.566385	0.150551	0.16536	0.211505			0.405128	0.317025	0.389089	0.269145	0.157194
22.468	0.470018	0.0958271	0.179642	0.0513416	0.156978	0.184694			0.321911	0.321171	0.209945	0.0399897			0.295814	0.20749	0.148551	0.436486			0.118715	0.45068	0.212476	0.00185054	0.20737	0.714299	0.368645	0.212526	0.18027	0.0934249	0.277343	0.255964	0.307788	0.267971					0.666296	0.132846	0.118922	0.208312			0.509397	0.339773	0.350362	0.265613	0.123133
22.605	0.441195	0.107008	0.174618	0.0555806	0.14677	0.20569			0.242352	0.274871	0.280458	0.165639			0.32637	0.185356	0.197962	0.337154			0.134	0.413994	0.223201	0.0186365	0.266782	0.708403	0.244384	0.194503	0.212723	0.100405	0.342957	0.232882	0.280014	0.324152					0.589417	0.128425	0.095044	0.220571			0.572818	0.291388	0.402805	0.294047	0.136956
22.742	0.406527	0.0887306	0.208966	0.0451669	0.132847	0.231885			0.292865	0.260384	0.364737	0.0960595			0.275275	0.251061	0.14154	0.559909			0.0952693	0.42338	0.228787	0.0415244	0.285956	0.624636	0.20694	0.230056	0.216788	0.100987	0.326957	0.219303	0.310891	0.362172					0.550987	0.155605	0.0944413	0.180221			0.517259	0.325899	0.42399	0.294164	0.194442
22.879	0.365893	0.0531867	0.214051	0.0416262	0.11095	0.227849			0.307148	0.308879	0.515459	0.153836			0.365777	0.162419					0.0940818	0.428863	0.196091	0.043304	0.298716	0.505962	0.114645	0.321183	0.220012	0.136154	0.396691	0.219515							0.513767	0.116656	0.153056	0.219188			0.531531	0.335956	0.45014	0.273865	0.195278
23.016	0.32291	0.0587334	0.18982	0.0338711	0.12677	0.196126			0.341226	0.339898	0.584753	0.183175			0.425941	0.127653					0.09616	0.471036	0.156556	0.0890216	0.210027	0.387571	0.178179	0.278858	0.199859	0.147636	0.44087	0.274217							0.559557	0.146964	0.134421	0.279812			0.507332	0.376171	0.412429	0.26992	0.193079
23.153	0.32423	0.0723267	0.20983	0.0323642	0.1418	0.180436			0.375881	0.323741	0.537886	0.186956			0.408591	0.0812057					0.138155	0.452834	0.174528	0.128719	0.20665	0.231464	0.200784	0.266199	0.175522	0.163762	0.265774	0.182632							0.644495	0.131307	0.210567	0.277084			0.46918	0.369423	0.41249	0.236544	0.204963
23.29	0.320149	0.0652608	0.228544	0.061057	0.12003	0.189147			0.376314	0.315217	0.556789	0.124045			0.288719	0.0627042					0.161749	0.364184	0.165537	0.14503	0.195695	0.101549	0.167462	0.34332	0.167232	0.198416	0.198836	0.224927							0.762473	0.160676	0.270798	0.287634			0.371785	0.347525	0.398304	0.270783	0.196673
23.427	0.360314	0.0607735	0.231286	0.0647447	0.104986	0.193998			0.321442	0.224131	0.475835	0.0604986									0.0360601	0.356832	0.19099	0.168608	0.128407	0.019688			0.105805	0.236862	0.254926								0.82646	0.141052	0.19376	0.183749			0.313988	0.316073	0.371581	0.327753	0.190459
23.564	0.380796	0.0589392	0.256558	0.0564668	0.143083	0.188646			0.338382	0.130262	0.453883	0.149141											0.186004	0.201417	0.149909	0.000422371			0.0684143	0.264322	0.20987								0.712957	0.115969	0.170986	0.195242			0.270207	0.325814	0.365006	0.293789	0.22163
23.701	0.359184	0.05443	0.230152	0.0352718	0.168899	0.181576			0.304124	0.162112	0.451259	0.159528											0.16468	0.238434	0.146693	0.019134			0.065127	0.275888	0.170776								0.823294	0.0598673	0.204385	0.195205			0.233208	0.347205	0.410472	0.3024	0.313707
23.838	0.345754	0.0531429	0.177225	0.0203006	0.16247	0.181469			0.365764	0.181389	0.300211	0.165338											0.218836	0.286901	0.12815	0.0226319			0.0647458	0.302056									0.654209	0.0843428	0.22163	0.21761			0.230169	0.392254	0.404449	0.247411	0.423914
23.975	0.327106	0.0455823	0.138966	0.0214237	0.139791	0.162482			0.336393	0.177337	0.266143	0.191196											0.234217	0.319708	0.1736	0.10454			0.0940061	0.309519									0.653388	0.102232	0.229043	0.213467			0.297053	0.41425	0.373225	0.253511	0.453102
24.112	0.280308	0.0318927	0.125594	0.0173889	0.130908	0.133237			0.304959	0.0802128	0.27011	0.202299											0.208538	0.377973	0.265262	0.141607			0.0777363	0.324728									0.628738	0.071458	0.264687	0.165687			0.224998	0.345331	0.399402	0.183669	0.43408
24.249	0.21763	0.0336745	0.144842	0.0340549					0.302086	0.134479	0.214533	0.196418											0.161115	0.426274	0.133474	0.264873													0.657777	0.0517966	0.255342	0.267401			0.250897	0.387622	0.463556	0.179387	0.472323
24.386	0.162639	0.0291522	0.193311	0.076551					0.262712	0.14373	0.189508	0.206778											0.131516	0.448175															0.650575	0.107592	0.230747	0.236686			0.253749	0.409854	0.482728	0.176922	0.445928
24.523	0.191315	0.0248575	0.241666	0.0550987					0.270923	0.073184	0.261456	0.178275											0.127964	0.437321															0.487836	0.147963	0.236431	0.18184			0.269245	0.381391	0.513332	0.218213	0.312226
24.66	0.152077	0.0340029	0.275407	0.0368686					0.271314	0.0672663	0.199486	0.153377											0.124927	0.438372															0.354086	0.168686	0.247185	0.171166			0.282152	0.402302	0.557412	0.244204	0.252427
24.797	0.150237	0	0.26171	0.0490384					0.347051	0	0.267782	0.0502349											0.0986495	0.464046															0.309311	0.140739	0.228344	0.211314			0.302924	0.33507	0.634634	0.242561	0.251079
24.934	0.158589	0.0218061	0.219319	0.0340018					0.333189	0.108202	0.338289	0.113756											0.110457	0.502258															0.317887	0.133919	0.208363	0.264015			0.305322	0.318624	0.69076	0.256005	0.189312
25.071	0.111443	0.058392	0.159017	0.0105566							0.328027	0.0381841											0.153869	0.632608															0.215285	0.0611367	0.162296	0.240218			0.270223	0.331116	0.690603	0.216983	0.168008
25.208	0.151646	0.108978	0.127749	0							0.261579	0.0174212											0.0878207	0.599971															0.375758	0.0809208	0.181869	0.281514			0.190221	0.359317	0.557883	0.245889	0.167412
25.345	0.158355	0.121398	0.1675	0.0330625							0.25845	0.03732											0.0795833	0.610879															0.341056	0.0757018					0.212323	0.380541	0.48667	0.270037	0.201065
25.482	0.13567	0.118224	0.183829	0.00552131																			0.0936304	0.581386															0.406445	0.0642583					0.205878	0.425234	0.51754	0.272051	0.204925
25.619	0.143724	0.152428	0.185842	0.0500266																			0.11877	0.56606															0.542843	0.0949891					0.263313	0.413217	0.583208	0.278994
25.756	0.174102	0.210593	0.208169	0.06637																			0.112833	0.560396															0.454861	0.117821					0.320155	0.402256	0.603389	0.321657
25.893			0.232198	0.0610897																																			0.416057	0.102029					0.311677	0.400997	0.568584	0.349779
26.03			0.187389	0.0409769																																			0.409985	0.122519					0.319331	0.345484	0.478622	0.31373
26.167																																							0.412834	0.0554395					0.296966	0.37833	0.452595	0.274369
26.304																																							0.400559	0.0570585					0.270002	0.379223	0.473861	0.241269
26.441																																							0.284847	0.0870228					0.225406	0.384531	0.466263	0.229538
26.578																																							0.305253	0.126376					0.190357	0.388679	0.457117	0.208443
26.715																																							0.366354	0.0804792					0.182642	0.38341	0.530437	0.175646
26.852																																							0.410431	0.0858944					0.188939	0.406266	0.581557	0.197801
26.989																																							0.442982	0.147509					0.239264	0.438745	0.532688	0.230752
27.126																																							0.400343	0.153949							0.566184	0.268523
27.263																																							0.349359	0.185103							0.559227	0.237691
27.4																																							0.309678	0.16565							0.593575	0.26776
27.537																																							0.330018	0.182337							0.588125	0.270733
27.674																																							0.296791	0.229393							0.47556	0.296925
27.811																																							0.275717	0.22147							0.361391	0.253165
27.948																																							0.22312	0.227786							0.311213	0.202054
28.085																																							0.206126	0.241481							0.326579	0.217421
28.222																																							0.221768	0.314122							0.374821	0.205232
28.359																																							0.283826	0.210793							0.34374	0.230952
28.496																																							0.201816	0.270047							0.366172	0.250409
28.633																																							0.19311	0.325455							0.381491	0.250359
28.77																																							0.141427	0.286586							0.378429	0.294931
28.907																																							0.189843	0.303562							0.44143	0.347318
29.044																																							0.211759	0.349532							0.495728	0.379531
29.181																																							0.286869	0.330325							0.50705	0.422565
29.318																																							0.280653	0.306867							0.602278	0.557175
29.455																																							0.279933	0.257395							0.509478	0.516197
29.592																																							0.306836	0.338702							0.547714	0.599875
29.729																																							0.302418	0.343927							0.55669	0.674208
29.866																																							0.297432	0.280515							0.452806	0.66204
30.003																																							0.276134	0.204856							0.406304	0.754563
[truncated: 47 more columns]

## Sheet: APCDDD1_MYCtag
Figure 5 - figure supplement 3. APCDD1-MYC Pixel intensity profile (Normalized Pixel Intensity measured from basal to apical side of progenitor cells )
	Cell 1		Cell 2		Cell 3		Cell 4		Cell 5		Cell 6		Cell 7		Cell 8		Cell 9		Cell 10		Cell 11		Cell 12		Cell 13		Cell 14		Cell 15		Cell 16		Cell 17		Cell 18		Cell 19		Cell 20		Cell 21		Cell 22		Cell 23		Cell 24		Cell 25
	Normalized Pixel Intensity	Normalized Pixel Intensity	Normalized Pixel Intensity	Normalized Pixel Intensity	Normalized Pixel Intensity	Normalized Pixel Intensity	Normalized Pixel Intensity	Normalized Pixel Intensity	Normalized Pixel Intensity	Normalized Pixel Intensity	Normalized Pixel Intensity	Normalized Pixel Intensity	Normalized Pixel Intensity	Normalized Pixel Intensity	Normalized Pixel Intensity	Normalized Pixel Intensity	Normalized Pixel Intensity	Normalized Pixel Intensity	Normalized Pixel Intensity	Normalized Pixel Intensity	Normalized Pixel Intensity	Normalized Pixel Intensity	Normalized Pixel Intensity	Normalized Pixel Intensity	Normalized Pixel Intensity	Normalized Pixel Intensity	Normalized Pixel Intensity	Normalized Pixel Intensity	Normalized Pixel Intensity	Normalized Pixel Intensity	Normalized Pixel Intensity	Normalized Pixel Intensity	Normalized Pixel Intensity	Normalized Pixel Intensity	Normalized Pixel Intensity	Normalized Pixel Intensity	Normalized Pixel Intensity	Normalized Pixel Intensity	Normalized Pixel Intensity	Normalized Pixel Intensity	Normalized Pixel Intensity	Normalized Pixel Intensity	Normalized Pixel Intensity	Normalized Pixel Intensity	Normalized Pixel Intensity	Normalized Pixel Intensity	Normalized Pixel Intensity	Normalized Pixel Intensity	Normalized Pixel Intensity
(basal to apical distance um)	MYC - Tag	DAPI	MYC - Tag	DAPI	MYC - Tag	DAPI	MYC - Tag	DAPI	MYC - Tag	DAPI	MYC - Tag	DAPI	MYC - Tag	DAPI	MYC - Tag	DAPI	MYC - Tag	DAPI	MYC - Tag	DAPI	MYC - Tag	DAPI	MYC - Tag	DAPI	MYC - Tag	DAPI	MYC - Tag	DAPI	MYC - Tag	DAPI	MYC - Tag	DAPI	MYC - Tag	DAPI	MYC - Tag	DAPI	MYC - Tag	DAPI	MYC - Tag	DAPI	MYC - Tag	DAPI	MYC - Tag	DAPI	MYC - Tag	DAPI	MYC - Tag	DAPI	MYC - Tag
0	0.0380038	0.0176416	0.000807534	0.042794	0.0727466	0.171413	0.0986601	0	0.0548169	0	0.0150532	0.254286	0.0245242	0.285547	0.0113815	0.0736738	0.0796799	0.0251167	0.0640256	0.132387	0	0.0554203	0.12041	0.112018	0.128121	0.0412027	0.110979	0.36024	0.0120608	0.260273	0.00824759	0.434436	0.0176681	0.141514	0.0158027	0.265685	0.105131	0.186304	0.0321589	0.266457	0.111964	0.507714	0.0573441	0.295028	0.0122519	0	0.019879	0.0347057	0.0565547
0.137	0.0805752	0.0358911	0.0389978	0.0523701	0.0891601	0.166728	0.131062	0.0165501	0.0847102	0.000925239	0.00849159	0.200125	0.0245242	0.391964	0	0.0895538	0.0863562	0.0167857	0.0870174	0.168174	0.0128859	0.0738927	0.066578	0.059564	0.128272	0.061842	0.0633075	0.234841	0.00834912	0.350426	0.0212307	0.36769	0.0449555	0.249899	0.0371674	0.186206	0.070573	0.143025	0.055	0.204162	0.0471685	0.317731	0.0403549	0.425658	0.0399297	0.0982243	0.0590222	0.030854	0.0786287
0.274	0.118842	0.0179904	0.0327861	0.0466269	0.081879	0.183357	0.183494	0.0366908	0.0911982	0.0106813	0.0145816	0.171467	0.0225034	0.428106	0.0141402	0.106548	0.076197	0.00920098	0.0553176	0.2187	0.0877597	0.0411014	0.093702	0.0150388	0.0766046	0.11434	0.0829377	0.189962	0.0220707	0.312587	0.0717857	0.272488	0.0698869	0.225982	0.0228024	0.126599	0.0742038	0.0932168	0.0118594	0.171457	0.097137	0.427712	0.0504285	0.29605	0.0781679	0.0812909	0.102802	0.0292489	0.113226
0.411	0.164591	0.0308344	0.0393277	0	0.0560122	0.153604	0.169203	0.04607	0.101283	0.0176719	0.0111843	0.157662	0.0245242	0.427191	0.033356	0.0545842	0.0570384	0.0101961	0.0484888	0.200727	0.102958	0.0132875	0.0676436	0.0392495	0.158473	0.037962	0.0981922	0.118516	0.0396298	0.234729	0.0917674	0.356306	0.115432	0.252091	0.0513461	0.0772213	0.0406184	0.0145455	0.0633443	0.0869346	0.0583204	0.421709	0.0374344	0.319453	0.0821253	0.0185431	0.104167	0	0.0835675
0.548	0.158872	0.0506788	0.067916	0.057298	0.0748872	0.0982049	0.127909	0.0548405	0.093258	0.0250512	0.0167166	0.150024	0.0245242	0.43095	0.0199982	0.056191	0.123947	0.0115636	0.0452938	0.102802	0.034411	0.0956601	0.151711	0.056714	0.1709	0.119222	0.138402	0.0661711	0.0739621	0.226346	0.101672	0.332044	0.168043	0.169706	0.00844004	0.0603864	0.070051	0.0447801	0.0273981	0.0819455	0.0871124	0.406651	0.0682219	0.227303	0.122551	0.0226421	0.0811806	0.0190717	0.119516
0.685	0.126887	0.0592361	0.0396276	0.0609666	0.0556875	0.0823569	0.0841406	0.0693797	0.0832138	0.0455264	0.0271381	0.138159	0.0307456	0.412685	0.0169576	0.0376003	0.123801	0.0404104	0.0508069	0.111179	0.107058	0.0537662	0.212182	0.0432524	0.101715	0.0903949	0.127855	0.00958258	0.0546405	0.218167	0.0676232	0.34211	0.0696907	0.199108	0.0426073	0.0802942	0.0675274	0	0.0612405	0.0579752	0.0974398	0.40351	0.0426207	0.325207	0.120996	0.00445456	0.156457	0.138029	0.0817387
0.822	0.158165	0.064603	0.00442331	0.0227476	0.0620929	0.0920838	0.0604656	0.0726358	0.0712928	0.0710283	0.0257709	0.12508	0.0219626	0.417	0.0282538	0.0593699	0.12772	0.0447625	0.0913401	0.177134	0.0830403	0.0204505	0.15835	0.0598069	0.087368	0	0.145045	0.0153645	0.0676204	0.164648	0.0283983	0.323178	0.0159012	0.0332423	0.0202977	0.121028	0.0986032	0.0298094	0.0403001	0.076245	0.00821407	0.308104	0.0768729	0.260774	0.0781418	0.0974122	0.112078	0.0189196	0.0535139
0.959	0.178335	0.0477568	0.0113692	0.0204358	0.0892919	0.115442	0.0382443	0.110962	0.0615119	0.0891355	0.0412769	0.0805146	0.0311648	0.424665	0.0354604	0.0694048	0.183743	0.0272305	0.107315	0.0842988	0.0238719	0.0575549	0.134105	0.0487703	0.0788204	0.0640779	0.120572	0.0140041	0.0205624	0.0702637	0.0121038	0.235728	0.0910885	0.175522	0.0282926	0.0701029	0.0750526	0.0438958	0.0284132	0.0665778	0.090301	0.231918	0.0732795	0.304231	0.0102793	0.0230166	0.20261	0.0145465	0.082859
1.096	0.120077	0.0111262	0.011531	0.0329503	0.0910442	0.0856946	0.0501336	0.137832	0.0803905	0.0973755	0.0714022	0.0751962	0.0366296	0.403824	0.0208952	0.0582452	0.208707	0.0419024	0.144779	0.0334541	0.0248003	0.0381147	0.157035	0.0246503	0.0683176	0.046239	0.116723	0.0290447	0.0444772	0.146959	0.0298181	0.152948	0.0722429	0.081289	0.0679621	0.0937099	0.0962837	0.067218	0.0476266	0.10879	0.107932	0.176084	0.0659821	0.194982	0.16208	0.0695994	0.126701	0.0696203	0.11708
1.233	0.230462	0.0365421	0.0312418	0.050046	0.10697	0.0616097	0.0617019	0.124208	0.0696921	0.115752	0.105563	0.0609491	0.0238434	0.360455	0.0299457	0.0366762	0.19187	0.0284737	0.188005	0.0604406	0.0456464	0.0610503	0.144222	0.0353387	0.183393	0.00920431	0.151799	0.104582	0.0410531	0.102422	0.0494142	0.0885155	0.0600714	0.159285	0.0981791	0.0625817	0.0993846	0.0803138	0.0600507	0.15493	0.0741703	0.203685	0.0420298	0.21658	0.130236	0.061109	0.0494483	0.0412357	0.126933
1.37	0.247862	0.0581387	0.00709003	0.0310278	0.118814	0	0.0504345	0.0967231	0.0605748	0.111761	0.118429	0.0660776	0.00741058	0.286451	0.0165896	0.0123989	0.243249	0.0744793	0.252093	0.0870027	0.065693	0.0173403	0.196856	0.0281675	0.0853763	0.120679	0.13797	0.0223396	0.00334748	0.0406037	0.104	0.108885	0.0451516	0.204592	0.0619254	0.0602992	0.0805667	0.0936327	0.0502596	0.147981	0.144067	0.211945	0.0785797	0.330609	0.115423	0.090634	0.116055	0.0904361	0.0905292
1.507	0.194825	0.0587725	0.0308561	0.0345504	0.108029	0.0441049	0.0349407	0.111897	0.0426779	0.135215	0.150277	0.0546283	0.0163861	0.220026	0.0230058	0.0113833	0.133526	0.0620458	0.2868	0.0636221	0.0621943	0.0164542	0.239971	0.0204514	0.0647764	0.138967	0.102581	0	0.023894	0.0203593	0.0976789	0.0959215	0.0639972	0.12473	0.075517	0.0679246	0.0804248	0.102378	0.0525159	0.0763204	0.174853	0.147386	0.0810312	0.175251	0.174864	0.10162	0.230056	0.103419	0.0624268
1.644	0.139978	0.0333093	0.0732477	0.0690399	0.12755	0.0569012	0.0673187	0.138092	0.0351928	0.184037	0.182953	0.041552	0.02437	0.144577	0.0281711	0.0318537	0.0724229	0.08853	0.239752	0.0205176	0.0991928	0	0.216159	0.0709949	0.0577356	0.138703	0.104173	0.0492571	0.0305765	0.0834036	0.05453	0.0489717	0.0135452	0.11387	0.124577	0.128853	0.0555445	0.0739975	0.0676884	0.0898319	0.17647	0.166035	0.022007	0.204317	0.0828087	0.072016	0.138738	0.0493638	0.0622191
1.781	0.0886189	0.0109088	0.0783715	0.051494	0.114284	0.0970724	0.0527478	0.122988	0.0402914	0.24425	0.16794	0.0422868	0.0303181	0.0937008	0.0391197	0.0367723	0.0290274	0.163755	0.316558	0.0743846	0.0560479	0.0229285	0.213213	0.112018	0.0321267	0.139663	0.180634	0.0391941	0.0490689	0.12527	0.0598606	0.0400682	0.0971743	0.130545	0.131184	0.107673	0.0662721	0.133345	0.0610428	0.172786	0.226521	0.224765	0.086499	0.329126	0.0652056	0.0898917	0.0917546	0.0751314	0.110172
1.918	0.116649	0.0123422	0.0669493	0.0543899	0.0839205	0.114434	0.0353747	0.101469	0.0331133	0.271208	0.0986814	0.023773	0.0312806	0.0472972	0.0332049	0.0405878	0.0796799	0.183028	0.402824	0	0.131051	0.045931	0.142741	0.0465267	0.0824693	0.168369	0.10569	0.0371534	0.118662	0.0975554	0.0483747	0.0476959	0.0718498	0.0549628	0.111157	0.0617592	0.048459	0.132943	0.0818094	0.171236	0.195914	0.197208	0.0768133	0.277721	0.0828357	0.158922	0.0974275	0.0486885	0.0551431
2.055	0.0900039	0	0.0672412	0.0810252	0.0823664	0.121122	0.0462292	0.0970843	0.0215078	0.23695	0.0567427	0.0040988	0.0378895	0.0284091	0.0256907	0.0529306	0.0759067	0.180416	0.420114	0.0422025	0.0591254	0.00598686	0.2217	0.0868677	0.0995307	0.143159	0.165593	0.104161	0.0896703	0.12577	0.0611061	0.0678489	0.0706722	0.134934	0.0448392	0.0769111	0.0427329	0.180082	0.103835	0.195333	0.148297	0.262923	0.0717721	0.261914	0.0972996	0.14348	0.14476	0.0939063	0.124141
2.192	0.144342	0.0580791	0.0979752	0.0916355	0.0790292	0.168707	0.0440777	0.12946	0.0220858	0.207569	0.0424358	0	0.0533198	0.00666162	0.0264988	0.0350295	0.068214	0.131302	0.436966	0.0803753	0.150719	0.109012	0.189717	0.10459	0.0992941	0.138093	0.203022	0.234976	0.108391	0.0999132	0.0804778	0.0877209	0.0818623	0.122538	0.0858702	0.105733	0.0115388	0.116601	0.0845693	0.213645	0.151331	0.208192	0.0708366	0.242848	0.0637571	0.121266	0.118418	0.0925787	0.121376
2.329	0.214601	0.0604478	0.124021	0.0841036	0.0898875	0.142459	0.0348362	0.13199	0.0408113	0.184091	0.0330978	0.0246689	0.0651219	0.00378991	0.0516339	0.0610043	0.0425252	0.094622	0.289369	0.0823901	0.119162	0.0846424	0.170065	0.153375	0.0507892	0.0863424	0.234019	0.360326	0.0487455	0.106303	0.0944732	0.0949917	0.0806838	0.137674	0.114901	0.0881236	0.0554245	0.167881	0.0452967	0.147996	0.105785	0.1678	0.0293709	0.293603	0.0452034	0.138648	0.110311	0.10572	0.0650728
2.466	0.104192	0.0696045	0.0769042	0.0625119	0.0664395	0.0921315	0.0329426	0.0928925	0.0458997	0.185197	0.0507076	0.0411129	0.0467742	0.0140093	0.0634679	0.0334389	0.0667629	0.119614	0.246894	0.0803222	0.0819744	0.130297	0.0995427	0.212029	0.0140272	0.0688238	0.244599	0.346177	0.110385	0.104477	0.105089	0.108685	0.0583046	0.17212	0.107804	0.0882076	0.0670649	0.145879	0.0455343	0.116224	0.105757	0.205919	0.0373558	0.330742	0.0775446	0.106132	0.09002	0.106457	0.0778581
2.603	0.0682988	0.0130356	0.0512647	0.0444793	0.0540907	0.0917977	0.0474486	0.0966079	0.0466085	0.161686	0.0476909	0.0396205	0.063462	0.011408	0.0866169	0.0169931	0.0879525	0.126701	0.287239	0.057949	0.0978088	0.0936859	0.102322	0.280599	0.0287989	0.133851	0.218334	0.268728	0.086392	0.0650109	0.103262	0.118686	0.135259	0.136578	0.0631795	0	0.0810546	0.131263	0.0568051	0.138814	0.110336	0.167512	0.023605	0.278172	0.104737	0.145833	0.0990414	0.138772	0.0741089
2.74	0.0946139	0.105832	0.0804129	0.0442116	0.0709434	0.111466	0.0298439	0.107926	0.0451156	0.134942	0.0519379	0.0337979	0.0596096	0.0106807	0.0796645	0.032551	0.141508	0.109543	0.262619	0.0743315	0.107308	0.162385	0.193012	0.389449	0.0504868	0.153939	0.20686	0.168319	0.057288	0.028721	0.0831255	0.0851747	0.119751	0.0669189	0.0840913	0.0666535	0.0885089	0.241643	0.0354746	0.246336	0.0917125	0.265512	0.04279	0.366878	0.103227	0.136417	0.0898778	0.20549	0.129812
2.877	0.0983904	0.144445	0.102781	0.05672	0.0926319	0.13713	0.0134948	0.126592	0.0563244	0.118902	0.0589228	0.0498065	0.0300223	0.00569353	0.0914293	0.055589	0.0716978	0.116382	0.269321	0.0768762	0.0684438	0.261395	0.116816	0.350517	0.0808931	0.126576	0.214253	0.181588	0.112366	0.00872167	0.112526	0.135017	0.144878	0.136247	0.0757101	0.0998766	0.0707491	0.24204	0.0342839	0.294959	0.12153	0.236094	0.0881549	0.430043	0.10223	0.166583	0.0838851	0.204088	0.0908844
3.014	0.0751446	0.154511	0.0618166	0.084639	0.115303	0.13446	0.0172289	0.125417	0.055589	0.128356	0.117219	0.0671886	0.0290915	0	0.183332	0.0682332	0.0841792	0.201554	0.196838	0.0857307	0.083453	0.182869	0.135852	0.20636	0.0504058	0.125944	0.183991	0.157948	0.107711	0.0224719	0.0720515	0.149953	0.191011	0.0721862	0.0886053	0.0899667	0.0653296	0.200888	0.0015231	0.338156	0.104761	0.226616	0.0465466	0.421078	0.125417	0.107768	0.0687781	0.166921	0.045912
3.151	0.0430328	0.175542	0.0515964	0.0892445	0.113091	0.149444	0.0210305	0.105845	0.032785	0.154261	0.176156	0.0568325	0.0349396	0.00863899	0.273669	0.0902303	0.0915815	0.178427	0.20066	0.103438	0.111142	0.24244	0.179184	0.209391	0.0652967	0.105399	0.197124	0.280394	0.0999519	0.015362	0.101645	0.157008	0.106008	0.114418	0.062698	0.0819543	0.0824859	0.218786	0.0798918	0.362183	0.0953865	0.288347	0.0320305	0.365111	0.0787268	0.210013	0.0529847	0.187157	0.0145368
3.288	0.042104	0.233302	0.0611816	0.127932	0.0462932	0.176312	0.0182798	0.122731	0.0290502	0.140145	0.200167	0.0662276	0.0180652	0.017753	0.188843	0.141281	0.0692304	0.191358	0.113141	0.103015	0.108597	0.24534	0.205875	0.226083	0.107604	0.144293	0.206608	0.244024	0.0717837	0.0349858	0.116933	0.133919	0.191993	0.0358734	0.0901028	0.086659	0.0925014	0.201034	0.0450857	0.363294	0.105983	0.32603	0.0493134	0.372399	0.0520501	0.155128	0.0879406	0.22193	0.0627603
3.425	0.0290425	0.400266	0.0662506	0.11695	0.0785336	0.168701	0.0290736	0.143964	0.0396023	0.100929	0.174047	0.0568924	0.0254816	0.0598989	0.0756141	0.24649	0.106966	0.117874	0.0710426	0.0971292	0.109328	0.22082	0.279942	0.23959	0.109637	0.167533	0.13717	0.197164	0.0888528	0.0976232	0.049254	0.21305	0.0579123	0.027975	0.0920714	0.140129	0.0562321	0.187364	0.0240717	0.422367	0.162852	0.168466	0.0414355	0.395593	0.0602801	0.145491	0.0872604	0.193887	0.107411
3.562	0	0.307236	0.0731371	0.0838298	0.0976432	0.172742	0.0355054	0.155679	0.0390225	0.100295	0.168268	0.084864	0.0336388	0.0887584	0.0913955	0.272019	0.0722777	0.144731	0.0780586	0.1212	0.0723981	0.197918	0.241335	0.112018	0.114357	0.0906593	0.0845027	0.261953	0.10653	0.0848224	0.0715111	0.204104	0.128388	0.0183193	0.0910711	0.211668	0.0617479	0.214283	0.052343	0.534855	0.0835143	0.17583	0.0765429	0.437659	0.0488509	0.178177	0.0541667	0.229804	0.0557842
3.699	0.047918	0.264388	0.0570386	0.0688696	0.0952617	0.186945	0.0316852	0.139769	0.0271725	0.11626	0.170209	0.114173	0.025205	0.123601	0.0548993	0.282396	0.0444118	0.151818	0.116274	0.184398	0.0391304	0.239371	0.161096	0.164457	0.178452	0.0852453	0.0685085	0.32421	0.0572622	0.0711348	0.0907455	0.132362	0.102475	0.0398226	0.0705906	0.156315	0.0325763	0.223406	0.0333353	0.605272	0.0558892	0.318968	0.0555932	0.45653	0.0404093	0.166033	0.0670478	0.31454	0.101391
3.836	0.0507112	0.335357	0.0580487	0.0560569	0.0888136	0.182719	0.0395674	0.123466	0.0347259	0.124361	0.191229	0.133322	0.0310948	0.128907	0.0398434	0.329082	0.057474	0.211626	0.0820678	0.184186	0.144504	0.224574	0.090491	0.175645	0.1589	0.123122	0.0731819	0.30309	0.0698554	0.078229	0.0835462	0.136936	0.119554	0.0175541	0.0795954	0.201992	0.058577	0.22851	0.0609967	0.57131	0.0221361	0.38312	0.0442178	0.389764	0.0796739	0.218962	0.0805754	0.348575	0.0688149
3.973	0.0255898	0.409644	0.0889172	0.0592631	0.082772	0.166538	0.0369953	0.127699	0.0576548	0.0986932	0.224449	0.123195	0.053529	0.148039	0.0203138	0.476313	0.0632792	0.194218	0.0821932	0.117913	0.0671973	0.127454	0.102455	0.11358	0.0800124	0.0959228	0.0545854	0.299462	0.103622	0.148722	0.172744	0.170971	0.124462	0.0323636	0.0297121	0.199343	0.0319395	0.256507	0.0657282	0.698402	0.0271581	0.319428	0.0633873	0.391094	0.0212027	0.217784	0.0850154	0.331585	0.0598832
4.11	0.0244688	0.440355	0.112463	0.0560204	0.0821409	0.188852	0.0142962	0.131954	0.0769404	0.106167	0.182006	0.112485	0.0752658	0.161318	0.033581	0.425539	0.0885333	0.165247	0.0461707	0.173529	0.0729913	0.132165	0.0677929	0.0768618	0.0962421	0.0531732	0.0680076	0.253277	0.0828762	0.147439	0.122831	0.255497	0.1384	0.0394918	0.0103463	0.224707	0.077754	0.2634	0.0556463	0.639014	0.0412513	0.32754	0.0431761	0.383397	0.0270989	0.300775	0.0659089	0.27457	0.0542134
4.247	0.0505199	0.409836	0.105487	0.0544751	0.0479073	0.322168	0.014544	0.118953	0.0791344	0.114945	0.147453	0.127526	0.0909802	0.207305	0.0526314	0.341417	0.0796799	0.14759	0.0459208	0.161282	0.043824	0.164713	0.0628845	0.213607	0.0911806	0.111723	0.0777555	0.390472	0.081352	0.168721	0.140279	0.258746	0.083236	0.0929194	0.0157403	0.258337	0.0637433	0.260714	0.019123	0.665415	0.0374943	0.325119	0.0562903	0.423173	0.0141035	0.255184	0.0444203	0.335055	0.0165885
4.384	0.0628916	0.304055	0.100796	0.0571155	0.0828202	0.197375	0.0230329	0.11769	0.0614982	0.144115	0.117918	0.149771	0.0903994	0.209826	0.0352248	0.309572	0.08476	0.173578	0.0972293	0.215679	0.0567184	0.152415	0.0632337	0.183165	0.0590824	0.23248	0.0925982	0.341345	0.0732962	0.224896	0.113763	0.24934	0.112486	0.146559	0.0417256	0.212297	0.0277079	0.27233	0.0289735	0.604288	0.0405672	0.441917	0.0750485	0.445807	0.0226461	0.32114	0.0425366	0.384005	0.0228301
4.521	0.0661106	0.264634	0.117189	0.0743937	0.0611072	0.172605	0.0239615	0.138209	0.0326328	0.142876	0.132303	0.131803	0.0760474	0.199354	0.0405591	0.328259	0.028737	0.20143	0.138138	0.249504	0.0769284	0.241365	0.0495216	0.193247	0.0423155	0.260968	0.0714503	0.472229	0.0724137	0.304189	0.0718957	0.239123	0.0842174	0.203057	0.0638897	0.201684	0.0438427	0.308145	0.0407106	0.640243	0.0354543	0.419868	0.0748896	0.364103	0.0446819	0.278981	0.05167	0.351871	0.0492153
4.658	0.105739	0.202307	0.102622	0.0817917	0.055552	0.194568	0.0292202	0.181661	0.0156174	0.12798	0.1019	0.138423	0.0656944	0.153968	0.0540432	0.338695	0.0828733	0.249921	0.106626	0.234871	0.076	0.267246	0.0317995	0.140914	0.105999	0.0975927	0.0471769	0.525525	0.146479	0.25767	0.0611431	0.29523	0.121713	0.0502435	0.0746093	0.153389	0.0147894	0.268228	0.0444332	0.723366	0.0554673	0.313066	0.040202	0.456938	0.004142	0.325275	0.0559246	0.33912	0.00863592
4.795	0.0650139	0.282037	0.121725	0.100481	0.0620001	0.144467	0.0313422	0.207762	0.0176533	0.153025	0.0686824	0.145463	0.0449126	0.129918	0.0691961	0.334241	0.0786636	0.200808	0.0946604	0.296372	0.0587644	0.15627	0.119878	0.159621	0.0341103	0.224818	0.0459025	0.49594	0.153306	0.213154	0.118311	0.279186	0.159994	0.163452	0.0898689	0.20581	0.0315611	0.203841	0.0394667	0.643263	0.0570889	0.435483	0.0421983	0.572583	0.0202295	0.350411	0.0671495	0.305555	0.0679239
4.932	0.0865338	0.289306	0.162841	0.106395	0.0949498	0.163748	0.021907	0.176386	0.0200936	0.195884	0.0513949	0.156426	0.0254858	0.135346	0.0439997	0.361203	0.0647311	0.242834	0.0810028	0.162236	0.0296315	0.140951	0.108479	0.179192	0.0650352	0.223674	0.0370468	0.497376	0.107629	0.247112	0.134399	0.333066	0.164313	0.0803017	0.0896897	0.172604	0.0574856	0.245685	0.0603991	0.487141	0.0216479	0.406329	0.0232388	0.594105	0.0275759	0.29671	0.0462549	0.307747	0.0607931
5.069	0.0770445	0.386079	0.157301	0.122365	0.136685	0.180782	0.0150429	0.175014	0.0333878	0.19915	0.043977	0.173969	0.0153195	0.168783	0.0353893	0.427431	0.0483303	0.199689	0.0900243	0.191131	0.0446836	0.156385	0.0927368	0.193732	0.0369444	0.206063	0.060314	0.556049	0.0668379	0.295791	0.172089	0.305793	0.106008	0.0829329	0.11745	0.179784	0.118859	0.282806	0.054141	0.49572	0.0189105	0.393788	0.0262785	0.584379	0.0381033	0.292346	0.0424762	0.312779	0.0628709
5.206	0.0596431	0.367697	0.142738	0.127603	0.225785	0.214976	0.0105831	0.19873	0.0110096	0.191073	0.0399022	0.186158	0.0212651	0.189172	0.0450745	0.417016	0.0619733	0.188374	0.0919035	0.186465	0.0754326	0.186947	0.0703054	0.261422	0.0325172	0.354791	0.0667368	0.637465	0.103888	0.316327	0.154944	0.324216	0.110131	0.233989	0.0537019	0.231502	0.0350903	0.298198	0.0622467	0.481191	0.0266814	0.492238	0.0414554	0.628008	0.0318267	0.206203	0.0446652	0.283359	0.08891
5.343	0.0598707	0.364809	0.129021	0.139856	0.14996	0.226896	0	0.245812	0.00346379	0.177515	0.0442526	0.228562	0.0350705	0.235785	0.0497882	0.368886	0.0213347	0.152813	0.113141	0.190336	0.135495	0.312469	0.0529165	0.18888	0.0443543	0.321735	0.101459	0.522896	0.0860586	0.368303	0.144932	0.478121	0.104831	0.174751	0.0364555	0.266968	0.042697	0.277469	0	0.477893	0.0413555	0.420027	0.0685001	0.565551	0.0320148	0.309001	0.0540503	0.287319	0.0662812
5.48	0.0555307	0.457027	0.139738	0.149262	0.160298	0.218403	0.0114418	0.231548	0.00798697	0.154474	0.0553844	0.218508	0.0647595	0.264831	0.0482057	0.426858	0.0448474	0.177308	0.109884	0.209846	0.0389499	0.189224	0.0965148	0.203358	0.0603856	0.271033	0.0547922	0.408277	0.0377114	0.364912	0.0997764	0.4496	0.102082	0.284672	0.0375978	0.184525	0.0803302	0.284076	0.0136795	0.520123	0.100998	0.417716	0.042638	0.487525	0.0413521	0.301861	0	0.275126	0.0679796
5.617	0.0522641	0.426022	0.159106	0.13937	0.172331	0.179477	0.00865238	0.226946	0.0164263	0.18626	0.0504689	0.22942	0.105871	0.332213	0.0651785	0.360774	0.02656	0.182654	0.121912	0.268378	0.0235883	0.103951	0.0901408	0.209316	0.0553597	0.271997	0.0601384	0.432004	0.0300007	0.369716	0.0915201	0.435631	0.0278766	0.236951	0.0457088	0.174165	0.0654785	0.27623	0.0435112	0.477949	0.0143104	0.411167	0.0575195	0.416056	0.11305	0.300336	0.0317824	0.288019	0.0253782
5.754	0.0272257	0.346492	0.120829	0.134296	0.119692	0.193388	0.0319381	0.239527	0.00650176	0.236443	0.0326786	0.246364	0.130884	0.362164	0.0416953	0.355322	0.0513785	0.167609	0.0466096	0.22098	0.100173	0.180538	0.0997426	0.260421	0.0356234	0.286767	0.0454017	0.418049	0.0313256	0.3827	0.0558213	0.39839	0.0276797	0.178044	0.0441723	0.139735	0.0560429	0.238284	0.0795141	0.529004	0.0664082	0.446266	0.0967947	0.374674	0.0498451	0.306727	0.0302124	0.207428	0.0480096
5.891	0.0358096	0.384173	0.0787121	0.147802	0.140696	0.248185	0.0298624	0.241824	0.00401615	0.231104	0.0244356	0.286803	0.128614	0.357428	0.0658017	0.34048	0.0834532	0.191358	0.0354581	0.240173	0.0890578	0.21645	0.0902075	0.211803	0.0275375	0.264545	0.10339	0.505744	0.0321248	0.384312	0.0415099	0.439415	0.0151159	0.384828	0.0415732	0.143654	0.0403679	0.38114	0.0835958	0.63443	0.0715494	0.378585	0.111192	0.425567	0.0712576	0.334874	0.0247026	0.241214	0.0509254
6.028	0.0414081	0.446633	0.0995638	0.155066	0.132035	0.265106	0.0127177	0.237504	0.000157328	0.243697	0.0375671	0.298238	0.110009	0.399356	0.0681665	0.349991	0.0782289	0.195834	0.0727964	0.308089	0.0823612	0.259144	0.146386	0.201175	0.0137256	0.309503	0.13426	0.378838	0.0318273	0.353614	0.0657862	0.448692	0.0445624	0.250887	0.0349857	0.213258	0.0446968	0.390004	0.0621155	0.488992	0.0866719	0.456454	0.0951353	0.455375	0.0389851	0.289563	0.0586748	0.206965	0.0266459
6.165	0.049657	0.426963	0.116143	0.118356	0.0725966	0.288005	0.0389581	0.251005	0.00624183	0.280947	0.0210711	0.273181	0.078779	0.426452	0.0457858	0.316317	0.0461533	0.148586	0.0610815	0.210589	0.0171668	0.197877	0.0875618	0.219898	0.0727787	0.326672	0.103424	0.394575	0.0318273	0.357307	0.0993099	0.493533	0	0.605543	0.0550097	0.206549	0.0491474	0.34289	0.0594789	0.543872	0.0535464	0.437593	0.0304221	0.452482	0.0393751	0.349198	0.0247983	0.214593	0.0618486
6.302	0.0440221	0.404324	0.159358	0.159489	0.0813353	0.310242	0.0683822	0.238578	0.00647525	0.236563	0	0.250706	0.0809331	0.411439	0.0505395	0.282797	0.05312	0.12608	0.0721075	0.263978	0.0330786	0.280291	0.0636666	0.262937	0.0821073	0.283516	0.0634822	0.410971	0.0218665	0.364307	0.108771	0.545127	0.0453477	0.436059	0.0540908	0.322658	0.0903501	0.273245	0.0294336	0.565468	0.0806736	0.420271	0.0305914	0.381017	0.0764364	0.3177	0.0589817	0.217169	0.0600657
6.439	0.0470732	0.41542	0.120461	0.161667	0.0998038	0.352446	0.0668796	0.197543	0.00987149	0.228656	0.00321521	0.271602	0.0855371	0.369091	0.0738226	0.292533	0.0320747	0.179297	0.067346	0.307188	0.0499102	0.235425	0.0689083	0.242759	0.0810185	0.159336	0.0969276	0.350215	0.035214	0.314804	0.0679665	0.492474	0.00961937	0.382632	0.0385427	0.226533	0.0674477	0.286869	0.000444164	0.588044	0.0655625	0.490282	0.0250847	0.342558	0.0640687	0.352282	0.044272	0.228654	0.0536794
6.576	0.0645708	0.42598	0.123054	0.164922	0.100273	0.410384	0.0632854	0.190805	0	0.305963	0.0173695	0.288021	0.088822	0.372776	0.0979122	0.290707	0.0577644	0.180789	0.0663437	0.382368	0.0508644	0.229965	0.0445296	0.21585	0.0886605	0.14173	0.0956613	0.300688	0.0383298	0.37293	0.0911671	0.449211	0.0918739	0.468309	0.0279712	0.252432	0	0.28702	0.0418533	0.526973	0.082176	0.474063	0.052347	0.351451	0.0260603	0.253184	0.0488775	0.219508	0.0567004
6.713	0.0578808	0.41015	0.147669	0.182559	0.0714326	0.386716	0.0627907	0.205853	0.00318162	0.357241	0.0310456	0.285016	0.140164	0.398444	0.121623	0.345575	0.0426704	0.220951	0.0305094	0.395305	0.0571569	0.19311	0.082736	0.253265	0.0503151	0.23472	0.127182	0.435783	0.0351356	0.373503	0.0824521	0.566193	0.0312133	0.367496	0.0567488	0.236794	0.0172158	0.265966	0.0210752	0.44214	0.0335201	0.549899	0.0605669	0.421348	0.0275663	0.247442	0.0508458	0.225661	0.0410991
6.85	0.0507234	0.383543	0.154851	0.169844	0.0601214	0.375928	0.0460556	0.21416	0.0123657	0.324207	0.0496085	0.319326	0.11131	0.384171	0.10865	0.348115	0.0899843	0.287721	0.0431012	0.369643	0.0617301	0.20958	0.0488897	0.196521	0.0695808	0.204635	0.100861	0.417374	0.0404156	0.353165	0.00398824	0.51514	0.0912846	0.548497	0.0167545	0.247382	0.0492622	0.299422	0.0339949	0.515596	0.107749	0.591043	0.0199969	0.45939	0.0398827	0.254212	0.0156002	0.26778	0.0324398
6.987	0.0561782	0.410248	0.198024	0.121446	0.0697704	0.413996	0.0467601	0.227885	0.0261704	0.276418	0.027134	0.3689	0.0731117	0.358914	0.0379311	0.339308	0.0793896	0.237364	0.0233044	0.343823	0.128627	0.29772	0.0663452	0.135487	0.113915	0.187676	0.0526988	0.450559	0.0539838	0.332206	0.0478712	0.466174	0.124854	0.428487	0.00268574	0.262151	0.0465809	0.289535	0.0101776	0.576275	0.000736221	0.567163	0.0395602	0.32563	0.0384593	0.285919	0.0697359	0.309577	0.0401964
7.124	0.0753601	0.441427	0.242872	0.221934	0.0568742	0.461635	0.0360582	0.2071	0.0447924	0.267378	0.0104601	0.403307	0.058898	0.285095	0.00569166	0.322759	0.0314948	0.192104	0.040157	0.34393	0.11605	0.30995	0.0669779	0.096646	0.035587	0.162907	0.101859	0.433019	0.0642571	0.388584	0.0703113	0.526898	0.0869657	0.388447	0.0200967	0.223307	0.0220151	0.278377	0.0486018	0.612353	0.144348	0.601461	0.0678738	0.361153	0.0640983	0.38304	0.0595964	0.328106	0.0562346
7.261	0.0867909	0.409113	0.147237	0.332217	0.0510008	0.480195	0.00254254	0.271992	0.0781135	0.238062	0.0104584	0.414217	0.0519824	0.274389	0.0218794	0.331628	0.0281562	0.174075	0.0841978	0.357609	0.0347721	0.216217	0.0666447	0.170779	0.0565819	0.19119	0.0682509	0.40195	0.0678963	0.405568	0.0666567	0.417154	0.0691015	0.380223	0	0.249632	0.0348284	0.305715	0.136264	0.572054	0.0502502	0.533359	0.0515057	0.483378	0.0720002	0.310273	0.0599567	0.29433	0.0515341
7.398	0.0877326	0.363529	0.13335	0.305946	0.0692802	0.428044	0.0367745	0.267051	0.0951203	0.233352	0.0293954	0.449052	0.0444935	0.261363	0.0612098	0.325869	0.0766317	0.292943	0.0958508	0.275801	0.0247144	0.186579	0.0551134	0.276521	0.0565454	0.182525	0.03114	0.424473	0.0828912	0.405005	0.0411112	0.456654	0.114842	0.366618	0.0254847	0.225051	0.0368247	0.367244	0.081328	0.638133	0.0574102	0.618558	0.0449184	0.449455	0.037964	0.436936	0.0770053	0.294428	0.0447737
7.535	0.0814624	0.35595	0.0682406	0.33302	0.0636533	0.380017	0.0249155	0.271204	0.134499	0.229587	0.0233037	0.441008	0.063747	0.205846	0.0648824	0.269554	0.068214	0.196953	0.0632741	0.271772	0.036242	0.160337	0.0705551	0.355247	0.0378402	0.184809	0.0390377	0.509674	0.176013	0.404754	0.0621782	0.495317	0.0687093	0.328004	0.031258	0.281107	0.0605373	0.392581	0.0446309	0.646273	0.0732019	0.580266	0.0590311	0.49984	0.0612386	0.4677	0.0753449	0.328609	0.0325171
7.672	0.0762473	0.355414	0.0796708	0.375199	0.0625985	0.433038	0.0260338	0.274537	0.229183	0.216796	0.0102583	0.401079	0.0362471	0.200553	0.0476021	0.265498	0.0573288	0.210382	0.0727337	0.296638	0.0559276	0.13868	0.11184	0.255691	0.0862347	0.112265	0.0616855	0.518911	0.146762	0.47423	0.0736359	0.524595	0.117198	0.536324	0.0271389	0.244134	0.0437744	0.374893	0.0525904	0.678526	0.0294912	0.520769	0.0556666	0.494984	0.0417674	0.39613	0.0501785	0.359719	0.0530626
7.809	0.0639709	0.340061	0.0427109	0.423907	0.0597486	0.47107	0.0274387	0.289395	0.30132	0.214753	0.0210637	0.380571	0.0328572	0.206104	0.0595161	0.301408	0.0671985	0.222443	0.0640256	0.317314	0.0286773	0.180989	0.0674437	0.222718	0.0857811	0.0780572	0	0.455612	0.103047	0.566116	0.0565079	0.387719	0.0706722	0.436385	0.0642491	0.289148	0.0884607	0.345569	0.0410466	0.587248	0.0366054	0.508673	0.0820073	0.485136	0.0487891	0.289664	0.071492	0.317647	0.0521176
7.946	0.0824812	0.313947	0.0293375	0.38236	0.0427277	0.4071	0.026365	0.327475	0.319409	0.244915	0.0203411	0.386219	0.0328572	0.234453	0.0925655	0.238387	0.0304785	0.225427	0.0466096	0.295259	0.0576039	0.215949	0.0632506	0.279477	0.0671239	0.126931	0.0540507	0.604383	0.0842778	0.619536	0.0848745	0.579832	0.100119	0.345445	0.0202708	0.248055	0.105914	0.302532	0.032658	0.554854	0.0490037	0.375948	0.116523	0.536271	0.0192318	0.293041	0.0698212	0.408523	0.02857
8.083	0.0481223	0.344424	0.0465504	0.360111	0.0565623	0.457743	0.0608279	0.314691	0.332489	0.270958	0.0232028	0.335348	0.0346163	0.209738	0.075022	0.255231	0.0628445	0.21175	0.0508696	0.363123	0.0474688	0.244254	0.0571762	0.28683	0.0374034	0.0863573	0.0497097	0.533304	0.053723	0.698657	0.064884	0.479651	0.127406	0.450538	0.0541756	0.308004	0.106098	0.345782	0.0464643	0.57433	0.0586134	0.531537	0.0504761	0.580655	0.0162059	0.383753	0.0664374	0.424151	0.0659477
8.22	0.0620771	0.369534	0.0495577	0.396548	0.0468943	0.495918	0.0933803	0.283572	0.281325	0.266265	0.0251967	0.314121	0.0234734	0.208671	0.0688804	0.239667	0.0513785	0.261734	0.0342678	0.377914	0.0600022	0.182319	0.0663452	0.282661	0.0426295	0.157036	0.0511632	0.485127	0.0493264	0.796911	0.0662263	0.520611	0.0618382	0.315935	0.0791294	0.295506	0.0701097	0.26615	0.0535691	0.59185	0.0143713	0.409786	0.0245232	0.477372	0.0219793	0.326868	0.0975732	0.348678	0.0287597
8.357	0.0601944	0.328956	0.0675242	0.431098	0.0410027	0.441353	0.0731749	0.268178	0.242082	0.253074	0.0247809	0.298317	0.02514	0.202109	0.0951072	0.222839	0	0.343673	0.0219268	0.43088	0.0859631	0.223423	0.0659622	0.237317	0	0.118461	0.0391143	0.416526	0.0572622	0.899735	0.0886479	0.48557	0.0889295	0.28248	0.0782079	0.229593	0.0963521	0.284548	0.051874	0.598253	0.0549721	0.416637	0.0786454	0.51338	0	0.381029	0.0626776	0.255949	0.0689849
8.494	0.0457844	0.387771	0.06663	0.339018	0.0538989	0.47939	0.0471604	0.243296	0.218899	0.269704	0.030533	0.265732	0.0146353	0.181303	0.0990066	0.227704	0.055297	0.229903	0.0338924	0.494184	0.0823011	0.180578	0.085715	0.245321	0.0698672	0.132127	0.0453366	0.492814	0.0816528	0.804976	0.034654	0.558771	0.0716537	0.415765	0.0673549	0.329214	0.105658	0.212236	0.0408462	0.601975	0.0844059	0.512839	0.0616009	0.505095	0.058082	0.390228	0.105342	0.355937	0.0675112
8.631	0.0341797	0.440908	0.0671978	0.394601	0.0647927	0.537036	0.0484919	0.292711	0.13343	0.295604	0.0327188	0.255478	0.0313506	0.180523	0.0965342	0.25186	0.0743095	0.229779	0.0506815	0.53522	0.0650569	0.192908	0.085715	0.289119	0.102206	0.206663	0.0719235	0.586205	0.056003	0.776004	0.0746341	0.472494	0.0671386	0.528534	0.0352204	0.330771	0.0652429	0.23004	0.0263555	0.615062	0.103674	0.546461	0.015671	0.491953	0.0425448	0.417245	0.0713067	0.318787	0.0614593
8.768	0.0438784	0.469956	0.0315938	0.474202	0.070095	0.581404	0.0480959	0.315525	0.0667029	0.331979	0.0316534	0.273885	0.0346321	0.17603	0.0771601	0.22184	0.0986925	0.260242	0.0622092	0.515922	0.0592114	0.200424	0.0568101	0.244897	0.118245	0.176541	0.0797874	0.52085	0.0684729	0.787146	0.0667025	0.511259	0.111113	0.417848	0.0579856	0.292912	0.0371786	0.272943	0.0479404	0.555711	0.0635251	0.473727	0.0444226	0.540081	0.0366965	0.295965	0.0682582	0.269753	0.0572551
8.905	0.0537208	0.447032	0.0423818	0.517489	0.0574153	0.554291	0.0522345	0.291248	0.0505297	0.356392	0.0396594	0.261678	0.0621529	0.209266	0.0380529	0.196679	0.0973866	0.257134	0.0209872	0.451663	0.0628562	0.247208	0.0979119	0.381035	0.0829265	0.129072	0.0403388	0.436215	0.121417	0.68861	0.0512917	0.703664	0.0588938	0.554535	0.011364	0.17581	0.0456279	0.271739	0.0348965	0.641233	0.00905711	0.48439	0	0.482727	0.0455916	0.494976	0.0252181	0.297907	0.0187194
9.042	0.055207	0.43207	0.0194755	0.547434	0.0487402	0.570503	0.0633679	0.25467	0.0437167	0.315616	0.0208808	0.287337	0.0535423	0.23282	0.0647997	0.18613	0.0529748	0.370282	0.0422243	0.52117	0.0776848	0.204959	0.129396	0.328277	0.0821722	0.107426	0.0511285	0.444653	0.160456	0.79026	0.0737002	0.592369	0.103064	0.459754	0.0336796	0.317796	0.0928299	0.199465	0.0147966	0.716728	0.0882115	0.421561	0.0195529	0.410535	0.0429504	0.590111	0.0431832	0.297577	0.0220587
9.179	0.0464197	0.336561	0.0251901	0.479659	0.0551428	0.570955	0.0683013	0.232182	0.0463015	0.296925	0.0154322	0.270454	0.0390062	0.210463	0.061168	0.221578	0.0635695	0.310723	0.0767428	0.443074	0.0777106	0.282562	0.153258	0.298928	0.035981	0.14321	0.0752289	0.485802	0.114766	0.708187	0.0424667	0.632188	0.115038	0.52963	0.0400255	0.281966	0.149403	0.23518	0.0591775	0.707608	0.109273	0.362251	0.0379691	0.348297	0.0532915	0.50261	0.03523	0.296732	0.0715437
9.316	0.0374524	0.254789	0.0465955	0.526226	0.0925237	0.553951	0.0550847	0.224866	0.0469343	0.302329	0.0137491	0.257883	0.0407369	0.208962	0.0502256	0.232357	0.0680688	0.323779	0.0329529	0.424783	0.0718222	0.231968	0.0931865	0.32373	0.0167465	0.109851	0.0318601	0.549457	0.0738529	0.522617	0.0632124	0.59998	0.117787	0.460959	0.0361792	0.273009	0.153431	0.250134	0.0462533	0.730325	0.0695914	0.361009	0.0761818	0.324998	0.0301954	0.564432	0.0689436	0.361577	0
9.453	0.0715421	0.303715	0.0774207	0.528008	0.074117	0.518989	0.0696017	0.234392	0.0409361	0.313564	0.0196021	0.271458	0.0396895	0.24893	0.0584013	0.229845	0.0673437	0.377245	0.0379016	0.518201	0.0932957	0.195023	0.0678427	0.348152	0.0402001	0.231572	0.030845	0.486072	0.131781	0.590408	0.0462314	0.56974	0.0912846	0.488055	0.0194463	0.298171	0.0958169	0.314225	0.113263	0.608542	0.0509617	0.228572	0.0611137	0.396833	0.0248285	0.606694	0.072236	0.299067	0.0558192
9.59	0.0568741	0.346985	0.0425366	0.487617	0.0732731	0.568476	0.0817303	0.210281	0.0570725	0.288744	0.0188877	0.255904	0.0428135	0.242011	0.0688804	0.236346	0.0551518	0.425364	0.0649652	0.492169	0.106371	0.249179	0.0764962	0.441463	0.0503889	0.30471	0.0570397	0.516034	0.115012	0.488048	0.0543927	0.728239	0.0117784	0.512298	0.0274741	0.318183	0.0921607	0.245127	0.0839673	0.608843	0.0612282	0.190381	0.0616009	0.417619	0.0438462	0.524356	0.0679495	0.36378	0.0597501
9.727	0.0658293	0.357149	0.0511489	0.561561	0.0823874	0.551925	0.123738	0.25074	0.0583124	0.294687	0.0109711	0.232826	0.0588113	0.214792	0.0566632	0.308233	0.0924518	0.39975	0.0301332	0.388942	0.0720714	0.272425	0.105583	0.489414	0.0609985	0.212157	0.140092	0.44339	0.146356	0.493786	0.0736042	0.760723	0.057127	0.336229	0.0401129	0.328293	0.128218	0.273814	0.0304753	0.544202	0.00775592	0.217023	0.0968888	0.541487	0.0156226	0.434635	0.091602	0.303417	0.024319
9.864	0.057641	0.353237	0.0484344	0.499256	0.0976005	0.522667	0.156404	0.241156	0.0518072	0.268906	0.0237482	0.247794	0.0521857	0.245131	0.0607644	0.298109	0.0701006	0.363568	0.0506188	0.353473	0.0401877	0.232372	0.0680924	0.378806	0.0203981	0.173409	0.0935384	0.449674	0.0748404	0.472671	0.0480085	0.724947	0.0830398	0.510763	0.0286676	0.273193	0.0917183	0.285081	0.0376298	0.546765	0.0106267	0.284238	0.0638407	0.567309	0.0311573	0.397723	0.108533	0.358946	0.065312
10.001	0.0458441	0.344875	0.0373014	0.454643	0.075912	0.543414	0.206487	0.252795	0.0457355	0.231597	0.0299761	0.309424	0.0486233	0.224342	0.0257174	0.207908	0.0442666	0.331612	0.0335163	0.298281	0.0416147	0.157776	0.0879279	0.352458	0.0610794	0.265818	0.0725732	0.440799	0.0885728	0.438462	0.0340633	0.785022	0.0575192	0.316705	0.0151392	0.298548	0.0733655	0.309907	0.0840914	0.637784	0.0229765	0.241104	0.0839318	0.541283	0.0436573	0.376563	0.0942902	0.358815	0.0875766
10.138	0.0233895	0.338104	0.0632106	0.472401	0.0716527	0.446955	0.206102	0.291569	0.0587775	0.209797	0.0371529	0.291344	0.0372254	0.223398	0.0290255	0.193384	0.0442666	0.274789	0.0289428	0.322934	0.0495491	0.18029	0.18208	0.412916	0.0629057	0.234179	0.0609369	0.377775	0.0527963	0.416726	0.0442984	0.724288	0.0689054	0.386472	0.0558377	0.390217	0.0813822	0.306532	0.0701752	0.529927	0.0421553	0.322132	0.107523	0.527928	0.0667325	0.39731	0.0777563	0.332933	0.107392
10.275	0.0653134	0.394686	0.07885	0.511788	0.0323904	0.311994	0.181425	0.344108	0.0886032	0.201057	0.0338351	0.329823	0.0161911	0.213284	0.064461	0.186716	0.05312	0.308609	0.0466096	0.304643	0.0545866	0.203756	0.142425	0.478817	0.039082	0.248476	0.0695734	0.404514	0.0145099	0.418864	0.066831	0.749122	0.0677278	0.363656	0.0593757	0.411994	0.00607467	0.278438	0.0606545	0.563569	0.050568	0.430608	0.144473	0.448486	0.0936303	0.343573	0.0649597	0.387179	0.079356
10.412	0.141872	0.324708	0.0786864	0.500649	0.0235972	0.342808	0.1539	0.326912	0.102013	0.202159	0.0229215	0.322143	0.00775307	0.236695	0.0563343	0.228331	0.0619733	0.284239	0.0970412	0.283224	0.0388295	0.199889	0.15018	0.297321	0.0289652	0.246645	0.0864971	0.369585	0.0479147	0.352941	0.0660062	0.752933	0.114253	0.389434	0.066035	0.449944	0.02347	0.270484	0.0468615	0.564926	0.0673369	0.242193	0.0725591	0.416479	0.0445722	0.240746	0.125891	0.377592	0.0760338
10.549	0.193213	0.363342	0.0492251	0.475285	0.0520138	0.342588	0.147092	0.331604	0.0839603	0.19089	0.0155052	0.333466	0.0195493	0.240243	0.0262464	0.210056	0.0341074	0.351383	0.107566	0.285504	0.0699825	0.188819	0.0482907	0.282343	0.00892654	0.180413	0.0566387	0.319032	0.0409931	0.390049	0.0627134	0.714925	0.106008	0.377917	0.0505467	0.380484	0.0339682	0.299832	0.0753597	0.515417	0.0665583	0.21546	0.113222	0.459347	0.0914348	0.285995	0.0694514	0.308489	0.10151
10.686	0.183581	0.44557	0.0161454	0.444987	0.0636533	0.425302	0.137471	0.334622	0.0493882	0.170908	0.0232553	0.377878	0.0316856	0.22093	0.0309405	0.225892	0.0634243	0.344792	0.173408	0.299871	0.0582916	0.197058	0.103537	0.265742	0.0173834	0.0838413	0.0514832	0.322412	0.0411223	0.418687	0.0725365	0.721298	0.0795062	0.3008	0.047576	0.364739	0.062806	0.273703	0.101273	0.597155	0.0349837	0.290677	0.0754942	0.55326	0.072539	0.315567	0.0738836	0.301351	0.0432236
10.823	0.0914667	0.377496	0.0257067	0.455792	0.0634878	0.397361	0.116625	0.297639	0.036932	0.153835	0.0387195	0.396998	0.0201618	0.247363	0.0390459	0.209673	0.0756163	0.271308	0.117589	0.303	0.0530908	0.21981	0.156703	0.315164	0.101494	0.0628199	0.0855944	0.370546	0.0500705	0.380269	0.0546673	0.682976	0.0861812	0.413677	0.0433842	0.365626	0.0878212	0.333072	0.0598805	0.521155	0.0357438	0.247754	0.143184	0.416892	0.0889582	0.3078	0.0548702	0.315406	0.0497682
10.96	0.0577371	0.375557	0.0223368	0.452422	0.0570397	0.388832	0.126754	0.229343	0.0572102	0.142472	0.0578106	0.415158	0.024475	0.250895	0.0508889	0.167201	0.0619733	0.397388	0.179172	0.305491	0.0572256	0.307189	0.146235	0.289953	0.05303	0.113548	0.0740784	0.314859	0.0448047	0.294821	0.0477427	0.656904	0.0755804	0.340069	0.036297	0.314305	0.0532136	0.327057	0.0744741	0.588397	0.00646003	0.293132	0.200835	0.496733	0.143649	0.301437	0.0574988	0.216467	0.0701591
11.097	0.0441061	0.424002	0	0.501981	0.067979	0.420212	0.145012	0.206032	0.0685002	0.126005	0.0425285	0.414547	0.0218201	0.244844	0.0865724	0.176744	0.0526844	0.274914	0.149602	0.236833	0.0930378	0.328713	0.117415	0.283843	0.113967	0.185031	0.0983491	0.267357	0.0518964	0.341444	0.052304	0.621539	0.0759726	0.29652	0.0606349	0.308922	0.0800166	0.309572	0.092925	0.594734	0.098124	0.341238	0.155462	0.529135	0.0869481	0.499222	0.0939134	0.290034	0.0505343
11.234	0.0360017	0.46731	0.0198735	0.530144	0.0538143	0.463113	0.118609	0.165295	0.0544809	0.112183	0.0298096	0.320239	0.0324372	0.242829	0.0444495	0.235431	0.0542806	0.334846	0.138889	0.285716	0.0882067	0.345992	0.12219	0.292591	0.0715911	0.163139	0.0998329	0.309601	0.0701204	0.481403	0.0732785	0.613495	0.0596791	0.465347	0.048087	0.308601	0.0886183	0.313474	0.0498731	0.435573	0.0650161	0.31437	0.130504	0.455465	0.0761073	0.476777	0.0769079	0.362044	0.0431643
11.371	0.0679569	0.524173	0.0418308	0.500138	0.0667105	0.501151	0.115515	0.192014	0.0602396	0.130519	0.020834	0.338111	0.0273682	0.289788	0.0547793	0.315495	0.0397674	0.281753	0.303841	0.25136	0.0329582	0.23568	0.0715203	0.279629	0.0311846	0.186296	0.0718103	0.379044	0.0924561	0.424315	0.0983751	0.581259	0.0530042	0.538955	0.0419655	0.349821	0.0611093	0.246862	0.00756674	0.412512	0.0193474	0.385776	0.121113	0.380243	0.11169	0.398626	0.0713601	0.356758	0.0607005
11.508	0.100704	0.472848	0.0408402	0.499499	0.0730258	0.504274	0.127042	0.200189	0.0582439	0.148926	0.0204789	0.344662	0.0358838	0.281141	0.0417539	0.335478	0.0566029	0.278023	0.124982	0.271772	0.0322791	0.174073	0.034096	0.305219	0.072929	0.183026	0.127323	0.280421	0.0721612	0.43563	0.0837575	0.632139	0.0836291	0.346541	0.0668881	0.313916	0.0416897	0.273321	0.0139056	0.46726	0.085768	0.574796	0.156172	0.425681	0.0924673	0.286395	0.0907149	0.349164	0.0582639
11.645	0.0761573	0.451464	0.0359437	0.444513	0.0533578	0.456217	0.117062	0.183269	0.0441066	0.141671	0.0252935	0.327767	0.0620262	0.279618	0.0288993	0.283019	0.0741652	0.391669	0.117276	0.295365	0.0759656	0.255571	0.102305	0.279811	0.0379202	0.135374	0.119036	0.333209	0.0675846	0.410044	0.0670502	0.700388	0.0392619	0.416861	0.0380846	0.304674	0.059523	0.283696	0.00295134	0.438673	0.0148604	0.548465	0.0877619	0.39679	0.0889965	0.295431	0.0585842	0.345753	0.020995
11.782	0.0811023	0.496426	0.0470245	0.401415	0.0548819	0.490488	0.157135	0.218562	0.0607749	0.144383	0.0201533	0.287531	0.0258133	0.26451	0.0452114	0.30059	0.0981126	0.305874	0.106438	0.311588	0.0670598	0.167818	0.15845	0.188334	0.0421349	0.163867	0.102603	0.361644	0.0557872	0.435598	0.134839	0.632334	0.164902	0.38395	0.0160105	0.270567	0.0548201	0.247467	0.00570143	0.43146	0.0770993	0.491577	0.149174	0.256303	0.0998703	0.350285	0.0732913	0.297966	0.0641126
11.919	0.0603087	0.493667	0.0481664	0.442645	0.0608425	0.419139	0.178718	0.236717	0.0607133	0.148056	0.0308184	0.293961	0.0142262	0.254613	0.0292104	0.319056	0.117996	0.292197	0.066281	0.328926	0.0372822	0.165979	0.0750814	0.411643	0.0331754	0.110363	0.1573	0.448421	0.0671304	0.467366	0.0851588	0.544327	0.0989411	0.392618	0.0254154	0.344955	0.0629961	0.195867	0.0547057	0.525131	0.0383223	0.52575	0.250525	0.305039	0.0617679	0.257819	0.0857594	0.325222	0.0520754
12.056	0.0514072	0.412847	0.0296895	0.498824	0.0832949	0.408387	0.20055	0.216884	0.0436116	0.140096	0.0423932	0.29208	0.0107546	0.264659	0.00472171	0.30288	0.0592155	0.369411	0.0901497	0.410309	0.0781061	0.263994	0.198187	0.263938	0.0453648	0.233473	0.245041	0.352795	0.110284	0.508277	0.0759535	0.572989	0.147037	0.359489	0.0367196	0.258965	0.0148884	0.218323	0.0892148	0.601047	0.0101323	0.581512	0.294889	0.242767	0.0914078	0.255398	0.147043	0.319986	0.0855464
12.193	0.0521143	0.328527	0.02441	0.498586	0.108383	0.47582	0.203529	0.175204	0.0514865	0.131495	0.0715457	0.284501	0.0161061	0.281389	0.0592512	0.313799	0.0243829	0.246938	0.0762421	0.360737	0.0829372	0.274907	0.168884	0.213758	0.036505	0.177743	0.196642	0.436771	0.13706	0.479358	0.0569841	0.634956	0.0885364	0.424212	0.000122119	0.288752	0.0547859	0.268541	0.0785531	0.620961	0.0421588	0.582371	0.345609	0.347404	0.109417	0.377195	0.224096	0.404284	0.0869886
12.33	0.0347787	0.349587	0.0347983	0.501306	0.0972459	0.561729	0.178055	0.16078	0.0722846	0.129156	0.121292	0.26872	0.0241517	0.287274	0.0413148	0.198271	0.0544258	0.339197	0.0768682	0.249027	0.0629766	0.2393	0.0373914	0.26133	0.0524873	0.294977	0.144155	0.332669	0.117905	0.414222	0.091579	0.633394	0.0530042	0.442639	0.0456118	0.278586	0.0395051	0.240802	0.0646005	0.584788	0.0149522	0.580971	0.232995	0.21524	0.0634297	0.362881	0.197343	0.270314	0.120994
12.467	0.0344134	0.362495	0.0414797	0.509026	0.088459	0.471839	0.188018	0.189808	0.102067	0.125337	0.120696	0.28208	0.0145637	0.268602	0.0359191	0.21882	0.040928	0.413428	0.110698	0.340696	0.0363624	0.24251	0.0894752	0.268304	0.0965054	0.251812	0.123315	0.405545	0.0740237	0.411655	0.00311859	0.688117	0.0620343	0.435072	0.0372358	0.255165	0.0464916	0.296084	0.0719846	0.4989	0.0118422	0.656744	0.301197	0.38011	0.0926945	0.318458	0.126308	0.243393	0.0263124
12.604	0.0580487	0.332125	0.0179789	0.45738	0.0904131	0.410312	0.228003	0.214023	0.162406	0.110287	0.121194	0.347375	0	0.267793	0.0380529	0.280526	0.0792444	0.316567	0.0822559	0.337355	0.0528071	0.280666	0.0896422	0.355171	0.101043	0.23587	0.0882902	0.403969	0.0492139	0.315086	0.0534676	0.638908	0.0345508	0.440773	0.0355227	0.321985	0.0423317	0.325226	0.0621262	0.34208	0.0689135	0.62013	0.15213	0.216641	0.165662	0.346841	0.0404347	0.248415	0.0621687
12.741	0.0458623	0.309984	0.00318326	0.445681	0.0493804	0.408012	0.255933	0.208643	0.199411	0.0961239	0.0968606	0.342079	0.0088897	0.206085	0.0338192	0.315144	0.0821474	0.350512	0.0800005	0.330835	0.0987372	0.305464	0.0895089	0.356157	0.0613338	0.209401	0.0420036	0.360332	0.047888	0.297909	0.0918677	0.820955	0.0512373	0.536763	0.0114861	0.282036	0.0607458	0.278631	0.146974	0.410608	0.0958359	0.715551	0.154818	0.218171	0.138259	0.288712	0.0593188	0.256447	0.0701941
12.878	0.0450651	0.294707	0.0192137	0.491541	0.0555311	0.450746	0.297406	0.223676	0.242422	0.116244	0.061709	0.283745	0.0222809	0.237343	0.0209201	0.291098	0.0564586	0.404351	0.117589	0.351724	0.0740744	0.333201	0.10372	0.399166	0.0418395	0.255205	0.0499878	0.405065	0.0340331	0.232866	0.0612989	0.673083	0.0738136	0.407314	0.0147746	0.249047	0.0566893	0.303932	0.122528	0.428831	0.0973939	0.714285	0.115615	0.38391	0.198765	0.221486	0.0681168	0.311498	0.0924722
13.015	0.0185284	0.298607	0.0521448	0.485993	0.0807124	0.418585	0.246528	0.196819	0.321208	0.139579	0.0404361	0.238059	0.0401903	0.24725	0.0333187	0.300441	0.0499266	0.338825	0.156932	0.356018	0.111382	0.354503	0.0428659	0.236756	0.0375858	0.205179	0.0590262	0.41854	0.0333565	0.267456	0.0993003	0.879203	0.0441701	0.515591	0.0206259	0.204377	0.0667846	0.396494	0.13744	0.354551	0.0456651	0.605963	0.128415	0.217197	0.153479	0.275233	0.0758199	0.269774	0.0931753
13.152	0.0372127	0.344918	0.0704085	0.486121	0.108699	0.493426	0.165553	0.230112	0.376203	0.143595	0.0467468	0.25531	0.0401053	0.221334	0.037779	0.319684	0.0349777	0.357102	0.119531	0.221988	0.165565	0.390646	0.12665	0.353837	0.0593021	0.228135	0.0831293	0.493522	0.0522455	0.30276	0.0342235	0.784952	0.140755	0.621997	0.0262035	0.236829	0.0740426	0.34349	0.131974	0.410962	0.0149584	0.636915	0.0928955	0.348705	0.197306	0.312605	0.114072	0.368493	0.126623
13.289	0.0611241	0.385189	0.12755	0.502876	0.129802	0.515485	0.119701	0.205644	0.382882	0.153247	0.0576629	0.26268	0.0586447	0.232989	0.0391597	0.319307	0.0455725	0.335467	0.15167	0.250299	0.13559	0.37681	0.0732515	0.389555	0.0751262	0.21559	0.111805	0.386461	0.0850112	0.353368	0.0544887	0.6448	0.124854	0.472041	0.0427909	0.288552	0.102824	0.410268	0.230185	0.405426	0	0.612541	0.142121	0.372213	0.172372	0.217089	0.0842929	0.387679	0.108575
13.426	0.0770142	0.340912	0.139485	0.491073	0.0963083	0.566193	0.164094	0.166763	0.357407	0.160464	0.0383569	0.239709	0.0578564	0.218114	0.0228831	0.275191	0.0433955	0.355859	0.16113	0.197652	0.104927	0.388663	0.0725023	0.29958	0.120124	0.135459	0.253026	0.359004	0.109212	0.373196	0.0513604	0.659093	0.186104	0.499794	0.0784695	0.311748	0.115179	0.396738	0.230104	0.361669	0.014042	0.685275	0.0856715	0.142464	0.151482	0.248478	0.149094	0.38276	0.11013
13.563	0.108041	0.320935	0.156851	0.508753	0.0720191	0.621998	0.190159	0.197352	0.295923	0.168427	0.0483659	0.307962	0.0578564	0.20674	0.0244549	0.261692	0.0181422	0.350885	0.13582	0.190442	0.0472195	0.350238	0.0904074	0.269381	0.200049	0.148029	0.200661	0.352412	0.089667	0.361662	0	0.594331	0.227918	0.497928	0.0347726	0.311272	0.079103	0.276782	0.166877	0.347696	0.0375429	0.657722	0.205539	0.239689	0.165573	0.25364	0.176645	0.245889	0.0514172
13.7	0.182561	0.337603	0.159431	0.533544	0.0928874	0.58281	0.194569	0.200272	0.196995	0.176948	0.039999	0.284291	0.04858	0.282381	0.0287944	0.267916	0.0626993	0.296176	0.103932	0.244998	0.0101522	0.350234	0	0.213879	0.272059	0.161698	0.261202	0.368025	0.0528163	0.36523	0.0353775	0.627296	0.167846	0.496393	0.0311749	0.296451	0.104019	0.249517	0.25056	0.372001	0.0681313	0.597894	0.10007	0.344553	0.170212	0.231448	0.108545	0.267354	0.0633546
13.837	0.209847	0.320906	0.146735	0.516175	0.0620092	0.662241	0.200983	0.173068	0.112402	0.187091	0.0381125	0.2766	0.0514866	0.305084	0.0611262	0.281074	0.0882429	0.400496	0.15286	0.255707	0.0374369	0.316825	0.0824365	0.281539	0.204596	0.192004	0.204619	0.292066	0.0287265	0.366654	0.0582023	0.601867	0.106008	0.498807	0.0490943	0.280561	0.10321	0.235287	0.258592	0.414118	0.0289633	0.556223	0.220128	0.461694	0.0856998	0.213866	0.0780485	0.241137	0.0796501
13.974	0.104133	0.404936	0.128991	0.54789	0.0884862	0.59963	0.221416	0.178378	0.0856293	0.171619	0.0557125	0.281861	0.0493358	0.329444	0.0553937	0.251378	0.0708266	0.313459	0.235242	0.284762	0.0867539	0.313376	0.0687918	0.272155	0.240913	0.166679	0.250756	0.385938	0.0392364	0.401697	0.0695236	0.643248	0.0954075	0.560128	0.0438172	0.269591	0.0744719	0.167465	0.172509	0.392824	0.0731225	0.50292	0.228779	0.494652	0.0725982	0.168636	0.110516	0.223258	0.103177
14.111	0.0764031	0.396022	0.0970722	0.535266	0.0896948	0.587686	0.217639	0.186235	0.103067	0.212258	0.088588	0.282043	0.0337922	0.325562	0.0265869	0.231461	0.0885333	0.298539	0.320818	0.264667	0.120408	0.311152	0.0691242	0.288345	0.307144	0.178091	0.200629	0.314767	0.0568663	0.257696	0.0674348	0.556155	0.0924631	0.47445	0.0354612	0.301776	0.0549716	0.175547	0.154135	0.45176	0.0715891	0.720172	0.2297	0.410953	0.0407001	0.124134	0.0920409	0.257557	0.0955517
14.248	0.118543	0.354632	0.0588801	0.524796	0.0991909	0.541042	0.170961	0.209631	0.12136	0.286089	0.11479	0.249851	0.0349405	0.316274	0.0220501	0.203444	0.10624	0.354491	0.293692	0.269121	0.0924103	0.27752	0.0557285	0.237559	0.255632	0.214499	0.130996	0.265742	0.109623	0.278634	0.0909286	0.61224	0.158423	0.416422	0.0655457	0.257845	0.0765645	0.224483	0.22149	0.410924	0.0587785	0.646269	0.272972	0.386889	0.0446715	0.198747	0.0952437	0.29145	0.136127
14.385	0.143221	0.37824	0.0534989	0.56512	0.0843952	0.490697	0.179161	0.16762	0.105238	0.315145	0.10678	0.245669	0.0377445	0.343954	0.0135384	0.199363	0.0780837	0.35387	0.267944	0.278876	0.087648	0.291065	0.0624019	0.351654	0.211722	0.105021	0.162829	0.328717	0.135787	0.268103	0.0672931	0.711265	0.0206124	0.444283	0.00406369	0.302336	0.06669	0.272867	0.204712	0.381385	0.0617013	0.636738	0.297539	0.421011	0.0489501	0.252432	0.0837584	0.271666	0.207545
14.522	0.106399	0.421897	0.0908587	0.550257	0.070606	0.505054	0.163249	0.12916	0.0607886	0.283203	0.075331	0.230896	0.0259666	0.331892	0.0497713	0.353506	0.0568932	0.25216	0.203479	0.257722	0.0936138	0.263564	0.0717869	0.333053	0.121214	0.169309	0.176703	0.229782	0.0542888	0.283652	0.076567	0.661093	0.0957997	0.480705	0.0227227	0.331418	0.0340987	0.227781	0.224725	0.378182	0.0976685	0.595732	0.31623	0.397484	0.0640443	0.220798	0.115534	0.293764	0.234368
14.659	0.0357377	0.437212	0.0804111	0.55384	0.0894811	0.456569	0.149565	0.113478	0.0314725	0.265176	0.0577466	0.229307	0.0257666	0.35583	0.0209076	0.31625	0.081131	0.299409	0.0727337	0.162554	0.0737735	0.220482	0.0807728	0.297503	0.174149	0.163784	0.112642	0.212766	0.0660863	0.276141	0.0691345	0.591071	0.0651757	0.480157	0.0244636	0.324912	0.0793185	0.151396	0.291794	0.328032	0.0954545	0.541341	0.381222	0.35053	0.0838203	0.20971	0.121562	0.328805	0.337903
14.796	0.000623212	0.485233	0.153871	0.60969	0.0953581	0.394792	0.179347	0.105705	0.0429994	0.27446	0.0690687	0.213901	0.0456401	0.383488	0.0663653	0.309101	0.136718	0.267329	0.0620211	0.177187	0.0790259	0.268574	0.0806724	0.265969	0.131766	0.282207	0.143345	0.181362	0.0833128	0.278963	0.0535679	0.573718	0.0477037	0.419932	0.0370695	0.263453	0.0898806	0.209966	0.277037	0.412351	0.0842532	0.473291	0.339872	0.479116	0.0657149	0.196348	0.0982413	0.313383	0.186565
14.933	0.0184445	0.37952	0.178484	0.624699	0.0801113	0.427776	0.180184	0.102035	0.0466863	0.266925	0.103416	0.172169	0.0506166	0.35495	0.118557	0.311305	0.131349	0.374012	0.0828201	0.26541	0.0952987	0.285428	0.0161908	0.32479	0.0715493	0.223875	0.201755	0.219897	0.0949636	0.209565	0.0721844	0.598272	0.0785248	0.569783	0.0624234	0.338982	0.0697321	0.169983	0.240535	0.490175	0.0598784	0.506798	0.31989	0.39355	0.119091	0.210562	0.0865698	0.268077	0.267198
15.07	0.0106457	0.406944	0.108328	0.646985	0.118213	0.52306	0.164014	0.0869415	0.0357169	0.236675	0.178998	0.166108	0.0604979	0.305501	0.0931842	0.299532	0.132364	0.359216	0.0613323	0.254488	0.111554	0.217151	0.0472918	0.248201	0.0856352	0.233619	0.100277	0.199566	0.0657346	0.221391	0.0891884	0.586649	0.0598753	0.421798	0.0889959	0.326064	0.0700045	0.158857	0.262363	0.382087	0.0881082	0.447479	0.294349	0.330514	0.120585	0.384568	0.16442	0.256753	0.328305
15.207	0.10659	0.361683	0.0944904	0.696799	0.105904	0.329422	0.163719	0.0966161	0.0500817	0.226121	0.21715	0.156245	0.0557964	0.279846	0.0717734	0.274036	0.0988377	0.304507	0.151482	0.264509	0.108176	0.239544	0.0490728	0.259284	0.0887957	0.301997	0.121103	0.208355	0.0724696	0.207682	0.119836	0.568864	0.0712614	0.482131	0.159379	0.301626	0.0820724	0.165035	0.195733	0.361768	0.0387258	0.637754	0.328603	0.258398	0.104067	0.288069	0.273647	0.301278	0.21219
15.344	0.0473312	0.353951	0.0647982	0.739283	0.0838868	0.276996	0.110963	0.0713589	0.0518217	0.211785	0.20621	0.164261	0.0764949	0.252478	0.0563805	0.286094	0.0756163	0.303014	0.173221	0.191343	0.125231	0.279509	0.0738167	0.269653	0.0906353	0.243088	0.0807623	0.33004	0.115454	0.18642	0.174022	0.502458	0.0304279	0.474124	0.104018	0.342294	0.102941	0.191111	0.242521	0.441782	0.087876	0.428038	0.282288	0.336766	0.121276	0.155059	0.219878	0.190133	0.188152
15.481	0.0454364	0.335481	0.0670811	0.645457	0.0228161	0.29499	0.106975	0.0858921	0.0429575	0.214073	0.249676	0.153	0.146911	0.222189	0.0851837	0.250384	0.186936	0.35275	0.18481	0.19516	0.143533	0.312613	0.0951328	0.316953	0.0812489	0.276921	0.113508	0.252591	0.0621655	0.262469	0.239223	0.348559	0.0753834	0.365522	0.146149	0.329712	0.0997122	0.170103	0.236067	0.444472	0.089269	0.535037	0.475283	0.338861	0.114359	0.286822	0.219808	0.232893	0.142751
15.618	0.0812824	0.324708	0.059134	0.59063	0.0486084	0.340555	0.0992584	0.0634014	0.0411259	0.23988	0.345331	0.141672	0.196582	0.263387	0.10066	0.308549	0.139476	0.300901	0.14766	0.164834	0.102597	0.286623	0.14587	0.343149	0.0490261	0.199615	0.124851	0.211508	0.0516897	0.160396	0.289989	0.33585	0.0665494	0.544987	0.130922	0.205995	0.0749773	0.144487	0.180353	0.487235	0.104187	0.503591	0.557831	0.360735	0.168896	0.29207	0.291384	0.201627	0.0657274
15.755	0.0798256	0.362287	0.0898769	0.579666	0.0568142	0.400508	0.0749708	0.07431	0.0289646	0.21699	0.539015	0.133173	0.191987	0.275402	0.0578856	0.259318	0.0744547	0.257383	0.130557	0.09697	0.0987028	0.261762	0.0911727	0.188456	0.0765005	0.164204	0.0644224	0.0655826	0.108718	0.13371	0.269394	0.417613	0.048096	0.501877	0.0872845	0.282458	0.0789076	0.162348	0.165944	0.421609	0.103824	0.401703	0.520738	0.366964	0.241847	0.175497	0.210891	0.155875	0.0909662
15.892	0.0613093	0.448146	0.0166566	0.532638	0.0551074	0.410843	0.0716925	0.0775882	0.0198293	0.197098	0.50203	0.143097	0.215543	0.271497	0.0436103	0.271821	0.0714074	0.282996	0.189258	0.125282	0.147719	0.279761	0.0758306	0.184468	0.0887263	0.209164	0.0643573	0.0939632	0.232257	0.102579	0.347684	0.405218	0.0492744	0.393166	0.0975771	0.298514	0.0697821	0.17131	0.15168	0.356459	0.0498406	0.400572	0.509687	0.368607	0.183167	0.167402	0.373691	0.183259	0.0955606
16.029	0.0725427	0.461739	0.0355669	0.597589	0.0379901	0.39301	0.0808817	0.0824093	0.0241379	0.201475	0.502255	0.132763	0.174292	0.228527	0.0408978	0.362735	0.101741	0.246813	0.222963	0.131751	0.160949	0.221473	0.0613532	0.242683	0.0552823	0.191035	0.0751015	0.152965	0.0846537	0.171158	0.340631	0.443507	0.0742058	0.465347	0.0979686	0.357581	0.0821661	0.133999	0.229849	0.405798	0.0245981	0.373901	0.54034	0.390961	0.24919	0.19822	0.37554	0.156003	0.0717316
16.166	0.0638151	0.376211	6.36829e-05	0.61471	0.0649582	0.408489	0.104956	0.0727827	0.0674998	0.2214	0.498606	0.11531	0.140132	0.220561	0.0947436	0.361907	0.264004	0.226919	0.166831	0.0836098	0.119557	0.208264	0.185158	0.209483	0.0819374	0.132358	0.0870221	0.184536	0.158955	0.109224	0.228685	0.402217	0.0573231	0.404905	0.0491584	0.268798	0.122827	0.191824	0.386907	0.317465	0.0365904	0.359964	0.332287	0.434528	0.284006	0.192095	0.419623	0.204615	0.0536308
16.303	0.0485594	0.301992	0.0215239	0.576484	0.0724338	0.468382	0.125766	0.0771437	0.0980412	0.247387	0.421712	0.124264	0.109707	0.202505	0.106258	0.338371	0.266616	0.301522	0.190198	0.118549	0.102932	0.27517	0.251686	0.264969	0.158265	0.0752545	0.0791475	0.27485	0.228084	0.125969	0.188774	0.407083	0.0498628	0.61827	0.0882502	0.298611	0.118301	0.201739	0.321263	0.426198	0.105785	0.391213	0.201076	0.400848	0.270978	0.217186	0.405335	0.174536	0.0868717
16.44	0.0554831	0.304651	0.0442048	0.520841	0.0851463	0.37637	0.130162	0.0845465	0.0948074	0.295348	0.354153	0.138815	0.132188	0.191377	0.107124	0.323914	0.21785	0.276903	0.169086	0.121571	0.148544	0.26175	0.206074	0.355475	0.112631	0.102705	0.053852	0.276329	0.206941	0.136631	0.167437	0.455908	0.0117784	0.393275	0.0934364	0.2731	0.065772	0.235455	0.145273	0.432058	0.125678	0.513985	0.221287	0.407347	0.263019	0.212107	0.348004	0.134798	0.0863304
16.577	0.0714997	0.3233	0.0581142	0.606606	0.096753	0.413871	0.120645	0.11429	0.110932	0.318295	0.344518	0.149032	0.161157	0.228739	0.173369	0.304174	0.165601	0.217345	0.124982	0.166584	0.184245	0.253565	0.240837	0.234057	0.166905	0.209902	0.0497632	0.290706	0.154641	0.143464	0.18843	0.488014	0.0441701	0.476316	0.0474054	0.323619	0.0998567	0.229877	0.395466	0.263319	0.197702	0.518065	0.248257	0.421709	0.216633	0.226051	0.17055	0.131066	0.0749037
16.714	0.089063	0.298977	0.051776	0.544349	0.095319	0.430619	0.0936087	0.154309	0.155826	0.317787	0.330709	0.116929	0.2032	0.251535	0.140271	0.245089	0.0796799	0.222319	0.0940334	0.206824	0.14759	0.267952	0.190433	0.208831	0.0965223	0.159065	0.050223	0.249962	0.157667	0.159285	0.201803	0.477007	0.0151159	0.569344	0.0527726	0.275147	0.0833872	0.193081	0.259584	0.339009	0.257414	0.440167	0.232243	0.400178	0.301558	0.151733	0.223446	0.223687	0.150982
16.851	0.101369	0.300827	0.0482531	0.468812	0.0878697	0.406319	0.124102	0.10487	0.154041	0.311043	0.383148	0.0949015	0.195187	0.244141	0.152311	0.304355	0.126559	0.258377	0.0922797	0.16547	0.146988	0.207896	0.219853	0.193292	0.138366	0.140749	0.0854634	0.271049	0.218682	0.157955	0.241105	0.544348	0.0718498	0.45383	0.0666664	0.203777	0.10983	0.153243	0.275853	0.392287	0.160976	0.372525	0.204581	0.443935	0.257264	0.111385	0.199022	0.222033	0.0745521
16.988	0.105235	0.242778	0.0309065	0.537523	0.0722774	0.41846	0.136655	0.0879215	0.128778	0.317293	0.443245	0.103418	0.369353	0.240491	0.18211	0.271102	0.175325	0.167858	0.113518	0.103491	0.174092	0.22003	0.210135	0.225325	0.147722	0.0728182	0.096663	0.295818	0.333345	0.161481	0.122675	0.320913	0.0435809	0.442091	0.0418148	0.248594	0.124373	0.138573	0.202533	0.370738	0.149938	0.409575	0.176215	0.371482	0.151565	0.139005	0.200173	0.190577	0.0470601
17.125	0.0934445	0.230938	0.0159933	0.525167	0.0764294	0.450698	0.094781	0.0849852	0.152499	0.348073	0.438842	0.114452	0.346945	0.224952	0.133691	0.235345	0.197386	0.177681	0.0291936	0.0736955	0.206492	0.267245	0.197821	0.18412	0.127235	0.102133	0.0275716	0.224697	0.29852	0.0821203	0.143421	0.466888	0.0579123	0.579217	0.0378577	0.205822	0.105556	0.176885	0.255191	0.422155	0.145609	0.293947	0.104643	0.384371	0.164284	0.187538	0.22808	0.144613	0.0483036
17.262	0.127989	0.271239	0.0236715	0.517532	0.0716736	0.435136	0.0693986	0.0856336	0.140125	0.322397	0.476576	0.11169	0.232963	0.207028	0.109052	0.233564	0.334975	0.165993	0.0221767	0.0748614	0.19413	0.244159	0.207472	0.159409	0.1743	0.0853682	0.04318	0.159767	0.243641	0.0712443	0.204038	0.300322	0.0742058	0.604556	0.112746	0.330817	0.153443	0.185856	0.190864	0.453484	0.244604	0.301522	0.128991	0.457898	0.276928	0.163855	0.136534	0.170701	0.0459291
17.399	0.144606	0.299364	0.0153502	0.633278	0.0999993	0.395639	0.0660293	0.095478	0.100146	0.348006	0.5587	0.101332	0.156573	0.214152	0.113966	0.197464	0.278807	0.144358	0.030384	0.247596	0.240301	0.264946	0.247359	0.198431	0.246303	0.115889	0.0486046	0.177486	0.188497	0.0102135	0.282272	0.297365	0.0286611	0.589307	0.100677	0.30061	0.222763	0.169848	0.182071	0.400531	0.28328	0.325781	0.182204	0.407604	0.17635	0.138181	0.180829	0.175736	0.0352989
17.536	0.124801	0.24516	0.0203989	0.615519	0.0947243	0.466332	0.0596203	0.0977445	0.0750464	0.366498	0.624079	0.0931429	0.141532	0.207344	0.0972409	0.165485	0.306238	0.142866	0.0273771	0.239855	0.22935	0.270298	0.282304	0.196794	0.289328	0.125226	0.0664195	0.219876	0.183062	0	0.205375	0.280326	0.120339	0.483227	0.0767269	0.29789	0.225214	0.254084	0.231429	0.44825	0.256486	0.202002	0.160143	0.383882	0.143917	0.155828	0.198147	0.221878	0.133792
17.673	0.183101	0.296859	0.0240323	0.613353	0.0821018	0.436161	0.0606594	0.0928688	0.0473575	0.277374	0.544256	0.0952319	0.129747	0.181965	0.100164	0.167307	0.321187	0.118496	0.0618957	0.193146	0.216163	0.281178	0.346054	0.1761	0.37695	0.223897			0.161948	0.0193108	0.187317	0.301398	0.0771502	0.518661	0.0705976	0.293213	0.130967	0.274529	0.146472	0.354734	0.189772	0.256734	0.14034	0.39976	0.279608	0.118187	0.197095	0.213414	0.146482
17.81	0.321665	0.25541	0.0384185	0.61387	0.0803368	0.389226	0.078447	0.118689	0.0565689	0.25258	0.466166	0.0990565	0.107464	0.202404	0.135848	0.165928	0.361681	0.0782095	0.0404705	0.170083	0.226057	0.248775	0.384759	0.0351566	0.418939	0.238948			0.203194	0.02303	0.180791	0.279191	0.028465	0.457997	0.0568267	0.199854	0.0882049	0.272115	0.146139	0.270532	0.166487	0.217138	0.208237	0.38268	0.233435	0.187776	0.312354	0.219865	0.101486
17.947	0.409079	0.207457	0.0620988	0.615744	0.108943	0.350348	0.0861092	0.120512	0.0955427	0.246953	0.351361	0.102746	0.129622	0.189964	0.165726	0.165056	0.271695	0.129562	0.0553176	0.204969	0.204351	0.221822	0.401899	0.137866	0.311624	0.222593			0.216582	0.0140684	0.208351	0.307334	0.0683162	0.542796	0.0684731	0.22368	0.0532223	0.208669	0.170817	0.303835	0.194821	0.211687	0.195874	0.317852	0.291432	0.154118	0.212865	0.211587	0.245674
18.084	0.496565	0.176788	0.0497991	0.551936	0.104028	0.350932	0.0768585	0.094834	0.156898	0.244217	0.328267	0.102547	0.155184	0.152952	0.179687	0.114678	0.172712	0.184146	0.0989204	0.228138	0.153762	0.199247	0.255546	0.201114	0.315373	0.127667			0.25142	0.0694186	0.208416	0.29629	0.0559485	0.451525	0.0808798	0.292386	0.0461868	0.142667	0.110382	0.283587	0.214291	0.194475	0.179356	0.326504	0.213136	0.148608	0.173446	0.201119	0.195458
18.221	0.555183	0.21877	0.0361613	0.51668	0.110812	0.355968	0.063834	0.101826	0.184508	0.196569	0.286344	0.0955291	0.116508	0.16973	0.17483	0.110497	0.15936	0.183401	0.0826321	0.208097	0.195549	0.168446	0.224679	0.258678	0.274784	0.198905			0.252883	0.114102	0.184162	0.318654	0.0453477	0.620244	0.12472	0.283627	0.0860037	0.143994	0.0857528	0.2731	0.177563	0.199787	0.155899	0.378993	0.277106	0.199954	0.145867	0.187295	0.202046
18.358	0.473259	0.179213	0.0466849	0.574763	0.135922	0.367429	0.0747618	0.105041	0.161412	0.194948	0.297548	0.0860046	0.122037	0.153132	0.153647	0.102145	0.0764865	0.079577	0.0671579	0.143627	0.189867	0.215941	0.31046	0.169384	0.264287	0.209118			0.329568	0.0882495	0.274785	0.295582	0.0532003	0.548063	0.180859	0.278584	0.0456463	0.201903	0.0741833	0.228245	0.185553	0.142654	0.0951958	0.296653	0.230691	0.259068	0.13259	0.234921	0.163414
18.495	0.555273	0.140923	0.0583008	0.571319	0.145418	0.310564	0.067917	0.0910543	0.125844	0.185541	0.304455	0.0850163	0.120493	0.133947	0.144738	0.0994664	0.11727	0.154056	0.039092	0.230206	0.12946	0.223735	0.365473	0.157317	0.308635	0.203605			0.40215	0.0851249	0.322093	0.212158	0.00883403	0.561115	0.141706	0.294338	0.0545757	0.131524	0.0553564	0.288124	0.155201	0.133535	0.0970754	0.262208	0.189019	0.226131	0.116351	0.228142	0.15781
18.632	0.459089	0.10607	0.0559428	0.554887	0.148025	0.286402	0.0643413	0.133623	0.105564	0.163173	0.341671	0.0945075	0.118123	0.10249	0.161431	0.155537	0.168213	0.17967	0	0.247542	0.173138	0.230767	0.383229	0.20313	0.222714	0.225793			0.424335	0.101932	0.291234	0.216424	0.0268943	0.711184	0.12853	0.199557	0.0432944	0.197899	0.055172	0.325671	0.210833	0.165403	0.101605	0.304255	0.174415	0.197066	0.160028	0.165602	0.123216
18.769	0.253048	0.0717313	0.0455501	0.547112	0.15406	0.314968	0.0585711	0.1118	0.11734	0.159535	0.410507	0.129849	0.0934618	0.0967416	0.188363	0.201422	0.120173	0.213491	0.0391547	0.122896	0.254012	0.199389	0.329979	0.214728	0.0854359	0.201995			0.324121	0.114999	0.266848	0.223354	0.0115823	0.480596	0.16772	0.239913	0.068709	0.16378	0.0849274	0.29242	0.195897	0.160776	0.06994	0.257804	0.220477	0.190658	0.185922	0.410794	0.110956
18.906	0.168127	0.0607076	0.0470334	0.513991	0.134717	0.361457	0.0791263	0.112543	0.171301	0.128105	0.393413	0.161355	0.102841	0.094188	0.125985	0.0903325	0.113787	0.125831	0.0503062	0.176021	0.223238	0.137301	0.417341	0.261967	0.0473271	0.197158			0.373273	0.0714739	0.209057	0.172593	0.0942299	0.49661	0.154164	0.230568	0.104646	0.20441	0.0943116	0.250533	0.155943	0.0932343	0.0610135	0.240701	0.245355	0.254953	0.154901	0.341593	0.060758
19.043	0.162649	0.0654579	0.0407747	0.466299	0.173862	0.25399	0.0716259	0.130919	0.162323	0.114855	0.327362	0.162312	0.136667	0.0992895	0.144637	0.0751514	0.199272	0.099596	0.0117776	0.191343	0.294286	0.135381	0.598339	0.265181	0.0860684	0.137466			0.409409	0.0961209	0.224156	0.181983	0.0392619	0.409728	0.171326	0.202077	0.0678532	0.168481	0.0326083	0.206089	0.199315	0.0933062	0.0693362	0.147191	0.215208	0.189222	0.15936	0.244013	0.0614683
19.18	0.171172	0.0707358	0.0316433	0.422465	0.194793	0.239782	0.0686789	0.15228	0.109376	0.113252	0.319888	0.169564	0.170303	0.0779418	0.215441	0.0943717	0.126995	0.132173			0.442779	0.178118	0.642319	0.249294	0.111154	0.207274			0.42133	0.0798095	0.225736	0.199784	0.118768	0.48926	0.108929	0.208208	0.0827092	0.17298	0.0467028	0.367238	0.226264	0.196585	0.0424954	0.137813	0.339371	0.0970879	0.0920469	0.263637	0.0460774
19.317	0.174241	0.087633	0.0435237	0.380024	0.21742	0.243775	0.0558482	0.139843	0.118773	0.0984708	0.339305	0.201136	0.130679	0.0984407	0.116299	0.0703219	0.099128	0.136898			0.436572	0.157097	0.541895	0.236726	0.12297	0.169758			0.474552	0.0945821	0.169892	0.173588	0.146056	0.586128	0.0771998	0.18999	0.0839653	0.207538	0.0396103	0.343913	0.190114	0.18433	0.0440235	0.152132	0.418753	0.187201	0.0966877	0.214418	0.0723547
19.454	0.231366	0.103697	0.0476596	0.351752	0.215385	0.213211	0.0376425	0.0837903	0.0676939	0.117227	0.341115	0.196252	0.172753	0.0846272	0.112699	0.0362903	0.142089	0.115262			0.408557	0.160101	0.369699	0.185939	0.0722761	0.118706			0.30736	0.0992351	0.123573	0.175874	0.0441701	0.495514	0.0835933	0.225988	0.0496099	0.223976	0.0733552	0.317677	0.168412	0.13797	0.111788	0.194074	0.301588	0.232617	0.103456	0.240775	0.0966153
19.591	0.292202	0.0421258	0.0456102	0.412433	0.218967	0.196207	0.072901	0.0797979	0.0292254	0.125206	0.28933	0.212004	0.333759	0.0988976	0.120556	0.0376949	0.150216	0.138389			0.433477	0.143284	0.286332	0.186318	0.171501	0.185619			0.189065	0.0733674	0.149416	0.174296	0.0981557	0.483889	0.0411159	0.231403	0.0471249	0.197426	0.0567989	0.197528	0.149473	0.160987	0.1197	0.136278	0.306836	0.241686	0.0959549	0.197101	0.0906839
19.728	0.397276	0.0890068	0.0379904	0.463762	0.199858	0.190432	0.0749438	0.120311	0.0376134	0.138942	0.275122	0.193934	0.420171	0.109977	0.0874792	0.057654	0.269228	0.119987			0.570563	0.124038	0.267528	0.269289	0.204064	0.213699			0.1204	0.0883434	0.182568	0.205628	0.063605	0.455474	0.0582749	0.24808	0.0491054	0.265813	0.0892804	0.158841	0.0761706	0.119392	0.1091	0.106675	0.288769	0.265891	0.0770933	0.200594	0.0822224
19.865	0.380162	0.119067	0.0289448	0.422933	0.218615	0.165304	0.0828074	0.109895	0.034531	0.144707	0.291739	0.195195	0.409065	0.11514	0.130113	0.0807251	0.283452	0.103947			0.782187	0.130047	0.144555	0.197658	0.237044	0.168124			0.087532	0.130851	0.175515	0.282088	0.136436	0.476647	0.0543922	0.283391	0.0507688	0.246641	0.116774	0.201222	0.155445	0.0757975	0.0959317	0.110851	0.274866	0.203656	0.0740405	0.123739	0.153129
20.002	0.343112	0.100643	0.0465265	0.416259	0.22207	0.123476	0.0843487	0.0985997	0.0145828	0.162819	0.28357	0.214142	0.336387	0.135878	0.154817	0.0840508	0.325977	0.137519			0.741982	0.173555	0.167702	0.191184	0.313795	0.290416			0.0786137	0.110961	0.170652	0.238323	0.0663532	0.366948	0.0933905	0.208966	0.054573	0.166463	0.0459643	0.316993	0.169371	0.0737887	0.0942249	0.145476	0.243944	0.202983	0.0451549	0.0923349	0.116896
20.139	0.263089	0.105593	0.0636307	0.441471	0.230354	0.134258	0.100526	0.101723	0.0211393	0.186252	0.229279	0.202389	0.18205	0.135142	0.116339	0.0538746	0.256892	0.117874			0.871107	0.211457	0.111075	0.194792	0.233183	0.308146			0.0913119	0.103977	0.216627	0.201341	0.0353361	0.385376	0.0613261	0.177769	0.0535149	0.236466	0.0709163	0.225899	0.137487	0.0601011	0.0422147	0.161606	0.202631	0.309648	0.093797	0.137507	0.113102
20.276	0.218095	0.139056	0.0672827	0.501531	0.205735	0.171526	0.106198	0.126793	0.0211923	0.176039	0.186596	0.206035	0.18023	0.135294	0.118376	0.0662005	0.118576	0.114019			0.761409	0.137209	0.138448	0.141581	0.143124	0.14236			0.0624138	0.150402	0.172044	0.24914	0.083236	0.43211	0.0631068	0.184689	0.0754266	0.315854	0.0865259	0.127823	0.076635	0.0922419	0.0591823	0.168043	0.196498	0.212483	0.0735258	0.0919732	0.103421
20.413	0.282911	0.133213	0.0661152	0.558081	0.112829	0.184323	0.108405	0.115333	0.0218609	0.18652	0.170508	0.184033	0.156624	0.146647	0.124285	0.0323541	0.132655	0.0755981			0.717826	0.160512	0.0916721	0.164291	0.146613	0.107485			0.0726654	0.131858	0.156189	0.221651	0.0639972	0.359815	0.0950993	0.234165	0.0525741	0.199593	0.0865942	0.147883	0.0286394	0.118069	0.0271932	0.194331	0.21704	0.260347	0.113006	0.134924	0.114746
20.55	0.419982	0.152036	0.0805376	0.579764	0.0895056	0.16649	0.139886	0.0942905	0.0155319	0.21385	0.136919	0.220039	0.157619	0.105222	0.105494	0.0360535	0.0873726	0.0516009			0.646683	0.134297	0.125802	0.187743	0.0907634	0.0852051			0.0549563	0.107007	0.237341	0.198503	0.13251	0.508458	0.0893519	0.212183			0.0533537	0.122296	0.057593	0.0578957	0.0546361	0.163919	0.195978	0.280384	0.106221	0.183651	0.0638977
20.687	0.257622	0.148357	0.105171	0.540176	0.0969121	0.161621	0.192298	0.0797787	0.0153404	0.209341	0.19082	0.297785	0.174154	0.161845	0.0791782	0.0779921	0.106385	0.104196			0.513432	0.118481	0.167635	0.271942	0.0744679	0.229904			0.054558	0.145926	0.300335	0.213283	0.126621	0.423881	0.0886157	0.196087			0.0955962	0.193581	0.104535	0.0215311	0.0987296	0.248131	0.235437	0.231693	0.10847	0.0716051	0.103715
20.824	0.306331	0.128185	0.124021	0.524218	0.0867131	0.177147	0.21815	0.0578271	0.0212043	0.173946	0.163337	0.294785	0.159517	0.151848	0.127174	0.0524685	0.139186	0.104942			0.301326	0.192992	0.207573	0.243926	0.0986225	0.119365			0.0884645	0.152629	0.309718	0.215386	0.130351	0.395906	0.105036	0.229676			0.0928408	0.152594	0.0940456	0.0761379	0.080474	0.194706	0.192857	0.170482	0.0997862	0.0824134	0.119908
20.961	0.233033	0.126272	0.092058	0.463866	0.0772169	0.208556	0.272395	0.0749074	0.017218	0.168454	0.117937	0.268649	0.160817	0.138985	0.15349	0.0357844	0.20653	0.0753493			0.306175	0.139166	0.107231	0.199477	0.168148	0.098339			0.117031	0.177511	0.253915	0.277834	0.0918739	0.378465	0.140767	0.202121			0.0764928	0.13358	0.203771	0	0.081121	0.224908	0.207476	0.215402	0.0736094	0.0509839	0.0931456
21.098	0.174601	0.138197	0.0990658	0.474932	0.102209	0.210035	0.263656	0.0669404	0.0205399	0.177493	0.11499	0.289052	0.167103	0.154829	0.113507	0.0516752	0.218721	0.091265			0.338385	0.156753	0.239622	0.195293	0.175665	0.0904872			0.0705846	0.110977	0.225031	0.216829	0.0312133	0.368375	0.073447	0.199149			0.0281445	0.145555	0.148588	0.00255056	0.044927	0.15933	0.18675	0.214028	0.043453	0.0318803	0.0295815
21.235	0.134955	0.113491	0.0664531	0.417008	0.0864994	0.264361	0.325257	0.0666701	0.0207853	0.148676	0.0918811	0.288184	0.119631	0.0935843	0.0940786	0.0565239	0.205949	0.112278			0.311427	0.23375	0.293137	0.198947	0.120371	0.124219			0.0953061	0.169102	0.254707	0.0749468	0.0667464	0.495297	0.087126	0.135592			0.0141272	0.115767	0.0605105	0.0425636	0.0808533	0.151272	0.194942	0.245009	0.0531856	0.0714025
21.372	0.130771	0.100354	0.0715123	0.481813	0.0800004	0.252906	0.40459	0.0759	0.0299001	0.174779	0.0672183	0.268774	0.0979592	0.0790436	0.0935292	0.0380024	0.174164	0.110911			0.268102	0.142393	0.204777	0.0889598	0.0697533	0.0970944			0.0875536	0.147564	0.172548	0.0560858	0.0689054	0.412033	0.0516345	0.105563			0.0279353	0.0949105	0.0404877	0.0283677	0.129669	0.127113	0.109674	0.305277	0.0136984	0.0688116
21.509	0.1213	0.0768519	0.04748	0.515627	0.0764203	0.246725	0.433287	0.112273	0.0459518	0.182285	0.0350006	0.271014	0.0991766	0.143528	0.0875993	0.0212383	0.186936	0.0803233			0.171935	0.103013	0.214511	0.282176	0.0610269	0.0742251			0.131329	0.212742	0.246115	0.194443	0.0759726	0.33382	0.0622511	0.124244			0.0963516	0.0691312	0.0503296	0.0346914	0.0696792	0.0920699	0.0679478	0.200539	0.0430056	0.0716881
21.646	0.114719	0.0569055	0.0546797	0.374731	0.10716	0.266769	0.390275	0.122274	0.0370226	0.155203	0.0344855	0.272165	0.101382	0.133697	0.0652647	0.0231142	0.144411	0.0279769			0.153152	0.13773	0.173775	0.302202	0.07011	0.0610882			0.112175	0.102636	0.229573	0.0954837	0.0761687	0.353013	0.0828605	0.149327			0.145765	0.0860159	0.0543065	0.00289574	0.100668	0.10685	0.175218	0.228219	0.0592989	0.085515
21.783	0.123776	0.0915499	0.0609543	0.417659	0.0785545	0.263461	0.244261	0.115387	0.0164186	0.153206	0.0491566	0.242469	0.11849	0.141245	0.0721166	0.0281074	0.115819	0.0539635			0.194904	0.14159	0.148116	0.278294	0.064505	0.0421203			0.210504	0.180296	0.18271	0	0.123087	0.327457	0.0861638	0.0984409			0.123909	0.102557	0.0275889	0.0371509	0.0663889	0.163544	0.127997	0.192489	0.0919322	0.0593976
21.92	0.169565	0.0980401	0.0625233	0.388657	0.0817645	0.26845	0.177578	0.0995221	0.0258249	0.167497	0.0531034	0.22275	0.126542	0.152843	0.0756141	0.0155378	0.0854851	0.0861673			0.14171	0.166092	0.174708	0.165352	0.0751422	0.0644987			0.216788	0.223258	0.153167	0.122859	0.0991372	0.290156	0.06101	0.0812892			0.111484	0.0649901	0.0751263	0.0390206	0.0547743	0.191566	0.18138	0.243637	0.0828644	0.0666571
22.057	0.224467	0.091771	0.0399557	0.416119	0.0660366	0.300986	0.156736	0.0990997	0.0227673	0.188315	0.044328	0.21835	0.154346	0.14928	0.0588449	0	0.081857	0.0483683			0.106285	0.158012	0.123788	0.238272	0.0712575	0.0668151			0.258212	0.382449	0.199605	0.105084	0.134473	0.386581	0.116844	0.126974			0.119338	0.040219	0.0579628	0.0901804	0.0373385	0.133413	0.143447	0.24004	0.13711	0.0875671
22.194	0.195593	0.0724965	0.0772137	0.470649	0.0538443	0.382824	0.12034	0.0964942	0.0154883	0.142202	0.0466115	0.219834	0.19927	0.178625	0.0807332	0.00696746	0.121624	0.0799502			0.161679	0.166524	0.0895587	0.203389	0.0463326	0.186211			0.165102	0.365001	0.125029	0.0483284	0.0848066	0.441652	0.118254	0.126722			0.0647184	0.0607407	0.0292529	0.0784871	0.0631264	0.086611	0.171299	0.263668	0.0681556	0.247547
22.331	0.166293	0.0619236	0.0889172	0.480219	0.0770696	0.357327	0.0955673	0.0892649	0.0291656	0.1599	0.0361374	0.153534	0.195465	0.166624	0.117252	0.0173752	0.141363	0.0780851			0.18268	0.225321	0.146952	0.208285	0.0799181	0.127255			0.155409	0.339973	0.11232	0.0928943	0.147037	0.423441	0.133936	0.100464			0.0517464	0.110504	0.0947518	0.127931	0.126656	0	0.156043	0.238785	0.0510251	0.17791
22.468	0.147675	0.0732537	0.143891	0.404311	0.0617837	0.360551	0.0833686	0.0898564			0.04254	0.142271	0.200166	0.140094	0.0868018	0.0501576	0.166472	0.0610507			0.240989	0.220399	0.250471	0.233511	0.118359	0.142316			0.166961	0.402266	0.156611	0.078093	0.146449	0.326356	0.142746	0.166369			0.101072	0.0734749	0.0958968	0.252232	0.0401303	0.0871764	0.0608704	0.205706	0.0537184	0.0916864
22.605	0.150151	0.0574625	0.191349	0.407784	0	0.439618	0.078801	0.0970222			0.051016	0.154999	0.268499	0.129425	0.105705	0.0599357	0.145427	0.0268574			0.17521	0.120331	0.178668	0.163775	0.0892965	0.177362			0.0698621	0.446866	0.140481	0.114042	0.179625	0.317584	0.253847	0.147083			0.0845613	0.0427159	0.0639012	0.24854	0.0237372	0.146559	0.0512205	0.167148	0.057698	0.128874
22.742	0.151259	0.0635056	0.208228	0.374518			0.0902327	0.132932			0.0681058	0.1686	0.289778	0.114561	0.12641	0.0497263	0.165455	0.0427731			0.129589	0.0186973	0.140062	0.224658	0.0962483	0.0394814			0.0577997	0.407879	0.0920737	0.135417	0.164705	0.586676	0.221062	0.0873379			0.0966078	0	0.0466882	0.284468	0.0406504	0.173863	0.0626724	0.137295	0.0861525	0.168806
22.879	0.162007	0.0688393	0.203922	0.394552							0.0545166	0.168749	0.275889	0.119595	0.157635	0.0531143	0.120753	0.035934			0.130939	0.0375344	0.0953826	0.262285	0.139571	0.0977811			0.0867111	0.312227	0.100747	0.166598	0.186692	0.444723	0.208118	0.174462			0.110032	0.121943	0.0814098	0.367127	0.0304558	0.164357	0.0644483	0.148539	0.125995	0.138881
23.016	0.216034	0.106495	0.129861	0.351928							0.0426351	0.140374	0.290442	0.118244	0.193342	0.0748078	0.149055	0.0486171			0.154544	0.0963	0.10169	0.303127	0.151549	0.177402			0.153057	0.329405	0.12317	0.125092	0.143111	0.429805	0.201237	0.16998			0.0905916	0.0449301	0.0855853	0.302035	0.0554524	0.235741	0.107084	0.158569	0.103918	0.224339
23.153	0.299587	0.0992266	0.160289	0.335052							0.0517985	0.147547	0.263708	0.115984	0.109532	0.0564531	0.141653	0.0900219			0.172863	0.146877	0.111973	0.16326	0.0975034	0.134838			0.174111	0.257498	0.0963515	0.14039	0.026306	0.415982	0.171248	0.251212			0.0617946	0.155241	0.0485517	0.283126	0.0725573	0.0771897	0.14998	0.148094	0.0984991	0.299715
23.29	0.30958	0.115741	0.148543	0.369699							0.066741	0.153205	0.261282	0.108079	0.0843463	0.0218611	0.137735	0.0782095			0.1185	0.131661	0.0979954	0.217988	0.112459	0.115852			0.271203	0.259094	0.0747723	0.0974676	0.139381	0.405339	0.0993699	0.252033			0.140568	0.236141	0.111964	0.339914	0.101511	0.246288	0.122287	0.177521	0.0582653	0.275214
23.427	0.226266	0.100549	0.130808	0.272053							0.0715416	0.121234	0.273089	0.128492	0.0784901	0.0705149	0.119883	0.0644076			0.163536	0.115969	0.123805	0.226675	0.0697382	0.0939141			0.389762	0.207635	0.0984033	0.15704	0.120143	0.192854	0.0822984	0.215258			0.0207214	0.137127			0.0553159	0.124329	0.098911	0.130091	0.0470119	0.217813
23.564	0.227039	0.137627	0.0884971	0.267222							0.0477352	0.108004	0.282827	0.151631	0.080542	0.0377095	0.158634	0.0794526			0.215578	0.114772	0.212531	0.218882	0.0716383	0.140747			0.240899	0.101342	0.145591	0.156132	0.157442	0.289939	0.0643998	0.217044			0.103222	0.129575			0.0387742	0.226063	0.104548	0.25657	0.0823074	0.40944
23.701	0.238296	0.12597	0.12925	0.288254							0.026833	0.107706	0.348092	0.137897	0.0875744	0.0628202	0.150942	0.0706248			0.208804	0.13107	0.218173	0.203312	0.106364	0.14288			0.117346	0.130627	0.209414	0.143644	0.186104	0.143928	0.0699203	0.249062			0.145484	0.127648			0.0691954	0.242539	0.08904	0.266025	0.114186	0.346939
23.838	0.242852	0.184215	0.142337	0.25312							0.0280502	0.138129	0.461375	0.0916157	0.131117	0.0694963	0.0875169	0.0217597			0.147255	0.0641439	0.203728	0.279067	0.119588	0.174508			0	0.151748	0.181359	0.206606	0.220261	0.283028	0.105979	0.259988			0.123742	0.172479			0.0331431	0.267568	0.0810938	0.184326	0.10396	0.270874
23.975	0.225043	0.202239	0.15638	0.122037							0.0387375	0.157361	0.481683	0.111358	0.135953	0.0640756	0.129027	0.0142994			0.16682	0.0520035	0.249323	0.266924	0.0646999	0.167793			0.0324765	0.135614	0.139103	0.188362	0.280726	0.0778878	0.0800033	0.267991			0.0558281	0.182919			0.0752204	0.24721	0.0679722	0.235147	0.0591179	0.342921
24.112	0.201383	0.149978	0.20037	0.11863							0.0583273	0.174413	0.434125	0.107966	0.134947	0.0675651	0.055297	0			0.179757	0.136412	0.223115	0.14913	0.138576	0.0995277			0.0405439	0.106021	0.1138	0.101971	0.0850028	0.191318	0.136277	0.232169			0.0644409	0.215059			0.00551622	0.314033	0.119667	0.243958	0.0371215	0.402609
24.249	0.309766	0.178137	0.182641	0.123643							0.0382249	0.182115	0.379035	0.111576	0.212224	0.0828461	0.0541363	0.0363071			0.101376	0.120722	0.269724	0.183104	0.158522	0.0230279			0.0708396	0.0871071	0.106628	0.098938	0.217317	0.198447	0.119422	0.178479			0.0739359	0.223732					0.119595	0.2156
24.386	0.376608	0.139788	0.222414	0.155042							0.00328902	0.177235	0.297861	0.0684395	0.289858	0.0729296	0.0686496	0.0627913			0.112543	0.139019	0.227491	0.248262	0.0752623	0.0829356			0.078727	0.025539	0.131779	0.12574	0.249709	0.133946	0.112366	0.159154			0.0866057	0.256031					0.0921173	0.220682
24.523	0.38265	0.130792	0.207115	0.153502							0.0293183	0.215111	0.29134	0.0869336	0.173848	0.0887458	0.0619733	0.100839			0.132555	0.0640716	0.400667	0.149843	0.0677029	0.0312387					0.119675	0.0927321	0.177858	0.193401	0.109094	0.194419			0.0709181	0.265911					0.0582013	0.174688
24.66	0.283624	0.0767923	0.187814	0.108135							0.019324	0.216496	0.317318	0.106241	0.159468	0.0700798	0.0859207	0.108797			0.0956081	0.137008	0.382397	0.146675	0.115423	0.111455					0.150464	0.151013	0.141344	0.264926	0.176624	0.158135			0.104323	0.305602					0.0602375	0.193527
24.797	0.217646	0.0474122	0.165553	0.132367							0.00437416	0.200622	0.323519	0.0875958	0.106735	0.118083	0.0814214	0.0698785			0.119282	0.119617	0.274416	0.227629	0.0992434	0.0782784					0.184423	0.181221	0.158227	0.163126	0.141588	0.127347			0.113262	0.336639					0.0993053	0.269004
24.934	0.211142	0.0829588	0.149842	0.167933							0.0130847	0.184802	0.324644	0.066165	0.0590343	0.132101	0.0539911	0.14958			0.135254	0.0938699	0.218838	0.314421	0.169012	0.0337814					0.223621	0.120086	0.0999225	0.0807411	0.105586	0.119045			0.0544105	0.29959
25.071	0.174835	0.122525	0.163882	0.219537							0.0349908	0.189057	0.281041	0.0654218	0.0697153	0.119712	0.0619733	0.0857942			0.0745644	0.0921246	0.192047	0.170688	0.198792	0.0675457					0.183846	0.109101	0.130154	0.0727341	0.0976551	0.131153			0.0119703	0.166548
25.208	0.145301	0.116005	0.213368	0.217146							0.0565679	0.197391	0.230027	0.0675278	0.0681879	0.136719					0.129693	0.131713	0.191781	0.152557	0.174577	0.098555					0.0494098	0.0715303	0.187281	0.190879	0.0887188	0.129261			0.0160582	0.265326
25.345	0.175081	0.0795651	0.224758	0.166997							0.0590729	0.173106	0.2001	0.0430851	0.0875024	0.198362					0.0951182	0.0901355	0.181697	0.136745	0.122867	0.0746005					0.0690104	0.0979974	0.212998	0.125061	0.192956	0.178288			0.0998836	0.362239
25.482	0.172407	0.150403	0.197368	0.15262							0.0363786	0.138642	0.159795	0.0328157	0.0384947	0.235252					0.124621	0.108515	0.234879	0.100057	0.0816972	0.0781302					0.0434561	0.131708	0.181392	0.11387	0.114686	0.225901			0.0386493	0.283846
25.619	0.131569	0.111637	0.195861	0.164161							0.0332142	0.115773	0.112641	0.0298594	0.0326324	0.27275					0.13228	0.0633703	0.191281	0.124086	0.145587	0.0440128							0.170399	0.167954	0.0533407	0.198716			0.0552075	0.294069
25.756	0.15518	0.0809433	0.19176	0.151866							0.0392747	0.101584	0.107035	0.0502976	0.0715627	0.308915					0.202701	0.168006	0.331793	0.186075	0.145678	0.0546792							0.072439	0.0241345	0.0890955	0.20045			0.0507047	0.271997
25.893	0.196198	0.093213	0.131692	0.144401							0.0636422	0.109452	0.100382	0.0311427	0.0577718	0.333607					0.155619	0.162858	0.305668	0.20498	0.134403	0.110157							0.134277	0.047721	0.0477086	0.131517			0.0895003	0.343804
26.03	0.180823	0.125115	0.0861665	0.16216							0.0957631	0.072507	0.122242	0.0139522	0.0398416	0.299077					0.154871	0.121893	0.295234	0.235755	0.171108	0.0906928							0.10699	0.144807	0.0273312	0.127788			0.0827536	0.413562
26.167	0.135896	0.110484	0.110293	0.176761							0.119558	0.0461919	0.108567	0.0319828	0.0571824	0.354258					0.105735	0.197106	0.297181	0.219201	0.138076	0.113193							0.11818	0.0307197	0.0504463	0.114828			0.067621	0.520858
26.304	0.1424	0.0347218	0.136449	0.185917							0.0796543	0.0401084	0.136699	0.0190254	0.0531906	0.461371					0.166029	0.194749	0.349548	0.267743	0.0933119	0.118271							0.108364	0.0826071
26.441	0.211573	0.0749972	0.109616	0.198998							0.0509774	0.0419977	0.155515	0.0252366	0.0221514	0.440989					0.0836765	0.0692935	0.276463	0.191306	0.185543	0.124058							0.175895	0.0235865
26.578	0.183017	0.145061	0.0823146	0.177321							0.0449596	0.049091	0.148172	0.0467622	0.0313512	0.287491					0.0956597	0.221716	0.125236	0.133728	0.164729	0.132009							0.238519	0.190662
26.715	0.193932	0.167759	0.0679541	0.159227							0.0560635	0.0547051	0.115244	0.0744967	0.0469433	0.327372					0.105571	0.241251	0.24696	0.119705	0.0672635	0.0839665							0.173736	0.169489
26.852	0.223754	0.15976	0.0422837	0.153551									0.0823805	0.0455815							0.121414	0.273807	0.149531	0.180497	0.0232054	0.153668							0.224973	0.156541
26.989	0.220553	0.147541	0.0583043	0.133706									0.0703309	0.0213086							0.1136	0.148307	0.14527	0.208922	0.060447	0.20939							0.220851	0.146999
27.126	0.25104	0.118004	0.0766043	0.159428									0.0517291	0.0315281							0.157338	0.203663	0.187753	0.232814	0.0819178	0.199242							0.143111	0.138552
27.263	0.20763	0.108928	0.0597637	0.201693									0.0422736	0.0404577							0.233613	0.179648	0.189135	0.249005	0.0888224	0.170736							0.146841	0.120672
27.4	0.128446	0.131179	0.0410693	0.155036									0.0506208	0.0430041							0.113978	0.154474	0.364108	0.217078	0.0505517	0.157779							0.15705	0.121768
27.537	0.105631	0.146954	0.0330735	0.117036									0.0394978	0.043474							0.178631	0.317805	0.250904	0.149904	0.0252692	0.117329							0.150178	0.089844
27.674	0.0858257	0.0960841	0.0264965	0.143507									0.0302956	0.0779635							0.126899	0.256706	0.255347	0.154846	0.0669886	0.093462							0.109542	0.125387
27.811	0.0749646	0.116056	0.0576781	0.210442									0.0450385	0.0885082							0.142243	0.33099	0.292205	0.141702	0.0480619	0.085891							0.139185	0.152483
27.948	0.140242	0.193546	0.0630523	0.253637									0.0397478	0.0837604							0.090373	0.21532	0.156003	0.0838662									0.269732	0.207994
28.085	0.142592	0.160049	0.0632026	0.198986									0.0338588	0.0998997							0.171135	0.188727	0.162044	0.0489072									0.198274	0.141514
28.222	0.11925	0.130329	0.0625357	0.200829									0.0328572	0.131426							0.0934333	0.160692	0.143557	0.0847609									0.186104	0.109042
28.359	0.0925634	0.0787612	0.0633636	0.243678									0.0252316	0.120697							0.185336	0.2352	0.208571	0.0930988									0.173147	0.134603
28.496	0.0727703	0.145248	0.0560905	0.261382									0.0245242	0.0614208							0.171926	0.13404	0.17103	0.129953									0.199453	0.107946
28.633	0.0769545	0.188063	0.0374836	0.25643																			0.183011	0.11593									0.237341	0.230919
28.77	0.0770385	0.111471	0.063016	0.255164																			0.166587	0.0642641									0.159012	0
28.907	0.0649897	0.103352	0.042067	0.282055																			0.128464	0.0414177									0.160583	0.0958813
29.044	0.0684546	0.13123	0.0462957	0.213368																			0.0512359	0.12871									0.143503	0.193732
29.181	0.0620528	0.0937018	0.0830531	0.2195																			0.103037	0.107152									0.115432	0.227409
29.318	0.0731304	0.129419	0.0273421	0.231394																			0.197272	0.116764									0.0816653	0.049039
29.455	0.0580902	0.130439																					0.28039	0.150798									0.0451516	0.0438804
29.592	0.0482418	0.151747																					0.219903	0.126936									0.257954	0.112883
29.729	0.0701035	0.199006																					0.22834	0									0.31135	0.07383
29.866	0.0690181	0.199491																					0.183061	0.117673									0.276014	0.115405
30.003	0.0489377	0.267845																					0.160846	0.114293									0.413432	0.079971
[truncated: 37 more columns]

## Sheet: WNT3_MYCtag
Figure 5 - figure supplement 3. WNT3 Pixel intensity profile (Normalized Pixel Intensity measured from basal to apical side of progenitor cells )
	Cell 1		Cell 2		Cell 3		Cell 4		Cell 5		Cell 6		Cell 7		Cell 8		Cell 9		Cell 10		Cell 11		Cell 12		Cell 13		Cell 14		Cell 15		Cell 16		Cell 17		Cell 18		Cell 19		Cell 20		Cell 21		Cell 22		Cell 23		Cell 24		Cell 25
	Normalized Pixel Intensity	Normalized Pixel Intensity	Normalized Pixel Intensity	Normalized Pixel Intensity	Normalized Pixel Intensity	Normalized Pixel Intensity	Normalized Pixel Intensity	Normalized Pixel Intensity	Normalized Pixel Intensity	Normalized Pixel Intensity	Normalized Pixel Intensity	Normalized Pixel Intensity	Normalized Pixel Intensity	Normalized Pixel Intensity	Normalized Pixel Intensity	Normalized Pixel Intensity	Normalized Pixel Intensity	Normalized Pixel Intensity	Normalized Pixel Intensity	Normalized Pixel Intensity	Normalized Pixel Intensity	Normalized Pixel Intensity	Normalized Pixel Intensity	Normalized Pixel Intensity	Normalized Pixel Intensity	Normalized Pixel Intensity	Normalized Pixel Intensity	Normalized Pixel Intensity	Normalized Pixel Intensity	Normalized Pixel Intensity	Normalized Pixel Intensity	Normalized Pixel Intensity	Normalized Pixel Intensity	Normalized Pixel Intensity	Normalized Pixel Intensity	Normalized Pixel Intensity	Normalized Pixel Intensity	Normalized Pixel Intensity	Normalized Pixel Intensity	Normalized Pixel Intensity	Normalized Pixel Intensity	Normalized Pixel Intensity	Normalized Pixel Intensity	Normalized Pixel Intensity	Normalized Pixel Intensity	Normalized Pixel Intensity	Normalized Pixel Intensity	Normalized Pixel Intensity	Normalized Pixel Intensity
(basal to apical distance um)	MYC - Tag	DAPI	MYC - Tag	DAPI	MYC - Tag	DAPI	MYC - Tag	DAPI	MYC - Tag	DAPI	MYC - Tag	DAPI	MYC - Tag	DAPI	MYC - Tag	DAPI	MYC - Tag	DAPI	MYC - Tag	DAPI	MYC - Tag	DAPI	MYC - Tag	DAPI	MYC - Tag	DAPI	MYC - Tag	DAPI	MYC - Tag	DAPI	MYC - Tag	DAPI	MYC - Tag	DAPI	MYC - Tag	DAPI	MYC - Tag	DAPI	MYC - Tag	DAPI	MYC - Tag	DAPI	MYC - Tag	DAPI	MYC - Tag	DAPI	MYC - Tag	DAPI	MYC - Tag
0	0.0731527	0.396141	0.104133	0.0451433	0.0799597	0.233534	0.037913	0.22971	0.0101126	0.0311701	0	0.234439	0.161453	0.275797	0.111484	0.312982	0.0237729	0.153842	0.0672839	0.102476	0.0583766	0.290101	0.0101738	0.152366	0.00953535	0.293753	0.0308625	0.0274398	0.0376199	0.356654	0.0274054	0.338944	0	0.128677	0.0321604	0.0179431	0.0473078	0.110827	0.0630185	0.0941572	0.0380743	0.136817	0.0529943	0.150429	0.0668051	0.28497	0.0232711	0.180272	0.00760735
0.137	0.10278	0.260021	0.0678919	0.07078	0.0992833	0.155971	0.0384666	0.196692	0.0557548	0.0126778	0.000340233	0.206343	0.0642747	0.182898	0.0811821	0.138189	0.11449	0.139048	0.0203927	0.111067	0.0315425	0.324169	0.00532098	0.078667	0.0294127	0.303237	0.0335922	0.0176989	0.0155635	0.284519	0.0151754	0.275305	0.0501105	0.12559	0.0279165	0.0128334	0.0135905	0.107236	0.0248331	0.0721472	0.0624755	0.164195	0.0675037	0.0801387	0.0249283	0.25898	0.0165319	0.187295	0
0.274	0.0744759	0.199736	0.0944775	0.0154724	0.114795	0.227451	0.0230066	0.181005	0.075737	0.0258059	0.0292452	0.243657	0.0245884	0.220589	0.104037	0.238622	0.0429096	0.0460535	0.0851539	0.115638	0.0625402	0.335846	0.0026927	0.0458202	0.00376604	0.332363	0.0661597	0.00847053	0.0307206	0.23697	0.0457435	0.28156	0.0467017	0.0780119	0.0331448	0.0180798	0.0244378	0.0918456	0.0400071	0.0292708	0.0563974	0.150718	0.0585108	0.0801868	0.0662472	0.315104	0	0.150648	0.00045417
0.411	0.212679	0.219658	0.0741201	0.0142747	0.11255	0.163841	0.0130933	0.20754	0.0359215	0.035386	0.0350268	0.218533	0.0801896	0.193732	0.13407	0.13801	0.0897888	0.0703088	0.0553216	0.0946314	0.0572239	0.325573	0.00336695	0.0186564	0.0108801	0.358253	0.0671041	0	0.00754785	0.224089	0.0342231	0.32183	0.0326926	0.102939	0.0106595	0.0110988	0.0149019	0.10359	0.0346705	0.0998472	0.0200663	0.158364	0.0382434	0.110486	0.027731	0.225592	0.00121459	0.140983	0.00551885
0.548	0.249425	0.130566	0.0732226	0.00346523	0.131214	0.184245	0.0503956	0.173428	0.104168	0.00388947	0.0605309	0.258969	0	0.10414	0.097613	0.0343948	0.121486	0.0722893	0.0339006	0.0705393	0.0152379	0.34778	0.0279684	0.0259149	0.00319769	0.402217	0.0607863	0.0200682	0.00924962	0.221631	0.0381782	0.262156	0.0403558	0.048377	0.0260472	0.0121799	0.0494771	0.0681067	0.052976	0.119409	0.0191105	0.213846	0.0683484	0.120842	0.0376046	0.158421	0.00332746	0.158788	0.015268
0.685	0.609081	0.0912384	0.110538	0	0.134292	0.135744	0.00738507	0.183281	0.0650522	0	0.00782145	0.193111	0.0726051	0.0766537	0.138666	0.111701	0.108013	0.0216623	0.0311479	0.0589274	0	0.337916	0.0261883	0.0152942	0.00689175	0.449632	0.0598908	0.0342636	0.0270538	0.265238	0.0302991	0.29418	0.0491074	0.0614538	0.0303103	0.00887163	0.0170747	0.079285	0.0439917	0.084704	0.0684706	0.213175	0.0474681	0.0851454	0.0229052	0.147317	0.00617414	0.14843	0.0115727
0.822	0.678426	0.076281	0.0990671	0.00348429	0.141569	0.0828287	0.0344345	0.173395	0.0703542	0.018447	0.0176835	0.255399	0.121003	0.0952496	0.114369	0.130084	0.146086	0.0493242	0	0.0541117	0.0293346	0.352176	0.0101073	0.0211471	0.0251883	0.469807	0.0680915	0.0456008	0.0497667	0.227857	0.0576536	0.26388	0.0383192	0.0602824	0.0404715	0.00318743	0.00613517	0.0887706	0.0260981	0.00771158	0.0549397	0.222213	0.0491423	0.0723651	0.0137965	0.210194	0.0204139	0.139553	0.0097767
0.959	0.590542	0.0335464	0.144324	0.0206008	0.20427	0.234371	0.0181025	0.15831	0.0685979	0.00789378	0.0516896	0.303565	0.0862897	0.0903687	0.105929	0.214791	0.206999	0.0581284	0.0586555	0.0393615	0.0427831	0.310888	0.00865357	0.0103318	0.0222118	0.440888	0.0889564	0.0508467	0.035295	0.197239	0.0406201	0.309887	0.024493	0.0860638	0.0464675	0	0.02667	0.0526764	0.0822366	0.0205531	0.0371464	0.236096	0.0577692	0.0164023	0.0150687	0.113027	0.030856	0.122276	0.0204428
1.096	0.789153	0	0.223911	0.0824279	0.276807	0.184204	0.0918976	0.148575	0.0535253	0.000154128	0.0809347	0.235478	0.0475394	0.0720539	0.127923	0.220563	0.317061	0.087626	0.0723358	0.111066	0.0934921	0.333478	0.0343974	0.00364873	0.0108926	0.442897	0.0760368	0.0391399	0.104106	0.156258	0.0246747	0.282467	0.0552015	0.130275	0.0405414	0.000574462	0.0155345	0.032348	0.0493413	0.0356251	0.0503805	0.239496	0.0788662	0.040257	0.0326364	0.101218	0.0136852	0.114032	0.0233984
1.233	0.719475	0.0578378	0.290347	0.0657278	0.245736	0.171854	0.0747188	0.176229	0.0341486	0.00900894	0.0142827	0.299849	0.0537794	0.1896	0.128014	0.271657	0.459044	0.0568078	0.0337793	0.142117	0.0408275	0.246183	0.0358125	0.0120653	0.00608772	0.420612	0.0705658	0.0630459	0.122141	0.136951	0.0499728	0.21912	0.0364319	0.132678	0.0325573	0.00722261	0.0289404	0.0330792	0.0379657	0.0592866	0.0663066	0.295154	0.157262	0.0545013	0.0342412	0.126155	0.0216369	0.138624	0.0241587
1.37	0.713849	0.0665766	0.374068	0.0631908	0.2649	0.135556	0.0809083	0.168031	0.0314362	0.0556735	0.0870558	0.149403	0.00989737	0.152183	0.184993	0.401162	0.547622	0.0891776	0.104205	0.133524	0.119948	0.331053	0.0434053	0.0149039	0	0.348684	0.0793377	0.0710897	0.129893	0.112707	0.0123335	0.176008	0.0271341	0.157288	0.0519511	0.0247911	0.0319313	0.0346468	0.0352659	0.0900333	0.0227479	0.269698	0.182745	0.0873054	0.040052	0.106297	0.00518729	0.139335	0.0207387
1.507	0.704742	0.0818346	0.529346	0.0552668	0.419862	0.0853404	0.288536	0.143127	0.123434	0.0404843	0.120042	0.185083	0.0589463	0.140689	0.219424	0.390916	0.499685	0.0802112	0.219862	0.0684329	0.0436663	0.350887	0.0721467	0.00491765	0.010168	0.308108	0.0998438	0.0735581	0.148861	0.10004	0.0278477	0.0864125	0.0591106	0.190788	0.0666866	0.011506	0.0126297	0.0394497	0.0323352	0.0427388	0.0286077	0.241117	0.174722	0.0269217	0.115595	0.0346233	0.0098432	0.174151	0.0325575
1.644	0.634569	0.0658388	0.863454	0.0868785	0.438406	0.0963495	0.236938	0.12464	0.121735	0.0484446	0.142146	0.146579	0.102859	0.0925719	0.381049	0.405569	0.492228	0.107314	0.27991	0.0742204	0.0299253	0.273478	0.0893443	0.0066972	0.00952745	0.253869	0.134489	0.0902017	0.174112	0.0597168	0.0151038	0.078079	0.0452049	0.182533	0.0858391	0.0146776	0.054686	0.00468769	0.0714134	0.072935	0.0398341	0.164083	0.205641	0.0564024	0.0575218	0.031028	0.0254409	0.179039	0.0491106
1.781	0.54817	0.0938316	1.22014	0.0790688	0.457623	0.100529	0.270809	0.118379	0.118072	0.0524549	0.250286	0.137066	0.0802234	0.075972	0.410667	0.350114	0.443421	0.0541775	0.436135	0.103579	0.0340487	0.152602	0.102428	0	0.0197589	0.211348	0.136143	0.0971835	0.194068	0.0676672	0.0259387	0.0508702	0.0348087	0.167979	0.0973064	0.042434	0.0563265	0.0397402	0.00288504	0.00756921	0.074814	0.0987793	0.263557	0.0360256	0.0734593	0.0631201	0.0572057	0.178722	0.0517393
1.918	0.443239	0.149377	1.30531	0.0553539	0.621853	0.0644106	0.459477	0.123444	0.144598	0.0995154	0.262188	0.0685315	0.119886	0.0666213	0.400469	0.287193	0.283021	0.106651	0.651226	0.0447485	0.0527391	0.0915277	0.123944	0.0153001	0.0185794	0.129484	0.117058	0.0873485	0.207042	0.0107042	0.013876	0.0730385	0.0590237	0.20104	0.113275	0.0511067	0.0512285	0.0220962	0.0583937	0.029603	0.163042	0.125627	0.210423	0.0534869	0.151921	0.0223479	0.0663088	0.183594	0.0941302
2.055	0.397386	0.114346	1.24313	0.101738	0.714606	0.0284725	0.595222	0.127568	0.131679	0.154989	0.201657	0.126511	0.191719	0.0924208	0.404961	0.28093	0.246792	0.0943495	0.755138	0.0948687	0.101859	0.11056	0.142649	0.0306734	0.0257077	0.0892939	0.120347	0.0787671	0.231983	0	0.0219767	0.129458	0.0443855	0.193273	0.108073	0.0536416	0.0276353	0.0241095	0.0755893	0.0019884	0.196038	0.131228	0.0990724	0.0350592	0.167871	0.0576614	0.0764894	0.196161	0.129862
2.192	0.360151	0.133156	1.00363	0.0844068	0.934595	0.05817	0.41081	0.104567	0.104442	0.201781	0.187374	0.0602057	0.222004	0.0240988	0.428497	0.307998	0.264313	0.125081	0.741189	0	0.0448764	0.0459027	0.154315	0.0413259	0.0125487	0.0738898	0.0876934	0.0841156	0.247944	0.0112804	0	0.0637785	0.0576244	0.174093	0.142879	0.0841234	0.0470363	0	0.0765105	0.0095766	0.167141	0.0648892	0.0990298	0.0538646	0.0956913	0.137142	0.0734508	0.19221	0.155373
2.329	0.452834	0.101237	0.748755	0.112308	0.91787	0.0654966	0.365966	0.0759536	0.0631234	0.20105	0.202677	0.101831	0.359646	0.0234136	0.503928	0.306488	0.240381	0.185805	0.579759	0.0109966	0.0771989	0.0660879	0.152786	0.0470408	0.0272177	0.0571324	0.0786746	0.087288	0.249606	0.00539032	0.0223328	0.0825674	0.0434185	0.144255	0.125469	0.10116	0.110847	0.0356034	0.0860584	0.0139046	0.176808	0.0553923	0.0829865	0.0772926	0.140447	0.114386	0.109684	0.20196	0.22755
2.466	0.376207	0.0993123	0.656426	0.130228	0.781173	0.041193	0.324747	0.0534702	0.0945263	0.179209	0.310138	0.0554495	0.428027	0.0160377	0.458677	0.269114	0.245602	0.175992	0.628272	0.0499378	0.114935	0.0134114	0.139973	0.0715323	0.0281744	0.0272608	0.0744293	0.115319	0.216665	0.0379822	0.0411736	0.111898	0.0245201	0.189857	0.139941	0.11876	0.161388	0.0489853	0.154016	0.0510151	0.251962	0.0835409	0.0956786	0	0.124911	0.0566258	0.142539	0.177308	0.261048
2.603	0.341117	0.092869	0.675594	0.128273	0.603909	0.0665182	0.269978	0.035016	0.170776	0.184458	0.390732	0.0321099	0.390048	0.00171833	0.41544	0.259936	0.123833	0.159043	0.588624	0.00843248	0.193723	0.0107972	0.129396	0.100266	0.0315536	0.0347212	0.0906413	0.11607	0.173872	0.0428625	0.0431775	0.0750355	0.0380141	0.144009	0.15497	0.118525	0.111397	0.0486348	0.212423	0.0777944	0.222286	0.0518483	0.166974	0.0140883	0.145055	0.0343023	0.162478	0.133122	0.265509
2.74	0.421551	0.116198	0.564159	0.206566	0.639864	0.0781296	0.239278	0.0397271	0.148202	0.173754	0.330201	0	0.335451	0	0.326971	0.130804	0.0950247	0.169261	0.599737	0.06173	0.192971	0.0824907	0.152668	0.162173	0.04584	0.0288433	0.0819383	0.116942	0.218578	0.0297105	0.0396845	0.0718	0.0200319	0.124375	0.121105	0.120275	0.154935	0.100675	0.180837	0	0.228153	0.0471832	0.137922	0.0448503	0.126755	0	0.155868	0.106329	0.255529
2.877	0.451348	0.124417	0.520547	0.207938	0.659614	0.0525522	0.215597	0.0199529	0.229316	0.196655	0.457045	0.0535177	0.346597	0.0404141	0.19484	0.0948602	0.0732183	0.225017	0.630074	0.0797575	0.296265	0.0377825	0.180628	0.19953	0.0423922	0.0119169	0.0867118	0.123968	0.266166	0.102309	0.0669899	0.053232	0.0170718	0.121758	0.103514	0.106875	0.167418	0.181483	0.226976	0.00190298	0.183091	0	0.120425	0.0328942	0.138266	0.061449	0.200866	0.09404	0.242941
3.014	0.423872	0.175815	0.52872	0.225131	0.580621	0.042943	0.220789	0.00478767	0.264396	0.203059	0.346864	0.111791	0.289846	0.0238282	0.170228	0.103071	0.0459005	0.155017	0.536796	0.0326355	0.42946	0.00890079	0.175627	0.26292	0.0627817	0.0145553	0.12471	0.134697	0.181461	0.147211	0.0876388	0.0548929	0.0169881	0.157272	0.125625	0.114595	0.120846	0.233798	0.175679	0.0294511	0.19874	0.0307064	0.0775837	0.0413293	0.172568	0.0151046	0.23268	0.0804718	0.245333
3.151	0.310329	0.154487	0.441525	0.241562	0.531485	0.0817787	0.21413	0.0381591	0.234503	0.202416	0.391072	0.0429625	0.283008	0.010693	0.224315	0.0234078	0.070358	0.163723	0.429569	0.066761	0.425222	0.0136943	0.183198	0.367345	0.0456039	0	0.114896	0.161291	0.177937	0.192756	0.130608	0.0352832	0.0639999	0.176808	0.094416	0.110556	0.132254	0.295199	0.275017	0.0846613	0.174418	0.0452558	0.0858695	0.113631	0.170518	0.0448872	0.232559	0.0337585	0.229922
3.288	0.288648	0.25069	0.26946	0.30227	0.51644	0.0485531	0.278586	0.0398292	0.276891	0.220929	0.253007	0.0735885	0.242553	0.00464195	0.157717	0.0414013	0.178237	0.16858	0.330231	0.107906	0.535277	0.0486636	0.173035	0.4639	0.10225	0.00402559	0.115843	0.202764	0.136341	0.168462	0.123941	0.0409957	0.0496963	0.173622	0.120364	0.11721	0.110154	0.27148	0.201453	0.0909113	0.175251	0.0507901	0.153174	0.163788	0.126042	0.0547564	0.238251	0.00966595	0.232614
3.425	0.330687	0.211438	0.160425	0.326448	0.641137	0.0687005	0.270961	0	0.299913	0.224825	0.188055	0.080721	0.235581	0.0165016	0.208899	0.0913878	0.116978	0.157662	0.340596	0.056049	0.616324	0.109691	0.161695	0.554471	0.123803	0.0131889	0.0789617	0.21686	0.140091	0.209305	0.168058	0.077719	0.0343626	0.150583	0.0910132	0.133662	0.105581	0.300994	0.236847	0.117358	0.187157	0.110658	0.147515	0.189752	0.196769	0.0708343	0.216922	0.00859589	0.200795
3.562	0.279378	0.320379	0.218988	0.437409	0.643476	0.0928445	0.217311	0.0400297	0.252148	0.240485	0.209479	0.092319	0.28045	0.0495153	0.164721	0	0.0868565	0.176948	0.233236	0.0295181	0.721504	0.0934766	0.116501	0.584099	0.127318	0.0109476	0.0997462	0.290907	0.145428	0.272163	0.236501	0.0121499	0.050765	0.210657	0.0948741	0.179733	0.0692578	0.249339	0.199523	0.112271	0.137341	0.0683521	0.073538	0.188694	0.24325	0.0955953	0.229496	0	0.166218
3.699	0.307519	0.380661	0.186602	0.371882	0.577369	0.130515	0.235904	0.0674467	0.248626	0.274656	0.16561	0.0509909	0.318255	0.0688281	0.271952	0.0777271	0.0661363	0.154616	0.161762	0.0970955	0.74441	0.0465576	0.121693	0.607919	0.15368	0.0299424	0.108576	0.298788	0.185078	0.278481	0.319629	0.0371841	0.0495257	0.162149	0.125487	0.193745	0.0598284	0.294648	0.170208	0.149567	0.115038	0.0391452	0.049502	0.312924	0.237853	0.0924362	0.255038	0.0178956	0.155276
3.836	0.245448	0.364222	0.164022	0.393215	0.560437	0.151349	0.187185	0.0671659	0.33954	0.317045	0.353665	0.192813	0.32288	0.0862538	0.338621	0.045838	0.121098	0.129193	0.304639	0.133455	0.600702	0.0942834	0.124914	0.59544	0.185047	0.0839636	0.0637027	0.311358	0.158056	0.292781	0.262313	0.066918	0.0448202	0.160403	0.0896825	0.21074	0.121981	0.28363	0.215145	0.159532	0.101697	0.0848108	0.0509799	0.208059	0.209694	0.0633618	0.248486	0.0244912	0.140554
3.973	0.22013	0.257428	0.16959	0.379284	0.576083	0.197061	0.163311	0.0840777	0.342653	0.294877	0.213899	0.0645173	0.296299	0.0842719	0.268448	0.147001	0.118366	0.119527	0.350253	0.0981504	0.513782	0.092827	0.115075	0.571075	0.208502	0.0812676	0.0402602	0.339697	0.123154	0.276227	0.282229	0.0227972	0.0531937	0.196097	0.092517	0.259368	0.108169	0.236287	0.176344	0.239424	0.0894438	0.115089	0.0616657	0.339574	0.249302	0.118621	0.200308	0.0345194	0.16748
4.11	0.197614	0.287349	0.161615	0.363267	0.501814	0.0889998	0.168967	0.0834943	0.357523	0.323028	0.240764	0.133052	0.262654	0.0569895	0.24818	0.111254	0.0817995	0.1447	0.376592	0.10957	0.56015	0.114463	0.0943303	0.515628	0.205182	0.129246	0.0438797	0.3674	0.130339	0.285952	0.365219	0.0715648	0.0464786	0.178888	0.0891859	0.289021	0.07046	0.319704	0.15099	0.271604	0.0735517	0.106943	0.0527012	0.307151	0.227865	0.168689	0.189787	0.0456384	0.171692
4.247	0.143828	0.358592	0.161853	0.446623	0.519805	0.0467928	0.118779	0.107236	0.366453	0.342863	0.265929	0.167244	0.167463	0.0359057	0.363756	0.0852752	0.0269629	0.153716	0.419344	0.129747	0.706622	0.176083	0.111227	0.469523	0.162519	0.164896	0.0310175	0.363504	0.105392	0.25817	0.331914	0	0.0662505	0.169708	0.0640987	0.334893	0.0703748	0.287572	0.192554	0.311705	0.0715371	0.195375	0.0442919	0.364606	0.233975	0.209744	0.17508	0.0229506	0.179581
4.384	0.137042	0.283942	0.170087	0.493868	0.597992	0.0834386	0.0813363	0.138886	0.340838	0.356737	0.145207	0.21645	0.190435	0.116882	0.188691	0.0655743	0.0816431	0.259393	0.437329	0.136529	0.621571	0.188755	0.123823	0.451931	0.175693	0.238754	0.0631401	0.395013	0.134573	0.253508	0.405767	0.0494684	0.0642082	0.177049	0.070829	0.333003	0.0774957	0.283204	0.226881	0.246135	0.066579	0.195375	0.0189698	0.277414	0.159345	0.216131	0.152894	0.0162399	0.147096
4.521	0.266139	0.370665	0.122437	0.472047	0.649452	0.0543484	0.0951195	0.134478	0.299822	0.357348	0.132284	0.236521	0.196414	0.0952671	0.140947	0.0393363	0.0929952	0.254253	0.303585	0.264557	0.430097	0.203298	0.113209	0.445114	0.191578	0.289232	0.0407768	0.400765	0.101723	0.294627	0.325242	0.0200706	0.0557125	0.179353	0.0764106	0.347618	0.042924	0.326275	0.159646	0.305417	0.0741689	0.187075	0.0667994	0.355129	0.19162	0.18843	0.136358	0.0673673	0.122311
4.658	0.167661	0.358149	0.113325	0.527799	0.596592	0.0647451	0.14608	0.182537	0.349638	0.357849	0.111201	0.162488	0.221946	0.112117	0.160973	0.14429	0.107987	0.199012	0.235829	0.225137	0.520612	0.295916	0.0945816	0.431699	0.207632	0.302892	0.0123542	0.391666	0.0780149	0.272693	0.287401	0.0125387	0.088926	0.193793	0.0783131	0.370094	0.0372671	0.294768	0.260969	0.315259	0.0840493	0.18418	0.0667097	0.29868	0.134069	0.254174	0.130399	0.0842756	0.102529
4.795	0.177426	0.431688	0.08829	0.479871	0.627677	0.0597295	0.141338	0.210369	0.269573	0.369472	0.0914773	0.269524	0.24313	0.151951	0.0752377	0.151015	0.114799	0.290558	0.244611	0.204131	0.625672	0.305985	0.0763103	0.440484	0.216821	0.324281	0.034307	0.357542	0.103393	0.301644	0.264259	0.035864	0.128088	0.125185	0.053628	0.386422	0.0550347	0.398574	0.0716926	0.28968	0.0401806	0.234124	0.0590899	0.389465	0.148363	0.174462	0.134604	0.100015	0.0879731
4.932	0.217151	0.372442	0.0956606	0.440675	0.596652	0.133536	0.125063	0.258071	0.185035	0.427754	0.0479486	0.137661	0.251481	0.183426	0.0463444	0.0879508	0.112432	0.261794	0.319201	0.203048	0.479848	0.284296	0.0773195	0.490009	0.171492	0.381684	0.0469769	0.396648	0.0822531	0.273147	0.278025	0.0389699	0.115995	0.129323	0.0424124	0.370196	0.0709764	0.334604	0.106811	0.318533	0.0601352	0.218354	0.0634145	0.369448	0.0818485	0.123626	0.164562	0.113127	0.0839286
5.069	0.0807665	0.350297	0.086631	0.463146	0.533065	0.169198	0.099058	0.288372	0.206645	0.424136	0.136365	0.30639	0.216815	0.147643	0.0530276	0.12662	0.151608	0.256607	0.326028	0.214213	0.377931	0.39778	0.0612428	0.501512	0.163411	0.430621	0.018293	0.406152	0.0630386	0.41354	0.251485	0.0710656	0.139467	0.129865	0.0214152	0.408709	0.047047	0.342497	0.154924	0.233255	0.0954738	0.246282	0.0451392	0.347289	0.0859872	0.270392	0.200449	0.131812	0.102262
5.206	0.199439	0.42369	0.133098	0.458788	0.491525	0.201086	0.0786627	0.202278	0.240391	0.373791	0.11086	0.305648	0.222822	0.179553	0.0266179	0.138965	0	0.223717	0.312731	0.204029	0.480863	0.516303	0.0555933	0.497013	0.123355	0.475988	0.0370281	0.424661	0.0674409	0.49565	0.19799	0.135468	0.155754	0.0805955	0.0295532	0.449889	0.028039	0.416488	0.122895	0.208431	0.109134	0.297495	0.0371243	0.370547	0.111681	0.199316	0.151848	0.0939425	0.101414
5.343	0.109729	0.458424	0.245845	0.454367	0.422833	0.17609	0.0868001	0.243734	0.195077	0.426294	0.157109	0.351882	0.21671	0.210079	0.096298	0.176231	0.0191108	0.219078	0.247823	0.188617	0.468223	0.504568	0.0380371	0.504448	0.100089	0.510976	0.0399243	0.413357	0.0661885	0.587076	0.211468	0.16862	0.141559	0.0701626	0.0346277	0.484153	0.0470762	0.366827	0.146076	0.245442	0.0795154	0.238892	0.057731	0.432753	0.0846085	0.218377	0.13437	0.0975514	0.10883
5.48	0.150112	0.399399	0.18085	0.455442	0.492278	0.289303	0.147407	0.247486	0.0781683	0.402803	0.10848	0.27324	0.212151	0.165571	0.0885684	0.143428	0.0956283	0.342573	0.226638	0.230297	0.51786	0.483288	0.0164139	0.491399	0.0788514	0.488542	0.0563602	0.417036	0.0278551	0.682766	0.202949	0.177289	0.20939	0.0910066	0.0141707	0.469917	0.0271633	0.29574	0.0910796	0.229943	0.0505315	0.248569	0.0585393	0.39975	0.0700707	0.257529	0.130106	0.0830933	0.0880763
5.617	0.0595807	0.508489	0.0767855	0.453028	0.497876	0.354483	0.144764	0.226125	0.115499	0.380956	0.143847	0.294795	0.254571	0.156048	0.0369445	0.114958	0.10999	0.27163	0.131879	0.214964	0.614793	0.505275	0.015293	0.475001	0.0693351	0.48372	0.00685737	0.388141	0.054341	0.759363	0.237707	0.200903	0.245154	0.0762713	0.00395884	0.48874	0.0483911	0.307404	0.164073	0.244768	0.0936599	0.254567	0.044053	0.432573	0.0887891	0.259706	0.110314	0.0449493	0.0845479
5.754	0.221121	0.529151	0.0452703	0.489382	0.505339	0.283104	0.0820049	0.217556	0.142434	0.405297	0.0486291	0.335976	0.269592	0.192723	0.0563184	0.14871	0.00243174	0.209459	0.173808	0.144892	0.374266	0.485855	0.023079	0.458985	0.0562611	0.44539	0.0357249	0.419602	0.033609	0.710885	0.138384	0.296086	0.301943	0.0694346	0.0397108	0.532305	0.0463363	0.307354	0.126537	0.307552	0.053385	0.311905	0.0340387	0.413457	0.0892039	0.288022	0.121674	0.0404101	0.0917957
5.891	0.112708	0.699413	0.0626291	0.398496	0.465805	0.385794	0.166094	0.247307	0.198086	0.469378	0.0996382	0.376709	0.316387	0.285345	0.109745	0.179313	0.0390727	0.215873	0.168475	0.177239	0.342999	0.495861	0.0279491	0.44685	0.0779005	0.404857	0.0803309	0.373994	0.0427085	0.673791	0.113166	0.317256	0.39769	0.0700695	0.01412	0.506041	0.017418	0.28972	0.0508674	0.305046	0.0495233	0.314855	0.0922494	0.447619	0.075981	0.347471	0.124442	0.0593374	0.0978719
6.028	0.160047	0.649054	0.100243	0.427718	0.431549	0.372727	0.0872174	0.279588	0.0678437	0.358408	0.10678	0.425768	0.291226	0.255244	0.115725	0.16713	0.229378	0.262503	0.246667	0.170808	0.325897	0.545216	0.0371846	0.43056	0.0661976	0.372234	0.0484178	0.417288	0.0616545	0.714919	0.111341	0.32184	0.381607	0.0553068	0.0315711	0.469328	0.0521299	0.311496	0.0547374	0.282899	0.0273533	0.320763	0.0405669	0.373101	0.0590848	0.369429	0.125695	0.0652912	0.0825351
6.165	0.208872	0.657125	0.0688234	0.455334	0.432575	0.334063	0.0764116	0.209046	0.0781177	0.433375	0.1095	0.605349	0.263341	0.286838	0.124968	0.124306	0.248166	0.239252	0.124605	0.190611	0.274173	0.446501	0.0375646	0.445534	0.0406942	0.362642	0.0313878	0.480813	0.0728894	0.671246	0.0959827	0.336755	0.363461	0.0319612	0.0307912	0.494858	0.0463585	0.309838	0.0969462	0.320992	0.0283222	0.276759	0.0147847	0.272443	0.0921263	0.356569	0.119299	0.0470382	0.0679586
6.302	0.157068	0.639944	0.0965309	0.507873	0.441384	0.394099	0.101821	0.215901	0.125595	0.441795	0.148607	0.470365	0.315004	0.352384	0.138349	0.120918	0.231221	0.216464	0.238601	0.124443	0.211083	0.376269	0.0262463	0.420991	0.0654609	0.36243	0.0149146	0.506725	0	0.601161	0.115698	0.367339	0.347132	0.0223165	0.044273	0.494895	0.0363231	0.35661	0.0898922	0.311164	0.0755193	0.303003	0.0191057	0.263484	0.123532	0.324907	0.132206	0.0751589	0.0615538
6.439	0.137205	0.57566	0.0722367	0.502317	0.465785	0.40299	0.0651871	0.278771	0.098733	0.459193	0.0710735	0.480476	0.330153	0.419652	0.101701	0.140306	0.183006	0.22154	0.186907	0.0990025	0.216026	0.318134	0.01939	0.411486	0.0613685	0.372702	0.0284542	0.532148	0.0483484	0.509286	0.0671882	0.365582	0.316974	0.0194756	0.0212193	0.488498	0.0588409	0.35051	0.120275	0.245912	0.0689821	0.307497	0.0486964	0.199109	0.109937	0.37849	0.141598	0.111437	0.0614695
6.576	0.116352	0.608988	0.0663076	0.507726	0.369647	0.507127	0.096389	0.282651	0.0845974	0.475029	0.0659723	0.518976	0.247326	0.23695	0.084747	0.190141	0.198476	0.225972	0.140859	0.159376	0.183618	0.374472	0.0185654	0.39933	0.0663624	0.336512	0.0318585	0.55161	0.0281412	0.417335	0.125773	0.352779	0.239586	0.00131917	0.021291	0.468579	0.0321052	0.392233	0.0386396	0.278224	0.0196857	0.343309	0.0470755	0.184829	0.0461369	0.395774	0.114464	0.133547	0.0505333
6.713	0.0590854	0.508786	0.119622	0.522066	0.371786	0.506628	0.0369208	0.252915	0.0999875	0.580123	0.0618911	0.550642	0.335719	0.332804	0.0651803	0.149438	0.22379	0.191616	0.128781	0.23284	0.177183	0.320753	0.026854	0.395091	0.0487472	0.376712	0.0294359	0.582862	0.0605776	0.385727	0.145655	0.419241	0.195968	0	0.022641	0.494812	0.0248423	0.434953	0.0271554	0.277769	0.0457751	0.368166	0.0439278	0.159791	0.14169	0.421192	0.102732	0.126893	0.0326228
6.85	0.0974803	0.485901	0.0822046	0.484387	0.387704	0.432783	0.100264	0.234005	0.0672382	0.559243	0.070393	0.621406	0.355669	0.320695	0.0553057	0.17212	0.233609	0.179283	0.0986681	0.233329	0.144987	0.344312	0.0263172	0.386103	0.054554	0.415278	0.0484867	0.603858	0.116369	0.444587	0.0844942	0.355875	0.289425	0.0101155	0.0307143	0.485079	0.0690502	0.455687	0.0883954	0.207515	0.0512325	0.349506	0.0252848	0.21182	0.119916	0.42386	0.105458	0.144957	0.0287314
6.987	0.112545	0.425172	0.0243078	0.461431	0.390903	0.408912	0.0934747	0.307049	0.0796389	0.549291	0.136706	0.541277	0.357264	0.445775	0.0499657	0.149624	0.20175	0.186598	0.0989364	0.217069	0.151353	0.347345	0.023764	0.382095	0.0490129	0.405382	0.0674083	0.627023	0.0362227	0.407926	0.0626684	0.405982	0.272407	0.0323389	0.0193046	0.507755	0.0604609	0.436416	0.0360846	0.23821	0.0593243	0.380946	0.0250921	0.159374	0.104815	0.363936	0.0837916	0.166542	0.0345255
7.124	0.0855642	0.463386	0.0567953	0.601913	0.363144	0.353189	0.0565379	0.235015	0.098672	0.513733	0.0176835	0.574727	0.322142	0.484256	0.0836576	0.126468	0.15781	0.167548	0.105706	0.264145	0.17673	0.31115	0.0206934	0.397454	0.0569247	0.39961	0.0533951	0.624193	0.0457619	0.380449	0.0650309	0.466131	0.283091	0.0428212	0.0157864	0.525792	0.0356168	0.40274	0.0285885	0.274936	0.060542	0.436937	0.0452316	0.205801	0.131892	0.375254	0.079005	0.170005	0.0341797
7.261	0.0392229	0.508191	0.0896159	0.727522	0.345046	0.359769	0	0.262935	0.0718746	0.53448	0.0414873	0.599998	0.312196	0.363646	0.111637	0.153514	0.10394	0.201617	0.0870443	0.17994	0.130013	0.274588	0.0406975	0.387248	0.0726579	0.471632	0.0383542	0.626843	0.0405548	0.431583	0.0630521	0.462219	0.217234	0.0655975	0.0188395	0.546716	0.0526862	0.345627	0.0830725	0.242381	0.0488617	0.422798	0.0343336	0.264197	0.139602	0.460844	0.0730291	0.161771	0.042969
7.398	0	0.432208	0.0656549	0.554938	0.268145	0.393474	0.0683732	0.3391	0.080572	0.47919	0.133305	0.601335	0.171544	0.562716	0.0257649	0.0805327	0.103076	0.133527	0.103599	0.268842	0.150487	0.35512	0.0438455	0.416728	0.0630951	0.462834	0.0109305	0.582264	0.027131	0.541185	0.0476197	0.458062	0.199767	0.12588	0.0316183	0.54821	0.0615895	0.361623	0.10954	0.357969	0.0691986	0.407942	0.0412828	0.317536	0.128508	0.483342	0.0869293	0.185778	0.0601104
7.535	0.0863921	0.631722	0.0840268	0.677685	0.311996	0.407079	0.108433	0.225728	0.133289	0.467915	0.0618911	0.607579	0.225584	0.456412	0.0432825	0.111896	0.125879	0.156833	0.141734	0.207947	0.136361	0.349745	0.0371696	0.419142	0.0596641	0.488514	0.0549422	0.543658	0.0526892	0.525977	0.0541305	0.532992	0.130428	0.172199	0.0226322	0.573254	0.0609427	0.35059	0.0745096	0.386125	0.0699824	0.473282	0.046555	0.311512	0.0781865	0.344665	0.0870116	0.183805	0.0535886
7.672	0.107082	0.64224	0.064533	0.639309	0.263221	0.369294	0.0911765	0.226027	0.0875385	0.455863	0.0581509	0.604755	0.165057	0.410509	0.177068	0.12018	0.161054	0.147714	0.170212	0.229662	0.160121	0.361317	0.033444	0.447949	0.0427639	0.474658	0.0463282	0.566649	0.0468985	0.583608	0.0562749	0.706451	0.167622	0.243237	0.0274339	0.567344	0.0225258	0.275011	0.084341	0.406047	0.0983413	0.43723	0.0501228	0.302554	0.045152	0.435846	0.0411715	0.185272	0.0490005
7.809	0.0923501	0.640461	0.192973	0.60108	0.331999	0.424303	0.0853426	0.393683	0.0303875	0.50758	0.0554306	0.512883	0.20265	0.440739	0	0.127043	0.0888073	0.149669	0.0918918	0.244838	0.152683	0.424152	0.0429372	0.480054	0.042417	0.479565	0.0271912	0.598677	0.0399544	0.682389	0.0613647	0.753226	0.184612	0.336077	0.0250365	0.582954	0.0932901	0.317796	0.0547753	0.477482	0.0459723	0.386444	0.0239499	0.344808	0.0690246	0.382512	0.0185013	0.192867	0.0661764
7.946	0.190502	0.817092	0.0970544	0.643191	0.413531	0.419615	0.0546372	0.324982	0.0646825	0.473772	0.102699	0.577103	0.146107	0.511823	0.00338222	0.185056	0.0535124	0.140488	0.026326	0.255232	0.235531	0.398199	0.0378159	0.4692	0.0393786	0.519884	0.0273663	0.533437	0.0244164	0.711401	0.0776593	0.745872	0.128854	0.298954	0.0304747	0.547277	0.0608655	0.326545	0.00665163	0.475162	0.0314987	0.423032	0.0276154	0.307971	0.0453258	0.318069	0.0204012	0.213731	0.0717881
8.083	0.0849059	0.625725	0.122056	0.534416	0.41561	0.381847	0.11224	0.346276	0.0663747	0.483071	0.112901	0.734538	0.206557	0.488789	0.049196	0.0862449	0.0668563	0.208046	0.117336	0.220095	0.262061	0.347649	0.0344146	0.496878	0.0444284	0.523426	0.0346284	0.587938	0.0308224	0.786309	0.0626701	0.742036	0.149351	0.372653	0.0231341	0.5286	0.0656707	0.405089	0.0386585	0.441724	0.0341515	0.365469	0.03665	0.340229	0.0513601	0.306651	0.0094531	0.203713	0.0491226
8.22	0.133398	0.674232	0.0492548	0.534427	0.43634	0.411838	0.107859	0.312631	0.0869219	0.530146	0.103039	0.627797	0.162741	0.512761	0.0683691	0.0957073	0.0137939	0.228407	0.100482	0.203289	0.411475	0.267233	0.0376828	0.527869	0.0325768	0.563372	0.0122767	0.513439	0.0262244	0.845761	0.0478172	0.910234	0.173096	0.372445	0.00619356	0.523834	0.0197869	0.38436	0.0093919	0.389845	0.0389664	0.354405	0.049065	0.382367	0.0734104	0.276363	0.0190159	0.181198	0.0539293
8.357	0.120159	0.677047	0.0307332	0.555335	0.486488	0.435802	0.114184	0.306816	0.112484	0.579413	0.0931769	0.627503	0.190256	0.556584	0.0559094	0.172034	0.01909	0.165656	0.0873764	0.223561	0.222736	0.287057	0.032132	0.543616	0.0453298	0.507329	0.0225154	0.572285	0.0261779	0.897191	0.029774	0.938513	0.129365	0.443763	0.00841779	0.523239	0	0.439451	0.00681277	0.430297	0.0245103	0.328355	0.0225288	0.373292	0.0483145	0.258345	0.0435395	0.184374	0.0486151
8.494	0.0355788	0.679712	0.0551566	0.529799	0.435334	0.45039	0.0788713	0.368308	0.0680597	0.63819	0.066652	0.652477	0.167655	0.554353	0.0855287	0.154385	0.0591088	0.209907	0.139996	0.175227	0.113427	0.454611	0.0443114	0.582049	0.0385897	0.526655	0.0105946	0.614987	0.0593998	0.972105	0.0554195	0.945291	0.0768993	0.433198	0.0111002	0.52901	0.0377373	0.459033	0.0228847	0.479043	0	0.422127	0.020478	0.296045	0.060343	0.244003	0.0549368	0.160317	0.0430567
8.631	0.115687	0.607801	0.0853935	0.564345	0.45517	0.494949	0.0759882	0.398456	0.080151	0.606391	0.102019	0.667193	0.149908	0.580184	0.197781	0.147431	0.069845	0.208375	0.175455	0.177726	0.143777	0.356906	0.0455633	0.570488	0.0622825	0.519539	0.0252021	0.558524	0.0497596	0.78944	0.0495925	0.907161	0.100364	0.377196	0.0261084	0.528213	0.0224291	0.45459	0	0.406213	0.0312238	0.487056	0.0320101	0.26336	0.0832857	0.241598	0.0813519	0.176067	0.0344963
8.768	0.0418694	0.555219	0.0605689	0.597631	0.582246	0.481151	0.121992	0.501393	0.0896398	0.603678	0.0272053	0.702873	0.0796735	0.598421	0.0825965	0.122398	0.0676343	0.143178	0.195605	0.185657	0.136935	0.357608	0.0362376	0.561494	0.0655513	0.495505	0.00761229	0.526823	0.0427164	0.804913	0.0212473	0.808272	0.0508856	0.416788	0.0259353	0.572226	0.016954	0.44487	0.0796713	0.364974	0.0464865	0.584291	0.054069	0.20348	0.0646153	0.268162	0.0886289	0.191101	0.0218724
8.905	0.0973175	0.716596	0.0553402	0.58257	0.491805	0.493099	0.113395	0.50377	0.102909	0.662394	0.101679	0.731416	0.0798501	0.687065	0.0265111	0.16362	0.0135296	0.0939537	0.163985	0.231265	0.134778	0.41665	0.0379898	0.541327	0.0542933	0.516953	0.0426081	0.53255	0.049714	0.762315	0.0291238	0.721413	0.0698857	0.443626	0.0467927	0.583565	0.0434448	0.417359	0.0315312	0.43509	0.0361819	0.596044	0.0830078	0.304075	0.0780093	0.286801	0.0665323	0.182965	0.0330185
9.042	0.0858967	0.703931	0.00230499	0.466584	0.364736	0.493776	0.137097	0.463977	0.0867011	0.681249	0.088416	0.712833	0.0995422	0.663883	0.137259	0.151108	0.0207342	0.149911	0.165479	0.195768	0.13354	0.416037	0.0568494	0.564968	0.0371871	0.546504	0.0206554	0.508407	0.0570398	0.729423	0.0388482	0.785682	0.0745691	0.519383	0.0294395	0.593404	0.0571143	0.375601	0.00302981	0.498439	0.0414149	0.685907	0.0380231	0.261126	0.0761303	0.326733	0.0662687	0.201192	0.0428743
9.179	0.0958246	0.67105	0.0267964	0.509501	0.269344	0.45634	0.103325	0.449837	0.117195	0.696224	0.00340076	0.7219	0.0742281	0.605463	0.0992759	0.144823	0.152578	0.320244	0.136439	0.167818	0.110955	0.452903	0.0394586	0.575414	0.0291634	0.495218	0.0269042	0.539392	0.0424093	0.63076	0.0579683	0.845821	0.0371521	0.560184	0.0162568	0.5961	0.0693075	0.49389	0.0104053	0.434288	0.0481337	0.727899	0.0866058	0.292344	0.0715445	0.364304	0.0565984	0.180705	0.0611306
9.316	0.126612	0.806207	0.0734742	0.566923	0.214952	0.464513	0.0473351	0.490577	0.118893	0.745125	0.0183632	0.668978	0.106748	0.596211	0.0677929	0.183731	0.162274	0.177914	0.122522	0.200043	0.127438	0.522103	0.0244426	0.592564	0.0210279	0.472812	0.0397263	0.514636	0.0255995	0.6771	0.0604438	0.882463	0.0783535	0.60843	0	0.703552	0.0732894	0.573305	0.0287186	0.533561	0.0466899	0.74547	0.0712065	0.292318	0.0612519	0.367235	0.0815143	0.20843	0.0594705
9.453	0.132571	0.745181	0.0978908	0.516426	0.280339	0.497906	0.0407801	0.530195	0.0759435	0.73546	0.125143	0.884091	0.105744	0.574625	0.0362642	0.16327	0.176116	0.139253	0.182021	0.150857	0.127696	0.480815	0.0394371	0.623513	0.0302016	0.514235	0.0478954	0.537416	0.0212604	0.548044	0.0835932	0.927938	0.112333	0.507433	0.00722874	0.769554	0.0881158	0.499048	0.0488682	0.522314	0.0245618	0.776581	0.0915264	0.323919	0.0469716	0.280549	0.0612585	0.184244	0.0520248
9.59	0.147133	0.795689	0.0833061	0.504625	0.331739	0.584955	0.225772	0.633591	0.0561862	0.80554	0.0221042	0.703317	0.0990541	0.54957	0.0318564	0.139769	0.260537	0.0772727	0.168398	0.167718	0.101722	0.570693	0.051668	0.606682	0.0440226	0.514119	0.0299899	0.604829	0.0336643	0.511602	0.0622545	0.982115	0.0502319	0.484345	0.000730917	0.901614	0.0396209	0.480839	0.0222712	0.479475	0.0353797	0.687398	0.0702082	0.288488	0.0660952	0.259266	0.0515123	0.192839	0.0426473
9.727	0.142668	0.865526	0.0340173	0.548154	0.223028	0.616362	0.137024	0.608191	0.0713459	0.838593	0.0499892	0.804259	0.10206	0.540343	0.0465982	0.187678	0.234481	0.157331	0.121239	0.306838	0.0872983	0.645708	0.0419601	0.573786	0.0298944	0.467152	0.0384317	0.550706	0.0571829	0.574628	0.0647498	1.00467	0.0529386	0.494346	0.0204465	0.920556	0.0566867	0.495583	0.0435023	0.434544	0.0276929	0.721932	0.0969114	0.279258	0.0475374	0.344824	0.0610899	0.216215	0.0585725
9.864	0.181728	0.809908	0.0528176	0.581846	0.296897	0.636697	0.0480662	0.520204	0.0965058	0.816018	0.0462482	0.611295	0.128207	0.538333	0.0494936	0.269726	0.323981	0.183837	0.203806	0.259241	0.1099	0.663955	0.0235837	0.574632	0.0339093	0.45316	0.0442471	0.544216	0.0801476	0.517094	0.0978201	1.01226	0.0545224	0.58989	0.026939	0.996195	0.021376	0.519807	0.0825925	0.513131	0.0540746	0.693148	0.0744928	0.420706	0.0570503	0.265695	0.0854048	0.243952	0.0571084
10.001	0.128431	0.767547	0.0330314	0.51651	0.222814	0.597848	0.0383676	0.541652	0.118841	0.822552	0.0544099	0.79965	0.161619	0.493688	0.0835535	0.261156	0.30393	0.207307	0.186	0.328321	0.0820049	0.599197	0	0.579385	0.0341603	0.413432	0.0569773	0.535141	0.134517	0.473339	0.11989	0.95878	0.0849102	0.472653	0.0250505	1.00421	0.0417316	0.525662	0.130776	0.512642	0.0487089	0.622684	0.0951964	0.27339	0.081184	0.297573	0.0632871	0.258886	0.0671277
10.138	0.119494	0.771622	0.0619764	0.486265	0.219889	0.608399	0.0857446	0.503026	0.050771	0.782505	0.0455685	0.548413	0.143843	0.486906	0.119117	0.226555	0.31114	0.173766	0.129177	0.288293	0.0840924	0.497271	0.0223962	0.54381	0.0530752	0.445765	0.0418331	0.523602	0.0653143	0.507042	0.151153	0.943971	0.0580936	0.508539	0.0171433	1.01443	0.0812256	0.538528	0.081449	0.570657	0.0498166	0.584597	0.0820557	0.232896	0.0799739	0.304946	0.0747118	0.295304	0.0722578
10.275	0.134063	0.756586	0.0919617	0.471642	0.183181	0.641244	0.166758	0.480882	0.0397474	0.771556	0.0540697	0.652624	0.114934	0.496228	0.127214	0.219254	0.189869	0.0882537	0.141855	0.303036	0.0930505	0.486295	0.0494477	0.53297	0.0384208	0.470707	0.030828	0.485054	0.100097	0.433062	0.127564	0.950701	0.0373292	0.559171	0.0073966	1.00956	0.0894032	0.565853	0.070637	0.554755	0.0363154	0.600691	0.0459306	0.241573	0.0261157	0.310858	0.0290509	0.316246	0.0558698
10.412	0.128431	0.66542	0.0682522	0.514093	0.140502	0.68524	0.124541	0.514811	0.0293191	0.67881	0.0465884	0.639244	0.0938513	0.523563	0.206076	0.191901	0.160502	0.0863006	0.154003	0.354408	0.106992	0.423817	0.0506631	0.512989	0.0257463	0.538162	0.0311294	0.532432	0.0520363	0.507002	0.125616	0.872905	0.0345282	0.433001	0.0209501	0.975173	0.0612036	0.552316	0.0210286	0.530391	0.0155647	0.518992	0.0418166	0.305975	0.100033	0.34437	0.0462639	0.319423	0.0433027
10.549	0.120654	0.726221	0.0239746	0.518903	0.162691	0.690394	0.0585749	0.463496	0.0117105	0.667024	0.0306053	0.654559	0.0822369	0.569133	0.16871	0.190417	0.173949	0.0954512	0.179485	0.389734	0.108747	0.394532	0.0469741	0.480849	0.0476548	0.561513	0.0282619	0.531278	0.0477261	0.430211	0.0881665	0.79726	0.0663006	0.441048	0.0308979	0.995683	0.0833665	0.551995	0.0136867	0.613291	0.025865	0.543079	0.0544279	0.248095	0.115949	0.398523	0.0344343	0.360185	0.0370716
10.686	0.0784457	0.715336	0.0655597	0.536115	0.200146	0.615116	0.110209	0.505349	0.0458227	0.734901	0.114601	0.601633	0.0837292	0.623132	0.0985371	0.244196	0.174878	0.160881	0.196525	0.384787	0.0945702	0.432084	0.0362827	0.498188	0.0546651	0.612804	0.0196479	0.519225	0.0522513	0.446127	0.0740025	0.900388	0.073744	0.475499	0.013118	0.941163	0.107816	0.58512	0.0209881	0.600929	0.0168191	0.471489	0.0390747	0.317497	0.0758954	0.384146	0.0394023	0.346441	0.0421363
10.823	0.0913594	0.720224	0.0900783	0.522926	0.196208	0.681802	0.145333	0.481177	0.015675	0.67567	0.0493087	0.597472	0.0929188	0.684872	0.0445263	0.263409	0.109801	0.242642	0.175628	0.473098	0.0955739	0.447156	0.0326538	0.498902	0.0449274	0.672737	0.0357278	0.526687	0.0378472	0.513901	0.0642808	0.932676	0.0364492	0.432947	0.0108484	0.881019	0.120051	0.659917	0.0686438	0.667443	0.0315782	0.452288	0	0.344975	0.0687042	0.359725	0.0497537	0.321441	0.0309575
10.96	0.168984	0.570993	0.0794916	0.524902	0.290747	0.731245	0.138831	0.476502	0.0515608	0.740099	0.0860359	0.568186	0.0477562	0.752853	0.0506971	0.350453	0.16498	0.146429	0.201922	0.404714	0.132203	0.36599	0.04397	0.526094	0.0460281	0.701177	0.0405185	0.515259	0.0531456	0.495935	0.0935296	0.852369	0.0287687	0.336411	0.0151429	0.83843	0.117706	0.659742	0.0771344	0.634077	0.00701465	0.450248	0.0712305	0.365106	0.0632479	0.382198	0.0591014	0.360973	0.0342055
11.097	0.0776246	0.569515	0.0310596	0.583667	0.412285	0.704129	0.117871	0.495894	0.109396	0.74611	0.063252	0.608919	0.0515972	0.755991	0.0688722	0.362596	0.155382	0.0820226	0.182545	0.397133	0.0709363	0.307928	0.0244426	0.58623	0.0226447	0.735898	0.0337157	0.52682	0.0513965	0.55222	0.102695	0.768678	0.0544191	0.411566	0.00361437	0.811838	0.0856635	0.599293	0.0601843	0.713134	0.0321613	0.43152	0.0859442	0.412283	0.0708774	0.403677	0.0573301	0.377621	0.0277887
11.234	0.154584	0.69371	0.0306652	0.565606	0.379502	0.685384	0.0906647	0.501936	0.0985327	0.791581	0.0268651	0.616797	0.0421162	0.774773	0.0592715	0.319443	0.175092	0.124091	0.155772	0.350496	0.143335	0.479495	0.0264567	0.678666	0.0342244	0.775519	0.0228483	0.530475	0.0622548	0.617848	0.114999	0.758108	0.0967229	0.444135	0.0196631	0.759537	0.0476787	0.669894	0.0357063	0.652637	0.0641654	0.471674	0.0882525	0.409957	0.0458697	0.282365	0.0565773	0.421726	0.0443642
11.371	0.171135	0.478938	0.0876441	0.48709	0.285663	0.712966	0.0896565	0.50777	0.112289	0.906648	0.0761738	0.540535	0.0297481	0.789237	0.0751645	0.304436	0.20528	0.172775	0.176503	0.373655	0.0948111	0.54694	0.0365103	0.743446	0.0693913	0.748774	0.00996027	0.520606	0.0175198	0.631387	0.154497	0.668023	0.0878023	0.470464	0.0306706	0.753587	0.0779322	0.575694	0.0749508	0.712023	0.00985334	0.474952	0.104476	0.369122	0.0465307	0.228161	0.0352019	0.417529	0.0552109
11.508	0.20573	0.65046	0.0743105	0.486692	0.207435	0.696861	0.0927223	0.540234	0.0360481	0.871836	0.186695	0.543954	0.102093	0.79124	0.132645	0.330136	0.147913	0.128771	0.110975	0.379268	0.113656	0.51151	0.0392116	0.772722	0.0432107	0.737732	0.0132526	0.507595	0.0535502	0.630892	0.168644	0.557618	0.092329	0.470228	0.0221216	0.721313	0.0399696	0.539224	0.063639	0.64224	0.0509427	0.529782	0.138147	0.365805	0.0557223	0.204909	0.0383058	0.406784	0.0477808
11.645	0.180072	0.594914	0.00849923	0.513818	0.139956	0.76864	0.10988	0.602236	0.0403893	0.807952	0.0948773	0.595242	0.127092	0.855011	0.233948	0.373196	0.289969	0.1613	0.153868	0.439398	0.136854	0.450881	0.0311979	0.812134	0.0408767	0.707584	0.0179457	0.517807	0.0471925	0.638567	0.183455	0.598033	0.0523087	0.473693	0.014141	0.698295	0.0419791	0.63125	0.0622326	0.633921	0.0887176	0.492996	0.101143	0.351238	0.0993777	0.245156	0.0450641	0.39227	0.0400358
11.782	0.154584	0.659198	0.0452091	0.538216	0.160472	0.834533	0.12265	0.67233	0.0932165	0.764034	0.0635915	0.580225	0.0899004	0.90984	0.0901501	0.345333	0.261634	0.121137	0.135475	0.353613	0.189766	0.55494	0.0313418	0.834705	0.0833694	0.665492	0.022125	0.512109	0.0307224	0.615813	0.164549	0.580516	0.0603861	0.505665	0.023823	0.689826	0.0496306	0.509811	0.0526693	0.575322	0.0859077	0.522275	0.033361	0.328807	0.132788	0.242338	0.0730164	0.372869	0.0340318
11.919	0.183221	0.564328	0.0112938	0.51954	0.209088	0.889123	0.0977993	0.712582	0.0526016	0.744847	0.0493087	0.580078	0.0891337	0.877195	0.0530988	0.419695	0.183395	0.0579505	0.158703	0.283731	0.231666	0.573286	0.0374723	0.848297	0.0761538	0.605366	0.0478782	0.541471	0.0432386	0.602936	0.107368	0.575317	0.0258628	0.54535	0.034549	0.697499	0.0651863	0.544748	0.0580998	0.494656	0.0599257	0.46392	0.109073	0.309857	0.0587364	0.234126	0.0633841	0.32511	0.0655037
12.056	0.169975	0.517747	0.0545991	0.528847	0.117641	0.848138	0.0583137	0.614634	0.105863	0.752378	0.0802551	0.623191	0.08113	0.879844	0.0623005	0.334128	0.268618	0.10717	0.179454	0.242699	0.280838	0.519268	0.0306053	0.858492	0.0575797	0.61696	0.0465434	0.531684	0.0541962	0.64099	0.124983	0.612573	0.0352295	0.58746	0.0326535	0.606449	0.0826026	0.5277	0.0413859	0.462282	0.0838974	0.379357	0.105841	0.293636	0	0.263312	0.0411209	0.270545	0.0516274
12.193	0.192484	0.669049	0.110028	0.604494	0.214892	0.863417	0.0340796	0.615739	0.0409069	0.784086	0.0540697	0.560158	0.0638914	0.841739	0.0739428	0.359262	0.226799	0.11866	0.149762	0.210594	0.282231	0.49473	0.0448525	0.845991	0.0818985	0.501827	0.0469223	0.496147	0.0464289	0.600422	0.137983	0.66137	0.057736	0.53645	0.0116212	0.590974	0.0877902	0.521405	0.0332237	0.414973	0.099848	0.332313	0.127902	0.247134	0.0609559	0.297159	0.0528619	0.243391	0.051218
12.33	0.234027	0.604619	0.0828437	0.563616	0.169335	0.866943	0.0539891	0.700899	0.0332978	0.787882	0.0877363	0.625718	0.0962129	0.814045	0.0419494	0.188738	0.202643	0.101432	0.212383	0.194943	0.161836	0.437207	0.041331	0.819181	0.072144	0.528998	0.0644777	0.530938	0.0268932	0.61132	0.154124	0.648615	0.0321833	0.526438	0.0249561	0.569542	0.0626364	0.479396	0.0277612	0.382347	0.154061	0.421992	0.138734	0.20369	0.0849761	0.235757	0.0598985	0.233327	0.0719533
12.467	0.219797	0.574549	0.0547011	0.546031	0.183534	0.865692	0.0827413	0.767146	0.0424954	0.834244	0.00680153	0.565806	0.146913	0.746012	0.126153	0.303149	0.247915	0.0931417	0.182436	0.189904	0.123085	0.466419	0.0538132	0.748492	0.0696662	0.449166	0.0506596	0.510538	0.0365983	0.714618	0.0932123	0.698151	0.0611013	0.56748	0.0578981	0.569778	0.0748331	0.461452	0.0626445	0.429324	0.094525	0.384945	0.172708	0.170635	0.0883237	0.272569	0.0822017	0.261382	0.0847853
12.604	0.203742	0.648313	0.0842784	0.570446	0.182588	0.8325	0.0868938	0.795045	0.0847177	0.84047	0.0938573	0.634488	0.137289	0.77983	0.251179	0.339576	0.168232	0.0286524	0.199572	0.274591	0.0669963	0.529903	0.0662696	0.709838	0.0771209	0.456182	0.0757267	0.532578	0.0362244	0.760602	0.0943091	0.816256	0.0446422	0.643577	0.0660431	0.59802	0.0891627	0.420935	0.0464356	0.499568	0.0766392	0.349105	0.150453	0.14213	0.0868018	0.246003	0.0753423	0.275044	0.0909286
12.741	0.198279	0.512339	0.112156	0.525447	0.168075	0.751658	0.0918291	0.628537	0.0512205	0.811095	0.10882	0.625865	0.0899032	0.785751	0.247462	0.180515	0.165122	0.0631801	0.183848	0.259433	0.136224	0.433708	0.0561237	0.678533	0.0708835	0.444727	0.046885	0.552111	0.0788171	0.80145	0.113837	0.834752	0.0611333	0.622492	0.0463556	0.572281	0.0646779	0.509986	0.0410498	0.51688	0.0547607	0.268869	0.137057	0.189913	0.0707185	0.248439	0.0715572	0.309284	0.095183
12.878	0.280206	0.615577	0.142461	0.496674	0.209681	0.705804	0.101455	0.637748	0.0346013	0.797634	0.0248245	0.513478	0.138231	0.702034	0.32951	0.199395	0.215171	0.0871845	0.250416	0.299185	0.147653	0.46128	0.050661	0.652246	0.0484869	0.398676	0.0243639	0.51539	0.0580473	0.711768	0.116761	0.709504	0.0713268	0.609464	0.0696243	0.588649	0.0931579	0.620678	0.0623929	0.583128	0.0585727	0.365969	0.154346	0.227989	0.0738051	0.251286	0.0968653	0.365925	0.0954875
13.015	0.217646	0.571661	0.219926	0.550934	0.176071	0.675178	0.0912183	0.650076	0.0206019	0.811101	0.095898	0.62527	0.0583692	0.63153	0.251811	0.161684	0.263793	0.0657322	0.230483	0.229409	0.153016	0.415272	0.0464952	0.595009	0.0565891	0.416462	0.0261636	0.56989	0.0264315	0.677269	0.122106	0.662099	0.0550293	0.67239	0.0472946	0.654708	0.0725219	0.526528	0.0633219	0.717751	0.092265	0.360218	0.150818	0.177653	0.0625241	0.329947	0.117281	0.421043	0.0979407
13.152	0.393749	0.637351	0.110456	0.455418	0.183627	0.722272	0.0812533	0.748258	0.0269265	0.789656	0.0877363	0.615905	0.103963	0.604321	0.204778	0.211791	0.321662	0	0.166706	0.22079	0.13202	0.390629	0.0382153	0.565147	0.0774371	0.48021	0.0307649	0.573185	0.0311788	0.612442	0.16117	0.58632	0.0756116	0.571301	0.0384903	0.641745	0.0583502	0.522617	0.0474214	0.717861	0.0851072	0.395694	0.138344	0.217852	0.0827854	0.344181	0.122764	0.523442	0.116603
13.289	0.260513	0.644979	0.0769351	0.477957	0.201099	0.573939	0.0407595	0.611228	0.0611566	0.802022	0.122423	0.666301	0.0894941	0.552582	0.191112	0.207943	0.247192	0.0147414	0.151116	0.301565	0.146971	0.348744	0.0513395	0.571755	0.0804952	0.492476	0.0283107	0.592695	0.0629973	0.685576	0.173204	0.525633	0.129146	0.631748	0.0415591	0.628943	0.0787369	0.645689	0.037384	0.576632	0.076963	0.45481	0.174666	0.261359	0.087592	0.281287	0.103845	0.59873	0.0978392
13.426	0.282527	0.65083	0.0834489	0.534402	0.131067	0.517925	0.0723741	0.559844	0.0433272	0.804688	0.122762	0.703614	0.0663729	0.535658	0.144283	0.186914	0.17838	0.0215678	0.219568	0.274735	0.172457	0.320895	0.074075	0.535532	0.106612	0.499908	0.00814044	0.662478	0.0277454	0.617944	0.252019	0.579474	0.081581	0.614172	0.0394398	0.701827	0.0767078	0.713801	0.0313994	0.552847	0.0480141	0.48458	0.176022	0.285527	0.0909536	0.286217	0.108904	0.659906	0.0749209
13.563	0.251081	0.671122	0.132187	0.648635	0.187172	0.508666	0.130563	0.581178	0.0356769	0.828753	0.098278	0.628987	0.191262	0.579934	0.124812	0.227906	0.235073	0.0418076	0.170269	0.302896	0.243508	0.303072	0.0854213	0.484934	0.101393	0.51616	0.0203339	0.666299	0.0598386	0.563118	0.237094	0.509849	0.0830713	0.594461	0.0226689	0.670311	0.0961869	0.612429	0.0378468	0.457328	0.118771	0.566635	0.143712	0.216721	0.108836	0.300209	0.0950898	0.755134	0.0744013
13.7	0.252071	0.65646	0.148512	0.660338	0.212519	0.444626	0.143385	0.603914	0.0282751	0.803636	0.0754942	0.72532	0.0424026	0.573353	0.152226	0.216852	0.170156	0.0477957	0.141957	0.359894	0.116948	0.297713	0.0912189	0.464546	0.131136	0.574087	0.0326708	0.687068	0.0691787	0.56191	0.249438	0.477753	0.0700473	0.568772	0.0239227	0.664547	0.072254	0.731925	0.0680674	0.374982	0.0902032	0.586155	0.143249	0.22747	0.0896256	0.24539	0.0429364	0.709512	0.0762662
13.837	0.246771	0.562701	0.133214	0.636157	0.226519	0.433308	0.0992461	0.680429	0.0644839	0.843286	0.0435279	0.687264	0.0944291	0.507673	0.0812123	0.174384	0.262929	0.036411	0.142551	0.397317	0.119976	0.410232	0.0945365	0.463668	0.134678	0.586991	0.032978	0.775171	0.0954136	0.546692	0.26835	0.491866	0.0763448	0.54668	0.0365564	0.669901	0.0602179	0.765616	0.0641034	0.311866	0.0638608	0.547443	0.142993	0.28881	0.0826038	0.222212	0.0597677	0.700314	0.0763333
13.974	0.347407	0.611654	0.0723795	0.673768	0.275974	0.413245	0.117542	0.593219	0.0131819	0.785114	0.0129226	0.712238	0.111187	0.549612	0.0368378	0.178166	0.370066	0.0880748	0.220207	0.408103	0.108787	0.368102	0.0937055	0.428391	0.0915445	0.598906	0.00512365	0.811399	0.0817327	0.539619	0.214889	0.473423	0.0898897	0.554978	0.0388628	0.633043	0.0822566	0.696522	0.0544651	0.336197	0.0962551	0.533708	0.148283	0.200079	0.0725836	0.219243	0.0883484	0.686256	0.110996
14.111	0.378684	0.643275	0.0967145	0.727617	0.272583	0.394907	0.175553	0.603228	0	0.755875	0.0734535	0.711643	0.12408	0.550414	0.0259832	0.161777	0.470349	0.121527	0.234481	0.444585	0.105398	0.3401	0.103239	0.422026	0.101847	0.633295	0.0163469	0.834464	0.0760428	0.652051	0.176267	0.475175	0.0600227	0.535027	0.0538676	0.692443	0.0329534	0.806768	0.0566306	0.24529	0.0356241	0.531912	0.0815965	0.252663	0.0672696	0.207663	0.0826129	0.678576	0.115908
14.248	0.339793	0.577734	0.134437	0.821143	0.267672	0.369837	0.166345	0.629573	0.0405088	0.753164	0.0765141	0.688601	0.121555	0.555136	0.0345375	0.166196	0.469068	0.137755	0.282931	0.449641	0.16382	0.30302	0.107994	0.435691	0.123093	0.602931	0.0262325	0.943609	0.0709226	0.621652	0.18225	0.458436	0.0627786	0.494099	0.020651	0.624486	0.0657985	0.817921	0.092523	0.171743	0.047053	0.471431	0.0796993	0.258026	0.0908698	0.165398	0.0689298	0.610066	0.109446
14.385	0.292617	0.436504	0.0671575	0.834364	0.353742	0.418974	0.171364	0.61719	0.0637518	0.751187	0.0346865	0.654111	0.113981	0.467502	0.0850009	0.172762	0.421512	0.0655653	0.269468	0.510814	0.160672	0.298148	0.108934	0.446228	0.0787399	0.591401	0.022036	0.901061	0.0614009	0.625737	0.164717	0.423187	0.0635102	0.538858	0.0236726	0.610476	0.0529284	0.851146	0.133066	0.170044	0.0634391	0.45916	0.105688	0.249227	0.130643	0.17147	0.0550507	0.562124	0.0969619
14.522	0.325556	0.337043	0.0802532	0.805605	0.248295	0.367896	0.133075	0.521717	0.073744	0.840264	0.0527095	0.604755	0.139918	0.585026	0.0611581	0.158524	0.434489	0.100185	0.212415	0.439735	0.19031	0.356948	0.0990308	0.421017	0.0935684	0.563476	0.026112	0.963549	0.077505	0.663897	0.156828	0.356739	0.0640786	0.565433	0.0402075	0.594364	0.0800003	0.858558	0.101677	0.189909	0.0442649	0.452585	0.105427	0.250712	0.132192	0.193573	0.0669308	0.528479	0.118072
14.659	0.291294	0.304975	0.107811	0.779775	0.250913	0.339617	0.140466	0.536988	0.0900775	0.888231	0.0710735	0.705847	0.0921012	0.516395	0.0823198	0.12973	0.39922	0.0869719	0.156666	0.538545	0.206219	0.380256	0.0966365	0.394018	0.161051	0.532296	0.0408055	0.912158	0.124532	0.619775	0.159627	0.385614	0.124271	0.690448	0.0441103	0.572279	0.0507485	0.760738	0.0805606	0.228007	0.0437613	0.452446	0.0660702	0.220003	0.0853175	0.194843	0.0740602	0.414687	0.0780175
14.796	0.321919	0.294606	0.0943483	0.747779	0.279726	0.412345	0.136909	0.470369	0.0680581	0.903952	0.0833156	0.551387	0.100981	0.498748	0.0720133	0.125615	0.447522	0.0882642	0.19839	0.521624	0.188383	0.350573	0.112022	0.39256	0.146436	0.457188	0.0187781	0.863255	0.141057	0.694898	0.0987186	0.410557	0.0797774	0.684767	0.0614985	0.599041	0.0211692	0.852869	0.0525555	0.224082	0.148848	0.382473	0.0813629	0.125277	0.0961785	0.212067	0.0958215	0.364548	0.0707852
14.933	0.208709	0.31986	0.109212	0.647065	0.221348	0.417723	0.0774717	0.545889	0.0503396	0.906875	0.0275448	0.573089	0.133823	0.494984	0.0363784	0.146266	0.508351	0.111936	0.131272	0.472106	0.219926	0.338953	0.12932	0.39575	0.157767	0.457466	0.030874	0.813391	0.145258	0.719341	0.142696	0.385095	0.0445856	0.622492	0.0434529	0.572609	0.043066	0.786039	0.0368093	0.209186	0.13648	0.36909	0.088058	0.195929	0.105449	0.256496	0.0478348	0.312409	0.0633963
15.07	0.254222	0.185516	0.142434	0.530355	0.246389	0.474635	0.289774	0.464466	0.0457713	0.87795	0.0720934	0.52998	0.0979378	0.41248	0.0705404	0.165007	0.501267	0.088785	0.165901	0.437412	0.245969	0.408132	0.158524	0.378547	0.166992	0.423042	0.0396488	0.695446	0.136591	0.607648	0.152918	0.394955	0.0504747	0.634342	0.0463433	0.583229	0.0396111	0.71373	0.0713755	0.225003	0.101096	0.359656	0.0948073	0.141029	0.0694088	0.264724	0.0594936	0.262346	0.0618428
15.207	0.19017	0.25032	0.103153	0.570557	0.219889	0.614403	0.195714	0.426792	0.0362159	0.839545	0.087396	0.586024	0.131	0.519445	0.0896195	0.171664	0.55274	0.100563	0.165441	0.427782	0.27036	0.413313	0.14672	0.374661	0.173683	0.455245	0	0.657506	0.175165	0.595333	0.0983659	0.465911	0.0426786	0.576441	0.0494698	0.572944	0.0754267	0.702337	0.0690669	0.272871	0.113236	0.349983	0.0519729	0.1144	0.0730751	0.234454	0.0816661	0.20572	0.0705495
15.344	0.216818	0.301863	0.161445	0.525988	0.249408	0.478678	0.213728	0.434952	0.0641839	0.792113	0.16221	0.57086	0.10279	0.514121	0.124422	0.127955	0.550273	0.0757091	0.180629	0.414953	0.342024	0.390346	0.144358	0.368188	0.167128	0.449239	0.0387073	0.670853	0.132397	0.527079	0.0557498	0.44271	0.0510669	0.541108	0.0523813	0.602868	0.0750887	0.620262	0.123484	0.304126	0.134043	0.305335	0.0582577	0.111781	0.106499	0.19087	0.0800741	0.164309	0.0719791
15.481	0.306854	0.250465	0.131412	0.492106	0.224134	0.5146	0.189326	0.498333	0.105372	0.844812	0.0948773	0.597619	0.104461	0.553386	0.0873978	0.0883936	0.377272	0.197542	0.214676	0.457266	0.26268	0.356115	0.142683	0.326337	0.132664	0.408077	0.0606543	0.654762	0.104166	0.572456	0.045759	0.398479	0.0500908	0.623072	0.0545548	0.613911	0.0800137	0.569679	0.149216	0.245371	0.149043	0.375925	0.0602259	0.147151	0.092314	0.234687	0.0960767	0.158071	0.0915307
15.618	0.224595	0.245061	0.105873	0.504707	0.204044	0.56444	0.238161	0.512011	0.0498679	0.866478	0.0894367	0.549305	0.137036	0.587395	0.0176472	0.097558	0.382142	0.176649	0.201104	0.41411	0.248148	0.348121	0.160886	0.297267	0.130609	0.399246	0.0387561	0.675917	0.0934678	0.408288	0.0712226	0.407777	0.055122	0.617281	0.0514562	0.613438	0.0807545	0.571612	0.0932374	0.214439	0.177537	0.421217	0.0275728	0.184459	0.07183	0.278164	0.138665	0.146936	0.0843414
15.755	0.183879	0.382292	0.0834285	0.46123	0.187179	0.541536	0.242167	0.402317	0.0637771	0.719349	0.148607	0.415658	0.133627	0.595698	0.0644718	0.0618207	0.305469	0.129485	0.198084	0.419103	0.217253	0.355581	0.1881	0.281142	0.128474	0.403568	0.0466755	0.657012	0.16631	0.380286	0.0858971	0.445009	0.0215214	0.577027	0.0531087	0.610027	0.114043	0.46037	0.0585901	0.201189	0.135233	0.301093	0.0581209	0.229771	0.0728883	0.217897	0.115658	0.11491	0.0784493
15.892	0.335491	0.31164	0.121002	0.377955	0.206123	0.553264	0.216611	0.473746	0.0909545	0.689684	0.16289	0.469028	0.0980398	0.530359			0.349998	0.107536	0.279591	0.421449	0.254795	0.298462	0.209133	0.253226	0.126139	0.386092	0.0430129	0.672983	0.190821	0.389939	0.118567	0.490681	0.0593608	0.582473	0.0749767	0.623592	0.133997	0.351632	0.111926	0.216195	0.0892413	0.377704	0.0986017	0.142027	0.0798403	0.232254	0.0929559	0.100899	0.058132
16.029	0.147466	0.3443	0.15606	0.399846	0.174359	0.606994	0.221097	0.450314	0.0542399	0.719098	0.193496	0.486125	0.116797	0.555291			0.229173	0.141131	0.24843	0.545605	0.290822	0.272467	0.230513	0.192497	0.115402	0.341831	0.0160139	0.680306	0.133785	0.30938	0.118485	0.462421	0.06712	0.578379	0.0642316	0.601921	0.0904563	0.442896	0.11806	0.251502	0.102607	0.365424	0.0325803	0.178899	0.090022	0.185392	0.100522	0.100646	0.0721391
16.166	0.203246	0.346817	0.173983	0.418278	0.224567	0.586245	0.212767	0.396541	0.0831831	0.695471	0.156429	0.396479	0.285518	0.598927			0.187948	0.109535	0.173935	0.3105	0.337224	0.297655	0.241626	0.148962	0.115472	0.309398	0.0324556	0.682544	0.140938	0.29532	0.0765323	0.462377	0.0509143	0.597876	0.0778165	0.590472	0.0914509	0.292019	0.127268	0.224053	0.137277	0.408888	0.0925869	0.180673	0.120556	0.186191	0.0971057	0.0499087	0.0556272
16.303	0.19414	0.266835	0.125326	0.392799	0.164097	0.532043	0.157685	0.356246	0.0441543	0.696544	0.184994	0.481365	0.215774	0.559638			0.236969	0.148333	0.225451	0.265477	0.284732	0.305859	0.260803	0.110322	0.133055	0.331306	0.0196306	0.676761	0.173801	0.23926	0.114185	0.499701	0.0757494	0.600181	0.0474817	0.562039	0.129796	0.266337	0.128729	0.194992	0.178799	0.442242	0.0729163	0.204352	0.139294	0.205965	0.100368	0.0493781	0.0663295
16.44	0.199107	0.298532	0.177308	0.434145	0.191277	0.55752	0.128353	0.280802	0.0305775	0.708953	0.128884	0.484042	0.223668	0.495167			0.162821	0.105902	0.280287	0.237301	0.209282	0.294779	0.266167	0.0846649	0.115248	0.314077	0.0349844	0.639367	0.160694	0.284433	0.114345	0.505874	0.0677663	0.609273	0.0389939	0.542694	0.0942803	0.261399	0.153248	0.219037	0.243267	0.457696	0.127206	0.298305	0.0993664	0.165601	0.114319	0.0745988	0.0784699
16.577	0.130582	0.362519	0.110816	0.444021	0.249947	0.542913	0.20126	0.319045	0.00243692	0.764137	0.194516	0.459068	0.133047	0.655358			0.0938614	0.0974747	0.206706	0.241716	0.253694	0.404716	0.264804	0.0439687	0.160916	0.306023	0.0324785	0.692771	0.254172	0.249082	0.071884	0.491828	0.0914506	0.658848	0.0503074	0.499342	0.128988	0.297623	0.134294	0.251716	0.165125	0.42617	0.115893	0.243019	0.0710433	0.162039	0.0982001	0.0601476	0.0904056
16.714	0.297917	0.374813	0.172772	0.433004	0.241851	0.527761	0.15333	0.320723	0.0680146	0.788568	0.149627	0.39663	0.156013	0.70739			0.1813	0.14278	0.159482	0.197136	0.280023	0.38397	0.263582	0.0377114	0.168497	0.283071	0.0243524	0.596364	0.221918	0.233661	0.0566862	0.464336	0.116268	0.678904	0.0628449	0.506814	0.199611	0.294844	0.146232	0.218634	0.0980332	0.364636	0.0434535	0.198973	0.114105	0.167248	0.126831	0.0534044	0.078611
16.851	0.303875	0.271648	0.189091	0.405252	0.213146	0.456332	0.151245	0.27126	0.100427	0.831346	0.181594	0.477946	0.201735	0.698938			0.16271	0.104147	0.317119	0.181579	0.302843	0.268564	0.256693	0.0576851	0.141811	0.298099	0.0436042	0.622019	0.203571	0.189946	0.0715994	0.446819	0.0517165	0.70913	0.0766117	0.485642	0.12949	0.276674	0.192004	0.212825	0.0779101	0.351041	0.0796958	0.19904	0.109122	0.154022	0.136535	0.0936541	0.0853152
16.988	0.188019	0.311862	0.129107	0.353663	0.17753	0.461273	0.198852	0.196933	0.0835186	0.964135	0.0999784	0.525815	0.166094	0.750144			0.045257	0.0707088	0.313951	0.199927	0.259245	0.22888	0.22658	0.0500032	0.160312	0.315149	0.0243869	0.625122	0.210799	0.211441	0.0740844	0.447467	0.0603393	0.77019	0.0721055	0.424952	0.149893	0.277956	0.198958	0.244531	0.111131	0.288093	0.125454	0.21463	0.100457	0.188936	0.153662	0.095807	0.0945517
17.125	0.207053	0.375921	0.118683	0.349468	0.19826	0.501628	0.212469	0.23783	0.0342966	0.846985	0.219341	0.376412	0.182091	0.824654			0.152856	0.061776	0.268216	0.143121	0.303709	0.283667	0.226481	0.029796	0.155073	0.277252	0.0583666	0.604782	0.174427	0.192777	0.0577829	0.40181	0.090819	0.830095	0.105481	0.416509	0.125154	0.25635	0.141898	0.23792	0.0855105	0.266865	0.0877383	0.219431	0.129508	0.20292	0.13689	0.108327	0.0870458
17.262	0.15094	0.347856	0.177308	0.375337	0.188032	0.523993	0.227443	0.254829	0.0353524	0.938054	0.152348	0.505895	0.160799	0.790555			0.17104	0.110268	0.200843	0.146404	0.344949	0.298357	0.216318	0.0357833	0.146331	0.25872	0.0373467	0.569446	0.110147	0.204741	0.0782068	0.47411	0.0424424	0.854661	0.108552	0.403157	0.104267	0.353985	0.132246	0.270309	0.129486	0.345516	0.063681	0.233771	0.113852	0.211599	0.12716	0.114006	0.098591
17.399	0.145647	0.354742	0.16324	0.30641	0.214645	0.630974	0.178969	0.262275	0.0713016	0.868648	0.230902	0.43751	0.0797604	0.779869			0.206277	0.0861872	0.189014	0.188934	0.457304	0.30808	0.197246	0.0537934	0.156768	0.258987	0.0510787	0.548738	0.161499	0.230545	0.100941	0.517981	0.0518444	0.83923	0.0910832	0.391186	0.0531121	0.351712	0.190544	0.250634	0.194829	0.326139	0.0797748	0.197419	0.111327	0.194311	0.133638	0.111251	0.105655
17.536	0.193312	0.412434	0.131106	0.367023	0.252553	0.644273	0.136606	0.271322	0.0660415	0.952403	0.194516	0.546033	0.144646	0.742216					0.190292	0.18184	0.503029	0.266992	0.169966	0.0484465	0.13771	0.265585	0.0456737	0.617946	0.120025	0.183149	0.110512	0.491233	0.0595158	0.869484	0.106534	0.369206	0.0743407	0.411104	0.20506	0.262773	0.145455	0.301584	0.0797322	0.194053	0.133597	0.225495	0.156827	0.179916	0.098388
17.673	0.165177	0.306752	0.12332	0.294044	0.221928	0.558315	0.226409	0.266264	0.0892591	0.86452	0.113921	0.434539	0.167083	0.687992					0.245977	0.164291	0.481718	0.2233	0.164405	0.0347325	0.121727	0.219799	0.025426	0.622723	0.0944315	0.184041	0.112716	0.467077	0.0712267	0.900137	0.133882	0.34257	0.0830302	0.42049	0.152126	0.209689	0.106291	0.259751	0.0623211	0.152048	0.123924	0.266276	0.14765	0.210664	0.0870837
17.81	0.160875	0.391699	0.149994	0.298064	0.193462	0.526783	0.330252	0.29168	0.11769	0.830182	0.231923	0.499504	0.158018	0.73035					0.233689	0.196793	0.432018	0.289006	0.183735	0.0428	0.153991	0.229654	0.0325905	0.651206	0.104785	0.212864	0.0986755	0.452753	0.150724	0.913881	0.133455	0.311828	0.0648261	0.446252	0.122136	0.221908	0.15673	0.331075	0.0678661	0.157222	0.0958799	0.326794	0.124607	0.194864	0.108135
17.947	0.100297	0.251355	0.137953	0.313011	0.248801	0.520269	0.305516	0.337952	0.160953	0.77728	0.0819554	0.426657	0.137815	0.744638					0.319028	0.34446	0.496915	0.196614	0.190673	0.0470054	0.160767	0.244999	0.0297143	0.656837	0.19091	0.234721	0.066132	0.450967	0.131052	0.819913	0.12562	0.312814	0.0497637	0.492793	0.113099	0.240217	0.119095	0.322438	0.0762576	0.122329	0.0933408	0.318986	0.110763	0.150024	0.103423
18.084	0.216818	0.289866	0.0896907	0.301726	0.197554	0.444924	0.244084	0.346889	0.0880094	0.724789	0.232943	0.444646	0.125878	0.615359					0.347347	0.203475	0.55551	0.255184	0.197587	0.0704002	0.168332	0.189727	0.0642624	0.676309	0.111873	0.198024	0.102502	0.460275	0.132835	0.844978	0.13497	0.312384	0.0230439	0.474498	0.0935217	0.194303	0.0828508	0.298216					0.127063	0.176511	0.100188
18.221	0.156735	0.209437	0.14535	0.348739	0.227065	0.45843	0.241947	0.341974	0.0975379	0.74618	0.188055	0.365409	0.164162	0.474343					0.292875	0.198243	0.400022	0.21112	0.211287	0.0992374	0.171003	0.201625	0.0473816	0.650996	0.0864334	0.21365	0.148405	0.429149	0.135975	0.776091	0.129114	0.307008	0.0693598	0.437142	0.076034	0.20994	0.0837839	0.267595					0.105739	0.174979	0.116312
18.358	0.173782	0.172557	0.122892	0.300128	0.173299	0.471227	0.229762	0.33009	0.101681	0.764472	0.131604	0.438402	0.183425	0.401882					0.356403	0.211227	0.485939	0.249798	0.203584	0.114529	0.200739	0.197704	0.0465836	0.58995	0.128588	0.203512	0.110893	0.411954	0.0654845	0.79284	0.109638	0.279283	0.0761986	0.423054	0.10265	0.247563	0.105782	0.25731					0.0634958	0.162976	0.105925
18.495	0.167993	0.210251	0.128223	0.302624	0.219249	0.346532	0.213059	0.295344	0.1998	0.768268	0.0846757	0.385032	0.238827	0.399155					0.293067	0.193425	0.310224	0.2631	0.154469	0.126526	0.158431	0.155719	0.0262096	0.568917	0.134123	0.172205	0.0740422	0.405473	0.0814883	0.752324	0.124359	0.294244	0.069461	0.418621	0.0709593	0.281352	0.126047	0.249222					0.0443007	0.11699	0.130509
18.632	0.171298	0.191738	0.152184	0.337968	0.246422	0.360619	0.192136	0.296456	0.151763	0.779232	0.049649	0.426063	0.286402	0.41663					0.332115	0.143954	0.273313	0.218297	0.134914	0.134976	0.183581	0.163019	0.0239506	0.566052	0.124104	0.217862	0.080715	0.370123	0.0684257	0.860748	0.125456	0.28477	0.0665021	0.390435	0.0767621	0.304672	0.0395504	0.357341					0.037979	0.089677	0.116777
18.769	0.0948338	0.167668	0.135396	0.394427	0.271097	0.448604	0.205313	0.353008	0.164174	0.760713	0.0411478	0.409712	0.238237	0.395188					0.335123	0.189392	0.29841	0.234365	0.131642	0.153218	0.142794	0.160082	0.0552207	0.60928	0.115087	0.216373	0.115749	0.422841	0.122384	0.838864	0.135445	0.292807	0.0764612	0.340689	0.0895914	0.33874	0.100531	0.381514					0.0543274	0.088856	0.116212
18.906	0.166168	0.199365	0.11627	0.336244	0.224807	0.458739	0.269185	0.375294	0.111336	0.686414	0.1095	0.511396	0.230195	0.32203					0.37002	0.186643	0.352634	0.256169	0.151996	0.190199	0.133248	0.13645	0.0401425	0.549886	0.107102	0.192945	0.11997	0.437674	0.0800833	0.808873	0.134772	0.298965	0.107304	0.387405	0.0728189	0.336372	0.0974117	0.409559					0.071922	0.0959379	0.124178
19.043	0.151938	0.17478	0.148179	0.392415	0.183088	0.513756	0.296595	0.324774	0.0845713	0.706212			0.269707	0.344759					0.377792	0.152833	0.443735	0.264373	0.139612	0.219772	0.138171	0.145423	0.0513944	0.548545	0.1109	0.198805	0.105963	0.47301	0.0854262	0.895862	0.139857	0.272834	0.128901	0.338415	0.0611271	0.360053	0.107063	0.372548					0.0709014	0.100122	0.108763
19.18	0.19927	0.190775	0.183087	0.430742	0.215065	0.509978	0.228707	0.26792	0.0782237	0.687094			0.254274	0.278257					0.26918	0.0720618	0.448317	0.270927	0.123873	0.193038	0.123356	0.131451	0.0776413	0.535847	0.113719	0.222702	0.0834095	0.483144	0.0591861	0.892266	0.140007	0.250296	0.0677291	0.369621	0.0413893	0.412358	0.069141	0.326626					0.0761225	0.131145	0.129614
19.317	0.1953	0.179222	0.17282	0.471917	0.192989	0.503462	0.117025	0.260995	0.0475315	0.625322			0.285523	0.264531					0.217256	0.0378258	0.389436	0.225983			0.122027	0.116965	0.0837639	0.599793	0.133141	0.215287	0.0636781	0.491185	0.0922642	0.773064	0.137257	0.261145	0.0535131	0.452177	0.0584592	0.454998	0.0311059	0.338244					0.0877622	0.174745	0.125824
19.454	0.213507	0.157596	0.262878	0.511199	0.255844	0.550495	0.0769074	0.310965	0.0649952	0.587591			0.287907	0.298413					0.237119	0.0739908	0.522574	0.172311			0.153502	0.127278	0.0687947	0.565723	0.129551	0.20444	0.0691179	0.488439	0.106808	0.766566	0.145332	0.238993	0.0917055	0.351451	0.0889641	0.467118	0.0651823	0.372859					0.080422	0.1756	0.139361
19.591	0.171468	0.144339	0.26264	0.477927	0.279139	0.546423	0.0716012	0.358102	0.122719	0.584756			0.308504	0.217947					0.290167	0.134028	0.475593	0.242862			0.186661	0.110284	0.0757411	0.613231	0.123309	0.231039	0.101904	0.51199	0.0949118	0.761695	0.168935	0.248975	0.0784433	0.460876	0.083954	0.523201	0.045666	0.396752					0.062024	0.171807	0.156174
19.728	0.133731	0.181888	0.221687	0.468593	0.199073	0.624414	0.0912183	0.336668	0.11844	0.594832			0.235773	0.212588					0.223049	0.160587	0.378832	0.214148			0.163821	0.116332	0.0692684	0.658484	0.12714	0.290991	0.0936943	0.542348	0.159729	0.708139	0.180049	0.229637	0.0600519	0.43291	0.105583	0.552415	0.066689	0.374358					0.0577982	0.171073	0.144426
19.865	0.149949	0.196405	0.242283	0.5489	0.238313	0.623724	0.130881	0.341007	0.113499	0.629347			0.205696	0.274609					0.20493	0.127524	0.473052	0.168727			0.13202	0.0835483	0.0733271	0.645007	0.11144	0.265921	0.0534838	0.559956	0.0954343	0.624522	0.171989	0.228269	0.0153756	0.386118	0.113584	0.496578	0.0831388	0.336582					0.0484042	0.163101	0.110781
20.002	0.153919	0.190627	0.125591	0.491031	0.215132	0.524235	0.0943413	0.387218	0.102653	0.667441			0.168641	0.309215					0.287893	0.130124	0.363318	0.203717			0.148107	0.0905528	0.0792516	0.651475	0.147768	0.314271			0.0860741	0.61161	0.165004	0.23466	0.107015	0.332605	0.0970229	0.477795	0.0963651	0.41761					0.0302466	0.156048	0.104635
20.139	0.291796	0.176334	0.0875149	0.420768	0.19103	0.472622	0.114674	0.450449	0.0989119	0.586636			0.156181	0.240222					0.249081	0.105779	0.318855	0.206751			0.138753	0.076384	0.0835084	0.66986	0.143208	0.218341			0.0966966	0.59717	0.105394	0.247801	0.123681	0.390906	0.0706086	0.465357	0.117601	0.41335					0.00835238	0.151291	0.112565
20.276	0.193644	0.247283	0.0767107	0.36634	0.184354	0.441983	0.103858	0.382882	0.122759	0.534939			0.124299	0.276834					0.221676	0.0990317	0.322405	0.169723			0.0856077	0.0722012	0.128246	0.624938	0.154972	0.267956			0.0873331	0.619289	0.0794462	0.207386	0.132949	0.382803	0.0581834	0.443314	0.0477408	0.418718					0.0140205	0.135285	0.117066
20.413	0.0777875	0.226472	0.195544	0.376058	0.1857	0.528885	0.098212	0.367542	0.139915	0.510439			0.155808	0.269307					0.215992	0.0791295	0.391506	0.17459			0.0930972	0.0496302	0.124182	0.55018	0.153655	0.281715			0.100954	0.62386	0.134847	0.218386	0.120428	0.461026	0.0956915	0.391682	0.0391873	0.482783					0.0488828	0.161906	0.097841
20.55	0.254718	0.308158	0.217519	0.411146	0.202844	0.478405	0.0847311	0.42013	0.148063	0.449737			0.0718234	0.188957					0.244119	0.177288	0.38881	0.210633			0.127819	0.0793564	0.123837	0.486873	0.12586	0.180981			0.15537	0.789512	0.144356	0.286458	0.0669519	0.436451	0.0734936	0.346556	0.0794822	0.47737					0.0720169	0.183207	0.078568
20.687	0.155249	0.260243	0.157787	0.402261	0.192696	0.481228	0.162047	0.359236	0.149132	0.3938			0.135484	0.212215					0.116819	0.0435217	0.34195	0.19697					0.124024	0.416621	0.103239	0.256048			0.165404	0.731978	0.145015	0.274219	0.111716	0.415882	0.0538783	0.346395	0.0777818	0.448317					0.0592174	0.166249	0.0646349
20.824	0.230221	0.348742	0.124436	0.413487	0.201312	0.482754	0.0702427	0.381577	0.127912	0.410603			0.194794	0.249952					0.149232	0.0942369	0.359241	0.205074					0.171701	0.41061	0.0908691	0.224359			0.0935642	0.755564	0.149534	0.282432	0.136923	0.481234	0.0576664	0.385684	0.0322599	0.490605					0.0595737	0.143767	0.0620957
20.961	0.251081	0.268462	0.148118	0.347922	0.182735	0.418791	0.0577967	0.472192	0.0948809	0.426968			0.166382	0.218495					0.173041	0.123449	0.333267	0.226213					0.163699	0.353106	0.0756935	0.235099			0.129406	0.825152	0.153486	0.287977	0.107828	0.572153	0.0581093	0.41635	0.0420417	0.518893					0.0588252	0.144718	0.0528196
21.098	0.138366	0.295198	0.180089	0.376657	0.123171	0.393492	0.0542816	0.451543	0.169782	0.376079			0.207906	0.254921					0.178585	0.105401	0.377094	0.143015					0.171704	0.325223	0.0700572	0.252626			0.154972	0.779501	0.169694	0.282634			0.0736573	0.385427	0.0433929	0.477699					0.0499309	0.170748	0.0434162
21.235	0.143828	0.308826	0.138504	0.399664	0.0878357	0.372235	0.0807256	0.338754	0.237775	0.423819			0.164228	0.288855					0.11291	0.0584159	0.321711	0.209297					0.205196	0.304759	0.071063	0.254717			0.121261	0.738371	0.160136	0.288144			0.09696	0.375371	0.0357271	0.535181					0.0478728	0.234674	0.047435
21.372	0.138196	0.243284	0.108158	0.46644	0.151823	0.415945	0.0934747	0.386412	0.190095	0.424656			0.167622	0.22715					0.180654	0.0597526	0.396633	0.205771					0.165168	0.286454	0.0865668	0.224257			0.144242	0.663359	0.179335	0.273055			0.0894992	0.423933	0.0332515	0.599048					0.0486151	0.275438	0.06095
21.509	0.169147	0.258688	0.112061	0.463307	0.134639	0.481686	0.0872227	0.471711	0.161911	0.389382			0.172897	0.201185					0.17886	0.0438299	0.369988	0.186157					0.160883	0.279193	0.0881782	0.249286			0.164562	0.630286	0.200815	0.301048			0.0395771	0.464157	0.0345949	0.563838					0.045005	0.317652	0.072478
21.646	0.133894	0.344449	0.115624	0.473215	0.129335	0.434227	0.103105	0.314374	0.109367	0.390162			0.145737	0.319525					0.187986	0.0167304	0.463612	0.159753					0.176104	0.282561	0.068308	0.290787			0.102033	0.643976	0.198624	0.319789			0.0644791	0.444429	0.0571158	0.500021					0.0460868	0.356158	0.0603427
21.783	0.130582	0.40051	0.136477	0.490411	0.157927	0.434332	0.0696426	0.38173	0.0712929	0.379618			0.305018	0.324993					0.163595	0.042697	0.59819	0.124291					0.182847	0.294782	0.099722	0.211987			0.134351	0.542586	0.189371	0.320925			0.0828993	0.355943	0.0315275	0.500309					0.0587345	0.381995	0.0314822
21.92	0.196623	0.38296	0.0978704	0.527388	0.141815	0.425678	0.0883246	0.34263	0.100453	0.370454									0.195618	0.0507883	0.574539	0.161843					0.200029	0.324591	0.140334	0.260806			0.153177	0.618605	0.14914	0.316396			0.0579766	0.31403	0.0815091	0.555323					0.0761667	0.443246	0.0372488
22.057	0.126612	0.328672	0.0416462	0.527916	0.137637	0.35569	0.0106595	0.525561	0.132726	0.432124									0.274762	0.0403427	0.579385	0.161744					0.208474	0.316572	0.155916	0.227261			0.141864	0.540818	0.132516	0.316036			0.0733109	0.367598	0.121366	0.568756					0.0703152	0.456858	0.0434455
22.194	0.153593	0.313565	0.0978772	0.519175	0.158174	0.319482	0.0226829	0.426613	0.160108	0.498958									0.201903	0.089813	0.660403	0.101492					0.221787	0.321744	0.157278	0.237088			0.173376	0.521474	0.133595	0.328889			0.0934433	0.421892							0.0621927	0.490368	0.0508619
22.331	0.171631	0.42421	0.0838296	0.553247	0.167269	0.367248			0.0861534	0.493733									0.239725	0.0640166	0.514396	0.132181					0.238059	0.372026	0.0660823	0.245273			0.16545	0.563539	0.12588	0.345365			0.08975	0.471882							0.0406992	0.495106	0.0682098
22.468	0.22923	0.356667	0.105377	0.530983	0.163544	0.402864			0.0428159	0.480224											0.516541	0.138913					0.250072	0.395946	0.0896509	0.2623			0.202148	0.48059	0.139044	0.360402			0.0722803	0.565181							0.0185941	0.456287	0.0656052
22.605			0.128644	0.561798	0.164577	0.425927			0.107292	0.544456											0.556233	0.108963					0.215805	0.404349	0.0997036	0.254707			0.201151	0.564163	0.112037	0.369608			0.070587	0.54747							0.00286988	0.470701
22.742			0.188839	0.509501	0.135505	0.525481			0.127353	0.640904											0.546999	0.0803481					0.200997	0.455955	0.0754952	0.248521			0.1775	0.502075	0.126697	0.379427											0.0160131	0.482365
22.879			0.183808	0.594936	0.145693	0.533044			0.153218	0.645365											0.58508	0.0739724					0.169649	0.459237	0.0140372	0.299181			0.127589	0.394565	0.163169	0.433874											0.0140647	0.521505
23.016			0.0617792	0.45985	0.120812	0.483338			0.159293	0.619136											0.457934	0.0892646					0.176366	0.457182	0.0646693	0.239627			0.18407	0.443456	0.16646	0.4488											0.00633018	0.540428
23.153			0.0569177	0.465337	0.157394	0.489854			0.154448	0.653848											0.491393	0.0974424					0.180091	0.470894	0.0964299	0.244543			0.15497	0.457628	0.162216	0.444229											0.0153299	0.52395
23.29			0.101467	0.435236	0.167889	0.524312			0.0922873	0.642693											0.521484	0.072757					0.205144	0.455406	0.0953197	0.294724			0.211028	0.460507	0.161384	0.459344											0.0123462	0.489903
23.427			0.120655	0.429958	0.127729	0.504366			0.164907	0.677257											0.462264	0.0338586					0.22342	0.445442	0.0669126	0.264218			0.250093	0.442235	0.12929	0.490151											0.00547196	0.51388
23.564			0.152667	0.407945	0.110997	0.460535			0.0734298	0.502621											0.457975	0.0456303					0.193335	0.425128	0.0460665	0.257874			0.287297	0.542	0.0886666	0.465241
23.701			0.279421	0.391206	0.183467	0.377101															0.386929	0					0.19562	0.393698	0.0629306	0.244599			0.210741	0.497307	0.106693	0.47438
23.838			0.243187	0.439701	0.167749	0.391528															0.657633	0.0477572					0.192434	0.352644	0.102959	0.241601			0.188687	0.509951	0.0913227	0.485466
23.975			0.147139	0.469638	0.230071	0.39196															0.594531	0.00817259					0.185582	0.33827	0.0482413	0.281602			0.260138	0.480174	0.104701	0.480017
24.112			0.132132	0.429632	0.162078	0.390638															0.580526	0.00864408					0.166202	0.31079	0.0793533	0.360953			0.360113	0.462477	0.0710529	0.451892
24.249			0.182237	0.413236	0.175871	0.389492															0.63096	0.0528651					0.100254	0.265028	0.083007	0.47287			0.329502	0.400837	0.10037	0.449519
24.386			0.120587	0.402503	0.153856	0.269959															0.690334	0.0261732					0.161069	0.278583	0.0434194	0.438289			0.282924	0.394898	0.106376	0.461746
24.523			0.0778394	0.404591	0.154029	0.177585															0.580067	0.026299					0.177324	0.265678	0.0620749	0.448075			0.246198	0.483163		0.460607
24.66			0.05294	0.423346	0.235814	0.222142															0.589008	0.0630023					0.177037	0.248658	0.101252	0.38254			0.250556	0.517713
24.797			0.0681367	0.433864	0.206976	0.265646															0.626331	0.0504867					0.190301	0.256598	0.0817669	0.372228			0.23671	0.454918
24.934			0.0582367	0.472172	0.20491	0.20658															0.521249	0.0236062					0.169445	0.244096	0.0721671	0.420124			0.22856	0.320658
25.071			0.0841764	0.501895	0.248501	0.209311															0.600254	0.125648					0.173929	0.242994	0.0673619	0.385431			0.253696	0.395282
25.208			0.0775334	0.540484	0.23768	0.193878															0.569446	0.0922821					0.17956	0.25439	0.054642	0.422235			0.273131	0.367809
25.345			0.0595898	0.551132	0.248761	0.194933															0.575508	0.114191					0.185008	0.265141	0.0261963	0.467765			0.289845	0.380043
25.482			0.046331	0.514433	0.274055	0.194796															0.463096	0.260596					0.28348	0.255423	0.0616282	0.44167			0.355834	0.419158
25.619			0.0500503	0.550915	0.25074	0.257117															0.363152	0.258028					0.305134	0.237059	0.0562332	0.431053			0.234768	0.338486
25.756			0.111394	0.541218	0.27031	0.199161															0.376842	0.19927					0.328591	0.233038	0.081716	0.450855			0.27362	0.405966
25.893			0.0663212	0.545035	0.241645	0.114402															0.369552	0.187692					0.254713	0.254775					0.277105	0.369166
26.03			0.0475141	0.528158	0.26354	0.132861															0.370608	0.249206					0.230039	0.283377					0.363137	0.338601
26.167			0.0601134	0.477127	0.228198	0.100153															0.247179	0.228838					0.206295	0.311296					0.388447	0.35609
26.304			0.0409799	0.519907	0.233262	0.186052															0.262107	0.224154					0.201585	0.319635					0.519201	0.308052
26.441			0	0.516377	0.278513	0.158858															0.465562	0.15913					0.183163	0.299913					0.505513	0.237939
26.578			0.0973332	0.567786	0.280025	0.1386																					0.172278	0.328723					0.486285	0.223001
26.715					0.284903	0.161056																					0.120209	0.312265					0.456662	0.242723
26.852					0.305626	0.14392																					0.0991119	0.309896					0.357554	0.182561
26.989					0.327042	0.0993836																					0.130402	0.292528					0.307027	0.234572
27.126					0.343074	0.110879																					0.136766	0.301201					0.363145	0.225048
27.263					0.325229	0.00893498																					0.109038	0.279637					0.36653	0.259888
27.4					0.38272	0.0818328																					0.126739	0.249752					0.395233	0.255044
27.537					0.338656	0.056209																					0.127698	0.211826					0.348112	0.260014
27.674					0.319319	0.0133073																					0.0763841	0.195457					0.390567	0.301193
27.811					0.264007	0																					0.110022	0.175611					0.487342	0.285713
27.948					0.307625	0.00241131																					0.163983	0.213464					0.475332	0.283699
28.085					0.345439	0.0583115																					0.125284	0.170242					0.416622	0.254606
28.222					0.267312	0.0913416																					0.104439	0.166062					0.464996	0.242586
28.359					0.2382	0.208639																					0.124644	0.156902					0.472072	0.206081
28.496					0.318839	0.256564																					0.133094	0.12767					0.525266	0.206678
28.633					0.279359	0.252616																					0.133473	0.130046					0.378342	0.231348
28.77					0.283404	0.310297																					0.150202	0.140126					0.32354	0.188368
28.907					0.195475	0.352556																					0.139516	0.14243					0.369474	0.174312
29.044					0.217337	0.361133																					0.114698	0.133601					0.360851	0.175034
29.181					0.269211	0.349185																					0.0941776	0.16116					0.420161	0.240008
29.318					0.17268	0.313911																					0.125218	0.171435					0.386507	0.214111
29.455					0.248015	0.314696																					0.109276	0.171983					0.430912	0.170672
29.592					0.175798	0.264791																					0.11382	0.164835					0.421962	0.204647
29.729					0.159879	0.224975																					0.102416	0.166705					0.38886	0.202983
29.866					0.133126	0.250396																					0.128846	0.147815					0.366024	0.156051
30.003					0.136011	0.319184																					0.112591	0.147924					0.337039	0.157841
																											0.124119	0.15003					0.314435	0.161399
																											0.102017	0.131671					0.219718	0.158898
																											0.0869242	0.170091					0.264503	0.155104
																											0.0628272	0.18182					0.172146	0.160731
																																	0.177658	0.150271
																																	0.178907	0.146308
																																	0.19988	0.111139
																																	0.211999	0.132667
																																	0.210442	0.133488
																																	0.23986	0.131666
																																	0.24327	0.114226
																																	0.214105	0.078198
																																	0.220393	0.107307
																																	0.258384	0.0802343
																																	0.275045	0.117045
[truncated: 47 more columns]
