# Supplementary material for: Progenitors oppositely polarize WNT activators and inhibitors to orchestrate tissue development
Source: eLife. 2020 Apr 20;9:e54304. doi: 10.7554/eLife.54304 (PMC7224699; doi:10.7554/eLife.54304)
Supplement: Figure 5—source data 1. [file elife-54304-fig5-data1.xlsx]

## Sheet: TRE-WIF1
Figure 5D - WIF1-MYC Pixel intensity profile (Normalized Pixel Intensity measured from basal to apical side of progenitor cells )
	Cell 1		Cell 2		Cell 3		Cell 4		Cell 5		Cell 6		Cell 7		Cell 8		Cell 9		Cell 10		Cell 11		Cell 12		Cell 13		Cell 14		Cell 15		Cell 16		Cell 17		Cell 18		Cell 19		Cell 20		Cell 21		Cell 22		Cell 23		Cell 24		Cell 25
	Normalized Pixel Intensity	Normalized Pixel Intensity	Normalized Pixel Intensity	Normalized Pixel Intensity	Normalized Pixel Intensity	Normalized Pixel Intensity	Normalized Pixel Intensity	Normalized Pixel Intensity	Normalized Pixel Intensity	Normalized Pixel Intensity	Normalized Pixel Intensity	Normalized Pixel Intensity	Normalized Pixel Intensity	Normalized Pixel Intensity	Normalized Pixel Intensity	Normalized Pixel Intensity	Normalized Pixel Intensity	Normalized Pixel Intensity	Normalized Pixel Intensity	Normalized Pixel Intensity	Normalized Pixel Intensity	Normalized Pixel Intensity	Normalized Pixel Intensity	Normalized Pixel Intensity	Normalized Pixel Intensity	Normalized Pixel Intensity	Normalized Pixel Intensity	Normalized Pixel Intensity	Normalized Pixel Intensity	Normalized Pixel Intensity	Normalized Pixel Intensity	Normalized Pixel Intensity	Normalized Pixel Intensity	Normalized Pixel Intensity	Normalized Pixel Intensity	Normalized Pixel Intensity	Normalized Pixel Intensity	Normalized Pixel Intensity	Normalized Pixel Intensity	Normalized Pixel Intensity	Normalized Pixel Intensity	Normalized Pixel Intensity	Normalized Pixel Intensity	Normalized Pixel Intensity	Normalized Pixel Intensity	Normalized Pixel Intensity	Normalized Pixel Intensity	Normalized Pixel Intensity	Normalized Pixel Intensity
(basal to apical distance um)	MYC - Tag	DAPI	MYC - Tag	DAPI	MYC - Tag	DAPI	MYC - Tag	DAPI	MYC - Tag	DAPI	MYC - Tag	DAPI	MYC - Tag	DAPI	MYC - Tag	DAPI	MYC - Tag	DAPI	MYC - Tag	DAPI	MYC - Tag	DAPI	MYC - Tag	DAPI	MYC - Tag	DAPI	MYC - Tag	DAPI	MYC - Tag	DAPI	MYC - Tag	DAPI	MYC - Tag	DAPI	MYC - Tag	DAPI	MYC - Tag	DAPI	MYC - Tag	DAPI	MYC - Tag	DAPI	MYC - Tag	DAPI	MYC - Tag	DAPI	MYC - Tag	DAPI	MYC - Tag
0	0.128477	0.802822	0.335422	0.49656	0.0947819	0	0.259984	0.0600322	0.112479	0.35197	0.162546	0.490295	0.0670169	0.888154	0.0675118	0.482504	0.0739408	0.185904	0.0346057	0.464023	0.0493454	0.390317	0.0724426	0.24687	0.0864153	0.355156	0.137859	0.248403	0.0311219	0.53944	0.181749	0.524834	0.0790557	0.240491	0.0705541	0.187191	0.117469	0.113406	0.0786675	0.084772	0.0651913	0.730177	0.137408	0.126469	0.0142069	0.141821	0.042002	0.300395	0.113469
0.137	0.118416	0.883873	0.229016	0.601726	0.0694476	0.0067834	0.260966	0.0293841	0.134453	0.330855	0.146661	0.516234	0.0239137	0.716524	0.0983207	0.630247	0.229055	0.123412	0.0531036	0.473849	0	0.323384	0.0775872	0.249105	0.0826724	0.422159	0.144538	0.199607	0.0135424	0.494466	0.22834	0.463997	0.0898035	0.194905	0.0917134	0.208116	0.151823	0.0695311	0.0925973	0.0829598	0.00798993	0.72717	0.0825058	0.137911	0.00943177	0.134709	0.0419236	0.179624	0.240989
0.274	0.058661	0.790723	0.283808	0.61449	0.0959868	0.0223502	0.291838	0.0289858	0.091653	0.355367	0.123044	0.35685	0.0474611	0.579719	0.138413	0.601954	0.200754	0.110085	0.0667105	0.651763	0.0332602	0.415777	0.0632441	0.248742	0.0416075	0.50826	0.113999	0.127733	0.00559907	0.494346	0.206373	0.433868	0.0972049	0.189094	0.0677465	0.235084	0.141338	0.0482843	0.0975148	0.0894725	0.0293527	0.646772	0.044414	0.123529	0.0303503	0.106466	0.16589	0.125468	0.182229
0.411	0.0689139	0.783485	0.292276	0.595157	0.094697	0.0294007	0.246859	0.0125061	0.0891854	0.382256	0.115528	0.371523	0.0442646	0.396057	0.15365	0.507589	0.213945	0.151007	0.0695965	0.609586	0.0382499	0.455421	0.0587237	0.246109	0.0202943	0.573404	0.115676	0.101751	0.00325544	0.49303	0.128721	0.323658	0.121327	0.176805	0.0582222	0.13493	0.128866	0.0263085	0.102769	0.0886853	0.0475438	0.513419	0.122771	0.160951	0.0870462	0.0296268	0.208984	0.0861299	0.153357
0.548	0.132632	0.787077	0.256088	0.563726	0.143274	0.0332543	0.188682	0	0.182639	0.367061	0.128285	0.38967	0.0576314	0.293793	0.250572	0.379234	0.227119	0.00843101	0.00665311	0.544683	0.0536298	0.437188	0.105402	0.290364	0.00985687	0.534818	0.138948	0.0824496	0.0373724	0.472098	0.102977	0.229925	0.144524	0.137254	0.0632852	0.119256	0.13121	0.0113565	0.146185	0.0846135	0.0118055	0.455755	0.101782	0.199824	0.0481731	0.0761103	0.165081	0.091534	0.126843
0.685	0.0439582	0.868012	0.247473	0.527327	0.216915	0.0602198	0.232578	0.00268023	0.197388	0.338839	0.124756	0.39492	0.0934888	0.230704	0.186455	0.214494	0.21276	0.0342687	0.0250085	0.583974	0.0660165	0.47772	0.0877117	0.346932	0.0183659	0.518813	0.176683	0.0530608	0.0643278	0.489622	0.135157	0.212524	0.113546	0.0917747	0.109609	0.136798	0.153577	0.0268484	0.188058	0.0790267	0.00268618	0.343823	0.10426	0.152049	0.0237638	0.0761774	0.200113	0.0740982	0.144516
0.822	0.0763826	0.873237	0.258041	0.417102	0.247228	0.10256	0.238296	0.0229959	0.181952	0.286713	0.117772	0.328983	0.092725	0.100734	0.15799	0.119458	0.246716	0	0	0.550299	0.0616761	0.385117	0.0810581	0.38279	0.0305848	0.46649	0.19788	0.0182972	0.053129	0.508462	0.127042	0.228482	0.13958	0.0707319	0.103156	0.0923517	0.170228	0.0278568	0.195736	0.0784802	0.0232151	0.221794	0.117454	0.143192	0.0238956	0.0389114	0.170742	0.0594147	0.167638
0.959	0.105097	0.838142	0.388995	0.375047	0.224872	0.121504	0.217786	0.0525595	0.186963	0.270848	0.111683	0.345829	0.123005	0.0605478	0.198841	0.0611	0.352225	0.0488606	0.0886167	0.420601	0.0379066	0.407716	0.0616938	0.406909	0.051119	0.429164	0.249406	0	0.0684944	0.493391	0.115149	0.192535	0.212659	0.0757264	0.10136	0.145903	0.200128	0.0274595	0.203174	0.0496349	0.0139217	0.129155	0.0872271	0.104405	0.059021	0.110284	0.162975	0.101037	0.194187
1.096	0.0758895	0.855383	0.366806	0.359492	0.177414	0.174934	0.234107	0.0444647	0.171048	0.282229	0.0545838	0.403	0.207852	0.0278774	0.194902	0.0351501	0.297875	0.0302521	0.0865274	0.381685	0.0673152	0.284353	0.0518643	0.406648	0.0540063	0.411063	0.258628	0.00640655	0.116415	0.490879	0.112491	0.181472	0.267799	0.0783568	0.227508	0.0715092	0.239263	0.0119183	0.218386	0.00768209	0.0492695	0.0726309	0.133937	0.090094	0.0433914	0.0688035	0.195726	0.0689025	0.221276
1.233	0.11473	0.868581	0.344112	0.327056	0.139357	0.197209	0.324463	0.0194034	0.142095	0.35013	0.0253851	0.329715	0.137497	0.0350118	0.265887	0.0500577	0.327754	0.0302652	0.092616	0.359519	0.101243	0.159081	0.0735744	0.415999	0.0444776	0.360803	0.265968	0.0112542	0.154309	0.501942	0.156424	0.202096	0.267069	0.103475	0.21711	0.0692667	0.252121	0	0.32389	0	0.156284	0.0188503	0.13482	0.123061	0.028539	0.109626	0.17248	0.106084	0.399392
1.37	0.220759	0.788573	0.308429	0.422931	0.121188	0.240673	0.367446	0.025804	0.142433	0.318599	0.10612	0.293632	0.149467	0.0262934	0.2767	0.0614488	0.365405	0.0394556	0.115931	0.369304	0.238796	0.203972	0.0907642	0.444741	0.0597638	0.310795	0.300156	0.0348056	0.113681	0.470545	0.166778	0.184123	0.219466	0.0922752	0.214057	0.0255514	0.40374	0.026736	0.425357	0.0204356	0.198788	0.0299162	0.161289	0.08409	0.0102024	0.101197	0.158153	0.183477	0.515537
1.507	0.144503	0.672641	0.23313	0.491824	0.167547	0.278925	0.392526	0.0377838	0.158123	0.280359	0.0891661	0.316937	0.185905	0.0102282	0.236883	0.102293	0.245466	0.0955087	0.127712	0.187364	0.18136	0.0745084	0.100258	0.496234	0.0775506	0.324048	0.300848	0.0603281	0.0819072	0.400514	0.148449	0.19288	0.217759	0.0574737	0.199169	0.0551812	0.463021	0.0626416	0.473113	0.0434479	0.209422	0.0291793	0.141884	0.0905274	0	0.113574	0.15236	0.229265	0.515202
1.644	0.206212	0.562819	0.13343	0.46036	0.150169	0.287787	0.382237	0.0469999	0.139143	0.311186	0.088171	0.290465	0.134206	0	0.23552	0.144977	0.204384	0.204648	0.0294774	0.138477	0.320021	0.0261758	0.0276024	0.543087	0.0951739	0.338319	0.292029	0.0584272	0.0536496	0.36158	0.153626	0.18683	0.20967	0.0789212	0.219604	0.0277703	0.331315	0.121394	0.500305	0.0401179	0.280028	0.0199662	0.144303	0.088707	0.0692234	0.162758	0.149204	0.278418	0.499964
1.781	0.174943	0.50649	0.164893	0.534755	0.143311	0.300693	0.371555	0.0602953	0.10542	0.272801	0	0.316007	0.246241	0.0582959	0.211329	0.234154	0.244323	0.247971	0.0763499	0.184487	0.292598	0	0.0143911	0.449017	0.0836431	0.295975	0.258045	0.0456028	0.0540401	0.363854	0.13054	0.160732	0.175653	0.0784561	0.3015	0.0641276	0.398106	0.175754	0.482281	0.0661657	0.276587	0	0.148972	0.0821112	0.0734848	0.285553	0.139349	0.322041	0.375277
1.918	0.152783	0.443839	0.114191	0.531931	0.123927	0.329805	0.288191	0.142109	0.0974671	0.18887	0.0444595	0.360082	0.291777	0.0338731	0.172486	0.30788	0.181831	0.323973	0.0685308	0.163607	0.26732	0.054846	0.0337965	0.458834	0.0784027	0.251504	0.222498	0.060129	0.0721409	0.38915	0.127882	0.17721	0.10458	0.0557734	0.323236	0.0381518	0.351069	0.212644	0.465883	0.0559436	0.200361	0.0612341	0.154009	0.122933	0.0813622	0.252894	0.135149	0.376866	0.275584
2.055	0.184312	0.436623	0.134661	0.594169	0.115716	0.341582	0.304798	0.272456	0.112108	0.197221	0.161063	0.456431	0.413035	0.0834096	0.154045	0.308226	0.259661	0.372596	0.0998548	0.133448	0.271526	0.0584162	0.0931444	0.541511	0.0775471	0.250647	0.206765	0.085144	0.153528	0.387057	0.168037	0.186198	0.0616523	0.0282878	0.309578	0.00545152	0.283869	0.252622	0.569539	0.0553434	0.232568	0.101693	0.176908	0.162828	0.17267	0.370159	0.112422	0.414389	0.302547
2.192	0.182814	0.42339	0.276097	0.652772	0.096507	0.385655	0.243223	0.362667	0.106783	0.214794	0.115441	0.51089	0.345171	0.109114	0.211502	0.334546	0.259825	0.386489	0.141203	0.0477099	0.225921	0.107914	0.106239	0.546205	0.0385616	0.259456	0.203008	0.115831	0.208349	0.34621	0.134038	0.19	0.106528	0.105083	0.366207	0	0.248661	0.331424	0.679403	0.075711	0.184053	0.127464	0.170311	0.172126	0.162211	0.290096	0.102839	0.436139	0.222179
2.329	0.16033	0.372466	0.244615	0.563256	0.0357854	0.462631	0.218854	0.437531	0.084772	0.207508	0.107876	0.484837	0.288021	0.164792	0.198716	0.370553	0.176511	0.331931	0.121334	0.0525903	0.193097	0.18849	0.0772922	0.49568	0.0448775	0.236237	0.201168	0.135648	0.162252	0.343877	0.104656	0.208205	0.156259	0.150643	0.405088	0.0220448	0.253244	0.375518	0.712491	0.0773986	0.219396	0.181874	0.160156	0.150002	0.161302	0.307477	0.132481	0.417413	0.220393
2.466	0.231926	0.337096	0.248175	0.567079	0.111141	0.505392	0.185624	0.529404	0.124667	0.227588	0.220301	0.403998	0.424037	0.22401	0.285972	0.36274	0.136157	0.412821	0.28209	0.0477235	0.187115	0.273917	0.082231	0.459944	0.0521111	0.24501	0.174825	0.14354	0.109513	0.336583	0.125923	0.255676	0.0782354	0.171218	0.352717	0.0217589	0.224559	0.409242	0.681768	0.0688755	0.158115	0.22922	0.175558	0.161675	0.0727076	0.247693	0.140477	0.468493	0.167935
2.603	0.251602	0.350702	0.252948	0.663597	0.132542	0.458185	0.198557	0.645485	0.147566	0.297085	0.24118	0.322414	0.291092	0.197762	0.329746	0.474161	0.121346	0.386379	0.362708	0.0318184	0.151432	0.280318	0.0772099	0.46131	0.0560795	0.30181	0.15854	0.146543	0.10131	0.393396	0.143692	0.360528	0.0618401	0.214642	0.348311	0.101154	0.19038	0.38825	0.576543	0.0661572	0.129443	0.285206	0.183172	0.15298	0.165563	0.0982993	0.100907	0.382389	0.20433
2.74	0.25895	0.377333	0.197854	0.654782	0.136852	0.399091	0.204997	0.715011	0.135364	0.379871	0.220536	0.22029	0.170812	0.216681	0.222865	0.410982	0.104406	0.394477	0.434563	0	0.131193	0.272646	0.0642456	0.509358	0.0720599	0.33813	0.171134	0.137052	0.117717	0.433346	0.142433	0.44147	0.0561216	0.252382	0.30618	0.178654	0.167639	0.526581	0.433753	0.120971	0.127021	0.342653	0.198569	0.139652	0.192554	0.120686	0.084342	0.374288	0.151769
2.877	0.254182	0.393979	0.220018	0.646327	0.112935	0.419809	0.159396	0.680404	0.0977115	0.381004	0.230778	0.133723	0.207349	0.26385	0.179133	0.516773	0.114794	0.450766	0.540137	0.0145274	0.145353	0.379712	0.0702682	0.424898	0.0965101	0.366623	0.186734	0.117098	0.100398	0.477063	0.131799	0.449018	0.0310177	0.325084	0.17071	0.255889	0.105096	0.603108	0.491261	0.17884	0.125918	0.35205	0.182927	0.208749	0.189327	0.078219	0.114232	0.404756	0.146897
3.014	0.247675	0.418784	0.174094	0.59689	0.216268	0.442318	0.136461	0.703619	0.0589164	0.351424	0.20475	0.125414	0.203431	0.271558	0.162168	0.5244	0.221447	0.405183	0.602642	0.0447298	0.134742	0.489952	0.0452586	0.476945	0.0720089	0.384053	0.161521	0.133023	0.0716196	0.4965	0.0706566	0.454952	0.0149884	0.444693	0.0566775	0.233702	0.130345	0.61082	0.493995	0.207751	0.138547	0.358808	0.1896	0.225129	0.142063	0.0175786	0.0405718	0.387495	0.1452
3.151	0.189146	0.488058	0.151209	0.575573	0.251803	0.465895	0.179295	0.804036	0.0449147	0.386559	0.124261	0.0179207	0.145004	0.27175	0.172306	0.61539	0.207534	0.418246	0.490579	0.0604671	0.11213	0.312304	0.0136777	0.507697	0.065715	0.368251	0.172402	0.134414	0.0644579	0.510675	0.0660399	0.508876	0.0611373	0.461114	0.14102	0.307439	0.0875453	0.635298	0.353589	0.275295	0.11901	0.39135	0.20987	0.213958	0.10319	0	0.0257443	0.482027	0.150781
3.288	0.235744	0.514238	0.142113	0.588723	0.156756	0.46139	0.145901	0.807208	0.0854676	0.412147	0.149158	0	0.0448453	0.26223	0.216625	0.61244	0.206795	0.366087	0.31774	0.074648	0.172634	0.394897	0.0286107	0.519748	0.0788957	0.356304	0.141388	0.133909	0.0997471	0.562344	0.0924834	0.519707	0.0597939	0.47598	0.160872	0.337066	0.0650146	0.664026	0.248896	0.361101	0.112909	0.328979	0.199825	0.184805	0.136635	0.0217256	0.0513499	0.508099	0.118616
3.425	0.288218	0.55673	0.125455	0.651236	0.0900898	0.50775	0.151465	0.800166	0.104499	0.405847	0.159326	0.0103766	0.242276	0.289355	0.164984	0.695875	0.165672	0.377586	0.247864	0.152522	0.128092	0.300003	0.0589775	0.563015	0.10249	0.331657	0.183578	0.143529	0.0907618	0.557022	0.0654798	0.47742	0.0305546	0.425819	0.126985	0.368709	0.0878901	0.705939	0.192859	0.43095	0.0922062	0.356008	0.168254	0.177614	0.118299	0.0451672	0.0954701	0.613052	0.0975564
3.562	0.39433	0.598365	0.043288	0.611316	0.0894741	0.516605	0.129416	0.809023	0.0924191	0.415493	0.24589	0.00643699	0.17494	0.21381	0.164482	0.728696	0.180993	0.387971	0.155596	0.262345	0.0807059	0.404327	0.0618173	0.649398	0.0968824	0.28558	0.203363	0.143271	0.071099	0.540216	0.0677182	0.503286	0.0398567	0.448814	0.0974479	0.448481	0.12	0.728816	0.162907	0.378727	0.0741523	0.399231	0.162645	0.202308	0.170733	0.0420712	0.038188	0.668747	0.0718801
3.699	0.212112	0.659506	0.150969	0.734061	0.0587046	0.553808	0.139954	0.833721	0.0764856	0.383964	0.198872	0.00482951	0.22667	0.32624	0.189092	0.676695	0.142251	0.452141	0.250207	0.2899	0.164883	0.419838	0.0554175	0.705531	0.0674834	0.252598	0.190564	0.167187	0.0569051	0.526522	0.0871667	0.504209	0.0375674	0.413611	0.163963	0.441441	0.0784745	0.71268	0.197861	0.478365	0.079778	0.379442	0.173624	0.189203	0.0665098	0.194759	0.0351827	0.645339	0.074785
3.836	0.168232	0.742663	0.164278	0.647248	0.0493363	0.552854	0.150116	0.831043	0.0620655	0.38986	0.222779	0.0472778	0.224289	0.312583	0.10122	0.760393	0.120707	0.459035	0.335869	0.283342	0.199886	0.395167	0.0595606	0.708961	0.0907926	0.250046	0.227553	0.193197	0.0912831	0.581723	0.0965407	0.457891	0.0239708	0.452839	0.145074	0.410314	0.0461484	0.718619	0.223278	0.534646	0.0970666	0.35482	0.179023	0.165353	0.136635	0.189161	0.039401	0.599164	0.10497
3.973	0.0874052	0.658547	0.270709	0.642977	0.0413427	0.67492	0.135192	0.808411	0	0.383853	0.185644	0.110123	0.230379	0.301582	0.131772	0.842673	0.191052	0.485718	0.290078	0.255497	0.174194	0.330389	0.0891728	0.742119	0.120164	0.26548	0.205124	0.214926	0.108211	0.562285	0.11375	0.446828	0.019216	0.422038	0.0902427	0.422104	0.0383986	0.81849	0.130739	0.626896	0.110028	0.319886	0.150205	0.212793	0.142063	0.157492	0.0316041	0.516311	0.111613
4.11	0.087351	0.647722	0.233838	0.640685	0.0422822	0.698576	0.0918323	0.824426	0.0110407	0.355382	0.248059	0.221676	0.257447	0.320677	0.159687	0.824214	0.233806	0.397831	0.221357	0.152306	0.218449	0.442754	0.0608982	0.800589	0.095882	0.28123	0.0699337	0.166427	0.0716196	0.557441	0.0940225	0.447116	0.0347283	0.391163	0.0625005	0.436752	0.0166861	0.902447	0.11162	0.60242	0.0599298	0.367964	0.152595	0.272099	0.212188	0.173426	0.042171	0.426369	0.103091
4.247	0.121219	0.700183	0.179772	0.597631	0.0625103	0.67179	0.0926764	0.882525	0.0613652	0.36881	0.226476	0.291388	0.205445	0.27113	0.115208	0.797732	0.143078	0.365796	0.178426	0.112584	0.228481	0.374	0.0225882	0.861935	0.0647202	0.321779	0.184119	0.21704	0.0216159	0.583935	0.0849276	0.450977	0.0774001	0.403406	0.100208	0.479934	0	0.92548	0.149269	0.564717	0.0730652	0.393143	0.170586	0.365652	0.253255	0.194624	0.0252917	0.384669	0.0626103
4.384	0.10767	0.564697	0.169328	0.615551	0.0782799	0.661852	0.0857268	0.929331	0.046555	0.395232	0.202259	0.428125	0.296486	0.404729	0.14075	0.828202	0.162827	0.441738	0.19915	0.13427	0.18255	0.446173	0	0.841936	0.0740675	0.413463	0.218921	0.258797	0.0260435	0.533699	0.0842283	0.47788	0.0989683	0.371217	0.0479167	0.532564	0.0725657	0.833017	0.224787	0.641065	0.127338	0.448352	0.115753	0.388873	0.213868	0.142876	0.0512231	0.41449	0.0766352
4.521	0.103479	0.469543	0.073403	0.733551	0.0991662	0.728732	0.0869691	0.936366	0.0455586	0.466985	0.209744	0.497038	0.201051	0.489815	0.128293	0.865325	0.310949	0.517952	0.263017	0.116219	0.161046	0.618402	0.033625	0.85809	0.06635	0.477747	0.291734	0.248313	0.0628953	0.542311	0.0768131	0.490727	0.0675948	0.342414	0.0324207	0.53539	0.0574518	0.890076	0.200815	0.580648	0.073329	0.493034	0.100205	0.439702	0.179256	0.157227	0.129512	0.485586	0.127218
4.658	0.0948017	0.512213	0.0834721	0.567826	0.102638	0.744414	0.0888114	0.95106	0.0772658	0.458196	0.153955	0.564189	0.137235	0.479694	0.143464	0.773305	0.258171	0.519154	0.312918	0.137854	0.096612	0.390271	0.0511097	0.883769	0.0651145	0.499873	0.275509	0.230925	0.0476594	0.608334	0.0652001	0.466185	0.00688774	0.391113	0.0829477	0.535216	0.0504149	0.78735	0.147889	0.568124	0.0369046	0.483051	0.149042	0.508965	0.20302	0.182116	0.0987289	0.460928	0.106196
4.795	0.110785	0.597498	0.067497	0.52918	0.0430253	0.700451	0.0806831	0.957072	0.133607	0.483707	0.197159	0.684809	0.102278	0.441512	0.139991	0.706446	0.197404	0.504756	0.306729	0.201691	0.119262	0.606738	0.036307	0.891541	0.087968	0.546525	0.23799	0.269201	0.0548218	0.623165	0.030921	0.45426	0.0176459	0.406909	0.106603	0.588461	0.020976	0.79083	0.171051	0.529968	0.0408943	0.495456	0.0935494	0.603706	0.288901	0.151304	0.0705525	0.458031	0.0653585
4.932	0.207704	0.61461	0.0453141	0.514154	0.0470008	0.661373	0.0902555	1.00256	0.085148	0.469953	0.211889	0.813105	0.105595	0.517562	0.107347	0.687431	0.159237	0.510485	0.32519	0.230321	0.142882	0.574686	0.020743	0.840482	0.0924017	0.541157	0.207619	0.266047	0.00677121	0.62861	0.0131522	0.486177	0.0831972	0.407222	0.101826	0.671333	0.0428813	0.785862	0.205726	0.562444	0.0562673	0.575005	0.0477914	0.578175	0.351663	0.209375	0.0664066	0.525631	0.0537976
5.069	0.212515	0.586644	0.0839032	0.466673	0.00921439	0.733134	0.0579281	0.982906	0.085242	0.46179	0.179402	0.817014	0.0630984	0.487159	0.131969	0.692297	0.0883994	0.532754	0.401593	0.226204	0.107525	0.647099	0.0133416	0.848325	0.0713808	0.532354	0.198313	0.279816	0.0362003	0.658093	0.040995	0.542751	0.13016	0.424555	0.0947198	0.723113	0.070526	0.772159	0.187171	0.598365	0.112957	0.611472	0.111839	0.578058	0.290448	0.217606	0.0591649	0.560373	0.067674
5.206	0.288801	0.560807	0.139921	0.623356	0.0543469	0.707725	0.0551939	0.961321	0.127125	0.518009	0.156044	0.87172	0.0961883	0.518716	0.166663	0.662562	0.104436	0.666739	0.44455	0.17658	0.128402	0.707039	0.000672226	0.842941	0.0360968	0.55103	0.240779	0.324328	0.0121099	0.672566	0.0631015	0.57651	0.0984629	0.423128	0.0732933	0.667461	0.109217	0.782126	0.132592	0.60735	0.0529901	0.639436	0.139319	0.53603	0.254157	0.214379	0.0615305	0.61123	0.104336
5.343	0.246178	0.626317	0.210368	0.578746	0	0.709342	0.0551461	0.906283	0.0666294	0.477627	0.101676	0.721417	0.0537129	0.558452	0.14873	0.619748	0.110254	0.772616	0.398042	0.224824	0.108678	0.666019	0.0160168	0.759173	0.0464418	0.559763	0.250897	0.361363	0.0484411	0.658512	0.0558261	0.579621	0.0629308	0.411233	0.0517715	0.706343	0.0916014	0.780951	0.0864228	0.603819	0.0117105	0.739965	0.156212	0.488299	0.190881	0.221027	0.0502878	0.69653	0.148111
5.48	0.280316	0.612819	0.158341	0.514709	0.0127016	0.740898	0.0758199	0.916198	0.0714893	0.448116	0.133496	0.768848	0.0435793	0.50523	0.100042	0.630332	0.0820998	0.661965	0.294705	0.25131	0.101605	0.725313	0.0361356	0.737357	0.0819843	0.530295	0.232699	0.445116	0.0721409	0.667839	0.030921	0.566142	0.0635099	0.41556	0.0104439	0.712134	0.0602513	0.825884	0.0681975	0.620636	0.00111352	0.809859	0.14338	0.519491	0.171379	0.18455	0.02152	0.783311	0.122087
5.617	0.165045	0.606651	0.176669	0.553133	0.071523	0.780586	0.104277	0.908678	0.0408302	0.49744	0.115936	0.742555	0.0710033	0.509278	0.0687372	0.494263	0.135019	0.739764	0.245031	0.234793	0.101598	0.837159	0.0587237	0.731019	0.0898205	0.496073	0.254245	0.529674	0.0481807	0.631241	0.00125941	0.566082	0.0583112	0.412631	0.00701128	0.714406	0.0663997	0.888429	0.0734001	0.645927	0.0364824	0.890879	0.0960678	0.491017	0.102024	0.149393	0	0.79435	0.0879766
5.754	0.0988487	0.601905	0.11961	0.46306	0.0650103	0.787354	0.083842	0.906069	0.0478852	0.447932	0.126443	0.669862	0.11385	0.566264	0.0956128	0.420824	0.0919949	0.708985	0.203255	0.194237	0.135187	0.769415	0.0496075	0.741545	0.0587869	0.472693	0.280594	0.480665	0.0420604	0.624841	0.013292	0.603876	0.036825	0.430849	0.0421156	0.751573	0.0749269	0.908964	0.103028	0.649334	0.022603	0.92466	0.134744	0.521851	0.135865	0.278706	0.00449591	0.773511	0.10805
5.891	0.124556	0.684601	0.0993118	0.533311	0.0337366	0.776103	0.0492317	0.986508	0.0200415	0.477021	0.15702	0.611741	0.0803522	0.577552	0.20171	0.486985	0.189896	0.549362	0.248598	0.184346	0.088226	0.732799	0.0310321	0.718761	0.0178833	0.482325	0.295143	0.485636	0.000911165	0.619877	0.0998987	0.616723	0.0133534	0.465263	0.0681419	0.738711	0.099772	0.875924	0.125575	0.679745	0.0232415	0.974341	0.147634	0.487349	0.0575983	0.288515	0.0311937	0.735686	0.132383
6.028	0.130696	0.732083	0.0683407	0.543657	0.0594636	0.776329	0.0140852	1.03381	0.123309	0.513321	0.170483	0.558779	0.136299	0.557694	0.298602	0.477542	0.129405	0.612513	0.231281	0.270154	0.0622135	0.972994	0.0312859	0.678555	0.0203425	0.482371	0.325045	0.567289	0.0375026	0.628428	0.136276	0.577202	0.0220244	0.490931	0.0815333	0.707808	0.0631268	0.847207	0.11184	0.715751	0.0457706	0.866587	0.117723	0.402894	0.211668	0.261453	0.066129	0.73376	0.129017
6.165	0.142542	0.882411	0.210756	0.603444	0.0322345	0.748744	0	1.03879	0.0936929	0.55798	0.246644	0.434536	0.0902452	0.492231	0.255581	0.473349	0.110946	0.593635	0.216382	0.271099	0.111828	0.914931	0.0639918	0.676894	0.0308061	0.479169	0.299405	0.639662	0.0438833	0.611862	0.0596037	0.585959	0.0368496	0.521686	0.0783206	0.637121	0.0906487	0.758627	0.133538	0.721188	0.0358017	0.873752	0.0850709	0.380476	0.192041	0.234657	0.0603175	0.796473	0.102102
6.302	0.108164	0.962997	0.1472	0.677957	0.111809	0.810998	0.0411777	1.00277	0.065727	0.517678	0.17107	0.362778	0.147008	0.565786	0.115333	0.534713	0.0900124	0.538166	0.187696	0.249799	0.0406384	1.02514	0.0841517	0.731987	0.00938875	0.557254	0.189229	0.688843	0.00611974	0.630043	0.0643602	0.589417	0.0463681	0.534824	0.0698839	0.556972	0.101531	0.727778	0.144403	0.704071	0.0657666	0.806752	0.0403413	0.466699	0.178999	0.286936	0.0442771	0.792854	0.060492
6.439	0.0511021	1.10519	0.0691844	0.62363	0.102977	0.763142	0.090797	0.988222	0.0882031	0.532244	0.175143	0.388136	0.167406	0.609303	0.0991157	0.559635	0.0872439	0.527051	0.132292	0.259151	0.121654	1.1253	0.0510686	0.687474	0.0155654	0.619406	0.126167	0.739128	0.0265642	0.641706	0.0275631	0.58711	0.0627573	0.531338	0.0362892	0.537856	0.100327	0.683744	0.112831	0.729156	0.0476019	0.826002	0.0278837	0.431425	0.0887258	0.296285	0.0617297	0.873606	0.0550725
6.576	0.0282451	1.21725	0.119173	0.545362	0.121342	0.784493	0.1209	0.981868	0.0642699	0.468369	0.106399	0.336909	0.155253	0.653359	0.116905	0.657062	0.0546843	0.558795	0.013301	0.302944	0.0962947	1.12526	0.032795	0.647805	0	0.664283	0.104014	0.785092	0	0.601336	0.0286826	0.563835	0.0358893	0.59519	0.0224284	0.530077	0.103951	0.703215	0.0706466	0.701916	0.0282392	0.800525	0.054289	0.507012	0.125017	0.292927	0.102748	0.99691	0.0951768
6.713	0.0967079	1.59082	0.0905852	0.527507	0.133444	0.774232	0.148651	0.950551	0.0642558	0.560629	0.185397	0.304531	0.107698	0.812163	0.230254	0.601513	0.164657	0.749035	0.0413802	0.366806	0.110141	1.12669	0.0428304	0.645849	0.0213008	0.683445	0.0836523	0.8066	0.0119798	0.583396	0.0240652	0.581292	0.0284566	0.656984	0.0898055	0.480188	0.0700292	0.697164	0.0815118	0.757129	0.0256797	0.709592	0.0170504	0.496757	0.0876917	0.295694	0.118094	1.02234	0.102101
6.85	0	1.4109	0.108876	0.497326	0.123163	0.761088	0.153843	0.904938	0.101946	0.529706	0.211209	0.346797	0.0356272	0.829298	0.220068	0.570366	0.222556	0.588987	0.13235	0.430997	0.119146	1.16491	0.0579692	0.633573	0.0328055	0.700015	0.0972627	0.880548	0.0479204	0.579329	0.024345	0.635272	0.0278931	0.656721	0.106442	0.47003	0.0462244	0.734303	0.173856	0.706461	0.0209089	0.661643	0	0.373556	0.0803281	0.265735	0.109284	1.05905	0.0796596
6.987	0.150023	1.47703	0.213287	0.544612	0.0928499	0.800707	0.217117	0.973628	0.0775525	0.577863	0.093227	0.358316	0.0866406	0.939096	0.1948	0.549301	0.227934	0.671431	0.112755	0.346277	0.126998	1.21272	0.0698497	0.652306	0.0269521	0.695449	0.0849328	0.96043	0.0471388	0.594101	0.0109131	0.700547	0.0252651	0.689862	0.121086	0.468577	0.0784278	0.799156	0.171997	0.724444	0.0602834	0.651431	0.0336976	0.441571	0.0734848	0.329864	0.0741372	1.04763	0.0823863
7.124	0.0890649	1.53378	0.135992	0.556425	0.0879561	0.845277	0.252583	0.966943	0.0519414	0.615229	0.124107	0.343743	0.0382326	0.968247	0.194746	0.535778	0.198079	0.584958	0.0414171	0.409868	0.122072	1.12781	0.0399837	0.64559	0.0262779	0.648843	0.0718153	0.994526	0.0184907	0.603968	0	0.731887	0.0401859	0.686844	0.127913	0.491886	0.0877206	0.780981	0.160724	0.755832	0.102745	0.696625	0.0293854	0.460778	0.0661212	0.265207	0.0570769	1.01471	0.101609
7.261	0.0941883	1.54287	0.12769	0.558328	0.140403	0.798634	0.154958	1.01384	0.0434999	0.624608	0.204428	0.422245	0.0646679	0.996015	0.124371	0.562468	0.131534	0.679081	0.128905	0.416797	0.112637	1.15807	0.00937	0.616916	0.0492265	0.709364	0.0719055	0.866844	0.010287	0.588419	0.0296616	0.721171	0.077155	0.662032	0.0827757	0.555	0.0910929	0.73541	0.160989	0.819453	0.0306879	0.723885	0.0646431	0.479533	0.00710676	0.32519	0.0525629	1.01309	0.0644463
7.398	0.0934366	1.41176	0.130757	0.616555	0.15475	0.814367	0.0657219	1.0487	0.0441814	0.616191	0.148886	0.419632	0.0801168	1.00926	0.0883559	0.574567	0.102723	0.670999	0.111394	0.515319	0.0995491	1.11473	0.0166479	0.613418	0.0399949	0.805204	0.105619	0.834491	0.0238294	0.623048	0.0664595	0.763803	0.0676494	0.658621	0.0921711	0.585432	0.0949678	0.825982	0.168868	0.854032	0.0283447	0.678863	0.124997	0.489769	0.0366798	0.426847	0.065085	1.02104	0.0549854
7.535	0.0954331	1.39236	0.117319	0.660944	0.0246761	0.791767	0.0488123	1.06193	0.0938527	0.676579	0.058725	0.38485	0.0557166	1.0118	0.0871365	0.5595	0.0441029	0.760697	0.0268446	0.574798	0.0330586	0.917769	0.0352575	0.661813	0.0303421	0.904937	0.168904	0.825979	0.0536496	0.619757	0.0499493	0.738628	0.0805828	0.652785	0.09794	0.620071	0.0770835	0.797769	0.154083	0.831739	0.045417	0.706918	0.168716	0.525284	0.0605688	0.376545	0.0499679	1.01004	0.0945907
7.672	0.110653	1.24331	0.156376	0.713116	0.0419212	0.77656	0.0859922	1.05843	0.107925	0.740477	0.094148	0.428134	0.0651858	1.00125	0.110802	0.596974	0.130901	0.703649	0.0896509	0.53807	0.039948	0.941084	0.0356348	0.655424	0.0279415	0.927658	0.150821	0.732623	0.0621136	0.646192	0.060303	0.732119	0.0871686	0.66965	0.0542735	0.694639	0.0983518	0.825393	0.117295	0.850354	0.0593968	0.723503	0.160337	0.492837	0.04843	0.365024	0.033843	1.05799	0.120489
7.809	0.0742478	1.06049	0.230186	0.715654	0.124299	0.817943	0.094386	1.07679	0.0854112	0.803886	0.0850373	0.443531	0.13056	0.82352	0.143315	0.606419	0.181761	0.632132	0.143868	0.427914	0.0298565	0.861764	0.0556301	0.670263	0.0251693	0.90638	0.104795	0.661422	0.0630255	0.663593	0.024345	0.67612	0.070453	0.752806	0.0210304	0.786849	0.162612	0.834793	0.053121	0.77411	0.0300704	0.732716	0.137122	0.468504	0.0668984	0.437908	0.0525448	1.08848	0.143185
7.946	0.10663	0.858704	0.204308	0.636568	0.145785	0.814337	0.0517535	1.05866	0.0716021	0.840615	0.153602	0.460723	0.102911	0.764211	0.127384	0.671791	0.224521	0.632446	0.0733056	0.457564	0.0590599	0.750465	0.0855784	0.683127	0.0584952	0.928078	0.110957	0.618912	0.0544313	0.64679	0.0512087	0.648698	0.0525025	0.83057	0.0517756	0.834743	0.126517	0.814365	0.0840775	0.819291	0	0.790614	0.125173	0.510875	0.0896281	0.440742	0.0792848	1.09394	0.113838
8.083	0.090033	0.785726	0.119727	0.71997	0.21044	0.890784	0.0444269	1.05351	0.120202	0.894007	0.172961	0.458971	0.179073	0.71829	0.145251	0.592659	0.228562	0.678351	0.0688632	0.421201	0.0867966	0.841666	0.0786298	0.646351	0.0552363	0.957242	0.0930666	0.636382	0.0296894	0.650377	0.0489703	0.596847	0.0499817	0.841737	0.0932923	0.864717	0.104524	0.85502	0.103424	0.860748	0.0499239	0.891778	0.153454	0.62185	0.0751643	0.447982	0.0927363	1.06338	0.0468135
8.22	0.125687	0.752648	0.093646	0.58647	0.23106	0.924776	0.00515518	1.10849	0.201308	0.935046	0.15762	0.489702	0.208061	0.730522	0.135293	0.549937	0.190577	0.623782	0.0421083	0.457026	0.0964328	0.869433	0.040992	0.643858	0.0434317	0.92864	0.106749	0.71356	0.0631556	0.673762	0.0717761	0.59316	0.0386717	0.841361	0.113006	0.867841	0.094547	0.827514	0.0739379	0.832634	0.0501244	0.967748	0.199919	0.599918	0.102156	0.448576	0.0635522	1.02383	0.0503525
8.357	0.110124	0.705672	0.0313652	0.568674	0.143747	0.945566	0.0062117	1.11528	0.339614	0.94976	0.129225	0.597686	0.253879	0.765615	0.138622	0.545191	0.159384	0.652767	0.0899727	0.373724	0.0959402	0.837558	0.04768	0.605177	0.05965	0.877152	0.09692	0.707224	0.070318	0.663236	0.0208471	0.513082	0.0526289	0.836881	0.100432	0.916501	0.0587843	0.802466	0.0630273	0.84353	0.0517393	0.962911	0.20128	0.543481	0.16634	0.484129	0.0278806	0.934022	0.0815111
8.494	0.179886	0.591909	0.12208	0.686532	0.0569424	1.03476	0.0166654	1.09466	0.496581	1.014	0.235438	0.546511	0.227298	0.740164	0.171033	0.572203	0.150404	0.750782	0.104482	0.577272	0.0681475	0.789077	0.0717704	0.626923	0.0670332	0.874254	0.107969	0.666278	0.0437532	0.634052	0.0172094	0.442969	0.0393458	0.868793	0.0721303	0.938054	0.0626826	0.820455	0.0841358	0.833279	0.0594284	1.0076	0.215304	0.57926	0.160268	0.476688	0.0232037	0.845009	0.0475064
8.631	0.0529242	0.650654	0.18138	0.658476	0.0466027	1.07836	0.0810706	1.16416	0.779915	1.05008	0.117135	0.470601	0.255386	0.682577	0.173663	0.575078	0.135042	0.794008	0.11046	0.498667	0.077347	0.787932	0.0858665	0.64682	0.0739428	0.822278	0.12173	0.692566	0.0529988	0.593445	0.0671588	0.539352	0.00870102	0.872928	0.0884185	0.906821	0.0933313	0.830427	0.0584402	0.859454	0.0977949	1.03625	0.193275	0.59737	0.116106	0.528967	0.0660566	0.919089	0.013249
8.768	0.134983	0.643524	0.158341	0.683123	0.0565762	1.12727	0.0387939	1.22339	1.10445	0.942185	0.129812	0.543818	0.189217	0.671952	0.170543	0.542601	0.162246	0.827813	0.180019	0.487523	0.0869832	0.890484	0.0970337	0.645937	0.0379921	0.812634	0.0775565	0.698832	0.0540401	0.579809	0.0194479	0.504957	0.0269213	0.926412	0.112174	0.873643	0.0982291	0.840329	0.0499787	0.846324	0.0505255	1.03373	0.143421	0.545991	0.135219	0.554118	0.0825979	0.952759	0.0577762
8.905	0.0424307	0.744773	0.109011	0.663376	0.0690018	1.08662	0.0925862	1.23267	1.23505	0.794207	0.101843	0.557695	0.0876294	0.716447	0.175516	0.635041	0.171825	0.877802	0.200327	0.542344	0.0918461	1.10007	0.0903869	0.618404	0.0442246	0.847803	0.0799551	0.729046	0.0304711	0.585069	0.024345	0.542519	0.0488316	0.95245	0.135386	0.866821	0.130532	0.812548	0.0601831	0.810703	0.0535495	1.09327	0.139354	0.521029	0.09686	0.66098	0.076714	0.942844	0.0476671
9.042	0.0729068	0.776782	0	0.7379	0.0800049	1.16528	0.104341	1.28147	1.22978	0.701101	0.111813	0.536876	0.115917	0.709026	0.101758	0.71033	0.118472	0.927367	0.112538	0.593508	0.0926037	1.026	0.0890905	0.641158	0.0429664	0.871284	0.0849869	0.708458	0.0125004	0.588718	0.0130123	0.554562	0.0211734	0.895565	0.171459	0.938658	0.189006	0.927103	0.0775013	0.77622	0.124256	1.04777	0.174507	0.541823	0.0626369	0.711083	0.0549949	0.977577	0.0220725
9.179	0.073454	0.875097	0.058598	0.737962	0.0636409	1.19461	0.0873991	1.30098	1.22774	0.642289	0.170532	0.492058	0.144434	0.589935	0.0890433	0.569291	0.146028	0.865658	0.206811	0.50875	0.0850537	1.34717	0.10377	0.67061	0.113993	1.01431	0.0663808	0.65605	0.0145844	0.608695	0.00853479	0.627382	0	0.804479	0.132659	0.976365	0.0826768	0.817035	0.130389	0.807449	0.177837	1.07007	0.20135	0.592493	0.0727076	0.627334	0.0638901	0.983625	0.0388267
9.316	0.141237	1.00695	0.0897723	0.589915	0.0940919	1.1126	0.0878929	1.29715	1.17481	0.564453	0.17772	0.447879	0.134918	0.646547	0.204054	0.480838	0.0891384	0.829156	0.145403	0.575001	0.116183	1.2482	0.120459	0.686037	0.0502971	0.999735	0.0627798	0.608347	0.0235691	0.612223	0.0202877	0.628938	0.0256263	0.738578	0.0426611	1.0276	0.0735476	0.843247	0.156758	0.83813	0.19987	0.987891	0.193287	0.673123	0.0866576	0.587304	0.0892724	0.996657	0.0729895
9.453	0.176332	0.881162	0.0888054	0.65381	0.117669	1.06933	0.075289	1.24847	0.992292	0.53932	0.0582677	0.576952	0.0787357	0.619951	0.135585	0.659668	0.131734	0.77171	0.189237	0.757022	0.191302	1.27522	0.0990024	0.649259	0.0116108	0.911766	0.0564255	0.588079	0.0226579	0.598289	0.020987	0.711435	0.0442284	0.718224	0.0147497	1.05401	0.0291058	0.844746	0.118571	0.830892	0.228969	0.89647	0.17661	0.830686	0.119201	0.528178	0.0531	0.979106	0.0535748
9.59	0.0689079	0.998538	0.0250712	0.733663	0.0973562	1.05453	0.0547585	1.21461	0.763728	0.523585	0.0784237	0.447329	0.144654	0.672075	0.118597	0.717441	0.146363	0.77823	0.151587	0.838221	0.283611	1.13465	0.0506913	0.646283	0.0438592	0.841296	0.07731	0.591996	0.0466181	0.61312	0.0573646	0.700259	0.0295118	0.726846	0.0607729	1.06079	0.0510812	0.85354	0.103612	0.820574	0.333714	0.911804	0.13541	0.902112	0.106806	0.516788	0.0403123	0.963415	0.0670332
9.727	0.0907546	1.06993	0.134101	0.749733	0.0669795	1.04842	0.110292	1.18479	0.679379	0.460851	0.0874355	0.501778	0.169337	0.641889	0.19217	0.756211	0.148914	0.730736	0.170607	0.701357	0.280491	1.05907	0.0646228	0.598303	0.050191	0.862678	0.105439	0.593891	0.0824279	0.646192	0.120746	0.696225	0.00911626	0.738891	0.0440996	1.06903	0.0855698	0.859128	0.104713	0.817411	0.400584	0.768347	0.138431	0.927718	0.105515	0.440873	0.0314351	1.1018	0.118137
9.864	0.0615474	1.03565	0.149633	0.661361	0.0497821	1.01802	0.149803	1.1476	0.762807	0.472752	0.191869	0.441865	0.14433	0.689727	0.14561	0.670633	0.213535	0.772522	0.254153	0.778593	0.308138	1.10919	0.0866622	0.589767	0.0769839	0.857405	0.101285	0.66304	0.0899808	0.649721	0.0853479	0.74819	0.020291	0.743938	0.0574252	1.06263	0.154623	0.817859	0.103612	0.847916	0.307913	0.773388	0.149077	0.988546	0.151745	0.45549	0.0415494	1.12615	0.140788
10.001	0.0912417	1.07567	0.11751	0.623255	0.0606685	1.01947	0.0932551	1.09848	0.771197	0.492452	0.213255	0.443151	0.121122	0.684803	0.151755	0.634341	0.185151	0.794081	0.337694	0.780967	0.204875	1.00169	0.0797616	0.609922	0.0495739	0.860527	0.0781817	0.779199	0.078782	0.645653	0.0853479	0.747673	0.0436813	0.725955	0.12887	1.08827	0.177399	0.793872	0.0955906	0.87368	0.174306	0.776619	0.15745	0.965092	0.105515	0.290096	0.0707999	1.15159	0.121708
10.138	0.0836829	1.00831	0.166809	0.629423	0.0583649	1.02028	0.0885565	1.01655	0.853191	0.493722	0.106287	0.535483	0.101755	0.603674	0.106695	0.640736	0.00293276	0.941516	0.164808	0.575389	0.17381	0.888204	0.0701858	0.63662	0.0381858	0.807925	0.0589925	0.85848	0.0690157	0.629208	0.0803109	0.730736	0.0392543	0.676891	0.131995	1.10866	0.151391	0.807002	0.071761	0.833189	0.0900055	0.824065	0.141282	0.931725	0.0728393	0.299052	0.074445	1.10493	0.11715
10.275	0.0793833	0.934932	0.190888	0.583784	0.0704031	0.941273	0.127207	1.01005	0.96833	0.506834	0.0437919	0.589217	0.119333	0.67576	0.0732324	0.591509	0.183321	0.830112	0.230944	0.633793	0.287742	0.826317	0.0673803	0.614355	0.0362906	0.736442	0.0475523	0.877453	0.0862047	0.60684	0.0810102	0.74024	0.0301428	0.644507	0.0465269	1.1156	0.0920339	0.780595	0	0.800311	0.0845065	0.82645	0.144391	0.843387	0.0994419	0.338554	0.0761649	1.01715	0.142516
10.412	0.0575305	0.850199	0.299752	0.553592	0.0154139	0.923607	0.188745	1.02925	1.14816	0.539659	0.156452	0.538455	0.155007	0.704487	0.147194	0.601726	0.240105	0.801789	0.253789	0.580564	0.279632	0.681309	0.0542033	0.654524	0.0140762	0.709045	0.062353	0.917263	0.07774	0.576398	0.13166	0.770141	0.0370852	0.652089	0.0262565	1.04324	0.0783927	0.797761	0.00328483	0.798479	0.0883484	0.809041	0.1237	0.735293	0.0996988	0.268763	0.0797374	1.03026	0.0628919
10.549	0.0589977	0.801353	0.215516	0.55994	0.036555	0.942335	0.178748	0.963483	1.22147	0.524094	0.12737	0.552743	0.127887	0.783492	0.0846976	0.6229	0.285903	0.823883	0.139969	0.586508	0.293777	0.644561	0.0966153	0.574737	0.0202115	0.693718	0.104044	0.970114	0.0712291	0.524368	0.122985	0.773252	0.0498792	0.684793	0.0683824	0.968691	0.0514962	0.778002	0.0871031	0.819232	0.115807	0.800303	0.109998	0.685975	0.131729	0.252172	0.07185	1.07038	0.0673843
10.686	0.109974	0.814027	0.150507	0.548961	0.0515603	0.944753	0.157092	0.898061	1.32181	0.542611	0.140715	0.647509	0.0885031	0.805075	0.265486	0.756422	0.147559	0.793995	0.171024	0.592604	0.268615	0.750686	0.0926848	0.595344	0.0372289	0.671707	0.10714	0.968653	0.0813859	0.52407	0.139215	0.879256	0.0859311	0.69826	0.103504	0.854047	0.0736879	0.805511	0.0676079	0.748235	0.177536	0.856014	0.0882262	0.675486	0.134699	0.220238	0.110738	1.04072	0.0640128
10.823	0.210259	0.793849	0.0932333	0.520927	0.0720538	0.934316	0.11756	0.895081	1.26093	0.492379	0.0928376	0.659778	0.124826	0.819612	0.155635	0.589586	0.156909	0.783432	0.210077	0.559508	0.328175	0.825739	0.111048	0.59046	0.020175	0.644554	0.094858	1.02107	0.084381	0.548887	0.13138	0.845841	0.0845331	0.673029	0.101347	0.788458	0.167405	0.714782	0.0658586	0.778884	0.268391	0.8734	0.0800458	0.623768	0.163758	0.253092	0.121076	1.05756	0.0288216
10.96	0.179765	0.73531	0.131779	0.543929	0.0825845	0.876553	0.148199	0.900139	1.19459	0.453404	0.0875962	0.773546	0.198226	0.793472	0.170513	0.552139	0.117211	0.692288	0.241997	0.569279	0.446235	0.707703	0.161615	0.621627	0.00301008	0.615059	0.1105	1.07989	0.0610723	0.52084	0.090245	0.852697	0.0433432	0.646782	0.0916839	0.77195	0.214711	0.778468	0.00565613	0.793841	0.309502	0.836827	0.10433	0.612834	0.215929	0.260533	0.0949692	0.977124	0
11.097	0.212118	0.747702	0.105926	0.594626	0.0919528	0.902456	0.137682	0.88716	1.25519	0.422952	0.0855194	0.852883	0.19924	0.930753	0.128113	0.729295	0.148263	0.661395	0.281921	0.704132	0.459727	0.660096	0.164421	0.642958	0.0478	0.615448	0.107753	1.09207	0.044404	0.473414	0.154326	0.887552	0.0490856	0.636722	0.0872925	0.758433	0.315529	0.80268	0.0300948	0.72947	0.422226	0.743024	0.0912764	0.597747	0.169568	0.280879	0.1267	0.875206	0.0991128
11.234	0.272931	0.730443	0.0985296	0.657748	0.111863	0.845467	0.182613	0.899752	1.16908	0.39377	0.128934	0.869182	0.168578	0.953541	0.201429	0.745049	0.159783	0.614872	0.237053	0.540853	0.54783	0.717473	0.154756	0.652931	0.0713967	0.598683	0.107867	1.07792	0.0760472	0.481189	0.172515	0.901955	0.0829315	0.614206	0.0886837	0.732531	0.424944	0.798736	0.0990633	0.757441	0.500152	0.755437	0.124921	0.517	0.109131	0.254345	0.186595	1.0121	0.0435197
11.371	0.173752	0.796525	0.0218934	0.737953	0.130445	0.881079	0.228936	0.959057	1.07003	0.362368	0.0906001	0.858482	0.203546	1.07027	0.176849	0.633665	0.216895	0.590134	0.226348	0.505196	0.665621	0.640358	0.149694	0.637191	0.0764295	0.55349	0.116067	1.01923	0.114071	0.49985	0.161181	0.782296	0.0810014	0.590327	0.0735667	0.771906	0.418556	0.746936	0.0520779	0.653759	0.598549	0.644183	0.116723	0.445416	0.190493	0.260402	0.219485	0.936911	0.116495
11.508	0.191985	0.817119	0.107946	0.700172	0.115323	0.909524	0.314498	0.940369	0.717493	0.340875	0.0485945	0.812399	0.136629	1.1059	0.10385	0.561904	0.211001	0.610238	0.329627	0.575329	0.743782	0.548361	0.188717	0.600157	0.0851116	0.533949	0.126594	0.915946	0.0994867	0.480831	0.191543	0.755507	0.0768292	0.633531	0.10105	0.805146	0.359059	0.755464	0.0571833	0.695743	0.661223	0.696219	0.133394	0.408676	0.191263	0.234459	0.332039	0.903966	0.106008
11.645	0.198052	0.796293	0.0981601	0.679916	0.135498	0.903635	0.379779	0.892531	0.45059	0.33687	0.0780528	0.875622	0.0721438	1.13745	0.137241	0.540644	0.180148	0.632784	0.353148	0.580753	0.758132	0.520862	0.177049	0.554914	0.0799374	0.51898	0.115592	0.872763	0.0837302	0.468512	0.216868	0.699511	0.0812336	0.719967	0.134494	0.757894	0.285891	0.741167	0.0464995	0.737243	0.662853	0.691075	0.116314	0.492701	0.148129	0.279495	0.368694	0.800579	0.166657
11.782	0.14852	0.945865	0.210454	0.694309	0.105408	0.878082	0.385508	0.90766	0.319286	0.2847	0.116888	0.75351	0.053106	1.13134	0.159412	0.610649	0.194929	0.616501	0.547413	0.529081	0.75902	0.44509	0.104984	0.572454	0.0835245	0.508509	0.0756929	0.849472	0.0876365	0.50571	0.219665	0.613844	0.0777751	0.713741	0.0632543	0.749319	0.153507	0.726783	0.0387571	0.778624	0.725717	0.692041	0.116957	0.446833	0.136892	0.273505	0.439663	0.723018	0.0708301
11.919	0.136018	1.08553	0.238906	0.589857	0.0880994	0.802839	0.269636	0.925768	0.322858	0.313652	0.0661545	0.700225	0.107708	1.14867	0	0.701607	0.268606	0.703777	0.45333	0.52053	0.665875	0.443457	0.100299	0.59046	0.0644761	0.566063	0.0971305	0.811181	0.0907618	0.489145	0.166638	0.537049	0.069783	0.663058	0.0508203	0.749687	0.0717475	0.671105	0.0877899	0.823052	0.823254	0.588666	0.158859	0.475334	0.233884	0.220238	0.570515	0.658497	0.139913
12.056	0.118104	1.14305	0.275839	0.500634	0.0788425	0.807821	0.21338	1.01992	0.222148	0.321929	0.0749315	0.671536	0.122597	1.287	0.138891	0.662027	0.351527	0.732129	0.390893	0.430277	0.499809	0.365837	0.1658	0.643026	0.0759056	0.613571	0.0395026	0.766156	0.0836	0.439864	0.237855	0.561588	0.0533508	0.681349	0.125192	0.776515	0.108463	0.635725	0.118086	0.881512	0.88683	0.596424	0.137029	0.515941	0.274825	0.162036	0.692907	0.680151	0.121303
12.193	0.173908	1.27039	0.174088	0.446269	0.0532482	0.812141	0.222793	0.988716	0.295912	0.274193	0.0062551	0.630159	0.151063	1.22793	0.118029	0.616127	0.345069	0.67485	0.309721	0.350971	0.426015	0.290883	0.187133	0.637018	0.0975304	0.649976	0	0.761656	0.103523	0.415644	0.24415	0.512102	0.0722328	0.688385	0.102899	0.856337	0.135091	0.681708	0.122595	0.905629	0.855762	0.582181	0.13468	0.434651	0.293551	0.257373	0.665485	0.69107	0.197605
12.33	0.0869421	1.27583	0.307629	0.483871	0.0488267	0.810616	0.148534	0.878466	0.286865	0.256336	0.0536443	0.663189	0.076643	1.2154	0.141796	0.651062	0.30743	0.706336	0.260896	0.427717	0.515991	0.399348	0.229627	0.62232	0.147579	0.676449	0.0627377	0.788266	0.175013	0.395969	0.238414	0.506685	0.0819651	0.654372	0.120849	0.963926	0.105716	0.697336	0.10687	0.900122	0.774095	0.586329	0.0964651	0.501234	0.319119	0.306949	0.591034	0.641199	0.121555
12.467	0.0883974	1.22535	0.213909	0.467485	0.0257801	0.860537	0.186744	0.825857	0.364934	0.208308	0.157861	0.659113	0.0507047	1.15548	0.217766	0.702264	0.231043	0.68281	0.191885	0.544233	0.528274	0.380286	0.308003	0.641331	0.158477	0.783154	0.0991143	0.792525	0.213428	0.389569	0.216028	0.491362	0.0722055	0.654446	0.191772	0.999765	0.161397	0.670981	0.0916319	0.849119	0.708276	0.599284	0.097254	0.530486	0.359283	0.195151	0.510705	0.564311	0.105684
12.604	0.120942	1.17771	0.287059	0.458426	0.0182536	0.892618	0.238625	0.834992	0.520096	0.219775	0.188191	0.689907	0.0328336	1.12487	0.214024	0.761642	0.136004	0.642985	0.241886	0.520154	0.52883	0.398952	0.321557	0.675715	0.150085	0.835841	0.101375	0.800277	0.199755	0.341427	0.224423	0.492283	0.0882341	0.657186	0.229612	1.0678	0.182969	0.655155	0.10641	0.855493	0.841608	0.728968	0.0672258	0.439299	0.38447	0.240977	0.462728	0.512811	0.272527
12.741	0.232774	1.08319	0.44452	0.490722	0.130504	0.955506	0.237059	0.765311	0.451595	0.242675	0.10931	0.628854	0	1.08385	0.152556	0.892803	0.230932	0.61859	0.31803	0.507941	0.577847	0.368635	0.310726	0.67937	0.15654	0.847788	0.0883113	0.825043	0.216683	0.314693	0.223023	0.541195	0.0947844	0.657733	0.224891	1.10501	0.130631	0.664032	0.148899	0.953905	0.834732	0.623612	0.103395	0.41344	0.38227	0.289371	0.471117	0.500136	0.151745
12.878	0.215966	0.987002	0.448695	0.533037	0.114023	0.941983	0.288956	0.77118	0.404998	0.217971	0.145474	0.675046	0.0790809	1.05101	0.226978	1.06732	0.252423	0.679718	0.376948	0.560875	0.722983	0.408465	0.247276	0.662281	0.141881	0.84869	0.0935715	0.809673	0.208089	0.343101	0.149289	0.50277	0.0634321	0.685648	0.214467	1.07417	0.138925	0.65387	0.138987	0.930281	0.882719	0.633321	0.171322	0.469677	0.366904	0.284237	0.402531	0.521057	0.166847
13.015	0.266263	0.773058	0.432591	0.527003	0.105971	0.92158	0.331986	0.826199	0.383128	0.168326	0.107085	0.609956	0.0985111	0.931401	0.350841	0.990791	0.205581	0.646305	0.394037	0.531923	0.818703	0.426184	0.264884	0.646402	0.116962	0.836391	0.113813	0.814759	0.194677	0.32546	0.14635	0.492858	0.0552405	0.700955	0.223797	1.0908	0.163168	0.626641	0.0955776	0.81721	0.830906	0.692916	0.163019	0.540153	0.329065	0.214181	0.355858	0.539508	0.179895
13.152	0.135501	0.728388	0.438226	0.515459	0.147988	0.908149	0.307415	0.839369	0.406023	0.1416	0.13302	0.653426	0.0838103	0.91019	0.295608	1.05084	0.33823	0.593572	0.316611	0.588958	0.849168	0.43862	0.274542	0.636793	0.111278	0.856788	0.0969741	0.843618	0.205745	0.305782	0.182308	0.400969	0.108834	0.747797	0.248545	0.965954	0.141777	0.639471	0.0924224	0.787014	0.839524	0.661144	0.211249	0.556118	0.40629	0.337171	0.326451	0.513246	0.2624
13.289	0.212484	0.609021	0.517134	0.587198	0.189118	0.854557	0.26387	0.839656	0.524772	0.0976676	0.189446	0.665783	0.117894	0.903964	0.369611	0.869712	0.351392	0.521675	0.213501	0.663284	0.733709	0.435597	0.237906	0.622456	0.118285	0.912094	0.0911308	0.825194	0.173451	0.276419	0.188325	0.311615	0.128325	0.746356	0.311213	0.824839	0.123138	0.648663	0.0790303	0.767258	0.858042	0.652352	0.192989	0.626097	0.517878	0.21912	0.209232	0.52616	0.228407
13.426	0.249485	0.529333	0.501215	0.626854	0.13354	0.807405	0.250262	0.851535	0.583999	0.118074	0.122228	0.617436	0.103706	0.896594	0.284322	0.78111	0.381318	0.527986	0.161769	0.635252	0.552398	0.488279	0.208877	0.587862	0.127087	0.914512	0.120913	0.904044	0.19064	0.170205	0.19546	0.253832	0.0938501	0.744073	0.32368	0.676805	0.170053	0.655377	0.0656189	0.716411	0.825148	0.684608	0.216116	0.759309	0.475257	0.145904	0.273321	0.438222	0.27588
13.563	0.225582	0.445225	0.478675	0.669883	0.174792	0.823627	0.270066	0.827558	0.530309	0.0725372	0.0804819	0.650761	0.166721	0.880155	0.362223	0.749226	0.429181	0.376843	0.212203	0.745808	0.503131	0.429648	0.213562	0.545875	0.193618	0.878328	0.124652	1.02361	0.169935	0.185994	0.168877	0.219613	0.0908908	0.805842	0.338886	0.508126	0.149018	0.648085	0.060047	0.705892	0.763113	0.618513	0.203425	0.736028	0.443484	0.0493814	0.324562	0.505421	0.379666
13.7	0.242912	0.390083	0.485985	0.637576	0.222738	0.767039	0.290883	0.845245	0.47519	0.0359297	0.107159	0.686718	0.260586	0.790913	0.515299	0.742699	0.328792	0.265422	0.278639	0.911908	0.510155	0.515999	0.27505	0.530343	0.165646	0.861032	0.104086	1.02403	0.203531	0.18707	0.226941	0.187465	0.0916858	0.801043	0.3214	0.43817	0.196113	0.526041	0.0543131	0.768654	0.701325	0.639993	0.290681	0.749358	0.530919	0.0997499	0.479825	0.493735	0.24337
13.837	0.283906	0.380354	0.421339	0.545899	0.264011	0.727086	0.312422	0.939085	0.487364	0.05187	0.114922	0.701984	0.275376	0.786834	0.491938	0.685344	0.424523	0.310507	0.292246	0.960341	0.536768	0.466924	0.374677	0.546446	0.131174	0.860895	0.11329	1.01777	0.207438	0.181089	0.262339	0.164131	0.0892667	0.752266	0.338399	0.439953	0.279392	0.538691	0.09469	0.827036	0.624429	0.659505	0.356352	0.752611	0.538796	0.13122	0.599675	0.450518	0.248994
13.974	0.246953	0.404688	0.423224	0.482474	0.204426	0.661968	0.288775	0.960451	0.623231	0.02875	0.11805	0.631767	0.265834	0.857979	0.531887	0.721708	0.296203	0.333117	0.363041	0.981697	0.553189	0.440471	0.463513	0.503574	0.141673	0.808056	0.126552	0.986572	0.227361	0.128581	0.27759	0.162	0.10472	0.701824	0.339352	0.471801	0.276376	0.552221	0.121014	0.874935	0.500046	0.58953	0.265134	0.658217	0.521362	0.141821	0.694675	0.427533	0.291581
14.111	0.322482	0.402109	0.455211	0.428416	0.244484	0.661146	0.23459	1.00029	0.783722	0.022631	0.116603	0.675801	0.217499	0.785946	0.377986	0.664338	0.309981	0.270819	0.434062	0.896923	0.686233	0.472167	0.587738	0.479057	0.17978	0.718842	0.130718	0.947541	0.207307	0.0518511	0.273813	0.155606	0.125045	0.684218	0.375588	0.450735	0.188498	0.538247	0.105886	0.926654	0.472762	0.552394	0.208555	0.631012	0.766871	0.219644	0.754516	0.283513	0.300101
14.248	0.321159	0.391848	0.52506	0.367163	0.293449	0.639539	0.223743	1.01766	0.77725	0.0471999	0.136592	0.754577	0.256265	0.841852	0.457991	0.601656	0.260781	0.263775	0.503173	0.792181	0.678247	0.462354	0.696316	0.457139	0.203087	0.664763	0.142825	0.963486	0.231268	0.0423418	0.250027	0.148577	0.139084	0.661375	0.462328	0.46945	0.159877	0.502807	0.104616	0.989243	0.477523	0.594857	0.238396	0.584167	0.824206	0.168355	0.922505	0.366642	0.328402
14.385	0.227169	0.360295	0.349328	0.266945	0.309733	0.624283	0.236023	0.965165	0.663225	0.0178937	0.0610305	0.705852	0.328806	0.885391	0.367955	0.534378	0.279721	0.260482	0.599825	0.793028	0.649189	0.461595	0.687406	0.457865	0.188267	0.668175	0.187648	0.966049	0.243508	0.0852228	0.213089	0.130027	0.12938	0.589916	0.543969	0.452137	0.185564	0.503435	0.110201	1.05732	0.565275	0.607709	0.223969	0.577971	1.02115	0.231695	0.881596	0.492173	0.363759
14.522	0.169001	0.371325	0.44532	0.250607	0.310476	0.644853	0.218307	0.963215	0.584046	0	0.091861	0.67249	0.194678	0.800289	0.431737	0.484275	0.404111	0.180822	0.614477	0.646455	0.566692	0.427002	0.64236	0.463405	0.165729	0.647537	0.182791	0.913504	0.229314	0.120745	0.172375	0.07662	0.122744	0.562522	0.566689	0.45278	0.210754	0.516298	0.0650099	1.11623	0.630978	0.540495	0.270534	0.568326	0.786887	0.294703	0.775227	0.380358	0.333465
14.659	0.154804	0.34829	0.623842	0.259341	0.313746	0.60221	0.195929	0.943484	0.563779	0.0142922	0.0791036	0.676771	0.432884	0.927757	0.610995	0.450205	0.439551	0.239865	0.554482	0.503937	0.651868	0.435419	0.63655	0.433331	0.160706	0.614291	0.138515	0.843772	0.206917	0.0783451	0.24555	0.0370425	0.170466	0.570687	0.534533	0.480845	0.199164	0.515435	0.159609	1.07139	0.677213	0.511042	0.31216	0.544193	0.520328	0.401105	0.792649	0.359136	0.37821
14.796	0.172718	0.436133	0.626725	0.243143	0.263497	0.616061	0.210178	0.931057	0.527804	0.0225922	0.106096	0.649591	0.38151	0.834575	0.69904	0.419581	0.413402	0.288534	0.503811	0.449487	0.748391	0.452264	0.745841	0.423478	0.133038	0.601985	0.0847524	0.824908	0.250801	0.0708696	0.312568	0.0777746	0.199746	0.51918	0.463805	0.474179	0.179123	0.477784	0.155359	0.973601	0.787341	0.513304	0.230151	0.520743	0.418304	0.379245	0.845653	0.315316	0.440699
14.933	0.19816	0.365233	0.287688	0.288612	0.288703	0.726989	0.187126	0.890089	0.494315	0.0391069	0.0987837	0.595305	0.440365	0.694742	0.705257	0.421828	0.404393	0.327579	0.569213	0.421618	0.961634	0.357796	0.692639	0.35938	0.144507	0.595543	0.106394	0.791157	0.236607	0.0896478	0.337334	0.0478741	0.19177	0.442769	0.38833	0.478647	0.186692	0.447537	0.190112	0.923995	0.800133	0.523152	0.255558	0.483411	0.281926	0.38583	0.799414	0.302042	0.402568
15.07	0.293155	0.366987	0.280242	0.123441	0.20217	0.741001	0.183187	0.866314	0.530267	0.0281161	0.0948526	0.660435	0.500403	0.548323	0.647226	0.309341	0.482827	0.295038	0.588946	0.419058	1.09255	0.476905	0.557707	0.277413	0.205982	0.589482	0.166487	0.784896	0.278667	0.0745179	0.372871	0.0120963	0.207352	0.369871	0.373776	0.481882	0.210391	0.427274	0.22471	0.935913	0.778897	0.527724	0.389875	0.480332	0.22652	0.384709	0.869315	0.307052	0.369752
15.207	0.232178	0.400221	0.370156	0.212582	0.191326	0.714556	0.202857	0.814772	0.537928	0.020393	0.109594	0.657031	0.595639	0.530341	0.610906	0.307079	0.525281	0.258374	0.536549	0.475551	0.975207	0.459995	0.499525	0.201074	0.224548	0.552721	0.196125	0.759172	0.236737	0.0243402	0.300676	0.0260387	0.199886	0.323881	0.363873	0.426424	0.20436	0.446693	0.176429	0.912813	0.767192	0.565584	0.574017	0.454228	0.175383	0.365417	0.714662	0.308689	0.379422
15.344	0.262396	0.481345	0.487383	0.202171	0.138566	0.726461	0.207641	0.785902	0.450171	0.051619	0.100286	0.615272	0.692283	0.422463	0.656802	0.333524	0.380772	0.257125	0.480955	0.457543	0.834553	0.437699	0.426122	0.196451	0.212779	0.491866	0.218428	0.686064	0.223455	0.0194962	0.235615	0.00742996	0.197181	0.288046	0.283871	0.457574	0.229614	0.46013	0.254759	0.895854	0.793104	0.529679	0.762822	0.418373	0.209086	0.404396	0.69042	0.342653	0.295559
15.481	0.412419	0.556237	0.666632	0.170469	0.183386	0.752285	0.252652	0.74621	0.360817	0.0684907	0.130894	0.62926	0.711912	0.341656	0.744064	0.381801	0.37205	0.266946	0.482496	0.512848	0.755433	0.444242	0.398012	0.15777	0.192073	0.475727	0.250085	0.692765	0.271506	0.00974955	0.242611	0.013423	0.251186	0.250661	0.24273	0.484275	0.22661	0.490826	0.201107	0.700903	0.929534	0.548078	0.820558	0.366934	0.221357	0.334145	0.713292	0.346558	0.315734
15.618	0.452577	0.504082	0.509541	0.179198	0.200954	0.800547	0.32304	0.69546	0.314346	0.0819705	0.139102	0.699878	0.571537	0.328943	0.733047	0.401726	0.500494	0.328781	0.449621	0.484289	0.665748	0.359908	0.420264	0.146307	0.256486	0.456551	0.275887	0.717525	0.170847	0.0383359	0.22904	0	0.269572	0.242393	0.288565	0.511986	0.222998	0.499672	0.200433	0.680402	0.865747	0.563166	0.938772	0.329892	0.145158	0.291151	0.7616	0.279452	0.287218
15.755	0.47909	0.570046	0.356324	0.156812	0.128152	0.817027	0.36459	0.624555	0.298789	0.0734169	0.123174	0.718795	0.545813	0.306654	0.62319	0.38064	0.531006	0.270463	0.516933	0.437596	0.721953	0.356189	0.44858	0.151676	0.289665	0.424553	0.284989	0.698507	0.174623	0.0199152	0.291302	0.0105408	0.259796	0.227605	0.346423	0.531464	0.29706	0.57193	0.203258	0.709406	0.768654	0.502217	0.988754	0.216815	0.146449	0.29194	0.830041	0.257255	0.266375
15.892	0.516307	0.47529	0.455747	0.161177	0.0967617	0.813368	0.3682	0.599941	0.30143	0.0761905	0.20627	0.777839	0.59802	0.328367	0.580904	0.42249	0.51995	0.316197	0.615664	0.413325	0.885178	0.374439	0.484345	0.116528	0.243697	0.415419	0.256013	0.692053	0.209782	0.0137554	0.273533	0.0253471	0.258039	0.206023	0.399044	0.575522	0.357919	0.64353	0.197466	0.746941	0.742705	0.495007	1.07516	0.126276	0.0807167	0.241504	0.821001	0.233873	0.314321
16.029	0.330859	0.464515	0.457816	0.16326	0.0705198	0.820972	0.439496	0.605621	0.252079	0.102358	0.170699	0.709825	0.637225	0.331425	0.601587	0.500899	0.653203	0.391518	0.787959	0.462393	0.807372	0.317933	0.475689	0.0648958	0.231094	0.40483	0.243713	0.738135	0.214079	0.000659347	0.165099	0.0587057	0.229607	0.205263	0.335456	0.575828	0.318895	0.703138	0.184735	0.726214	0.74213	0.539581	1.07181	0.151879	0.109901	0.258559	0.896797	0.231172	0.335403
16.166	0.290334	0.407274	0.463069	0.150439	0.144469	0.770273	0.452498	0.659931	0.227257	0.0972458	0.218657	0.718559	0.661066	0.384708	0.720183	0.495892	0.656746	0.309596	1.02877	0.466543	0.637291	0.29352	0.521819	0.0408275	0.203928	0.409699	0.241759	0.780197	0.251582	0	0.197978	0.0739128	0.206295	0.213648	0.349795	0.524433	0.275172	0.740422	0.172936	0.716074	0.729	0.459791	1.12274	0.135258	0.137538	0.26152	1.02315	0.251632	0.396305
16.303	0.24551	0.370848	0.400308	0.159162	0.139193	0.792177	0.431931	0.588108	0.276722	0.0943119	0.286412	0.793109	0.908112	0.439257	0.908761	0.420869	0.65942	0.277818	1.08553	0.460639	0.71313	0.304666	0.525289	0.0320674	0.188834	0.385067	0.222137	0.756183	0.218897	0.0529881	0.182728	0.105829	0.229311	0.239806	0.348389	0.496171	0.266867	0.732217	0.203692	0.745163	0.712777	0.418352	1.05458	0.0691082	0.170088	0.343295	1.10311	0.258386	0.46445
16.44	0.252378	0.36158	0.293643	0.142306	0.136109	0.778861	0.511255	0.519704	0.320753	0.059267	0.203588	0.815227	0.822042	0.406044	0.910829	0.434036	0.688419	0.242263	1.20894	0.470711	0.67762	0.358578	0.440342	0.0280835	0.18317	0.360059	0.187834	0.698647	0.233091	0.0912038	0.165378	0.0858397	0.251028	0.23933	0.331988	0.514379	0.290812	0.748964	0.210333	0.737991	0.684179	0.374521	1.07294	0.0668167	0.257905	0.370159	1.19226	0.23584	0.407252
16.577	0.373404	0.346391	0.338249	0.178949	0.18717	0.798244	0.63422	0.474501	0.304462	0.0470085	0.143985	0.717284	0.907736	0.448572	0.787211	0.449825	0.678448	0.350254	1.05671	0.422945	0.585065	0.221199	0.351382	0.0343163	0.159506	0.342565	0.173569	0.692549	0.181524	0.0732022	0.156844	0.198525	0.195419	0.179865	0.292984	0.510324	0.412308	0.707284	0.203718	0.711549	0.671878	0.248053	0.986867	0.120883	0.155749	0.443307	1.24115	0.311285	0.454687
16.714	0.485163	0.365712	0.32345	0.161149	0.165206	0.789051	0.673508	0.383673	0.261479	0.00498571	0.175526	0.78129	1.02319	0.447049	0.722449	0.398111	0.640052	0.34635	0.979596	0.448204	0.519731	0.191083	0.356019	0.0428351	0.105999	0.339959	0.195301	0.725917	0.25054	0.120209	0.14831	0.321179	0.0952222	0.167561	0.302194	0.541251	0.512022	0.6723	0.219319	0.657715	0.817227	0.251575	0.904256	0.147816	0.0463619	0.450288	1.09987	0.325102	0.507645
16.851	0.673474	0.300552	0.401115	0.0671302	0.141724	0.783429	0.701949	0.306756	0.344427	0.0103233	0.212921	0.767104	1.12883	0.441478	0.686105	0.422821	0.64837	0.414654	0.828959	0.446299	0.529856	0.204255	0.401696	0.0438403	0.130796	0.341772	0.22486	0.746361	0.143761	0.169666	0.22834	0.406327	0.0926447	0.204035	0.360282	0.571269	0.562788	0.659606	0.279075	0.634182	0.82794	0.24888	0.877132	0.140327	0.069612	0.518894	1.03178	0.256638	0.463181
16.988	0.63055	0.227048	0.32842	0.051833	0.126931	0.782752	0.731855	0.275304	0.400566	0.093885	0.216506	0.786583	1.01191	0.38167	0.648153	0.362359	0.728106	0.44681	0.97871	0.430643	0.622251	0.239211	0.465441	0.0291909	0.178943	0.339692	0.249484	0.708374	0.140766	0.234915	0.199378	0.458755	0.144014	0.209754	0.408859	0.531874	0.465874	0.640272	0.311055	0.623974	0.897443	0.244828	0.909199	0.058947	0.0752961	0.604289	1.03475	0.262459	0.451104
17.125	0.770122	0.272963	0.328044	0.0162347	0.144309	0.825601	0.77092	0.25156	0.422624	0.0230036	0.206524	0.709313	0.932847	0.464645	0.566946	0.339008	0.705635	0.489266	0.80672	0.461971	0.66748	0.255178	0.518183	0	0.181143	0.347999	0.269665	0.675065	0.071099	0.244483	0.141313	0.541368	0.155825	0.201074	0.448856	0.539677	0.50076	0.651686	0.308956	0.645766	0.90348	0.234586	1.16838	0.0591166	0.064962	0.609624	0.956916	0.270607	0.507257
17.262	0.951378	0.268762	0.340016	0	0.121634	0.856931	0.703239	0.272223	0.506	0.040548	0.244796	0.664221	0.535068	0.347434	0.46352	0.358247	0.542896	0.439656	0.683577	0.51193	0.746469	0.167369	0.475977	0.0346628	0.188008	0.345812	0.283155	0.682756	0.0894601	0.301237	0.136696	0.566774	0.129937	0.197614	0.42381	0.532207	0.474009	0.654034	0.403613	0.61608	0.935962	0.252092	1.22584	0.0773849	0.110678	0.58625	0.861934	0.295552	0.492396
17.399	0.954445	0.302485	0.234546	0.00139371	0.187393	0.814256	0.655414	0.261654	0.55012	0.0361574	0.35918	0.646248	0.682981	0.448963	0.39874	0.320948	0.460286	0.461344	0.516801	0.420714	0.837867	0.134548	0.485011	0.0250707	0.18714	0.326451	0.283378	0.634422	0.0714895	0.335684	0.122565	0.539756	0.13904	0.175453	0.442628	0.495856	0.451297	0.585221	0.561136	0.542495	0.863303	0.269821	1.22696	0.127844	0.0928555	0.464247	0.584999	0.294135	0.448512
17.536	0.863354	0.319713	0.318714	0.0249916	0.158593	0.859864	0.715816	0.245012	0.512787	0.0424108	0.390258	0.705416	0.616226	0.461436	0.408209	0.343877	0.492863	0.4346	0.418809	0.440541	0.865361	0.163746	0.433318	0.0147857	0.180728	0.302323	0.299772	0.536058	0.0992264	0.358409	0.174893	0.562915	0.180875	0.155301	0.467124	0.476861	0.432256	0.547411	0.765703	0.524832	0.670521	0.271081	1.00562	0.11059	0.0802029	0.365814	0.490277	0.233687	0.430157
17.673	0.581216	0.238434	0.211938	0.0484075	0.222648	0.865955	0.791402	0.253409	0.460291	0.0466695	0.330606	0.675858	0.592422	0.485518	0.357172	0.345908	0.512195	0.383773	0.400052	0.356552	0.808735	0.167033	0.379362	0.0251246	0.234352	0.304805	0.306216	0.499761	0.10131	0.356197	0.190004	0.499255	0.239603	0.154651	0.414836	0.460492	0.450239	0.53939	0.926634	0.523102	0.672579	0.2632	0.8196	0.0774716	0.0424891	0.361468	0.51887	0.260499	0.44199
17.81	0.451224	0.246248	0.333359	0.0891832	0.243401	0.871841	0.860512	0.268473			0.281245	0.625729	0.552301	0.611888	0.33729	0.309616	0.510283	0.368116	0.256279	0.286942	0.926798	0.175889	0.302817	0.0214701	0.283861	0.333507	0.290417	0.486208	0.101049	0.317744	0.193362	0.391868	0.210414	0.164803	0.338558	0.438509	0.438556	0.502791	0.983804	0.48816	0.622877	0.254186	0.604045	0.0816778	0.0312526	0.273636	0.512394	0.295582	0.464007
17.947	0.415299	0.286153	0.325538	0.0647849	0.246671	0.865841	0.869686	0.229268			0.415754	0.554202	0.522114	0.512843	0.364231	0.301627	0.594336	0.386088	0.364845	0.286311	1.17821	0.231197	0.322854	0.0261781	0.294092	0.305166	0.29397	0.502809	0.10717	0.36493	0.122705	0.353327	0.188505	0.121965	0.301526	0.4357	0.447405	0.454019	1.08826	0.403815	0.548123	0.23649	0.72563	0.0811878	0.168922	0.289371	0.622306	0.283562	0.507493
18.084	0.397596	0.295216	0.296808	0.100926	0.332281	0.826375	0.829872	0.213563			0.296543	0.606484	0.36684	0.473322	0.318215	0.323802	0.549582	0.354165	0.464304	0.317518	1.37603	0.223664	0.390988	0.0383343	0.254914	0.311919	0.3063	0.479229	0.0666714	0.305782	0.0926233	0.319971	0.18674	0.0876961	0.310818	0.414083	0.463629	0.376392	1.2047	0.373359	0.549189	0.21431	0.601778	0.0565839	0.102156	0.374702	0.640875	0.296839	0.478765
18.221	0.391594	0.277986	0.223159	0.0953793	0.376161	0.793886	0.799186	0.188597			0.364335	0.610874	0.39518	0.546537	0.318729	0.288987	0.562293	0.304155	0.396	0.303207	1.43504	0.311423	0.430643	0.049917	0.237387	0.30978	0.355301	0.453917	0.0457063	0.266071	0.120046	0.311903	0.150402	0.11378	0.291734	0.360254	0.440801	0.345228	1.4211	0.336435	0.49165	0.282036	0.504874	0.0203639	0.105515	0.378258	0.782046	0.228636	0.376863
18.358	0.438301	0.350081	0.240951	0.112521	0.356819	0.769694	0.807293	0.160455			0.36054	0.577526	0.481329	0.507653	0.470341	0.379775	0.589145	0.289569	0.331221	0.315136	1.68776	0.316122	0.490032	0.0790568	0.265669	0.333893	0.396181	0.430531	0.034898	0.223073	0.181749	0.33443	0.175571	0.136217	0.31952	0.338265	0.390666	0.394	1.41646	0.30439	0.434913	0.319071	0.484435	0	0.132763	0.410454	0.686407	0.251892	0.276886
18.495	0.382304	0.341984	0.319336	0.140706	0.366532	0.772155	0.819159	0.171881			0.439032	0.617299	0.577831	0.561783	0.656396	0.360549	0.754981	0.274419	0.431033	0.353247	1.90997	0.316119	0.529055	0.0692404	0.290119	0.306381	0.3372	0.378227	0.0664111	0.211771	0.164679	0.334774	0.2315	0.115331	0.271877	0.334517	0.406476	0.413443	1.45698	0.229766	0.443299	0.309994	0.390331	0.00957701	0.104869	0.465365	0.584631	0.222615	0.213686
18.632	0.421938	0.296412	0.262259	0.165585	0.451505	0.83392	0.918493	0.194995			0.55273	0.63095	0.502872	0.499956	0.785866	0.305367	0.838313	0.280651	0.261476	0.418007	1.97721	0.329225	0.551431	0.0573113	0.276527	0.326837	0.333401	0.307884	0.086465	0.268047	0.188325	0.322215	0.268674	0.109658	0.206149	0.334718	0.331917	0.42081	1.50046	0.178905	0.486325	0.362737	0.399206	0.00792996	0.0932441	0.53022	0.562272	0.189718	0.190816
18.769	0.447585	0.346702	0.263737	0.161552	0.645644	0.815704	0.935009	0.176381			0.479937	0.711331	0.564679	0.338989	0.780444	0.345524	0.739913	0.256994	0.282132	0.264194	2.06681	0.297575	0.48355	0.0835944	0.237208	0.299049	0.339316	0.288415	0.0737036	0.263203	0.151527	0.353846	0.280768	0.0989345	0.205782	0.316551	0.307791	0.436513	1.24377	0.108622	0.371838	0.403153	0.461956	0.051703	0.118813	0.484918	0.396816	0.165867	0.212109
18.906	0.355321	0.320084	0.392468	0.239569	0.826551	0.748372	0.93819	0.188071			0.58204	0.75288	0.575895	0.291525	0.647836	0.380041	0.650874	0.285062	0.273843	0.302113	2.04105	0.297218	0.45214	0.0837336	0.264322	0.30314	0.353666	0.283111	0.1017	0.256504	0.137396	0.358281	0.235346	0.0737918	0.187079	0.231218	0.278819	0.469637	0.905026	0.0890137	0.348243	0.394852	0.433173	0.0962977	0.141674	0.413415	0.38628	0.200764	0.208425
19.043	0.21032	0.276179	0.345688	0.318381	0.961269	0.67114	0.923064	0.193815			0.512134	0.671699	0.54461	0.298222	0.364721	0.330665	0.698731	0.298068	0.367699	0.34193	1.83931	0.282855	0.403411	0.0791278	0.336495	0.278101	0.406791	0.261906	0.145454	0.293105	0.0675783	0.300843	0.197754	0.0574843	0.203118	0.2076	0.265809	0.465422	0.720648	0.0688755	0.353515	0.340442	0.497652	0.0786287	0.135345	0.256517	0.329408	0.182484	0.183277
19.18	0.238607	0.245218			1.23185	0.641056	0.8258	0.164797			0.482366	0.581569	0.528235	0.2609	0.399075	0.312017	0.476146	0.26415	0.256585	0.195236	1.70237	0.284023	0.337286	0.0781566	0.355769	0.266692	0.492746	0.254235	0.108602	0.335983	0.127882	0.298999	0.165635	0.0258349	0.215664	0.273882	0.311858	0.498601	0.579426	0.065404	0.336274	0.333109	0.631864	0.0647136	0.0804598	0.281339	0.263683	0.157238	0.179914
19.317	0.315567	0.16184			1.70657	0.635076	0.684444	0.154376			0.409629	0.572455	0.510034	0.261913	0.474627	0.223255	0.506682	0.257201	0.166697	0.229219	1.58322	0.261632	0.324486	0.0651201	0.29789	0.250304	0.611446	0.260608	0.108341	0.317744	0.186926	0.331031	0.15653	0.0241204	0.204187	0.268227	0.327002	0.572174	0.533588	0.0776506	0.319993	0.335151	0.67362	0.0595727	0.0843326	0.269422	0.224137	0.166395	0.193395
19.454	0.21685	0.261337			1.78591	0.58655	0.692334	0.126224			0.356436	0.494187	0.431513	0.253341	0.422107	0.281294	0.591738	0.254601	0.189806	0.324961	1.65143	0.240835	0.307502	0.0998709	0.235227	0.27308	0.738232	0.277977	0.0983146	0.317146	0.17909	0.307412	0.171543	0.0600898	0.236738	0.208976	0.311666	0.60883	0.548424	0.0644214	0.391153	0.321598	0.708924	0.0620451	0.0940213	0.313665	0.24544	0.175566	0.224337
19.591	0.269191	0.264021			1.59387	0.515473	0.68042	0.114608			0.334951	0.473568	0.402991	0.283849	0.310564	0.269261	0.68951	0.381676	0.250259	0.230914	1.44671	0.296146	0.290772	0.154669	0.235898	0.266063	0.777801	0.278176	0.117196	0.312422	0.143972	0.263684	0.157829	0.0907098	0.244468	0.184733	0.302531	0.637074	0.582808	0.0444191	0.398014	0.272837	0.614522	0.0661835	0.127599	0.309125	0.259278	0.182599	0.257489
19.728	0.314809	0.272391			1.49906	0.572793	0.683282	0.130876			0.328004	0.434465	0.494962	0.236006	0.285296	0.29868	0.586101	0.282889	0.251399	0.265723	1.34088	0.217748	0.303325	0.234612	0.256004	0.237015	0.751963	0.273558	0.0867253	0.286347	0.115709	0.269734	0.185858	0.126214	0.272957	0.207641	0.339556	0.716416	0.625751	0.0912139	0.374318	0.261107	0.560981	0.0860461	0.0800712	0.301815	0.195822	0.176734	0.259302
19.865	0.297953	0.295068			1.54761	0.728141	0.789491	0.159488			0.282394	0.402516	0.559206	0.229987	0.365744	0.304438	0.580365	0.19296	0.209143	0.252341	1.45752	0.217117	0.306878	0.257104	0.220681	0.264839	0.712484	0.278616	0.0510457	0.291789	0.128022	0.271518	0.215513	0.0829963	0.255247	0.210891	0.316283	0.722094	0.54869	0.11347	0.322389	0.237303	0.530871	0.110371	0.0887258	0.352117	0.186245	0.143823	0.254123
20.002	0.409665	0.322339			1.33929	0.655921	0.801182	0.155362			0.4201	0.396091	0.616419	0.257558	0.358786	0.297325	0.593744	0.29812	0.171836	0.262009	1.58644	0.197016	0.260824	0.265223	0.233711	0.323103	0.649013	0.295388	0.0546916	0.320015	0.11459	0.265124	0.216276	0.0783781	0.248229	0.219596	0.314278	0.698589	0.468273	0.117463	0.32869	0.219132	0.485574	0.108784	0.201209	0.371804	0.225338	0.121329	0.259402
20.139	0.483486	0.388016			1.25274	0.697349	0.736129	0.161431			0.350397	0.343065	0.666669	0.250421	0.32592	0.214766	0.59463	0.285942	0.137436	0.308748	1.69099	0.27323	0.297172	0.311107	0.260361	0.306369	0.586949	0.27978	0.0694062	0.302075	0.113191	0.259478	0.225256	0.0796631	0.33136	0.26302	0.323378	0.643607	0.440589	0.104007	0.310615	0.205867	0.342387	0.121068	0.212188	0.328877	0.228048	0.110963	0.308677
20.276	0.41222	0.232858			1.13363	0.718835	0.669207	0.162498			0.376987	0.350798	0.706581	0.214086	0.361529	0.276627	0.543236	0.277286	0.241849	0.367328	1.49843	0.280965	0.259157	0.390235	0.253074	0.256844	0.573116	0.227882					0.233922	0.0675585	0.331237	0.222163	0.321373	0.596238	0.362498	0.0753882	0.295485	0.186115	0.222842	0.159063	0.185968	0.385632	0.242791	0.120005	0.310113
20.413	0.445757	0.277114			0.902894	0.72476	0.604197	0.135747			0.318695	0.335413	0.797762	0.207491	0.395859	0.195178	0.592858	0.206777	0.255546	0.404582	1.14859	0.260369	0.193697	0.482987	0.249966	0.238084	0.582392	0.182524					0.202177	0.0646122	0.312623	0.189097	0.296417	0.61168	0.316763	0.0708633	0.25895	0.106653	0.158268	0.166073	0.14697	0.27008	0.247697	0.125833	0.275791
20.55	0.396796	0.27999			0.889704	0.748572	0.564574	0.154885			0.294089	0.321894	0.747126	0.20235	0.438402	0.227919	0.467758	0.165114	0.318352	0.403889	0.90282	0.242521	0.205111	0.568782	0.253966	0.218716	0.604323	0.182347					0.200553	0.047538	0.250785	0.173886	0.387493	0.595799	0.336044	0.0687707	0.22775	0.124255	0.158537	0.155987	0.166854	0.343097	0.202436	0.101885	0.249618
20.687	0.460869	0.245674			0.888812	0.778598	0.540434	0.140759			0.273438	0.371844	0.745692	0.276852	0.46884	0.182943	0.410745	0.215653	0.272656	0.396315	0.706301	0.285244	0.210928	0.625279	0.228422	0.148034	0.616502	0.181116					0.215875	0.0443255	0.263008	0.176196	0.395213	0.490352	0.339996	0.0646876	0.245851	0.108701	0.200801	0.166793	0.224459	0.325717	0.187319	0.0720415	0.215697
20.824	0.432215	0.197654			0.891424	0.7815	0.540917	0.114111			0.15809	0.340186	0.766629	0.239458	0.346017	0.164242	0.4779	0.211613	0.392613	0.474119	0.624322	0.276972	0.19926	0.650577	0.226766	0.159301	0.559397	0.155655					0.18501	0.0385146	0.216064	0.1939	0.335108	0.493106	0.367629	0.0845455	0.247904	0.0961133	0.227662	0.163239	0.196302	0.261124	0.184652	0.0872866	0.218863
20.961	0.339668	0.202664			0.840495	0.797025	0.520402	0.102363			0.378316	0.400866	0.681846	0.281213	0.318783	0.126827	0.349134	0.205685	0.465597	0.460978	0.586979	0.237836	0.209926	0.693272	0.327171	0.118825	0.479905	0.139458					0.199685	0.0313299	0.184576	0.225761	0.312864	0.479867	0.406581	0.0841916	0.326527	0.134891	0.263569	0.132292	0.152522	0.286211	0.18881	0.114262	0.282894
21.098	0.233856	0.168011			0.839072	0.784849	0.521544	0.122509			0.331755	0.416735	0.671613	0.325414	0.34356	0.119455	0.425943	0.155118	0.407444	0.347709	0.657026	0.286	0.203273	0.731365	0.332022	0.114946	0.42042	0.150424					0.223445	0	0.252377	0.218924	0.335266	0.449064	0.416066	0.0942182	0.238928	0.171542	0.356767	0.123502			0.201109	0.113645	0.281355
21.235	0.257092	0.169825			0.785596	0.730323	0.591879	0.14517			0.27515	0.406269	0.557637	0.282139	0.568548	0	0.465969	0.156463	0.519872	0.320636	0.605053	0.237344	0.19286	0.768073	0.28561	0.0762012	0.373679	0.161981					0.292175	0.0404882	0.309907	0.212907	0.327148	0.402429	0.37243	0.10728	0.194038	0.166425	0.49916	0.130931			0.200113	0.0941784	0.26053
21.372	0.254735	0.129549			0.739306	0.747494	0.555575	0.131924			0.271232	0.391228	0.475375	0.205265	0.538026	0.113402	0.49403	0.135792	0.420344	0.30079	0.818931	0.336395	0.186206	0.776904	0.265131	0.0474291	0.335806	0.144788					0.252908	0.0693688	0.222567	0.16852	0.381607	0.454068	0.316445	0.087295	0.18541	0.148243	0.603846	0.172085			0.200487	0.0503658	0.25275
21.509	0.222942	0.126123			0.759959	0.799423	0.608672	0.0915999			0.386043	0.304517	0.616879	0.319431	0.518814	0.127269	0.465682	0.205916	0.540622	0.276255	0.979477	0.243042	0.143253	0.829453	0.265105	0.0173599	0.300553	0.114875					0.22909	0.110148	0.168976	0.172386	0.430935	0.441755	0.36393	0.109531	0.226621	0.17843	0.542207	0.20417			0.173934	0.0607611	0.316377
21.646	0.261115	0.0789853			0.796376	0.811583	0.625338	0.138342			0.442753	0.22271	0.457054	0.390532	0.484119	0.137603	0.372842	0.161132	0.621858	0.320809	0.896584	0.216985	0.116192	0.844083	0.273031	0.0658126	0.273807	0.104731					0.266345	0.122938	0.204012	0.150294	0.433355	0.370116	0.341901	0.140922	0.203812	0.228483	0.445806	0.158599			0.211108	0.0624459	0.368845
21.783	0.347023	0.0812346			0.703988	0.782867	0.653577	0.128838			0.488597	0.120398	0.450781	0.402766	0.362952	0.0524083	0.382837	0.157317	0.626849	0.257773	0.745558	0.278401	0.0719007	0.874469	0.24423	0.0495159	0.262668	0.118054					0.229816	0.15999	0.160153	0.18963	0.439427	0.341635	0.32435	0.108637	0.211644	0.29	0.406201	0.159485			0.244921	0.0419083	0.367334
21.92	0.40676	0.103316			0.645045	0.763722	0.701667	0.111303			0.608976	0.0501198	0.416697	0.437366	0.407665	0.0622101	0.444953	0.173168	0.399767	0.218755	0.648155	0.30324	0.0717704	0.941943	0.314144	0.0245225	0.206705	0.127391					0.198735	0.184604	0.162977	0.223624	0.720187	0.414265	0.339919	0.10638	0.198149	0.260274	0.334809	0.198094			0.211428	0.0539028	0.338914
22.057	0.277159	0.0666933			0.655687	0.705731	0.665703	0.152389			0.481693	0.0879769	0.270997	0.471101	0.462038	0.0352752	0.387389	0.164022	0.300551	0.124171	0.600317	0.197646	0.0850297	0.905721	0.451319	0.0509466	0.168886	0.127472					0.193055	0.239227	0.206934	0.192138	0.853366	0.411635	0.367804	0.103531	0.145634	0.274784	0.234908	0.247928			0.191357	0.0602776	0.264927
22.194	0.292595	0.0563161			0.620485	0.679628	0.627387	0.162872			0.580594	0.0800221	0.411999	0.466006			0.302802	0.158812	0.285694	0.148343	0.478156	0.174282	0.0877529	0.888201	0.502832	0.0369342	0.176941	0.162709					0.164115	0.288749	0.296253	0.175996	1.00891	0.372624	0.238665	0.13958	0.1445	0.298819	0.228352	0.184583			0.288263	0.0493244	0.241782
22.331	0.278037	0.0731119			0.58987	0.655626	0.651135	0.124112			0.646396	0.171526	0.405324	0.467368			0.293247	0.136936	0.230094	0.156807	0.443851	0.24976	0.0640741	0.918017	0.489913	0.0227972	0.1619	0.213592					0.16671	0.323774	0.254182	0.23997	1.20155	0.316009	0.227321	0.247752	0.125665	0.301635	0.186065	0.241905			0.340234	0.017737	0.223087
22.468	0.304586	0.0533162			0.7792	0.689472	0.629834	0.122295			0.521399	0.174412	0.272708	0.618751			0.326657	0.0773977	0.136091	0.144294	0.433446	0.262962	0.0655832	0.914172	0.471394	0.0289088	0.155395	0.250545					0.152707	0.377982	0.215512	0.230935	1.12607	0.217856	0.242274	0.236151	0.150442	0.32725	0.236889	0.270071			0.306458	0.0439873	0.221711
22.605	0.240724	0.0410506			0.70308	0.652914	0.591736	0.157499			0.502306	0.179901	0.344606	0.631183			0.366015	0.0588862	0.144015	0.20563	0.437947	0.267057			0.392899	0.0360259	0.179677	0.291536					0.113757	0.437984	0.200168	0.227134	1.1105	0.163954	0.180011	0.320476	0.118767	0.331319	0.240096	0.271235			0.339643	0.0810941	0.19587
22.742	0.239064	0			0.525475	0.62142	0.560401	0.141423			0.569758	0.237819	0.286336	0.584955			0.335532	0.0412125	0.265856	0.203218	0.449863	0.272808			0.381001	0.0220955	0.170142	0.330788					0.094544	0.46466	0.23756	0.183637	1.13456	0.13775	0.161812	0.410379	0.156295	0.336535	0.158444	0.228714			0.37806	0.0507861	0.232817
22.879	0.125807	0.0697459			0.431829	0.547319	0.624249	0.0936506			0.593506	0.319763	0.298034	0.525727			0.341315	0.0435873	0.312348	0.206358	0.485989	0.253802			0.390691	0.00661893	0.149005	0.37541					0.0985189	0.491627	0.26811	0.214778	1.16923	0.106349	0.19054	0.453597	0.151761	0.336785	0.164527	0.244796			0.419103	0.0216422	0.28084
23.016					0.450688	0.585373	0.577571	0.134112			0.52402	0.495811	0.238959	0.608966			0.34138	0.0688934	0.297037	0.233843	0.445974	0.217117			0.388735	0	0.13789	0.440925					0.0913955	0.492131	0.188299	0.198762	1.16063	0.0918632	0.173487	0.556775	0.141265	0.365793	0.185989	0.343091			0.449814	0.0170638	0.261004
23.153					0.484531	0.63106	0.557179	0.167401			0.577182	0.379674	0.284296	0.595267			0.298262	0.0784032	0.301121	0.203778	0.377782	0.235978			0.380796	0.0196229	0.11876	0.502725					0.0937641	0.520493	0.194767	0.173957	1.08155	0.0768043	0.139777	0.660397	0.162464	0.381178	0.180841	0.425135			0.402127	0.01526	0.202137
23.29					0.429945	0.62454	0.511016	0.138971			0.806773	0.456854	0.287791	0.608408			0.34111	0.25253	0.274667	0.179133	0.372732	0.214563			0.446216	0.0636134	0.0970283	0.544972					0.104561	0.564908	0.181607	0.196443	0.884348	0.0992159	0.154458	0.724181	0.191848	0.369234	0.263481	0.443968			0.336939	0.0206008	0.253588
23.427					0.329388	0.643428	0.413036	0.214674			0.878842	0.4916	0.365333	0.549597			0.329654	0.376178	0.218255	0.169827	0.39517	0.27656			0.425677	0.0405246	0.0973409	0.552973					0.0683986	0.614295	0.186019	0.184114	0.663325	0.138774	0.149068	0.800237			0.239495	0.431915			0.318008	0.0281248	0.168251
23.564					0.309855	0.729033	0.392479	0.26714			0.751731	0.470023	0.309345	0.553044			0.218503	0.618067	0.214303	0.155665	0.431337	0.283495			0.393363	0.0374779	0.11246	0.54881					0.06192	0.613756	0.284126	0.250717	0.49391	0.116484	0.134905	0.868329			0.21337	0.465678			0.304315	0.0294117	0.0860076
23.701					0.33088	0.778754	0.41166	0.251946			0.425662	0.495315	0.310621	0.565954			0.0954204	0.651073	0.186076	0.124699	0.437924	0.223433			0.350514	0.0604938	0.114636	0.554011					0.0954005	0.645522	0.202976	0.183787	0.3955	0.138054	0.143561	0.933101							0.261988	0.0266483	0.155469
23.838					0.332934	0.811645	0.420267	0.248787			0.305629	0.526802	0.314775	0.529899			0.198366	0.865349	0.170443	0.144705	0.401238	0.213277			0.314042	0.0722979	0.121219	0.557123					0.106053	0.702815	0.172762	0.225283	0.339562	0.155648	0.153551	0.936912							0.200662	0.0556955	0.123325
23.975					0.375375	0.76297	0.427763	0.271369			0.395623	0.558861	0.247507	0.552929			0.30489	0.730432	0.147492	0.131461	0.335901	0.2348			0.297843	0.103227	0.126167	0.551602					0.0647536	0.690561	0.162641	0.302324	0.337118	0.182463	0.145595	0.927843							0.154575	0.0406735	0.120501
24.112					0.288757	0.782616	0.378616	0.295617			0.53627	0.574771	0.250181	0.660296			0.180541	0.695449	0.200448	0.0763343	0.304518	0.310054			0.27634	0.112245	0.128884	0.534758					0.0460068	0.668468	0.220535	0.318652	0.359129	0.208478	0.139537	1.03342							0.153277	0	0.131754
24.249					0.303687	0.897799	0.348837	0.358413			0.462736	0.523112	0.220612	0.619762			0.103867	0.653804	0.241865	0.0912216	0.322316	0.243174			0.251579	0.0958302	0.139651	0.534519					0.0835339	0.696819	0.188595	0.373809	0.328825	0.192107	0.132611	1.09633							0.166626	0.0118606	0.0986212
24.386					0.313555	0.98086	0.409059	0.417589			0.492367	0.578777	0.259315	0.689284			0.0610191	0.687505	0.237766	0.0616174	0.301939	0.288993			0.250828	0.0874039	0.143282	0.550728					0.079934	0.736981	0.155368	0.379276	0.342437	0.226563	0.115714	1.11206							0.199485	0.00565695	0.167681
24.523					0.272462	0.995073	0.372755	0.493656			0.466265	0.559657	0.301728	0.661401			0	0.655058	0.232094	0.152988	0.365515	0.231913			0.323805	0.119648	0.153237	0.534158					0.0334231	0.655745	0.0705911	0.48873	0.385885	0.224211	0.136615	1.21788							0.198966	0.01314	0.126974
24.66					0.30338	1.03055	0.367839	0.479303			0.404554	0.543573	0.33634	0.701452			0.146914	0.631459	0.282159	0.220027	0.443455	0.269271			0.353248	0.16099	0.158744	0.522743					0.0202357	0.7075	0.0865963	0.529761	0.342396	0.194516	0.160166	1.27934							0.207071	0.0282662
24.797					0.306586	1.07358	0.491383	0.516713			0.324833	0.520572	0.260654	0.68553			0.199311	0.630894	0.242293	0.316711	0.531532	0.348956			0.30526	0.178404	0.152083	0.565512					0.0858853	0.524469	0.120129	0.525771	0.354389	0.236091	0.171997	1.2684							0.286072	0.0412091
24.934					0.227478	1.06627	0.39035	0.479859			0.399931	0.447584	0.240706	0.834772			0.151125	0.620601	0.19647	0.402709	0.4674	0.304557			0.288369	0.170172	0.149378	0.641431							0.0801654	0.548821	0.434348	0.258053	0.138008	1.28919							0.313531	0.0628066
25.071							0.367122	0.514048			0.317453	0.413424	0.409404	0.757555			0.0614531	0.636321	0.20898	0.516952	0.480559	0.316152			0.318144	0.211453	0.16606	0.719846							0.0944854	0.665307	0.509322	0.269292	0.0943466	1.32127							0.229339	0.0185255
25.208							0.389909	0.555129			0.433852	0.529986	0.374787	0.755866			0.0995556	0.663235	0.11917	0.59972	0.564564	0.401242			0.365363	0.289747	0.15459	0.807629							0.0858548	0.633408	0.505213	0.253641	0.0936534	1.29613							0.282138	0.0615756
25.345							0.345567	0.580702			0.392298	0.561028	0.396713	0.707184			0.10636	0.692314	0.1333	0.635544	0.530233	0.465231			0.335489	0.292849	0.172409	0.825054							0.0166349	0.689939	0.529211	0.195414	0.0800216	1.31543							0.303042	0.0538991
25.482							0.316489	0.578855			0.483534	0.517133	0.436504	0.681825			0.0142004	0.62739	0.213802	0.701677	0.489031	0.357123			0.318766	0.329248	0.148692	0.781812							0.0727039	0.702695	0.727288	0.222192	0.132858	1.36604							0.249061	0.0943718
25.619							0.361871	0.540958			0.583894	0.532523	0.628441	0.673892			0.0751374	0.695116	0.210694	0.775136	0.6224	0.409728			0.348429	0.387564	0.11448	0.916408							0	0.72568	0.710672	0.269709	0.130635	1.34293							0.216226	0.0888301
25.756							0.40856	0.532962			0.514161	0.480348	0.588964	0.731274			0.174306	0.751465	0.136713	0.760739	0.713653	0.350722			0.310188	0.440254	0.16918	1.12918							0.0431422	0.808959	0.588965	0.27175	0.111121	1.30529							0.205641	0.0593143
25.893							0.371444	0.545372			0.323436	0.457397	0.477353	0.654495			0.151237	0.709491	0.119735	0.619804					0.281709	0.501808	0.164509	1.14389									0.481139	0.276351	0.127869	1.37137							0.147067	0.0560786
26.03							0.399949	0.540912			0.252145	0.434713	0.508355	0.681082			0.0909919	0.66162	0.13532	0.696745					0.293719	0.557141	0.149883	1.15682									0.447136	0.246716	0.206744	1.38869							0.171327	0.0882759
26.167							0.356753	0.609725			0.553163	0.427908	0.545703	0.577541			0.162416	0.757948	0.0951538	0.566543					0.299285	0.590084											0.490187	0.271906	0.203316	1.26384							0.114902	0.119305
26.304							0.372537	0.604185			0.463193	0.565922	0.556392	0.500752			0.137981	0.732796	0.0918932	0.56186					0.316296	0.62135											0.559076	0.345233	0.176623	1.04443							0.187506	0.1002
26.441							0.40333	0.632962			0.335056	0.513965	0.449431	0.534295			0.0855311	0.703688	0.123096	0.542934					0.368298	0.644263											0.691531	0.315718	0.131639	1.10102							0.155727	0.108289
26.578											0.367086	0.483206	0.338825	0.625722			0.0597756	0.63325	0.190619	0.478342					0.395132	0.682512											0.747183	0.28181	0.156869	0.970812							0.0981435	0.175897
26.715											0.349927	0.521424	0.299614	0.504769			0.174306	0.775918	0.106761	0.525161					0.353504	0.721494											0.879602	0.289385	0.19961	0.890302							0.109048	0.191176
26.852											0.32869	0.534792	0.321346	0.58269			0.0526197	0.70683	0.0921675	0.529866					0.281482	0.732001											0.876733	0.289317	0.259463	0.935562							0.152106	0.155163
26.989											0.405012	0.581564	0.353322	0.632979			0.414141	0.806447	0.0568707	0.565395					0.254359	0.745737											0.788258	0.25605	0.209329	0.895668							0.114552	0.111391
27.126											0.389628	0.51698	0.495182	0.534456					0.159712	0.52207					0.250579	0.742568											0.613121	0.286645	0.174614	0.857229							0.0906061	0.175968
27.263											0.284409	0.43954	0.544553	0.519207					0.136898	0.494474					0.224662	0.76292											0.520578	0.334318	0.159616	0.767994							0.109972	0.20339
27.4											0.32296	0.604043	0.522166	0.511986					0.127823	0.615127					0.208377	0.786155											0.42412	0.282052	0.183951	0.636215							0.0956149	0.187944
27.537											0.278735	0.568587							0.102028	0.503342					0.210514	0.786495											0.483214	0.236949	0.219235	0.523685							0.100093	0.190919
27.674											0.222928	0.448056							0.130377	0.580052																	0.55035	0.264836	0.249395	0.429011							0.157031	0.187966
27.811											0.312403	0.460031							0.0263961	0.63048																	0.494371	0.211613	0.3072	0.36675							0.194428	0.211115
27.948											0.251867	0.487823							0.0293296	0.464023																	0.516487	0.199139	0.311223	0.333878							0.109048	0.114433
28.085											0.393206	0.483905																									0.613062	0.220684	0.283305	0.326822							0.0976366	0.15054
28.222											0.316964	0.563054																									0.61467	0.189862	0.286137	0.324228							0.148021	0.173997
28.359											0.284224	0.748777																									0.611917	0.132356	0.254176	0.311222							0.119066	0.131371
28.496											0.324975	0.845552																									0.692197	0.143324	0.280209	0.320909							0.156892	0.134476
28.633											0.351046	0.93604																									0.673425	0.165491	0.320423	0.294842							0.0917346	0.110874
28.77											0.372927	1.00684																									0.652133	0.175067	0.323481	0.313417							0.101813	0.133044
28.907											0.371165	1.09101																									0.531262	0.17824	0.306403	0.295317							0.0947158	0.131333
29.044											0.311519	1.02923																									0.431508	0.200682	0.364396	0.354656							0.174767	0.103276
29.181											0.388812	0.813546																									0.288843	0.20018	0.314333	0.320728
29.318											0.313979	0.825481																									0.209556	0.185995	0.296672	0.330143
29.455																																					0.221023	0.211394	0.318389	0.333952
29.592																																					0.194237	0.211767
29.729																																					0.170748	0.203529
29.866																																					0.126598	0.202674
30.003
[truncated: 39 more columns]

## Sheet: TRE-NOTUM
TRE
Figure 5D - NOTUM-MYC Pixel intensity profile (Normalized Pixel Intensity measured from basal to apical side of progenitor cells )
	Cell 1		Cell 2		Cell 3		Cell 4		Cell 5		Cell 6		Cell 7		Cell 8		Cell 9		Cell 10		Cell 11		Cell 12		Cell 13		Cell 14		Cell 15		Cell 16		Cell 17		Cell 18		Cell 19		Cell 20		Cell 21		Cell 22		Cell 23		Cell 24		Cell 25
	Normalized Pixel Intensity	Normalized Pixel Intensity	Normalized Pixel Intensity	Normalized Pixel Intensity	Normalized Pixel Intensity	Normalized Pixel Intensity	Normalized Pixel Intensity	Normalized Pixel Intensity	Normalized Pixel Intensity	Normalized Pixel Intensity	Normalized Pixel Intensity	Normalized Pixel Intensity	Normalized Pixel Intensity	Normalized Pixel Intensity	Normalized Pixel Intensity	Normalized Pixel Intensity	Normalized Pixel Intensity	Normalized Pixel Intensity	Normalized Pixel Intensity	Normalized Pixel Intensity	Normalized Pixel Intensity	Normalized Pixel Intensity	Normalized Pixel Intensity	Normalized Pixel Intensity	Normalized Pixel Intensity	Normalized Pixel Intensity	Normalized Pixel Intensity	Normalized Pixel Intensity	Normalized Pixel Intensity	Normalized Pixel Intensity	Normalized Pixel Intensity	Normalized Pixel Intensity	Normalized Pixel Intensity	Normalized Pixel Intensity	Normalized Pixel Intensity	Normalized Pixel Intensity	Normalized Pixel Intensity	Normalized Pixel Intensity	Normalized Pixel Intensity	Normalized Pixel Intensity	Normalized Pixel Intensity	Normalized Pixel Intensity	Normalized Pixel Intensity	Normalized Pixel Intensity	Normalized Pixel Intensity	Normalized Pixel Intensity	Normalized Pixel Intensity	Normalized Pixel Intensity	Normalized Pixel Intensity
(basal to apical distance um)	MYC - Tag	DAPI	MYC - Tag	DAPI	MYC - Tag	DAPI	MYC - Tag	DAPI	MYC - Tag	DAPI	MYC - Tag	DAPI	MYC - Tag	DAPI	MYC - Tag	DAPI	MYC - Tag	DAPI	MYC - Tag	DAPI	MYC - Tag	DAPI	MYC - Tag	DAPI	MYC - Tag	DAPI	MYC - Tag	DAPI	MYC - Tag	DAPI	MYC - Tag	DAPI	MYC - Tag	DAPI	MYC - Tag	DAPI	MYC - Tag	DAPI	MYC - Tag	DAPI	MYC - Tag	DAPI	MYC - Tag	DAPI	MYC - Tag	DAPI	MYC - Tag	DAPI	MYC - Tag
0	0.0953346	0.0953346	0.247007	0.076243	0.398686	0	0.176028	0.63892	0.0767209	0.740199	0	0.67857	0	0.0593055	0.133952	0.146083	0.130708	0.0430202	0.115761	0	0.111635	0	0.214138	0.144158	0.109244	0.218014	0.12365	0.391524	0.231846	0.188982	0.0124783	0.975685	0.183581	0.0679202	0.0268849	0.445126	0.033454	0	0.0984961	0	0	0.0394095	0.034512	0.134327	0.0147279	0.139431	0	0.127069	0.0586329
0.137	0.0954377	0.0954377	0.345795	0.174054	0.360104	0.000713334	0.246275	0.670239	0.274061	0.564671	0.0310862	0.599435	0.073259	0.0600767	0.14467	0.18947	0.197029	0.168288	0.119664	0.0481688	0.104842	0.0197903	0.25426	0.1845	0.246497	0.32843	0.0440492	0.426307	0.343499	0.207794	0.178834	1.02225	0.176511	0.0479821	0.0318881	0.512308	0.0324326	0.00538293	0.1215	0.0535138	0.0264612	0.0962718	0.048368	0.0698374	0.0296472	0.121329	0.0276625	0.141158	0.0527312
0.274	0.0945994	0.0945994	0.398983	0.268317	0.353005	0.0133613	0.243171	0.727251	0.21738	0.578026	0.0289625	0.556549	0.144695	0.0672183	0.114797	0.150449	0.201951	0.193681	0.217838	0.0909504	0.108314	0.0853652	0.231601	0.162582	0.298234	0.296433	0.0589193	0.365113	0.327543	0.261797	0.159729	1.03515	0.176025	0.024975	0.0222774	0.579424	0.0167063	0.0203047	0.108107	0.0841117	0.0445066	0.134062	0.0364399	0.0576142	0.0419213	0.115558	0.0410082	0.138483	0.0608058
0.411	0.0904785	0.0904785	0.381792	0.375119	0.368541	0.017727	0.276707	0.57995	0.0931449	0.572821	0.0568684	0.601708	0.233656	0	0.109751	0	0.119962	0.196951	0.279966	0.105605	0.189986	0.156118	0.282203	0.0851844	0.326494	0.222357	0.087188	0.325334	0.338331	0.211935	0.114443	0.915383	0.168683	0.000729354	0.0253413	0.623657	0	0.017906	0.0871655	0.124177	0.047723	0.149648	0.00859968	0	0.0483569	0.0884543	0.0505035	0.0932149	0.060262
0.548	0.0984236	0.0984236	0.385952	0.423146	0.436851	0.0650711	0.303321	0.598466	0.0629712	0.599963	0.0779448	0.609009	0.180879	0.048065	0.0764227	0.0855075	0.202905	0.178191	0.307588	0.216103	0.241012	0.223575	0.284115	0.0674985	0.313258	0.217971	0.0851694	0.216971	0.221988	0.156085	0.262719	0.90957	0.120372	0	0.0318842	0.606025	0.0166252	0.0614724	0.0833439	0.160161	0.0333684	0.106289	0.0424304	0.0379873	0.041671	0.0610294	0.0744619	0.0651968	0.0467058
0.685	0.166054	0.166054	0.435629	0.440245	0.531468	0.126089	0.257006	0.519917	0.121393	0.521365	0.100905	0.608473	0.185369	0.0499164	0.0670117	0.0715301	0.141095	0.223315	0.387491	0.206503	0.235807	0.262734	0.323376	0.0689256	0.293981	0.194081	0.15769	0.19676	0.226831	0.148184	0.338235	0.865504	0.0892294	0.0192448	0.0437556	0.535816	0.0383559	0.162773	0.088591	0.172304	0.0180919	0.0559315	0.0425411	0.00563594	0.0417667	0.060685	0.046349	0	0.0508747
0.822	0.29589	0.29589	0.402055	0.509727	0.580327	0.161141	0.221801	0.437952	0.150389	0.48888	0.0629971	0.553533	0.245652	0.0775257	0.0444101	0.046181	0.0972877	0.249266	0.455936	0.200157	0.184796	0.243858	0.334937	0.0652465	0.399217	0.188514	0.172151	0.176309	0.327452	0.160556	0.350525	1.02643	0.140801	0.022202	0.0601208	0.48462	0.0527338	0.164447	0.114946	0.206024	0.0231984	0.0578872	0.0337057	0.0260655	0.0283423	0.0250804	0.0389779	0.0502862	0.0700346
0.959	0.300881	0.300881	0.364805	0.520279	0.547171	0.186129	0.184532	0.359297	0.269696	0.366618	0.0849588	0.504435	0.262784	0.163954	0.097105	0.0258463	0.126567	0.22713	0.546801	0.208361	0.176994	0.182357	0.366625	0.0180274	0.357064	0.24992	0.172367	0.105748	0.218468	0.126914	0.184006	0.960307	0.211747	4.3328e-05	0.0798438	0.412349	0.0787944	0.192784	0.115102	0.254117	0.0378375	0.0695726	0.00814667	0.0133097	0.0466683	0.00347334	0.0479987	0.0421094	0.0662833
1.096	0.276195	0.276195	0.394906	0.523003	0.57072	0.240466	0.191592	0.293297	0.402425	0.335417	0.00265595	0.571073	0.328465	0.170373	0.10844	0.0682529	0.198406	0.23448	0.588927	0.177577	0.184083	0.209011	0.367845	0	0.242691	0.207486	0.248349	0.0943118	0.330542	0.153491	0.261939	0.994279	0.283511	0.00489967	0.128963	0.328984	0.0821443	0.184528	0.0664056	0.288532	0.0521751	0.0598504	0.028154	0.0370437	0.0555461	0.0113404	0.0683057	0.047788	0.108204
1.233	0.234838	0.234838	0.408052	0.516049	0.588339	0.318631	0.227217	0.256017	0.271925	0.235038	0.00358606	0.520858	0.322021	0.185454	0.134184	0.110871	0.274912	0.30783	0.468116	0.165295	0.23593	0.170442	0.484222	0.0212983	0.246897	0.244462	0.263408	0.0852585	0.262589	0.129096	0.239819	0.889969	0.346755	0.0437288	0.19835	0.237715	0.0517537	0.194011	0.0428171	0.298119	0.0686365	0.0300465	0.0209439	0.0760587	0.0816637	0.0117515	0.0784059	0.0485524	0.118907
1.37	0.16281	0.16281	0.318651	0.480444	0.554438	0.375728	0.25697	0.239775	0.341552	0.187196	0.0847902	0.619585	0.351775	0.178334	0.154879	0.0955306	0.319168	0.269472	0.313258	0.140796	0.323431	0.1947	0.63544	0.0138274	0.209728	0.309223	0.255973	0.0349653	0.269252	0.112106	0.405645	0.980462	0.343563	0.0740728	0.245009	0.213906	0.0540408	0.196689	0.0565161	0.307723	0.0731969	0.00523905	0.0242106	0.0458549	0.0703026	0	0.0562325	0.0281607	0.147808
1.507	0.128405	0.128405	0.173492	0.424817	0.414306	0.398802	0.329291	0.258852	0.34291	0.134902	0.15418	0.590621	0.38249	0.204824	0.182909	0.125351	0.36378	0.262711	0.306571	0.129868	0.481157	0.251931	0.688808	0.0264419	0.148698	0.296956	0.375467	0.023119	0.290976	0.167715	0.507913	0.801421	0.348634	0.0825506	0.288925	0.260062	0.0941532	0.22882	0.0717836	0.361001	0.0618879	0.0344544	0.0253826	0.051391	0.0779725	0.00897857	0.0598051	0.0290587	0.183542
1.644	0.124077	0.124077	0.109569	0.416281	0.276926	0.432116	0.386677	0.272753	0.51548	0.0571653	0.320511	0.69872	0.42054	0.214369	0.230112	0.146537	0.466472	0.252883	0.16213	0.154938	0.619442	0.24915	0.787482	0.0607976	0.203614	0.409883	0.329362	0.0537773	0.304551	0.176796	0.545016	0.70564	0.361692	0.0863599	0.412246	0.309702	0.132141	0.254368	0.0828308	0.356683	0.0816395	0.0501208	0.057869	0.0468082	0.0886385	0.0266636	0.0889022	0.032389	0.196025
1.781	0.181995	0.181995	0.0877923	0.402813	0.248362	0.538385	0.350616	0.24518	0.714704	0	0.6251	0.74469	0.465391	0.213148	0.262732	0.126508	0.536361	0.309011	0.246936	0.213597	0.452254	0.126528	0.731631	0.062873	0.222332	0.503582	0.309246	0.0860983	0.303286	0.156957	0.511193	0.73995	0.323474	0.0905663	0.467513	0.317213	0.13737	0.216826	0.0802094	0.347788	0.0922357	0.0486859	0.0518243	0.051344	0.0944956	0.0524821	0.0983082	0.0171912	0.204525
1.918	0.176856	0.176856	0.145235	0.378184	0.348999	0.611073	0.432395	0.248497	0.624641	0.0787263	0.910406	0.783125	0.474869	0.176356	0.254818	0.142177	0.544171	0.341975	0.278408	0.236732	0.744181	0.276762	0.522499	0.124038	0.176524	0.422564	0.246473	0.0771866	0.342297	0.164825	0.484112	0.742435	0.292977	0.0940073	0.441678	0.341961	0.13786	0.142356	0.107732	0.304855	0.0470241	0.0502844	0.0460594	0.0599046	0.109925	0.0816205	0.147193	0.0135079	0.224812
2.055	0.0935676	0.0935676	0.163456	0.412551	0.442696	0.60074	0.584253	0.253138	0.585292	0.0744564	1.28045	0.731554	0.525763	0.163024	0.386923	0.181487	0.656204	0.418856	0.320223	0.241862	0.907085	0.229005	0.380152	0.201482	0.136932	0.452047	0.183177	0.0794925	0.405464	0.226079	0.463649	0.768451	0.304245	0.0964048	0.528656	0.338039	0.101015	0.0985674	0.0875988	0.290485	0.0389435	0.0151624	0.0407109	0.05799	0.117553	0.0807493	0.130553	0.0236672	0.245319
2.192	0.150421	0.150421	0.165237	0.462819	0.478527	0.594728	0.493812	0.191039	0.696417	0.0920902	1.65411	0.685191	0.458213	0.16703	0.33257	0.200207	0.635785	0.348457	0.305768	0.248251	1.17356	0.187832	0.286925	0.291808	0.0264807	0.542624	0.210641	0.0878523	0.373634	0.404656	0.450323	0.632157	0.316735	0.130262	0.479541	0.377211	0.0798564	0.0651536	0.0355855	0.307548	0.0685339	0	0.0570823	0.0662394	0.113263	0.0706824	0.13122	0.0517054	0.283302
2.329	0.193126	0.193126	0.177346	0.508803	0.483787	0.647862	0.324276	0.265719	0.471985	0.126342	1.70364	0.766905	0.311721	0.100955	0.513577	0.174581	0.664657	0.339801	0.265146	0.219848	1.37818	0.207972	0.211833	0.324305	0.179806	0.474014	0.235259	0.0442873	0.443555	0.502794	0.378733	0.602818	0.317681	0.198507	0.425833	0.438612	0.0933768	0.0997667	0.027443	0.383276	0.0753073	0.0228047	0.0643924	0.0844157	0.118388	0.0791255	0.140137	0.064052	0.25609
2.466	0.159347	0.159347	0.1783	0.532719	0.467666	0.671021	0.313702	0.187598	0.503862	0.127918	1.62494	0.857164	0.268578	0.0807934	0.646491	0.256134	0.900044	0.407091	0.258845	0.293539	1.42215	0.16157	0.324423	0.397818	0.176971	0.453674	0.206259	0.0579956	0.428538	0.551464	0.304402	0.66702	0.365076	0.26694	0.377564	0.428755	0.0987281	0.13689	0.0535324	0.42502	0.0824838	0.0340689	0.100605	0.0595072	0.133955	0.0931635	0.105199	0.072953	0.198656
2.603	0.151273	0.151273	0.185729	0.522521	0.479112	0.710127	0.293726	0.206359	0.548282	0.189103	1.32935	0.771639	0.164701	0.110569	0.678398	0.228816	0.856083	0.445252	0.278285	0.317889	1.33367	0.152851	0.344104	0.511581	0.146688	0.526451	0.26939	0.0498349	0.437079	0.652178	0.305293	0.632783	0.439872	0.315532	0.354499	0.449697	0.0961547	0.151337	0.053373	0.433158	0.073832	0.0507996	0.153608	0.0522406	0.119547	0.0830966	0.0867774	0.105849	0.187011
2.74	0.145733	0.145733	0.177276	0.530426	0.47969	0.733777	0.3036	0.16946	0.614503	0.309959	1.0544	0.804108	0.16884	0.0896214	0.444717	0.242802	0.662495	0.453117	0.281429	0.274666	1.38635	0.149796	0.351356	0.531328	0.134466	0.429841	0.268723	0.0566206	0.35878	0.778813	0.311901	0.665176	0.444392	0.348837	0.305897	0.468683	0.131161	0.165562	0.0468675	0.473634	0.0639792	0.0513055	0.155403	0.0736998	0.0785308	0.0582739	0.0881287	0.154284	0.197464
2.877	0.216871	0.216871	0.183827	0.508022	0.394011	0.661267	0.309929	0.193046	0.755053	0.287826	0.821798	0.722681	0.138581	0.128597	0.333502	0.342413	0.530755	0.544617	0.215137	0.243236	1.22507	0.137927	0.347936	0.593726	0.22616	0.357857	0.265532	0.0916387	0.342718	0.866833	0.265831	0.82632	0.38332	0.362327	0.229733	0.456562	0.132468	0.198976	0.0534267	0.535426	0.0586407	0.0462263	0.115443	0.0765618	0.0686435	0.051414	0.0835049	0.191613	0.139294
3.014	0.245479	0.245479	0.16981	0.496967	0.304069	0.641805	0.362802	0.177279	0.859606	0.356761	0.751647	0.674659	0.155624	0.12972	0.251393	0.369196	0.323338	0.5355	0.225082	0.274693	1.16891	0.112873	0.311556	0.580498	0.224274	0.380352	0.175351	0.125056	0.281415	0.990622	0.199942	0.937051	0.267865	0.367248	0.184065	0.462156	0.118907	0.160876	0.0401584	0.593394	0.05226	0.0577744	0.0891532	0.0833841	0.0797192	0.0523026	0.0429872	0.194899	0.111347
3.151	0.195628	0.195628	0.222775	0.520679	0.199678	0.70986	0.3502	0.180651	0.628699	0.281962	0.723433	0.690892	0.120199	0.0913918	0.290762	0.409723	0.227177	0.486526	0.19095	0.291734	1.0651	0.141042	0.325041	0.658255	0.142057	0.310601	0.12068	0.222684	0.193415	0.895523	0.36611	0.936853	0.170993	0.36914	0.166046	0.503612	0.116129	0.0833947	0.0225789	0.574446	0.0599924	0.0974998	0.0656056	0.105051	0.0902366	0.0669485	0.0170784	0.218806	0.114764
3.288	0.171413	0.171413	0.236494	0.598654	0.198674	0.666569	0.353679	0.195839	0.537824	0.403312	0.767217	0.608429	0.106359	0.0949536	0.325584	0.447644	0.202303	0.613948	0.152144	0.30628	0.980539	0.0862566	0.276983	0.708478	0.262642	0.285566	0.0790862	0.328348	0.16398	0.811868	0.372665	1.08065	0.145734	0.385995	0.161897	0.524776	0.122011	0.0729634	0	0.599294	0.057504	0.143408	0.0690704	0.125803	0.0838352	0.115115	0.0179004	0.249758	0.132016
3.425	0.141941	0.141941	0.23339	0.630951	0.206777	0.667012	0.381652	0.225737	0.399558	0.437615	0.560355	0.58517	0.109211	0.128063	0.36395	0.488619	0.212705	0.623677	0.134643	0.340522	1.10933	0.0971643	0.245407	0.666163	0.243194	0.306546	0.108716	0.538442	0.0699644	0.653614	0.284112	1.08828	0.14551	0.422188	0.171927	0.521109	0.114046	0.0812469	0.00060661	0.670053	0.0560574	0.185306	0.07141	0.14533	0.0737474	0.14568	0.0184564	0.295596	0.140297
3.562	0.0933934	0.0933934	0.260604	0.614171	0.158002	0.724157	0.356671	0.303629	0.362984	0.478794	0.471927	0.55173	0.159274	0.15356	0.245154	0.420746	0.275428	0.643084	0.126354	0.347669	1.13632	0.132764	0.192175	0.693383	0.161604	0.236606	0	0.63917	0.146855	0.756377	0.321576	1.21257	0.123232	0.446376	0.180797	0.522589	0.111227	0.0928221	0.0125326	0.696557	0.0834134	0.228077	0.0809613	0.159576	0.0745165	0.138525	0.0133328	0.372878	0.0832778
3.699	0.0961342	0.0961342	0.248043	0.643741	0.253957	0.675654	0.319859	0.349675	0.333088	0.532422	0.508327	0.585656	0.150295	0.218696	0.327719	0.419126	0.160227	0.580348	0.109612	0.390379	1.04547	0.158754	0.120474	0.665809	0.1745	0.277207	0.111898	0.594472	0.19148	0.665872	0.275771	1.13802	0.0869844	0.455056	0.181275	0.543743	0.0923967	0.0893077	0.00610943	0.687264	0.0882525	0.262396	0.0885904	0.181139	0.0651216	0.192915	0.0219835	0.397878	0.0371075
3.836	0.0667335	0.0667335	0.293847	0.646943	0.253712	0.727052	0.227881	0.441566	0.390357	0.471503	0.454745	0.607687	0.193652	0.301053	0.284519	0.405271	0.111041	0.53404	0.226242	0.551634	0.71666	0.124672	0.137614	0.680149	0.227509	0.29316	0.13081	0.768106	0.152661	0.603926	0.220738	1.26177	0.0580527	0.485439	0.148749	0.572836	0.101424	0.105763	0.0340611	0.650855	0.0726855	0.268074	0.081631	0.202678	0.0514535	0.225428	0.0219712	0.385032	0.0709172
3.973	0.0846551	0.0846551	0.245359	0.592536	0.247449	0.767136	0.266367	0.434782	0.437657	0.479488	0.510303	0.575258	0.152763	0.377621	0.101268	0.428855	0.112986	0.569487	0.111658	0.657736	0.583496	0.218108	0.147713	0.65048	0.192062	0.293545	0.0596411	0.691462	0.196735	0.605912	0.196557	1.381	0.0378043	0.504056	0.149078	0.562317	0.0888019	0.133822	0.0838967	0.66047	0.0692696	0.284297	0.0948455	0.164486	0.0553772	0.226079	0.020809	0.364935	0.110733
4.11	0.211209	0.211209	0.240837	0.559608	0.22565	0.780319	0.239403	0.449945	0.431745	0.533915	0.605965	0.544626	0.148404	0.390251	0.0788187	0.483245	0.0730013	0.446421	0.101929	0.635005	0.527688	0.311614	0.103487	0.687316	0.180781	0.363541	0.00476357	0.546972	0.152843	0.580783	0.163697	1.4449	0.0297059	0.493979	0.134883	0.586064	0.104447	0.142245	0.069904	0.72074	0.096643	0.276827	0.08687	0.127921	0.0453981	0.202368	0.0296121	0.380563	0.0753983
4.247	0.0968372	0.0968372	0.176392	0.650036	0.159925	0.81497	0.39185	0.591243	0.388999	0.485942	0.556308	0.657234	0.132918	0.435651	0.0691251	0.510071	0.0906859	0.434962	0.05044	0.60194	0.498942	0.35781	0.106596	0.664886	0.165947	0.411288	0.108578	0.520319	0.227919	0.65256	0.261202	1.565	0.0501821	0.527605	0.166419	0.574921	0.13063	0.146568	0.054841	0.78455	0.10034	0.27335	0.079927	0.109912	0.0414531	0.180283	0.0511144	0.349498	0.0743537
4.384	0.0972821	0.0972821	0.149687	0.706776	0.257551	0.790432	0.362873	0.472067	0.460826	0.440591	0.493543	0.618001	0.0843147	0.491446	0.100973	0.604839	0.110431	0.365262	0.0898155	0.832041	0.499343	0.273228	0.127658	0.755029	0.184948	0.508815	0.0991429	0.433731	0.271628	0.710179	0.187666	1.65751	0.0556227	0.522626	0.250298	0.562877	0.132795	0.174711	0.0524717	0.817242	0.107572	0.253295	0.0776245	0.112486	0.0362487	0.193751	0.0591697	0.322328	0.0922524
4.521	0.144966	0.144966	0.0690178	0.745211	0.254458	0.766248	0.233039	0.485781	0.370095	0.313272	0.412473	0.646216	0.0677015	0.535175	0.043558	0.703026	0.0380174	0.305754	0.141682	0.73497	0.362295	0.300913	0.110064	0.682236	0.115645	0.540569	0.0836567	0.394171	0.263916	0.676234	0.227495	1.68781	0.0504832	0.542066	0.289849	0.556771	0.164043	0.190441	0.0562553	0.755601	0.0971387	0.237412	0.0740687	0.105174	0.0267096	0.199566	0.0617446	0.27256	0.0896586
4.658	0.152485	0.152485	0.0273031	0.773125	0.229238	0.687723	0.222972	0.472573	0.423386	0.344908	0.338436	0.751336	0.134015	0.462429	0.124806	0.634233	0.0629621	0.330916	0.142326	0.739595	0.272694	0.30161	0.119127	0.661812	0.144604	0.701916	0.0480219	0.41031	0.154376	0.730906	0.341789	1.62566	0.0478898	0.513751	0.235053	0.539638	0.126668	0.204275	0.046572	0.708433	0.0982076	0.205553	0.0676488	0.0655405	0.0188526	0.194814	0.0367257	0.277948	0.0692699
4.795	0.139839	0.139839	0.0830033	0.786114	0.193498	0.671244	0.133009	0.469666	0.349222	0.380136	0.323665	0.623443	0.0816689	0.445842	0.136706	0.719272	0	0.14521	0.0582823	0.744469	0.222133	0.345446	0.149262	0.637602	0.112616	0.769121	0.155069	0.423413	0.159822	0.693585	0.33339	1.5523	0.0726368	0.50267	0.186635	0.540355	0.101587	0.238275	0.018109	0.707994	0.095301	0.158005	0.0918903	0.109066	0.0347113	0.184854	0.0346708	0.261985	0.0420138
4.932	0.126006	0.126006	0.110453	0.800183	0.20661	0.773017	0.178979	0.491734	0.222396	0.414322	0.381977	0.669528	0.137775	0.645645	0.188587	0.79374	0.0695078	0.264588	0.0828997	0.644998	0.195503	0.31959	0.0793117	0.676603	0.0947274	0.639381	0.0852384	0.427612	0.232119	0.781905	0.431724	1.39905	0.074684	0.540051	0.164413	0.588728	0.107306	0.207622	0.0332665	0.688648	0.0768682	0.12485	0.0717763	0.0997594	0.0723338	0.189253	0.0334194	0.240023	0.0534054
5.069	0.140625	0.140625	0.161885	0.782537	0.136544	0.828023	0.116076	0.483335	0.152021	0.415601	0.361552	0.644812	0.102219	0.635257	0.177168	0.709401	0.0784361	0.244476	0.101274	0.510253	0.175318	0.30212	0.107108	0.742915	0.134749	0.53123	0.120974	0.486781	0.163252	0.799996	0.431974	1.3022	0.0703272	0.583574	0.156867	0.660818	0.106857	0.20051	0.0465053	0.713113	0.0436566	0.0955685	0.0619257	0.0864692	0.087024	0.180446	0.0505392	0.213848	0.0642657
5.206	0.105027	0.105027	0.121494	0.779454	0.172869	0.963687	0.0855823	0.486389	0.183708	0.357217	0.389163	0.677201	0.0495398	0.620589	0.235191	0.702135	0.111456	0.328317	0.106636	0.540735	0.225181	0.372157	0.16647	0.672319	0.0718725	0.485431	0.171502	0.50698	0.16273	0.782658	0.288919	1.21263	0.0459028	0.591777	0.123623	0.735517	0.0444829	0.204945	0.0427695	0.759483	0.0411451	0.0821643	0.0544859	0.118316	0.0440512	0.162358	0.0649732	0.226809	0.0632461
5.343	0.0853194	0.0853194	0.100188	0.7443	0.115748	1.02096	0.136777	0.611725	0.189279	0.428363	0.373936	0.574217	0.105308	0.578073	0.107149	0.708098	0.112534	0.254178	0.102159	0.612031	0.213222	0.35507	0.162114	0.743685	0.152363	0.426419	0.211441	0.426312	0.181713	0.825663	0.303444	1.11213	0.0686714	0.625158	0.103442	0.814749	0.0408474	0.225723	0.0503564	0.705578	0.0362886	0.0696666	0.0573276	0.124196	0.0315476	0.171076	0.0761226	0.261599	0.0491227
5.48	0.0759104	0.0759104	0.118015	0.712418	0.00968422	1.08211	0.158492	0.657121	0.165926	0.485594	0.280695	0.591217	0.124731	0.477034	0.134057	0.75333	0.0981255	0.254648	0.0583561	0.636009	0.241243	0.361915	0.118554	0.831941	0.0404041	0.405185	0.196111	0.428716	0.164785	0.842613	0.328747	1.05393	0.0442556	0.618836	0.136787	0.881084	0.0599228	0.232724	0.0433128	0.605736	0.0457306	0.066718	0.0552611	0.134943	0.050217	0.217332	0.0495205	0.281214	0.011302
5.617	0.0676042	0.0676042	0.0825072	0.748017	0.0780011	1.14469	0.132339	0.598998	0.1562	0.449578	0.233083	0.574619	0.186732	0.592551	0.114775	0.760062	0.138095	0.252074	0	0.495274	0.353764	0.3438	0.10092	0.794476	0.0850613	0.425561	0.190653	0.42289	0.0996823	0.868936	0.321042	1.25511	0.0515326	0.673732	0.124422	0.91149	0.0981562	0.241203	0.0494248	0.603406	0.0610342	0.0873545	0.0548931	0.145299	0.0466982	0.218751	0.0457627	0.2901	0.00922707
5.754	0.0838232	0.0838232	0.130983	0.678474	0.106977	1.04381	0.158111	0.669197	0.140579	0.426989	0.212618	0.542723	0.201725	0.691394	0.0796286	0.6693	0.178854	0.292751	0.241008	0.542106	0.401347	0.31805	0.0893581	0.789147	0.0547786	0.496968	0.183126	0.407672	0.113842	0.736303	0.173864	1.2436	0.033168	0.611863	0.078829	0.932406	0.117191	0.274114	0.0750836	0.675477	0.0866124	0.0978947	0.0518376	0.124793	0	0.172636	0.0515181	0.306169	0.023861
5.891	0.113088	0.113088	0.151099	0.645391	0.0669793	1.03183	0.179218	0.635718	0.131518	0.468434	0.361557	0.615275	0.198235	0.563195	0.13226	0.634013	0.1371	0.320218	0.214104	0.557245	0.341108	0.286515	0.0611722	0.923768	0.081139	0.553685	0.188138	0.361804	0.177498	0.797191	0.239333	1.32618	0	0.588394	0.0700215	0.933687	0.139902	0.265608	0.0491943	0.706795	0.0857022	0.119154	0.0854271	0.13111	0.0313826	0.229648	0.0462308	0.316844	0.0151064
6.028	0.105111	0.105111	0.115343	0.689304	0.0615456	0.944581	0.277128	0.711531	0.185609	0.567177	0.388248	0.50503	0.130799	0.560303	0.164492	0.595575	0.0951744	0.304419	0.178897	0.494049	0.314443	0.302887	0.125289	0.886654	0.0384022	0.463606	0.106605	0.288303	0.110518	0.760039	0.200978	1.3549	0.0424492	0.537726	0.0626087	0.94961	0.182465	0.225807	0.0589226	0.781775	0.0639174	0.134211	0.0652371	0.160539	0.0530048	0.251111	0.0529537	0.387282	0.0235198
6.165	0.10099	0.10099	0.0953988	0.757785	0.108314	0.824858	0.134185	0.721235	0.238833	0.566882	0.449593	0.505776	0.104671	0.635863	0.165631	0.573241	0.0853483	0.298454	0.206106	0.485124	0.218677	0.283487	0.161254	0.850006	0.0277781	0.55115	0.107341	0.295612	0.114795	0.770884	0.181815	1.46741	0.0545561	0.580635	0.0337061	0.836064	0.230951	0.22352	0.0737811	0.814888	0.0607805	0.146159	0.0751272	0.152192	0.0424037	0.238123	0.072586	0.460078	0.0440779
6.302	0.0709963	0.0709963	0.0694694	0.823748	0.190572	0.800985	0.0707895	0.718331	0.220921	0.531037	0.395726	0.549847	0.080154	0.839567	0.118479	0.48635	0.0898031	0.345536	0.156293	0.561484	0.140774	0.327695	0.258802	0.846153	0.0703904	0.661948	0.0858086	0.354073	0.219292	0.812543	0.206786	1.53906	0.0297489	0.656025	0.0389718	0.682966	0.309663	0.210411	0.078043	0.829005	0.057899	0.149183	0.0309764	0.157009	0.0395246	0.269904	0.0568185	0.457329	0.0305847
6.439	0.104873	0.104873	0.0217	0.796434	0.223059	0.885611	0.0565951	0.76554	0.216207	0.578929	0.395318	0.679923	0.0729045	0.867525	0.0651768	0.494662	0.0897134	0.338443	0.164217	0.592539	0.159606	0.398939	0.153112	0.866936	0.0341792	0.778102	0.108187	0.370876	0.109536	0.792663	0.156723	1.39604	0.0128595	0.652404	0.046408	0.632435	0.262035	0.206004	0.109406	0.845853	0.0518379	0.143848	0.0540286	0.167561	0.0348811	0.290599	0.0271305	0.422454	0.0595214
6.576	0.132977	0.132977	0	0.765236	0.151237	0.891801	0.0314924	0.68989	0.206961	0.589302	0.231118	0.642514	0.068191	0.897441	0.0492021	0.530391	0.104091	0.42087	0.193491	0.517644	0.175696	0.433024	0.165418	0.856162	0.0171755	0.857435	0.148351	0.329584	0.101493	0.774962	0.147212	1.32924	0.0184291	0.650039	0.0654414	0.637068	0.150767	0.174487	0.051483	0.883725	0.0408972	0.14627	0.025848	0.172858	0.0329742	0.29748	0.02826	0.519056	0.0116856
6.713	0.104853	0.104853	0.102795	0.77852	0.128023	0.921597	0.104949	0.721741	0.173566	0.613336	0.251744	0.584951	0.0753097	1.05719	0.209881	0.534663	0.130689	0.422322	0.145388	0.512637	0.138971	0.459619	0.00504748	0.754024	0.0292173	0.862323	0.137431	0.352604	0	0.708325	0.222944	1.17008	0.0206956	0.717761	0.092201	0.640629	0.117599	0.223966	0.0501224	0.789138	0.0309982	0.154341	0.0234911	0.172817	0.0414804	0.29851	0.0202497	0.577594	0.0212024
6.85	0.0936062	0.0936062	0.119573	0.742887	0.128023	0.925962	0.0450124	0.750958	0.112874	0.610967	0.173324	0.691516	0.0869773	1.03855	0	0.67558	0.123702	0.446429	0.149889	0.5663	0.183648	0.527579	0.170073	0.719622	0.0691617	0.881477	0.167134	0.383291	0.102298	0.813051	0.15105	1.30828	0.0819008	0.803604	0.106298	0.662513	0.107796	0.230381	0.0564251	0.771828	0.0313469	0.137272	0.0185313	0.168313	0.0413834	0.30218	0.0186051	0.576557	0.0260912
6.987	0.113063	0.113063	0.0591536	0.832702	0.096958	0.875144	0.107003	0.879817	0.132821	0.613187	0.15663	0.734623	0.0422185	0.935814	0.0973834	0.52696	0.0647537	0.578779	0.141506	0.619784	0.145686	0.491469	0.0741408	0.834687	0.0709403	0.862748	0.11805	0.461147	0.172253	0.828826	0.133789	1.31025	0.0596139	0.784912	0.126322	0.724889	0.0955421	0.211527	0.0724985	0.791931	0.0204853	0.111288	0.00607413	0.184283	0.0261206	0.301439	0.0290209	0.539337	0.0270958
7.124	0.156896	0.156896	0.0785895	0.948387	0.0430903	0.75992	0.100076	0.864095	0.241894	0.647805	0.134808	0.644616	0.106658	0.993004	0.0781564	0.681123	0.125823	0.550378	0.13072	0.623074	0.163528	0.430461	0	0.732503	0.118789	0.83588	0.107783	0.49927	0.142013	0.840797	0.123926	1.33815	0.068951	0.728047	0.125876	0.784491	0.124952	0.222907	0.072645	0.799428	0.0128579	0.0816397	0.024506	0.244383	0.0191202	0.29251	0.0532274	0.495501	0.0495802
7.261	0.13635	0.13635	0.120616	1.03436	0.0522794	0.681131	0.0497945	0.855409	0.255425	0.686675	0.190973	0.695136	0.0869436	0.912946	0.0258623	0.640299	0.206833	0.624434	0.141846	0.660644	0.132467	0.389462	0.0509238	0.880048	0.127884	0.765633	0.149478	0.422422	0.144183	0.861105	0.0871076	1.21946	0.103448	0.747715	0.0737083	0.812365	0.156445	0.207064	0.0573203	0.83802	0.0099106	0.0397216	0.00658218	0.248649	0.0169236	0.310617	0.0634421	0.464002	0.0292081
7.398	0.0951411	0.0951411	0.146539	1.13179	0.0554496	0.717923	0.117754	0.867899	0.164837	0.745458	0.192185	0.817715	0.0720015	0.772133	0.121495	0.59901	0.146822	0.70406	0.0746147	0.684072	0.104268	0.340127	0.0605586	0.842205	0.042028	0.766247	0.193026	0.480828	0.17173	0.893093	0.10392	1.231	0.129219	0.754524	0.0803139	0.79263	0.130589	0.210077	0.0239013	0.786596	0.0280472	0.0633444	0.03043	0.298272	0.0179808	0.325718	0.039401	0.419786	0.00297246
7.535	0.066108	0.066108	0.148269	1.21345	0.0542021	0.661401	0.0767026	0.92357	0.147404	0.633708	0.161006	0.873806	0.065233	0.761102	0.117517	0.67934	0.152799	0.766971	0.111662	0.716687	0.119734	0.331499	0.0834388	0.835718	0	0.82844	0.104748	0.432423	0.0915727	0.886322	0.120593	1.33689	0.10128	0.875261	0.113769	0.865592	0.0922742	0.193565	0.0298313	0.739195	0.0342166	0.0735235	0.0231058	0.409804	0.0241362	0.306047	0.0333239	0.396655	0.0174561
7.672	0.0459357	0.0459357	0.15599	1.23915	0.0888556	0.573661	0.0564937	0.908688	0.172767	0.69607	0.163409	0.92059	0.113722	0.648007	0.130248	0.680846	0.203878	0.795185	0.108993	0.71105	0.103814	0.363215	0.0457604	0.935042	0.0182109	0.759729	0.0947334	0.441392	0.0894698	0.933986	0.0720623	1.32512	0.0804686	0.892961	0.113021	0.955545	0.0687464	0.246112	0.0597233	0.731599	0.0224316	0.0484039	0.0277096	0.355775	0.0347871	0.282258	0.0640521	0.354171	0.0424272
7.809	0.0544935	0.0544935	0.160652	1.22727	0.176959	0.566936	0.0844311	0.877253	0.146336	0.711725	0.130123	0.983149	0.0266266	0.720053	0.112548	0.615193	0.236165	0.863757	0.0791733	0.598591	0.110175	0.38075	0.0691494	0.958949	0.0280573	0.683102	0.0592549	0.346584	0.125693	0.955923	0.114578	1.30414	0.0637427	0.850915	0.101255	0.948259	0.0385596	0.252806	0.0542171	0.710437	0.0155824	0.0772694	0.0177927	0.330103	0.0495388	0.280258	0.0547983	0.303965	0.0442597
7.946	0.121614	0.121614	0.194524	1.13443	0.154079	0.594595	0.0600537	0.89115	0.133679	0.688889	0.115547	0.878126	0.0665833	0.748383	0.109157	0.605784	0.122034	0.893991	0.199882	0.702001	0.0751721	0.331594	0.0958236	1.00104	0.0695011	0.664222	0.0724099	0.457692	0.122574	1.02516	0.156049	1.38407	0.037142	0.86791	0.0949122	0.967338	0.0426039	0.266863	0.0327509	0.700322	0.0189615	0.076835	0.0330365	0.333368	0.0526687	0.301535	0.0603939	0.281046	0.0468087
8.083	0.0888856	0.0888856	0.157968	1.0979	0.123934	0.634456	0.147289	0.853789	0.0577194	0.605159	0.160906	0.878634	0.0374376	0.684834	0.1301	0.610127	0.137422	0.981751	0.0692894	0.649651	0.0623461	0.358516	0.102132	1.05192	0.073084	0.748891	0.151206	0.464713	0.14219	1.11333	0.107903	1.42451	0.0353572	0.87603	0.0605714	1.04334	0.0938262	0.27417	0.0447799	0.720668	0.0273112	0.103444	0.00499982	0.351227	0.0645928	0.348413	0.0662123	0.263308	0.042096
8.22	0.04956	0.04956	0.0798806	0.992312	0.147147	0.620336	0.107668	0.821768	0	0.393938	0.149326	0.89512	0.0440668	0.59503	0.0833618	0.615416	0.132818	1.00689	0.086454	0.747523	0	0.258471	0.0316918	0.971323	0.1129	0.6456	0.208323	0.374641	0.115494	1.19973	0.0805433	1.46308	0.0378301	0.820141	0.0452797	1.09972	0.125933	0.308923	0.0994346	0.675645	0.0168548	0.108273	0	0.339252	0.0834515	0.396614	0.0657627	0.197948	0.00592249
8.357	0.0522106	0.0522106	0.0627152	0.942717	0.0793386	0.612188	0.0873065	0.799202	0.107765	0.597609	0.171346	0.986602	0.0460965	0.62558	0.102736	0.732593	0.191605	1.12459	0.0592457	0.675408	0.0757269	0.292275	0.0222142	0.925887	0.247859	0.682387	0.233484	0.42402	0.142477	1.12284	0	1.40488	0.0400279	0.763843	0.0253648	1.0626	0.112984	0.284434	0.059264	0.688977	0.0131618	0.0917661	0.0261624	0.375531	0.0675473	0.428135	0.0579191	0.213025	0.0137497
8.494	0.0522492	0.0522492	0.0794608	0.857627	0.0567871	0.657481	0.294888	0.723185	0.101782	0.649303	0.199942	0.962257	0.0290614	0.606327	0.115442	0.863124	0.118387	1.11208	0.0420976	0.748538	0.0704716	0.24021	0.0748255	0.990042	0.0956338	0.690296	0.207132	0.495103	0.0759808	1.13763	0.0688259	1.56652	0.0383161	0.784121	0.00383567	1.07689	0.119152	0.299663	0.0411654	0.706767	0.00919429	0.110791	0.0326207	0.347181	0.0691948	0.44962	0.0617154	0.244834	0.0413279
8.631	0.0465161	0.0465161	0.118994	0.797453	0.0865214	0.662828	0.11781	0.82232	0.142194	0.717887	0.145574	0.927673	0.0330321	0.538563	0.142131	0.837643	0.0774187	1.09256	0.0526127	0.851222	0.0864877	0.19808	0.0227567	0.92993	0.142156	0.613723	0.123066	0.545067	0.189349	1.10348	0.103323	1.47039	0.0459544	0.752286	0	1.10936	0.131488	0.313887	0.05019	0.773973	0.0102632	0.172883	0.0373142	0.325584	0.0731579	0.477497	0.0623816	0.246837	0.0383372
8.768	0.0264084	0.0264084	0.174357	0.796944	0.038499	0.656058	0.0454789	0.816059	0.177662	0.671854	0.144826	0.867347	0.0649081	0.577356	0.0883647	0.768916	0.186597	0.924804	0.0277863	0.815359	0.0950294	0.197781	0.042782	0.896487	0.0892371	0.624481	0.140116	0.532055	0.156776	1.07022	0.0955693	1.2882	0.0727142	0.728538	0.0193664	1.09654	0.127566	0.29944	0.0383325	0.812373	0.00991459	0.208654	0.00830747	0.297908	0.0723619	0.457328	0.0655753	0.269747	0.0377527
8.905	0.0475286	0.0475286	0.221128	0.816319	0.0264741	0.674807	0.117536	0.805406	0.156751	0.642182	0.137949	0.762554	0.035872	0.651547	0.146936	0.907656	0.0882733	0.843323	0.00185706	0.798046	0.141356	0.159256	0.0816128	0.722135	0.143732	0.640597	0.0877122	0.452452	0.0972585	1.09057	0.0973946	1.62791	0.0946183	0.704199	0.0227711	1.05594	0.147132	0.370033	0.0412469	0.771605	0.0198483	0.235994	0.00235525	0.30582	0.0509688	0.432951	0.0470267	0.210927	0.0366642
9.042	0.0684167	0.0684167	0.214749	0.829286	0.0936977	0.715292	0.0453369	0.703469	0.178641	0.733146	0.090492	0.770102	0.0627729	0.640637	0.0903346	1.00691	0.12089	0.685051	0.021592	0.847751	0.140354	0.158851	0.115984	0.580281	0.140016	0.629674	0.0770217	0.523661	0.0598333	1.19945	0.0651272	1.41523	0.0908938	0.667594	0.0284991	0.959637	0.180831	0.401243	0.0361279	0.734727	0.01608	0.271804	0.00441223	0.274732	0.0477146	0.431594	0.0609466	0.24757	0.043622
9.179	0	0	0.131784	0.88527	0.19099	0.747629	0.125493	0.734164	0.199829	0.757585	0.108604	0.790557	0.0936192	0.716095	0.103694	0.945626	0.0810319	0.542382	0.0276428	0.854584	0.0760235	0.125803	0.0677388	0.569426	0.100256	0.650157	0.166403	0.53138	0.0656964	1.13479	0.0684117	1.36631	0.0669511	0.642276	0.0334161	0.855208	0.16057	0.372375	0.0449446	0.720685	0.00540837	0.30395	0.00338143	0.272923	0.0813935	0.489268	0.0717853	0.271797	0.0454238
9.316	0.0317352	0.0317352	0.0933445	0.956755	0.124519	0.699081	0.1146	0.750764	0.25564	0.780529	0.125952	0.724347	0.0601313	0.616391	0.13345	0.935963	0.0709553	0.506088	0.0645996	0.790836	0.0474742	0.197087	0.0907874	0.616142	0.0470415	0.653625	0.0910411	0.531361	0.190134	1.20572	0.0758092	1.3812	0.090038	0.637557	0.0361783	0.839606	0.121194	0.347748	0.0548965	0.782532	0.0236088	0.310813	0.0289324	0.343596	0.0930352	0.479173	0.093655	0.319991	0.0197137
9.453	0.0584983	0.0584983	0.123586	0.981272	0.0699823	0.69917	0.118829	0.753674	0.171005	0.862148	0.109719	0.793648	0.0471303	0.558427	0.123423	0.868367	0.096289	0.429217	0.144511	0.784252	0.110922	0.244094	0.109421	0.681964	0.168108	0.574001	0.110284	0.530289	0.00978142	1.21033	0.0887306	1.63684	0.112015	0.679599	0.0502006	0.829038	0.0466068	0.393879	0.051327	0.821333	0.0334034	0.343726	0.0406651	0.378344	0.0571464	0.417799	0.0834468	0.345811	0
9.59	0.108265	0.108265	0.199492	1.01181	0.0356567	0.774753	0.15128	0.718204	0.139751	0.844163	0.127478	0.872091	0.106979	0.597379	0.159089	0.8198	0.179599	0.422498	0.242915	0.859966	0.128414	0.252534	0.0557805	0.653105	0.156607	0.580479	0.137219	0.548885	0.0715835	1.07522	0.150304	1.71967	0.0985751	0.718284	0.0466235	0.790384	0.0430939	0.455407	0.0484725	0.888066	0.0317573	0.330166	0.0374698	0.298433	0.0257356	0.350755	0.0685542	0.334187	0.0170543
9.727	0.150279	0.150279	0.247394	0.992528	0.0749916	0.820629	0.207946	0.732072	0.222922	1.03988	0.151792	0.825955	0.120419	0.657864	0.166441	0.708369	0.143324	0.357051	0.28229	0.720012	0.144029	0.300578	0.0427034	0.730399	0.122445	0.57831	0.0721294	0.588937	0.0355043	1.15411	0.152615	1.68667	0.0834534	0.707037	0.0163574	0.776275	0.0948063	0.403864	0.0598889	0.869046	0.0233224	0.324864	0.021524	0.276615	0.0150609	0.342946	0.101511	0.324366	0.0283156
9.864	0.174328	0.174328	0.242256	0.982504	0	0.724648	0.250621	0.811032	0.199299	1.07014	0.136924	0.759526	0.189091	0.713311	0.10215	0.688612	0.122887	0.343699	0.279826	0.776282	0.0234713	0.293868	0.132866	0.889482	0.104376	0.650093	0.138456	0.617474	0.0418848	1.17755	0.0873002	1.75086	0.0758882	0.670468	0.0261444	0.799102	0.139004	0.359239	0.0407928	0.848977	0.0277605	0.30832	0.0265728	0.28597	0.042949	0.382339	0.121396	0.321279	0.0468452
10.001	0.169549	0.169549	0.252228	1.03096	0.0977939	0.754622	0.224945	0.789247	0.220345	1.19334	0.157594	0.868523	0.105439	0.656592	0.111253	0.740373	0.106833	0.337486	0.260198	0.739778	0.133534	0.325567	0.176056	0.950259	0.13868	0.653582	0.187159	0.618139	0.0651168	1.04207	0.22277	1.80075	0.0848597	0.626115	0.0435284	0.799919	0.11862	0.370311	0.0198032	0.796132	0.0654221	0.311566	0.0272333	0.298448	0.0556405	0.348294	0.0797293	0.349233	0.0530882
10.138	0.235928	0.235928	0.221351	1.07903	0.112327	0.82731	0.120696	0.725125	0.163155	1.16981	0.155315	0.924735	0.0161701	0.639167	0.151939	0.69422	0.112908	0.331318	0.24018	0.695931	0.151931	0.374106	0.0907724	0.86634	0.0934643	0.554912	0.131908	0.620828	0.0889093	1.01226	0.208944	1.61401	0.111878	0.622363	0.06121	0.7695	0.0668675	0.351541	0.0629254	0.725476	0.0397972	0.306883	0.00736659	0.332894	0.0659051	0.333223	0.0558945	0.288738	0.0379702
10.275	0.154413	0.154413	0.166821	1.13354	0.160092	0.769454	0.0955118	0.81632	0.189162	1.16031	0.174979	0.906943	0.00766727	0.749049	0.188958	0.704078	0.126407	0.313528	0.152415	0.650879	0.18253	0.436022	0.0618532	0.836343	0.101507	0.649019	0.18079	0.622232	0.1762	0.916223	0.111602	1.54441	0.12361	0.655657	0.0893252	0.735073	0.0429714	0.303456	0.0909507	0.715779	0.0421365	0.265661	0.000279817	0.321417	0.067876	0.321752	0.0469159	0.26929	0.0466061
10.412	0.100468	0.100468	0.139702	1.09963	0.154665	0.819916	0.12418	0.813307	0.139431	1.11009	0.196567	0.902848	0.0846818	0.731972	0.180433	0.718995	0.149541	0.265207	0.0880118	0.60502	0.139418	0.401818	0.152229	0.862281	0.179372	0.580903	0.170748	0.633039	0.0390394	0.794427	0.0731603	1.40142	0.112196	0.687763	0.110192	0.693366	0.0561648	0.282705	0.0928399	0.748779	0.0375821	0.226989	0.0134883	0.269151	0.0401326	0.300067	0.0360055	0.250988	0.0485092
10.549	0.101919	0.101919	0.142812	1.146	0.109317	0.912244	0.142233	0.854336	0.142354	0.960341	0.255324	0.924576	0.120305	0.738804	0.126722	0.784288	0.175301	0.309564	0.031152	0.537312	0.194412	0.448083	0.212971	0.858909	0.315453	0.707916	0.121572	0.682298	0.0572898	0.890695	0.180996	1.4843	0.106742	0.763259	0.124834	0.65744	0.0599641	0.283291	0.0924837	0.721868	0.0149105	0.168129	0.0312424	0.262976	0.0558475	0.298105	0.0374921	0.27595	0.032658
10.686	0.0693712	0.0693712	0.165549	1.16531	0.127104	0.89973	0.192439	0.948025	0.130471	0.854354	0.269895	0.980476	0.0617517	0.684939	0.141684	0.700961	0.18457	0.277857	0.0415523	0.705342	0.200014	0.469253	0.211414	0.828207	0.174887	0.561665	0.118763	0.757304	0.138066	0.945777	0.142675	1.56847	0.111366	0.800419	0.143867	0.747391	0.0466888	0.246168	0.0749804	0.666291	0.0142985	0.138778	0.0235801	0.270355	0.0608111	0.329223	0.0418719	0.297392	0.00553558
10.823	0.0512368	0.0512368	0.216612	1.11064	0.0819236	0.982659	0.162691	0.867461	0.146428	0.959659	0.197181	0.956172	0.0549706	0.724917	0.104348	0.788265	0.282714	0.267014	0.0748114	0.76446	0.203875	0.449874	0.211519	0.778536	0.255188	0.672919	0.156319	0.828715	0.165063	0.920036	0.167959	1.48625	0.105142	0.78654	0.176178	0.84289	0.0545309	0.23582	0.0560161	0.657979	0.0321233	0.135237	0.0113869	0.258272	0.0496579	0.349125	0.0305051	0.293979	0.0379951
10.96	0.0931097	0.0931097	0.21735	1.05863	0.0638863	0.915674	0.212729	0.838659	0.15459	0.856916	0.227771	0.932392	0.0841923	0.683016	0.1018	0.843764	0.370093	0.179827	0.081801	0.727584	0.194405	0.447341	0.264243	0.79823	0.215549	0.623874	0.100458	0.639698	0.0903368	0.883676	0.0760355	1.47765	0.0979902	0.84252	0.188285	0.834404	0.0573087	0.249682	0.0529397	0.643646	0.0308589	0.138504	0.0193615	0.226671	0.0596604	0.312247	0.0184141	0.319055	0.0735334
11.097	0.163738	0.163738	0.19207	1.07156	0.0385826	0.938254	0.285212	0.847038	0.0841298	0.76246	0.209211	0.865797	0.097725	0.740683	0.0517036	0.868478	0.335566	0.270329	0.129445	0.805783	0.204541	0.447592	0.230336	0.691505	0.203052	0.676304	0.13692	0.699579	0.136729	0.902138	0.0977077	1.41621	0.0981665	0.842913	0.186271	0.754461	0.0829613	0.252359	0.0704655	0.623663	0.0212678	0.128868	0.0468311	0.224531	0.0554249	0.289051	0.0216591	0.327617	0.0752388
11.234	0.16005	0.16005	0.214425	1.06553	0.0157031	0.944046	0.101826	0.832796	0.0822628	0.818425	0.179148	0.837757	0.0962228	0.648115	0.142705	0.918371	0.365055	0.301941	0.0754018	0.788109	0.187554	0.433051	0.276111	0.777607	0.224201	0.639202	0.0906089	0.579389	0.0985279	0.955434	0.101021	1.25574	0.124939	0.776849	0.219687	0.698102	0.0690726	0.233338	0.0696449	0.634597	0.0470706	0.116959	0.0535784	0.208205	0.0547085	0.268691	0.0264965	0.364449	0.0464044
11.371	0.153981	0.153981	0.220212	0.987716	0.128441	0.979143	0.234743	0.880163	0.137939	0.750395	0.109429	0.92631	0.0935939	0.652559	0.0290345	0.791348	0.398012	0.274376	0.215026	0.766632	0.247743	0.428299	0.26901	0.882946	0.279762	0.576555	0.160435	0.708256	0.204366	0.781192	0.133024	1.13831	0.123688	0.753051	0.24754	0.639323	0.0700535	0.22405	0.0626247	0.592582	0.0663496	0.124806	0.0376516	0.173177	0.0538558	0.247634	0.0630263	0.365526	0.0421831
11.508	0.150583	0.150583	0.215423	0.974691	0.0689792	0.969609	0.210234	0.949444	0.143455	0.837024	0.114066	0.831248	0.138762	0.655007	0.0898749	0.679972	0.379104	0.386729	0.196119	0.780936	0.248148	0.444492	0.381368	0.766761	0.115671	0.622696	0.056257	0.706742	0.170538	0.933689	0.137353	1.15054	0.130173	0.700317	0.300463	0.585611	0.0906403	0.23105	0.0944119	0.664081	0.0393482	0.124727	0.023328	0.196365	0.0612793	0.255733	0.0890206	0.380886	0.04008
11.645	0.220573	0.220573	0.175197	0.935017	0.0624652	0.966269	0.134652	0.904478	0.186807	0.755568	0.205965	0.932747	0.180778	0.564558	0.111565	0.937548	0.357021	0.334354	0.20595	0.73885	0.24023	0.438029	0.482153	0.655997	0.125504	0.693505	0.158471	0.625503	0.294975	0.944673	0.192458	1.08471	0.164946	0.705672	0.422437	0.5939	0.0915392	0.223102	0.117799	0.65915	0.0313776	0.124695	0.0458776	0.185825	0.0669696	0.25837	0.0975094	0.376896	0.0466476
11.782	0.238107	0.238107	0.166802	0.933791	0.0606325	0.956962	0.17727	0.880369	0.248479	0.825707	0.201562	0.839163	0.141623	0.612662	0.145172	0.811014	0.361528	0.322963	0.307313	0.749048	0.190937	0.401255	0.675162	0.611206	0.196079	0.713585	0.209873	0.614578	0.251965	0.967345	0.155086	0.987479	0.199924	0.666446	0.491577	0.629984	0.0643346	0.207566	0.117168	0.622697	0.0269085	0.130685	0.0684188	0.157041	0.0526276	0.252289	0.104908	0.357762	0.0630211
11.919	0.252198	0.252198	0.218991	0.901997	0.0466849	0.951749	0.146569	0.932797	0.196562	0.798088	0.267632	0.742139	0.112545	0.542053	0.222578	0.867567	0.447232	0.297173	0.41693	0.710126	0.283821	0.365548	0.793495	0.646042	0.215523	0.760375	0.15883	0.641953	0.185545	0.895802	0.170232	0.947559	0.207064	0.587221	0.59128	0.636	0.060291	0.239251	0.0964206	0.597365	0.0314067	0.130457	0.0817474	0.180428	0.0289149	0.263287	0.11875	0.349988	0.0722896
12.056	0.268875	0.268875	0.234846	0.860408	0.101967	0.926453	0.0922104	0.919394	0.192912	0.848189	0.270008	0.69422	0.193112	0.683316	0.18339	0.904068	0.325209	0.508008	0.496746	0.843193	0.298473	0.370553	0.975545	0.65932	0.243121	0.716983	0.134391	0.613819	0.148494	0.769415	0.282282	0.84347	0.205219	0.528829	0.679336	0.600103	0.0609036	0.340273	0.0894671	0.610386	0.0220596	0.118063	0.0723648	0.188472	0.0304705	0.288107	0.120709	0.335481	0.0585906
12.193	0.303126	0.303126	0.183751	0.891165	0.0481896	0.999453	0.0438561	0.847858	0.103812	0.780121	0.199655	0.563819	0.159692	0.629988	0.168276	0.838781	0.264203	0.356289	0.540939	0.724108	0.254955	0.301524	1.13694	0.552449	0.341706	0.670323	0.144406	0.585383	0.114019	0.788784	0.190113	0.847944	0.254239	0.524182	0.708627	0.6231	0.0786719	0.302954	0.1005	0.603163	0.0236068	0.110705	0.0430195	0.210479	0.0597592	0.299011	0.129155	0.309696	0.0614526
12.33	0.297992	0.297992	0.144898	0.879146	0.0751588	0.956962	0.0553678	0.871828	0.170265	0.722824	0.251359	0.832255	0.0668323	0.63505	0.187562	0.805334	0.310008	0.366534	0.553725	0.638096	0.230313	0.256323	1.07651	0.58187	0.277046	0.732089	0.119002	0.611415	0.172487	0.872003	0.171248	0.905924	0.351314	0.642016	0.677369	0.602493	0.0933362	0.302006	0.117577	0.587939	0.0342591	0.126644	0.0378986	0.271189	0.0711146	0.23597	0.177731	0.31167	0.0801592
12.467	0.263413	0.263413	0.157866	0.856801	0.189408	0.874832	0.0605557	0.824428	0.0987919	0.740023	0.288553	0.765579	0.203784	0.689086	0.219094	0.844581	0.269271	0.324426	0.64416	0.583532	0.0962238	0.217059	0.859243	0.574321	0.282859	0.699066	0.0679268	0.720661	0.16616	0.845661	0.149466	0.817666	0.320902	0.634621	0.594395	0.573608	0.0999532	0.306663	0.1091	0.613356	0.0350162	0.189943	0.0219496	0.307003	0.05389	0.171846	0.196285	0.299985	0.0876792
12.604	0.239862	0.239862	0.183954	0.843595	0.111407	0.873361	0.132562	0.854284	0.181126	0.808633	0.27141	0.695264	0.184947	0.63351	0.252654	0.818263	0.430789	0.347225	0.695313	0.643733	0.250972	0.251832	0.775928	0.570642	0.410911	0.641128	0.0577468	0.702092	0.11445	0.862449	0.113336	0.830038	0.263568	0.554974	0.475791	0.61151	0.112371	0.328447	0.110802	0.6244	0.05202	0.212415	0.00917805	0.308992	0.0399785	0.167953	0.184809	0.276596	0.0804307
12.741	0.237862	0.237862	0.160512	0.826249	0.0632175	0.701307	0.104346	0.815843	0.166523	0.742416	0.324295	0.672479	0.219895	0.633642	0.246673	0.747522	0.354937	0.315913	0.781173	0.666781	0.277517	0.215598	0.765163	0.552021	0.391304	0.609099	0.106573	0.723805	0.0901787	0.902892	0.0869872	0.838982	0.241556	0.518387	0.406491	0.631718	0.0899458	0.304153	0.124729	0.590156	0.066735	0.177167	0.00618018	0.278749	0.0491014	0.176144	0.166482	0.272187	0.0727679
12.878	0.226648	0.226648	0.202614	0.850985	0.0291427	0.62773	0.069476	0.834581	0.219104	0.784626	0.305102	0.682661	0.140526	0.569938	0.286506	0.790805	0.49975	0.281152	0.833843	0.63446	0.278099	0.241968	0.722733	0.543832	0.519136	0.585776	0.068313	0.781769	0.0701129	0.941481	0.10981	0.831786	0.219433	0.507941	0.390697	0.627292	0.0922742	0.302118	0.132952	0.522433	0.06439	0.175954	0.00905356	0.256191	0.068129	0.230748	0.168132	0.258962	0.0751243
13.015	0.265354	0.265354	0.261889	0.797477	0.0707347	0.652851	0.048334	0.738578	0.229288	0.819804	0.214431	0.574896	0.156042	0.597571	0.296917	0.782142	0.500248	0.283319	0.876178	0.659458	0.276443	0.233913	0.595326	0.480977	0.542047	0.561745	0.0830865	0.768562	0.154146	0.960178	0.103983	0.879364	0.208087	0.600049	0.407956	0.635865	0.105672	0.28541	0.129473	0.476204	0.0813257	0.239373	0.00834753	0.262839	0.0658665	0.226545	0.133873	0.273886	0.0773918
13.152	0.271036	0.271036	0.161745	0.826023	0.0930354	0.613477	0.0564125	0.898641	0.220618	1.0669	0.192282	0.721811	0.181576	0.655673	0.305957	0.669994	0.488241	0.286493	0.858616	0.546258	0.268714	0.28307	0.804503	0.637938	0.600778	0.585367	0.112519	0.773512	0.112596	0.878721	0.180563	0.940268	0.194897	0.665814	0.455939	0.641687	0.120704	0.283151	0.149628	0.435827	0.097038	0.293767	0.0350025	0.237434	0.0606479	0.237683	0.125715	0.298791	0.0640207
13.289	0.236527	0.236527	0.150832	0.816084	0.00542728	0.581899	0.109676	0.951092	0.233228	0.999527	0.260191	0.718234	0.174718	0.53672	0.188777	0.636073	0.567167	0.223926	0.706689	0.594014	0.344333	0.270978	0.666665	0.578715	0.782298	0.61059	0.132217	0.820048	0.120021	0.811248	0.167256	1.15855	0.204234	0.696768	0.526321	0.656282	0.100607	0.234593	0.194991	0.365705	0.0715645	0.2595	0.0446254	0.225406	0.044936	0.198518	0.129545	0.325278	0.0688962
13.426	0.264903	0.264903	0.205336	0.804888	0.0789206	0.573973	0.126492	0.925807	0.120775	0.934903	0.234098	0.786678	0.241449	0.637528	0.340648	0.508948	0.429016	0.171588	0.76327	0.484215	0.308012	0.263121	0.553779	0.598719	0.899747	0.521325	0.114418	0.865818	0.14037	0.746894	0.178776	1.33041	0.224392	0.677845	0.574586	0.69769	0.14464	0.212754	0.149053	0.327727	0.0723446	0.221332	0.0460029	0.234523	0.0339746	0.203891	0.142231	0.34995	0.0876459
13.563	0.27704	0.27704	0.24022	0.798069	0.196585	0.564885	0.0964855	0.9328	0.285414	0.937511	0.210226	0.654733	0.196298	0.689335	0.222494	0.591044	0.335786	0.252579	0.845723	0.476755	0.239856	0.294764	0.480544	0.528202	0.965558	0.520176	0.146875	0.820197	0.109382	0.719121	0.117781	1.29115	0.227364	0.725928	0.582081	0.690365	0.139207	0.226672	0.135339	0.305328	0.0860178	0.225605	0.00983105	0.227422	0.0461339	0.232621	0.130042	0.356226	0.104659
13.7	0.290473	0.290473	0.20346	0.785257	0.248446	0.526094	0.0884526	0.974727	0.391737	0.989357	0.190008	0.646213	0.20897	0.632148	0.29938	0.565706	0.422676	0.260491	0.864138	0.467642	0.300072	0.336072	0.589145	0.527889	0.871466	0.483117	0.17301	0.777781	0.0890866	0.763672	0.181295	1.46951	0.237157	0.693634	0.621833	0.696397	0.11907	0.270768	0.148235	0.325345	0.101592	0.206017	0.00883743	0.217112	0.0503907	0.255826	0.11342	0.335255	0.116248
13.837	0.300875	0.300875	0.268369	0.760805	0.356098	0.546626	0.069542	0.997414	0.535919	0.899022	0.21837	0.698558	0.313586	0.621367	0.349	0.645722	0.436968	0.143241	0.909167	0.449131	0.33326	0.288791	0.651586	0.600638	0.963371	0.298249	0.091832	0.732592	0.0988057	0.763822	0.289232	1.58972	0.256355	0.639651	0.64373	0.642054	0.159427	0.291128	0.151949	0.3298	0.0900785	0.161651	0.0348422	0.19982	0.036668	0.240062	0.0931036	0.32173	0.124576
13.974	0.268166	0.268166	0.421529	0.829179	0.503496	0.562927	0.100755	0.98869	0.616067	0.749719	0.19234	0.626727	0.385473	0.621106	0.20098	0.585238	0.430703	0.100772	1.12538	0.51071	0.378164	0.292998	0.747088	0.448277	1.11834	0.213692	0.146815	0.723382	0.102499	0.673453	0.182629	1.38136	0.273516	0.646414	0.606643	0.588023	0.18851	0.264855	0.153034	0.329837	0.116557	0.134967	0.0445188	0.189412	0.0159124	0.215749	0.0918295	0.315626	0.141868
14.111	0.225397	0.225397	0.601082	0.933522	0.576648	0.559453	0.147147	1.03801	0.614625	0.837992	0.125757	0.643125	0.342584	0.638323	0.308197	0.547232	0.485619	0.0336526	0.931722	0.527489	0.345747	0.33643	0.91664	0.377403	1.08149	0.164304	0.152177	0.801896	0.173776	0.724714	0.178863	1.22666	0.266153	0.642081	0.513376	0.634121	0.197497	0.277852	0.148775	0.340816	0.138352	0.129632	0.0179501	0.166118	0.0297663	0.245492	0.125801	0.326385	0.132806
14.248	0.250651	0.250651	0.698243	0.967048	0.688056	0.603234	0.148324	1.02336	0.507861	0.841767	0.16465	0.700279	0.347897	0.592284	0.292661	0.575241	0.513837	0	0.851622	0.492005	0.351218	0.338814	1.11124	0.402959	0.890377	0.118112	0.286867	0.779405	0.273549	0.664837	0.19177	1.12492	0.268316	0.599002	0.456237	0.609142	0.229847	0.274003	0.124183	0.344533	0.142645	0.113975	0.00697237	0.181855	0.0497337	0.269146	0.11635	0.323599	0.169784
14.385	0.286932	0.286932	0.744702	1.00415	0.693901	0.605151	0.114575	1.00566	0.615979	0.807426	0.146902	0.723158	0.426122	0.630459	0.256025	0.529183	0.523412	0.0420777	0.607699	0.44078	0.192544	0.282861	1.05825	0.415336	0.853023	0.0779889	0.216112	0.794954	0.381629	0.618079	0.199957	0.978488	0.245466	0.596081	0.444083	0.575349	0.241163	0.310792	0.110926	0.346712	0.133379	0.120538	0.0197249	0.174696	0.0537046	0.253446	0.104548	0.308149	0.14361
14.522	0.248348	0.248348	0.801706	1.05327	0.604962	0.573661	0.171165	0.91507	0.684206	0.795505	0.208192	0.685384	0.322853	0.618462	0.170081	0.474467	0.491368	0.0512417	0.526025	0.441474	0.253337	0.352859	0.878356	0.510079	0.973574	0.045268	0.279662	0.698001	0.34838	0.622864	0.170719	0.877804	0.225471	0.624396	0.391218	0.56601	0.240141	0.405036	0.169736	0.329388	0.125705	0.116376	0.0261149	0.184281	0.0594387	0.215943	0.115322	0.29795	0.171903
14.659	0.264587	0.264587	0.854926	1.04821	0.430337	0.556781	0.179623	0.969217	0.621782	0.800359	0.231228	0.664342	0.452006	0.682145	0.179551	0.526123	0.33818	0.00488363	0.587857	0.485488	0.275969	0.29025	0.668483	0.460477	0.963835	0.0532526	0.384943	0.683016	0.285927	0.60831	0.267266	0.709257	0.209425	0.659947	0.311496	0.52982	0.284338	0.457248	0.13951	0.342964	0.120128	0.0917473	0.0380306	0.165995	0.0701285	0.215836	0.121275	0.299323	0.222703
14.796	0.301217	0.301217	0.865954	1.08006	0.341147	0.554819	0	0.934054	0.620016	0.808359	0.213949	0.517075	0.57797	0.665096	0.253304	0.618553	0.380866	0.0258986	0.709341	0.511271	0.22275	0.307543	0.545888	0.352475	0.777576	0.0947247	0.365066	0.580107	0.314931	0.57239	0.394972	0.638168	0.235363	0.665558	0.302117	0.50691	0.291119	0.448044	0.174232	0.33373	0.107231	0.0882609	0.0302378	0.227998	0.0627401	0.233058	0.128283	0.299444	0.263747
14.933	0.319106	0.319106	0.811538	1.09593	0.328788	0.53273	0.0535321	0.965484	0.573965	0.653553	0.232567	0.40544	0.446824	0.6266	0.146805	0.601547	0.492071	0.0833384	0.953502	0.613613	0.339698	0.310868	0.633832	0.312706	0.814776	0.123353	0.424302	0.600821	0.345051	0.529524	0.425203	0.569265	0.283851	0.624984	0.338213	0.52301	0.302392	0.459368	0.0857599	0.353397	0.0811282	0.100917	0.0388231	0.221142	0.0530524	0.227501	0.142143	0.290155	0.270858
15.07	0.497032	0.497032	0.719866	1.01209	0.318763	0.503645	0.0570769	1.04543	0.613095	0.619113	0.393233	0.542814	0.831391	0.700399	0.0963584	0.677123	0.446068	0.086063	0.915004	0.563551	0.387415	0.42581	0.565737	0.427404	0.781439	0.0689252	0.455472	0.549482	0.299727	0.539206	0.344756	0.535066	0.315475	0.57484	0.383187	0.532738	0.331966	0.398063	0.10243	0.372164	0.062438	0.0822922	0.0185665	0.18633	0.0461516	0.255588	0.10438	0.271042	0.272437
15.207	0.530502	0.530502	0.580521	0.89383	0.356014	0.505606	0.09289	0.953927	0.613385	0.66922	0.390222	0.487487	0.947007	0.605277	0.167622	0.677346	0.462492	0.0507038	0.841976	0.551265	0.360291	0.415039	0.789645	0.377933	0.691656	0.0160679	0.465979	0.448605	0.334547	0.621051	0.169866	0.437541	0.373497	0.553363	0.436044	0.515846	0.337807	0.386683	0.146962	0.375868	0.0861475	0.0527403	0.0184518	0.168579	0.0500208	0.257099	0.0955716	0.324378	0.333098
15.344	0.584654	0.584654	0.557657	0.82985	0.379395	0.530947	0.14485	0.794352	0.630099	0.607805	0.291122	0.452907	1.0049	0.697491	0.25327	0.662711	0.563883	0.0296436	0.695239	0.517953	0.332659	0.371794	0.670256	0.360504	0.676637	0.021082	0.283772	0.419814	0.264769	0.580722	0.11821	0.485625	0.377123	0.480424	0.404355	0.540159	0.356638	0.370841	0.126138	0.322745	0.100756	0.0466042	0.021907	0.199213	0.0531451	0.292003	0.073766	0.316394	0.425384
15.481	0.627894	0.627894	0.549948	0.748026	0.312165	0.55424	0.166935	0.905175	0.614575	0.519628	0.358482	0.452202	1.02861	0.759065	0.471406	0.644865	0.595531	0.0858318	0.495045	0.564173	0.263994	0.319279	0.74998	0.275404	0.825963	0.0407375	0.481755	0.484895	0.22012	0.589312	0.201951	0.490941	0.356806	0.409467	0.333194	0.527671	0.396668	0.382695	0.101506	0.298773	0.111712	0.0505946	0.00236533	0.188366	0.0569103	0.282211	0.0927206	0.313168	0.477029
15.618	0.610011	0.610011	0.531308	0.748932	0.280932	0.581542	0.187317	0.930708	0.516825	0.47037	0.395473	0.487955	0.918891	0.758168	0.343238	0.67658	0.618886	0.101016	0.402577	0.599986	0.134825	0.383777	0.785638	0.265099	0.850759	0.0243971	0.499926	0.556479	0.245752	0.523655	0.160812	0.412209	0.39218	0.376961	0.31425	0.481271	0.404837	0.370339	0.108511	0.335645	0.169119	0.104322	0.00914952	0.204548	0.0392665	0.292588	0.0904583	0.338097	0.468701
15.755	0.705765	0.705765	0.471003	0.761482	0.365364	0.56542	0.220772	0.871436	0.511893	0.433681	0.46989	0.405009	0.873508	0.694358	0.736513	0.841798	0.850267	0.127816	0.371716	0.727337	0.154994	0.334938	0.834687	0.328473	0.701618	0.0360867	0.35278	0.50256	0.194704	0.524999	0.205254	0.323411	0.412377	0.340702	0.363609	0.455581	0.366033	0.357314	0.132309	0.364509	0.159489	0.0864218	0.0270754	0.137459	0.0532672	0.249594	0.0632137	0.354022	0.395345
15.892	0.88678	0.88678	0.478164	0.783839	0.321354	0.477947	0.214103	0.779086	0.633446	0.435362	0.618254	0.456668	0.816229	0.602444	0.470521	0.662603	1.01923	0.117265	0.264691	0.796095	0.120905	0.38412	0.738021	0.289862	0.590317	0	0.364555	0.478239	0.272639	0.476835	0.233828	0.35929	0.41943	0.307177	0.39212	0.49761	0.338828	0.290068	0.143995	0.365085	0.131584	0.0857072	0.0383833	0.182852	0.0517523	0.243663	0.0484642	0.370628	0.362196
16.029	1.08986	1.08986	0.631076	0.844876	0.327199	0.471977	0.232998	0.775611	0.608427	0.401322	0.718095	0.47446	0.868524	0.542857	0.607345	0.660257	1.13044	0.187408	0.225012	0.853481	0.148433	0.441428	0.668281	0.215721	0.679099	0.0438095	0.55776	0.498908	0.309968	0.416946	0.209141	0.465055	0.48507	0.28781	0.534556	0.416026	0.343894	0.232333	0.118967	0.369498	0.127175	0.0878754	0.0501365	0.237212	0.0361535	0.239405	0.0765897	0.432822	0.307107
16.166	1.32493	1.32493	0.793959	0.97896	0.362779	0.539322	0.265672	0.772472	0.581588	0.407395	0.832577	0.519804	0.907173	0.382626	0.424571	0.677851	1.01752	0.247442	0.281876	0.885858	0.198843	0.370256	0.740173	0.216968	0.744909	0.0468842	0.517017	0.426199	0.261195	0.442736	0.202418	0.454633	0.597644	0.251425	0.633571	0.40377	0.347652	0.264074	0.0951052	0.392901	0.142683	0.124855	0.0204563	0.227029	0.0251367	0.225382	0.0923891	0.435163	0.220873
16.303	1.45055	1.45055	0.826064	1.00416	0.386996	0.559007	0.273381	0.776627	0.631293	0.456309	0.864723	0.537627	0.997838	0.281263	0.360449	0.602478	0.879023	0.111748	0.392722	0.783713	0.214362	0.392457	0.899833	0.151392	0.777899	0.028754	0.630809	0.349998	0.284284	0.43359	0.337117	0.544005	0.692469	0.188661	0.638213	0.389217	0.416275	0.325937	0.129211	0.356752	0.141918	0.163616	0.0140828	0.211537	0.0360729	0.171644	0.11548	0.393871	0.239699
16.44	1.39321	1.39321	0.837347	0.928673	0.401696	0.556781	0.267062	0.77646	0.582605	0.423485	0.865036	0.449386	0.967916	0.215155	0.286734	0.505485	0.882374	0.20658	0.430101	0.834178	0.205678	0.332696	0.959972	0.101721	0.743097	0.0383066	0.592149	0.289687	0.362353	0.382321	0.379258	0.456126	0.782352	0.185469	0.497689	0.327118	0.572965	0.208626	0.252187	0.42797	0.123683	0.17734	0.0326282	0.219087	0.0518727	0.179707	0.124192	0.391282	0.253007
16.577	1.28372	1.28372	0.902447	0.927957	0.422569	0.581055	0.207206	0.741924	0.525899	0.367756	0.834166	0.481986	0.958519	0.183891	0.249322	0.554797	0.712164	0.235772	0.375549	0.821118	0.1983	0.327843	0.764408	0.139591	0.479754	0.102792	0.560216	0.26564	0.395582	0.37384	0.342246	0.491004	0.875744	0.170579	0.402776	0.329508	0.619735	0.251551	0.213428	0.467977	0.119985	0.170593	0.030677	0.209324	0.0717859	0.259889	0.0977424	0.388105	0.19254
16.714	1.20652	1.20652	0.901245	0.962187	0.403111	0.548005	0.187088	0.670347	0.557423	0.291822	0.82154	0.400899	1.07528	0.132984	0.218039	0.565092	0.716461	0.278163	0.424009	0.802091	0.187924	0.420588	0.885577	0.124365	0.4814	0.132262	0.590862	0.198941	0.417023	0.286788	0.238962	0.434984	0.932025	0.122806	0.407572	0.3313	0.540123	0.264632	0.173894	0.429673	0.124256	0.165715	0.020473	0.227332	0.0704984	0.292403	0.0969338	0.351008	0.175071
16.851	1.14169	1.14169	0.962364	0.948841	0.484455	0.56315	0.216091	0.668939	0.694344	0.288913	0.854731	0.393417	1.1522	0.168191	0.267925	0.501031	0.807241	0.333344	0.469694	0.67203	0.155765	0.429133	0.977981	0.137512	0.584371	0.194044	0.738574	0.197238	0.600647	0.198962	0.231434	0.446412	0.935405	0.145799	0.405347	0.321746	0.462187	0.200203	0.165148	0.405667	0.124349	0.154214	0.0318314	0.286849	0.0507913	0.245408	0.106114	0.321666	0.168155
16.988	0.988092	0.988092	0.976368	0.921177	0.546503	0.621228	0.224717	0.61211	0.802878	0.294652	0.863326	0.38445	1.34988	0.112688	0.364102	0.438086	0.810794	0.301594	0.377615	0.529487	0.236269	0.317083	0.927207	0.230648	0.60925	0.316291	0.663809	0.137272	0.571288	0.24986	0.227731	0.426773	0.912891	0.167286	0.429653	0.32275	0.40157	0.129192	0.145426	0.424663	0.12799	0.137094	0.0407947	0.298045	0.0547891	0.224699	0.116011	0.275824	0.11775
17.125	0.887438	0.887438	1.02253	0.924117	0.580494	0.605415	0.160064	0.596018	0.920945	0.317611	0.934823	0.366742	1.23456	0.0680015	0.593484	0.443589	0.881226	0.291676	0.437833	0.613963	0.209323	0.370679	0.969428	0.128296	0.458399	0.343939	0.5533	0.143086	0.677265	0.230042	0.349268	0.541895	0.871663	0.171539	0.496211	0.340005	0.288015	0.147433	0.151678	0.424156	0.125416	0.106878	0.0411129	0.31693	0.0615967	0.246233	0.129936	0.25497	0.138035
17.262	0.82249	0.82249	1.04912	0.950174	0.574649	0.643184	0.28297	0.611153	1.02313	0.275237	1.02044	0.348108	1.19482	0.101591	0.680865	0.394951	0.919049	0.248394	0.425059	0.569919	0.25761	0.488584	0.943333	0.126617	0.464641	0.389934	0.421153	0.144624	0.754951	0.152101	0.262705	0.596692	0.872231	0.149666	0.607219	0.358563	0.275433	0.176607	0.192367	0.409121	0.0977971	0.0658849	0.0402979	0.310752	0.0593724	0.267742	0.133429	0.233936	0.145558
17.399	0.705739	0.705739	1.00788	0.942049	0.452053	0.669107	0.24417	0.523593	0.976911	0.212112	1.02045	0.377605	1.11731	0.0630474	0.714899	0.439564	0.896562	0.323142	0.402733	0.517498	0.329812	0.392465	0.7819	0.172919	0.39331	0.466283	0.389817	0.189929	0.830007	0.0746506	0.327885	0.523161	0.879968	0.159989	0.69692	0.324593	0.314933	0.186508	0.156293	0.428885	0.0877588	0.0727826	0.0434964	0.275051	0.061142	0.264804	0.145153	0.229505	0.103103
17.536	0.72199	0.72199	0.940276	0.873275	0.567633	0.703625	0.292697	0.449248	1.00056	0.215801	0.970394	0.364091	1.10977	0.0671193	0.644639	0.379117	0.973812	0.281984	0.320657	0.471788	0.4077	0.340959	0.705488	0.165523	0.322524	0.367508	0.522199	0.170186	0.935773	0.0429337	0.407899	0.518899	0.819971	0.172962	0.748837	0.264933	0.380819	0.163331	0.102613	0.453716	0.112901	0.0736664	0.0536848	0.241284	0.0491477	0.254928	0.148257	0.230383	0.0501191
17.673	0.815022	0.815022	0.902116	0.800664	0.559113	0.69191	0.239819	0.439422	0.924755	0.231551	1.05127	0.292703	0.951476	0.061496	0.606004	0.492068	0.877216	0.298216	0.425981	0.54668	0.439254	0.286328	0.584719	0.141721	0.327705	0.359396	0.499526	0.208115	1.01472	0.0361113	0.315869	0.470671	0.799271	0.155547	0.767701	0.290536	0.238099	0.219978	0.0714222	0.478472	0.141442	0.044342	0.0601811	0.225962	0.0578791	0.244754	0.133216	0.230233	0.0556721
17.81	0.925448	0.925448	1.05363	0.887383	0.579491	0.692712	0.304107	0.420189	0.731809	0.232764	1.08066	0.260652	0.89675	0.141128	0.419838	0.432346	0.706471	0.267029	0.486785	0.623234	0.367808	0.294858	0.676501	0.171561	0.456216	0.385564	0.437614	0.259787	1.12948	0.0397492	0.446788	0.508997	0.851221	0.143834	0.657349	0.30148	0.270368	0.264743	0.0734388	0.474634	0.133001	0.059354	0.0969685	0.22595	0.0787755	0.229683	0.137816	0.22208	0.0875828
17.947	1.08975	1.08975	1.06404	0.835666	0.633108	0.740859	0.317156	0.392793	0.601624	0.203891	1.02949	0.24344	0.955523	0.0948846	0.399679	0.497611	0.74371	0.319635	0.349579	0.514447	0.288402	0.29497	0.749306	0.174548	0.422965	0.407519	0.593377	0.211447	0.980815	0	0.444159	0.578535	0.92649	0.154316	0.642155	0.275461	0.258277	0.258496	0.0656482	0.430615	0.123046	0.031801	0.127037	0.215291	0.102444	0.242077	0.150804	0.232521	0.11346
18.084	1.21723	1.21723	1.11601	0.709829	0.728477	0.698635	0.379897	0.416273	0.627227	0.19609	1.09591	0.242448	1.01595	0.0824588	0.289278	0.427815	0.652493	0.438888	0.383916	0.541622	0.268737	0.306839	0.759974	0.159812	0.435303	0.438162	0.581105	0.276046	1.14663	0.0342842	0.401922	0.531343	0.963524	0.159006	0.707686	0.244924	0.243736	0.238637	0.124152	0.426795	0.121174	0.03575	0.105575	0.195279	0.100713	0.244618	0.129248	0.229702	0.114442
18.221	1.18767	1.18767	1.11507	0.670423	1.01835	0.688391	0.439819	0.427069	0.618208	0.22221	1.05904	0.20987	0.92904	0.0891773	0.331524	0.379617	0.555972	0.507815	0.443654	0.641064	0.210371	0.319858	0.797203	0.188764	0.387777	0.390925	0.592917	0.24643	1.23305	0.0132734	0.438216	0.522978	1.09592	0.15819	0.841535	0.22542	0.215306	0.233198	0.11795	0.418081	0.11483	0.0504216	0.0869775	0.185569	0.0911249	0.235405	0.117042	0.212784	0.128011
18.358	1.13918	1.13918	1.06366	0.63938	1.21101	0.549833	0.376165	0.43627	0.603028	0.221346	1.06906	0.163191	1.03916	0.0810545	0.37981	0.415317	0.633028	0.584302	0.481423	0.586411	0.269118	0.3648	0.793188	0.239086	0.370485	0.482492	0.553503	0.266206	1.05235	0.024859	0.395642	0.571841	1.29832	0.146553	1.00695	0.210876	0.200601	0.214595	0.0838612	0.407908	0.117665	0.0750824	0.0998943	0.215591	0.0886372	0.217691	0.109238	0.188826	0.14983
18.495	1.05607	1.05607	0.995136	0.640527	1.21811	0.557268	0.452086	0.342774	0.585036	0.186826	1.13623	0.203919	1.03703	0.0698709	0.464784	0.344722	0.770267	0.648865	0.462048	0.595564	0.292759	0.357854	0.741288	0.240496	0.294364	0.55777	0.56114	0.247502	0.844493	0.0541642	0.380259	0.779374	1.48243	0.141939	1.07982	0.178022	0.24153	0.202099	0.0734327	0.415165	0.114444	0.077008	0.104075	0.235779	0.111817	0.215237	0.107993	0.207976	0.101685
18.632	1.06859	1.06859	1.05238	0.64182	1.20984	0.441067	0.535676	0.344443	0.566652	0.146708	1.13494	0.170364	0.928242	0.113978	0.367324	0.256797	0.828213	0.657943	0.369109	0.644873	0.312443	0.381834	0.752352	0.272614	0.262569	0.492822	0.64207	0.205413	0.769192	0.0309276	0.412093	0.744978	1.58151	0.146268	1.03464	0.134472	0.286381	0.184975	0.0861022	0.441199	0.115752	0.0642639	0.0888593	0.202109	0.102813	0.196929	0.107804	0.225876	0.0639128
18.769	1.06612	1.06612	1.00999	0.628941	1.02052	0.418219	0.535929	0.343667	0.694369	0.170349	1.093	0.153639	0.879913	0.131862	0.382544	0.288118	0.828101	0.713443	0.338543	0.656474	0.42629	0.428822	0.645034	0.268842	0.298625	0.500011	0.648581	0.0626961	0.573463	0.0634556	0.304253	0.725656	1.49628	0.142444	0.968786	0.0947146	0.209996	0.209742	0.089104	0.4535	0.120455	0.0582727	0.079085	0.203211	0.114246	0.151119	0.146855	0.213636	0.0661704
18.906	0.968468	0.968468	0.93833	0.662591	0.813989	0.417149	0.543673	0.364712	0.620096	0.15371	1.08167	0.139442	0.74965	0.0646077	0.315144	0.25656	0.827514	0.720835	0.434893	0.655804	0.549429	0.406549	0.595715	0.235381	0.249217	0.516698	0.707771	0.073621	0.732524	0.0195988	0.377649	0.666414	1.23988	0.133154	0.967093	0.0848806	0.170619	0.183468	0.0909377	0.453089	0.134326	0.0600949	0.067737	0.218243	0.107797	0.139365	0.157058	0.200439	0.087494
19.043	0.879286	0.879286	0.746788	0.628136	0.57515	0.40909	0.595607	0.341743	0.566594	0.201615	1.1785	0.107366	0.627434	0.101333	0.264736	0.296718	0.703606	0.592279	0.332169	0.607096	0.71421	0.434545	0.676958	0.265924	0.244461	0.45876	0.600311	0	0.62409	0.00424967	0.644472	0.756136	1.04525	0.119643	0.911517	0.0760052	0.230134	0.199617	0.101112	0.425695	0.149745	0.0670621	0.0711132	0.217452	0.102025	0.156066	0.169283	0.179634	0.079808
19.18	0.879718	0.879718	0.616524	0.589002	0.432594	0.481998	0.478725	0.344038	0.575874	0.281783	1.06086	0.0782617	0.680594	0.143472	0.310259	0.301538	0.710151	0.50885	0.360922	0.635999	0.82062	0.421387	0.650317	0.224871	0.302848	0.424562	0.663386	0.0467756	0.558336	0.0500156	0.772983	0.687575	0.912598	0.124442	0.769578	0.0483658	0.239161	0.169132	0.120767	0.428669	0.150018	0.0753438	0.0814895	0.222395	0.118328	0.203066	0.156258	0.163534	0.0876144
19.317	0.942415	0.942415	0.626229	0.59339	0.414222	0.426416	0.537785	0.394372	0.514971	0.215556	0.941044	0.193116	0.633856	0.079032	0.230437	0.249454	0.903556	0.486832	0.425297	0.57507	1.0625	0.389869	0.562688	0.18461	0.30244	0.424514	0.667456	0.0955619	0.480046	0.0346064	0.864121	0.708992	0.817313	0.128572	0.606063	0.0350543	0.284012	0.136862	0.116887	0.453332	0.120182	0.0920256	0.0735633	0.200429	0.14793	0.213668	0.138848	0.142219	0.0991688
19.454	0.98521	0.98521	0.586397	0.556235	0.468585	0.498123	0.381997	0.395105	0.595712	0.173927	0.959056	0.146762	0.662656	0.164152	0.280132	0.256808	0.867121	0.41449	0.511771	0.524536	1.24086	0.224361	0.506795	0.208835	0.26555	0.388801	0.640139	0.0942254	0.595536	0.0204318	0.733583	0.819949	0.741176	0.139336	0.556113	0.0293862	0.312686	0.0869645	0.102187	0.475933	0.123071	0.112406	0.0831335	0.18755	0.168753	0.217466	0.0984267	0.114318	0.0596775
19.591	1.07184	1.07184	0.589793	0.543466	0.502493	0.493356	0.591302	0.387585	0.596326	0.226358	1.00083	0.164464	0.512184	0.135274	0.434412	0.282409	0.839573	0.391879	0.365977	0.608002	1.04559	0.231682	0.396012	0.251874	0.253118	0.431179	0.518705	0.0924881	0.508509	0.0523207	0.575492	0.904369	0.646966	0.145752	0.568713	0.0237148	0.277271	0.102249	0.0864575	0.463598	0.135974	0.115208	0.112017	0.189513	0.162109	0.191699	0.0770336	0.128883	0.0547239
19.728	1.14732	1.14732	0.601547	0.537178	0.513515	0.400849	0.68619	0.395471	0.521219	0.212776	0.960292	0.0885255	0.397618	0.130929	0.5444	0.318781	0.893378	0.355477	0.372786	0.571963	0.925906	0.249303	0.38863	0.294511	0.282743	0.394515	0.450318	0.177689	0.459032	0.0289748	0.606281	0.983549	0.575645	0.129157	0.598309	0.017828	0.205666	0.148827	0.113147	0.456118	0.143884	0.102284	0.126248	0.176182	0.129688	0.174932	0.121769	0.112785	0.0820049
19.865	1.12876	1.12876	0.659365	0.525726	0.537146	0.464586	0.7912	0.44962	0.508088	0.240264	1.2809	0.0671902	0.498107	0.152768	0.476131	0.267211	0.687522	0.348475	0.377943	0.53699	0.863371	0.201342	0.340831	0.257142	0.278597	0.50877	0.425981	0.24677	0.449361	0.104931	0.650448	0.804947	0.591339	0.0991886	0.683658	0.0147076	0.200642	0.121299	0.12997	0.427847	0.151831	0.104042	0.123781	0.175434	0.0753537	0.182741	0.162939	0.11053	0.0863025
20.002	0.943872	0.943872	0.76602	0.568447	0.522787	0.463828	0.921607	0.446457	0.52957	0.22036	1.25053	0.0483561	0.548972	0.158817	0.574117	0.237759	0.711651	0.467635	0.411235	0.451517	0.692746	0.161028	0.347756	0.233682	0.224274	0.517754	0.402439	0.28771	0.522333	0.0957488	0.59308	0.828921	0.686417	0.0801243	0.707812	0.00935469	0.202399	0.0948303	0.0924777	0.419757	0.132939	0.120521	0.157422	0.155725	0.115876	0.1849	0.152352	0.102891	0.0672954
20.139	0.732141	0.732141	0.876206	0.620389	0.406872	0.407485	0.92003	0.379637	0.641893	0.217919	1.3671	0.0808752	0.526113	0.162577	0.593745	0.297515	0.627881	0.486662	0.36592	0.43657	0.606913	0.152841	0.338095	0.249367	0.193175	0.481036	0.396723	0.259785	0.541336	0.0755	0.52018	0.820209	0.781711	0.0815216	0.690969	0.0228849	0.209179	0.08716	0.0564095	0.413624	0.114202	0.143833	0.186319	0.17212	0.13222	0.169018	0.157039	0.0880447	0.0354212
20.276	0.651291	0.651291	0.860039	0.638328	0.332961	0.418086	0.794385	0.342274	0.481938	0.269974	1.30974	0.0816237	0.642097	0.204731	0.814235	0.230213	0.568379	0.601318	0.441063	0.449771	0.54946	0.167487	0.346817	0.244351	0.226925	0.516626	0.42216	0.231905	0.629618	0.093938	0.353294	0.975054	0.813649	0.113487	0.674897	0.0426462	0.210732	0.108553	0.0708858	0.40099	0.12799	0.156532	0.180211	0.189549	0.200908	0.176402	0.136769	0.0812469	0.0623718
20.413	0.777232	0.777232	0.752512	0.672799	0.392256	0.466544	0.64064	0.35769	0.460136	0.235547	1.24657	0.0461855	0.48638	0.18486	0.86056	0.25638	0.487602	0.531728	0.458818	0.462164	0.465211	0.177166	0.35323	0.223047	0.185163	0.54268	0.408011	0.338325	0.695625	0.066946	0.41205	1.01643	0.751394	0.141516	0.747657	0.0571286	0.18851	0.133097	0.0642738	0.359164	0.133782	0.158793	0.158713	0.214954	0.204101	0.184787	0.132318	0.0801002	0.07605
20.55	0.982882	0.982882	0.701531	0.712207	0.44278	0.505695	0.606526	0.337471	0.485815	0.204439	1.2306	0.0111932	0.485692	0.173238	0.831555	0.211099	0.504172	0.551315	0.458146	0.455504	0.258958	0.136949	0.320476	0.229583	0.189773	0.516901	0.368569	0.378701	0.570005	0.109429	0.348305	0.912691	0.644725	0.144947	0.827145	0.0544554	0.210895	0.166176	0.0639505	0.347764	0.123551	0.166563	0.15764	0.181495	0.173821	0.174935	0.134176	0.0641123	0.0526307
20.687	1.01879	1.01879	0.749866	0.740972	0.516858	0.515761	0.618631	0.282569	0.389142	0.229758	1.19445	0	0.432654	0.158556	0.823393	0.196418	0.378977	0.448455	0.466107	0.383009	0.36256	0.263703	0.332214	0.266107	0.193265	0.611172	0.36004	0.322527	0.749366	0.091775	0.208178	1.05113	0.541625	0.134212	0.836982	0.0334523	0.204441	0.186927	0.0724985	0.34195	0.11856	0.177804	0.195813	0.210626	0.204405	0.188857	0.116027	0.0785164	0.0375982
20.824	0.981979	0.981979	0.821415	0.808825	0.583497	0.551256	0.569927	0.200859	0.279851	0.213605	1.46349	0.0136476	0.367485	0.174754	0.842848	0.205856	0.340077	0.522257	0.546367	0.382631	0.403011	0.290958	0.328094	0.380703	0.187496	0.615598	0.389242	0.355726	0.80187	0.106332	0.32552	1.06334	0.469544	0.133197	0.806078	0.0345332	0.147173	0.165786	0.0668597	0.371623	0.0879911	0.192875	0.25223	0.259057	0.216243	0.191841	0.101362	0.0825198	0.0249637
20.961	1.051	1.051	0.850722	0.839115	0.533057	0.480842	0.481697	0.128081	0.369262	0.290984	1.75488	0.026843	0.32857	0.19686	0.767817	0.168246	0.314702	0.373599	0.489142	0.357519	0.344352	0.333299	0.265171	0.317358	0.218217	0.412352	0.38178	0.368453	0.602333	0.0840649	0.303087	1.36671	0.401633	0.12143	0.7609	0.0430161	0.13594	0.192115	0.0649393	0.391873	0.0798213	0.188339	0.206498	0.232068	0.228373	0.183847	0.0770772	0.0888238	0.0513554
21.098	1.02388	1.02388	0.849125	0.803607	0.475852	0.490417	0.417404	0.0814592	0.283824	0.330128	1.73392	0.0113959	0.449246	0.277191	0.809565	0.209467	0.43181	0.366783	0.426945	0.297143	0.376111	0.368652	0.25389	0.31253	0.195164	0.560134	0.34243	0.418626	0.532642	0.109181	0.174745	1.33425	0.342523	0.0965311	0.646382	0.0375281	0.134674	0.193398	0.060875	0.374816	0.107247	0.168018	0.144811	0.199734	0.244992	0.157776	0.0677328	0.100955	0.100852
21.235	0.962813	0.962813	0.88635	0.775343			0.525705	0.0818177	0.256081	0.336118	1.7325	0.0464599	0.452732	0.294766	0.870773	0.235948	0.384475	0.361771	0.304251	0.274557	0.447418	0.398155	0.361653	0.386278			0.273928	0.432615	0.586042	0.143965	0.188018	1.46659	0.312314	0.0809367	0.509341	0	0.147091	0.214511	0.0582285	0.388785	0.0844318	0.116765	0.120517	0.201997	0.285906	0.195731	0.0965816	0.0801605	0.0985386
21.372	0.891417	0.891417	0.940295	0.714778			0.375059	0.00349796	0.256035	0.319926	1.6008	0.0666725	0.376523	0.337877	0.727056	0.181967	0.311848	0.315455	0.365641	0.185085	0.464833	0.473942	0.335319	0.401237			0.220531	0.425978	0.714939	0.179767	0.34739	1.49043	0.294293	0.0792505	0.465605	0.0179952	0.186713	0.205168	0.0413639	0.362954	0.0745446	0.108456	0.104642	0.212809	0.317231	0.247081	0.0912542	0.0790705	0.0653193
21.509	0.804653	0.804653	0.900832	0.602301			0.3118	0.0586038	0.197483	0.310743	1.63022	0.147744	0.376802	0.4157	0.581002	0.202756	0.357945	0.267293	0.395772	0.320472	0.444039	0.485413	0.328962	0.438777			0.238712	0.435866	0.629637	0.194046	0.247544	1.64677	0.308675	0.0891979	0.458129	0.0492311	0.184589	0.164503	0.0512767	0.337197	0.0951479	0.159883	0.0883887	0.203428	0.278112	0.20209	0.0846	0.0870443	0.0521143
21.646	0.872121	0.872121	0.880162	0.527797			0.358567	0.0501994	0.164114	0.276595	1.518	0.128255	0.347812	0.387076	0.644453	0.259008	0.378348	0.235694	0.394964	0.27604	0.430736	0.449432	0.353328	0.395297			0.253343	0.536671	0.523497	0.215829	0.224268	1.45068	0.329186	0.0791313	0.477468	0.0395451	0.139249	0.129025	0.0501918	0.290982	0.122862	0.173915	0.0773046	0.186918	0.210762	0.181158	0.0775822	0.0701	0.0640813
21.783	0.891642	0.891642	0.892894	0.53547			0.317211	0.00186764	0.142926	0.372789	1.43693	0.138026	0.333398	0.339383	0.706255	0.217307	0.357776	0.288298	0.431647	0.243927	0.324333	0.42228	0.325467	0.421262			0.295254	0.591271	0.701982	0.23028	0.259136	1.30171	0.313686	0.0611177	0.431671	0.0378369	0.0945613	0.121048	0.0511277	0.220764	0.118587	0.146394	0.0789161	0.186781	0.154791	0.201054	0.0643855	0.0611825	0.0722099
21.92	0.875513	0.875513	0.938393	0.471783			0.357573	0.0351499	0.111625	0.442874	1.35487	0.126418	0.303243	0.289404	0.625074	0.266534	0.329813	0.226376	0.400609	0.306126	0.335587	0.333158	0.346802	0.506869			0.244409	0.608996	0.615032	0.174286	0.384618	1.26489	0.318339	0.0734915	0.511868	0.0240558	0.0850853	0.149051	0.060693	0.161347	0.10497	0.127956	0.086657	0.186671	0.116456	0.200886	0.0687111	0.0714881	0.0284077
22.057	0.920263	0.920263	0.954643	0.437415			0.181687	0	0.175744	0.430481	1.28258	0.172572	0.267384	0.383655	0.707293	0.439909	0.291822	0.152823	0.395727	0.327877	0.344811	0.390299	0.336146	0.402314			0.306018	0.715558	0.669366	0.234857	0.400732	1.14429	0.345021	0.0812508	0.478922	0.00414656	0.0898233	0.0936586	0.0567917	0.114247	0.10787	0.147891	0.111653	0.20041	0.107835	0.174903	0.0737302	0.0851222	0.0471541
22.194	0.89566	0.89566	0.85602	0.379861			0.191632	0.0667115	0.143077	0.508385	1.18628	0.137939	0.406214	0.449992	0.563572	0.36077	0.300941	0.15287	0.433081	0.357189	0.330601	0.39358	0.349152	0.505259			0.182639	0.807213	0.759593	0.299826	0.303319	1.17747	0.355958	0.0801965	0.450626	0.0065174	0.0666217	0.124283	0.0992362	0.0893507	0.104838	0.16345	0.119958	0.215172	0.109591	0.176894	0.064562	0.0948993	0.0355698
22.331	0.901632	0.901632	0.860249	0.360578			0.193818	0.0521753	0.241608	0.606089	1.10759	0.169837	0.409315	0.43139	0.425398	0.349613	0.34617	0.169949	0.416585	0.326901	0.317694	0.434629	0.34596	0.44601			0.211289	0.924399	0.547779	0.171093	0.185644	1.10046	0.379312	0.0847712	0.497877	0.0280705	0.0491803	0.162355	0.0949682	0.0522974	0.0982714	0.172225	0.0915004	0.204166	0.104675	0.19442	0.052096	0.0729622
22.468	0.911756	0.911756	0.924351	0.370236			0.255144	0.0728149	0.127317	0.671273	1.07601	0.187542			0.358803	0.445087	0.367759	0.145541	0.383695	0.423032	0.331241	0.377119	0.319847	0.388234			0.143096	0.907708	0.44949	0.198339	0.192304	0.887508	0.401965	0.0925305	0.578018	0.0503603	0.043584	0.0986233	0.0694733	0.059952	0.0789439	0.165935	0.0862098	0.190729	0.105728	0.174318	0.084104	0.0758389
22.605	0.891745	0.891745	0.855924	0.303411			0.276576	0.0506508	0.149233	0.792802	1.11914	0.22318			0.38955	0.500191	0.353905	0.171088	0.409719	0.574778	0.348082	0.428676	0.310108	0.387896			0.132221	1.09618	0.599004	0.217261	0.178169	0.958169	0.418695	0.116664	0.659057	0.0925947	0.0468519	0.0612769	0.082057	0.0613329	0.0622599	0.149757	0.0671258	0.174215	0.141159	0.191033	0.0864811	0.0754933
22.742	0.988847	0.988847	0.839019	0.218674			0.240676	0.0741924	0.0781085	0.735527	1.25393	0.217713			0.382114	0.440975	0.373538	0.205957	0.397084	0.526035	0.331407	0.46778	0.297094	0.391245			0.270788	0.948204	0.493981	0.294014	0.210489	0.9529	0.417138	0.146626	0.737694	0.107074	0.0854114	0.119095	0.103418	0.0382046	0.0698428	0.149663	0.0332838	0.176268	0.138458	0.215263	0.0929768	0.08162
22.879	1.16112	1.16112	0.882095	0.208705			0.217922	0.0718991	0.0883556	0.842393	1.42062	0.218908			0.376815	0.432066	0.296868	0.156839	0.425838	0.566961	0.323932	0.44136	0.28563	0.394264					0.432888	0.224605	0.238808	0.999466	0.395586	0.153605	0.773151	0.107032	0.0969311	0.150138	0.0898302	0.0102793	0.0707626	0.153659	0.0315029	0.170137	0.122271	0.232372	0.100163	0.0877302
23.016	1.24333	1.24333	1.02493	0.222544			0.241604	0.0859064	0.148346	0.809322	1.48456	0.227606			0.322741	0.380082	0.292443	0.142666	0.411879	0.569688	0.270559	0.449455	0.337209	0.388162					0.382333	0.18213	0.161588	1.12386	0.37022	0.140664	0.762091	0.169121	0.0978292	0.151505			0.0751021	0.11651	0.04365	0.175787	0.10119	0.211517	0.0877874	0.0870827
23.153	1.25881	1.25881	1.1638	0.235118			0.247558	0.121405	0.111617	0.805904	1.44224	0.26			0.303168	0.305966	0.348635	0.103363	0.477114	0.52763	0.353811	0.474674	0.251671	0.30349					0.27969	0.265774	0.156704	1.16377	0.371635	0.109421	0.724012	0.234388	0.0986868	0.168463			0.0597831	0.0671655	0.0663627	0.191788	0.0699423	0.197433	0.0820996	0.0797271
23.29	1.19034	1.19034	1.19133	0.200809			0.183138	0.161262	0.0591574	0.923947	1.39689	0.270532			0.295774	0.272954	0.352076	0.0971498	0.472416	0.411949	0.317105	0.407916	0.247806	0.237115					0.326365	0.337024	0.126074	1.18416	0.369897	0.0854392	0.670983	0.260275	0.0894963	0.238748			0.0464509	0.0521329	0.0695525	0.192928	0.0518372	0.201914	0.0885775	0.0782091
23.427	1.13268	1.13268	1.16845	0.150702			0.232851	0.181326			1.37942	0.294506			0.32388	0.253825	0.483162	0.112188			0.274763	0.408818	0.270596	0.183707					0.284811	0.364595	0.164665	1.06912	0.342712	0.110815	0.539266	0.263627	0.102731	0.290459			0.038378	0.0439621	0.0558204	0.188723	0.0556024	0.213804	0.109974	0.0868413
23.564	1.06643	1.06643	1.17437	0.126823			0.236477	0.218274			1.4263	0.2756			0.370847	0.260734	0.561433	0.0361132			0.308263	0.369316	0.265781	0.267595					0.338589	0.567856	0.259705	1.14596	0.277679	0.143871	0.458227	0.272354	0.108776	0.242542			0.0373031	0.0612401	0.0627121	0.164942	0.0731718	0.197404	0.0825994	0.0820497
23.701	0.948451	0.948451	1.15756	0.0590517			0.115173	0.267455			1.51166	0.220673			0.388918	0.244982	0.619178	0.0232745			0.315071	0.378458	0.427412	0.320727					0.233499	0.462155	0.268503	1.21413	0.2833	0.145066	0.445145	0.275683	0.0978705	0.17644			0.0224159	0.0450641	0.0641169	0.166038	0.0881933	0.193743	0.0855219	0.0972914
23.838	0.849157	0.849157	1.1426	0.018036							1.40833	0.218858			0.402821	0.309289	0.511132	0.0449581			0.29301	0.296835							0.276663	0.772979	0.287522	1.38093	0.322279	0.180732	0.491142	0.327211	0.0838594	0.143249			0.0290075	0.0509989	0.0472617	0.132144	0.0921431	0.180338	0.114404	0.116288
23.975	0.871676	0.871676	1.02677	0.0292773							1.11328	0.190858			0.363979	0.288009	0.347112	0.0833862											0.316694	0.940683	0.299186	1.16971	0.295854	0.150832	0.485849	0.370009	0.0880668	0.121996			0.0494564	0.0516383	0.0505676	0.139924	0.0830323	0.217995	0.11309	0.100657
24.112	0.861358	0.861358	0.890439	0.0081397							0.913897	0.254012			0.323353	0.240934	0.250401	0.0731816											0.282933	0.973481	0.383568	1.14296	0.304697	0.119639	0.490816	0.391005	0.0563287	0.129415			0.0456066	0.0377734	0.060441	0.194856	0.10293	0.201705	0.111933	0.0954095
24.249	0.843411	0.843411	0.914798	0							0.725683	0.348426			0.242758	0.187835													0.226889	0.888149	0.373743	1.18278	0.348742	0.142307	0.508138	0.44402	0.0624962	0.100157			0.0594462	0.0609486	0.0488054	0.173081	0.117703	0.166352	0.11353	0.100678
24.386											0.646763	0.375665			0.371939	0.20029													0.146606	0.69926	0.337262	0.825444	0.346058	0.151464	0.476657	0.490696	0.0843494	0.0992925			0.0687121	0.0883436	0.0275684	0.129024	0.0975228	0.147032	0.124081	0.0954918
24.523											0.672185	0.385848			0.355897	0.137783													0.0829936	0.430124	0.318253	0.830029	0.329599	0.135534	0.397906	0.504783	0.0991776	0.159538			0.0694381	0.0926876	0.0472942	0.138739	0.0918932	0.182284	0.130629	0.101198
24.66											0.628783	0.418086			0.275935	0.182521													0.129793	0.479866	0.355312	0.761699	0.441631	0.129302	0.36639	0.500215	0.147336	0.229266			0.0729025	0.114772	0.0674286	0.147687	0.0794338	0.211297	0.109123	0.111302
24.797											0.656707	0.387195			0.341951	0.238216													0.20963	0.511957	0.346167	0.959989			0.392159	0.505401	0.115189	0.299245			0.0745289	0.156799	0.0671278	0.179038	0.0546492	0.148824	0.0845146	0.133565
24.934											0.566273	0.435133			0.507055	0.142586													0.224757	0.465547	0.211067	0.94296			0.424564	0.518564	0.0910484	0.304181			0.0849779	0.186026	0.0791801	0.180871	0.041075	0.145319	0.0595647	0.130661
25.071											0.460346	0.432863			0.455238	0.219076													0.253076	0.501675	0.225361	1.05805			0.406067	0.548681	0.102364	0.327917			0.076051	0.231007	0.0747341	0.143602	0.0661056	0.157047	0.0618106	0.145345
25.208											0.413894	0.44502			0.346832	0.183967													0.331826	0.499935	0.257947	1.09533			0.365317	0.592167	0.131161	0.364371			0.048457	0.280112	0.09795	0.156228	0.0929282	0.152314	0.0957263	0.152327
25.345											0.377959	0.507684			0.362347	0.19467													0.409081	0.541301	0.201878	1.17822			0.382536	0.63893							0.102811	0.186139	0.103123	0.188116	0.0891742	0.136195
25.482											0.394535	0.569404			0.403745	0.150666															0.28037	1.28547			0.42485	0.648558							0.082737	0.161449	0.130992	0.194651	0.0893722	0.141678
25.619											0.352032	0.576989			0.467407	0.210627															0.360798	1.46144			0.383418	0.679958							0.0727034	0.160243	0.108335	0.160161	0.0869853	0.124946
25.756											0.421211	0.705918			0.484424	0.265877															0.286578	1.42606											0.0689047	0.166615	0.0888815	0.174946	0.0869979	0.0874394
25.893											0.355974	0.761544			0.573687	0.246842															0.310316	1.45578											0.0493708	0.136302	0.0750488	0.196102	0.0618985	0.1118
26.03											0.289599	0.808344			0.813362	0.215739															0.364049	1.09609											0.0105518	0.128902	0.075847	0.168289	0.0652766	0.125341
26.167											0.301743	0.883025			0.789782	0.213359																											0.0717697	0.161287	0.0776053	0.160772	0.0714011	0.0997256
26.304											0.308359	0.81353			0.649123	0.192475																											0.0793259	0.168616	0.0999412	0.201812	0.0652204	0.0885769
26.441											0.270601	0.915454			0.335451	0.234062																											0.0651887	0.164258	0.102032	0.18914	0.0545645	0.10878
26.578											0.271558	0.85548			0.451699	0.250842																											0.0730515	0.147535	0.0722913	0.147492
26.715											0.245378	0.733597			0.33049	0.253471																											0.0780916	0.126434	0.0617366	0.169499
26.852											0.200032	0.697928			0.2605	0.171798																											0.0685156	0.121495	0.073682	0.197818
26.989											0.216547	0.750441																															0.0680427	0.160985	0.0778768	0.195925
27.126											0.282229	0.692766																															0.0594039	0.177897	0.0548346	0.17699
27.263											0.266122	0.588126																															0.0584733	0.175738	0.0439966	0.172848
27.4																																											0.0634827	0.155252	0.0640246	0.194455
27.537																																											0.0679848	0.135638	0.0804493	0.198987
27.674																																											0.0733325	0.126183	0.0578367	0.195164
27.811																																											0.050135	0.109767	0.0357368	0.215801
27.948																																											0.038202	0.102418	0.00548805	0.218534
28.085																																											0.0198108	0.127432	0.00798348	0.177693
28.222																																											0.0586604	0.190837	0.0262653	0.200313
28.359																																											0.0619724	0.178005	0.0132632	0.212791
28.496																																											0.0533248	0.195455	0.0425531	0.228673
28.633																																											0.0517425	0.21394	0.0756378	0.251883
28.77																																											0.0477582	0.240076	0.0899854	0.253209
28.907																																											0.0459142	0.220367	0.0764576	0.291859
29.044																																											0.0397948	0.201322	0.0480529	0.334531
29.181																																											0.0451793	0.21591	0.0525825	0.350442
29.318																																											0.0467827	0.226649	0.0426155	0.355855
29.455																																											0.0450911	0.256101	0.038017	0.317816
29.592																																											0.0492273	0.245986	0.0592447	0.295132
29.729																																											0.0496221	0.204376	0.083862	0.335168
29.866																																											0.0523315	0.183147	0.0694988	0.346271
30.003																																											0.0549305	0.155688	0.0694421	0.295158
[truncated: 35 more columns]

## Sheet: TRE-WNT10B
																										Figure 5D - WNT10B-MYC Pixel intensity profile (Normalized Pixel Intensity measured from basal to apical side of progenitor cells )
	Cell 1		Cell 2		Cell 3		Cell 4		Cell 5		Cell 6		Cell 7		Cell 8		Cell 9		Cell 10		Cell 11		Cell 12		Cell 13		Cell 14		Cell 15		Cell 16		Cell 17		Cell 18		Cell 19		Cell 20		Cell 21		Cell 22		Cell 23		Cell 24		Cell 25
	Normalized Pixel Intensity	Normalized Pixel Intensity	Normalized Pixel Intensity	Normalized Pixel Intensity	Normalized Pixel Intensity	Normalized Pixel Intensity	Normalized Pixel Intensity	Normalized Pixel Intensity	Normalized Pixel Intensity	Normalized Pixel Intensity	Normalized Pixel Intensity	Normalized Pixel Intensity	Normalized Pixel Intensity	Normalized Pixel Intensity	Normalized Pixel Intensity	Normalized Pixel Intensity	Normalized Pixel Intensity	Normalized Pixel Intensity	Normalized Pixel Intensity	Normalized Pixel Intensity	Normalized Pixel Intensity	Normalized Pixel Intensity	Normalized Pixel Intensity	Normalized Pixel Intensity	Normalized Pixel Intensity	Normalized Pixel Intensity	Normalized Pixel Intensity	Normalized Pixel Intensity	Normalized Pixel Intensity	Normalized Pixel Intensity	Normalized Pixel Intensity	Normalized Pixel Intensity	Normalized Pixel Intensity	Normalized Pixel Intensity	Normalized Pixel Intensity	Normalized Pixel Intensity	Normalized Pixel Intensity	Normalized Pixel Intensity	Normalized Pixel Intensity	Normalized Pixel Intensity	Normalized Pixel Intensity	Normalized Pixel Intensity	Normalized Pixel Intensity	Normalized Pixel Intensity	Normalized Pixel Intensity	Normalized Pixel Intensity	Normalized Pixel Intensity	Normalized Pixel Intensity	Normalized Pixel Intensity
(basal to apical distance um)	MYC - Tag	DAPI	MYC - Tag	DAPI	MYC - Tag	DAPI	MYC - Tag	DAPI	MYC - Tag	DAPI	MYC - Tag	DAPI	MYC - Tag	DAPI	MYC - Tag	DAPI	MYC - Tag	DAPI	MYC - Tag	DAPI	MYC - Tag	DAPI	MYC - Tag	DAPI	MYC - Tag	DAPI	MYC - Tag	DAPI	MYC - Tag	DAPI	MYC - Tag	DAPI	MYC - Tag	DAPI	MYC - Tag	DAPI	MYC - Tag	DAPI	MYC - Tag	DAPI	MYC - Tag	DAPI	MYC - Tag	DAPI	MYC - Tag	DAPI	MYC - Tag	DAPI	MYC - Tag
0	0.0873496	0.192801	0.0362626	0.45387	0.0401213	0.485268	0	0.107657	0	0.187466	0	0	0.00852028	0.470318	0	0.113319	0	0.249147	0.0432942	0.0231275	0.00939362	0.381938	0.0329912	0.189789	0	0.284995	0	0.569803	0.0256314	0.354611	0.171911	0.0178156	0.00826711	0.0524674	0.12787	0.00746633	0	0.431153	0	0.199697	0.0114573	0.327071	0.0133238	0.144776	0.0194998	0.00735777	0.00880979	0.753272	0
0.137	0.0481653	0.14294	0.0164748	0.489783	0	0.486848	0.00646556	0.0883737	0.056253	0.156939	0.00708454	0.00708454	0	0.464324	0.0028179	0.0447317	0.00746266	0.230856	0.090034	0.0110977	0.0332725	0.334938	0.0259243	0.18539	0.0502797	0.339762	0.00841335	0.58483	0.0374019	0.314126	0.135814	0	0.0161842	0.0362569	0.116321	0.0116758	0.00517525	0.398348	0.00769936	0.158087	0.00985295	0.266837	0.02104	0.120664	0.0522128	0	0.0207182	0.754316	0.00488415
0.274	0.13001	0.196286	0.0584179	0.473532	0.0145125	0.48947	0.00177795	0.0663512	0.12426	0.12873	0.0140999	0.0140999	0.0180476	0.461081	0.0174724	0.0109274	0.0106535	0.217453	0.113516	0.0080419	0.0299017	0.287396	0.0151777	0.176756	0.13988	0.397928	0.0224135	0.571891	0.0519242	0.295169	0.100716	0.00704186	0.0143917	0.0263265	0.116751	0.00712435	0.0176775	0.384975	0.00487504	0.120089	0	0.222704	0.0237307	0.105364	0.128747	0.0210184	0.00829432	0.724987	0.0202899
0.411	0.0717416	0.133175	0.0222641	0.507757	0.0392067	0.530801	0.0169357	0.0428491	0.195163	0.103294	0.0171419	0.0171419	0.0102022	0.453856	0.0719771	0	0.0680768	0.192311	0.168513	0	0.0375627	0.257083	0.0120459	0.172511	0.312503	0.45466	0.0393777	0.534016	0.0533586	0.261934	0.0722341	0.0244261	0	0.0151602	0.105124	0	0.015024	0.323861	0.0114117	0.0908714	0.00238125	0.175431	0.0230467	0.0836144	0.323727	0.0549898	0	0.679729	0.0318851
0.548	0.110444	0.142711	0	0.514676	0.0490992	0.512728	0.0550293	0.0264929	0.264755	0.075226	0.0172332	0.0172332	0.0123948	0.432464	0.177855	0.000202766	0.0963445	0.15667	0.266053	0.00126184	0.0140688	0.22339	0	0.172631	0.476653	0.507122	0.0785314	0.490971	0.0480176	0.2463	0.047175	0.0294971	0.0051216	0.0157376	0.0895676	0.0217237	0.0184344	0.271422	0.0315527	0.0934966	0.00728503	0.157527	0.0281682	0.0464866	0.62462	0.0941178	0.00615045	0.623254	0.0345218
0.685	0.115469	0.0882899	0.0834846	0.51223	0.0824384	0.520504	0.121239	0.0177887	0.320027	0.0494342	0.0300023	0.0300023	0.0425407	0.413203	0.369743	0.00530868	0.118658	0.122551	0.287742	0.00941627	0	0.187525	0.00852543	0.173628	0.582625	0.556136	0.132877	0.432118	0.0446045	0.236285	0.0507736	0.0318057	0.0036278	0.0155782	0.0876189	0.0422462	0.0313917	0.231777	0.0827384	0.109161	0.0338673	0.127616	0.0364158	0.0113548	0.902782	0.118457	0.0108482	0.554019	0.0326384
0.822	0.197581	0.068736	0.100597	0.517884	0.100441	0.5116	0.230815	0.0120376	0.36261	0.0304534	0.0569689	0.0569689	0.0752363	0.403307	0.595064	0.0134446	0.187587	0.100546	0.409555	0.0113244	0.00387374	0.162987	0.000366486	0.173358	0.623181	0.584216	0.202689	0.378015	0.0697426	0.245557	0.0722492	0.0395159	0.00127186	0.0240624	0.0946315	0.0631107	0.033216	0.175907	0.206294	0.114522	0.112373	0.0917127	0.0637869	0.00163309	1.08787	0.137372	0.0161552	0.48361	0.0243768
0.959	0.238209	0.0588103	0.0579376	0.543814	0.148206	0.489337	0.387813	0.00538119	0.386227	0.0160882	0.095053	0.095053	0.0947086	0.399019	0.780588	0.0224752	0.257443	0.0609486	0.557549	0.0373064	0.0163318	0.135317	0.0188019	0.164086	0.579083	0.603586	0.286675	0.336411	0.0846921	0.251788	0.159125	0.041687	0.00574899	0.0197171	0.118759	0.080717	0.060334	0.133699	0.432785	0.119129	0.304125	0.0475388	0.140027	0	1.0776	0.162292	0.0377169	0.401761	0.0242073
1.096	0.248152	0.0310619	0.0535816	0.580318	0.205412	0.41985	0.555556	0	0.391421	0.00615894	0.136167	0.136167	0.0992152	0.398879	0.92261	0.022006	0.285377	0.0305506	0.707851	0.0538695	0.0072171	0.11412	0.0211377	0.146712	0.510753	0.616181	0.419786	0.303968	0.138778	0.239416	0.275984	0.0521467	0.0101023	0.0309657	0.19114	0.0948687	0.114068	0.105757	0.76957	0.122898	0.596353	0.0263727	0.301349	0.00643099	0.936487	0.192459	0.107363	0.336099	0.0334797
1.233	0.514641	0.0397789	0.0775491	0.619382	0.29052	0.38162	0.686629	0.00107228	0.423457	0.0013002	0.180841	0.180841	0.117877	0.374603	1.08106	0.0156514	0.343878	0.0264002	0.897844	0.0958921	0.0213802	0.0941973	0.031044	0.143772	0.482584	0.610536	0.58103	0.282756	0.240256	0.213397	0.407096	0.0679381	0.0523342	0.045338	0.306953	0.121769	0.24245	0.0853862	1.26668	0.126392	0.934658	0.00557177	0.521477	0.0269876	0.730779	0.203834	0.241221	0.272396	0.0377298
1.37	0.641069	0	0.114348	0.636325	0.296098	0.288881	0.782072	0.0110728	0.507043	0	0.265777	0.265777	0.195595	0.304349	1.25809	0.0193179	0.463099	0.030089	1.03875	0.152549	0.0293909	0.0720235	0.0625063	0.145021	0.460676	0.600107	0.726731	0.279632	0.377055	0.175334	0.554512	0.0917266	0.112573	0.0313589	0.478919	0.124682	0.478875	0.0662108	1.80046	0.106821	1.26474	0.00415163	0.777031	0.0583922	0.602153	0.214276	0.450875	0.204385	0.0341388
1.507	0.764609	0.0249724	0.181816	0.581988	0.369202	0.265135	0.839429	0.0322835	0.608836	0.00245235	0.397146	0.397146	0.324645	0.229289	1.38212	0.0430536	0.599159	0.0145752	1.10613	0.230085	0.0198873	0.0636855	0.14628	0.140607	0.442484	0.586919	0.794318	0.270172	0.568658	0.139024	0.727654	0.0971816	0.229627	0.0376417	0.626908	0.125886	0.845492	0.0502959	2.27852	0.0866248	1.57763	0	1.02662	0.0914561	0.584711	0.230623	0.662913	0.14011	0.0259274
1.644	0.903546	0.0264557	0.17032	0.486642	0.482216	0.26585	0.850304	0.0665684	0.703738	0.0102426	0.54869	0.54869	0.453967	0.157388	1.40496	0.0827552	0.690181	0.0161819	1.1525	0.303071	0.0274108	0.0490641	0.237801	0.14198	0.440789	0.57597	0.797302	0.247738	0.779427	0.108427	0.906218	0.124932	0.367756	0.0279321	0.76342	0.153811	1.3439	0.049167	2.68987	0.0620541	1.6917	0.00472474	1.17838	0.134601	0.590089	0.242104	0.825695	0.089871	0.0395001
1.781	0.843248	0.0677332	0.123552	0.353133	0.635684	0.246612	0.809632	0.115922	0.790167	0.0261441	0.686807	0.686807	0.579215	0.105328	1.34639	0.142765	0.837382	0.00344174	1.16715	0.399872	0.0362348	0.0425103	0.377133	0.136932	0.433578	0.561578	0.808507	0.219009	0.9687	0.0756245	1.06297	0.136566	0.565825	0.0137701	0.898498	0.192892	1.85769	0.0387702	2.92092	0.0380257	1.54081	0.0108696	1.23612	0.180635	0.613238	0.249845	0.968128	0.0586727	0.0879022
1.918	0.954441	0.0846827	0.151658	0.21698	0.732285	0.256731	0.732618	0.182878	0.8649	0.0436416	0.793412	0.793412	0.723956	0.0700174	1.27707	0.251626	0.938933	0.00571426	1.1034	0.489026	0.0248257	0.038719	0.538109	0.136418	0.468086	0.543856	0.871968	0.174953	1.14155	0.0405745	1.14346	0.143435	0.792981	0	0.916023	0.238357	2.23329	0.0310796	2.839	0.018283	1.36277	0.0164628	1.17562	0.226543	0.625547	0.247843	1.10285	0.029887	0.166658
2.055	0.842766	0.116969	0.249895	0.0996708	0.67062	0.248677	0.649426	0.262873	0.905955	0.0564672	0.870118	0.870118	0.822107	0.0397797	1.20452	0.416973	1.06945	0.00617587	1.0462	0.553527	0.043554	0.0320983	0.680087	0.137327	0.474975	0.517187	0.89676	0.134021	1.28333	0.0243746	1.18967	0.159447	0.980598	0.00876111	0.932524	0.265677	2.63292	0.0400969	2.60758	0.00410771	1.13759	0.0287991	1.08478	0.234386	0.576274	0.248301	1.17509	0.00909329	0.28077
2.192	0.881095	0.148324	0.286919	0.0316655	0.6529	0.250185	0.56758	0.343943	0.88201	0.0707407	0.943213	0.943213	0.862137	0.0227213	1.15195	0.572875	1.09258	0	1.05275	0.600517	0.0463434	0.0257828	0.80681	0.126763	0.547993	0.486434	0.907409	0.0982295	1.41897	0.00206944	1.11935	0.178731	1.0848	0.0265224	0.921914	0.275354	2.96032	0.0211858	2.28006	0	0.953158	0.0510299	0.965023	0.227215	0.511641	0.251158	1.21054	0	0.417865
2.329	0.926588	0.137628	0.278323	0	0.610754	0.253655	0.538802	0.423026	0.786561	0.0978539	0.999244	0.999244	0.846918	0.0129214	1.10433	0.667767	1.2505	0.00303577	1.10463	0.630029	0.0422968	0.029845	0.94911	0.110688	0.617758	0.464239	0.873725	0.0662181	1.51611	0	1.05698	0.209209	1.22918	0.0464877	0.914511	0.249508	3.11522	0.00934468	1.95	0.00902617	0.842172	0.0815231	0.877302	0.212128	0.475488	0.265822	1.19183	0.000110646	0.544401
2.466	0.919263	0.169861	0.25583	0.0278356	0.627523	0.27478	0.560914	0.486294	0.652407	0.136358	1.0393	1.0393	0.840108	0.000942863	1.054	0.721378	1.24813	0.0291566	1.31757	0.634926	0.0359637	0.0292437	1.04981	0.106864	0.58755	0.448156	0.819242	0.0369386	1.60316	0.00167544	1.0563	0.229529	1.32769	0.0731578	0.887314	0.254243	3.12374	0.00674079	1.68805	0.0247083	0.765251	0.0976517	0.828241	0.218296	0.498529	0.292932	1.10622	0.000731279	0.630545
2.603	0.747236	0.20077	0.24522	0.0666624	0.699824	0.295898	0.582688	0.526139	0.514696	0.173245	1.11455	1.11455	0.852063	0	0.959592	0.757366	1.34204	0.0480005	1.46498	0.666505	0.0795885	0.0238936	1.1745	0.105745	0.57344	0.430505	0.808629	0.0200462	1.58011	0.00085149	1.12727	0.250025	1.39943	0.116642	0.854577	0.285874	3.08545	0.00641339	1.481	0.0475631	0.754121	0.111694	0.75979	0.204254	0.566598	0.347212	0.988618	0.00858458	0.679682
2.74	0.807325	0.201159	0.215189	0.100126	0.511463	0.331647	0.578221	0.555759	0.408369	0.196923	1.19383	1.19383	0.849203	0.0106079	0.820694	0.789842	1.44078	0.0640967	1.44209	0.667838	0.170008	0.0198472	1.30572	0.0870532	0.597665	0.417784	0.803302	0.00183214	1.49555	0.0109017	1.30454	0.289707	1.51817	0.133959	0.799141	0.334796	3.01913	0	1.28827	0.0801604	0.771703	0.131564	0.660537	0.196364	0.619418	0.411872	0.845986	0.0304975	0.672312
2.877	0.63059	0.219135	0.350275	0.127568	0.593121	0.375531	0.562059	0.584967	0.322101	0.205415	1.18368	1.18368	0.852574	0.0295193	0.772034	0.845505	1.48252	0.100287	1.43779	0.653841	0.321348	0.0230248	1.46567	0.0789049	0.606867	0.393355	0.834195	0	1.37546	0.0246501	1.43987	0.330985	1.56819	0.12266	0.691866	0.36316	2.84235	0.0119111	1.1192	0.118966	0.733921	0.1649	0.543122	0.201301	0.660068	0.508059	0.666457	0.0530781	0.685495
3.014	0.739754	0.207215	0.425745	0.139946	0.655459	0.397271	0.575609	0.618592	0.255136	0.211662	1.08238	1.08238	0.888248	0.0589895	0.691189	0.894607	1.33268	0.1341	1.46291	0.627766	0.506505	0.0197937	1.44481	0.0728485	0.582447	0.387369	0.867375	0.015882	1.24019	0.0371745	1.45122	0.352126	1.4956	0.101895	0.632089	0.399469	2.71565	0.0260867	1.00613	0.151501	0.633	0.194917	0.48293	0.234906	0.635329	0.565388	0.530755	0.0765808	0.694127
3.151	0.569382	0.20805	0.429486	0.177156	0.687483	0.404245	0.584446	0.648048	0.242669	0.222151	0.993434	0.993434	0.976804	0.0945934	0.566219	0.94551	1.12656	0.14227	1.48916	0.59923	0.691144	0.00766782	1.3298	0.0558966	0.531697	0.375522	0.890247	0.0317397	1.15849	0.0665659	1.40588	0.372644	1.32503	0.0761065	0.525133	0.417684	2.56132	0.0425098	0.920491	0.178422	0.556134	0.234677	0.483105	0.266322	0.606029	0.609951	0.473345	0.0936113	0.692828
3.288	0.554787	0.222422	0.577939	0.153388	0.624894	0.413957	0.555737	0.670536	0.281593	0.228268	0.954396	0.954396	1.11891	0.139881	0.451736	0.982754	0.989796	0.14585	1.4387	0.597407	0.962778	0.0133488	1.233	0.0398414	0.491391	0.371963	0.943548	0.0568222	1.06275	0.1155	1.22834	0.387988	1.15924	0.0771412	0.450145	0.409437	2.37029	0.0756135	0.857353	0.203166	0.479449	0.25228	0.493659	0.313373	0.556816	0.665188	0.422442	0.11452	0.714392
3.425	0.525117	0.267352	0.640026	0.147189	0.398446	0.458124	0.518631	0.683396	0.321117	0.224322	0.887612	0.887612	1.27069	0.225728	0.408028	0.995415	0.949882	0.156347	1.40262	0.604026	1.20717	0.010725	1.11753	0.0351392	0.504623	0.367712	1.03583	0.0741159	1.02238	0.167493	1.14552	0.410106	0.966569	0.101645	0.424812	0.420212	2.19199	0.131671	0.819877	0.236835	0.400868	0.273615	0.487644	0.348031	0.527654	0.710567	0.372682	0.138215	0.706174
3.562	0.519612	0.313678	0.892675	0.182528	0.389794	0.442889	0.495066	0.688133	0.331781	0.214664	0.792877	0.792877	1.31476	0.341769	0.416373	0.971544	0.938503	0.16684	1.3212	0.614638	1.39295	0.00027194	1.0715	0.0289125	0.533032	0.353967	1.12548	0.0721246	1.03057	0.197504	1.08206	0.430259	0.814581	0.129688	0.35681	0.395354	1.98216	0.18937	0.739642	0.272508	0.318175	0.307695	0.451822	0.397206	0.473953	0.750174	0.337982	0.164919	0.673611
3.699	0.508384	0.334216	0.962011	0.232705	0.462021	0.440013	0.497999	0.686786	0.323414	0.200288	0.743524	0.743524	1.20403	0.458724	0.374749	0.95936	0.919207	0.175283	1.13473	0.641979	1.58061	0	1.05646	0.0101029	0.548175	0.340745	1.17573	0.0723443	1.02854	0.226618	1.04249	0.447395	0.709307	0.167093	0.335153	0.348944	1.77036	0.228269	0.645007	0.301339	0.279389	0.318962	0.394299	0.450317	0.386162	0.763814	0.308758	0.197665	0.631035
3.836	0.620863	0.451135	1.02013	0.307749	0.538777	0.455725	0.505111	0.680939	0.314286	0.183819	0.7211	0.7211	1.02975	0.548728	0.337458	0.949785	0.796219	0.191045	0.828203	0.686344	1.64541	0.013229	1.08757	0.00339074	0.553323	0.33571	1.141	0.0776019	1.02075	0.225195	1.01943	0.440404	0.651698	0.188009	0.330858	0.309748	1.62381	0.248359	0.514676	0.343259	0.234508	0.302039	0.334254	0.470903	0.319795	0.760374	0.279969	0.227409	0.578816
3.973	0.644863	0.649362	1.02065	0.374111	0.58682	0.45241	0.477518	0.686104	0.299031	0.170547	0.674837	0.674837	0.837505	0.577064	0.336468	0.922597	0.69563	0.227441	0.614891	0.698811	1.58544	0.0171595	1.07222	0.0028907	0.548491	0.327973	1.06333	0.0743183	0.886724	0.207044	1.01954	0.410165	0.641629	0.216752	0.313157	0.273552	1.51544	0.30508	0.421272	0.37511	0.223803	0.30432	0.304757	0.459532	0.263869	0.75058	0.255601	0.269777	0.530326
4.11	0.602685	0.779997	1.10962	0.449799	0.514557	0.444957	0.405332	0.712453	0.292909	0.160533	0.613671	0.613671	0.666642	0.590566	0.245816	0.892507	0.601969	0.254477	0.501331	0.692604	1.4578	0.0156527	0.944642	0.00273923	0.576488	0.320281	0.971044	0.0540437	0.764518	0.200784	1.02721	0.396058	0.633789	0.226894	0.293306	0.255656	1.33571	0.33366	0.371657	0.406661	0.231431	0.313031	0.29093	0.449769	0.212082	0.740117	0.233073	0.31644	0.468973
4.247	0.620541	0.913324	1.09635	0.499187	0.588064	0.454977	0.324765	0.752145	0.318714	0.160078	0.562164	0.562164	0.608886	0.603323	0.219635	0.885588	0.521228	0.260129	0.439642	0.679567	1.2938	0.0308075	0.851929	0.00802121	0.638252	0.316144	0.878462	0.0416564	0.701744	0.219628	1.00218	0.384838	0.634608	0.209412	0.283823	0.232139	1.13707	0.337549	0.345222	0.460444	0.217648	0.32114	0.276962	0.425549	0.183732	0.773916	0.230864	0.379268	0.390883
4.384	0.468826	1.0018	1.05919	0.523161	0.539436	0.450218	0.285617	0.790442	0.348344	0.170751	0.517675	0.517675	0.613885	0.601401	0.210508	0.907228	0.411999	0.293377	0.425823	0.67764	1.12544	0.0477941	0.777402	0.00696396	0.722196	0.320514	0.799706	0.0440456	0.642053	0.234626	0.95871	0.387716	0.610558	0.202757	0.284709	0.211134	0.934292	0.367952	0.326042	0.477615	0.195364	0.349007	0.299675	0.407356	0.175007	0.831707	0.26007	0.471289	0.338651
4.521	0.393824	1.01081	0.930015	0.529376	0.537949	0.436571	0.302746	0.810868	0.353757	0.191832	0.467834	0.467834	0.632789	0.595187	0.20263	0.948182	0.303928	0.306257	0.406272	0.708232	1.00852	0.0678206	0.705249	0	0.776817	0.32074	0.733011	0.0619691	0.556537	0.250351	0.965081	0.39224	0.600785	0.192488	0.266004	0.211113	0.831804	0.3901	0.288914	0.475055	0.192488	0.40156	0.309121	0.390671	0.17714	0.882604	0.238432	0.559573	0.291674
4.658	0.374952	1.00372	0.846098	0.518665	0.572109	0.494156	0.3244	0.807394	0.328224	0.227098	0.433802	0.433802	0.592552	0.574682	0.20529	1.0159	0.27119	0.327936	0.618476	0.716305	0.874059	0.0971802	0.637231	0.000757958	0.899748	0.324585	0.677682	0.0792247	0.478777	0.257732	0.935929	0.386728	0.577584	0.190094	0.256724	0.2138	0.744143	0.384585	0.284922	0.488165	0.21676	0.466251	0.287991	0.340524	0.19001	0.918517	0.208489	0.635911	0.262281
4.795	0.33208	0.988402	0.821775	0.531267	0.675388	0.573719	0.32005	0.786069	0.286731	0.28111	0.407512	0.407512	0.508835	0.539768	0.183387	1.0938	0.293738	0.361491	0.629159	0.735556	0.745982	0.113884	0.590183	0.0108219	1.0493	0.331488	0.610391	0.107041	0.449585	0.286384	0.86308	0.402167	0.528809	0.204926	0.219536	0.234661	0.728103	0.380603	0.26523	0.48046	0.219978	0.562014	0.287804	0.294155	0.188484	0.950574	0.179704	0.693898	0.265056
4.932	0.332186	0.975369	0.69506	0.546957	0.597879	0.649075	0.315001	0.763847	0.236822	0.357608	0.396885	0.396885	0.435255	0.520018	0.163043	1.18139	0.296413	0.405143	0.579364	0.737489	0.641045	0.135197	0.524619	0.0126432	1.17792	0.345221	0.577496	0.140623	0.458746	0.327075	0.802866	0.418731	0.471827	0.228756	0.191466	0.263137	0.732896	0.380265	0.279077	0.452819	0.233358	0.661358	0.29067	0.242495	0.182351	0.929407	0.158412	0.72616	0.273243
5.069	0.280226	1.00032	0.620366	0.629252	0.550888	0.668146	0.308834	0.752225	0.190188	0.450539	0.399342	0.399342	0.34616	0.502589	0.152977	1.27134	0.309678	0.430168	0.471959	0.769106	0.554754	0.17013	0.470572	0.0180864	1.22362	0.355698	0.53738	0.180452	0.482887	0.370398	0.739518	0.417497	0.405626	0.270828	0.187386	0.306346	0.700951	0.365002	0.297611	0.419391	0.23979	0.737599	0.286476	0.214381	0.1677	0.908498	0.153861	0.728111	0.26763
5.206	0.243981	1.02955	0.573936	0.671596	0.574829	0.704107	0.274574	0.754209	0.170072	0.538946	0.397923	0.397923	0.303113	0.492841	0.147449	1.33218	0.307908	0.444606	0.398556	0.78441	0.469614	0.186702	0.464549	0.0214795	1.27416	0.369246	0.496984	0.214247	0.474093	0.429199	0.731993	0.434604	0.364022	0.325709	0.189889	0.352606	0.679676	0.355906	0.300554	0.374804	0.22131	0.77379	0.290942	0.20001	0.139155	0.878	0.149725	0.705798	0.26414
5.343	0.20699	1.08299	0.507297	0.714673	0.599618	0.702782	0.230775	0.770994	0.184175	0.611477	0.399622	0.399622	0.313436	0.506133	0.143486	1.38042	0.283115	0.459195	0.352866	0.800186	0.406696	0.211572	0.493598	0.0266155	1.19348	0.380921	0.463351	0.249643	0.45102	0.489937	0.684889	0.444154	0.307829	0.378732	0.200101	0.403503	0.668279	0.350064	0.29795	0.30435	0.192927	0.79571	0.288477	0.184936	0.0981852	0.824803	0.147166	0.659803	0.265741
5.48	0.23746	1.16311	0.500885	0.711511	0.579799	0.684337	0.189326	0.80984	0.210199	0.667289	0.419967	0.419967	0.245738	0.524441	0.105828	1.42655	0.304717	0.483492	0.314854	0.812363	0.375572	0.238069	0.542766	0.0288967	1.09027	0.395979	0.433109	0.279991	0.430633	0.541683	0.603522	0.423653	0.287433	0.390263	0.192887	0.434139	0.658728	0.329327	0.333755	0.25769	0.203057	0.784536	0.307589	0.174773	0.0687871	0.792862	0.162307	0.610399	0.250536
5.617	0.322192	1.23792	0.394574	0.677724	0.547768	0.684352	0.156466	0.875341	0.226543	0.702633	0.433755	0.433755	0.245592	0.5411	0.122361	1.4531	0.340616	0.511653	0.276202	0.811389	0.359539	0.26523	0.615786	0.0305574	0.99358	0.410992	0.392693	0.305923	0.39056	0.581095	0.507811	0.400798	0.287915	0.395894	0.160333	0.459289	0.626818	0.317462	0.359673	0.213397	0.201554	0.765984	0.325226	0.180261	0.0374604	0.796126	0.178433	0.572306	0.222637
5.754	0.151605	1.21416	0.335207	0.631069	0.47926	0.689577	0.156985	0.93218	0.221734	0.713386	0.425072	0.425072	0.254366	0.550261	0.135817	1.45514	0.329769	0.543501	0.316507	0.786015	0.336214	0.294498	0.651538	0.0310538	0.88201	0.434001	0.377419	0.335255	0.331159	0.610967	0.375706	0.375379	0.255051	0.43136	0.154728	0.482216	0.595711	0.308097	0.363706	0.195764	0.206907	0.693866	0.307301	0.184352	0.037479	0.810687	0.190119	0.546003	0.192516
5.891	0.101408	1.22656	0.39355	0.557617	0.389939	0.682995	0.179261	0.964874	0.196148	0.706537	0.411281	0.411281	0.243753	0.575532	0.127889	1.40891	0.386658	0.581325	0.348986	0.786396	0.277955	0.328097	0.649206	0.0311602	0.807553	0.46132	0.366943	0.371069	0.288304	0.615194	0.295292	0.358747	0.242836	0.496639	0.140944	0.509674	0.558791	0.312658	0.352669	0.18486	0.200545	0.650731	0.325209	0.191717	0.0433113	0.82371	0.191484	0.539333	0.179339
6.028	0.287709	1.18668	0.369957	0.519773	0.357699	0.692828	0.202535	0.977275	0.175594	0.686059	0.386771	0.386771	0.303977	0.590409	0.121004	1.3491	0.412512	0.608283	0.369865	0.778247	0.257914	0.377872	0.623241	0.0408798	0.706318	0.497006	0.344479	0.393285	0.242993	0.617233	0.261408	0.335934	0.24439	0.553402	0.114529	0.510669	0.532239	0.31975	0.317638	0.190383	0.192468	0.565659	0.333841	0.205875	0.0559542	0.821557	0.158658	0.552663	0.185428
6.165	0.202125	1.16825	0.345056	0.50885	0.3993	0.696031	0.212125	0.973975	0.169415	0.64636	0.363281	0.363281	0.25068	0.644456	0.137696	1.28966	0.382645	0.629505	0.29192	0.797124	0.261454	0.422005	0.576709	0.0442383	0.563541	0.51378	0.309878	0.420083	0.213968	0.615264	0.249458	0.338794	0.23465	0.61812	0.109928	0.489943	0.518775	0.300909	0.283499	0.19013	0.201695	0.483957	0.336328	0.222906	0.0693806	0.839599	0.142936	0.571934	0.173143
6.302	0.206562	1.1335	0.343919	0.521615	0.402121	0.609835	0.212691	0.955471	0.167227	0.60004	0.354306	0.354306	0.21445	0.705441	0.164349	1.20818	0.306529	0.670924	0.260987	0.821398	0.269524	0.458396	0.558947	0.0497709	0.434463	0.537803	0.287816	0.445204	0.198312	0.603575	0.2403	0.334338	0.224966	0.63681	0.11842	0.442186	0.497951	0.285405	0.301003	0.199248	0.213183	0.432164	0.325102	0.239828	0.0855377	0.833366	0.154113	0.594523	0.149111
6.439	0.0897035	1.07595	0.335743	0.528557	0.437451	0.594254	0.204625	0.92666	0.16395	0.5539	0.356914	0.356914	0.216539	0.759965	0.16341	1.14117	0.313912	0.709715	0.278764	0.803648	0.244022	0.505172	0.521217	0.0555882	0.322069	0.567258	0.285988	0.473549	0.19236	0.61586	0.261453	0.326842	0.210527	0.628915	0.123125	0.396193	0.478462	0.27368	0.305809	0.236767	0.249674	0.405762	0.26863	0.245285	0.0622037	0.823035	0.152806	0.59838	0.132682
6.576	0.136103	1.0198	0.3793	0.508233	0.412757	0.572349	0.184639	0.896401	0.15564	0.511079	0.345352	0.345352	0.192131	0.775453	0.162416	1.09809	0.294381	0.697076	0.275539	0.818089	0.218324	0.536567	0.497448	0.0495617	0.246971	0.593688	0.27211	0.492331	0.164766	0.646116	0.25041	0.350358	0.196746	0.602534	0.137359	0.375049	0.46715	0.257212	0.276495	0.267108	0.258159	0.385791	0.22495	0.260777	0.0660611	0.795472	0.166033	0.596277	0.123353
6.713	0.0389175	0.978286	0.301349	0.518479	0.397293	0.600049	0.151012	0.884159	0.148533	0.476563	0.340951	0.340951	0.200401	0.800628	0.192514	1.06277	0.230799	0.720492	0.245239	0.8254	0.216061	0.558392	0.526196	0.0514474	0.214439	0.60832	0.255543	0.491479	0.145864	0.67189	0.24476	0.380757	0.18442	0.522339	0.147617	0.348398	0.477637	0.255548	0.271052	0.282973	0.249013	0.365221	0.196347	0.29296	0.0963585	0.785899	0.172921	0.605798	0.119837
6.85	0.0902372	0.927383	0.32732	0.539874	0.357921	0.628934	0.120699	0.898534	0.140932	0.447921	0.344006	0.344006	0.223895	0.78462	0.202475	1.05549	0.153453	0.739474	0.228265	0.804002	0.206954	0.561291	0.54793	0.0510088	0.224997	0.621944	0.230405	0.475892	0.141749	0.70881	0.259311	0.417925	0.214889	0.475637	0.162346	0.334346	0.504113	0.264526	0.277278	0.28393	0.275131	0.362973	0.16646	0.321421	0.0967665	0.764767	0.169038	0.634114	0.107721
6.987	0.220514	0.949363	0.353456	0.538638	0.359791	0.62745	0.111964	0.924425	0.168925	0.432975	0.354199	0.354199	0.244663	0.791456	0.179943	1.08792	0.147924	0.706021	0.265607	0.793261	0.196543	0.59199	0.544447	0.0554952	0.214597	0.61291	0.205582	0.463946	0.169649	0.785561	0.257028	0.470233	0.233933	0.446003	0.181898	0.324688	0.493346	0.27761	0.289408	0.292946	0.253034	0.383933	0.144453	0.34395	0.0947962	0.716949	0.160433	0.666168	0.11177
7.124	0.147435	0.836676	0.263578	0.524349	0.319643	0.612274	0.122561	0.939444	0.201614	0.435219	0.371938	0.371938	0.267378	0.803923	0.190426	1.14901	0.187466	0.673616	0.255005	0.806876	0.194292	0.593972	0.528414	0.0565177	0.202976	0.609781	0.199527	0.436552	0.188245	0.799572	0.252497	0.500999	0.232341	0.414547	0.175622	0.314846	0.476366	0.30501	0.29676	0.294036	0.246863	0.407889	0.130609	0.364737	0.0746241	0.692388	0.169946	0.697743	0.134772
7.261	0.222598	0.857016	0.226318	0.503331	0.238916	0.662407	0.130333	0.934145	0.200848	0.453065	0.40928	0.40928	0.254069	0.811313	0.23236	1.22033	0.188489	0.662439	0.263126	0.768785	0.16703	0.594262	0.497555	0.0495757	0.208007	0.587599	0.2082	0.407009	0.17884	0.816671	0.25979	0.519957	0.233502	0.402869	0.17907	0.308847	0.432812	0.316449	0.306304	0.287724	0.270943	0.438849	0.1404	0.380104	0.0531307	0.688387	0.180817	0.732582	0.146675
7.398	0.152033	0.875555	0.250394	0.495302	0.305359	0.666377	0.126914	0.917653	0.190407	0.48423	0.436869	0.436869	0.226723	0.810477	0.244409	1.29293	0.181454	0.672672	0.316135	0.746685	0.162956	0.60376	0.474385	0.0422826	0.217841	0.572292	0.214795	0.3907	0.175427	0.826506	0.260304	0.491776	0.249691	0.426089	0.166641	0.289953	0.431336	0.35009	0.311504	0.291102	0.29073	0.453299	0.125522	0.38703	0.0368206	0.663159	0.189	0.751929	0.152036
7.535	0.10745	0.879361	0.2376	0.472098	0.312837	0.673743	0.119551	0.898531	0.169144	0.524962	0.421584	0.421584	0.197323	0.827085	0.230118	1.34088	0.216977	0.693428	0.309362	0.73947	0.13828	0.621053	0.472856	0.0400787	0.22797	0.565174	0.218248	0.382159	0.186852	0.834331	0.26545	0.460045	0.240613	0.445919	0.16992	0.274074	0.43265	0.369606	0.295995	0.296806	0.292319	0.468258	0.137449	0.394359	0.0209788	0.649309	0.196305	0.75733	0.154265
7.672	0.0745197	0.852935	0.201694	0.468157	0.331388	0.689774	0.127135	0.868814	0.140057	0.56675	0.379885	0.379885	0.182547	0.852818	0.200233	1.35507	0.267991	0.700267	0.292137	0.71722	0.146577	0.625808	0.460022	0.0398451	0.216952	0.576205	0.216934	0.375155	0.201354	0.820963	0.256897	0.44901	0.23981	0.498567	0.140038	0.270929	0.416321	0.411224	0.287888	0.308665	0.269859	0.479197	0.159168	0.406637	0.0131343	0.633236	0.198671	0.763404	0.143072
7.809	0.201108	0.865992	0.157649	0.462616	0.297699	0.762042	0.116317	0.840347	0.102008	0.595558	0.347677	0.347677	0.144552	0.905578	0.191679	1.32721	0.263353	0.711539	0.261812	0.720437	0.156666	0.615978	0.441205	0.0302769	0.197175	0.587764	0.206112	0.367929	0.220657	0.805624	0.285892	0.414948	0.237279	0.55189	0.139217	0.284992	0.400935	0.446529	0.275662	0.322665	0.248362	0.485284	0.161615	0.413961	0.000746426	0.584258	0.176254	0.748969	0.119794
7.946	0	0.904665	0.166418	0.434256	0.318039	0.801475	0.169618	0.827934	0.0540124	0.610561	0.338749	0.338749	0.160221	0.960642	0.231003	1.27257	0.255093	0.70771	0.234685	0.708299	0.137093	0.601245	0.440457	0.037362	0.168206	0.599629	0.198956	0.363313	0.224142	0.787409	0.281664	0.381367	0.218637	0.586689	0.132093	0.298821	0.393859	0.460115	0.261371	0.326425	0.252408	0.494491	0.168478	0.422765	0	0.542476	0.147394	0.710654	0.10526
8.083	0.0538857	0.926976	0.108341	0.491557	0.279498	0.808016	0.211157	0.8249	0.0468492	0.619278	0.344544	0.344544	0.177594	1.00527	0.231943	1.21152	0.206729	0.697228	0.275852	0.713077	0.144841	0.574732	0.368804	0.0342821	0.152723	0.614434	0.185898	0.379375	0.202554	0.756272	0.269477	0.347371	0.22862	0.61563	0.135436	0.334398	0.374374	0.459305	0.261842	0.342758	0.238902	0.492319	0.158388	0.441166	0.00802061	0.505895	0.146925	0.668824	0.109058
8.22	0.110231	0.884493	0.213797	0.533892	0.190973	0.804722	0.207903	0.830903	0.0801981	0.628844	0.360682	0.360682	0.181604	1.01989	0.191679	1.11789	0.225868	0.725517	0.30723	0.72302	0.150314	0.54387	0.309337	0.0319881	0.179794	0.621606	0.160511	0.382643	0.175687	0.741973	0.271316	0.311293	0.259084	0.642622	0.155464	0.389653	0.393608	0.493365	0.261458	0.371875	0.230407	0.485138	0.163622	0.453449	0.0207377	0.503966	0.140798	0.630269	0.116768
8.357	0.120974	0.790129	0.25182	0.519884	0.237856	0.846795	0.19539	0.85671	0.130876	0.64637	0.379731	0.379731	0.198802	1.00822	0.179004	1.02666	0.25255	0.760668	0.340287	0.745666	0.117949	0.532098	0.284949	0.0304892	0.165114	0.644979	0.163454	0.390101	0.167914	0.701268	0.282258	0.299945	0.271385	0.637504	0.150733	0.410204	0.37107	0.510196	0.250467	0.405415	0.201811	0.511091	0.162198	0.456988	0.023167	0.528386	0.140576	0.59976	0.108349
8.494	0.122206	0.821759	0.348121	0.501984	0.262921	0.815421	0.196421	0.893597	0.183357	0.656644	0.381064	0.381064	0.223131	0.985031	0.163878	0.969954	0.259235	0.748458	0.390929	0.762251	0.119662	0.531659	0.2715	0.0248605	0.17075	0.660217	0.171501	0.401679	0.152924	0.665872	0.310372	0.294354	0.292639	0.620901	0.153124	0.437929	0.361953	0.553389	0.273378	0.437995	0.189824	0.539034	0.193661	0.462974	0.0137509	0.55364	0.132223	0.580492	0.0907774
8.631	0.141879	0.85223	0.257166	0.496845	0.254212	0.810752	0.235536	0.930188	0.211399	0.653896	0.36912	0.36912	0.237525	0.951893	0.161009	0.931135	0.209153	0.782399	0.400231	0.768075	0.141729	0.54159	0.258965	0.0273394	0.214748	0.669183	0.175331	0.42658	0.146179	0.640161	0.321389	0.277639	0.303877	0.639241	0.156748	0.47451	0.349548	0.586225	0.269762	0.452948	0.172596	0.557171	0.24283	0.473183	0.0127263	0.61159	0.12865	0.568501	0.0981476
8.768	0.213938	0.905161	0.258025	0.487172	0.243472	0.797929	0.26842	0.948905	0.240923	0.653794	0.361525	0.361525	0.213832	0.933263	0.169772	0.90013	0.224459	0.79118	0.308776	0.802132	0.154286	0.558527	0.235802	0.0380007	0.215641	0.673089	0.166602	0.455736	0.147786	0.616153	0.32466	0.273453	0.297394	0.641756	0.141654	0.493121	0.317498	0.586897	0.255956	0.448722	0.156351	0.57959	0.305209	0.458695	0.0181182	0.704041	0.129277	0.593599	0.100565
8.905	0.049982	0.937466	0.300115	0.452497	0.271381	0.751393	0.29469	0.942031	0.274215	0.663138	0.354853	0.354853	0.149683	0.932162	0.166224	0.876589	0.148415	0.775671	0.262876	0.827316	0.128969	0.5851	0.247167	0.0507819	0.190304	0.67131	0.154786	0.488774	0.179023	0.632232	0.309349	0.298635	0.338977	0.635976	0.144456	0.492213	0.287314	0.597606	0.242654	0.43793	0.16696	0.595972	0.330777	0.437381	0.0152438	0.763313	0.139176	0.641358	0.0878206
9.042	0.0517474	0.933599	0.320867	0.426063	0.216209	0.691733	0.320991	0.914563	0.284875	0.683736	0.336623	0.336623	0.126758	0.941499	0.163827	0.858735	0.110396	0.786307	0.244242	0.833684	0.121449	0.627291	0.251121	0.0526549	0.198328	0.670197	0.147723	0.532833	0.196313	0.654488	0.274174	0.340551	0.368025	0.649245	0.156044	0.468593	0.275326	0.621669	0.236176	0.440858	0.190727	0.601994	0.326758	0.425422	0.0261991	0.777982	0.140921	0.68793	0.0688552
9.179	0.14284	1.05433	0.247906	0.425826	0.178609	0.671885	0.347021	0.881196	0.282468	0.716064	0.312497	0.312497	0.152833	0.955847	0.147553	0.857287	0.0482757	0.804724	0.23907	0.816034	0.109541	0.665094	0.221343	0.0598999	0.193877	0.662999	0.141357	0.598857	0.171699	0.65958	0.266342	0.383756	0.341444	0.626983	0.144111	0.443151	0.289738	0.637299	0.219789	0.444627	0.236072	0.616151	0.343841	0.416231	0.0596399	0.801142	0.131174	0.720346	0.0700794
9.316	0.0529243	1.06972	0.272084	0.419938	0.229491	0.66612	0.353065	0.858193	0.289028	0.743283	0.303597	0.303597	0.170973	0.957063	0.165288	0.866938	0.0372885	0.834715	0.163628	0.785061	0.08127	0.704997	0.209778	0.0667356	0.20464	0.644703	0.137929	0.664368	0.172548	0.651505	0.227402	0.421734	0.320134	0.591171	0.144711	0.417815	0.281734	0.662327	0.201557	0.447435	0.257831	0.608475	0.387187	0.39593	0.0944809	0.798966	0.139943	0.745122	0.0990955
9.453	0.0548471	1.13799	0.354578	0.38261	0.280749	0.635917	0.362122	0.854787	0.282906	0.749072	0.32704	0.32704	0.164888	0.941172	0.187141	0.886793	0.0840198	0.837712	0.162973	0.780787	0.0585933	0.749786	0.211696	0.0690046	0.240511	0.625412	0.141525	0.735795	0.169552	0.651353	0.203084	0.42783	0.307091	0.557162	0.152069	0.391243	0.272757	0.696805	0.185856	0.441091	0.269052	0.584678	0.4241	0.370006	0.118459	0.786328	0.140588	0.770483	0.123384
9.59	0.119958	1.18747	0.293421	0.372259	0.244212	0.636642	0.375147	0.876055	0.265686	0.736028	0.360651	0.360651	0.167817	0.924374	0.194806	0.912716	0.0594972	0.842155	0.134852	0.772323	0.0808535	0.79448	0.231482	0.0767484	0.279612	0.59642	0.152036	0.814338	0.177762	0.675647	0.191971	0.431075	0.270433	0.53168	0.147278	0.407925	0.269704	0.703285	0.216498	0.436223	0.275121	0.544495	0.38786	0.355926	0.111908	0.756546	0.117608	0.786221	0.137798
9.727	0.0373676	1.18096	0.31916	0.362305	0.274794	0.624872	0.369592	0.904779	0.256448	0.717386	0.390376	0.390376	0.164888	0.909763	0.248789	0.939485	0.0453	0.872981	0.123006	0.728863	0.072446	0.850189	0.265954	0.0817074	0.310677	0.559799	0.162675	0.874616	0.17735	0.66806	0.201985	0.405727	0.248175	0.498321	0.139145	0.393482	0.243016	0.682871	0.22817	0.426228	0.284656	0.513236	0.325158	0.368169	0.113007	0.710741	0.109923	0.798069	0.16613
9.864	0.10189	1.25811	0.317861	0.395882	0.302827	0.669193	0.358881	0.924894	0.249447	0.687965	0.428728	0.428728	0.149173	0.898234	0.275233	0.948349	0.0609147	0.905889	0.115946	0.698366	0.0806807	0.89702	0.300204	0.102367	0.32208	0.541737	0.14591	0.905668	0.18234	0.659856	0.202424	0.398781	0.232742	0.467262	0.150452	0.397971	0.236794	0.667444	0.232968	0.429457	0.276659	0.505011	0.273949	0.401847	0.114945	0.640412	0.110075	0.805635	0.216221
10.001	0.083179	1.24999	0.357294	0.435274	0.295315	0.697048	0.365473	0.932393	0.258689	0.655302	0.470883	0.470883	0.155686	0.885096	0.249052	0.956334	0.0680079	0.939172	0.0747645	0.713657	0.10098	0.92176	0.33103	0.11867	0.332881	0.519589	0.1281	0.916274	0.19113	0.639785	0.183932	0.394334	0.261863	0.440602	0.159674	0.411688	0.212079	0.652383	0.239706	0.419716	0.25156	0.487656	0.260614	0.460293	0.0835627	0.586818	0.126951	0.811144	0.242337
10.138	0.0480045	1.22047	0.326288	0.463444	0.276357	0.708886	0.399147	0.918764	0.287225	0.633524	0.493058	0.493058	0.185261	0.883175	0.16174	0.986154	0.114058	0.998168	0.0203863	0.7388	0.101028	0.935376	0.350402	0.128821	0.335239	0.515216	0.122666	0.913551	0.18824	0.628158	0.165793	0.396101	0.264437	0.42878	0.16919	0.417177	0.212466	0.658739	0.241985	0.416305	0.246248	0.486733	0.262598	0.504513	0.058977	0.524409	0.158535	0.811939	0.220804
10.275	0.158554	1.19819	0.339679	0.47831	0.221	0.749739	0.456477	0.881809	0.333746	0.615124	0.50964	0.50964	0.203426	0.90647	0.19825	0.992596	0.133214	1.0481	0.0483227	0.72324	0.101032	0.930218	0.378806	0.13631	0.271738	0.522793	0.126287	0.880482	0.178215	0.617946	0.148238	0.431825	0.249178	0.427846	0.140116	0.446547	0.212126	0.654989	0.239779	0.43487	0.236072	0.522081	0.220038	0.53034	0.0446558	0.462819	0.160164	0.800526	0.198059
10.412	0.0901277	1.13389	0.28887	0.514683	0.289989	0.750266	0.505647	0.83636	0.389946	0.590153	0.529214	0.529214	0.218767	0.935346	0.200755	1.00337	0.165334	1.05575	0.11701	0.740405	0.0864206	0.894815	0.353152	0.14543	0.189209	0.522717	0.137155	0.849765	0.169247	0.622315	0.145567	0.464397	0.245145	0.442268	0.141367	0.466913	0.207924	0.657448	0.230189	0.443262	0.205741	0.556551	0.193249	0.561422	0.0383969	0.428798	0.158805	0.77821	0.199635
10.549	0.0945139	1.06905	0.272084	0.525823	0.291956	0.794075	0.521009	0.791316	0.422144	0.554295	0.561771	0.561771	0.233933	0.949207	0.182343	1.01739	0.179642	1.11386	0.127357	0.763482	0.0704738	0.856022	0.334817	0.146442	0.145169	0.514454	0.157562	0.818018	0.158514	0.61685	0.152033	0.495198	0.231121	0.455479	0.133664	0.47868	0.215205	0.664736	0.227346	0.466192	0.179638	0.592327	0.186607	0.594099	0.0354112	0.404265	0.171849	0.752869	0.20526
10.686	0.106379	0.989973	0.309003	0.548156	0.306273	0.818796	0.525094	0.748879	0.42231	0.524652	0.604841	0.604841	0.221684	0.935926	0.0945096	1.02182	0.147618	1.14066	0.187051	0.769541	0.0702145	0.7845	0.327594	0.149105	0.127599	0.509048	0.16649	0.782213	0.172441	0.610244	0.143929	0.503756	0.224868	0.495498	0.150511	0.485554	0.210131	0.680083	0.207178	0.478392	0.183417	0.642966	0.181689	0.617495	0.0341919	0.381021	0.174796	0.713062	0.192767
10.823	0.0783687	0.933424	0.227402	0.589093	0.293301	0.770585	0.525053	0.716517	0.397162	0.512644	0.63423	0.63423	0.198102	0.903938	0.0243067	1.03802	0.15077	1.15615	0.306799	0.771164	0.0994915	0.7125	0.325573	0.151511	0.134069	0.511457	0.17143	0.73921	0.200285	0.597346	0.145854	0.522569	0.212081	0.521041	0.169965	0.5058	0.196234	0.718572	0.224737	0.490278	0.185763	0.700617	0.174278	0.627524	0.0316605	0.372588	0.188608	0.6775	0.185026
10.96	0.0522811	0.931639	0.254656	0.621182	0.299908	0.770819	0.493288	0.688241	0.359551	0.526315	0.629115	0.629115	0.191817	0.87063	0.0158566	1.0201	0.15986	1.19977	0.324841	0.820015	0.123567	0.642676	0.32484	0.172421	0.135716	0.507862	0.181091	0.696436	0.206369	0.599339	0.176951	0.53638	0.199448	0.542455	0.163689	0.520765	0.20021	0.776627	0.233114	0.504772	0.187776	0.761642	0.181316	0.640325	0.044526	0.359069	0.207335	0.670214	0.193112
11.097	0.121724	0.938209	0.303589	0.644892	0.230069	0.79077	0.440027	0.662843	0.326858	0.565675	0.600682	0.600682	0.230594	0.842033	0.0455327	0.983326	0.147952	1.23654	0.322643	0.813523	0.126572	0.59122	0.280032	0.204657	0.168804	0.494498	0.19367	0.661456	0.203292	0.592631	0.16356	0.539387	0.198027	0.567232	0.147389	0.536501	0.191748	0.834964	0.226284	0.532924	0.216008	0.816542	0.185284	0.619337	0.0759315	0.363076	0.204142	0.710978	0.189176
11.234	0.0876712	0.893576	0.37769	0.625805	0.22476	0.836597	0.394851	0.645733	0.299854	0.612517	0.563734	0.563734	0.284204	0.830047	0.0656144	0.927294	0.124593	1.25733	0.200767	0.790247	0.102438	0.555117	0.236843	0.245381	0.204445	0.483618	0.206066	0.627999	0.190697	0.598686	0.141253	0.518747	0.189303	0.5794	0.135652	0.53034	0.190391	0.835	0.232455	0.55918	0.259118	0.851177	0.201869	0.584424	0.101477	0.368352	0.191203	0.758965	0.178805
11.371	0.20779	0.897294	0.294491	0.701552	0.260641	0.833635	0.365098	0.648773	0.273121	0.656113	0.534801	0.534801	0.277266	0.849811	0.0184118	0.926633	0.0945133	1.26913	0.103868	0.810142	0.0874145	0.542195	0.195663	0.288842	0.273495	0.480721	0.218284	0.591723	0.149053	0.615416	0.134151	0.481989	0.151889	0.585107	0.126794	0.492033	0.183617	0.885763	0.232968	0.56991	0.275353	0.870873	0.191621	0.554226	0.118167	0.346098	0.186435	0.794749	0.179854
11.508	0.077941	0.911841	0.190449	0.691726	0.273314	0.831344	0.343981	0.65602	0.255517	0.689011	0.567597	0.567597	0.241835	0.875182	0.0846523	0.898281	0.060923	1.28434	0.085484	0.842177	0.0928951	0.538138	0.193575	0.344089	0.359183	0.472605	0.223621	0.565223	0.113564	0.624356	0.137967	0.451268	0.1369	0.587035	0.110912	0.446602	0.167564	0.951609	0.249506	0.594931	0.265374	0.848945	0.201168	0.505109	0.125446	0.329176	0.18073	0.828059	0.180387
11.645	0.0901277	0.911517	0.27507	0.676968	0.329243	0.804362	0.320623	0.658838	0.267546	0.683994	0.642645	0.642645	0.228858	0.88502	0.12596	0.866612	0.0634878	1.24238	0.0837392	0.885871	0.0928401	0.546798	0.199513	0.393763	0.405491	0.476406	0.212478	0.54666	0.116448	0.627815	0.126485	0.428215	0.146286	0.588451	0.111805	0.425163	0.151026	0.952844	0.251973	0.63532	0.260157	0.80608	0.216708	0.472668	0.1505	0.317842	0.159859	0.862609	0.183595
11.782	0.0920539	0.991178	0.290378	0.654928	0.363278	0.847061	0.299944	0.661213	0.294275	0.627378	0.683202	0.683202	0.233222	0.883902	0.183542	0.848324	0.0795107	1.22257	0.0532775	0.949784	0.102002	0.579971	0.192346	0.431501	0.415129	0.479021	0.201314	0.531672	0.118213	0.635867	0.112504	0.378033	0.165261	0.579809	0.0822682	0.393475	0.175312	0.967783	0.255214	0.660122	0.268002	0.758491	0.216714	0.4545	0.157148	0.312025	0.129528	0.890517	0.180588
11.919	0.0479498	0.987102	0.246499	0.67138	0.388782	0.842446	0.319672	0.653058	0.30931	0.553689	0.63859	0.63859	0.282415	0.877426	0.263656	0.834303	0.0886336	1.25048	0.0990491	0.985875	0.150007	0.621164	0.207076	0.458596	0.329466	0.48143	0.193843	0.530055	0.124388	0.657118	0.124348	0.348187	0.180942	0.542175	0.0802869	0.378925	0.204323	0.961152	0.218521	0.690209	0.307147	0.687381	0.226991	0.447255	0.16522	0.307131	0.112577	0.921587	0.181254
12.056	0.142518	1.03719	0.285283	0.678887	0.402918	0.889822	0.362775	0.630607	0.319314	0.491337	0.573791	0.573791	0.36078	0.859307	0.268662	0.789448	0.106118	1.25588	0.0972049	0.997963	0.171497	0.670942	0.208394	0.490324	0.199948	0.483968	0.191287	0.536468	0.128493	0.697853	0.133305	0.320606	0.219251	0.517883	0.0885639	0.384177	0.213006	0.934267	0.199515	0.704861	0.340565	0.615611	0.263531	0.431354	0.185749	0.306037	0.11185	0.948215	0.189697
12.193	0.188922	1.03935	0.276943	0.676509	0.438191	0.864151	0.393207	0.597273	0.324998	0.445627	0.549813	0.549813	0.41163	0.821115	0.195745	0.769653	0.152576	1.2276	0.134793	1.07135	0.153429	0.716187	0.194815	0.515019	0.150376	0.486291	0.185252	0.531506	0.131265	0.717231	0.154014	0.315516	0.227386	0.564768	0.105874	0.40649	0.186539	0.901857	0.202898	0.713433	0.355231	0.555807	0.302434	0.43266	0.211137	0.309791	0.118118	0.955236	0.193175
12.33	0.127762	1.05344	0.264419	0.644838	0.372962	0.855854	0.405757	0.561163	0.30931	0.418144	0.551874	0.551874	0.397789	0.768356	0.207013	0.778688	0.213497	1.23054	0.186344	1.14671	0.156655	0.757002	0.208408	0.552079	0.144318	0.507577	0.182349	0.536492	0.141978	0.733418	0.169477	0.317161	0.22381	0.621466	0.111388	0.426257	0.171587	0.883709	0.237096	0.726934	0.34838	0.497636	0.327323	0.445422	0.212889	0.331565	0.129851	0.953712	0.220659
12.467	0.173043	1.11367	0.320165	0.629201	0.3958	0.881504	0.403028	0.53194	0.270552	0.410794	0.554576	0.554576	0.362044	0.710043	0.22052	0.772484	0.227669	1.20883	0.159483	1.17271	0.163161	0.793725	0.193231	0.586919	0.146566	0.513439	0.181661	0.532975	0.132252	0.746775	0.161035	0.327863	0.255512	0.673549	0.155601	0.439234	0.19037	0.854428	0.290644	0.736937	0.335283	0.453159	0.320014	0.471565	0.228504	0.346406	0.138479	0.943809	0.243109
12.604	0.195549	1.05406	0.299514	0.609268	0.440965	0.847469	0.385238	0.511829	0.252729	0.425237	0.576239	0.576239	0.338829	0.655352	0.202734	0.779785	0.210877	1.26525	0.165711	1.19023	0.1334	0.825055	0.164475	0.612068	0.179643	0.509162	0.176451	0.514815	0.138198	0.762943	0.144569	0.353673	0.287616	0.746933	0.158325	0.442939	0.189379	0.840201	0.293363	0.712091	0.340499	0.444032	0.274718	0.496923	0.231689	0.360681	0.143417	0.914782	0.276664
12.741	0.0559693	1.02849	0.320582	0.577937	0.429031	0.836439	0.376218	0.490237	0.275199	0.446811	0.599213	0.599213	0.327724	0.602101	0.218436	0.748935	0.168227	1.27889	0.175765	1.22722	0.158458	0.870393	0.163364	0.63964	0.174161	0.503075	0.170299	0.497552	0.151062	0.784349	0.127166	0.374765	0.308038	0.746678	0.161701	0.442447	0.16773	0.830659	0.281585	0.683785	0.371077	0.414922	0.247646	0.531231	0.239983	0.35808	0.141214	0.888287	0.328701
12.878	0.122097	1.00436	0.352499	0.554345	0.410817	0.814956	0.381177	0.468346	0.293019	0.466994	0.625289	0.625289	0.306551	0.551162	0.228085	0.755679	0.110346	1.26834	0.207846	1.24424	0.140814	0.904355	0.168791	0.681835	0.16036	0.511702	0.164845	0.492765	0.1386	0.793523	0.111683	0.399967	0.291637	0.728398	0.162535	0.432612	0.172255	0.816814	0.259664	0.654822	0.419469	0.402863	0.233469	0.553963	0.291185	0.353467	0.131215	0.872403	0.372658
13.015	0.193944	0.975582	0.411814	0.582886	0.487041	0.744183	0.385212	0.460248	0.294113	0.485601	0.647751	0.647751	0.31024	0.507574	0.254425	0.771689	0.130095	1.24783	0.26193	1.21584	0.132591	0.943436	0.186523	0.726947	0.172373	0.518473	0.165048	0.496929	0.153275	0.783959	0.118562	0.424543	0.290774	0.714674	0.193095	0.437758	0.156937	0.788512	0.235188	0.624252	0.464128	0.390424	0.24469	0.593477	0.395485	0.360167	0.127883	0.864425	0.405893
13.152	0.157487	0.979349	0.4974	0.551203	0.495532	0.739778	0.39071	0.465073	0.311442	0.491154	0.631078	0.631078	0.316564	0.471428	0.283997	0.736039	0.155136	1.25076	0.243947	1.19423	0.144425	0.960267	0.20876	0.754086	0.190389	0.524388	0.165858	0.500734	0.148326	0.756626	0.115947	0.433014	0.269174	0.684258	0.243409	0.420045	0.156006	0.770241	0.256908	0.603627	0.561537	0.385367	0.260964	0.616798	0.487885	0.365241	0.140892	0.833183	0.432982
13.289	0.239437	0.946892	0.516666	0.522675	0.567492	0.666907	0.40723	0.473603	0.367038	0.485189	0.612828	0.612828	0.324263	0.445064	0.352062	0.747647	0.153895	1.23717	0.22387	1.15483	0.123606	0.954458	0.211163	0.782594	0.189425	0.522252	0.175993	0.506085	0.129704	0.719562	0.114122	0.419748	0.254347	0.652762	0.252559	0.412148	0.146897	0.751584	0.2779	0.581289	0.683117	0.389074	0.267132	0.633564	0.500421	0.355768	0.165072	0.797422	0.468728
13.426	0.22228	0.939151	0.543324	0.52307	0.587812	0.656996	0.425971	0.480715	0.415091	0.477328	0.645168	0.645168	0.360183	0.428943	0.381479	0.738998	0.116399	1.24386	0.281628	1.04418	0.145116	0.948625	0.235354	0.799377	0.15862	0.515062	0.193757	0.504932	0.117089	0.712733	0.125306	0.419793	0.24509	0.603532	0.284924	0.403574	0.131388	0.742952	0.313921	0.57444	0.76353	0.389041	0.286866	0.645493	0.461959	0.329081	0.188725	0.764282	0.495654
13.563	0.231206	0.950804	0.415592	0.53089	0.625018	0.638129	0.439662	0.490603	0.449862	0.457075	0.702071	0.702071	0.380752	0.410019	0.345335	0.725506	0.113421	1.24876	0.307053	0.962713	0.156195	0.935996	0.248285	0.829044	0.137144	0.521367	0.204584	0.504216	0.127481	0.661326	0.153802	0.428266	0.238086	0.550409	0.330878	0.40171	0.122781	0.723843	0.319771	0.568346	0.823167	0.398844	0.340749	0.631168	0.368494	0.319209	0.182944	0.73824	0.533854
13.7	0.202176	0.933057	0.480208	0.520746	0.537119	0.611561	0.434365	0.503951	0.499827	0.415431	0.71395	0.71395	0.412005	0.390255	0.374958	0.672109	0.130387	1.25625	0.281145	0.91466	0.188831	0.893479	0.225604	0.858838	0.116677	0.526405	0.207309	0.514657	0.14594	0.632705	0.181956	0.430226	0.282716	0.527551	0.337545	0.416722	0.121459	0.67698	0.313513	0.56526	0.815438	0.428475	0.406028	0.604103	0.291769	0.3272	0.165652	0.709878	0.525536
13.837	0.212122	0.924775	0.547916	0.493111	0.404801	0.5761	0.405117	0.518394	0.552089	0.36513	0.647103	0.647103	0.423486	0.373427	0.515	0.647765	0.121675	1.27891	0.30635	0.883981	0.240302	0.857112	0.199602	0.879291	0.110915	0.528894	0.194352	0.517152	0.134495	0.613925	0.2302	0.429915	0.315584	0.533243	0.341677	0.420042	0.119494	0.652852	0.326729	0.559763	0.779266	0.450021	0.439606	0.579729	0.262737	0.34701	0.162917	0.677387	0.514091
13.974	0.34737	0.911704	0.525067	0.506801	0.316263	0.561431	0.381693	0.536872	0.589429	0.321679	0.579573	0.579573	0.391322	0.360522	0.642162	0.606497	0.152132	1.30383	0.288235	0.874965	0.257545	0.812321	0.188529	0.914601	0.13699	0.526182	0.17721	0.528975	0.128518	0.60122	0.259296	0.427395	0.351939	0.55422	0.301029	0.407464	0.125439	0.645892	0.357613	0.555922	0.698747	0.446812	0.435333	0.558401	0.26003	0.362854	0.160287	0.662135	0.508598
14.111	0.363833	0.898106	0.537317	0.510161	0.43469	0.559574	0.368547	0.551214	0.60397	0.293029	0.5784	0.5784	0.361655	0.342534	0.616553	0.569746	0.146165	1.33002	0.350977	0.845959	0.297716	0.780578	0.213784	0.964671	0.145354	0.529502	0.172306	0.552103	0.111733	0.604314	0.238254	0.429763	0.376352	0.579471	0.238026	0.409958	0.139991	0.641487	0.369803	0.54133	0.631512	0.433941	0.435141	0.547422	0.265297	0.362331	0.165061	0.666021	0.53349
14.248	0.325986	0.822796	0.625232	0.533128	0.348701	0.563855	0.352867	0.555362	0.584182	0.272861	0.625522	0.625522	0.401689	0.315518	0.5379	0.541712	0.11416	1.34015	0.451359	0.823556	0.332623	0.744829	0.20206	1.01976	0.130709	0.548194	0.1709	0.580803	0.115303	0.613373	0.220049	0.435838	0.418195	0.603422	0.208196	0.469533	0.128544	0.612256	0.372018	0.518351	0.588558	0.397851	0.460646	0.555473	0.269553	0.372909	0.174972	0.690312	0.555889
14.385	0.416863	0.874796	0.771862	0.587753	0.331872	0.558733	0.341188	0.555504	0.546295	0.259652	0.670577	0.670577	0.457931	0.298121	0.435149	0.528645	0.137499	1.3296	0.482089	0.817522	0.336599	0.7342	0.208916	1.05667	0.108306	0.581687	0.164106	0.596131	0.12242	0.607507	0.211047	0.427485	0.446663	0.610442	0.178803	0.505054	0.125409	0.602505	0.395794	0.501792	0.553611	0.358301	0.497593	0.550013	0.288111	0.359877	0.16929	0.727445	0.545581
14.522	0.334112	0.817496	0.870265	0.63288	0.466322	0.533584	0.329945	0.559658	0.512456	0.250124	0.692164	0.692164	0.478053	0.289738	0.384243	0.540439	0.152819	1.30775	0.47099	0.807841	0.310575	0.736812	0.199691	1.07738	0.0896996	0.620129	0.158881	0.605987	0.136957	0.606444	0.229	0.389201	0.447798	0.604958	0.162099	0.541124	0.127553	0.632325	0.418357	0.49291	0.533926	0.336298	0.526903	0.552397	0.320356	0.359189	0.156971	0.751866	0.50406
14.659	0.481602	0.813195	0.693867	0.63349	0.333419	0.572361	0.316501	0.570087	0.4802	0.238405	0.70046	0.70046	0.475896	0.290951	0.337353	0.55796	0.188172	1.2984	0.506054	0.805083	0.258444	0.730373	0.202001	1.10098	0.113986	0.646392	0.159141	0.601356	0.133193	0.607015	0.246318	0.342461	0.488716	0.605036	0.143974	0.576104	0.148522	0.660357	0.438772	0.479001	0.493601	0.315306	0.537265	0.558012	0.363129	0.394896	0.130682	0.775155	0.466958
14.796	0.350791	0.778106	0.595131	0.660489	0.384781	0.617705	0.310119	0.589848	0.433461	0.224515	0.694596	0.694596	0.453767	0.288753	0.325617	0.575456	0.217724	1.28139	0.596364	0.793312	0.253549	0.73985	0.198499	1.12467	0.108886	0.676685	0.156991	0.581903	0.120751	0.587997	0.314338	0.320295	0.508498	0.596606	0.139523	0.601379	0.155602	0.679781	0.445565	0.462999	0.475287	0.310733	0.52973	0.535054	0.378179	0.382249	0.12527	0.792272	0.468414
14.933	0.51031	0.701206	0.565464	0.658693	0.290883	0.609015	0.302003	0.625955	0.401043	0.210489	0.677483	0.677483	0.415894	0.283232	0.323167	0.585354	0.205091	1.28883	0.69588	0.803805	0.263379	0.767843	0.170597	1.13489	0.0994301	0.698938	0.15853	0.553812	0.134846	0.577451	0.39692	0.307372	0.483325	0.594981	0.141661	0.615777	0.125677	0.725228	0.488246	0.445861	0.493268	0.323538	0.498673	0.517857	0.380524	0.383374	0.126219	0.783544	0.469262
15.07	0.379766	0.702689	0.529817	0.658326	0.271249	0.629694	0.278632	0.67082	0.411375	0.199982	0.666302	0.666302	0.370907	0.283973	0.325567	0.587004	0.240476	1.2291	0.665238	0.762996	0.268203	0.784998	0.147161	1.13521	0.109271	0.717798	0.152153	0.520799	0.155544	0.573868	0.443223	0.310345	0.472898	0.617033	0.135384	0.660412	0.117819	0.7608	0.526894	0.430569	0.505855	0.309975	0.468068	0.503878	0.339847	0.386179	0.115084	0.753404	0.465281
15.207	0.379284	0.682796	0.446054	0.6736	0.32549	0.66806	0.259711	0.707083	0.439364	0.18921	0.658428	0.658428	0.365622	0.283166	0.305122	0.600031	0.208977	1.1505	0.633197	0.758416	0.27647	0.798927	0.12753	1.13801	0.0843795	0.753799	0.149418	0.514477	0.170437	0.578323	0.458031	0.335203	0.477141	0.626942	0.123379	0.662238	0.107264	0.796065	0.604537	0.432173	0.535248	0.301876	0.44388	0.488213	0.28998	0.383956	0.120274	0.723142	0.424093
15.344	0.296905	0.620485	0.520797	0.671524	0.354935	0.65959	0.263608	0.731982	0.460303	0.16974	0.633094	0.633094	0.406902	0.277186	0.276018	0.595279	0.278772	1.08681	0.606652	0.722342	0.294487	0.807522	0.130203	1.14387	0.098524	0.772435	0.160786	0.525909	0.17087	0.588643	0.478549	0.352838	0.497798	0.661796	0.113949	0.635507	0.112729	0.864784	0.72624	0.442591	0.542084	0.305101	0.428103	0.486187	0.242278	0.389501	0.148419	0.681213	0.376507
15.481	0.414407	0.584493	0.478929	0.681046	0.36887	0.67314	0.27137	0.757142	0.453962	0.149001	0.59232	0.59232	0.415237	0.272071	0.312424	0.580645	0.324011	1.08647	0.525155	0.693578	0.30102	0.810937	0.114303	1.14509	0.148155	0.79274	0.187885	0.533209	0.166266	0.579546	0.433677	0.373025	0.497695	0.650453	0.128724	0.612503	0.110696	0.930962	0.836686	0.450348	0.577717	0.326889	0.4173	0.473723	0.206065	0.396768	0.204652	0.664128	0.337885
15.618	0.331118	0.550643	0.412099	0.686366	0.344552	0.640913	0.267928	0.789104	0.413454	0.14732	0.569588	0.569588	0.421272	0.270217	0.33704	0.557479	0.3504	1.07272	0.450225	0.653334	0.297791	0.8053	0.125764	1.14425	0.194185	0.81878	0.213715	0.529423	0.187131	0.57931	0.389975	0.418362	0.495741	0.587914	0.165527	0.602413	0.109875	0.966457	0.959569	0.450472	0.608895	0.342386	0.411924	0.485059	0.190812	0.391695	0.264493	0.664651	0.309378
15.755	0.503522	0.52164	0.440213	0.650738	0.365702	0.605925	0.269776	0.8171	0.396068	0.170529	0.565741	0.565741	0.446043	0.267818	0.337094	0.535039	0.345213	1.02247	0.464011	0.592204	0.290232	0.773153	0.135204	1.12468	0.225104	0.836361	0.238074	0.541579	0.206878	0.58288	0.326016	0.437547	0.515732	0.573212	0.178927	0.576528	0.105112	0.998234	1.07248	0.448234	0.621997	0.346959	0.401071	0.493297	0.158451	0.383163	0.269829	0.657168	0.301593
15.892	0.47118	0.506197	0.408201	0.621567	0.350191	0.612362	0.28641	0.83269	0.439639	0.213388	0.561478	0.561478	0.460602	0.263007	0.332138	0.523913	0.331247	1.00102	0.391459	0.568209	0.268231	0.766188	0.142974	1.11437	0.218915	0.852971	0.262556	0.530022	0.239859	0.58571	0.312317	0.443412	0.506419	0.567223	0.19971	0.567638	0.111342	0.985808	1.11548	0.455995	0.6375	0.364498	0.383123	0.502227	0.142146	0.368693	0.261306	0.645377	0.290532
16.029	0.529449	0.465263	0.295421	0.566737	0.327047	0.602166	0.293565	0.824976	0.503327	0.264947	0.57834	0.57834	0.457877	0.259276	0.32687	0.512075	0.330522	1.01612	0.311659	0.526564	0.259576	0.770981	0.1578	1.10463	0.208663	0.83566	0.280925	0.502811	0.260012	0.607632	0.286815	0.48213	0.46767	0.561449	0.213468	0.576816	0.109382	1.00674	1.08616	0.449713	0.653448	0.376916	0.356492	0.518637	0.14343	0.358517	0.244354	0.646121	0.277989
16.166	0.698804	0.430574	0.310388	0.618877	0.368574	0.523404	0.312627	0.796756	0.536453	0.312331	0.623062	0.623062	0.441226	0.261284	0.306425	0.490705	0.294524	1.0195	0.276875	0.481614	0.316283	0.774921	0.166007	1.09358	0.240092	0.802714	0.306593	0.474776	0.265379	0.653857	0.303054	0.535487	0.437576	0.542443	0.231808	0.581365	0.108689	0.980208	1.04564	0.43918	0.642616	0.375739	0.326866	0.536434	0.164747	0.342899	0.237665	0.663351	0.286369
16.303	0.544468	0.412447	0.389663	0.578984	0.410175	0.519776	0.344001	0.759347	0.531701	0.339092	0.65767	0.65767	0.432006	0.275734	0.329738	0.469041	0.290644	1.08052	0.268018	0.454738	0.358973	0.787909	0.216597	1.08027	0.193877	0.760342	0.317181	0.446764	0.250038	0.677842	0.344392	0.602168	0.441733	0.55218	0.224554	0.555626	0.106469	0.950069	1.06738	0.435955	0.617214	0.375481	0.282208	0.561774	0.182471	0.319323	0.223994	0.680762	0.317589
16.44	0.494914	0.376412	0.359534	0.574785	0.36195	0.545895	0.376818	0.70969	0.51579	0.341762	0.643007	0.643007	0.450532	0.307995	0.379287	0.445043	0.286058	1.20157	0.288434	0.454183	0.394422	0.813348	0.25543	1.08081	0.146624	0.697551	0.312465	0.437507	0.25223	0.721466	0.348651	0.6598	0.438225	0.557725	0.266376	0.528047	0.114353	0.932008	1.09076	0.425325	0.593735	0.37679	0.220405	0.558352	0.225194	0.30829	0.209174	0.693122	0.35029
16.577	0.535648	0.367238	0.477053	0.550682	0.313721	0.537752	0.434636	0.658891	0.504968	0.335811	0.587592	0.587592	0.478825	0.360089	0.368177	0.424381	0.227005	1.34356	0.273724	0.469282	0.405706	0.832227	0.272566	1.09292	0.142303	0.659406	0.310112	0.438391	0.25166	0.738476	0.331354	0.707343	0.46181	0.542371	0.33413	0.529202	0.12091	0.863097	1.07814	0.421682	0.57979	0.363669	0.173096	0.545989	0.264369	0.298574	0.189844	0.705562	0.393287
16.714	0.660526	0.319665	0.409627	0.531472	0.353752	0.526561	0.489046	0.608956	0.501524	0.327172	0.54292	0.54292	0.485909	0.417833	0.35227	0.414487	0.302392	1.48951	0.268085	0.458681	0.377022	0.843972	0.309814	1.0842	0.145426	0.607357	0.299158	0.426202	0.24017	0.746565	0.351348	0.738405	0.499599	0.523556	0.361242	0.532411	0.129173	0.783676	1.04809	0.438304	0.569468	0.359502	0.140677	0.528895	0.288719	0.289817	0.198783	0.72361	0.393928
16.851	0.69319	0.283775	0.389884	0.53211	0.328489	0.545972	0.526838	0.554247	0.488401	0.309988	0.555457	0.555457	0.476128	0.456656	0.384138	0.405186	0.286422	1.64608	0.273868	0.445398	0.320735	0.841909	0.270408	1.08097	0.148265	0.565072	0.30067	0.407848	0.248344	0.736193	0.330043	0.779326	0.540533	0.506109	0.371957	0.545071	0.131775	0.733106	1.07713	0.472902	0.579851	0.36667	0.131435	0.517548	0.308766	0.272112	0.21468	0.728593	0.353241
16.988	0.761992	0.226037	0.460848	0.5618	0.375985	0.569178	0.550892	0.509872	0.462543	0.279785	0.616194	0.616194	0.47374	0.452251	0.428264	0.405317	0.317149	1.6746	0.249082	0.464664	0.336442	0.851417	0.230642	1.06095	0.145591	0.541571	0.303639	0.401194	0.240424	0.688562	0.323365	0.788158	0.554417	0.496167	0.338164	0.536773	0.125341	0.684727	1.08882	0.490088	0.58483	0.369567	0.149354	0.493867	0.315405	0.283673	0.217064	0.712111	0.295447
17.125	0.813202	0.200728	0.509852	0.590976	0.36704	0.639711	0.544474	0.473456	0.419191	0.252865	0.678505	0.678505	0.526265	0.411733	0.465714	0.420969	0.258052	1.71003	0.227503	0.482955	0.404932	0.862618	0.216664	1.04216	0.128316	0.51849	0.299687	0.392074	0.255282	0.668249	0.310417	0.754859	0.558117	0.490651	0.306757	0.523519	0.136079	0.650417	1.09973	0.499551	0.581965	0.369711	0.149473	0.451253	0.268463	0.294932	0.233131	0.69948	0.257209
17.262	0.630162	0.181895	0.530233	0.596889	0.398043	0.699366	0.527491	0.443005	0.388686	0.240604	0.679666	0.679666	0.617484	0.340087	0.449231	0.441786	0.281778	1.70354	0.232123	0.485914	0.430123	0.865461	0.232267	1.02002	0.145086	0.492775	0.299489	0.366863	0.285323	0.664076	0.26992	0.712007	0.580576	0.46521	0.298454	0.541819	0.120749	0.623009	1.17148	0.516618	0.567132	0.361271	0.1407	0.401532	0.235217	0.303019	0.250288	0.667118	0.241665
17.399	0.695755	0.152366	0.496428	0.598899	0.39971	0.725382	0.507636	0.418272	0.365729	0.233884	0.654253	0.654253	0.649344	0.281856	0.377984	0.456097	0.268096	1.65311	0.244072	0.501787	0.482615	0.853209	0.261493	0.995807	0.153108	0.482973	0.295099	0.343101	0.347935	0.680387	0.232064	0.667323	0.605223	0.435824	0.244119	0.586673	0.139124	0.620027	1.22422	0.531003	0.555342	0.360176	0.144323	0.37594	0.197859	0.314351	0.273385	0.637638	0.220791
17.536	0.778456	0.131058	0.522485	0.598714	0.42768	0.729163	0.493265	0.395114	0.352991	0.231411	0.665943	0.665943	0.584839	0.236613	0.341632	0.459398	0.242694	1.62226	0.220881	0.521518	0.542308	0.840954	0.266698	0.946792	0.149943	0.483303	0.288794	0.319603	0.419106	0.709762	0.216602	0.611204	0.586282	0.425672	0.198061	0.646284	0.153391	0.641589	1.20238	0.564125	0.547451	0.360195	0.175459	0.376051	0.161001	0.327028	0.298906	0.608949	0.211418
17.673	0.70864	0.148324	0.343472	0.594113	0.397333	0.757607	0.471715	0.372314	0.350965	0.23517	0.693391	0.693391	0.574058	0.233325	0.355348	0.468007	0.231213	1.61916	0.229256	0.525716	0.573235	0.838509	0.245238	0.900247	0.104568	0.489649	0.2905	0.315413	0.460257	0.711958	0.253616	0.566663	0.551301	0.430375	0.147774	0.634283	0.164843	0.642273	1.13092	0.598227	0.558071	0.360257	0.208122	0.3758	0.165989	0.321306	0.329535	0.569666	0.234232
17.81	0.593704	0.193632	0.293815	0.583943	0.417054	0.736755	0.438533	0.360294	0.327624	0.238715	0.650648	0.650648	0.501018	0.249734	0.355139	0.474163	0.198456	1.60614	0.224897	0.532617	0.628701	0.822935	0.241248	0.84063	0.0704238	0.501954	0.312903	0.298552	0.460099	0.677402	0.254488	0.544619	0.541084	0.467539	0.128085	0.640428	0.170643	0.644137	1.04274	0.61569	0.569069	0.353526	0.228579	0.378438	0.190714	0.318465	0.378007	0.532829	0.249418
17.947	0.668867	0.205323	0.393107	0.546191	0.385117	0.814323	0.415772	0.371037	0.310129	0.244416	0.537113	0.537113	0.523883	0.246765	0.336414	0.477149	0.184578	1.61112	0.19448	0.541635	0.747927	0.81138	0.244831	0.784952	0.0821108	0.506063	0.345874	0.285199	0.460186	0.662381	0.226777	0.544342	0.570909	0.498741	0.116471	0.633733	0.170932	0.651959	0.987725	0.624625	0.532705	0.341984	0.254548	0.378572	0.240753	0.337481	0.416421	0.510249	0.282534
18.084	0.608245	0.229911	0.387621	0.559737	0.387696	0.872057	0.40879	0.4031	0.315051	0.253584	0.413864	0.413864	0.553339	0.248424	0.362545	0.483885	0.195541	1.61705	0.208464	0.529343	0.923463	0.793914	0.288062	0.717997	0.0821931	0.529901	0.389907	0.2814	0.461681	0.619523	0.211269	0.56131	0.56857	0.484627	0.0969061	0.594829	0.151558	0.617092	0.932104	0.617972	0.514553	0.340088	0.259308	0.409735	0.264286	0.356791	0.459035	0.498198	0.325524
18.221	0.760815	0.287783	0.338306	0.55049	0.321001	0.900471	0.408188	0.456662	0.334131	0.255716	0.33975	0.33975	0.629843	0.278301	0.359886	0.471053	0.229977	1.59564	0.26394	0.527478	1.06002	0.770001	0.322082	0.642438	0.099358	0.569892	0.439806	0.264565	0.44163	0.59552	0.210538	0.586672	0.564477	0.46758	0.0952376	0.595446	0.161096	0.584675	0.884777	0.614289	0.52378	0.333284	0.243486	0.412532	0.240938	0.388054	0.508771	0.486628	0.347716
18.358	0.626741	0.308347	0.236748	0.582766	0.265062	0.927175	0.403808	0.517499	0.349219	0.246224	0.32698	0.32698	0.668488	0.321512	0.31983	0.454558	0.323368	1.58379	0.25057	0.523753	1.10595	0.731253	0.305053	0.587151	0.0994267	0.616584	0.493042	0.250426	0.443146	0.547401	0.192435	0.611814	0.543457	0.445439	0.0553386	0.545121	0.179186	0.542989	0.828803	0.592356	0.525627	0.319402	0.226018	0.401586	0.196686	0.398138	0.560552	0.474212	0.363832
18.495	0.672822	0.349674	0.213801	0.577871	0.26628	0.904936	0.401936	0.552351	0.347687	0.226249	0.321142	0.321142	0.66491	0.327884	0.274294	0.454527	0.319422	1.54649	0.252664	0.521287	1.13202	0.688155	0.274047	0.531037	0.119904	0.671699	0.528503	0.244484	0.45981	0.489497	0.193795	0.601948	0.533286	0.408233	0.0515259	0.544988	0.182537	0.500275	0.765771	0.568361	0.555286	0.310896	0.212825	0.388871	0.162855	0.418932	0.587725	0.459211	0.377021
18.632	0.662986	0.354906	0.19392	0.529015	0.370877	0.892958	0.406728	0.553241	0.339706	0.194855	0.305044	0.305044	0.568605	0.349494	0.315238	0.449182	0.249009	1.49094	0.20563	0.502603	1.11862	0.657056	0.268971	0.491537	0.0930838	0.706472	0.530331	0.246307	0.515905	0.442456	0.206028	0.570144	0.499317	0.401599	0.0548824	0.571779	0.194933	0.495454	0.690608	0.564198	0.598684	0.332647	0.193475	0.378914	0.135729	0.421931	0.583871	0.45302	0.355846
18.769	0.419005	0.362281	0.181531	0.497942	0.339125	0.808958	0.410706	0.53624	0.350913	0.160963	0.307284	0.307284	0.542345	0.378124	0.381479	0.437742	0.234365	1.42849	0.162465	0.518151	1.08947	0.631982	0.268831	0.456387	0.0652891	0.736115	0.526461	0.246324	0.604361	0.382869	0.256952	0.54759	0.476603	0.391551	0.0400815	0.58781	0.223191	0.483985	0.619346	0.56208	0.654351	0.354934	0.185832	0.356033	0.122771	0.405729	0.578465	0.438799	0.354327
18.906	0.487	0.401045	0.213722	0.525315	0.343832	0.698951	0.398735	0.516989	0.343259	0.138599	0.324926	0.324926	0.518498	0.418445	0.403072	0.418154	0.244095	1.39682	0.180697	0.503923	0.957513	0.596698	0.263415	0.42937	0.0426909	0.755821	0.534951	0.252816	0.69742	0.342688	0.316687	0.528543	0.489223	0.386208	0.0281353	0.631156	0.240537	0.477972	0.542288	0.557607	0.646546	0.371315	0.186007	0.332506	0.136976	0.392344	0.539933	0.426922	0.372269
19.043	0.483473	0.398399	0.251482	0.502426	0.492223	0.593756	0.388403	0.512277			0.340627	0.340627	0.420879	0.446396			0.283129	1.3414	0.190478	0.498428	0.85691	0.576065	0.292408	0.425085	0.0661575	0.77631	0.521567	0.250096	0.726465	0.302104	0.308094	0.509815	0.449834	0.38932	0.0243161	0.702857	0.259885	0.500675	0.493927	0.562751	0.607941	0.393923	0.189179	0.307171	0.142229	0.379308	0.49572	0.405301	0.377649
19.18	0.505393	0.370205	0.347085	0.473485	0.439173	0.565241					0.359068	0.359068	0.446647	0.490745			0.331791	1.27823	0.183867	0.494879	0.760774	0.549574	0.315086	0.398416	0.0763823	0.790015	0.490541	0.231024	0.707207	0.295526	0.286099	0.513252	0.450312	0.40897	0.0472375	0.732025	0.300888	0.508504	0.465921	0.547871	0.530954	0.407959	0.194068	0.286129	0.146652	0.352496	0.472882	0.379191	0.369852
19.317	0.398368	0.303886	0.392435	0.512242	0.568427	0.548853					0.380602	0.380602	0.490155	0.514833			0.334576	1.24658	0.198739	0.488805	0.701249	0.515466	0.317925	0.375174	0.0692706	0.790589	0.462444	0.213427	0.723306	0.289674	0.256912	0.508035	0.431772	0.446648	0.0721011	0.741586	0.344998	0.537046	0.460103	0.549262	0.452817	0.425728	0.208223	0.290879	0.144988	0.345656	0.472841	0.358606	0.320766
19.454	0.347797	0.289434	0.296704	0.515201	0.529493	0.515612					0.404042	0.404042	0.580682	0.542823			0.280567	1.21848	0.176755	0.484011	0.62157	0.500821	0.30793	0.36784	0.057055	0.771952	0.415661	0.206838	0.756888	0.302793	0.238153	0.492478	0.403701	0.506198	0.0645345	0.76722	0.386124	0.562356	0.4726	0.554519	0.411331	0.439766	0.231236	0.290016	0.113058	0.342919	0.480133	0.347382	0.271535
19.591	0.461022	0.284561	0.316447	0.483579	0.498484	0.47542					0.407314	0.407314	0.572658	0.572199			0.317478	1.18253	0.142041	0.478218	0.596532	0.48556	0.303051	0.353362	0.0666071	0.755531	0.376874	0.200767	0.865401	0.325979	0.251721	0.474005	0.403868	0.57425	0.0775366	0.789573	0.408054	0.559699	0.45711	0.554473	0.408683	0.439562	0.254594	0.290493	0.0592041	0.344542	0.475119	0.332032	0.238991
19.728	0.434613	0.277728	0.274125	0.508359	0.564718	0.496431					0.3921	0.3921	0.517305	0.578057			0.306016	1.12341	0.15109	0.47931	0.584809	0.455136	0.303454	0.341471	0.0538561	0.741883	0.345212	0.20253	0.850141	0.338204	0.244589	0.464343	0.392361	0.584383	0.0836238	0.742568	0.423631	0.53551	0.436946	0.570182	0.426603	0.42308	0.235363	0.30322	0.0294862	0.339598	0.449733	0.332502	0.228946
19.865	0.458617	0.257411	0.238935	0.519333	0.539826	0.485777					0.366744	0.366744	0.498918	0.598947			0.290357	1.07491	0.141405	0.462697	0.591582	0.437789	0.310632	0.320249	0.0453955	0.718785	0.326394	0.205886	0.829113	0.368272	0.239015	0.479857	0.387376	0.610904	0.0983464	0.712019	0.43757	0.501363	0.410323	0.574698	0.420811	0.403353	0.207861	0.321257	0.0178308	0.332928	0.404114	0.34294	0.239964
20.002	0.505712	0.264984	0.205074	0.520887	0.577297	0.482534					0.334543	0.334543	0.479399	0.64473			0.347717	1.03434	0.151012	0.459826	0.597314	0.415718	0.342346	0.307918	0.0699467	0.721342	0.339834	0.221944	0.801981	0.365007	0.222902	0.493825	0.367696	0.631482	0.0586559	0.667186	0.449214	0.504202	0.390759	0.569438	0.393785	0.385019	0.184679	0.32965	0.00907766	0.337872	0.385745	0.343141	0.253712
20.139	0.425259	0.253857	0.219444	0.525954	0.498877	0.437058					0.309458	0.309458	0.444515	0.689067			0.440325	1.01402	0.175941	0.468682	0.613057	0.391402	0.371362	0.304045	0.0516354	0.720871	0.376823	0.251928	0.796325	0.374227	0.189209	0.493556	0.326835	0.615924	0.0547455	0.623202	0.455141	0.491779	0.3532	0.564552	0.404516	0.379442	0.166669	0.360438	0.0172003	0.339716	0.391104	0.348479	0.244798
20.276	0.376023	0.230506	0.202527	0.52	0.541699	0.396488					0.315536	0.315536	0.386887	0.735934			0.493542	0.994848	0.191693	0.47687	0.657019	0.380873	0.403161	0.306972	0.0456118	0.727627	0.41422	0.283715	0.793237	0.364666	0.156469	0.48869	0.326685	0.573313	0.0531422	0.588756	0.448708	0.463321	0.297822	0.570881	0.433293	0.389907	0.162904	0.373555	0.0672108	0.346927	0.386412	0.360506	0.232211
20.413	0.492564	0.251306	0.258524	0.479631	0.554389	0.369832					0.342609	0.342609	0.344418	0.767345			0.521292	0.989065	0.153192	0.451825	0.654717	0.363737	0.390967	0.316449	0.0603157	0.743423	0.418325	0.305468	0.775902	0.361669	0.135205	0.507673	0.336839	0.533895	0.0526991	0.575773	0.441529	0.44327	0.27931	0.55601	0.461197	0.398003	0.149185	0.370279	0.118	0.365445	0.378493	0.366593	0.229053
20.55	0.553826	0.271741	0.256855	0.44205	0.573266	0.349406					0.354167	0.354167	0.313797	0.78441			0.516929	0.966895	0.127869	0.481839	0.658339	0.347624	0.348762	0.336227	0.0792928	0.769863	0.452457	0.3349	0.748729	0.37101	0.147452	0.524151	0.318602	0.461534	0.0644107	0.571212	0.4213	0.414125	0.309302	0.523592	0.470833	0.421042	0.147427	0.368133	0.137667	0.395193	0.369994	0.381537	0.213151
20.687	0.366399	0.272725	0.241348	0.478376	0.561299	0.276925					0.346957	0.346957	0.272217	0.797549			0.485007	0.916001	0.0636105	0.474013	0.650415	0.32975	0.3762	0.3698	0.0545323	0.807559	0.498109	0.341634	0.763892	0.388893	0.160919	0.552044	0.338631	0.40533	0.0623838	0.566464	0.457451	0.381553	0.348623	0.513228	0.438978	0.438441	0.16793	0.377197	0.121	0.395795	0.379623	0.382794	0.203395
20.824	0.470537	0.283585	0.281122	0.544669	0.646676	0.288617					0.329085	0.329085	0.23991	0.805762			0.495746	0.944215	0.0854951	0.4669	0.624427	0.323651	0.414907	0.403289	0.0533447	0.836636	0.530306	0.333622	0.793232	0.413061	0.152537	0.596875	0.359604	0.362051	0.054198	0.574885	0.488166	0.383132	0.361357	0.502697	0.386429	0.454682	0.193288	0.393466	0.0983011	0.394996	0.426402	0.371893	0.197457
20.961	0.47091	0.314731	0.291095	0.537006	0.576006	0.324158					0.322183	0.322183	0.246884	0.804929			0.477315	0.986312	0.0734724	0.474313	0.633647	0.319937	0.438484	0.439887	0.0422309	0.850437	0.530555	0.315999	0.817999	0.448563	0.145214	0.611626	0.354026	0.340163	0.0214355	0.582833	0.495829	0.394722	0.358954	0.50009	0.344535	0.465132	0.200411	0.40955	0.0684672	0.411743	0.473561	0.350193	0.197789
21.098	0.449903	0.345831	0.322255	0.522655	0.568387	0.304418					0.332221	0.332221	0.247034	0.82677			0.465382	0.966923	0.0625872	0.464705	0.654312	0.316665	0.520536	0.468802	0.0156581	0.853214	0.516341	0.283829	0.814057	0.484906	0.133279	0.61313	0.352477	0.309592	0.00433402	0.597167	0.485313	0.39541	0.390443	0.502483	0.323977	0.444518	0.172084	0.414304	0.0775913	0.429616	0.500957	0.339954	0.20983
21.235	0.451347	0.378628	0.319719	0.53445	0.621262	0.269848					0.339492	0.339492	0.266246	0.874013			0.416431	0.946133	0.0468023	0.468126	0.68093	0.326126	0.582487	0.492714	0.0266071	0.846421	0.503304	0.238873	0.753394	0.503222	0.141243	0.594435	0.348819	0.305521	0.00291324	0.59562	0.476127	0.392177	0.423177	0.494842	0.304851	0.430501	0.160722	0.443242	0.0409793	0.423636	0.514529	0.336606	0.223459
21.372	0.540246	0.412409	0.357722	0.555632	0.610536	0.310894					0.340665	0.340665	0.303816	0.907153			0.353514	0.9758	0.0351478	0.473944	0.720767	0.35469	0.62567	0.505165	0.0581293	0.843017	0.480737	0.21533	0.688249	0.527367	0.163207	0.597504	0.31051	0.29321	0.011666	0.564414	0.473563	0.406598	0.455984	0.498383	0.281957	0.430547	0.180649	0.456009	0.0235611	0.420002	0.491808	0.334609	0.220239
21.509	0.538375	0.414216	0.321208	0.562287	0.530781	0.323015					0.355636	0.355636	0.300449	0.913558			0.397074	0.945191	0.0596717	0.508877	0.72536	0.40946	0.677189	0.535801	0.0556787	0.827064	0.466905	0.215031	0.694043	0.537459	0.166871	0.584946	0.277006	0.28772	0.0161239	0.519306	0.487937	0.408022	0.463559	0.509797	0.248972	0.41742	0.219614	0.439884	0.0314936	0.410068	0.459462	0.334529	0.209629
21.646	0.48465	0.434296	0.305686	0.536071	0.418023	0.367747					0.372372	0.372372	0.280962	0.901545			0.406511	0.916524	0.109327	0.528521	0.715027	0.467881	0.714915	0.557545	0.0684846	0.810075	0.493999	0.212355	0.634214	0.520459	0.165405	0.584706	0.259439	0.292041	0.0256326	0.483745	0.503615	0.412455	0.487097	0.537221	0.23023	0.396392	0.240801	0.436521	0.0769839	0.407552	0.419226	0.354163	0.209228
21.783	0.398902	0.452168	0.344031	0.50055	0.435864	0.351876					0.387117	0.387117	0.291796	0.878061			0.413897	0.904349	0.0984933	0.552728	0.666382	0.549905	0.721086	0.569984	0.082176	0.796126	0.506247	0.215505	0.5829	0.517791	0.158883	0.622621	0.217062	0.288462	0.0416261	0.457024	0.511772	0.427707	0.484286	0.545799	0.227208	0.383452	0.240094	0.449225	0.124741	0.409513	0.402562	0.373847	0.21661
21.92	0.414085	0.455391	0.404558	0.456048	0.580512	0.353326					0.366911	0.366911	0.314268	0.835279			0.417432	0.925048	0.10943	0.61453	0.627558	0.626188	0.711157	0.561262	0.0816543	0.774535	0.489782	0.223758	0.589264	0.51149	0.156786	0.65666	0.205295	0.284404	0.0518714	0.451178	0.538239	0.430379	0.465844	0.532633	0.214172	0.372986	0.242994	0.465928	0.133939	0.415053	0.395439	0.400597	0.226416
22.057	0.460968	0.47597	0.382387	0.418096	0.562435	0.374485					0.324338	0.324338	0.310951	0.759603			0.448485	0.946283	0.127332	0.635506	0.56526	0.689613	0.706174	0.550952	0.0929534	0.749662	0.463773	0.215059	0.609544	0.495911	0.169023	0.676682	0.179243	0.264386	0.0589296	0.447534	0.535024	0.431731	0.515189	0.545183	0.172601	0.359424	0.265928	0.497531	0.115056	0.407645	0.367252	0.426329	0.225405
22.194	0.389069	0.538494	0.372726	0.377611	0.542919	0.378171					0.303468	0.303468	0.2935	0.672985			0.477853	0.909582	0.12703	0.654815	0.531441	0.721393	0.704671	0.527508	0.0824883	0.711208	0.435595	0.200246	0.670873	0.483641	0.149382	0.69108			0.0452824	0.46568	0.528573	0.451456	0.582987	0.552033	0.154312	0.352074	0.270699	0.502353			0.331234	0.442963	0.214683
22.331	0.530355	0.530491	0.396105	0.354418	0.53768	0.31759					0.304012	0.304012	0.268864	0.603254			0.501383	0.869415	0.0935458	0.674409	0.56878	0.757428	0.675871	0.512996	0.0627046	0.67667	0.430079	0.194691	0.696408	0.470345	0.164341	0.698584			0.0143186	0.456711	0.566322	0.461363	0.58555	0.550313	0.162667	0.355661	0.246069	0.510385			0.291115	0.442912	0.207834
22.468	0.512448	0.572226	0.448977	0.304635	0.577883	0.313204					0.312528	0.312528	0.232197	0.559604			0.596688	0.847651	0.127313	0.710002	0.613564	0.774499	0.662266	0.506417	0.0576831	0.63918	0.43066	0.173747	0.665253	0.476945	0.150783	0.716484			0.00777516	0.47933	0.573896	0.474222	0.536589	0.567965	0.159847	0.350814	0.239642	0.502597			0.259086	0.437887	0.201952
22.605	0.630271	0.58675			0.596528	0.314015					0.314529	0.314529	0.204337	0.544535			0.7827	0.838831	0.067693	0.709561	0.604885	0.770118	0.651894	0.498499	0.072696	0.61507	0.416288	0.140237	0.588516	0.481394	0.13402	0.712609			0.00355846	0.481891	0.584769	0.475409	0.50684	0.597319	0.146442	0.355548	0.220592	0.470984			0.27274	0.439431	0.206666
22.742	0.634333	0.661553			0.623777	0.314922					0.305151	0.305151	0.202262	0.55062			0.971241	0.810935	0.0720146	0.702016	0.566737	0.757295	0.569449	0.501219	0.0766568	0.588457	0.409265	0.122473	0.448695	0.465723	0.113981	0.674989			0.00327821	0.48374	0.608196	0.472096	0.477145	0.63457	0.145615	0.369831	0.192107	0.434032			0.323707	0.440264	0.212203
22.879	0.453697	0.679604			0.854354	0.292235							0.202676	0.574917			1.12226	0.791911	0.0730564	0.715784	0.542253	0.723805	0.50869	0.513533	0.0775252	0.580216	0.405853	0.123151	0.355132	0.457863	0.133143	0.682892			0	0.486063	0.573479	0.488398	0.467272	0.684554	0.151184	0.386698	0.175341	0.396482			0.358729	0.430347	0.221363
23.016	0.702331	0.734026			0.811647	0.256005							0.187385	0.603422			1.09466	0.756563	0.0677997	0.744248	0.481192	0.70115	0.468503	0.506542	0.098627	0.570243	0.395682	0.11381	0.365672	0.465765	0.145063	0.643514			0.00354542	0.480877	0.536385	0.514742	0.460479	0.723049	0.158177	0.414658	0.165115	0.373114			0.361951	0.408139	0.231476
23.153	0.965879	0.723124			0.789202	0.20036							0.170159	0.633729			1.07858	0.715888	0.0805145	0.772381	0.447448	0.682172	0.496844	0.498786	0.109576	0.562977	0.394164	0.1023	0.409711	0.491449	0.144831	0.630314			0.00932629	0.45192	0.547803	0.536281	0.46009	0.747847	0.167359	0.432807	0.152424	0.343278			0.360129	0.399895	0.231363
23.29	0.807325	0.695109			0.795023	0.158061							0.14928	0.673644			1.14928	0.699702	0.135114	0.769756	0.440679	0.655326	0.510504	0.492953	0.122368	0.560932	0.375219	0.102022	0.437779	0.496799	0.126702	0.629503			0.0201841	0.427482	0.565799	0.533648	0.523598	0.777596	0.179911	0.451282	0.125889	0.327909			0.347852	0.3931	0.224332
23.427	0.932736	0.7041			0.766435	0.10261							0.128633	0.724686			1.10658	0.708995	0.0611368	0.808712	0.441803	0.657317	0.520843	0.489748	0.111858	0.579922	0.375642	0.102747	0.439438	0.486962	0.121773	0.628175			0.0431447	0.387844	0.52427	0.531521	0.56068	0.816151	0.203173	0.467595	0.127591	0.348323			0.349146	0.391911	0.217056
23.564	0.463694	0.630704			0.835161	0.0524387							0.125858	0.787555			1.02713	0.697021	0.0363331	0.841179	0.445068	0.663136	0.572366	0.484078	0.109178	0.591961	0.368303	0.108414	0.428313	0.464337	0.113346	0.602461			0.0376049	0.356211	0.513996	0.535645	0.574536	0.836393	0.218319	0.499754	0.115878	0.387622			0.377034	0.40319	0.204613
23.701	0.398956	0.580531			0.770463	0.00572835							0.132332	0.843198			0.932033	0.691186	0.0675899	0.818491	0.415653	0.666803	0.597039	0.498475	0.127235	0.599181	0.370045	0.119604	0.435272	0.472783	0.110397	0.585661			0.0345223	0.320996	0.496773	0.529879	0.57038	0.848604	0.208082	0.575303	0.102407	0.453462			0.431158	0.418842	0.193709
23.838	0.207417	0.568748			0.66521	0.0249211							0.149158	0.861999			0.820686	0.672721	0.0592778	0.827384	0.360765	0.678381	0.633184	0.507382	0.126648	0.613095	0.384585	0.115184	0.461544	0.496146	0.104334	0.556158			0.040088	0.279233	0.47247	0.522832	0.536058	0.856824	0.181646	0.66389	0.0872463	0.504231			0.471335	0.42476	0.194895
23.975	0.300327	0.550346			0.602008	0.0306997							0.159682	0.86386			0.717717	0.636989	0.0678954	0.829795	0.322369	0.69006	0.614427	0.508856	0.129257	0.617195	0.400413	0.111165	0.513229	0.533375	0.110987	0.547019			0.0194281	0.256112	0.460912	0.511845	0.512374	0.853931	0.167904	0.773841	0.0788462	0.544392			0.481141	0.418001	0.200539
24.112	0.361055	0.564172			0.640506	0.0396674							0.127211	0.865513			0.704676	0.614767	0.108778	0.805788	0.336571	0.704758	0.552606	0.522325	0.124657	0.619437	0.416339	0.115487	0.560936	0.583483	0.129842	0.557489			0.0152245	0.253574	0.449766	0.498242	0.503196	0.861014	0.149661	0.876808	0.0855052	0.566516			0.460458	0.407184	0.219718
24.249	0.321765	0.603356			0.716458	0.0280318							0.0932445	0.849167			0.681877	0.60794	0.0499424	0.73667	0.396233	0.718094	0.515039	0.535832	0.135761	0.615478	0.430298	0.114919	0.577376	0.625115	0.123673	0.557677			0.00939146	0.256244	0.48109	0.482034	0.534534	0.859387	0.135666	0.965204	0.0981903	0.586368			0.425629	0.396937	0.229279
24.386	0.272634	0.633724			0.953763	0.0271106							0.0848849	0.799527			0.672428	0.568088	0.0518639	0.746149	0.37545	0.732307	0.462779	0.564407	0.158496	0.615401	0.442913	0.119774	0.526058	0.673764	0.13711	0.55512					0.489463	0.462512	0.584515	0.81959	0.115466	1.01472	0.0824018	0.59394			0.388697	0.384188	0.231583
24.523	0.307063	0.613126			0.908695	0.042178							0.0837494	0.739072			0.63731	0.529663	0.0597674	0.732726	0.405379	0.753381	0.413145	0.565474	0.169428	0.601566	0.439017	0.115755	0.468325	0.688509	0.125482	0.56494					0.492453	0.455246	0.675301	0.76415	0.0947003	1.04003	0.0638265	0.569856			0.334942	0.378829	0.240196
24.66	0.451508	0.639993			0.845759	0.027311							0.0907699	0.689578			0.611607	0.54149	0.0472735	0.729159	0.431105	0.781635	0.419934	0.550737	0.147005	0.583191	0.439501	0.0988782	0.428334	0.692867	0.094733	0.572071					0.491598	0.45141	0.733893	0.700605	0.0820171	1.07519	0.0492025	0.526382			0.267357	0.373648	0.251371
24.797	0.251679	0.592592			0.830759	0.0228674							0.116441	0.647361			0.606517	0.549506	0.0674647	0.715949	0.465694	0.81371	0.417835	0.548351	0.155531	0.576014	0.430069	0.105039	0.374583	0.687977	0.0483543	0.581664					0.513353	0.439236	0.719671	0.648731	0.0788841	1.06174	0.0244486	0.478024			0.2142	0.366663	0.28055
24.934	0.371531	0.624352			0.797178	0.00447321							0.1585	0.601379			0.670126	0.544287	0.0718306	0.694167	0.51289	0.829183	0.422399	0.550263	0.158672	0.551684	0.434265	0.106056	0.345213	0.652748	0.0352502	0.59736					0.530631	0.443775	0.688567	0.597107	0.0783998	1.03763	0.00764267	0.431176			0.17718	0.352485	0.295271
25.071	0.481335	0.606697			0.734	0											0.600607	0.532603	0.0194881	0.704585	0.550637	0.846663	0.436578	0.553049	0.15537	0.53459	0.420184	0.114553	0.298086	0.609497	0.0301648	0.588097					0.545587	0.454856	0.638663	0.533393	0.077078	1.04847	0.00154323	0.395998			0.180888	0.347561	0.326566
25.208	0.269107	0.595288			0.872458	0.00118239											0.577168	0.542299	0.0382326	0.72478	0.582951	0.867728	0.455365	0.552249	0.169531	0.52578	0.387544	0.136379	0.248395	0.546083	0.0280782	0.567154					0.564247	0.464328	0.584863	0.488692	0.0620942	1.06492	0	0.362645			0.210433	0.348436	0.372897
25.345	0.313102	0.63517			0.782669	0.0109027											0.614302	0.5323	0	0.723929	0.597251	0.878517	0.492757	0.547631	0.187726	0.521587	0.34591	0.166038	0.224747	0.492219	0.00624967	0.524759					0.555321	0.46991	0.542032	0.474969	0.0496633	1.0301					0.253375	0.342736	0.381435
25.482	0.350897	0.675418			0.833967	0.0278825											0.678424	0.519302	0.00427015	0.727104	0.56898	0.888246	0.513084	0.545796	0.224372	0.518174	0.305493	0.205139	0.233384	0.439788	0	0.486223					0.532851	0.470012	0.491665	0.478533	0.0418889	0.957771					0.280461	0.349563	0.349788
25.619	0.285892	0.687387			0.816681	0.0441063											0.646626	0.535937	0.0159174	0.753621	0.576295	0.898181	0.549411	0.556795	0.264554	0.515941	0.252951	0.239778	0.18149	0.422437	0.0243435	0.454155					0.530414	0.447709	0.456277	0.501808	0.0371667	0.899928					0.276595	0.355644	0.351571
25.756	0.234466	0.71798			0.791334	0.0368426											0.623063	0.534273	0.0292358	0.793045	0.561995	0.900731	0.579056	0.54146	0.277909	0.51271	0.227756	0.288007	0.145457	0.391625	0.0632023	0.430814					0.525388	0.435374	0.436012	0.512641	0.0374341	0.854054					0.233272	0.349827	0.354195
25.893	0.265792	0.762712			0.64719	0.0384771											0.562342	0.562793	0.0790346	0.807087	0.523682	0.892945	0.643361	0.536166	0.281791	0.528383	0.234876	0.337241	0.12302	0.358769	0.0885186	0.41528					0.541768	0.4535	0.436177	0.518095	0.0394975	0.78566					0.18596	0.354116	0.361264
26.03	0.179831	0.740928			0.694336	0.0593535											0.497108	0.598496	0.127862	0.844878	0.518983	0.869192	0.723177	0.542141	0.287863	0.546473	0.272751	0.368925	0.102073	0.33487	0.0808073	0.4064					0.576643	0.467458	0.419533	0.524995	0.0457282	0.727374					0.152912	0.372136	0.371516
26.167	0.215221	0.752901			0.79814	0.0586835											0.414939	0.631501	0.10601	0.890259	0.495988	0.876109	0.74942	0.543467	0.303477	0.548929	0.337909	0.39126	0.0900127	0.325947	0.0471901	0.413059					0.587168	0.459097	0.39519	0.509232	0.0499811	0.676255					0.143745	0.393638	0.369438
26.304	0.121563	0.676249			0.858312	0.0664015											0.373519	0.683859	0.0737264	0.918882	0.517965	0.863285	0.737726	0.541095	0.331995	0.551647	0.400378	0.406215	0.0708972	0.328288							0.54975	0.454169	0.387747	0.487499	0.0568373	0.632681					0.149239	0.4177	0.363656
26.441					0.980024	0.114223											0.333368	0.739212	0.0683151	0.915738	0.505649	0.842401	0.67171	0.559162	0.351951	0.546611	0.443998	0.411985	0.0585825	0.339556							0.558791	0.467776	0.386763	0.46467							0.158172	0.435599	0.350498
26.578					0.970286	0.116142											0.359013	0.811893	0.0230294	0.924007	0.471041	0.834393	0.635076	0.575805	0.379938	0.539711	0.483595	0.401087	0.0586283	0.361413							0.567202	0.460335	0.361357	0.444416							0.176108	0.449735	0.325531
26.715					0.878319	0.121097											0.422802	0.867113	0.0292101	0.913636	0.451181	0.811166	0.590672	0.586408	0.448275	0.530994	0.499846	0.37823	0.0748292	0.377501							0.58451	0.445542	0.314534	0.427839							0.188145	0.480991	0.311475
26.852					0.850484	0.136923											0.411972	0.882196	0.055593	0.887164	0.442149	0.778319	0.596184	0.621331	0.496392	0.510645	0.506008	0.333231	0.0886851	0.375756							0.602047	0.427751	0.267468	0.422646							0.198285	0.506041	0.320006
26.989					0.710701	0.154847											0.425507	0.907966	0.081247	0.894825	0.429038	0.752439	0.562197	0.649141	0.522711	0.490181	0.499408	0.287955	0.112679	0.385774							0.607665	0.428629	0.21723	0.427353							0.21403	0.519697	0.345877
27.126					0.710143	0.186175											0.476888	0.942756	0.0746136	0.896389	0.396292	0.716481	0.521069	0.656923	0.484458	0.479565	0.490577	0.247894	0.12154	0.406865							0.624564	0.428225	0.16983	0.422169							0.245848	0.538155	0.362457
27.263					0.727231	0.180996											0.499179	0.921714	0.00519781	0.874163	0.352891	0.695686	0.513381	0.686577	0.450688	0.462517	0.492706	0.213843	0.124215	0.437457							0.664733	0.439601	0.134469	0.415888							0.283753	0.559801	0.38296
27.4					0.747157	0.184796											0.498573	0.835066	0.0638277	0.90281	0.362175	0.686689	0.475477	0.704915	0.443607	0.445196	0.525188	0.193026	0.150813	0.485234							0.677069	0.431532	0.0868399	0.419371							0.305314	0.571677	0.383814
27.537					0.587526	0.209876											0.645653	0.797445	0.055431	0.926811	0.378114	0.657492	0.455835	0.710433	0.446133	0.427025	0.539809	0.182105	0.147288	0.517626							0.682878	0.413461	0.0648633	0.438875							0.311974	0.577579	0.347001
27.674					0.567267	0.198575											0.631149	0.741318	0.0779818	0.947701	0.367746	0.632117	0.471853	0.709018	0.426394	0.414704	0.555673	0.174164	0.143631	0.55626							0.690218	0.404802	0.0799919	0.444473							0.312062	0.593174	0.314588
27.811					0.524927	0.219911											0.65913	0.7028	0.0606619	0.954106	0.356282	0.629744	0.514154	0.694827	0.438863	0.402387	0.558963	0.169235	0.116051	0.58746							0.695053	0.392066	0.107471	0.43484							0.305156	0.593813	0.300714
27.948					0.541779	0.216364											0.596271	0.660045	0.0300383	0.962618	0.372818	0.626302	0.478827	0.711375	0.425326	0.389839	0.580363	0.164448	0.0823167	0.594934							0.718811	0.349198	0.132038	0.442076							0.280466	0.569758	0.325192
28.085					0.654201	0.166189											0.677561	0.624315	0.111874	0.965067	0.413426	0.617312	0.442738	0.713578	0.405309	0.366098	0.63397	0.164337	0.0672349	0.604626							0.726666	0.315363	0.162877	0.448207							0.243886	0.541997	0.368157
28.222					0.746357	0.14385											0.757623	0.588015	0.113177	1.00399	0.399938	0.606234	0.412301	0.716252	0.447132	0.353014	0.683137	0.165169	0.0581502	0.638329							0.724565	0.28961	0.181123	0.46269							0.198179	0.506372	0.370825
28.359					0.761519	0.16422											0.815231	0.562804	0.128539	0.931292	0.395157	0.599894	0.395524	0.730406	0.502629	0.345508	0.722377	0.151889	0.0406726	0.654902							0.737208	0.266777	0.19491	0.483038							0.151629	0.472606	0.339888
28.496					0.667581	0.144595											0.817082	0.54142	0.134399	0.889514	0.412801	0.575088	0.391307	0.733864	0.558139	0.350353	0.736891	0.12377	0.0211247	0.659771							0.744301	0.241134	0.209764	0.522215							0.106971	0.450658	0.316993
28.633					0.638646	0.110886											0.791346	0.49535	0.118305	0.856742	0.4325	0.573142	0.395439	0.753302	0.547636	0.345739	0.666106	0.108897	0.00709074	0.675964							0.750884	0.221321	0.202216	0.55301							0.0654525	0.435062	0.307005
28.77																	0.713619	0.468055	0.131447	0.800275	0.426402	0.554761	0.415977	0.791513	0.565282	0.350576	0.552832	0.0987312	0.00413542	0.722534							0.767379	0.212641	0.207059	0.593532							0.0383964	0.43011	0.280305
28.907																	0.613204	0.44145	0.131642	0.792358	0.417429	0.52465	0.428878	0.815412	0.534878	0.34129	0.459368	0.0907037	0	0.763646							0.791792	0.195792	0.232098	0.596715							0.021263	0.440484	0.248734
29.044																	0.594021	0.411577			0.431093	0.488323	0.466145	0.841359	0.478434	0.32176	0.409255	0.0927504	0.00346398	0.763645							0.777789	0.18061	0.259407	0.586489							0.0148841	0.458737	0.241483
29.181																	0.609823	0.382944			0.453652	0.470664	0.528773	0.847209	0.430207	0.309015	0.422012	0.101949	0.0126402	0.785196							0.808071	0.179312	0.279507	0.571073							0.0109185	0.477646	0.243178
29.318																	0.689505	0.329322			0.446124	0.449235	0.549496	0.824059	0.384352	0.310888	0.442816	0.113316	0.0232763	0.805143							0.83481	0.193305	0.272755	0.519967							0.0087395	0.488058	0.233943
29.455																	0.818623	0.306174			0.408562	0.431133	0.583265	0.823206	0.392019	0.316207	0.440351	0.127824	0.031771	0.80304							0.829609	0.189407	0.231567	0.467549							0.00945412	0.493228	0.242977
29.592																	0.828678	0.302513			0.34956	0.409567	0.551636	0.815404	0.387757	0.308708	0.45565	0.151292	0.0452709	0.799906							0.775743	0.192226	0.19036	0.428597							0.0107955	0.491956	0.252563
29.729																	0.874229	0.286851			0.31538	0.394894	0.464053	0.796345	0.404122	0.309697	0.461145	0.175086									0.674097	0.216439	0.148531	0.39432							0.0136657	0.49728	0.23921
29.866																	0.796161	0.273806			0.303385	0.398252	0.444185	0.770446	0.484451	0.321255	0.448602	0.191139									0.609408	0.245182	0.11203	0.34874							0.00952441	0.505102	0.223842
30.003																	0.729184	0.237642			0.260271	0.39787	0.426416	0.753846	0.550773	0.325215	0.449778	0.202054									0.521174	0.261196	0.0955417	0.33057							0.0108717	0.509219	0.199685
[truncated: 31 more columns]

## Sheet: FZD10
Figure 5E - FRIZZLED 10 Pixel intensity profile (Normalized Pixel Intensity measured from basal to apical side of progenitor cells )
	Cell 1		Cell 2		Cell 3		Cell 4		Cell 5		Cell 6		Cell 7		Cell 8		Cell 9		Cell 10		Cell 11		Cell 12		Cell 13		Cell 14		Cell 15		Cell 16		Cell 17		Cell 18		Cell 19		Cell 20		Cell 21		Cell 22		Cell 23		Cell 24		Cell 25
	Normalized Pixel Intensity	Normalized Pixel Intensity	Normalized Pixel Intensity	Normalized Pixel Intensity	Normalized Pixel Intensity	Normalized Pixel Intensity	Normalized Pixel Intensity	Normalized Pixel Intensity	Normalized Pixel Intensity	Normalized Pixel Intensity	Normalized Pixel Intensity	Normalized Pixel Intensity	Normalized Pixel Intensity	Normalized Pixel Intensity	Normalized Pixel Intensity	Normalized Pixel Intensity	Normalized Pixel Intensity	Normalized Pixel Intensity	Normalized Pixel Intensity	Normalized Pixel Intensity	Normalized Pixel Intensity	Normalized Pixel Intensity	Normalized Pixel Intensity	Normalized Pixel Intensity	Normalized Pixel Intensity	Normalized Pixel Intensity	Normalized Pixel Intensity	Normalized Pixel Intensity	Normalized Pixel Intensity	Normalized Pixel Intensity	Normalized Pixel Intensity	Normalized Pixel Intensity	Normalized Pixel Intensity	Normalized Pixel Intensity	Normalized Pixel Intensity	Normalized Pixel Intensity	Normalized Pixel Intensity	Normalized Pixel Intensity	Normalized Pixel Intensity	Normalized Pixel Intensity	Normalized Pixel Intensity	Normalized Pixel Intensity	Normalized Pixel Intensity	Normalized Pixel Intensity	Normalized Pixel Intensity	Normalized Pixel Intensity	Normalized Pixel Intensity	Normalized Pixel Intensity	Normalized Pixel Intensity
(basal to apical distance um)	MYC - Tag	DAPI	MYC - Tag	DAPI	MYC - Tag	DAPI	MYC - Tag	DAPI	MYC - Tag	DAPI	MYC - Tag	DAPI	MYC - Tag	DAPI	MYC - Tag	DAPI	MYC - Tag	DAPI	MYC - Tag	DAPI	MYC - Tag	DAPI	MYC - Tag	DAPI	MYC - Tag	DAPI	MYC - Tag	DAPI	MYC - Tag	DAPI	MYC - Tag	DAPI	MYC - Tag	DAPI	MYC - Tag	DAPI	MYC - Tag	DAPI	MYC - Tag	DAPI	MYC - Tag	DAPI	MYC - Tag	DAPI	MYC - Tag	DAPI	MYC - Tag	DAPI	MYC - Tag
0	0.152939	0.026566	0.0529675	0.2322	0.100208	0.0331712	0.0610051	0.150776	0.0542028	0.26199	0	0.325187	0.084975	0.235415	0.0430329	0.254539	0.197155	0.31905	0.0505789	0.190054	0.0893214	0.090003	0.0384428	0.193649	0.162984	0.497989	0.0517951	0.0548038	0.0253289	0.266835	0.0262977	0	0.0175292	0	0.0372924	0.00784661	0.164422	0.124775	0.130977	0.165092	0.240645	0.157718	0	0.0980553	0.0578324	0.0699361	0.100522	0.100522	0.103508
0.137	0.143962	0.0219998	0.0756354	0.180742	0.143674	0.0483253	0.0588416	0.133864	0.0581755	0.234003	0.00565229	0.317894	0.064831	0.19084	0.0605477	0.27676	0.18159	0.313667	0.0564552	0.158121	0.100679	0.101788	0	0.16735	0.187132	0.443576	0.0645399	0.041192	0	0.217888	0	0.0227214	0.00918547	0.00520034	0.0172718	0.0127862	0.154448	0.0986893	0.119976	0.218576	0.117237	0.157718	0.00096613	0.097144	0.0897032	0.0454157	0.0812778	0.0812778	0.14639
0.274	0.163986	0.0493198	0.0346645	0.132313	0.152514	0.0763816	0.058041	0.12891	0.065002	0.235314	0.0176421	0.29868	0.0200194	0.103468	0.0781576	0.287424	0.108954	0.292136	0.0475707	0.151884	0.0884528	0.081872	0.030373	0.198864	0.153908	0.396628	0.0744156	0.0233658	0.00377381	0.168355	0.0314384	0.0278395	0	0.0177	0.00592299	0.0252641	0.110263	0.059271	0.103977	0.101557	0.111067	0.208413	0.00775712	0.0811759	0.110283	0.0438432	0.0663477	0.0663477	0.175266
0.411	0.126008	0.0668507	0	0.106266	0.152371	0.0774319	0.0627636	0.122566	0.0524492	0.277601	0.0581418	0.274261	0	0.0600199	0.0720566	0.259082	0.0674477	0.28137	0.0586024	0.151927	0.0624448	0.053233	0.0904311	0.182258	0.166466	0.37429	0.0805197	0.0100645	0.0313504	0.119337	0.0841892	0.0398961	0.034566	0.0362614	0	0.0306195	0	0.0370444	0.0986417	0.108546	0.0617039	0.349233	0.0202045	0.0622603	0.110078	0.0351553	0.106958	0.106958	0.181115
0.548	0.0694137	0.0523485	0.0153968	0.0561239	0.156372	0.0346563	0.0854454	0.0802537	0.0496424	0.306779	0.121338	0.264561	0.0148873	0.0435189	0.0732207	0.237962	0.108954	0.302901	0.0598213	0.146783	0.122089	0.0391165	0.147386	0.128256	0.171695	0.405151	0.0845496	0.0114174	0.0309453	0.0778936	0.158791	0.0275218	0.0623765	0.0599606	0.0244664	0.0155376	0.109253	0.0679344	0.0795493	0.109569	0.0617039	0.230944	0.0316127	0.0361444	0.0854338	0.0546755	0.11615	0.11615	0.145426
0.685	0.0518677	0.0907117	0.0542752	0.0268426	0.191297	0.0137472	0.104083	0.0411783	0.0822986	0.302436	0.169992	0.271607	0.0148275	0.0266676	0.0603846	0.225714	0.15046	0.340581	0.0727565	0.132651	0.243485	0.0278739	0.163266	0.111007	0.17501	0.420749	0.124372	0.0101707	0.0175704	0.0405311	0.225332	0.0409247	0.0469703	0.0774047	0.0273347	0	0.144399	0.173734	0.0466587	0.111105	0.111067	0.0901245	0.0360445	0.027763	0.0778673	0.0840268	0.113441	0.113441	0.156283
0.822	0.056908	0.0217811	0.0736883	0.0359605	0.288285	0.0298833	0.10638	0.0437156	0.130145	0.29316	0.190481	0.294178	0.0523127	0.00420462	0.0589126	0.247269	0.186778	0.415941	0.100442	0.125277	0.331729	0.0431588	0.146471	0.104977	0.185251	0.425093	0.175587	0.00397976	0.0120374	0.0183348	0.312175	0.0737109	0.0543081	0.0776135	0.00927409	0.00890364	0.187016	0.157786	0.0217571	0.0448278	0.0431928	0.253475	0.0412908	0.0248287	0.0851117	0.0833227	0.11348	0.11348	0.120507
0.959	0.0184189	0	0.0659521	0.0690627	0.332236	0.0596348	0.0965563	0.0511535	0.163535	0.291393	0.200594	0.302778	0.0713595	0	0.0587269	0.263344	0.223096	0.432089	0.12097	0.113859	0.419512	0.0569081	0.119353	0.119294	0.19111	0.408893	0.205688	0	0.0106999	0.00898145	0.420169	0.105327	0.0606294	0.0973498	0.0114492	0.0118051	0.162326	0.114846	0.0785248	0.031694	0.0493631	0.0732262	0.0443689	0.00983339	0.0870678	0.0935691	0.12136	0.12136	0.100783
1.096	0.0165672	0.0118278	0.086487	0.112821	0.265891	0.0788487	0.100471	0.0377208	0.157178	0.288835	0.198378	0.282179	0.0808255	0.0169827	0.0598683	0.242622	0.176402	0.389027	0.152831	0.103152	0.488997	0.0396668	0.104951	0.146324	0.188824	0.378357	0.195757	0.00584852	0.0217771	0.00344382	0.502915	0.105912	0.0718002	0.123226	0.0207711	0.00971537	0.201141	0.228567	0.170867	0.0435747	0.0185112	0.0394295	0.0418525	0.00441275	0.0716478	0.109704	0.12185	0.12185	0.0907222
1.233	0	0.0401565	0.202175	0.149335	0.166409	0.082112	0.12919	0.0328363	0.129675	0.281373	0.160771	0.243804	0.114032	0.0486105	0.0605477	0.219483	0.140084	0.367495	0.162265	0.106432	0.505877	0.0107825	0.111846	0.162341	0.183456	0.386374	0.227966	0.0147412	0.0536436	0	0.56709	0.116063	0.126373	0.100462	0.0432058	0.0122436	0.309651	0.159986	0.131792	0	0.148089	0.107023	0.052025	0	0.0342661	0.117907	0.0853866	0.0853866	0.10484
1.37	0.05094	0.0553407	0.347029	0.175115	0.112571	0.0888293	0.144627	0.0125136	0.0944236	0.267997	0.142195	0.237137	0.159551	0.0711556	0.0781032	0.208984	0.21272	0.389027	0.147354	0.115615	0.415025	0.00772385	0.121411	0.158239	0.199006	0.3803	0.322199	0.0183325	0.0789948	0.0061999	0.595864	0.118302	0.167631	0.0705858	0.047862	0.0188333	0.238145	0.117124	0.194005	0.0697321	0.141919	0.0450623	0.0453126	0.013456	0.0220261	0.152536	0.0676056	0.0676056	0.147939
1.507	0.125131	0.0541262	0.486117	0.223166	0.0956795	0.0794642	0.174141	0	0.0766898	0.257405	0.116923	0.232147	0.193241	0.0555415	0.112961	0.217074	0.166025	0.367495	0.0758061	0.0987783	0.300519	0.0290068	0.128739	0.140317	0.235066	0.344478	0.400148	0.0177868	0.109085	0.0135868	0.55098	0.115599	0.239082	0.0688158	0.0649808	0.0353222	0.297239	0.218289	0.226625	0.103046	0.265327	0.135187	0.0237994	0.0442612	0.0460317	0.184077	0.0851814	0.0851814	0.176598
1.644	0.231373	0.0168685	0.588681	0.233968	0.0970566	0.0831868	0.25241	0.0177098	0.11345	0.260627	0.109118	0.203214	0.203106	0.0472199	0.16002	0.221764	0.160837	0.345964	0.117215	0.133835	0.253311	0.0611044	0.152704	0.120342	0.260275	0.329615	0.462877	0.0217989	0.148455	0.0145904	0.476167	0.131014	0.308113	0.0801719	0.14306	0.0486378	0.255213	0.398324	0.360958	0.0888167	0.394905	0.135187	0.0238387	0.0640219	0.0765379	0.189384	0.117844	0.117844	0.220873
1.781	0.3426	0.00494967	0.630303	0.256067	0.0844577	0.0671875	0.335068	0.0517802	0.169952	0.278947	0.14994	0.187428	0.268466	0.0620565	0.216908	0.205847	0.223096	0.31905	0.181082	0.134455	0.252748	0.0766816	0.13781	0.0616183	0.276682	0.334752	0.511013	0.0289477	0.179251	0.0186965	0.434997	0.149948	0.376393	0.105829	0.302589	0.0550287	0.345987	0.254765	0.408078	0.0788654	0.536824	0.10139	0.0596585	0.0657293	0.125656	0.177392	0.156173	0.156173	0.157919
1.918	0.421528	0.0116498	0.571174	0.267753	0.096275	0.0493512	0.419849	0.0690146	0.217958	0.284902	0.174573	0.159777	0.357361	0.105959	0.278335	0.218205	0.197155	0.324433	0.199219	0.144764	0.284867	0.0760373	0.123415	0.0297285	0.289241	0.358862	0.526515	0.0382	0.195384	0.0172955	0.414834	0.169311	0.462318	0.1402	0.48591	0.0611732	0.32298	0.318272	0.398319	0.103765	0.580017	0.0675934	0.126243	0.0585735	0.193362	0.138786	0.194711	0.194711	0.0668424
2.055	0.424961	0.0408003	0.383129	0.30711	0.112943	0.0520577	0.480921	0.0659385	0.259858	0.278445	0.207613	0.150177	0.396218	0.155363	0.300293	0.270688	0.191967	0.28137	0.233953	0.134719	0.328899	0.0424773	0.134561	0.104197	0.310036	0.399992	0.511946	0.0668104	0.196249	0.00998505	0.360262	0.185155	0.437011	0.155895	0.631838	0.0566815	0.320158	0.310785	0.59149	0.150826	0.246816	0.0619606	0.211633	0.0452241	0.244758	0.0719547	0.221025	0.221025	0.0520155
2.192	0.408994	0.0249148	0.230045	0.325371	0.129357	0.0462051	0.489373	0.0654886	0.299961	0.290642	0.263262	0.160325	0.412242	0.201367	0.297602	0.308618	0.259414	0.335198	0.280025	0.135333	0.415828	0.0485345	0.145138	0.154808	0.379012	0.422777	0.508202	0.0887175	0.199391	0.00867069	0.290496	0.195588	0.391979	0.180863	0.749514	0.0659041	0.277425	0.25058	0.539771	0.174215	0.290008	0.135187	0.298433	0.0328276	0.324658	0.0276618	0.228655	0.228655	0.086846
2.329	0.3797	0.0105112	0.153433	0.386469	0.0870321	0.0493366	0.441963	0.0853527	0.337821	0.338659	0.318317	0.171001	0.446735	0.293086	0.299355	0.325452	0.290544	0.367495	0.300621	0.128638	0.390036	0.060788	0.163336	0.141613	0.456214	0.406923	0.503263	0.0969633	0.237323	0.0153087	0.258619	0.201729	0.40127	0.233869	0.752655	0.106333	0.288304	0.291393	0.603173	0.121654	0.364053	0.123921	0.383003	0.03377	0.450355	0.0454395	0.223052	0.223052	0.13236
2.466	0.37088	0.00481105	0.129608	0.443933	0.147055	0.0745252	0.389663	0.120918	0.383336	0.330683	0.371101	0.188511	0.404427	0.346109	0.261735	0.363119	0.36318	0.351347	0.343576	0.119396	0.361134	0.0527811	0.185634	0.160087	0.495163	0.412231	0.464965	0.114807	0.283591	0.028493	0.248243	0.204805	0.379474	0.294101	0.678993	0.149535	0.23054	0.296271	0.443891	0.132528	0.351712	0.152085	0.477431	0.0430938	0.587361	0.0752818	0.25205	0.25205	0.166549
2.603	0.385157	0.00747438	0.077257	0.460236	0.28545	0.0646178	0.354559	0.146935	0.451375	0.30798	0.394111	0.215469	0.345581	0.38999	0.161057	0.403507	0.446192	0.302901	0.373066	0.0913188	0.295376	0.0442501	0.26272	0.172708	0.496262	0.444071	0.405823	0.174171	0.327567	0.0406891	0.233548	0.199415	0.345003	0.331287	0.589034	0.171389	0.311235	0.395399	0.35123	0.130179	0.364053	0.185882	0.541965	0.0386566	0.671635	0.0764367	0.315493	0.315493	0.248729
2.74	0.405927	0.0202435	0.0381635	0.438293	0.335709	0.0698744	0.364842	0.169146	0.519391	0.329309	0.381307	0.231063	0.281987	0.402483	0.0595241	0.431378	0.39431	0.302901	0.327544	0.0618792	0.216552	0.0537555	0.315076	0.147557	0.496742	0.405662	0.314646	0.252311	0.373463	0.0511021	0.228335	0.197156	0.249855	0.322672	0.494343	0.179484	0.308333	0.338699	0.383181	0.145405	0.567676	0.321069	0.533573	0.0237136	0.629181	0.0657983	0.423134	0.423134	0.314557
2.877	0.46091	0.029955	0.0345657	0.446676	0.415819	0.0768066	0.356854	0.186049	0.575817	0.352347	0.330413	0.252779	0.216577	0.415064	0.0368051	0.421968	0.33205	0.302901	0.287172	0.0525022	0.162508	0.0906779	0.320807	0.114884	0.515559	0.361098	0.222685	0.310063	0.380706	0.0576025	0.225298	0.204094	0.181634	0.314772	0.424175	0.184299	0.268908	0.40607	0.269721	0.16149	0.302349	0.377397	0.457968	0.0332141	0.490764	0.0645456	0.499942	0.499942	0.336253
3.014	0.487635	0.0348275	0.0430052	0.435469	0.44673	0.0840564	0.327239	0.193504	0.590946	0.340744	0.253843	0.28242	0.171272	0.432474	0.0285119	0.416317	0.243849	0.28137	0.286	0.0603711	0.197266	0.082989	0.299912	0.0897548	0.600026	0.386731	0.173092	0.342402	0.396822	0.0576891	0.218131	0.221773	0.155248	0.308856	0.360518	0.194491	0.230395	0.473583	0.209731	0.229345	0.357883	0.433724	0.405836	0.060357	0.343182	0.0803578	0.474157	0.474157	0.403126
3.151	0.44243	0.0431458	0.0461438	0.41297	0.391564	0.0954538	0.328788	0.198427	0.558991	0.344914	0.193489	0.31312	0.139442	0.436908	0	0.399202	0.166025	0.292136	0.292613	0.0861321	0.203095	0.0836514	0.272544	0.0614172	0.679093	0.406098	0.146366	0.383253	0.4287	0.0615303	0.202659	0.24341	0.138814	0.320928	0.304989	0.199256	0.13857	0.401964	0.262174	0.145331	0.413416	0.366131	0.376027	0.0727779	0.229186	0.098323	0.418197	0.418197	0.522563
3.288	0.372679	0.0483135	0.0379194	0.371604	0.406954	0.0885215	0.336253	0.207636	0.529696	0.37185	0.15126	0.321619	0.132076	0.465651	0.0110334	0.365883	0.15046	0.265222	0.259689	0.110778	0.204249	0.106794	0.283052	0.0480553	0.658368	0.416884	0.124638	0.371115	0.401145	0.0800842	0.17172	0.260605	0.132038	0.325643	0.287387	0.206168	0.300043	0.473302	0.229429	0.241609	0.46278	0.197147	0.327462	0.071782	0.150856	0.108767	0.393055	0.393055	0.697169
3.425	0.369461	0.0473333	0.0244233	0.338956	0.452716	0.103715	0.33388	0.232216	0.51657	0.392521	0.117838	0.307267	0.139821	0.496359	0.0546777	0.384197	0.243849	0.286753	0.206174	0.126564	0.223917	0.141588	0.288002	0.0465157	0.559703	0.38844	0.108862	0.336914	0.321185	0.111033	0.13452	0.297758	0.170273	0.372905	0.274929	0.209178	0.268891	0.49415	0.204915	0.208494	0.456609	0.44499	0.286238	0.0715841	0.120619	0.120216	0.378575	0.378575	0.772237
3.562	0.424589	0.0550443	0.0211335	0.323209	0.62281	0.135044	0.336128	0.256488	0.445099	0.391562	0.0894663	0.319982	0.131562	0.492735	0.0602306	0.446689	0.300921	0.249073	0.167965	0.169991	0.21218	0.17468	0.280246	0.0458178	0.475537	0.347161	0.115173	0.327709	0.222555	0.146806	0.130933	0.344855	0.229441	0.420549	0.25781	0.222069	0.216113	0.377256	0.335299	0.306255	0.290008	0.259108	0.277824	0.0743457	0.116262	0.131538	0.292068	0.292068	0.796285
3.699	0.429289	0.0829873	0.0236386	0.276372	0.695196	0.161435	0.309188	0.268068	0.336496	0.371683	0.100371	0.346837	0.12463	0.461868	0.0359491	0.516068	0.285356	0.254456	0.142261	0.208603	0.224592	0.186447	0.25784	0.0546281	0.451951	0.332803	0.13044	0.361958	0.161047	0.18915	0.153284	0.412878	0.277073	0.439899	0.241318	0.249436	0.240595	0.445584	0.325941	0.325612	0.185112	0.557646	0.296445	0.0967238	0.0988334	0.161972	0.209156	0.209156	0.765511
3.836	0.415126	0.136982	0.029294	0.238446	0.581465	0.114262	0.296493	0.277218	0.25367	0.394588	0.173285	0.359734	0.145681	0.398815	0.0413706	0.525717	0.228285	0.24369	0.10622	0.220463	0.256817	0.185537	0.314102	0.0676466	0.438637	0.32346	0.113756	0.391091	0.14341	0.211556	0.160606	0.477033	0.277121	0.449495	0.195932	0.278927	0.171127	0.363794	0.246937	0.375615	0.265327	0.44499	0.332865	0.125436	0.0521224	0.204069	0.195124	0.195124	0.695508
3.973	0.396582	0.223776	0.0361641	0.223125	0.520232	0.0942715	0.301807	0.299271	0.206482	0.455906	0.212543	0.419321	0.178359	0.383907	0.0720476	0.55862	0.171213	0.324433	0.0639342	0.244743	0.245444	0.210969	0.40932	0.0702037	0.418748	0.324759	0.0719299	0.394438	0.149787	0.234796	0.132565	0.528215	0.259237	0.432861	0.141153	0.335196	0.117595	0.360852	0.27687	0.397001	0.333201	0.625239	0.358164	0.166325	0.00583888	0.208305	0.202293	0.202293	0.596604
4.11	0.310537	0.299341	0.0368965	0.236698	0.491275	0.122279	0.302045	0.353235	0.195363	0.420942	0.216461	0.465793	0.183027	0.39962	0.0891593	0.60505	0.171213	0.367495	0.0532655	0.286037	0.203676	0.25058	0.515745	0.0567111	0.391841	0.34468	0.0728662	0.376253	0.161258	0.254211	0.0729695	0.548354	0.264303	0.432067	0.134885	0.398622	0.185089	0.436325	0.278034	0.376511	0.271497	0.636505	0.36964	0.217242	0	0.185857	0.167645	0.167645	0.510187
4.247	0.234296	0.362888	0.0592564	0.294163	0.34945	0.122401	0.291295	0.412852	0.196924	0.410835	0.205975	0.487928	0.18168	0.390937	0.0937746	0.648899	0.186778	0.329816	0.0825227	0.32146	0.161043	0.253489	0.580526	0.0135683	0.368157	0.368226	0.0890237	0.35973	0.157906	0.250227	0.0341864	0.545909	0.281774	0.452539	0.161694	0.426326	0.187858	0.522565	0.162007	0.47874	0.117237	0.58581	0.326838	0.258986	0.0278298	0.162562	0.108095	0.108095	0.462036
4.384	0.190816	0.362326	0.0947172	0.344418	0.305636	0.138405	0.275613	0.422223	0.203671	0.390915	0.162095	0.509122	0.186782	0.363683	0.0754944	0.690283	0.254226	0.367495	0.125208	0.326367	0.169277	0.232277	0.516195	0.0195442	0.36033	0.339639	0.0932523	0.390942	0.0928025	0.306714	0.0290401	0.509658	0.32192	0.427822	0.167875	0.448686	0.194018	0.439931	0.172425	0.399067	0.234475	0.912511	0.24483	0.288644	0.0459438	0.14206	0.0842022	0.0842022	0.453163
4.521	0.149329	0.321297	0.0957983	0.352893	0.320176	0.136612	0.27159	0.396029	0.191203	0.371856	0.105034	0.516668	0.182598	0.328585	0.0459316	0.646685	0.166025	0.35673	0.17434	0.297935	0.167164	0.274961	0.424621	0.0299613	0.361581	0.265119	0.0853846	0.42286	0.0480884	0.334718	0.0182146	0.448861	0.341604	0.404932	0.145632	0.474712	0.167847	0.33147	0.24471	0.40939	0.0431928	0.726629	0.203213	0.298899	0.0384007	0.108258	0.0739134	0.0739134	0.495672
4.658	0.171908	0.30405	0.0764375	0.324411	0.402382	0.145098	0.248252	0.353787	0.189858	0.391169	0.09797	0.536183	0.182394	0.318845	0.0322214	0.532284	0.160837	0.345964	0.206553	0.266551	0.130641	0.325614	0.335284	0.0504277	0.35217	0.209605	0.0949894	0.418991	0.0524005	0.379748	0.0152668	0.402112	0.307975	0.411286	0.118393	0.480158	0.127046	0.517226	0.151026	0.410837	0.0802151	0.737895	0.2137	0.293454	0.0291475	0.0996584	0.0922269	0.0922269	0.552111
4.795	0.200107	0.271793	0.0466262	0.291486	0.399033	0.147687	0.2017	0.348425	0.210408	0.424505	0.0870196	0.568951	0.194209	0.32697	0.0242318	0.461126	0.124519	0.378261	0.221988	0.266545	0.111457	0.357603	0.249396	0.0421698	0.317463	0.16609	0.116632	0.362791	0.0700597	0.404099	0.041731	0.362146	0.29115	0.435696	0.0965796	0.44014	0.148352	0.495911	0.202191	0.445478	0.178941	0.895613	0.211178	0.270743	0.0309162	0.10982	0.125751	0.125751	0.576364
4.932	0.154548	0.258565	0.030346	0.280854	0.280984	0.167282	0.155452	0.36321	0.257234	0.448848	0.0759909	0.518827	0.212582	0.340109	0.025115	0.421118	0.0985774	0.39441	0.208975	0.273127	0.103645	0.37243	0.211067	0.00490987	0.280283	0.121244	0.142375	0.344852	0.0975697	0.397329	0.0745073	0.320258	0.300521	0.457766	0.0748238	0.401966	0.107865	0.432691	0.224196	0.41996	0	0.574544	0.202337	0.247748	0.0502834	0.0941992	0.12902	0.12902	0.543014
5.069	0.123054	0.257782	0.0541938	0.290256	0.202357	0.197004	0.132304	0.350958	0.279265	0.493342	0.0782537	0.418944	0.205086	0.337027	0.0396948	0.363889	0.0622594	0.415941	0.184064	0.287707	0.0956804	0.369356	0.271819	0	0.276041	0.090735	0.150699	0.405035	0.114113	0.387863	0.107767	0.308857	0.259655	0.461645	0.0691589	0.380661	0.196375	0.421603	0.151981	0.476118	0.215964	0.557646	0.215059	0.225801	0.0824236	0.0883981	0.0987943	0.0987943	0.532406
5.206	0.129313	0.26696	0.119722	0.322571	0.192823	0.292058	0.125919	0.357607	0.256679	0.519563	0.0861227	0.351291	0.150115	0.34219	0.0442603	0.347563	0.0622594	0.39441	0.176985	0.266637	0.0783697	0.379339	0.313495	0.024707	0.296846	0.0780117	0.15166	0.462582	0.123986	0.382967	0.108572	0.313309	0.199343	0.45244	0.0566676	0.355556	0.199463	0.356745	0.146145	0.455901	0.0987263	0.6872	0.241684	0.206935	0.106581	0.103935	0.0541547	0.0541547	0.48039
5.343	0.126519	0.270419	0.141303	0.31269	0.123315	0.388557	0.106198	0.383784	0.213619	0.519101	0.104473	0.332008	0.105009	0.374879	0.0461445	0.341993	0.0207531	0.421324	0.204546	0.268242	0.075245	0.425182	0.319664	0.0365277	0.310704	0.0755735	0.12515	0.461627	0.14235	0.395275	0.0651474	0.290497	0.21179	0.459515	0.0553721	0.320888	0.257222	0.331487	0.221726	0.579825	0.246816	0.597075	0.261085	0.226542	0.116086	0.117613	0.0430094	0.0430094	0.361346
5.48	0.117102	0.273909	0.105447	0.284836	0.139375	0.507265	0.117138	0.388614	0.153723	0.482918	0.12103	0.325788	0.0751	0.39086	0.0668978	0.308581	0.0207531	0.464386	0.253356	0.29627	0.0952986	0.455579	0.289112	0.0269873	0.311227	0.0828561	0.0932558	0.444519	0.153627	0.415755	0.0259535	0.268502	0.229859	0.493604	0.0676674	0.290833	0.29087	0.452836	0.113432	0.684801	0.246816	0.580177	0.24811	0.265704	0.11546	0.127289	0.0821024	0.0821024	0.251771
5.617	0.0869498	0.272598	0.0835401	0.242584	0.109246	0.627252	0.137271	0.404324	0.0972068	0.423437	0.138856	0.314122	0.088556	0.368737	0.0993049	0.300015	0.0259414	0.469769	0.240732	0.310241	0.112401	0.434183	0.263668	0.0132011	0.288923	0.110965	0.0830303	0.419981	0.158261	0.424956	0.00754455	0.307142	0.248278	0.530367	0.0679877	0.289017	0.269831	0.489205	0.118231	0.516395	0.135749	0.557646	0.2132	0.264889	0.10821	0.121364	0.117156	0.117156	0.21719
5.754	0.0668367	0.264226	0.0677481	0.218862	0.0890544	0.648972	0.133468	0.445883	0.0837607	0.415732	0.154705	0.343191	0.129717	0.363837	0.109473	0.31477	0.072636	0.432089	0.167711	0.342212	0.148412	0.423203	0.244836	0.0170528	0.290648	0.121862	0.0849897	0.391848	0.166975	0.432567	0.00606229	0.343468	0.265897	0.565976	0.055917	0.300316	0.156811	0.430767	0.122373	0.46709	0.215964	0.40556	0.180812	0.244039	0.0818145	0.104411	0.132349	0.132349	0.257184
5.891	0.0895503	0.247967	0.0790647	0.189311	0.0374492	0.6116	0.0914581	0.433531	0.0867085	0.440699	0.136147	0.3684	0.12444	0.37771	0.119786	0.321123	0.114142	0.39441	0.102952	0.39033	0.209496	0.421349	0.217496	0.0286264	0.268107	0.145424	0.0914365	0.374129	0.178385	0.448303	0.023966	0.366139	0.241067	0.590928	0.0403806	0.30926	0.14455	0.497216	0.145936	0.632077	0.277668	0.309803	0.156979	0.25328	0.0658499	0.090246	0.093931	0.093931	0.261446
6.028	0.0980184	0.233215	0.086673	0.202649	0.0269657	0.574848	0.0801503	0.411821	0.0695436	0.458297	0.153431	0.353978	0.0950595	0.373861	0.154531	0.328583	0.140084	0.39441	0.0866926	0.420255	0.223366	0.441817	0.18279	0.0367901	0.207404	0.164195	0.109535	0.374489	0.194007	0.445359	0.0320491	0.385734	0.197151	0.597146	0.0228315	0.339314	0.0727247	0.538564	0.147587	0.670388	0.0246816	0.219679	0.122412	0.295265	0.0668162	0.0933437	0.0578997	0.0578997	0.239831
6.165	0.0965377	0.245508	0.0763329	0.249008	0	0.621361	0.0745894	0.395095	0.0820071	0.433197	0.209586	0.325908	0.0904312	0.347358	0.189017	0.339528	0.134895	0.469769	0.0951726	0.425102	0.185911	0.431251	0.174834	0.0426418	0.2108	0.191052	0.117359	0.380561	0.205972	0.436148	0.0320657	0.400721	0.172274	0.587242	0.0134666	0.376919	0.0954646	0.630891	0.145133	0.502008	0.215964	0.259108	0.0889626	0.325635	0.0557475	0.115489	0.0512646	0.0512646	0.238705
6.302	0.0814912	0.253325	0.089335	0.27316	0.0030272	0.625122	0.0692487	0.3933	0.131499	0.402582	0.254441	0.335177	0.0968699	0.342584	0.19582	0.340549	0.119331	0.502066	0.0923044	0.434732	0.149666	0.399632	0.242529	0.0978397	0.229535	0.229414	0.0952939	0.396508	0.209707	0.503297	0.0613723	0.412833	0.134516	0.557282	0.0143557	0.37279	0.10264	0.70737	0.169025	0.518414	0.172771	0.377397	0.0756839	0.322858	0.0274199	0.134818	0.0474327	0.0474327	0.211328
6.439	0.0758714	0.288088	0.105824	0.269263	0.0870879	0.582444	0.0807512	0.391557	0.159482	0.414236	0.253847	0.357022	0.116765	0.372454	0.18769	0.332582	0.171213	0.475152	0.0815735	0.449996	0.138972	0.408785	0.323531	0.187452	0.18289	0.27616	0.0907556	0.433848	0.209397	0.578735	0.0943541	0.400539	0.11075	0.533468	0.0258623	0.353135	0.0671689	0.646845	0.127451	0.551906	0.0987263	0.484419	0.0962085	0.289686	0.0021786	0.136535	0.0434517	0.0434517	0.0914502
6.576	0.112078	0.332287	0.0605699	0.23703	0.0430136	0.601561	0.0944795	0.390028	0.150921	0.434872	0.22055	0.338871	0.164	0.367472	0.176348	0.329054	0.155649	0.459004	0.0641987	0.437269	0.110038	0.425816	0.301352	0.217973	0.137538	0.241541	0.0965626	0.459349	0.16824	0.551338	0.125215	0.379714	0.10509	0.539019	0.0384062	0.362942	0.114866	0.591405	0.126086	0.383857	0.178941	0.321069	0.0926417	0.256978	0.0141199	0.12935	0.0405548	0.0405548	0.0544421
6.713	0.164462	0.325548	0.0283582	0.233962	0.0281939	0.719379	0.113463	0.380035	0.126694	0.444702	0.209057	0.331141	0.167481	0.342523	0.151478	0.361395	0.145272	0.421324	0.0571191	0.416372	0.0539293	0.40992	0.218704	0.238708	0.131841	0.249404	0.0475838	0.488084	0.124503	0.509294	0.15964	0.360593	0.111274	0.562723	0.0350312	0.397671	0.11489	0.674984	0.178335	0.413994	0.0925559	0.3436	0.0733472	0.250903	0.0420786	0.135443	0.0323911	0.0323911	0.0381717
6.85	0.175072	0.308253	0.0393027	0.27466	0.0265625	0.767646	0.143049	0.344156	0.0881424	0.425891	0.201459	0.341303	0.137243	0.331804	0.127228	0.405433	0.140084	0.389027	0.0822218	0.412865	0.0268609	0.380145	0.194722	0.256605	0.128008	0.2931	0.0316058	0.488292	0.103119	0.515687	0.178965	0.335713	0.120539	0.58176	0.0255229	0.432129	0.00274597	0.62918	0.199136	0.352556	0.197453	0.298538	0.0615683	0.230479	0.0332529	0.162051	0.0509692	0.0509692	0.0847989
6.987	0.172137	0.312798	0.0615638	0.325345	0.0502404	0.760328	0.139628	0.298743	0.0525949	0.408103	0.174214	0.355364	0.11841	0.312149	0.136391	0.428633	0.191967	0.367495	0.11303	0.39583	0.0294494	0.410701	0.194061	0.244111	0.117778	0.303369	0.0422696	0.475026	0.0585385	0.569662	0.169872	0.321972	0.151674	0.599888	0.0254368	0.464622	0.0452128	0.513896	0.165996	0.336282	0.407246	0.298538	0.0561759	0.228505	0.0238065	0.181508	0.0798081	0.0798081	0.143341
7.124	0.190436	0.316904	0.0858709	0.331391	0.0704755	0.748847	0.134548	0.317365	0.054908	0.413081	0.148174	0.36099	0.0934386	0.288487	0.154173	0.44222	0.243849	0.345964	0.0996485	0.374652	0.067426	0.40359	0.200577	0.219967	0.103343	0.309577	0.0448405	0.46126	0.0153172	0.589663	0.138456	0.334286	0.190894	0.602274	0.0356479	0.477592	0.11709	0.505924	0.127807	0.359917	0.185112	0.259108	0.0700781	0.22415	0.0334052	0.168692	0.0918273	0.0918273	0.149358
7.261	0.220155	0.311592	0.0915727	0.311195	0.0901275	0.754456	0.14436	0.339459	0.0896422	0.41646	0.132992	0.380085	0.0983612	0.295605	0.14256	0.452731	0.202343	0.383644	0.0665015	0.359054	0.0779285	0.351997	0.157877	0.225272	0.100611	0.359938	0.0459846	0.428794	0.0137189	0.547782	0.111508	0.349524	0.201816	0.6115	0.0460358	0.454271	0.141461	0.517991	0.132009	0.308405	0.271497	0.416826	0.0742684	0.221628	0.0320933	0.151234	0.0868362	0.0868362	0.17969
7.398	0.237213	0.304526	0.0880795	0.380614	0.0969325	0.739189	0.145671	0.33029	0.0989322	0.415801	0.150041	0.410314	0.129203	0.311985	0.117902	0.485029	0.15046	0.399792	0.0399258	0.340893	0.0547253	0.347722	0.120317	0.231644	0.113477	0.378197	0.035828	0.378936	0.0538823	0.516777	0.117671	0.349292	0.199232	0.622971	0.0449602	0.412938	0.146082	0.380283	0.0704101	0.226105	0.228305	0.30417	0.0441443	0.18358	0.0119354	0.155565	0.0693741	0.0693741	0.248474
7.535	0.199001	0.297854	0.0727234	0.476115	0.0765547	0.73192	0.134547	0.346803	0.0745271	0.431932	0.172908	0.422926	0.131986	0.333079	0.105121	0.518893	0.15046	0.39441	0.015155	0.347124	0.0196541	0.365199	0.114673	0.235098	0.121152	0.333905	0.0298062	0.355294	0.0998229	0.546264	0.140959	0.348385	0.197369	0.599172	0.0371012	0.380683	0.145624	0.491765	0.112021	0.228464	0.16043	0.309803	0.0759535	0.232946	0.0101961	0.171762	0.0517511	0.0517511	0.313325
7.672	0.145623	0.3148	0.0537172	0.46762	0.0924103	0.740826	0.0967143	0.380772	0.0374375	0.438614	0.1711	0.424744	0.0978325	0.364176	0.116158	0.507391	0.160837	0.421324	0.0129663	0.380991	0.0117188	0.406118	0.121736	0.255273	0.122564	0.363994	0.0206664	0.368778	0.123237	0.569341	0.156048	0.346116	0.172475	0.558624	0.040457	0.352	0.132114	0.464053	0.102972	0.19256	0.240645	0.236577	0.0789081	0.252556	0.0323803	0.185915	0.0490448	0.0490448	0.35266
7.809	0.11307	0.377964	0.0880795	0.392175	0.10468	0.777675	0.062338	0.410092	0.0168358	0.451251	0.152456	0.435736	0.0611204	0.394468	0.107661	0.454792	0.140084	0.426707	0.024999	0.397731	0.0285179	0.41723	0.126865	0.282668	0.107111	0.414738	0.010262	0.395846	0.115468	0.532555	0.170172	0.331644	0.172618	0.522431	0.0411072	0.313694	0.122205	0.501294	0.133114	0.264709	0.104897	0.366131	0.076723	0.233241	0.0451415	0.194226	0.055907	0.055907	0.372564
7.946	0.0913165	0.477003	0.0867659	0.350719	0.056605	0.79259	0.0467622	0.433661	0.0150822	0.471927	0.131879	0.466991	0.0414801	0.441803	0.104631	0.400107	0.124519	0.464386	0.019605	0.398312	0.0183423	0.426484	0.153051	0.250467	0.0946547	0.403319	0.00597201	0.428089	0.0891341	0.501927	0.176456	0.319875	0.201752	0.49291	0.0456391	0.293891	0.108718	0.609654	0.0880617	0.192822	0.197453	0.377397	0.080346	0.222662	0.0428926	0.194394	0.0703819	0.0703819	0.433545
8.083	0.101301	0.554499	0.0877599	0.363192	0.0372942	0.820241	0.0613361	0.437099	0.00569343	0.478245	0.124212	0.504195	0.0462181	0.467436	0.0924838	0.375764	0.114142	0.432089	0.0224317	0.410027	0	0.413731	0.163618	0.203363	0.0725016	0.36137	0.0176775	0.401041	0.0858986	0.50805	0.175329	0.322426	0.223432	0.496325	0.0636757	0.300267	0.142396	0.565876	0.173886	0.228863	0.117237	0.501318	0.0844128	0.234249	0.0434783	0.182152	0.0798114	0.0798114	0.384106
8.22	0.115636	0.536764	0.107086	0.32606	0.0454018	0.837696	0.10126	0.451116	0	0.503374	0.123334	0.493807	0.0412157	0.485316	0.0572322	0.351226	0.0830126	0.389027	0.0105079	0.436418	0.00111076	0.378225	0.208154	0.2545	0.0255596	0.377127	0.0286366	0.362998	0.113153	0.537919	0.162366	0.335153	0.221314	0.507968	0.0875637	0.315432	0.127499	0.726295	0.180877	0.177329	0.16043	0.214046	0.0855643	0.250704	0.0474841	0.17095	0.079511	0.079511	0.320337
8.357	0.0895411	0.487923	0.100901	0.310462	0.0670823	0.872177	0.0908534	0.457027	0.0102303	0.52915	0.130127	0.433258	0.0390612	0.494952	0.0503975	0.336342	0.0778243	0.432089	0.0252428	0.437985	0.0113076	0.391094	0.21885	0.319463	0.0378436	0.450193	0.0523642	0.369523	0.143533	0.547298	0.130439	0.364712	0.239786	0.495646	0.128661	0.333245	0.130895	0.666585	0.182262	0.141409	0.111067	0.208413	0.0878504	0.272291	0.0496509	0.17	0.0763887	0.0763887	0.265833
8.494	0.0622762	0.44245	0.0940604	0.271198	0.0830992	0.924132	0.0926409	0.411743	0.0387445	0.540851	0.159681	0.394268	0.0629557	0.505474	0.0685736	0.335303	0.0830126	0.475152	0.0319541	0.458333	0.0368623	0.422409	0.178355	0.373231	0.0762585	0.441553	0.035465	0.377961	0.169428	0.514795	0.0964304	0.412838	0.244731	0.468913	0.175634	0.326005	0.163237	0.54388	0.18732	0.197295	0.0123408	0.197147	0.0953042	0.281221	0.0479936	0.176178	0.0664766	0.0664766	0.228184
8.631	0.0749154	0.379657	0.0727583	0.324868	0.0927391	0.93954	0.0975042	0.383482	0.0601454	0.560025	0.185086	0.38326	0.115074	0.545276	0.0684377	0.30531	0.072636	0.464386	0.0437171	0.55492	0.0847312	0.433394	0.165784	0.386849	0.0506449	0.39773	0.010163	0.331371	0.163384	0.490281	0.0765281	0.444298	0.231384	0.472218	0.192079	0.295459	0.157211	0.61151	0.183597	0.275274	0.16043	0.309803	0.118924	0.25316	0.0386233	0.207119	0.0702076	0.0702076	0.30281
8.768	0.101637	0.35877	0.0864986	0.337611	0.0630812	0.899544	0.0788168	0.389743	0.0548986	0.564409	0.173763	0.381031	0.169401	0.535865	0.052173	0.258434	0.0570711	0.426707	0.063234	0.580735	0.136757	0.390176	0.187459	0.387658	0.0668313	0.357451	0	0.295681	0.13149	0.464891	0.0677844	0.467271	0.222918	0.499567	0.182637	0.287832	0.0624201	0.533068	0.252911	0.338903	0.0678743	0.354865	0.145807	0.217426	0.0375281	0.256519	0.0669744	0.0669744	0.440004
8.905	0.117251	0.378798	0.192887	0.327023	0.0522503	0.889104	0.0665299	0.394109	0.0344991	0.547793	0.148795	0.342783	0.18387	0.485114	0.0452069	0.213472	0.0311297	0.421324	0.0522542	0.58953	0.192087	0.40596	0.187843	0.374341	0.108879	0.408675	0.0277148	0.33442	0.113198	0.447101	0.0831733	0.497017	0.228255	0.523778	0.16277	0.312796	0.124707	0.472221	0.180004	0.369643	0.117237	0.230944	0.167489	0.194904	0.0464006	0.279608	0.0530998	0.0530998	0.43922
9.042	0.118898	0.40143	0.162419	0.343123	0.068292	0.830774	0.0945201	0.383451	0.0330558	0.539471	0.141974	0.272203	0.141502	0.458457	0.0762553	0.199121	0	0.432089	0.0524253	0.630474	0.196216	0.417598	0.184794	0.326929	0.0748678	0.316928	0.0297518	0.369047	0.107593	0.439352	0.110137	0.526389	0.23321	0.515852	0.118861	0.344045	0.16531	0.431284	0.223346	0.414922	0.197453	0.191515	0.183761	0.19355	0.0510916	0.290206	0.0602305	0.0602305	0.288605
9.179	0.1331	0.438747	0.180356	0.347033	0.0739866	0.771896	0.127455	0.375918	0.0610763	0.565778	0.145856	0.248625	0.0982365	0.421765	0.126875	0.204765	0.0103766	0.432089	0.0484472	0.631072	0.136335	0.377498	0.177575	0.282389	0.0598673	0.358271	0.0288086	0.396218	0.103008	0.439724	0.12224	0.534926	0.22421	0.510297	0.0564429	0.35937	0.148921	0.285891	0.178414	0.495832	0.252986	0.247842	0.187474	0.211666	0.048427	0.300353	0.0639284	0.0639284	0.240491
9.316	0.150835	0.441505	0.186889	0.329612	0.111523	0.758383	0.128134	0.381564	0.0985044	0.595556	0.113547	0.227621	0.109847	0.379281	0.171615	0.204392	0.036318	0.426707	0.0612839	0.586605	0.138966	0.323764	0.156431	0.297171	0.0404092	0.393513	0.0770415	0.374812	0.0860984	0.46433	0.129246	0.525799	0.256569	0.513555	0.0359395	0.376947	0.120509	0.321479	0.154451	0.532203	0.141919	0.219679	0.200034	0.228177	0.0535748	0.25617	0.0690366	0.0690366	0.186385
9.453	0.140602	0.402721	0.156699	0.339479	0.167129	0.746624	0.114242	0.405477	0.126398	0.55667	0.116058	0.202011	0.106501	0.321287	0.20101	0.193899	0.0830126	0.432089	0.11247	0.602682	0.152007	0.304436	0.155461	0.332309	0.0431258	0.411198	0.109311	0.328434	0.062057	0.486481	0.133098	0.524947	0.313238	0.51969	0.062103	0.390906	0.194395	0.37405	0.0933352	0.461548	0.228305	0.129554	0.198877	0.220459	0.0641047	0.210955	0.0699761	0.0699761	0.229329
9.59	0.110503	0.387031	0.164843	0.367072	0.196204	0.735916	0.104079	0.426127	0.136318	0.466885	0.177875	0.219	0.111692	0.322995	0.206074	0.172742	0.15046	0.432089	0.141198	0.645764	0.161598	0.298426	0.201237	0.331115	0.0248212	0.401275	0.122855	0.317324	0.0714805	0.498483	0.136923	0.510041	0.307488	0.539154	0.088429	0.375391	0.223312	0.255153	0	0.45285	0.178941	0.157718	0.163905	0.20571	0.0481107	0.205791	0.0600948	0.0600948	0.187915
9.727	0.109219	0.409997	0.201344	0.334289	0.196712	0.748031	0.0562753	0.403267	0.137832	0.410702	0.207254	0.196593	0.0912492	0.333468	0.218783	0.152686	0.191967	0.448238	0.117433	0.615668	0.151901	0.296231	0.246223	0.310261	0.025123	0.389776	0.127189	0.337718	0.115889	0.513975	0.149731	0.462108	0.22772	0.546433	0.102871	0.348911	0.179144	0.278106	0.147795	0.378766	0.16043	0.24221	0.14447	0.240038	0.024357	0.206012	0.0554552	0.0554552	0.267668
9.864	0.118943	0.415799	0.206325	0.26848	0.135734	0.725329	0.00963048	0.427405	0.139496	0.425267	0.214484	0.174879	0.100206	0.344489	0.257545	0.176325	0.140084	0.453621	0.0986994	0.525135	0.146064	0.32094	0.241094	0.299711	0.034809	0.372203	0.136563	0.35698	0.152085	0.532947	0.150497	0.43573	0.143415	0.528691	0.0984106	0.333023	0.215846	0.264075	0.117184	0.336927	0.283838	0.185882	0.158591	0.301597	0.033657	0.19264	0.0517764	0.0517764	0.134637
10.001	0.121997	0.394528	0.178315	0.222205	0.0802519	0.741436	0.00418131	0.434717	0.14132	0.448577	0.248186	0.176429	0.118994	0.334311	0.260186	0.159528	0.0830126	0.405175	0.115825	0.446113	0.136118	0.360217	0.207347	0.2824	0.0493405	0.394402	0.13844	0.371543	0.188618	0.537618	0.140443	0.428943	0.103592	0.545608	0.0895476	0.330959	0.208485	0.189824	0.172336	0.387863	0.290008	0.0563278	0.163883	0.328718	0.0562395	0.192935	0.0405851	0.0405851	0.230025
10.138	0.136907	0.423873	0.1957	0.202698	0.0810459	0.765755	0.0214562	0.453786	0.15825	0.440185	0.26603	0.195709	0.109583	0.314109	0.235234	0.147525	0.114142	0.399792	0.146877	0.394338	0.135277	0.356374	0.192165	0.258021	0.0627402	0.433227	0.132975	0.388157	0.230547	0.536819	0.130828	0.411138	0.0999549	0.584668	0.0812535	0.324177	0.21418	0.120567	0.286458	0.299586	0.327031	0.174616	0.165309	0.335035	0.0566318	0.19551	0.0439915	0.0439915	0.164527
10.275	0.132463	0.442748	0.262786	0.16096	0.100214	0.675328	0.03674	0.484761	0.203746	0.403477	0.252615	0.180591	0.143307	0.312779	0.220898	0.168553	0.0750849	0.414491	0.14459	0.37623	0.156144	0.346626	0.170507	0.224158	0.0659635	0.441234	0.129689	0.374959	0.236801	0.534587	0.112341	0.393898	0.115975	0.598708	0.0633507	0.303711	0.282533	0.144256	0.294058	0.30884	0.203623	0.168984	0.166287	0.327998	0.054342	0.170572	0.069771	0.069771	0.0973113
10.412	0.140391	0.38216	0.323053	0.145402	0.125331	0.629446	0.0228364	0.494662	0.218071	0.397193	0.233758	0.164102	0.14417	0.285219	0.181675	0.163741	0.0364332	0.416252	0.0986424	0.375309	0.183014	0.345455	0.147424	0.192138	0.0604656	0.422734	0.13868	0.340636	0.189506	0.534246	0.0997058	0.376653	0.145459	0.591528	0.0541387	0.302162	0.319996	0.146192	0.2354	0.335967	0.178941	0.185882	0.156535	0.303881	0.0685556	0.161365	0.104459	0.104459	0.163326
10.549	0.172409	0.375257	0.380275	0.157585	0.129103	0.674498	0	0.5093	0.235885	0.398163	0.246171	0.155542	0.154798	0.279213	0.179274	0.14939	0.0323012	0.386505	0.0875328	0.331096	0.197128	0.348892	0.15961	0.180441	0.0353641	0.424619	0.130955	0.320591	0.124958	0.556402	0.11057	0.367299	0.148233	0.548135	0.0881517	0.336084	0.363751	0.0792586	0.226135	0.257872	0.172771	0.0957573	0.140729	0.293059	0.0823065	0.170882	0.101912	0.101912	0.146658
10.686	0.191994	0.421413	0.446814	0.144329	0.107801	0.711563	0.0123097	0.514651	0.235363	0.383355	0.276001	0.159116	0.158275	0.29711	0.204394	0.145183	0.0596881	0.361349	0.113216	0.330848	0.216133	0.345932	0.167609	0.186946	0.0262819	0.442693	0.135919	0.370898	0.08248	0.577064	0.123189	0.371041	0.14558	0.478379	0.131582	0.371262	0.323915	0.103398	0.266738	0.306612	0.370224	0.129554	0.143459	0.289933	0.109826	0.178887	0.08177	0.08177	0.114185
10.823	0.197842	0.420682	0.429209	0.177509	0.076958	0.701587	0.0334394	0.518992	0.209736	0.327819	0.280223	0.160639	0.155911	0.317471	0.208941	0.14791	0.0863004	0.37787	0.118107	0.355645	0.255318	0.312782	0.162361	0.193375	0.030346	0.416921	0.126917	0.39931	0.0812868	0.585307	0.138739	0.377913	0.171803	0.449031	0.140584	0.386263	0.298423	0.0930525	0.322197	0.361443	0.302349	0.14082	0.140094	0.255749	0.143161	0.179125	0.0694559	0.0694559	0.138121
10.96	0.173481	0.424566	0.279444	0.154119	0.0814677	0.736434	0.033189	0.552313	0.182674	0.33427	0.260028	0.157415	0.14416	0.352121	0.191626	0.134415	0.0723615	0.364221	0.152618	0.337203	0.276028	0.262834	0.168368	0.197858	0.023409	0.443736	0.132072	0.400676	0.064904	0.564624	0.155421	0.378685	0.170019	0.465718	0.13773	0.395933	0.286173	0.0509901	0.250985	0.306318	0.265327	0	0.124282	0.24068	0.170557	0.157135	0.0446782	0.0446782	0.134176
11.097	0.176057	0.442136	0.284076	0.198698	0.0909464	0.769165	0.0109362	0.486934	0.160939	0.390973	0.242952	0.162858	0.125702	0.396729	0.185144	0.117189	0.0375824	0.339179	0.107449	0.375401	0.271314	0.230169	0.176199	0.181584	0.0152431	0.521998	0.179997	0.395746	0.0454356	0.548301	0.163854	0.375211	0.137713	0.494654	0.154074	0.396661	0.450369	0.073965	0.263542	0.313842	0.364053	0.078859	0.139257	0.25251	0.199553	0.159802	0.0353193	0.0353193	0.0963842
11.234	0.197061	0.454659	0.312027	0.244594	0.0851773	0.762345	0.00713594	0.395672	0.147051	0.416327	0.231831	0.14476	0.0935184	0.403923	0.210083	0.125395	0.0642683	0.341994	0.102081	0.437312	0.279103	0.22393	0.0921859	0.214197	0.0128229	0.585641	0.186926	0.390782	0.0538767	0.609037	0.159557	0.384383	0.11481	0.50801	0.173139	0.387674	0.597763	0.0478623	0.306313	0.40389	0.555335	0.118288	0.142976	0.258741	0.222246	0.194314	0.0574513	0.0574513	0.11864
11.371	0.224931	0.457937	0.306622	0.255156	0.147049	0.738896	0.0550775	0.348644	0.161635	0.391042	0.234471	0.138364	0.0680179	0.386026	0.22512	0.153383	0.0945591	0.37078	0.123211	0.496331	0.297111	0.218361	0.108602	0.303761	0.0101387	0.605802	0.174323	0.372115	0.0670629	0.655656	0.137706	0.396036	0.117484	0.506449	0.162827	0.368677	0.714278	0.0289942	0.267117	0.419263	0.604699	0.185882	0.140504	0.243831	0.21328	0.187915	0.0825413	0.0825413	0.155151
11.508	0.278978	0.464672	0.274707	0.238093	0.18613	0.766263	0.1368	0.333363	0.169473	0.371752	0.268155	0.156262	0.0710552	0.324966	0.209947	0.186873	0.0936714	0.415016	0.0975169	0.522927	0.301131	0.228177	0.139018	0.302411	0.0216842	0.612941	0.178048	0.369412	0.0808206	0.713376	0.103919	0.387817	0.14603	0.498262	0.146708	0.36371	0.473056	0.0107898	0.184186	0.469397	0.283838	0.0394295	0.150452	0.223094	0.249649	0.120874	0.0949108	0.0949108	0.147585
11.645	0.325451	0.451908	0.284704	0.22324	0.140523	0.786752	0.223019	0.330655	0.171927	0.376979	0.323979	0.170484	0.0864264	0.250109	0.198732	0.211968	0.0606858	0.373098	0.0806348	0.537405	0.249485	0.25519	0.123907	0.255453	0.0230155	0.607936	0.188553	0.390278	0.0800048	0.767315	0.0765003	0.380404	0.168727	0.480995	0.152683	0.375416	0.376825	0.0158979	0.200782	0.45739	0.166601	0.107023	0.149733	0.21754	0.337144	0.0684901	0.111801	0.111801	0.157496
11.782	0.304424	0.40956	0.327308	0.226891	0.078943	0.80793	0.305336	0.354602	0.182411	0.389159	0.373396	0.161698	0.130914	0.212832	0.202976	0.207847	0.0791364	0.33271	0.0663667	0.53846	0.223808	0.292158	0.107817	0.248271	0	0.583469	0.197597	0.411515	0.0909156	0.813664	0.0854772	0.397554	0.177997	0.453234	0.174821	0.388631	0.484702	0.0358461	0.201899	0.417748	0.16043	0.152085	0.126282	0.210869	0.412534	0.050402	0.126432	0.126432	0.188027
11.919	0.244477	0.376879	0.390313	0.26439	0.0640489	0.805443	0.33408	0.354081	0.157785	0.368091	0.337873	0.152927	0.16196	0.235782	0.190928	0.185656	0.0606552	0.322985	0.056004	0.553762	0.214579	0.328778	0.123842	0.232493	0.0101818	0.586562	0.193207	0.428706	0.106655	0.861404	0.102176	0.408506	0.173455	0.436025	0.187571	0.416005	0.455843	0.0831346	0.123435	0.414303	0.166601	0.123921	0.121513	0.220684	0.472721	0.0318864	0.133777	0.133777	0.185364
12.056	0.205056	0.359045	0.448948	0.271976	0.0576223	0.753122	0.290765	0.340597	0.130291	0.324642	0.282366	0.169537	0.196079	0.233663	0.180325	0.159803	0.0503673	0.334546	0.0557395	0.552685	0.208761	0.406234	0.164506	0.217193	0.0188167	0.564139	0.149498	0.437053	0.116955	0.890086	0.112136	0.400766	0.176298	0.435649	0.172871	0.448716	0.43362	0.0396884	0.260605	0.464935	0.271497	0.129554	0.125749	0.270047	0.508299	0.0347506	0.132481	0.132481	0.171813
12.193	0.184871	0.384746	0.47047	0.276241	0.0769331	0.709252	0.257265	0.346264	0.12786	0.333224	0.256271	0.185287	0.234382	0.221427	0.20616	0.147225	0.0553663	0.326795	0.0418189	0.51746	0.232535	0.397873	0.218926	0.247859	0.00865642	0.49415	0.128272	0.469335	0.140591	0.883025	0.112263	0.379789	0.180448	0.456967	0.145288	0.459749	0.412993	0	0.192632	0.517071	0.283838	0.326701	0.126467	0.301152	0.524954	0.0583317	0.111892	0.111892	0.141574
12.33	0.167951	0.411561	0.447593	0.302086	0.107515	0.695231	0.296024	0.350929	0.132736	0.320432	0.25026	0.205295	0.265803	0.214989	0.224726	0.136206	0.0488269	0.271986	0.047524	0.492717	0.254267	0.377576	0.246764	0.300647	0.00858096	0.44816	0.130732	0.494111	0.135558	0.888058	0.130844	0.352202	0.17166	0.497212	0.136707	0.463002	0.346306	0.054793	0.227911	0.475405	0.16043	0.332334	0.123681	0.318359	0.594582	0.0589764	0.0839673	0.0839673	0.168067
12.467	0.139401	0.377935	0.439334	0.411193	0.067163	0.694122	0.308053	0.33929	0.142035	0.301806	0.243729	0.220143	0.331232	0.205419	0.229731	0.136335	0.0742392	0.278153	0.0150824	0.480087	0.264485	0.355082	0.271082	0.301634	0.0203097	0.432913	0.125658	0.493113	0.117449	0.896102	0.156937	0.313299	0.160738	0.535583	0.143261	0.462586	0.40432	0.150911	0.265917	0.483133	0.111067	0.315436	0.122423	0.333422	0.6583	0.0323034	0.0783815	0.0783815	0.170494
12.604	0.154673	0.329781	0.446646	0.490659	0.0561832	0.735457	0.27777	0.361579	0.13644	0.29729	0.240933	0.195255	0.419105	0.219779	0.198238	0.149249	0.07728	0.305438	0.00754119	0.455662	0.250392	0.314655	0.259156	0.249288	0.02978	0.425072	0.129273	0.487767	0.109219	0.858062	0.174041	0.270085	0.140869	0.555805	0.137835	0.428822	0.439855	0.134226	0.227025	0.426818	0.246816	0.247842	0.113464	0.331197	0.651975	0.0285412	0.0871803	0.0871803	0.147485
12.741	0.218882	0.332676	0.38621	0.502852	0.104916	0.764871	0.244488	0.39342	0.136572	0.304249	0.264163	0.151587	0.496364	0.21916	0.213262	0.128728	0.0638808	0.338521	0.0253673	0.444373	0.206611	0.311369	0.219473	0.214928	0.0334884	0.417863	0.142642	0.48928	0.120185	0.780663	0.193666	0.245291	0.125859	0.584062	0.135512	0.370843	0.510734	0.0546861	0.107995	0.399345	0.178941	0.337967	0.102769	0.317615	0.584532	0.0152071	0.087191	0.087191	0.14471
12.878	0.253177	0.370989	0.366221	0.495978	0.128433	0.797568	0.164938	0.382235	0.14518	0.324353	0.314551	0.112952	0.512828	0.233893	0.300161	0.0954637	0.0978547	0.358929	0.00184121	0.429406	0.19313	0.339652	0.181285	0.197986	0.0756656	0.426099	0.134928	0.478345	0.135857	0.704313	0.204214	0.237289	0.10697	0.613875	0.150661	0.326742	0.588178	0.0999326	0.139707	0.270052	0.0987263	0.174616	0.0905859	0.293956	0.478196	0	0.0721992	0.0721992	0.128309
13.015	0.231577	0.410012	0.298688	0.445834	0.118415	0.823265	0.0992628	0.383114	0.171701	0.320051	0.360822	0.0881362	0.515476	0.251418	0.35738	0.0894712	0.127068	0.380535	0	0.398232	0.222359	0.343368	0.188813	0.186261	0.113051	0.446531	0.131586	0.431481	0.12988	0.660771	0.203175	0.25704	0.0917118	0.625038	0.166241	0.302237	0.589177	0.131869	0.29604	0.340571	0.185112	0.225311	0.0839522	0.274852	0.41268	0.0302598	0.0467107	0.0467107	0.110384
13.152	0.21132	0.411706	0.246186	0.424309	0.106641	0.810627	0.0731301	0.337962	0.229237	0.288176	0.378529	0.0832643	0.531969	0.250865	0.402188	0.086212	0.110946	0.371127	0.0379809	0.394817	0.219751	0.354416	0.200187	0.188931	0.125125	0.460766	0.147839	0.381777	0.114696	0.646374	0.212774	0.28725	0.0784656	0.62804	0.182833	0.285491	0.510606	0.104377	0.277475	0.317585	0.117237	0.168984	0.0825367	0.288484	0.42071	0.0663388	0.0389982	0.0389982	0.097809
13.289	0.191316	0.388847	0.232248	0.386173	0.104116	0.881962	0.0674773	0.262747	0.303821	0.273489	0.383983	0.0913521	0.538258	0.237025	0.480214	0.0886579	0.117954	0.335962	0.0467979	0.40372	0.181128	0.353099	0.169304	0.149195	0.137015	0.468368	0.170785	0.349089	0.11241	0.634152	0.223433	0.284577	0.0895306	0.626563	0.202711	0.272235	0.417568	0.0943858	0.282497	0.375489	0.129578	0.219679	0.0698085	0.308131	0.431831	0.0889264	0.0479719	0.0479719	0.104473
13.426	0.176595	0.366715	0.282605	0.411619	0.0936882	0.940888	0.0572627	0.217584	0.361014	0.244225	0.378138	0.107663	0.545899	0.202993	0.53309	0.0930361	0.198288	0.282319	0.0453302	0.39988	0.175967	0.347318	0.166743	0.096417	0.141489	0.455187	0.190764	0.344719	0.128348	0.602654	0.213285	0.263283	0.128125	0.611494	0.216459	0.251792	0.401388	0.118441	0.207568	0.327484	0.31469	0.394295	0.0832388	0.324195	0.39712	0.0968327	0.0399971	0.0399971	0.125976
13.563	0.152789	0.356877	0.332696	0.419826	0.153997	0.9734	0.0463672	0.200298	0.404187	0.213783	0.379251	0.102407	0.567489	0.161385	0.56686	0.0754867	0.277565	0.227119	0.0448167	0.395474	0.189089	0.361567	0.182574	0.0924415	0.130331	0.40637	0.193188	0.349187	0.15239	0.584726	0.197469	0.259541	0.149091	0.597032	0.232636	0.222663	0.451884	0.112393	0.241376	0.282132	0.259157	0.247842	0.0654497	0.329235	0.338145	0.0986888	0.0149576	0.0149576	0.156681
13.7	0.115759	0.357817	0.36092	0.372732	0.208778	0.967826	0.0400112	0.210476	0.404168	0.193615	0.38959	0.0743099	0.576566	0.156031	0.578292	0.0642111	0.285366	0.190568	0.0868741	0.374	0.178471	0.337182	0.176248	0.0995957	0.134983	0.352522	0.182068	0.325141	0.131601	0.575714	0.182329	0.272954	0.134643	0.590328	0.245104	0.204603	0.403664	0.112303	0.274782	0.297048	0.104897	0.163351	0.0885975	0.35591	0.311926	0.104238	0	0	0.161702
13.837	0.130662	0.409555	0.366547	0.260776	0.264793	0.898411	0.058915	0.19715	0.345649	0.153672	0.382006	0.0480176	0.598381	0.161112	0.559378	0.0721053	0.225554	0.174638	0.127469	0.364456	0.149558	0.3046	0.181675	0.0930234	0.163432	0.293105	0.172489	0.308447	0.117332	0.533385	0.176545	0.283639	0.0974031	0.549393	0.239917	0.217624	0.307752	0.135391	0.182002	0.356294	0.191282	0.326701	0.0899175	0.322061	0.287528	0.129145	0.00676185	0.00676185	0.16658
13.974	0.152904	0.397982	0.446425	0.239612	0.30411	0.881683	0.0870738	0.165254	0.300577	0.121988	0.431947	0.0472116	0.634006	0.183109	0.530277	0.0743555	0.209307	0.139871	0.119093	0.329028	0.11758	0.314949	0.17458	0.0830709	0.203663	0.258193	0.181168	0.324758	0.119996	0.510633	0.167174	0.28488	0.0828651	0.492722	0.231575	0.220749	0.249582	0.112157	0.130169	0.421942	0.203623	0.354865	0.0910128	0.300387	0.258504	0.169871	0.0277778	0.0277778	0.171651
14.111	0.215248	0.306133	0.502979	0.289363	0.303856	0.919955	0.103494	0.158504	0.334742	0.0991698	0.543011	0.042685	0.627009	0.195082	0.503377	0.0670361	0.212996	0.107057	0.177602	0.27889	0.0835046	0.312707	0.134718	0.0820323	0.207921	0.257746	0.21004	0.357309	0.146074	0.509166	0.143602	0.291112	0.0689519	0.475142	0.25923	0.208709	0.250023	0.165482	0.0991199	0.33807	0.15426	0.461888	0.0897096	0.326301	0.256337	0.208065	0.0533313	0.0533313	0.175596
14.248	0.254105	0.323993	0.513476	0.277974	0.318669	0.879377	0.111463	0.152807	0.405682	0.0910957	0.582195	0.0368832	0.597882	0.176715	0.51345	0.069531	0.215631	0.0949391	0.197518	0.284211	0.0830158	0.30017	0.112924	0.130327	0.213899	0.269442	0.223187	0.384346	0.199046	0.511071	0.138506	0.308963	0.066056	0.420794	0.263255	0.201448	0.335804	0.201058	0.204185	0.372238	0.215964	0.360498	0.100365	0.382321	0.230808	0.214675	0.0908637	0.0908637	0.182284
14.385	0.214696	0.368489	0.516812	0.230168	0.305437	0.787031	0.130712	0.141544	0.429175	0.110859	0.573839	0.0268259	0.593035	0.137625	0.567734	0.0837722	0.242745	0.101937	0.230484	0.285956	0.10432	0.315868	0.107833	0.209675	0.246832	0.263884	0.233142	0.377738	0.231473	0.484637	0.145439	0.335083	0.0737855	0.374936	0.252709	0.196292	0.419669	0.230811	0.228427	0.373465	0.0987263	0.315436	0.130012	0.398139	0.172917	0.219276	0.120373	0.120373	0.235246
14.522	0.184559	0.370064	0.499392	0.220507	0.353519	0.666081	0.15558	0.119741	0.409904	0.127874	0.568876	0.0221012	0.635138	0.15141	0.564989	0.0749914	0.257348	0.107883	0.266815	0.249499	0.130508	0.3538	0.0927383	0.220414	0.272672	0.237006	0.2606	0.377841	0.257108	0.468161	0.157203	0.347053	0.0940201	0.360802	0.262003	0.184549	0.430752	0.276508	0.192339	0.404006	0.104897	0.30417	0.15184	0.37926	0.121884	0.240113	0.126575	0.126575	0.240895
14.659	0.214583	0.405092	0.48875	0.277692	0.445402	0.54195	0.188875	0.106614	0.389993	0.121954	0.582389	0.0251269	0.720273	0.191163	0.542298	0.0579863	0.269605	0.09304	0.227896	0.230082	0.183582	0.367517	0.0967895	0.206242	0.243442	0.204809	0.298718	0.402032	0.254555	0.476134	0.167684	0.322502	0.120751	0.35295	0.296183	0.187975	0.443431	0.229405	0.10826	0.278776	0.141919	0.315436	0.149643	0.321926	0.101293	0.259693	0.130684	0.130684	0.173978
14.796	0.193872	0.411726	0.530099	0.301475	0.474837	0.424459	0.219518	0.111151	0.371023	0.104229	0.565045	0.034277	0.752431	0.21448	0.556501	0.0620648	0.302236	0.0913315	0.213041	0.246036	0.217947	0.361848	0.101117	0.200668	0.31617	0.197435	0.383	0.401637	0.213947	0.471987	0.16336	0.275818	0.103528	0.344956	0.287736	0.198658	0.377493	0.138642	0.143784	0.322493	0.135749	0.292905	0.156592	0.296191	0.131343	0.281049	0.164401	0.164401	0.202363
14.933	0.212226	0.387892	0.516359	0.303328	0.464998	0.36734	0.200198	0.103018	0.370384	0.0786786	0.551837	0.0491504	0.780431	0.194031	0.5964	0.0862793	0.357715	0.0616727	0.212989	0.295419	0.221589	0.34357	0.113352	0.211994	0.426709	0.189514	0.426391	0.368006	0.167208	0.465971	0.17333	0.238474	0.0772215	0.340575	0.252972	0.218435	0.332727	0.0924956					0.15762	0.272646	0.177421	0.292825	0.204239	0.204239	0.193583
15.07	0.27809	0.413843	0.526832	0.278159	0.464818	0.313382	0.139081	0.109449	0.411516	0.0755772	0.541815	0.0446938	0.810011	0.176994	0.636036	0.0961057	0.367106	0.0556552	0.225209	0.299066	0.20851	0.291144	0.161099	0.281611	0.450102	0.202157	0.439341	0.355469	0.146207	0.501	0.219641	0.237501	0.0776344	0.325611	0.223998	0.221029	0.44663	0.103735					0.166708	0.280781	0.179658	0.283899	0.20599	0.20599	0.145021
15.207	0.252669	0.454678	0.486472	0.291176	0.383096	0.239912	0.137827	0.118927	0.465686	0.0994585	0.538568	0.0374058	0.775528	0.172149	0.692213	0.080458	0.359819	0.0572733	0.227698	0.264439	0.168784	0.226695	0.211371	0.330761	0.429814	0.226997	0.479534	0.38477	0.127405	0.537313	0.245428	0.259617	0.0878735	0.294874	0.242302	0.197625	0.520922	0.11821					0.191052	0.303474	0.17834	0.25941	0.20266	0.20266	0.227978
15.344	0.247263	0.463229	0.421566	0.342924	0.426724	0.163286	0.132596	0.127631	0.507266	0.119898	0.567492	0.0395342	0.740432	0.182967	0.731437	0.0653301	0.386127	0.0454219	0.242537	0.255332	0.133397	0.203276	0.17732	0.370965	0.396719	0.21602	0.459979	0.366281	0.102975	0.547721	0.216116	0.235332	0.120973	0.288906	0.292464	0.198007	0.418619	0.144718					0.204443	0.305681	0.149041	0.235215	0.200816	0.200816	0.253084
15.481	0.225162	0.414584	0.404978	0.366518	0.47743	0.14269	0.149287	0.143777	0.554449	0.138212	0.623348	0.0401144	0.778575	0.197814	0.745074	0.0686321	0.382631	0.029071	0.253522	0.252019	0.141987	0.194465	0.171281	0.382362	0.382273	0.155848	0.482362	0.367966	0.11034	0.609878	0.230633	0.198906	0.168129	0.316714	0.296934	0.217163	0.373667	0.182853					0.219744	0.313134	0.113738	0.252817	0.176153	0.176153	0.190597
15.618	0.212313	0.366065	0.378392	0.353825	0.488509	0.130178	0.161302	0.137949	0.609338	0.14751	0.699109	0.0428169	0.860882	0.203563	0.728402	0.0774312	0.340013	0.0320208	0.253641	0.215562	0.196108	0.174279	0.162881	0.433501	0.378247	0.138839	0.516368	0.373009	0.131523	0.674949	0.276589	0.19237	0.211954	0.298931	0.252853	0.209039	0.430735	0.188822					0.21666	0.306321	0.0839112	0.300433	0.169199	0.169199	0.16551
15.755	0.25259	0.368275	0.323954	0.354085	0.627853	0.101819	0.144113	0.126087	0.660166	0.134423	0.751125	0.0533838	0.941349	0.202753	0.688358	0.0839373	0.304485	0.0351014	0.247361	0.207074	0.239247	0.169853	0.172538	0.386805	0.340463	0.112812	0.534011	0.374459	0.124519	0.723712	0.292311	0.21007	0.249739	0.256279	0.205039	0.182043	0.46436	0.158602					0.192254	0.292135	0.0735862	0.281281	0.183174	0.183174	0.199637
15.892	0.27783	0.340555	0.302181	0.306595	0.756869	0.098893	0.12134	0.116324	0.710589	0.11705	0.738293	0.0567892	0.950311	0.21431	0.64581	0.0873249	0.285914	0.0224453	0.249347	0.245901	0.227735	0.171313	0.101805	0.348315	0.329268	0.0889144	0.561177	0.353602	0.110234	0.726703	0.328885	0.208627	0.250168	0.23271	0.174711	0.181223	0.437695	0.109265					0.176358	0.316879	0.100034	0.246193	0.189127	0.189127	0.217563
16.029	0.288335	0.284801	0.340356	0.267333	0.734773	0.0722584	0.141362	0.122528	0.777307	0.118396	0.714907	0.0575381	0.896013	0.213105	0.631874	0.0774496	0.25488	0.0188959	0.257692	0.26856	0.241624	0.150897	0.108326	0.335767	0.342225	0.0931093	0.562662	0.295935	0.100655	0.713773	0.308888	0.187202	0.222521	0.239962	0.185267	0.207448	0.458252	0.123121					0.232551	0.319088	0.134815	0.277043	0.2001	0.2001	0.2328
16.166	0.314581	0.245263	0.368221	0.270835	0.613449	0.042805			0.859088	0.135503	0.689189	0.0572081	0.863625	0.212142	0.63244	0.0666937	0.262572	0.0177994	0.282437	0.262861	0.294038	0.12628	0.0993351	0.338687	0.366216	0.102857	0.564037	0.293441	0.0929801	0.690191	0.276467	0.191503	0.196945	0.216764	0.231938	0.247783	0.469207	0.162871					0.284873	0.322934	0.129691	0.293227	0.204129	0.204129	0.182652
16.303	0.306057	0.199575	0.384303	0.283308	0.638299	0.0391019			0.885012	0.136392	0.706546	0.0647126	0.852244	0.219013	0.61805	0.0777737	0.306175	0	0.305211	0.242378	0.317735	0.120318	0.0945744	0.307691	0.37656	0.0976131	0.544109	0.3431	0.103702	0.667261	0.266169	0.199037	0.211441	0.206306	0.242718	0.2741	0.425144	0.13489					0.30701	0.327143	0.0884323	0.271041	0.208609	0.208609	0.228713
16.44	0.343035	0.190674	0.420322	0.223173	0.536063	0.0326191			0.847551	0.126233	0.700176	0.0468184	0.83002	0.202993	0.606306	0.0922534	0.316835	0.0241425	0.320687	0.2431	0.343079	0.108204	0.102541	0.283686	0.338339	0.0774793	0.518816	0.362486	0.144826	0.635966	0.266519	0.199808	0.257326	0.188335	0.242365	0.280212	0.300757	0.120995					0.302915	0.338339	0.0570184	0.245504	0.18574	0.18574	0.224643
16.577	0.392466	0.216157	0.5456	0.199538	0.436209	0.0254719			0.774194	0.123952	0.635366	0.0368164	0.811263	0.204182	0.557724	0.103786	0.304948	0.0258796	0.326585	0.214124	0.340549	0.122371	0.0768044	0.271796	0.306856	0.0405018	0.475427	0.365339	0.181864	0.588782	0.243785	0.214709	0.282568	0.166479	0.226092	0.281807	0.226639	0.201063					0.299225	0.359292	0.0459848	0.24426	0.154721	0.154721	0.208591
16.714	0.396864	0.221504	0.532098	0.160677	0.349468	0.0308213			0.696658	0.125384	0.578691	0.0381345	0.765199	0.244372	0.497217	0.114713	0.29552	0.0231569	0.276275	0.215352	0.309358	0.115728	0.0562399	0.23355	0.308122	0.00941741	0.407385	0.372884	0.189062	0.525173	0.209504	0.221138	0.290012	0.169225	0.205761	0.275205	0.161838	0.200445					0.261838	0.358276	0.0724969	0.309922	0.152673	0.152673	0.277238
16.851	0.296989	0.229759	0.436067	0.0924615	0.294023	0.0254475			0.654444	0.109791	0.521644	0.052857	0.688234	0.283774	0.481084	0.137558	0.285186	0.0344049	0.252832	0.213273	0.272539	0.109468	0.0698828	0.193723	0.353981	0.0209004	0.349129	0.386907	0.188974	0.474331	0.184722	0.195018	0.301485	0.193118	0.241667	0.271957	0.122106	0.204079					0.241999	0.360994	0.0894221	0.382915	0.178141	0.178141	0.246806
16.988	0.289294	0.258828	0.408029	0.0751537	0.215825	0.0266249			0.602183	0.0918003	0.448858	0.0700372	0.64838	0.32029	0.485473	0.130024	0.279834	0.0561849	0.247438	0.224788	0.283363	0.143428	0.0895916	0.191168	0.395722	0.0234929	0.343658	0.390111	0.179989	0.462568	0.180636	0.159483	0.315837	0.215992	0.279757	0.274949	0.14765	0.225152					0.240027	0.389628	0.0329132	0.427732	0.208837	0.208837	0.283435
17.125	0.351189	0.274026	0.438148	0.0903977	0.182854	0.0365176			0.545169	0.0971657	0.408869	0.0670189	0.65797	0.344522	0.43801	0.0850197	0.216381	0.0428269	0.222092	0.236352	0.288186	0.181002	0.111017	0.165588	0.400481	0.0267882	0.36389	0.389205	0.14618	0.454641	0.197691	0.137302	0.329893	0.206207	0.289949	0.253909	0.158837	0.231993					0.248436	0.431393			0.215778	0.215778	0.377996
17.262	0.393983	0.300296	0.427983	0.0677736	0.15935	0.04174			0.543462	0.102265	0.437581	0.066733	0.690508	0.347954	0.393175	0.0839312	0.190068	0.0417562	0.242366	0.220167	0.226505	0.167372	0.140323	0.098637	0.377007	0.024712	0.366412	0.415062	0.124314	0.438476	0.223677	0.139006	0.333769	0.17796	0.301413	0.224993	0.140805	0.311161					0.279144	0.431154			0.207129	0.207129	0.251952
17.399	0.420005	0.320828	0.386721	0.0691281	0.112521	0.0347149			0.594792	0.105962	0.458967	0.0627848	0.668584	0.359375	0.38196	0.0776758	0.234632	0.0374731	0.29461	0.210828	0.18532	0.13981	0.144212	0.0688254	0.354396	0.0247014	0.321988	0.44336	0.131612	0.441492	0.240676	0.160315	0.320936	0.146048	0.325592	0.19539	0.137479	0.2821					0.337674	0.414125			0.216375	0.216375	0.202873
17.536	0.416221	0.37189	0.323402	0.071185	0.138023	0.0132343			0.645718	0.131374	0.443841	0.0527085	0.609732	0.393899	0.359549	0.0759943	0.288653	0.0635841	0.268962	0.228628	0.181804	0.132128	0.155017	0.0613633	0.34574	0.063127	0.240386	0.420733	0.156541	0.447554	0.250219	0.171727	0.290452	0.122218	0.352588	0.168462	0.225483	0.158168					0.38707	0.383702			0.226534	0.226534	0.232832
17.673	0.363495	0.40172	0.298752	0.0546876	0.142403	0			0.676522	0.137599	0.435765	0.0473864	0.532588	0.449637	0.369301	0.0772294	0.277126	0.0661878	0.218835	0.271209	0.188547	0.135402	0.20531	0.0414222	0.345993	0.0602256	0.223814	0.458357	0.16991	0.416433	0.23759	0.152152	0.288911	0.1245	0.371724	0.149772	0.277593	0.140122					0.458985	0.346887			0.225442	0.225442	0.252194
17.81	0.313293	0.431699	0.287802	0.0756949	0.109023	0.0236253			0.660645	0.114226	0.446655	0.0494148	0.420571	0.504232	0.374374	0.062609	0.265284	0.0295501	0.178504	0.247474	0.211238	0.158432	0.247517	0.0343458	0.367154	0.0011073	0.189212	0.479494	0.196399	0.393131	0.253067	0.13415	0.29799	0.11989	0.377848	0.136393	0.276083	0.267108					0.559451	0.301917			0.219572	0.219572	0.282178
17.947	0.217494	0.459433	0.263349	0.0904431	0.11277	0.031984			0.635709	0.104339	0.44987	0.0543941	0.314205	0.559056	0.37234	0.0495907	0.315209	0.00951899	0.174869	0.264348	0.253223	0.16052	0.254228	0.0419127	0.293839	0.000250208	0.193855	0.43569	0.22745	0.409484	0.251357	0.155646	0.285178	0.101313	0.420943	0.156274	0.382706	0.262129					0.658294	0.264666			0.229645	0.229645	0.292363
18.084	0.182791	0.476032	0.278374	0.0878619	0.129977	0.0194337			0.616071	0.115884	0.419442	0.0477287	0.225639	0.561799	0.428576	0.0451147	0.352919	0.0169053	0.213944	0.292236	0.279509	0.151613	0.271472	0.0354775	0.252621	0	0.195684	0.406461	0.245398	0.413738	0.259429	0.166856	0.288037	0.0837171	0.527117	0.174002	0.407188	0.169121					0.667641	0.246399			0.283999	0.283999	0.38736
18.221	0.192261	0.522416	0.306238	0.110475	0.127781	0.00369328			0.539861	0.113423	0.378768	0.0328675	0.200029	0.540518	0.53361	0.0404553	0.413241	0.0310132	0.233092	0.285692	0.303856	0.115739	0.281654	0.0293259	0.266473	0.0104023	0.228942	0.419398	0.266059	0.397298	0.228035	0.161869	0.309098	0.0708834	0.623683	0.164396	0.327758	0.1848					0.62722	0.228685			0.352219	0.352219	0.370953
18.358	0.176324	0.518124	0.288063	0.155039	0.113669	5.86235e-05			0.464845	0.112678	0.383363	0.0372242	0.192673	0.55455	0.609078	0.0495663	0.468354	0.0432494	0.253367	0.277726	0.327505	0.0500531	0.256502	0.0127831	0.300474	0.0308075	0.287071	0.418261	0.305451	0.386442	0.207112	0.158228	0.32713	0.0436442	0.63931	0.136475	0.309807	0.259266					0.576178	0.191857			0.393866	0.393866	0.454768
18.495	0.159459	0.528486	0.269045	0.141648	0.103185	0.00930649			0.461751	0.0887971	0.445156	0.0448023	0.184568	0.594204	0.629165	0.0663635	0.447467	0.0559427	0.263361	0.242567	0.3586	0.0111415	0.220329	0.0182697	0.346888	0.0585274			0.316395	0.398918	0.226747	0.149666	0.347523	0.0299646	0.698143	0.117689	0.345801	0.262832					0.558631	0.181667			0.433237	0.433237	0.462795
18.632	0.147017	0.552287	0.257996	0.0934065					0.461746	0.0824153	0.49243	0.057543	0.176598	0.624009	0.599851	0.0619242	0.421127	0.0823659	0.270415	0.210655	0.411663	0.00172084	0.207119	0.043784	0.372275	0.0792947			0.353079	0.408684	0.232593	0.14723	0.377054	0.0349822	0.781194	0.118959	0.300449	0.231914					0.580841	0.265979			0.435594	0.435594	0.44075
18.769	0.139846	0.566057	0.199176	0.0773151					0.489428	0.0919967	0.459777	0.0584036	0.159611	0.617401	0.548313	0.0432681	0.403393	0.0881024	0.306731	0.171612	0.435486	0.00112737	0.182677	0.0638013	0.374248	0.0853529			0.385673	0.426132	0.187587	0.156982	0.415067	0.033844	0.808553	0.113731	0.251317	0.28003					0.605235	0.228967			0.406581	0.406581	0.522849
18.906	0.139315	0.549	0.161309	0.0975359					0.519804	0.0848236	0.424272	0.0532152	0.147622	0.59381	0.500569	0.0118993	0.398339	0.0618105	0.332487	0.164433	0.430105	0	0.204985	0.0574878	0.354493	0.0871948			0.434543	0.439475	0.153867	0.182175	0.445011	0.0296305	0.81395	0.0890103	0.252223	0.253128					0.570157	0.229023			0.39581	0.39581	0.557512
19.043	0.139701	0.499611	0.111927	0.118231					0.532122	0.0626113	0.419277	0.0529367	0.174648	0.590782	0.454746	0	0.442978	0.0751604	0.358907	0.161595	0.431986	0.00282035	0.24398	0.039554	0.325624	0.0914324			0.511507	0.423952	0.169922	0.200464	0.491388	0.0139772	0.833368	0.0812185	0.260415	0.143559					0.526417	0.257018			0.401006	0.401006	0.520653
19.18			0.08819	0.142175					0.56837	0.046007	0.444935	0.0340587	0.192987	0.522846	0.40693	0.00265992	0.471868	0.0982862	0.39374	0.130119	0.450111	0.0075304	0.267042	0.0362769	0.278159	0.0882862			0.566322	0.402127	0.182907	0.202435	0.526145	0.00549273	0.836064	0.112191	0.275062	0.146079					0.472853	0.254134			0.410017	0.410017	0.478779
19.317			0.0932699	0.17405					0.575681	0.0359173	0.446623	0.0186505	0.193944	0.483838	0.358562	0.0242267			0.407593	0.128159	0.448022	0.0143291	0.301601	0.0677318	0.216809	0.0823291			0.588731	0.376095	0.160789	0.206116	0.543515	0.0116903	0.832264	0.126724	0.238	0.137314					0.4264	0.240214			0.400629	0.400629	0.423528
19.454			0.127987	0.186846					0.523993	0.0320651	0.417985	0.00850793	0.20145	0.421486	0.339023	0.0530456			0.38819	0.146083	0.400701	0.0349934	0.313506	0.0591792	0.183267	0.0839901			0.605614	0.342232	0.13211	0.21728	0.528776	0.0159091	0.837006	0.123307	0.196723	0.165836					0.385463	0.211795			0.372208	0.372208	0.377753
19.591			0.104802	0.171449					0.473697	0.0139534	0.368066	0	0.200009	0.369158	0.318505	0.0840046			0.406291	0.135333	0.330494	0.0629089	0.31922	0.050579	0.179801	0.0987151			0.606629	0.335528	0.105768	0.2285	0.515281	0.0187285	0.830003	0.133972	0.240183	0.230423					0.351014	0.174597			0.329873	0.329873	0.321687
19.728			0.0551936	0.168868					0.451554	0.0055213	0.283259	0.00161743	0.187895	0.362227	0.263302	0.108451			0.463981	0.0721179	0.278931	0.0972651	0.309054	0.0323152	0.159012	0.125503			0.573758	0.348988	0.0966025	0.244873	0.512814	0.0125362	0.815939	0.161803	0.238238	0.225034					0.337544	0.155479			0.289847	0.289847	0.253053
19.865			0.077257	0.163599					0.460957	0.0168065	0.248641	0.0316463	0.18974	0.346985	0.239324	0.122674			0.525083	0.0144667	0.245068	0.129176	0.290401	0.0325041	0.134396	0.144658			0.542685	0.332849	0.124471	0.268567	0.509844	0.00679282	0.791893	0.203982	0.204897	0.190465					0.345801	0.152998			0.283386	0.283386	0.272017
20.002			0.112015	0.147477					0.515625	0.0216983	0.259785	0.0764027	0.194812	0.322584	0.270603	0.11895			0.606558	0.00504663	0.204127	0.151039	0.322729	0.0475067	0.1263	0.145259			0.502999	0.308411	0.1692	0.278889	0.497773	0.0198407	0.751856	0.260892	0.293134	0.268542					0.345577	0.141477			0.284316	0.284316	0.215684
20.139			0.107185	0.112657					0.56821	0.0108462	0.256519	0.0973287	0.189306	0.330337	0.264584	0.106226			0.614441	0.0110735	0.163562	0.175521	0.37377	0.045485	0.124553	0.157365			0.481622	0.326939	0.201865	0.26357	0.511363	0.04968	0.744452	0.291291	0.199788	0.298622					0.352092	0.129512			0.277804	0.277804	0.215024
20.276			0.0593494	0.0451784					0.553382	0	0.287448	0.103812	0.207091	0.352274	0.224336	0.0986678			0.682981	0.00335545	0.176224	0.21333	0.395677	0.0553243	0.110254	0.152068			0.469163	0.367603	0.205291	0.238665	0.499642	0.0758383	0.743276	0.271919	0.231295	0.301485					0.366803	0.121147			0.279563	0.279563	0.21742
20.413			0.0231969	0					0.514586	0.0102283	0.335582	0.105898	0.20551	0.364291	0.205875	0.114053			0.757174	0	0.260095	0.244694	0.374582	0.120129	0.0801231	0.146265			0.411784	0.369824	0.19784	0.233472	0.477195	0.0906614	0.705352	0.279783	0.278905	0.343874					0.389086	0.126434			0.304497	0.304497	0.223069
20.55			0.0611918	0.0312349					0.500298	0.0410748	0.368737	0.0770197	0.209794	0.363547	0.214385	0.163986			0.794771	0.00706636	0.359633	0.26031	0.326396	0.162357	0.0959106	0.185676			0.369329	0.363374	0.195592	0.252406	0.475633	0.118992	0.62266	0.338611	0.180433	0.33592					0.354935	0.119013			0.349716	0.349716	0.169044
20.687			0.0931595	0.0160857					0.491018	0.0676591	0.357925	0.0632215	0.186733	0.326324	0.217991	0.208036			0.786639	0.0185492	0.416163	0.276515	0.282515	0.181787	0.148679	0.201694			0.342074	0.372794	0.184178	0.304298	0.510204	0.116371	0.532868	0.33903							0.293574	0.0966887			0.411853	0.411853	0.117931
20.824			0.0754959	0.0189753					0.484849	0.0888375	0.35351	0.101606	0.149921	0.322234	0.220618	0.209626			0.737045	0.0302475	0.387294	0.284857	0.268266	0.197799	0.187687	0.173506			0.311001	0.38983	0.179287	0.34727	0.505868	0.147019	0.478189	0.322916							0.300494	0.116197			0.463477	0.463477	0.12559
20.961			0.0639876	0.0313684					0.451803	0.0876016	0.358362	0.159334	0.121677	0.330331	0.225962	0.208147			0.692421	0.047531	0.335779	0.28741	0.237487	0.210034	0.203523	0.16337			0.294862	0.407135	0.170233	0.39112	0.517235	0.183229	0.448154	0.33659							0.314666	0.138327			0.491226	0.491226	0.14565
21.098									0.385973	0.0996376	0.336705	0.166007	0.107269	0.341839	0.223897	0.222235			0.744561	0.0146552	0.31177	0.297059	0.205321	0.216515	0.172978	0.174848			0.308454	0.419673	0.149942	0.401774	0.560653	0.207612	0.42668	0.341618							0.312919	0.143034			0.492565	0.492565	0.111466
21.235									0.331822	0.110334	0.275068	0.136905	0.117892	0.361718	0.220251	0.227426			0.71992	0.00143805	0.291485	0.322572	0.176984	0.213616	0.129329	0.174938			0.360949	0.419408	0.155832	0.383853	0.609042	0.234778	0.386844	0.316759							0.318244	0.1233			0.468798	0.468798	0.108722
21.372									0.285885	0.12811	0.23988	0.133435	0.117902	0.340503	0.215047	0.195886			0.626002	0.017025	0.254753	0.357354	0.1615	0.205414	0.126661	0.201226			0.379523	0.387853	0.147199	0.376486	0.587786	0.26599	0.362598	0.267031							0.307151	0.0925016			0.469835	0.469835	0.102706
21.509									0.234244	0.136161	0.23053	0.142781	0.122809	0.336446	0.198569	0.199849			0.572643	0.00805738	0.184429	0.335234	0.16794	0.197129	0.159271	0.283874			0.38504	0.348055	0.152445	0.33709	0.495534	0.286243	0.357664	0.236873							0.288395	0.0808768			0.459132	0.459132	0.0237865
21.646									0.226299	0.148619	0.204283	0.142068	0.135457	0.349351	0.164713	0.216035			0.580195	0.0103841	0.144329	0.311893	0.176497	0.192508	0.188156	0.363435			0.420714	0.343119	0.162866	0.314388	0.395245	0.286275	0.346043	0.237652							0.316756	0.0792071			0.423718	0.423718	0
21.783									0.237474	0.177207	0.177488	0.12421	0.15998	0.365841	0.129004	0.227579			0.63804	0.0357842	0.131249	0.333792	0.164273	0.212262	0.161906	0.37667			0.424815	0.340933	0.18712	0.310672	0.315557	0.272658	0.358367	0.227563							0.353323	0.0782979			0.393442	0.393442	0.0396898
21.92									0.232509	0.181521	0.15619	0.136951			0.122268	0.284214			0.623876	0.0553083	0.107939	0.324833	0.171054	0.264318	0.135614	0.357196			0.423377	0.312634	0.217804	0.307324	0.240331	0.264982	0.408959	0.217021							0.343128	0.074173			0.408588	0.408588	0.0789814
22.057									0.255598	0.162988	0.149452	0.182298			0.146278	0.302962			0.566954	0.053601	0.122114	0.319034	0.227667	0.277092					0.412139	0.334407	0.25757	0.307324	0.209365	0.261296	0.424323	0.211379							0.31871	0.0914752			0.46252	0.46252
22.194									0.319002	0.176098	0.149567	0.210814							0.471086	0.071994	0.11899	0.318271	0.227142	0.249183					0.379335	0.37017	0.256987	0.316451	0.226624	0.284625	0.393202	0.18938							0.338275	0.0993742			0.494891	0.494891
22.331									0.369039	0.209018	0.144117	0.22004							0.403319	0.127555	0.0900717	0.317624	0.207737	0.258057					0.369362	0.374123	0.193705	0.34013	0.226222	0.325528	0.336869	0.186677							0.378869	0.099269			0.46119	0.46119
22.468									0.394958	0.228181	0.148289	0.237732							0.345816	0.165182	0.0908038	0.318349	0.164555	0.250159					0.337129	0.384679			0.191995	0.357581	0.287626	0.220769							0.425777	0.0834194			0.403937	0.403937
22.605									0.379048	0.238438	0.168943	0.268944							0.288609	0.157485	0.0937685	0.304652	0.140708	0.281075					0.293275	0.389065			0.151367	0.373051	0.284313	0.244454							0.473606	0.0699925			0.363089	0.363089
22.742									0.335339	0.244693	0.180478	0.284967							0.258351	0.162537	0.0720909	0.301387	0.146731	0.24217					0.28565	0.354953			0.156322	0.419567	0.323704	0.262794							0.457103	0.0825604			0.331055	0.331055
22.879									0.321672	0.249446	0.18281	0.281147							0.295004	0.195661	0.0373755	0.29645	0.10305	0.165585					0.296999	0.325299			0.178796	0.479225	0.336506	0.260028							0.395355	0.0702771			0.298639	0.298639
23.016									0.332208	0.259628	0.187905	0.297546							0.301373	0.218185	0.0315232	0.277759	0.0996492	0.165115					0.31392	0.318778			0.185022	0.528054	0.305471	0.263004							0.337292	0.0656797			0.273295	0.273295
23.153									0.3432	0.279143	0.200125	0.317145							0.326533	0.257513	0.0713979	0.277042	0.133673	0.186407					0.336635	0.292959			0.183402	0.534314	0.341124	0.265876							0.294484	0.0879797			0.264205	0.264205
23.29									0.357901	0.322592	0.200829	0.319734							0.335562	0.284917	0.14549	0.287838	0.142365	0.193442					0.357741	0.265562					0.395382	0.242047							0.304864	0.115641			0.290437	0.290437
23.427									0.375033	0.359682									0.307031	0.28148	0.202356	0.274685	0.17224	0.196116					0.375172	0.267676					0.376911	0.222067							0.387671	0.151746			0.35436	0.35436
23.564									0.364323	0.359162									0.280611	0.283279	0.211113	0.235715	0.183348	0.211826					0.364034	0.294192					0.36407	0.224361							0.431776	0.153726			0.38313	0.38313
23.701									0.336552	0.349003									0.241598	0.322279	0.26286	0.219111	0.221044	0.223882					0.320874	0.316343					0.329402	0.224482							0.40915	0.137668			0.378048	0.378048
23.838									0.345466	0.347565									0.193493	0.345428	0.315502	0.207286	0.250501	0.183801					0.287892	0.322395					0.289232	0.215292							0.39558	0.113202			0.368863	0.368863
23.975									0.39319	0.344718									0.167747	0.353399	0.329014	0.171196							0.292154	0.343068					0.253068	0.195601							0.487244	0.072326			0.356755	0.356755
24.112									0.458785	0.34045									0.161119	0.369325	0.281325	0.150915							0.301672	0.37396					0.221579	0.176943							0.579919	0.0849421			0.340924	0.340924
24.249									0.487948	0.326069									0.162473	0.387638	0.210578	0.177479							0.293758	0.372376					0.185601	0.178061							0.632557	0.117929			0.352196	0.352196
24.386									0.496137	0.304347									0.157893	0.378799	0.157547	0.201326							0.289734	0.34209					0.146574	0.19643							0.624805	0.121937			0.390566	0.390566
24.523																			0.138122	0.370526	0.161715	0.200032							0.326862	0.335788					0.113402	0.220445							0.593434	0.118145			0.446153	0.446153
24.66																			0.128382	0.362151	0.2036	0.195584							0.342346	0.335075					0.126883	0.215736							0.589934	0.121368			0.510483	0.510483
24.797																			0.0772947	0.382192									0.341691	0.345442					0.190028	0.180374							0.581481	0.114416			0.549004	0.549004
24.934																			0.0702462	0.425366									0.345443	0.353033					0.269226	0.170228							0.540055	0.117564			0.485341	0.485341
25.071																			0.0798775	0.448154									0.325408	0.37177					0.242355	0.178732							0.526821	0.131668			0.352209	0.352209
25.208																			0.0860806	0.474777									0.315047	0.393161					0.258188	0.218806							0.542134	0.147613			0.231069	0.231069
25.345																			0.0568805	0.45787									0.296017	0.416366					0.264111	0.241927							0.57187	0.159335			0.153146	0.153146
25.482																			0.0594427	0.458274									0.252246	0.43384					0.317867	0.217833							0.583211	0.181438			0.220396	0.220396
25.619																			0.0725438	0.516049									0.244038	0.443336					0.366279	0.192171							0.617677	0.186712			0.319569	0.319569
25.756																			0.0803288	0.526331									0.253217	0.457886					0.349155	0.186736							0.64993	0.183779			0.403889	0.403889
25.893																			0.0835185	0.53511									0.260782	0.478885					0.322648	0.190343							0.677145	0.204941			0.463961	0.463961
26.03																			0.0692452	0.536101									0.237784	0.477983					0.298946	0.207374							0.661625	0.227002			0.446859	0.446859
26.167																													0.186904	0.473597					0.279686	0.254751							0.577599	0.242964			0.367908	0.367908
26.304																													0.179484	0.492411					0.24846	0.272662							0.470415	0.251564			0.271671	0.271671
26.441																													0.173568	0.440453					0.219146	0.261845							0.400674	0.254748			0.183425	0.183425
26.578																													0.209669	0.418486					0.213237	0.240648							0.37729	0.263295			0.115393	0.115393
26.715																													0.225813	0.403223					0.225829	0.227919							0.378066	0.322029			0.0706095	0.0706095
26.852																													0.234537	0.361413					0.189388	0.237148							0.367382	0.357785			0.044667	0.044667
26.989																													0.223388	0.327912					0.183861	0.223525							0.425344	0.376857			0.0313569	0.0313569
27.126																													0.180433	0.337245					0.26599	0.216568							0.471988	0.413115			0.0591021	0.0591021
27.263																													0.129392	0.341759					0.261921	0.177525							0.510953	0.437421			0.109484	0.109484
27.4																																			0.288515	0.216866							0.490125	0.442397			0.149561	0.149561
27.537																																			0.30778	0.246001							0.422727	0.430345			0.172385	0.172385
27.674																																			0.268399	0.233639							0.37915	0.395372			0.184232	0.184232
27.811																																			0.221359	0.235153							0.367579	0.353958			0.200719	0.200719
27.948																																			0.2073	0.240913							0.347335	0.317746			0.237324	0.237324
28.085																																			0.221168	0.238918							0.338342	0.308155			0.253557	0.253557
28.222																																			0.243493	0.219689							0.318671	0.334234			0.222973	0.222973
28.359																																			0.261912	0.1968							0.307656	0.346385			0.186102	0.186102
28.496																																			0.271836	0.168715							0.305173	0.345879			0.160033	0.160033
28.633																																			0.241619	0.143708							0.322148	0.372063			0.134878	0.134878
28.77																																											0.324075	0.397073			0.103115	0.103115
28.907																																											0.323479	0.416129			0.0795121	0.0795121
29.044																																											0.317475	0.409956			0.0621453	0.0621453
29.181																																											0.269118	0.425779			0.0450818	0.0450818
29.318																																											0.224417	0.430056			0.0443553	0.0443553
29.455																																											0.20933	0.368966			0.0664408	0.0664408
29.592																																											0.211953	0.330117
29.729																																											0.210903	0.301053
29.866																																											0.215116	0.296464
30.003
[truncated: 25 more columns]
