# Supplementary material for: Progenitors oppositely polarize WNT activators and inhibitors to orchestrate tissue development
Source: eLife. 2020 Apr 20;9:e54304. doi: 10.7554/eLife.54304 (PMC7224699; doi:10.7554/eLife.54304)
Supplement: Figure 6—figure supplement 1—source data 1. [file elife-54304-fig6-figsupp1-data1.xlsx]

## Sheet: A
	Figure 6 - figure supplement 1 - Quantification of developing hair follicles at E15.5 after ectopic expression of WIF1
	Control (counts/mm2) - 20 mm2 headskin sampled										WIF1 OE (counts/mm2) - 18mm2 headskin sampled
	Embryo 1	Embryo 1	Embryo1	Embryo 2	Embryo 3	Embryo 3	Embryo 4	Embryo 4	Embryo 5	Embryo 5	Embryo 1	Embryo 1	Embryo 2	Embryo 2	Embryo 3	Embryo 3	Embryo 4	Embryo 4	Embryo 5
Placode	19.598	9.54774	15.5779	8.0402	1.00503	5.52764	16.5829	4.0201	15.0754	13.0653	4.0201	5.02513	1.50754	0.502513	0	10.0503	4.0201	0.502513	5.02513
Germ	7.03518	2.01005	4.0201	4.0201	4.0201	3.51759	5.52764	4.0201	3.01508	3.01508	3.51759	5.52764	5.02513	5.52764	0	5.02513	2.51256	5.52764	2.51256
Peg	5.02513	3.01508	3.51759	5.02513	0.502513	2.51256	3.01508	1.00503	3.51759	4.0201	3.01508	0	0	0	0	1.50754	0	0	1.00503
	Control = krt14TA negative
