# Supplementary material for: Progenitors oppositely polarize WNT activators and inhibitors to orchestrate tissue development
Source: eLife. 2020 Apr 20;9:e54304. doi: 10.7554/eLife.54304 (PMC7224699; doi:10.7554/eLife.54304)
Supplement: Figure 6—figure supplement 2—source data 1. [file elife-54304-fig6-figsupp2-data1.xlsx]

## Sheet: A
Figure 6 - figure supplement 2A - Quantification of developing hair follicles in explants after porcupine inhibitor (LGK974 1uM) treatment
	Placode	Placode	Placode	Placode	Placode	Germ	Germ	Germ	Germ	Germ	Peg	Peg	Peg	Peg	Peg
	Embryo 1	Embryo 2	Embryo 3	Embryo 4	Embryo 5	Embryo 1	Embryo 2	Embryo 3	Embryo 4	Embryo 5	Embryo 1	Embryo 2	Embryo 3	Embryo 4	Embryo 5
DMSO	15.9848	15.4545	15	23.5714	30.25	4.09091	5.54545	4.39394	7	9.16667	5.60606	3.45454	3.71212	6.42857	4.91667
LGK974	13.4545	10.0758	11.1364	11.4167	21.9167	4.90909	5.90909	4.92424	4.83333	7.5	3.36364	3.33333	2.04546	5.25	5.41667
	Each value represents the average number of the respective developing hair follicle per mm2 on a 6mm2 skin explant

## Sheet: C
Figure 6 - figure supplement 2C - LEF1 fluorescence intensity
		Normalized LEF1 fluorescence intensity (a.u.)
		Basal Cells DMSO	Basal Cells LGK974 (1uM)	Dermal DMSO	Dermal LGK974 (1uM)
	1	0.178915	0.0473017	0.330368	0.0809462
	2	0.169576	0.0421662	0.319091	0.0818733
	3	0.18287	0.0435437	0.292607	0.102241
	4	0.191167	0.0644464	0.32328	0.132258
	5	0.212197	0.0532333	0.267968	0.104219
	6	0.29875	0.0641015	0.508556	0.112956
	7	0.171454	0.0839647	0.307483	0.292103
	8	0.246177	0.0372509	0.440198	0.126607
	9	0.179826	0.0454957	0.365204	0.160471
	10	0.247896	0.0787835	0.600978	0.282674
	11	0.170597	0.0780008	0.358982	0.321737
	12	0.168768	0.0399545	0.253549	0.135888
	13	0.226166	0.0437132	0.394205	0.109601
	14	0.18794	0.0463107	0.298703	0.113511
	15	0.204446	0.033227	0.30082	0.102677
	16	0.138962	0.039506	0.252616	0.108666
	17	0.136173	0.0504734	0.243921	0.148327
	18	0.147055	0.0400469	0.235095	0.117404
	19	0.177599	0.0399411	0.373821	0.112286
	20	0.334624	0.0700281	0.681925	0.239657
	21	0.170593	0.0952481	0.278621	0.404517
	22	0.0948762	0.126133	0.275067	0.382031
	23	0.367708	0.0995049	0.693812	0.330221
	24	0.191098	0.0783878	0.40693	0.336119
	25	0.238091	0.0670673	0.564322	0.296835
	26	0.192049	0.076324	0.384599	0.329502
	27	0.217058	0.120729	0.472235	0.363052
	28	0.226195	0.0684188	0.45376	0.309874
	29	0.208954	0.0890636	0.460413	0.389904
	30	0.213707	0.0597538	0.514642	0.290572
	31	0.144405	0.0391062	0.284424	0.174954
	32		0.104695		0.449491
		Each color represents one embryo

## Sheet: E
Figure 6 - figure supplement 2E - LEF1 fluorescence intensity
		Normalized LEF1 fluorescence intensity (a.u.)
		Basal Cells DMSO	Basal Cells LGK974 (10uM)	Dermal DMSO	Dermal LGK974 (10uM)
	1	0.0432243	0.013433	0.10274	0.0406729
	2	0.0541252	0.0132035	0.0924006	0.0529646
	3	0.030934	0.0142051	0.0729436	0.0518811
	4	0.0394592	0.0156699	0.103042	0.0475245
	5	0.0379946	0.0181232	0.102282	0.0553371
	6	0.0416176	0.0143399	0.11399	0.0450096
	7	0.0393863	0.0166958	0.120887	0.0567446
	8	0.0674517	0.0115554	0.1418	0.0443903
	9	0.0501299	0.0116416	0.116848	0.041405
	10	0.0397885	0.015896	0.0799367	0.0553804
	11	0.0712841	0.0142636	0.175142	0.0599187
	12	0.0457387	0.0168584	0.0939502	0.0322815
	13	0.0573892	0.0150452	0.112574	0.0417493
	14	0.0454682	0.0162194	0.118254	0.0474839
	15	0.0523831	0.0209294	0.111912	0.0585846
	16	0.0419759	0.0154854	0.0769245	0.0448618
	17	0.0463666	0.0114938	0.0889556	0.0343669
	18	0.0671331	0.0149817	0.138753	0.0377449
	19	0.0511766	0.0145402	0.0902005	0.0395183
	20	0.0689926	0.0115593	0.151075	0.0329344
	21	0.0702134	0.0132378	0.142063	0.0286292
	22	0.109028	0.014883	0.201784	0.0338097
	23	0.0932347	0.00651863	0.180622	0.00837285
	24	0.0197278	0.00676588	0.0254167	0.00997151
	25	0.0180092	0.0068139	0.0275372	0.0108405
	26	0.011128	0.00679502	0.0159969	0.00951414
	27	0.0259001	0.00602049	0.0375933	0.00641816
	28	0.0188896	0.00508923	0.0260947	0.00571619
	29		0.00597947		0.00826096
	30		0.00467516		0.00754582
	31		0.00530353		0.00819033
	32
		Each color represents one embryo
