# Supplementary material for: Progenitors oppositely polarize WNT activators and inhibitors to orchestrate tissue development
Source: eLife. 2020 Apr 20;9:e54304. doi: 10.7554/eLife.54304 (PMC7224699; doi:10.7554/eLife.54304)
Supplement: Figure 6—figure supplement 3—source data 1. [file elife-54304-fig6-figsupp3-data1.xlsx]

## Sheet: A
Figure 6 - figure supplement 3A - LEF1 fluorescence intensity after porcupine inhibitor washout
		Normalized LEF1 fluorescence intensity (a.u.)
		Basal Cells (LGK974 1uM)	Basal Cells (LGK974 1uM WO)	Dermal Condensate (LGK974 1uM)	Dermal Condensate (LGK974 1uM WO)
	1	0.75703	0.873137	1.13248	1.45577
	2	0.814231	1.47311	1.16219	2.26098
	3	0.674402	0.654949	1.09674	1.00177
	4	0.636867	0.42416	0.944608	0.664111
	5	0.643703	0.475947	0.982946	0.593835
	6	0.32048	1.93071	0.677887	3.08315
	7	0.611544	1.69277	0.961056	1.9503
	8	0.489864	2.72253	0.952361	2.04839
	9	1.10003	1.50034	1.95859	1.26573
	10	0.760575	1.15115	1.07949	0.734032
	11	0.78174	2.42055	1.59249	3.2171
	12	0.643074	2.36119	1.11415	3.71264
	13	0.883904	1.37086	1.65845	1.71076
	14	0.91054	1.08053	1.83928	1.64768
	15	1.12263	2.20085	1.93535	4.48755
	16	0.560987	2.22935	1.04471	3.65892
	17	0.852923	1.15929	1.47918	1.82347
	18	0.910767	0.994262	1.63243	1.23253
	19	1.28957	1.83585	2.23758	2.45827
	20	0.468882	2.58546	1.04922	3.7132
	21	1.37575	1.06449	2.05872	1.48045
	22	0.511698	0.844129	0.930255	1.94599
	23	0.634494	1.37802	0.801959	1.83635
	24	1.11511	0.898035	1.98145	4.16842
	25	0.978922	0.590684	1.67909	1.05683
	26	0.629913	0.278446	1.13408	0.598989
	27	0.534147	0.31657	0.894533	0.613925
	28	0.913863	0.499615	1.58462	1.52169
	29	0.616919	1.03466	1.03165	2.40124
	30	1.08776	0.848432	1.79634	0.796268
	31	0.771175	1.46468	1.39936	2.00154
	32	0.981458	2.50881	1.69198	3.24626
	33	0.353299	0.619058	0.723961	0.794142
	34	0.402102	1.10699	0.829971	1.40261
	35	0.488666	0.65747	1.29328	0.813152
	36	0.435639	0.639869	0.764969	0.727845
	37	0.40008	0.484166	0.650419	0.623712
	38	0.741416	0.721878	1.35925	0.782356
	39	0.850243	0.783395	1.50439	0.863997
	40	0.451757	1.13893	0.614431	2.20956
	41	0.661114	0.919963	0.887232	1.04141
	42	0.498938	0.900102	0.775631	1.61168
	43	0.396922	0.764359	0.710742	1.2769
	44	0.596679	0.910664	1.05724	0.997227
	45	0.402215	0.881623	0.68054	1.15415
	46	0.36176	0.636653	0.721592	0.715685
	47	0.631143	0.732935	1.02911	0.784226
	48	0.507334	0.636429	0.769896	0.60959
	49	0.460197	0.583076	0.787449	0.727849
	50	0.600409	0.640173	1.08941	0.608402
	51	0.50071	0.665091	0.78522	0.69006
	52	0.404786	0.640971	0.680351	0.729113
	53	0.602879	0.503073	0.896236	0.658405
	54	0.282982	1.17187	0.546416	0.398159
	55	0.300616	0.62252	0.568173	0.499014
	56	0.288191	0.298049	0.484227	0.337512
	57	0.282741	0.265983	0.518647	0.320967
	58	0.152483	0.289666	0.159445	0.399482
	59	0.119614	0.250298	0.178173	0.307023
	60	0.113753	0.26965	0.189089	0.388679
	61	0.11466	0.281339	0.217153	0.377793
	62	0.108591	0.303071	0.225784	0.451235
	63	0.14198	0.271355	0.199614	0.389066
	64	0.123479	0.223814	0.191475	0.325151
	65	0.158849	0.229782	0.197086	0.269446
	66	1.32017	0.257849	1.86584	0.329377
	67	0.105585	0.255503	0.214453	0.343224
	68	0.0993191	0.214242	0.174718	0.275379
	69	0.103801	0.28883	0.195623	0.335131
	70	0.120122	0.312972	0.27717	0.355076
	71	0.114899	0.314644	0.255282	0.455095
	72	0.0985988	0.334182	0.252817	0.381847
	73	0.114663	0.334283	0.25047	0.384292
	74	0.0998494	0.223038	0.134859	0.210348
	75	0.081372	0.161727	0.124077	0.125576
	76	0.0730163	0.157	0.171916	0.171702
	77	0.0618159	0.234636	0.136545	0.231636
	78	0.0784718	0.190433	0.125692	0.18025
	79	0.0908224	1.90714	0.139126	2.62695
	80	0.0738097	1.58429	0.122333	2.03061
	81	0.0768816	1.4803	0.131022	1.73388
	82	0.767405	1.53875	1.5505	2.44552
	83	0.523248	0.944303	1.24454	1.59847
	84	0.328769	0.896463	0.775878	1.20859
	85	0.872062	1.93194	2.34056	2.12663
	86	0.500565	1.24481	0.861236	1.83401
	87	0.449068	1.21605	0.902216	2.00001
	88	0.457234	1.10982	0.931197	2.03164
	89	0.362155	1.14347	0.745387	1.7563
	90	0.447549	1.66949	0.800003	3.38367
	91	0.486963	1.87976	0.913246	3.11311
	92	0.498903	1.98671	0.791355	3.62394
	93	0.351794	2.07861	0.609267	3.23713
	94	0.37975	1.67924	0.632349	2.16403
	95	0.665084	2.04565	1.73006	3.85445
	96	1.15117	1.78999	1.37009	2.97387
	97	1.16189	1.44149	1.45403	2.48764
	98	0.992752	1.32757	2.63658	1.74754
	99	1.02853	0.838871	1.8592	1.21977
	100	0.879044	0.694683	1.99111	0.950759
	101	0.761695	1.29672	1.57927	1.97302
	102	0.457368	2.71945	0.922913	3.88525
	103	0.0695041	0.210221	0.112338	0.344004
	104	0.0721878	0.174032	0.123657	0.333897
	105	0.065247	0.246577	0.158437	0.415584
	106	0.0777968	0.174752	0.179644	0.316038
	107	0.0715811	0.230285	0.166398	0.412216
	108	0.0552946	0.212115	0.138854	0.390383
	109	0.0801158	0.249849	0.158542	0.36
	110	0.0625518		0.113603
		WO - washout
		Each Color represents one embryo
