# Supplementary material for: Progenitors oppositely polarize WNT activators and inhibitors to orchestrate tissue development
Source: eLife. 2020 Apr 20;9:e54304. doi: 10.7554/eLife.54304 (PMC7224699; doi:10.7554/eLife.54304)
Supplement: Figure 6—figure supplement 5—source data 1. [file elife-54304-fig6-figsupp5-data1.xlsx]

## Sheet: 5B
Figure 6 - figure supplement 5B Plot Intensity Profile NOTUM-AQP4-MYC (Normalized Pixel Intensity measured from basal to apical side of progenitor cells )
	Cell 1		Cell 2		Cell 3		Cell 4		Cell 5		Cell 6		Cell 7		Cell 8		Cell 9		Cell 10		Cell 11		Cell 12		Cell 13		Cell 14		Cell 15		Cell 16		Cell 17		Cell 18		Cell 19		Cell 20		Cell 21		Cell 22		Cell 23		Cell 24		Cell 25
	Normalized Pixel Intensity	Normalized Pixel Intensity	Normalized Pixel Intensity	Normalized Pixel Intensity	Normalized Pixel Intensity	Normalized Pixel Intensity	Normalized Pixel Intensity	Normalized Pixel Intensity	Normalized Pixel Intensity	Normalized Pixel Intensity	Normalized Pixel Intensity	Normalized Pixel Intensity	Normalized Pixel Intensity	Normalized Pixel Intensity	Normalized Pixel Intensity	Normalized Pixel Intensity	Normalized Pixel Intensity	Normalized Pixel Intensity	Normalized Pixel Intensity	Normalized Pixel Intensity	Normalized Pixel Intensity	Normalized Pixel Intensity	Normalized Pixel Intensity	Normalized Pixel Intensity	Normalized Pixel Intensity	Normalized Pixel Intensity	Normalized Pixel Intensity	Normalized Pixel Intensity	Normalized Pixel Intensity	Normalized Pixel Intensity	Normalized Pixel Intensity	Normalized Pixel Intensity	Normalized Pixel Intensity	Normalized Pixel Intensity	Normalized Pixel Intensity	Normalized Pixel Intensity	Normalized Pixel Intensity	Normalized Pixel Intensity	Normalized Pixel Intensity	Normalized Pixel Intensity	Normalized Pixel Intensity	Normalized Pixel Intensity	Normalized Pixel Intensity	Normalized Pixel Intensity	Normalized Pixel Intensity	Normalized Pixel Intensity	Normalized Pixel Intensity	Normalized Pixel Intensity	Normalized Pixel Intensity
(basal to apical distance um)	MYC - Tag	DAPI	MYC - Tag	DAPI	MYC - Tag	DAPI	MYC - Tag	DAPI	MYC - Tag	DAPI	MYC - Tag	DAPI	MYC - Tag	DAPI	MYC - Tag	DAPI	MYC - Tag	DAPI	MYC - Tag	DAPI	MYC - Tag	DAPI	MYC - Tag	DAPI	MYC - Tag	DAPI	MYC - Tag	DAPI	MYC - Tag	DAPI	MYC - Tag	DAPI	MYC - Tag	DAPI	MYC - Tag	DAPI	MYC - Tag	DAPI	MYC - Tag	DAPI	MYC - Tag	DAPI	MYC - Tag	DAPI	MYC - Tag	DAPI	MYC - Tag	DAPI	MYC - Tag
0	0.172231	0.0456797	0.158355	0.0939542	0.151536	0.104169	0.0924697	0.426511	0.0943453	0.0652162	0	0.772381	0.0257938	0.151583	0.0148889	0.336109	0.00819618	0.2277	0.188947	0.187713	0.11822	0.0504619	0.0620083	0.165068	0.0676194	0.525772	0.00861652	0.510885	0.0339116	0.0804839	0.146195	0.463476	0.161045	0.38983	0.00380339	0.637065	0.0993578	0.506184	0.190271	0.431021	0	0.16089	0.0567078	0.348948	0	0.71945	0.00657796	0.519	0.00778051
0.137	0.118267	0.0709691	0.170647	0.218134	0.202514	0.0834734	0.0873084	0.35019	0.290366	0.155202	0.0263949	0.881006	0.054868	0.169638	0.0855703	0.254139	0	0.230858	0.179047	0.125936	0.175106	0.049573	0.106628	0.137952	0.0667161	0.525008	0	0.398	0.0686344	0	0.0772448	0.374019	0.13466	0.325702	0.0645071	0.603827	0.0883699	0.431195	0.243915	0.438637	0.0275482	0.217085	0.129862	0.290178	0.0255679	0.609017	0.0616313	0.492814	0.0599533
0.274	0.169966	0.0064803	0.185058	0.198197	0.132078	0.0101551	0.112562	0.326237	0.347569	0.0434258	0.0429368	0.940635	0.0537537	0.166038	0.264558	0.289942	0.0283103	0.233798	0.14487	0.0702965	0.260948	0.0124664	0.0870516	0.120363	0	0.527847	0.0129231	0.387026	0.0678291	0.100144	0.130604	0.314871	0.106426	0.312601	0.0842263	0.522261	0.0986392	0.364741	0.307907	0.464188	0.0227622	0.265609	0.178329	0.174073	0.0307132	0.602017	0.0652016	0.504629	0
0.411	0.239389	0	0.162576	0.15001	0.223218	0.0715797	0.178255	0.386661	0.368662	0	0.0326909	0.904585	0.078267	0.143848	0.20796	0.275252	0.0497657	0.213262	0.137346	0.0438806	0.420425	0	0.0696093	0.0822561	0.0182022	0.516721	0.00177731	0.481653	0.140265	0.171874	0.164349	0.261893	0.0659844	0.241847	0.0189394	0.453711	0.0447316	0.385225	0.459076	0.417589	0.0777159	0.236001	0.193147	0.175072	0.0232827	0.540501	0.0604958	0.468223	0.0855732
0.548	0.318167	0.00371646	0.111559	0.235805	0.160095	0	0.199433	0.454983	0.59965	0.0514207	0.0200989	0.886348	0.0599112	0.0847553	0.177184	0.3414	0.0549256	0.187772	0.189811	0.0472135	0.522509	0.0214174	0.0558475	0.0235866	0.00234265	0.508085	0.0274799	0.434033	0.227214	0.183267	0.194122	0.238845	0.18109	0.299192	0.0385629	0.451338	0.0465435	0.513086	0.557327	0.369172	0.074093	0.215306	0.106083	0.176878	0.0261852	0.622356	0.0685827	0.42829	0.0157443
0.685	0.395273	0.0937279	0.112762	0.153193	0.248325	0.0431563	0.241081	0.40767	0.678858	0.0182649	0.0770405	0.865269	0.0764751	0.0634302	0.0698745	0.32967	0.0611472	0.18585	0.26238	0.0443998	0.612389	0.024197	0.0658259	0	0.0156964	0.556612	0.0254531	0.451362	0.316407	0.206732	0.189256	0.286448	0.209422	0.23867	0.0941133	0.473293	0.140871	0.430417	0.767202	0.264981	0.0300837	0.202133	0.114319	0.168416	0.0374867	0.596198	0.0437337	0.280974	0.0397064
0.822	0.552041	0.146283	0.0967727	0.111485	0.234274	0.031216	0.236433	0.359923	0.590708	0.0779939	0.0809363	0.705236	0.0456215	0.0540982	0.113881	0.238998	0.0987602	0.167518	0.339193	0.0528408	0.677204	0.0333253	0.0871164	0.00582111	0.0127593	0.490274	0.030163	0.394798	0.297489	0.262392	0.17385	0.241584	0.272098	0.280334	0.0407655	0.474291	0.115683	0.399968	0.847104	0.339808	0.0677296	0.0936277	0.139523	0.255425	0.0555335	0.501549	0.0430125	0.361615	0.0390608
0.959	0.973505	0.20018	0.0971935	0.113212	0.160755	0.0249697	0.30117	0.312252	0.685507	0.0774445	0.079556	0.576271	0.0201062	0.054692	0.17543	0.274287	0.133732	0.101638	0.414004	0.0642193	0.63571	0.0260527	0.0986532	0.0240322	0.031046	0.46299	0.0239185	0.407931	0.221145	0.298461	0.120323	0.178223	0.389451	0.318592	0.0223916	0.472389	0.147228	0.448976	0.806968	0.435806	0.0831302	0.0602063	0.0925932	0.168209	0.078482	0.478155	0.00374422	0.319798	0.0749145
1.096	1.24057	0.166515	0.100691	0.0633516	0.219114	0.0223444	0.386119	0.242891	0.508055	0.0760322	0.0975106	0.468352	0.0497416	0.0646479	0.183994	0.340916	0.236963	0.0997133	0.450295	0.0293292	0.54755	0.0205688	0.147121	0.0400102	0.0656905	0.38132	0.0427716	0.442764	0.309959	0.331808	0.260261	0.142546	0.455297	0.249528	0	0.421747	0.0384238	0.367906	0.884425	0.517592	0.0777293	0.0271944	0	0.184339	0.121241	0.491232	0.0893242	0.330891	0.0732818
1.233	1.39478	0.197808	0.066898	0.0215271	0.332995	0.0409822	0.525473	0.092685	0.450398	0.202309	0.120136	0.407624	0.0621937	0.0555714	0.0902262	0.357907	0.315709	0.104793	0.434365	0.00758966	0.556272	0.0374664	0.249622	0.0473448	0.0335606	0.420548	0.0634567	0.431318	0.200538	0.403637	0.286877	0.0509161	0.48986	0.289183	0.0304088	0.418782	0.058643	0.321643	0.880136	0.513108	0.0498603	0.00801631	0.0297479	0.191297	0.133092	0.429584	0.112148	0.295634	0.0750645
1.37	1.34948	0.221043	0.147953	0.0145281	0.447425	0.0636416	0.50436	0.0688783	0.334044	0.143443	0.166972	0.316607	0.0954338	0.0394968	0.111283	0.305816	0.443357	0.0968231	0.401981	0.00226422	0.521624	0.0722204	0.37658	0.0659708	0.0166375	0.422259	0.0504174	0.291113	0.135457	0.454668	0.191155	0.0366224	0.455603	0.327069	0.0532884	0.418968	0.0826579	0.348154	0.716603	0.438435	0.0822345	0.0412196	0.0183818	0.159266	0.170219	0.297979	0.0881836	0.258931	0.0584288
1.507	1.30625	0.276916	0.27736	0.0110352	0.429124	0.0419039	0.410099	0.100063	0.331061	0.0893593	0.332755	0.258206	0.146963	0.0396021	0.166904	0.276502	0.632529	0.0743325	0.374018	0	0.399382	0.114679	0.44409	0.075869	0.0370949	0.45942	0.0712803	0.180487	0.204524	0.452649	0.232202	0.0356373	0.469072	0.270692	0.0469267	0.317826	0.056131	0.267094	0.739712	0.463211	0.0391877	0.0273018	0.0341084	0.109423	0.232065	0.218371	0.0963267	0.282608	0.0674297
1.644	1.27759	0.208083	0.358994	0.053063	0.501958	0.0210881	0.40229	0.0554583	0.416692	0.052361	0.415295	0.186787	0.194539	0.02408	0.023114	0.327767	0.91121	0.0698383	0.320519	0.00321821	0.320238	0.16607	0.489006	0.0931428	0.0303496	0.46489	0.16181	0.14057	0.200011	0.416816	0.197332	0.00701056	0.407139	0.24673	0.0837657	0.41699	0.046998	0.300853	0.699669	0.59958	0.0509788	0	0.0443308	0.0446655	0.273105	0.197671	0.0612323	0.198965	0.0676172
1.781	0.974785	0.161771	0.459939	0	0.476233	0.100793	0.245536	0.0760653	0.308249	0.0939061	0.653631	0.136071	0.324501	0.00565261	0.119238	0.311814	1.17887	0.076664	0.244404	0.0382864	0.251249	0.201934	0.49953	0.133294	0.0294755	0.421647	0.21581	0.10988	0.124437	0.460134	0.189528	0.062156	0.289262	0.297957	0.109008	0.344934	0.0701776	0.283886	0.492192	0.73574	0.103174	0.0448081	0.0780154	0.0258294	0.358681	0.153143	0.0708231	0.205455	0.0160317
1.918	0.895616	0.221438	0.434258	0.0394948	0.454267	0.220394	0.178803	0.00867729	0.265838	0.169153	0.861043	0.130859	0.394096	0	0.133954	0.306028	1.33208	0.0623844	0.187509	0.0573119	0.159006	0.242169	0.556996	0.172538	0.0210926	0.48115	0.186484	0.0293196	0.0653184	0.559904	0.160256	0	0.308344	0.323489	0.128458	0.377699	0.0686544	0.249445	0.468264	0.839772	0.0616781	0.065668	0.0500597	0.0226969	0.430653	0.159488	0.0529613	0.210478	0.0634395
2.055	0.876608	0.189037	0.311067	0.128086	0.577744	0.207447	0.402036	0.0353182	0.450511	0.109973	0.987766	0.167246	0.371981	0.0720557	0.0688051	0.19561	1.40741	0.0448547	0.1734	0.112329	0.175475	0.258712	0.606599	0.171481	0.0401631	0.35254	0.330391	0.0305267	0.0232295	0.617188	0.229495	0.019275	0.372109	0.361176	0.0645344	0.338585	0.0541594	0.187376	0.450087	0.840399	0.0635408	0.0679003	0.0533889	0.0628052	0.493472	0.145162	0.0194014	0.20812	0.0417265
2.192	0.986998	0.159639	0.261914	0.0782896	0.609384	0.223136	0.394958	0.027051	0.507138	0.142738	0.762303	0.158142	0.275072	0.074307	0.0536455	0.114473	1.41094	0.029438	0.234582	0.132892	0.199463	0.296041	0.914305	0.155866	0.0370192	0.398719	0.424712	0.0231358	0.0309272	0.614706	0.251805	0.0766434	0.281521	0.366908	0.0897581	0.393728	0.048429	0.15933	0.489476	0.890879	0.0956343	0.037631	0.0984345	0.102761	0.621972	0.149934	0.0811708	0.16222	0.104316
2.329	1.13372	0.30181	0.333526	0.138338	0.43583	0.295338	0.359467	0.0345589	0.3862	0.070154	0.5752	0.0819203	0.341722	0.106464	0.141811	0.151844	1.35808	0	0.233199	0.16188	0.200677	0.339078	1.19426	0.180774	0.0289393	0.255799	0.55157	0.0457348	0.0403363	0.650086	0.237328	0.0572929	0.25014	0.377285	0.10115	0.363113	0.143187	0.132234	0.604124	1.02284	0.105514	0.0279094	0.20776	0.116897	0.752323	0.141298	0	0.192091	0.0905797
2.466	0.928408	0.277785	0.271795	0.129559	0.378125	0.202157	0.244426	0	0.37015	0.128865	0.339624	0.0677643	0.363454	0.166726	0.118458	0.294007	1.35744	0.0265056	0.197367	0.16857	0.201113	0.410654	1.25534	0.229538	0.0117657	0.155502	0.82734	0.0531713	0.0627663	0.750229	0.364867	0.0338182	0.245944	0.386198	0.0811617	0.362169	0.241881	0.064413	0.733903	1.03994	0.157816	0.0651611	0.308804	0.0963243	1.05624	0.146672	0.0361634	0.206281	0.162945
2.603	0.755684	0.28316	0.444022	0.134732	0.506491	0.273803	0.200647	0.0976834	0.187656	0.101978	0.268566	0.0898953	0.34183	0.183672	0.174335	0.205122	1.3064	0.0864295	0.177241	0.185548	0.221043	0.415754	1.10067	0.253683	0.0402505	0.0923193	0.938521	0	0.0851431	0.819695	0.333292	0.0426282	0.251154	0.410518	0.174468	0.346107	0.365825	0.0595919	0.792081	0.983426	0.0252755	0.0369764	0.465927	0.101327	1.52624	0.199762	0.104352	0.172594	0.100443
2.74	0.445002	0.290036	0.526927	0.152286	0.466721	0.319865	0.159407	0.111262	0.224911	0.091476	0.259563	0.0808252	0.48945	0.298878	0	0.22699	1.21936	0.114169	0.186135	0.206599	0.202357	0.371614	1.02343	0.265228	0.10722	0.0530507	1.09247	0.039174	0.0816081	0.778054	0.438082	0.0807939	0.276156	0.438698	0.21159	0.327349	0.479401	0.0605018	0.875832	1.08148	0.0781482	0.0588803	0.69521	0.0830948	1.72122	0.228795	0.218541	0.162245	0.0626815
2.877	0.316201	0.241511	0.655339	0.093231	0.422612	0.175822	0.112124	0.113349	0.143179	0.187259	0.16876	0.0483793	0.579076	0.383652	0.0933264	0.328732	1.15059	0.16069	0.166685	0.206295	0.137887	0.374173	1.1699	0.310281	0.187742	0.0272077	1.28513	0.0366381	0.101385	0.662664	0.435421	0.13169	0.1837	0.500228	0.196226	0.287999	0.488731	0.0423829	0.819404	1.16497	0.0932992	0.063637	0.741424	0.0585629	1.97409	0.186395	0.24451	0.0801237	0.129436
3.014	0.257905	0.343932	0.839745	0.0961839	0.339554	0.190088	0.147158	0.134386	0.151091	0.219788	0.153263	0.190402	0.755375	0.380397	0.0845867	0.212687	1.08402	0.21172	0.126555	0.223865	0.127266	0.345206	1.21628	0.355464	0.349251	0.0537713	1.22711	0.0668373	0.153375	0.568558	0.377883	0.0679089	0.25497	0.546519	0.240621	0.208271	0.536214	0.0419398	0.674623	0.903648	0.192293	0.0544122	0.727327	0	1.93743	0.164905	0.36632	0.0548651	0.0832157
3.151	0.192911	0.32038	1.03648	0.0936842	0.316918	0.160868	0.204116	0.154202	0.306874	0.235546	0.140667	0.154754	0.813665	0.449769	0.138535	0.184251	1.05829	0.262859	0.185725	0.211729	0.118306	0.333586	1.11547	0.41022	0.518041	0.0910746	1.08362	0.0198764	0.1644	0.668951	0.331284	0.0994285	0.299065	0.512006	0.278413	0.183526	0.519526	0.022613	0.603168	0.941882	0.387492	0.0489808	0.823765	0.0314901	1.74897	0.140089	0.476258	0.0829835	0.170113
3.288	0.111573	0.385818	1.0623	0.144421	0.379345	0.163151	0.275767	0.169721	0.263773	0.200822	0.130782	0.115584	0.711683	0.522272	0.163281	0.267238	0.927968	0.285903	0.176904	0.1872	0.134178	0.367287	0.974778	0.486504	0.779157	0.039425	1.01214	0.0324991	0.168516	0.700548	0.395304	0.0659157	0.238026	0.411194	0.388452	0.105104	0.663192	0	0.714948	0.983855	0.637284	0.0593503	0.93525	0.104431	1.79911	0.0611141	0.63996	0.0707904	0.274405
3.425	0.187888	0.508704	1.08411	0.113492	0.44329	0.135933	0.182715	0.190003	0.162551	0.261724	0.153025	0.20725	0.792698	0.538678	0.165042	0.36284	0.774017	0.342125	0.221657	0.232384	0.106537	0.387386	0.90358	0.543624	1.12884	0.0267128	0.895391	0.0344943	0.119753	0.697833	0.310873	0.166658	0.142095	0.416933	0.594409	0.025898	0.887483	0.0261946	0.812624	0.974649	0.983699	0.123044	0.917828	0.131548	2.017	0.166351	0.704292	0.0659137	0.393762
3.562	0.194485	0.476302	1.0716	0.113902	0.47549	0.214494	0.184472	0.334419	0.183416	0.287199	0.144444	0.295501	0.778695	0.53053	0.276705	0.314797	0.648474	0.392214	0.266976	0.265979	0.0860501	0.389986	0.883535	0.534392	1.55922	0.030374	0.714926	0.0564993	0.0796007	0.774147	0.322827	0.193019	0.135179	0.392643	0.87342	0.0963553	0.758091	0.0370369	0.738975	1.01235	1.26117	0.106827	1.00127	0.152817	2.27619	0.229109	0.733034	0.0523439	0.47744
3.699	0.144066	0.492189	0.909363	0.161362	0.324671	0.071677	0.181774	0.467924	0.154871	0.305309	0.0871566	0.354382	0.754914	0.458248	0.289658	0.31797	0.641787	0.428733	0.298095	0.255419	0.145714	0.383691	0.86663	0.506024	1.75881	0.0426713	0.594626	0.143026	0.125681	0.786545	0.271921	0.153733	0.149115	0.345968	0.941402	0	0.585595	0.0426282	0.60568	1.00187	1.26948	0.0988578	1.25409	0.152756	2.26257	0.200093	0.795642	0.0134932	0.794408
3.836	0.0847854	0.522377	0.702601	0.151103	0.246472	0.165259	0.120894	0.406415	0.154413	0.332977	0.118024	0.297299	0.719732	0.50557	0.267959	0.369156	0.666588	0.422297	0.297518	0.237067	0.166535	0.376235	0.871396	0.497552	1.71061	0.0321864	0.448145	0.133389	0.135563	0.725244	0.320743	0.25221	0.228458	0.366326	1.14751	0.0389949	0.556218	0.0614882	0.36667	1.01533	1.23148	0.0783605	1.34637	0.162326	2.23555	0.200918	0.900516	0.0287586	1.13172
3.973	0.0501243	0.526172	0.659076	0.149743	0.327493	0.186226	0.21192	0.42941	0.271566	0.391607	0.027959	0.316005	0.785593	0.471384	0.364605	0.368669	0.616822	0.412832	0.271866	0.254211	0.132685	0.377508	0.929701	0.489536	1.41789	0.00918207	0.434278	0.194301	0.0662422	0.72753	0.220808	0.365426	0.179925	0.374525	1.37118	0.042073	0.500959	0.0565404	0.307687	1.05456	1.19715	0.0764403	1.45949	0.174821	2.5229	0.277091	1.05625	0.0739197	1.3971
4.11	0.133925	0.49851	0.687734	0.198764	0.235682	0.242291	0.178116	0.363971	0.283376	0.469915	0.0435206	0.335799	0.535791	0.474691	0.40655	0.295101	0.534588	0.44856	0.264741	0.295366	0.0968931	0.385522	1.13759	0.438808	1.18955	0.0478974	0.371987	0.24178	0.0740406	0.699737	0.29239	0.391318	0.125692	0.523834	1.23496	0.0127977	0.514582	0.103431	0.232178	1.18613	1.13024	0.0839229	1.44383	0.213892	2.48675	0.282245	1.18838	0.071307	1.73034
4.247	0.137865	0.528304	0.730458	0.213992	0.208403	0.22433	0.199124	0.372202	0.245889	0.444282	0.137013	0.333882	0.395268	0.480081	0.412413	0.328354	0.481261	0.508091	0.212057	0.324025	0.0863537	0.389301	1.23658	0.39394	1.363	0.0880248	0.33453	0.283547	0.0566022	0.79625	0.261681	0.45018	0.130511	0.556698	1.07525	0.0565427	0.450289	0.206249	0.170506	1.1477	1.33363	0.09158	1.21192	0.211691	2.58726	0.319919	1.41088	0.0803041	1.87482
4.384	0.0943378	0.586626	0.832217	0.207906	0.195269	0.256989	0.112358	0.319383	0.231673	0.454393	0.113425	0.345465	0.244713	0.348425	0.416973	0.233554	0.425512	0.580216	0.132158	0.344678	0.0827765	0.414443	1.16121	0.395907	1.85449	0.0661305	0.351292	0.266252	0.00984721	0.873959	0.2027	0.494647	0.147726	0.565164	1.11514	0.0404408	0.339071	0.202934	0.207519	0.955547	1.32954	0.0590481	0.905753	0.261929	2.41083	0.32792	1.49925	0.072187	1.54664
4.521	0.125357	0.43766	0.826715	0.220751	0.193771	0.270937	0.154698	0.286801	0.114979	0.444127	0.0848393	0.261844	0.151961	0.476258	0.311158	0.202115	0.373392	0.64701	0.146765	0.31617	0.063656	0.446409	0.95034	0.41861	2.29187	0.0260577	0.233214	0.300198	0.0478327	0.860131	0.198146	0.487788	0.101129	0.549227	1.11055	0.0564397	0.494308	0.302039	0.296603	1.06209	1.48538	0.0412129	0.780598	0.314595	2.00929	0.441947	1.2462	0.164304	1.5555
4.658	0.0935505	0.6018	0.51444	0.227113	0.155996	0.296424	0.119411	0.264923	0.165647	0.477987	0.068874	0.304831	0.113877	0.391552	0.13697	0.23566	0.330202	0.723799	0.150841	0.299499	0.0855543	0.436943	0.902425	0.509484	2.50504	0.0925194	0.190767	0.302651	0.0298199	0.822075	0.179565	0.436858	0.0991812	0.539368	1.21552	0.107228	0.434234	0.309817	0.0863526	0.998092	1.29894	0.0530728	0.561957	0.33145	1.75345	0.455858	1.18099	0.209267	1.54991
4.795	0.111965	0.562918	0.428593	0.275243	0.131261	0.318577	0.0555744	0.228395	0.24268	0.493195	0.114654	0.319187	0.100273	0.382273	0.20926	0.162526	0.369331	0.752698	0.13371	0.304758	0.117375	0.454702	0.883947	0.714831	2.38879	0.0227568	0.246284	0.327519	0.0466484	0.810325	0.1277	0.572922	0.0310125	0.578914	1.24909	0.2002	0.10023	0.278448	0.117217	1.09386	1.17938	0.074406	0.469114	0.461316	1.55753	0.514294	1.27155	0.266181	1.54182
4.932	0.096409	0.562759	0.275541	0.239068	0.1651	0.27068	0.0603922	0.278311	0.229155	0.453612	0.111494	0.36511	0.145047	0.437006	0.288446	0.197788	0.497217	0.739014	0.140388	0.30647	0.0865156	0.443514	0.767394	0.826599	2.3448	0	0.174002	0.40423	0.00441141	0.741352	0.179137	0.578909	0.00784966	0.517347	1.36072	0.264275	0.1854	0.308599	0	0.800783	1.18341	0.110463	0.407341	0.507276	1.33659	0.565192	0.97629	0.32289	1.64979
5.069	0.142593	0.522931	0.204884	0.304646	0.133936	0.246227	0.0782849	0.400479	0.223767	0.369975	0.0615545	0.405081	0.0758099	0.53292	0.230385	0.203865	0.69501	0.698217	0.160871	0.343702	0.0591124	0.420784	0.671736	0.97089	2.31781	0.0538077	0.222003	0.338611	0.0158574	0.819547	0.227613	0.57529	0.075004	0.515743	1.61706	0.254482	0.215919	0.347387	0.132125	0.848039	1.28905	0.113826	0.465049	0.571337	1.13334	0.761694	0.944081	0.408412	1.34518
5.206	0.267062	0.644317	0.257177	0.320864	0.0783461	0.310729	0.124542	0.382142	0.195912	0.39247	0.0445802	0.425715	0.0754398	0.622787	0.161043	0.323338	0.88376	0.661101	0.139143	0.366414	0.029584	0.460049	0.61071	1.16911	2.17672	0.0942481	0.255973	0.406903	0.0715299	0.899003	0.309216	0.592168	0.0221312	0.578129	1.59739	0.303273	0.0919077	0.26856	0.201491	0.965854	1.42674	0.106236	0.288298	0.591547	1.02237	0.855772	0.912183	0.503235	0.923499
5.343	0.133828	0.616974	0.301281	0.310779	0.0777232	0.21274	0.0901603	0.38109	0.200038	0.342226	0.0914164	0.56104	0	0.622572	0.132752	0.256205	1.03954	0.663592	0.202257	0.344614	0.0392227	0.446272	0.517143	1.18258	2.12096	0.0938587	0.228094	0.425302	0.0774868	0.942072	0.372203	0.550774	0.0689294	0.591451	1.39364	0.319817	0.0624387	0.348953	0.168814	1.01232	1.51197	0.106283	0.118077	0.507231	0.851216	0.830754	0.785381	0.629086	0.783729
5.48	0.123686	0.577142	0.234808	0.330699	0.0497372	0.31179	0.0817291	0.426694	0.176767	0.397331	0.0835383	0.615497	0.138386	0.801223	0.102215	0.212435	1.20041	0.68165	0.167328	0.362435	0.05891	0.458731	0.403829	1.09233	2.17804	0.130114	0.256602	0.557011	0.0389862	0.915915	0.212478	0.480445	0.0900578	0.657232	1.53082	0.352037	0.0253231	0.358023	0.136748	0.958483	1.56078	0.0891395	0.120574	0.57896	0.58079	0.944392	0.742609	0.730207	0.829066
5.617	0.103596	0.628907	0.218122	0.411215	0.0778226	0.403797	0.0105316	0.42014	0.136761	0.401796	0.0794623	0.629197	0.167173	0.851435	0.242618	0.233624	1.18759	0.663679	0.1306	0.384223	0.063322	0.485227	0.313032	1.03271	2.10609	0.199243	0.232735	0.497618	0.0424975	0.881885	0.165919	0.351855	0.157028	0.719584	1.29783	0.373195	0.194201	0.391389	0.143904	1.05529	1.47552	0.137889	0.0527353	0.466945	0.54701	0.981522	0.624328	0.731574	0.794429
5.754	0.137865	0.650875	0.207942	0.400144	0.0867849	0.43131	0.0335806	0.560503	0.272714	0.329448	0.0857907	0.603505	0.168882	0.703381	0.207779	0.356269	1.00514	0.618729	0.132869	0.402741	0.0391367	0.504265	0.281901	0.993975	1.64326	0.143448	0.179604	0.501757	0.0739636	0.849592	0.251349	0.468207	0.147316	0.545051	1.23678	0.35581	0.243367	0.421653	0.171363	1.05005	1.33438	0.130174	0.12013	0.565721	0.519468	1.06492	0.454335	0.750952	0.835968
5.891	0.0890206	0.687943	0.197717	0.451114	0.0697347	0.374078	0.0605615	0.6105	0.0351947	0.149479	0.0101954	0.640724	0.142286	0.753289	0.188023	0.326298	0.810978	0.648972	0.144239	0.419614	0.098163	0.470386	0.278296	0.948574	1.37053	0.251879	0.193675	0.417306	0.126581	0.818395	0.240075	0.501162	0.138395	0.606929	1.00005	0.377733	0.256081	0.421155	0.0936131	1.12196	1.29179	0.130809	0.0608539	0.511238	0.384739	1.15663	0.401992	0.760149	0.85766
6.028	0.0707069	0.718841	0.152464	0.413558	0.0531556	0.386443	0.0313757	0.577817	0.152466	0.389413	0.050195	0.667525	0.0965979	0.686127	0.0664851	0.380637	0.620268	0.684017	0.142178	0.434265	0.18141	0.421063	0.253954	0.820532	1.16143	0.27048	0.133578	0.44819	0.122714	0.651008	0.248139	0.544217	0.0719206	0.247413	0.948498	0.408121	0.171304	0.427661	0.0604186	1.10628	1.11294	0.0951451	0.0760904	0.467947	0.443081	1.32331	0.270254	0.692024	0.827217
6.165	0.0770093	0.746184	0.195084	0.403097	0.0622225	0.512232	0.0887866	0.628577	0.129653	0.342226	0.0639079	0.61147	0.107898	0.68106	0.19031	0.403523	0.479961	0.709065	0.143398	0.38025	0.271331	0.382463	0.194616	0.699324	0.920156	0.342153	0.155251	0.495242	0.0641934	0.666252	0.126229	0.563249	0.130482	0.520791	0.87497	0.431855	0.135964	0.519099	0.130041	1.12614	1.14824	0.172838	0.108391	0.54753	0.380871	1.36398	0.241871	0.678333	0.725483
6.302	0.0421464	0.68075	0.195315	0.443964	0.0688709	0.639531	0.262219	0.521275	0.124492	0.285867	0.0322765	0.59983	0.0657775	0.730434	0.190642	0.523685	0.371048	0.712024	0.0941443	0.341148	0.272297	0.427594	0.160783	0.705232	1.00099	0.426589	0.114113	0.520903	0.0751716	0.621181	0.0961837	0.478478	0.102812	0.51029	0.815457	0.454579	0.173994	0.525086	0.117348	1.22636	1.31364	0.118489	0.141964	0.459646	0.391008	1.36389	0.373911	0.720164	0.58685
6.439	0.063912	0.734964	0.148885	0.510189	0.131408	0.675142	0.169575	0.484836	0.0779507	0.455806	0.0418052	0.448987	0.0755396	0.675851	0.213845	0.451404	0.292797	0.73275	0.166433	0.474366	0.274195	0.469194	0.14107	0.750316	1.24366	0.605241	0.121199	0.476489	0.105945	0.619976	0.1197	0.651966	0.167108	0.431795	0.751844	0.415092	0.0950953	0.500195	0.142143	1.25936	1.21471	0.150289	0.134626	0.38226	0.345094	1.39074	0.34499	0.656801	0.493263
6.576	0.0530797	0.692524	0.234677	0.488009	0.164513	0.795658	0.17832	0.36741	0.0782958	0.418808	0.0156986	0.518146	0.0639025	0.611707	0.124881	0.481252	0.284359	0.77931	0.173726	0.527832	0.268487	0.479748	0.129617	0.72574	1.07276	0.710662	0.152339	0.478515	0.169232	0.631129	0.226938	0.624433	0.127104	0.523218	0.668356	0.444969	0.0440068	0.509468	0.126776	1.29792	1.1435	0.147684	0.140565	0.502973	0.348306	1.2387	0.327967	0.655286	0.537597
6.713	0.0569192	0.746975	0.221316	0.503043	0.197724	0.837632	0.298592	0.387847	0	0.529408	0.0516474	0.509619	0.00875593	0.741867	0.155774	0.398325	0.283461	0.805478	0.180233	0.569047	0.288529	0.510297	0.130505	0.717591	1.13438	0.669636	0.160313	0.528297	0.169919	0.669732	0.139464	0.647484	0.1031	0.557697	0.49133	0.538805	0.0560389	0.542978	0.108797	1.14566	1.03586	0.136801	0.102519	0.506106	0.322842	1.09804	0.390494	0.679156	0.568498
6.85	0.0685389	0.674901	0.257163	0.508466	0.174324	0.860026	0.282028	0.473629	0.0487204	0.424295	0.0238434	0.452146	0.0940659	0.67755	0.104011	0.410224	0.317643	0.870323	0.179078	0.592694	0.294535	0.546941	0.0853181	0.692417	0.876464	0.591838	0.115542	0.591807	0.205909	0.56407	0.1302	0.6616	0.121341	0.534643	0.453597	0.529151	0.0484352	0.538015	0.121824	1.04162	0.816302	0.127593	0.147677	0.539666	0.346609	1.10015	0.340775	0.612424	0.552779
6.987	0.0478593	0.596347	0.206879	0.47676	0.137271	0.846721	0.23926	0.499389	0.0811646	0.41387	0.0604193	0.392413	0.154256	0.739943	0.114849	0.409023	0.273279	0.867651	0.217323	0.640638	0.293477	0.550567	0.0925076	0.674536	0.617598	0.631943	0.11788	0.561497	0.304855	0.691973	0.213852	0.669563	0.0546594	0.627974	0.519007	0.51534	0.114025	0.489642	0.15271	1.2216	0.856818	0.189995	0.151027	0.57316	0.345828	1.064	0.468902	0.677579	0.526926
7.124	0.0357471	0.640128	0.194048	0.473207	0.126392	0.757569	0.156401	0.508797	0.102483	0.435583	0.112589	0.383353	0.0384537	0.665467	0.0658296	0.444979	0.226371	0.844955	0.197858	0.678913	0.342597	0.564567	0.118065	0.658064	0.480072	0.666542	0.0797088	0.522867	0.224336	0.678528	0.0997452	0.455979	0.00809172	0.679922	0.557255	0.601843	0.0788929	0.434872	0.138346	1.24788	0.688383	0.208562	0.257743	0.647719	0.361241	1.02275	0.331404	0.698055	0.386489
7.261	0.0181198	0.69845	0.131208	0.520564	0.13904	0.710885	0.172054	0.576428	0.0601858	0.523766	0.178151	0.318272	0.0098078	0.850717	0.147917	0.535292	0.224706	0.814163	0.180089	0.68342	0.453475	0.576582	0.171208	0.67899	0.400678	0.639906	0.0644342	0.49889	0.141568	0.66119	0.138472	0.630061	0.0336579	0.694438	0.553511	0.636356	0.0871047	0.46771	0.101683	1.09516	0.613822	0.254548	0.386033	0.616419	0.312855	0.916317	0.194469	0.819268	0.421826
7.398	0.0872482	0.728957	0.125326	0.568551	0.07108	0.617023	0.242281	0.575921	0.208979	0.594779	0.0671946	0.318098	0.0372563	0.865492	0.0657746	0.53396	0.252953	0.788743	0.218072	0.687209	0.502063	0.507869	0.194982	0.651649	0.331762	0.635451	0.0233955	0.631754	0	0.793626	0.140307	0.640165	0.0791363	0.728602	0.562559	0.598688	0.127973	0.433321	0.143773	1.22714	0.507061	0.245186	0.360947	0.598041	0.382287	0.881295	0.118429	0.793555	0.353551
7.535	0.0116237	0.738359	0.108505	0.494718	0.0404242	0.559033	0.246586	0.595285	0.233512	0.6248	0.0511609	0.261208	0.0353314	0.716491	0.0937546	0.536251	0.259823	0.775789	0.19112	0.626467	0.422449	0.435143	0.175711	0.6681	0.322581	0.769044	0.073813	0.66509	0.131584	0.74454	0.183213	0.826613	0.123975	0.797685	0.498485	0.630646	0.0948496	0.428373	0.139589	1.38556	0.479063	0.243417	0.368529	0.609732	0.443155	0.862415	0.0921324	0.769873	0.291328
7.672	0.112656	0.735754	0.127941	0.551424	0.115504	0.571304	0.289215	0.572904	0.219868	0.613199	0.0482634	0.252468	0.00548805	0.671897	0.105789	0.448705	0.243471	0.727652	0.139604	0.593322	0.28443	0.431394	0.180474	0.724539	0.239644	0.765678	0.0595261	0.751271	0.0613156	0.766846	0.210683	0.768601	0.166065	0.848683	0.489278	0.596969	0.0428522	0.496067	0.0661278	1.44793	0.47667	0.321223	0.275456	0.654057	0.352361	0.730033	0.0879943	0.928801	0.218771
7.809	0.0183177	0.785066	0.110251	0.497864	0.101071	0.592684	0.217893	0.474851	0.100305	0.735637	0.0219621	0.313039	0.0363334	0.747275	0.0780817	0.628832	0.24463	0.672342	0.0655772	0.572654	0.139025	0.414628	0.181594	0.809415	0.223674	0.724131	0.0619426	0.789287	0.083118	0.658803	0.17815	0.739492	0.101095	0.786695	0.38006	0.599971	0.0778734	0.502331	0.0862064	1.43564	0.45376	0.283471	0.189766	0.602064	0.443563	0.781723	0.121442	0.913142	0.16499
7.946	0.000395665	0.816123	0.121472	0.490282	0.0471459	0.596767	0.376165	0.571527	0.12117	0.571735	0.147839	0.35148	0.0849815	0.773092	0.0401418	0.467264	0.246303	0.668607	0.0887754	0.577741	0.0436449	0.465842	0.152199	0.938909	0.226468	0.767432	0.0774667	0.819555	0.112956	0.758779	0.122598	0.703664	0.120667	0.679332	0.301877	0.568299	0.0823693	0.430976	0.126484	1.35263	0.657903	0.379976	0.176414	0.543336	0.395256	0.893486	0.121559	0.911422	0.188332
8.083	0.0178251	0.789729	0.0808332	0.489062	0.0524855	0.64225	0.244605	0.489055	0.121284	0.696603	0.0867169	0.335247	0.165261	0.644221	0.139694	0.500418	0.233833	0.641973	0.0914496	0.560219	0	0.518493	0.13603	1.09526	0.224216	0.695865	0.0720083	0.796488	0.231199	0.825907	0.132936	0.661587	0.114736	0.62566	0.222275	0.68049	0.0686298	0.470102	0.0938011	1.39297	0.761326	0.324332	0.129535	0.551884	0.353043	0.913237	0.148766	0.971517	0.178614
8.22	0.071789	0.911591	0.0953295	0.466711	0.0412828	0.653762	0.148801	0.388874	0.0575487	0.655216	0.151609	0.338658	0.15779	0.620592	0.120159	0.494298	0.182872	0.656644	0.0928711	0.542441	0.0394959	0.568423	0.109748	1.1509	0.144152	0.649033	0.0684161	0.726791	0.26183	0.696421	0.105899	0.772811	0.0263788	0.643843	0.283188	0.707871	0.067555	0.535116	0.104504	1.28919	0.889005	0.35444	0.106931	0.575433	0.330058	0.918666	0.141815	0.997831	0.154856
8.357	0.0709007	0.722713	0.115169	0.471671	0.0651855	0.647154	0.165076	0.385739	0.121855	0.499151	0.0920975	0.2716	0.0988596	0.638057	0.102519	0.498101	0.154457	0.666226	0.117937	0.515176	0.0538452	0.595819	0.074669	1.1557	0.147841	0.686591	0.0733515	0.754751	0.233734	0.663695	0.0786591	0.713511	0	0.609743	0.418263	0.717514	0.103676	0.51416	0.186087	1.17177	0.804035	0.386075	0.119124	0.607932	0.232229	0.880959	0.0941426	0.800866	0.222286
8.494	0.0486466	0.732038	0.113644	0.485906	0.109096	0.552689	0.205863	0.407422	0.15705	0.534268	0.0592697	0.242662	0.0699019	0.631093	0.0537203	0.543133	0.145512	0.698271	0.126296	0.546676	0.0871532	0.620948	0.0649954	1.21669	0.101116	0.659544	0.0609651	0.727183	0.347281	0.707528	0.0832884	0.706534	0.117947	0.615857	0.364268	0.696366	0	0.409816	0.217464	1.22963	0.682773	0.408006	0.187259	0.682395	0.245943	0.854664	0.206219	0.886504	0.243229
8.631	0.0635163	0.670556	0.111237	0.505836	0.056574	0.580856	0.15976	0.429788	0.0770339	0.635852	0.133906	0.303403	0.0825992	0.676287	0.230802	0.428756	0.154874	0.703423	0.123247	0.554021	0.107878	0.622237	0.0807765	1.29881	0.14164	0.602115	0.067319	0.781417	0.341751	0.568384	0.072425	0.693773	0.0935331	0.490609	0.303528	0.763081	0.0603198	0.549205	0.230188	1.19902	0.491308	0.462026	0.251575	0.672763	0.236805	0.920808	0.303323	0.831971	0.215559
8.768	0.13363	0.722635	0.0852988	0.49899	0.0445022	0.58275	0.103584	0.465544	0.0835701	0.755937	0.0698651	0.374802	0.0993502	0.701262	0.0832912	0.406849	0.189645	0.658606	0.0603719	0.544267	0.12035	0.532579	0.143391	1.22534	0.114341	0.687869	0.103617	0.862088	0.413453	0.479052	0.110049	0.729664	0.120505	0.692279	0.293495	0.845046	0.0655895	0.598559	0.149733	1.29491	0.361811	0.520486	0.285673	0.701422	0.294607	0.928157	0.218761	0.873775	0.222365
8.905	0.0216647	0.576038	0.0723499	0.573927	0.0870571	0.464308	0.0485766	0.418235	0.149829	0.416141	0.0601058	0.353447	0.129501	0.622238	0.0458196	0.402449	0.175361	0.644016	0.039755	0.579987	0.141221	0.515662	0.242771	1.12761	0.148619	0.762898	0.0818484	0.851761	0.591934	0.505853	0.0276262	0.721005	0.114719	0.57544	0.276886	0.919542	0.0907653	0.548013	0.0721085	1.25999	0.205248	0.4712	0.195838	0.534877	0.297195	0.949194	0.188081	0.940888	0.199365
9.042	0.0358481	0.836672	0.0895699	0.534639	0.0566578	0.432765	0.0404042	0.415219	0.152007	0.53019	0.117105	0.401274	0.186078	0.612778	0.106909	0.333572	0.130487	0.606183	0.0403548	0.594022	0.138747	0.546756	0.24622	1.18281	0.108569	0.736178	0.0516923	0.842535	0.724146	0.457632	0.0212824	0.698893	0.0912796	0.515916	0.256961	0.899215	0.0622913	0.602151	0.0208151	1.14529	0.232889	0.543159	0.14153	0.604675	0.239124	0.972052	0.105084	0.969738	0.15207
9.179	0.0195975	0.71331	0.0720016	0.562425	0.0686877	0.478395	0.0677832	0.509723	0.217463	0.347322	0.120824	0.494071	0.162355	0.593573	0.201153	0.450336	0.133285	0.559995	0	0.587006	0.126624	0.592295	0.138453	1.07044	0.0855943	0.850835	0.0450172	0.71565	0.734129	0.426167	0.0368215	0.632701	0.118206	0.629623	0.26231	0.898823	0.102625	0.677092	0.143622	1.39369	0.231918	0.586873	0.136189	0.678388	0.262132	1.043	0.0963165	0.956188	0.117028
9.316	0.0685389	0.854373	0.15592	0.646281	0.0713994	0.452325	0.0620894	0.617756	0.286013	0.51663	0.147789	0.504373	0.103516	0.654654	0.258685	0.376175	0.153868	0.613985	0.0161182	0.598394	0.122394	0.661639	0.109234	0.99827	0.0719171	0.941309	0.0413053	0.833556	0.716756	0.466067	0.115071	0.641754	0.191389	0.548927	0.358636	0.894794	0.0719464	0.626631	0.141214	1.43205	0.197895	0.426009	0.0692279	0.710727	0.22133	1.16181	0.0976618	1.05174	0.0945741
9.453	0.0746434	0.793837	0.0972071	0.647018	0.0197619	0.364662	0.0786085	0.564413	0.280626	0.448829	0.197821	0.432495	0.121519	0.665771	0.120607	0.365148	0.170395	0.652781	0.0271438	0.581041	0.119105	0.729735	0.0767645	0.900794	0.123898	0.898733	0.0796986	0.77042	0.669427	0.443239	0.0760846	0.69331	0.138349	0.404392	0.437426	1.03564	0.0894448	0.673524	0.187937	1.48598	0.294541	0.439262	0.133881	0.732922	0.194878	1.1424	0.0623525	1.09719	0.0840404
9.59	0	0.852636	0.0643191	0.550817	0	0.350377	0.115419	0.511188	0.163241	0.409168	0.191388	0.507974	0.128982	0.708906	0.153949	0.412442	0.205385	0.635318	0.0612648	0.530624	0.125728	0.796469	0.0528032	0.823972	0.130859	0.847825	0.107684	0.764198	0.570001	0.421225	0.0652038	0.737328	0.173315	0.438717	0.348666	0.77417	0.081927	0.631007	0.244119	1.30942	0.222538	0.527385	0.186938	0.712473	0.168543	1.07921	0.0715954	1.01103	0.0902131
9.727	0.10064	0.883298	0.0861132	0.497834	0.0409058	0.38195	0.150702	0.584854	0.209896	0.597681	0.191803	0.535894	0.117556	0.858445	0.162293	0.40409	0.201246	0.617063	0.0865906	0.493917	0.135944	0.864422	0.0732555	0.760941	0.164877	0.858136	0.135321	0.776695	0.531814	0.432132	0.0976845	0.776666	0.142642	0.434075	0.291483	0.8329	0.0861834	0.729901	0.170861	1.47965	0.190408	0.439806	0.0828866	0.788953	0.228279	1.05691	0.135048	1.00618	0.0917876
9.864	0.11423	0.875791	0.100904	0.397874	0.0808746	0.436973	0.0914245	0.601466	0.197514	0.57495	0.124017	0.514362	0.165502	0.677869	0.0408826	0.405247	0.228536	0.648644	0.108187	0.493847	0.144586	0.887915	0.0850666	0.701519	0.194761	0.860407	0.160043	0.811167	0.682205	0.462229	0.102279	0.752587	0.11397	0.444129	0.23887	0.786741	0.0883945	0.574648	0.0982671	1.27467	0.283619	0.403166	0.116045	0.683706	0.359633	1.02544	0.167237	0.956546	0.190968
10.001	0.108029	0.915226	0.105098	0.534896	0.0784194	0.481569	0	0.546198	0.212075	0.495467	0.0631871	0.581786	0.122691	0.746535	0.0633472	0.363437	0.251198	0.682944	0.104765	0.474031	0.146316	0.878792	0.0977731	0.642947	0.213181	0.960365	0.176907	0.867198	0.810094	0.496752	0.0971015	0.768952	0.160417	0.440141	0.286193	0.705072	0.0832107	0.670686	0.085825	1.22508	0.426952	0.470012	0.184747	0.72873	0.31623	0.948979	0.167718	0.941607	0.168439
10.138	0.114723	0.795895	0.179393	0.640352	0.0307605	0.458135	0.0983327	0.56203	0.216314	0.530739	0.0354948	0.657296	0.182951	0.782687	0.0990988	0.414908	0.241657	0.723091	0.132502	0.503734	0.16146	0.860984	0.120847	0.661555	0.18259	0.947281	0.16314	0.984514	0.904114	0.487207	0.0672819	0.775566	0.200714	0.526001	0.312151	0.708396	0.0695142	0.790885	0.0693662	1.32669	0.636749	0.535086	0.212718	0.744409	0.306738	0.923676	0.255113	0.982712	0.15596
10.275	0.186806	0.847737	0.149156	0.621148	0.0365085	0.442131	0.104624	0.692287	0.197169	0.558253	0.0688921	0.692142	0.292733	0.859557	0.0673519	0.463727	0.22012	0.688915	0.141721	0.485636	0.204568	0.849315	0.141943	0.705985	0.150705	0.865662	0.149858	0.956923	0.780002	0.450304	0.0463342	0.750357	0.199746	0.608537	0.241665	0.679875	0.0300217	0.79347	0.0171796	1.37539	0.724861	0.505199	0.352083	0.667264	0.273029	0.925304	0.107437	0.894288	0.165811
10.412	0.214378	0.882666	0.167358	0.57474	0.0300538	0.508273	0.0513986	0.661098	0.187542	0.416455	0.0837509	0.695926	0.228269	0.847534	0.181605	0.524368	0.209055	0.662238	0.144165	0.424348	0.232928	0.811277	0.162025	0.711376	0.118933	0.936436	0.106105	0.831869	0.758608	0.463165	0.0477773	0.800245	0.170427	0.557231	0.216852	0.624121	0.0135491	0.729911	0.0435472	1.38973	0.653224	0.456876	0.259898	0.781044	0.250137	0.91879	0.177201	0.962565	0.185741
10.549	0.20059	0.784357	0.169616	0.525494	0.0437798	0.590288	0.105545	0.63304	0.221357	0.430018	0.0940689	0.606757	0.20339	0.856746	0.179671	0.537471	0.167481	0.630961	0.142768	0.463199	0.327165	0.716159	0.163439	0.709038	0.177246	0.984454	0.144967	0.829741	0.761024	0.410562	0	0.854984	0.142591	0.571094	0.265936	0.562758	0.0751341	0.845305	0.127763	1.4167	0.507101	0.531235	0.15694	0.796195	0.365225	0.972548	0.160592	1.03258	0.189756
10.686	0.343574	0.882825	0.205368	0.587035	0.094229	0.61441	0.100065	0.597044	0.310428	0.465445	0.112449	0.57951	0.259655	0.879413	0.0561002	0.444647	0.128684	0.621853	0.192703	0.468228	0.398056	0.613146	0.131919	0.718052	0.169312	0.967825	0.0800882	0.708244	0.49869	0.49032	0.0410237	0.814841	0.177609	0.578734	0.211343	0.579039	0.0351072	0.798803	0.208924	1.24358	0.383361	0.624443	0.0944824	0.708571	0.366083	0.962498	0.183339	1.03671	0.262063
10.823	0.363467	0.862911	0.205449	0.548327	0.0990189	0.605445	0.106416	0.577168	0.244746	0.565385	0.103698	0.433696	0.196509	0.868498	0.107536	0.469917	0.128546	0.65515	0.239581	0.416477	0.362051	0.538283	0.104159	0.742617	0.213648	0.809015	0.0648205	0.704676	0.601005	0.460683	0.0951678	0.883532	0.172266	0.535037	0.234784	0.577497	0.0425266	0.754262	0.215923	1.43013	0.409439	0.647942	0.0469859	0.760545	0.259272	0.903597	0.146352	1.0748	0.405466
10.96	0.265091	0.694974	0.171883	0.47747	0.107023	0.620438	0.09458	0.594644	0.228465	0.524079	0.1483	0.388326	0.187471	0.851187	0.167864	0.567263	0.149927	0.697559	0.195807	0.439877	0.312142	0.473042	0.126386	0.724598	0.197657	0.881373	0.0342303	0.658671	0.47565	0.487243	0.0937709	0.920807	0.119289	0.606561	0.364637	0.608055	0.0729537	0.670436	0.190867	1.49176	0.43844	0.655538	0.0613645	0.790445	0.268493	0.998369	0.125912	1.1355	0.571585
11.097	0.371638	0.746738	0.191392	0.468571	0.1748	0.671315	0.0718197	0.613221	0.288305	0.35618	0.112679	0.460594	0.206488	0.863094	0.109176	0.550573	0.173588	0.810211	0.144238	0.464784	0.301765	0.419073	0.157191	0.69947	0.204767	0.818962	0.0170348	0.848456	0.540134	0.502031	0.0887259	0.91911	0.0860292	0.620304	0.357213	0.692806	0.0279396	0.659303	0.161621	1.26093	0.329932	0.747565	0.130766	0.692788	0.273618	1.07443	0.0918766	1.14836	0.453998
11.234	0.297391	0.722872	0.13466	0.449327	0.222569	0.660032	0.0470735	0.625508	0.224684	0.340187	0.131275	0.414767	0.144593	1.01028	0.106204	0.424616	0.16851	0.886415	0.135263	0.451926	0.314369	0.512507	0.137512	0.679228	0.195696	0.769903	0.0471499	0.891289	0.421476	0.545832	0.113749	0.881995	0.178087	0.617386	0.274779	0.617073	0.0271596	0.692302	0.303242	1.30058	0.239008	0.771805	0.136735	0.83692	0.272811	0.963732	0.220996	1.18969	0.285721
11.371	0.381881	0.78388	0.152627	0.458653	0.172476	0.638955	0.0321322	0.667977	0.175047	0.349203	0.165992	0.37621	0.174291	0.887121	0.159648	0.450688	0.200661	0.906597	0.135153	0.467999	0.302129	0.48252	0.0943364	0.681981	0.117689	0.731526	0.0699336	0.936719	0.41877	0.557047	0.210158	0.880297	0.181902	0.685113	0.305712	0.664997	0.0573532	0.715672	0.375659	1.30795	0.251748	0.752516	0.130929	0.754006	0.362849	1.17511	0.260899	1.26436	0.206988
11.508	0.338653	0.65396	0.132602	0.443974	0.12668	0.60399	0.0475115	0.621281	0.248527	0.382831	0.184292	0.363179	0.185496	0.880352	0.252502	0.528824	0.230145	0.879565	0.118954	0.503221	0.307204	0.406464	0.0550397	0.669588	0.102471	0.700246	0.0785707	0.926065	0.329446	0.602782	0.263419	0.796249	0.160428	0.603654	0.293572	0.73448	0.0811777	0.653733	0.475566	1.35615	0.157321	0.731435	0.189138	0.70992	0.503423	1.1648	0.209927	1.30179	0.19877
11.645	0.369967	0.606226	0.196391	0.497234	0.124775	0.600474	0.0976409	0.607369	0.350897	0.292373	0.111991	0.259537	0.180889	0.927569	0.120595	0.801221	0.20591	0.96472	0.131719	0.47807	0.396315	0.398421	0.0819614	0.679036	0.0972842	0.681882	0.16827	0.981377	0.239933	0.565124	0.238511	0.793048	0.165096	0.556844	0.25827	0.642689	0.101772	0.685943	0.446143	1.4358	0.0916059	0.701404	0.226341	0.692473	0.539078	1.25361	0.118818	1.21265	0.228763
11.782	0.301133	0.449986	0.103062	0.45351	0.131858	0.533029	0.144361	0.64365	0.429533	0.2843	0.24091	0.331529	0.183795	0.76851	0.13995	0.584032	0.190546	1.01378	0.119389	0.452714	0.445976	0.385278	0.136331	0.710948	0.113837	0.676751	0.158758	0.862	0.206857	0.560225	0.176753	0.68696	0.187464	0.550568	0.292605	0.585378	0.103909	0.718407	0.380135	1.32979	0.101802	0.633776	0.258979	0.671843	0.409624	1.24771	0.19941	1.32875	0.28014
11.919	0.204236	0.494402	0.162463	0.4514	0.15341	0.465766	0.184193	0.747871	0.563652	0.191651	0.306374	0.296683	0.0777847	0.919372	0.11528	0.631097	0.157348	1.04972	0.133598	0.485044	0.431961	0.339064	0.144278	0.653969	0.124592	0.779089	0.0787347	0.972482	0.144659	0.565908	0.220935	0.617527	0.232833	0.631369	0.298174	0.713678	0.0862571	0.709662	0.367986	1.31228	0.222765	0.624366	0.256058	0.698178	0.294383	1.23508	0.0714676	1.14511	0.349632
12.056	0.251502	0.566317	0.114255	0.4283	0.144165	0.542297	0.308675	0.697025	0.455327	0.231235	0.363327	0.415869	0.117552	0.853649	0.147426	0.654056	0.17035	1.10042	0.17788	0.528122	0.429876	0.372717	0.137199	0.635018	0.175967	0.810569	0.105066	0.930532			0.130691	0.586438	0.434002	0.554542	0.293194	0.769666	0.0708163	0.718937	0.287003	1.33686	0.238798	0.642457	0.221516	0.635647	0.240665	1.2185	0.0502554	1.10717	0.465823
12.193	0.318761	0.490766	0.178493	0.483553	0.140176	0.600564	0.305624	0.718777	0.389754	0.228882	0.347441	0.447167	0.208849	0.924998	0.160053	0.575243	0.174124	1.13196	0.182173	0.500646	0.46536	0.34917	0.142785	0.671944	0.220373	0.785978	0.119093	0.921009			0.197603	0.601027	0.423939	0.615076	0.360451	0.657405	0.0296286	0.694293	0.283435	1.31821	0.289118	0.593315	0.165753	0.581558	0.260793	1.13565	0.107391	1.06067	0.46556
12.33	0.42964	0.438924	0.224655	0.511945	0.196174	0.563292	0.199204	0.712951	0.381961	0.147521	0.309463	0.368089	0.332126	0.83562	0.114028	0.653485	0.192223	1.25553	0.212641	0.522214	0.501005	0.29479	0.162361	0.686404	0.188828	0.818121	0.0746914	0.858634			0.235319	0.592191	0.691144	0.502462	0.303304	0.630839	0.0563214	0.690538	0.244359	1.32567	0.352725	0.528402	0.159248	0.607105	0.236451	0.993828	0.151278	1.00784	0.417769
12.467	0.487839	0.45702	0.204662	0.466621	0.26137	0.553168	0.14355	0.729627	0.515621	0.152614	0.355402	0.392017	0.381016	0.842145	0.181429	0.549204	0.169646	1.35544	0.181795	0.514141	0.511565	0.285068	0.122736	0.695808	0.124688	0.888906	0.0746162	1.01798			0.216559	0.61028	1.05623	0.432907	0.198702	0.699524	0.0802933	0.75488	0.263691	1.26307	0.340012	0.572515	0.174239	0.602792	0.294729	0.959403	0.206034	0.987972	0.396756
12.604	0.522108	0.397275	0.139909	0.597157	0.256889	0.50184	0.193614	0.705118	0.685739	0.279049	0.676228	0.412005	0.523268	0.783961	0.155708	0.574076	0.173681	1.3215	0.134962	0.546178	0.479527	0.281357	0.0770312	0.715499	0.0479312	0.937906	0.0800301	1.04929			0.19321	0.487229	1.09574	0.491281	0.190598	0.668846	0.0320485	0.769757	0.317669	1.21469	0.366548	0.573643	0.185314	0.55847	0.291532	0.909893	0.142598	1.07215	0.390209
12.741	0.436729	0.424382	0.131434	0.498024	0.264296	0.448206	0.123895	0.637953	0.707634	0.150497	0.781317	0.388905	0.545038	0.802881	0.218313	0.536678	0.162556	1.28653	0.105298	0.577131	0.407922	0.272462	0.0492332	0.744464	0.12275	1.02263	0.107965	1.02726			0.178225	0.390438	1.03904	0.432144	0.123596	0.673789	0.0401927	0.808743	0.217005	1.29391	0.297696	0.652393	0.205222	0.557904	0.270393	0.935523	0.157948	0.935039	0.378101
12.878	0.657902	0.392771	0.192989	0.444798	0.288937	0.431404	0.0535786	0.543473	0.672898	0.245421	0.909342	0.375807	0.496631	0.838048	0.138001	0.579069	0.165898	1.13137	0.0875268	0.508036	0.350814	0.272328	0.02174	0.786597	0.120504	1.06655	0.134546	1.05597			0.204605	0.559962	1.01869	0.400196	0.0935341	0.700711	0.0365383	0.742679	0.147173	1.11358	0.328929	0.822958	0.226428	0.589719	0.26753	0.89208	0.216326	0.995921	0.319076
13.015	1.04401	0.408894	0.293227	0.470614	0.349343	0.472561	0.0834562	0.562513	0.761166	0.208972	1.01953	0.397795	0.465428	0.870547	0.156646	0.628726	0.157661	1.03009	0.0949333	0.537595	0.333049	0.259421	0	0.817262	0.0832283	0.998185	0.121725	1.20569			0.21421	0.441298	0.884712	0.339133	0.04684	0.606888	0.0536312	0.775594	0.177109	0.968304	0.286047	0.765984	0.26817	0.621848	0.333326	0.832919	0.263507	1.04679	0.344842
13.152	1.08311	0.461132	0.345082	0.486595	0.41656	0.487496	0.123701	0.583555	0.599532	0.332428	1.13844	0.470293	0.357933	0.790373	0.109268	0.575989	0.13397	0.920846	0.142359	0.543929	0.306329	0.280774	0.0108815	0.832984	0.0754428	0.914232	0.125338	1.06451			0.176211	0.426081	0.899569	0.359411	0.00699568	0.697736	0.035402	0.744496	0.219433	0.961517	0.201522	0.888065	0.277734	0.572253	0.36687	0.87736	0.263881	0.952309	0.350048
13.289	1.29443	0.411895	0.243947	0.542361	0.444886	0.474012	0.119475	0.546381	0.657884	0.277637	1.0112	0.456257	0.370992	0.75887	0.169038	0.572312	0.131653	0.847723	0.138839	0.504039	0.281374	0.325175	0.0233669	0.870021	0.110635	0.945957	0.139963	0.9554			0.140907	0.447011	0.991316	0.310648	0.103686	0.752065	0.0446702	0.765231	0.375873	1.13829	0.215475	0.94759	0.213091	0.613602	0.350557	0.938654	0.205656	0.975062	0.277499
13.426	1.56198	0.46769	0.209014	0.545904	0.547214	0.401253	0.150005	0.595346	0.441111	0.198392	0.80706	0.427326	0.530948	0.803012	0.153111	0.551597	0.147948	0.833059	0.094789	0.468358	0.297636	0.323988	0.0438916	0.870792	0.120545	0.839924	0.0909264	1.0214			0.186965	0.506471	0.974395	0.261044	0.0340526	0.71188	0.0402726	0.782327	0.480852	1.03129	0.182405	0.967252	0.222093	0.635707	0.424222	0.871835	0.211201	1.03877	0.266358
13.563	1.40738	0.493138	0.266126	0.505446	0.570876	0.342816	0.176493	0.520645	0.575802	0.337366	0.877808	0.351483	0.610653	0.6815	0.235471	0.373416	0.184217	0.80733	0.114369	0.503553	0.321882	0.335702	0.0369992	0.901147	0.155725	0.710713	0.118	1.10919			0.118009	0.467344	0.820047	0.274024	0.0974697	0.829522	0.0808215	0.827426	0.528145	1.03883	0.26771	0.965771	0.170129	0.591554	0.449895	0.87687	0.156444	0.97367	0.225002
13.7	0.916489	0.48484	0.203653	0.461692	0.451728	0.278684	0.213642	0.459709	0.753831	0.329607	0.816852	0.320758	0.696716	0.654357	0.292285	0.455488	0.189835	0.79529	0.0435949	0.467347	0.344383	0.369734	0.0651516	0.936366	0.143147	0.769478	0.132457	1.00487			0.102995	0.563072	0.674367	0.27861	0.113586	0.814441	0.116764	0.855494	0.534224	1.13232	0.166938	1.01632	0.129786	0.61406	0.489228	0.886416	0.146045	0.895927	0.240929
13.837	0.707138	0.468163	0.0904612	0.396674	0.389344	0.293394	0.264782	0.597182	0.592655	0.279912	0.757607	0.250228	0.829106	0.602766	0.437192	0.513129	0.199938	0.81466	0.120383	0.542933	0.438786	0.351088	0.137142	1.00187	0.175652	0.798305	0.125218	0.847032			0.245022	0.550666	0.470357	0.29482	0.0898538	0.830327	0.0777813	0.813664	0.635156	1.01845	0.135856	0.897035	0.182832	0.665814	0.554137	0.729222	0.152715	0.957621	0.247431
13.974	0.547415	0.592711	0.0275175	0.42646	0.404614	0.300383	0.234113	0.627067	0.482265	0.251694	1.0247	0.158425	1.08717	0.651688	0.440692	0.46571	0.234198	0.818864	0.145995	0.556747	0.387684	0.338514	0.179948	1.03917	0.205603	0.861957	0.19089	0.894895			0.228467	0.54487	0.376928	0.316928	0.117426	0.731512	0.104585	0.841022	0.693725	1.09617	0.182913	0.775756	0.226224	0.635933	0.512861	0.857693	0.196541	1.11308	0.195846
14.111	0.906941	0.582359	0.049375	0.397167	0.351793	0.279902	0.286761	0.524649	0.484557	0.283828	1.19291	0.176539	1.22485	0.651219	0.338414	0.489501	0.274967	0.896566	0.132273	0.556213	0.466858	0.335186	0.241777	1.10245	0.220647	0.874884	0.125232	0.872723			0.202786	0.54178	0.453234	0.31825	0.152081	0.727899	0.140803	0.838894	0.858392	1.17256	0.380888	0.898401	0.274027	0.623699	0.541893	0.754902	0.120639	1.10866	0.190539
14.248	1.29266	0.388899	0.0710922	0.456939	0.34069	0.285868	0.380988	0.518562	0.344819	0.236408	1.61598	0.124621	1.58769	0.686307	0.279226	0.462891	0.31325	0.996433	0.129991	0.513803	0.508595	0.353792	0.216391	1.04658	0.246349	0.88162	0.137229	0.909174			0.220305	0.620184	0.352704	0.341582	0.119086	0.749768	0.138064	0.708934	0.894281	1.04223	0.38755	0.930423	0.304913	0.631452	0.496536	0.707211	0.158756	1.27208	0.170401
14.385	1.05977	0.444455	0.0592744	0.442461	0.398944	0.278497	0.448627	0.499056	0.248413	0.197138	1.84887	0.0657905	1.33448	0.555485	0.32687	0.363361	0.355424	1.00502	0.171196	0.502237	0.437815	0.349753	0.210672	1.02351	0.239469	0.835095	0.212108	0.964242			0.177677	0.733427	0.297947	0.289818	0.137154	0.800802	0.124018	0.699481	0.971315	1.11811	0.370871	0.947352	0.257667	0.604898	0.382128	0.664939	0.110557	1.34856	0.192913
14.522	1.17567	0.452043	0	0.48057	0.395055	0.27306	0.380565	0.498979	0.315929	0.300994	1.78985	0.0643027	1.43862	0.542902	0.331818	0.306539	0.376603	0.953877	0.242658	0.519321	0.308985	0.356335	0.152908	0.961773	0.253027	0.88693	0.162726	0.905557			0.124549	0.579266	0.380057	0.361627	0.15416	1.01193	0.159917	0.680344	0.879081	1.10349	0.302522	0.876843	0.350714	0.623588	0.378475	0.581505	0.115109	1.44541	0.276458
14.659	0.849529	0.361633	0.174932	0.346874	0.461502	0.264309	0.241315	0.500124	0.244287	0.262587	1.62282	0.0492281	1.26038	0.574063	0.313704	0.187646	0.345078	0.891175	0.33039	0.528777	0.213575	0.319446	0.108936	0.887592	0.187992	0.795644	0.153231	0.870526			0.166692	0.539912	0.591963	0.338475	0.151524	0.965906	0.149789	0.68112	0.742438	1.17012	0.257381	0.875379	0.372155	0.608138	0.407498	0.531799	0.128884	1.52144	0.279711
14.796	0.626487	0.344487	0.330052	0.426393	0.697284	0.310161	0.376324	0.493635	0.236603	0.143443	1.42971	0.0557985	1.32656	0.593603	0.110364	0	0.260486	0.851547	0.324979	0.57526	0.217496	0.302122	0.120176	0.823734	0.187777	0.854533	0.230284	0.881568			0.151933	0.563472	0.47895	0.283613	0.191113	0.88449	0.20315	0.684382	0.563376	1.10622	0.211607	0.845322	0.537075	0.63316	0.379455	0.615769	0.108444	1.46293	0.256686
14.933	0.368881	0.318484	0.465852	0.413852	0.836727	0.308103	0.481605	0.453972	0.225827	0.173073	1.26778	0.0032852	1.34148	0.634148	0.258737	0.138775	0.2022	0.790846	0.305084	0.593817	0.264586	0.360146	0.12335	0.770755	0.18773	0.835568	0.248321	0.868386			0.134725	0.544007	0.406424	0.339407	0.18622	0.996019	0.14041	0.725074	0.349156	1.00374	0.127202	0.739387	0.636674	0.537433	0.406155	0.440003	0.113984	1.40072	0.288979
15.07	0.312555	0.274545	0.479086	0.409319	0.919915	0.281761	0.443988	0.423376	0.220326	0.150106	1.28227	0.0248404	1.23735	0.613582	0.431508	0.139109	0.215153	0.781565	0.330352	0.561351	0.350328	0.418622	0.117505	0.719269	0.278825	0.810049	0.318982	0.890783			0.175178	0.557985	0.40556	0.411705	0.193238	0.984561	0.159063	0.751878	0.530061	1.00692	0.175017	0.803696	0.666948	0.554998	0.423506	0.457062	0.192853	1.30291	0.337819
15.207	0.326835	0.312872	0.490257	0.42423	0.890113	0.26161	0.436512	0.427705	0.281769	0.155984	1.41176	0.0155739	1.25655	0.475563	0.344795	0.0854237	0.238684	0.837332	0.334303	0.504314	0.501112	0.463299	0.103854	0.705573	0.163694	0.894078	0.364454	0.953946			0.0956815	0.585033	0.426556	0.377533	0.229165	0.812689	0.228	0.718296	0.593583	0.913733	0.210239	0.790604	0.780736	0.557147	0.551957	0.448128	0.23053	1.23484	0.330968
15.344	0.22452	0.233054	0.454903	0.385796	0.626392	0.265406	0.438931	0.407414	0.242912	0.147208	1.46037	0.00309881	1.19732	0.612068	0.33944	0.0429008	0.292428	0.89669	0.371319	0.475239	0.758179	0.487727	0.104029	0.684662	0.178569	0.903049	0.353336	0.967513			0.1456	0.609233	0.403203	0.269344	0.28338	0.772398	0.213978	0.655656	0.809396	1.13722	0.343572	0.695261	0.771096	0.648072	0.595716	0.514896	0.294423	1.21082	0.298704
15.481	0.268636	0.261506	0.466409	0.367005	0.49778	0.219049	0.359213	0.317032	0.247723	0.155435	1.35721	0.0799631	1.21666	0.484937	0.337017	0.0912621	0.360058	0.920464	0.447684	0.498506	0.9519	0.505129	0.113177	0.607851	0.157541	0.995878	0.399754	0.93258			0.204997	0.681683	0.432884	0.287218	0.426075	0.655184	0.24072	0.623184	0.892934	1.21845	0.337476	0.643967	0.958299	0.454215	0.638048	0.467443	0.407798	1.12834	0.312882
15.618	0.268241	0.241829	0.413943	0.395048	0.479767	0.156076	0.414653	0.298788	0.281887	0.159827	1.3816	0.0115598	1.28949	0.601886	0.340055	0.166962	0.406571	0.924881	0.43992	0.477756	0.938289	0.468646	0.111074	0.572735	0.124627	1.10017	0.32591	0.991989			0.157537	0.649513	0.466634	0.230211	0.487476	0.518322	0.27213	0.679434	0.973823	1.34768	0.215497	0.619673	0.905962	0.50629	0.691735	0.403909	0.396596	1.0233	0.349594
15.755	0.203251	0.243092	0.413636	0.453173	0.416	0.208431	0.352703	0.37234	0.346081	0.228413	1.48092	0.107579	1.64648	0.551723	0.315445	0.0908477	0.359529	0.894649	0.414058	0.426525	0.878008	0.430795	0.130737	0.617334	0.104927	1.03733	0.304197	0.977314			0.119942	0.549169	0.336613	0.157283	0.393121	0.585724	0.28496	0.768111	0.853821	1.1595	0.230242	0.541192	1.02761	0.489336	0.752683	0.471446	0.324059	1.07719	0.2998
15.892	0.320533	0.326073	0.301684	0.473864	0.44731	0.233591	0.259556	0.358644	0.319601	0.153868	1.48039	0.00423381	1.52465	0.493449	0.528424	0.19815	0.249477	0.80373	0.470214	0.431853	0.778605	0.417754	0.174656	0.631335	0.105469	0.97961	0.281519	0.964375			0.194659	0.454472	0.353747	0.147082	0.335847	0.642868	0.403536	0.818734	0.941072	1.10445	0.231615	0.543844	1.29817	0.447934	0.859139	0.520548	0.332959	1.15928	0.309463
16.029	0.417527	0.213772	0.355049	0.444471	0.369351	0.294292	0.301827	0.288563	0.325674	0.195568	1.41946	0	1.58133	0.599815	0.536527	0.141639	0.304317	0.78778	0.410008	0.340508	0.715379	0.382893	0.179662	0.585184	0.10382	1.16902	0.26727	0.934762			0.160233	0.611177	0.442716	0.202233	0.343554	0.586532	0.465742	0.711307	0.908807	1.12365	0.241592	0.528822	1.46343	0.507041	1.01518	0.489011	0.309507	1.12011	0.428024
16.166	0.607681	0.153159	0.424594	0.511502	0.282812	0.218314	0.460865	0.300278	0.358458	0.265644	1.39133	0.0484093	1.40904	0.573499	0.605058	0.150753	0.427244	0.770319	0.323469	0.300734	0.657669	0.325475	0.152954	0.594406	0.140475	1.24177	0.394706	0.921359			0.111088	0.528193	0.581439	0.223879	0.325053	0.570699	0.471632	0.625964	0.862257	1.21073	0.158377	0.599246	1.49806	0.634429	1.0934	0.514163	0.29588	1.06884	0.547356
16.303	1.14219	0.139327	0.36812	0.588329	0.436746	0.251972	0.520869	0.288421	0.378062	0.222299	1.51183	0.0643826	1.61785	0.694752	0.440845	0.111546	0.574675	0.718458	0.278674	0.274454	0.675686	0.333454	0.0924238	0.593389	0.167124	1.28438	0.46453	0.979994			0.181954	0.559391	0.685381	0.192787	0.367884	0.577789	0.451382	0.62737	0.891194	1.21434	0.145864	0.532554	1.44761	0.525012	1.16752	0.447169	0.358018	1.11409	0.676301
16.44	1.22067	0.123521	0.395054	0.565428	0.412461	0.11838	0.560283	0.382913	0.594947	0.229667	1.72696	0.112695	1.421	0.647768	0.566031	0.104298	0.719185	0.635509	0.306579	0.259069	0.631222	0.366895	0.133081	0.57254	0.173974	1.3243	0.465344	0.891023			0.143188	0.607522	0.64362	0.170226	0.462577	0.505982	0.443066	0.603504	0.842784	1.22478	0.119457	0.597998	1.24392	0.591694	1.05656	0.373844	0.325348	1.1561	0.629264
16.577	1.16829	0.140357	0.351018	0.610659	0.362698	0.143241	0.590395	0.305902	0.553335	0.170565	2.03265	0.0952641	1.19029	0.600559	0.463959	0.143307	0.847582	0.621344	0.312367	0.21975	0.501688	0.385272	0.159069	0.565682	0.126745	1.14756	0.419609	0.824852			0.127458	0.600246	0.684476	0.190121	0.425906	0.494661	0.528758	0.586334	0.622222	1.16778	0.264965	0.534008	0.848095	0.534838	0.91781	0.379791	0.538835	0.905213	0.543499
16.714	1.20334	0.0644888	0.451356	0.558093	0.241284	0.124751	0.621541	0.333042	0.555627	0.136702	2.04049	0.168024	1.00145	0.613811	0.384797	0.160553	0.919648	0.608872	0.256028	0.142398	0.477579	0.357697	0.190227	0.5972	0.121302	1.02814	0.503604	0.89338			0.191825	0.644703	0.525915	0.121748	0.420831	0.489688	0.518292	0.54805	0.410217	1.08823	0.369623	0.552481	0.640309	0.501625	0.828304	0.369724	0.644911	0.885941	0.488856
16.851	1.10487	0.142884	0.356587	0.456769	0.332916	0.190131	0.516216	0.274047	0.581308	0.0450706	1.95306	0.223334	0.819357	0.647509	0.514428	0.146072	0.938753	0.57134	0.313402	0.167111	0.480443	0.35145	0.261067	0.62179	0.106503	1.00894	0.440571	0.856803			0.200922	0.812346	0.491439	0.0849437	0.331556	0.42297	0.589041	0.522689	0.142149	1.1118	0.417705	0.601287	0.626099	0.560315	0.801544	0.331766	0.657755	0.762999	0.505217
16.988			0.334852	0.508996	0.347836	0.206809	0.429231	0.211564	0.736061	0.181695	1.8201	0.244053	0.923052	0.617498	0.451437	0.135038	0.926924	0.58662	0.346006	0.163416	0.415001	0.376743	0.241708	0.638391	0.168627	1.16797	0.478099	0.940843			0.142379	0.705966	0.449206	0.0554448	0.302501	0.448569	0.685045	0.537717	0.173222	1.21194	0.398089	0.547372	0.604347	0.653386	0.976779	0.290299	0.571469	0.745124	0.601582
17.125			0.61928	0.386539	0.350579	0.187875	0.375045	0.275375	0.829948	0.123691	1.7318	0.277398	0.764372	0.536449	0.432561	0.187812	0.945127	0.601699	0.336987	0.200951	0.310361	0.337287	0.177323	0.678941	0.153179	1.04139	0.56676	0.939495			0.166531	0.660451	0.369677	0.122871	0.380425	0.365882	0.717665	0.638252	0.224448	1.23369	0.511557	0.600713	0.590484	0.69961	1.10853	0.251094	0.697658	0.82918	0.526609
17.262			0.655172	0.490765	0.24253	0.183492	0.364145	0.241933	0.789938	0.104331	1.70806	0.325118	0.697119	0.465923	0.361654	0.16602	0.951513	0.620984	0.328814	0.268693	0.365133	0.297465	0.148511	0.737777	0.129653	0.912726	0.721867	1.04189			0.143534	0.587436	0.254808	0.0576007	0.405945	0.475644	0.738486	0.692645	0.248444	1.26692	0.474932	0.686513	0.534435	0.712655	1.36207	0.356564	0.654118	0.819834	0.392699
17.399			0.602521	0.518451	0.218789	0.156177	0.409586	0.223323	0.698234	0.120321	1.6787	0.287097	0.741526	0.520991	0.482253	0.213165	0.880989	0.571511	0.277639	0.338105	0.392045	0.279198	0.181163	0.732366	0.0824853	0.884212	0.858607	1.1212			0.141398	0.470837	0.20408	0.0430691	0.48163	0.564895	0.861766	0.64648	0.254237	1.5243	0.57361	0.684787	0.434653	0.600579	1.50266	0.326469	0.683581	0.751071	0.382074
17.536			0.750822	0.426	0.386203	0.123837	0.433715	0.287755	0.787532	0.0357444	1.73806	0.323168	0.75802	0.580001	0.280887	0.203076	0.809622	0.590401	0.241	0.446136	0.3039	0.258076	0.213354	0.685845	0.136608	0.922388	0.885472	1.02344			0.225171	0.47709	0.365482	0	0.686808	0.534503	0.845988	0.594832	0.261894	1.62523	0.475119	0.635511	0.345782	0.61938	1.67895	0.224112	0.697499	0.687747	0.445222
17.673			0.784009	0.461235	0.222286	0.186736	0.483038	0.306763	0.70064	0.0584752	1.60785	0.293668	0.610807	0.558661			0.689604	0.609498	0.201572	0.522515	0.243508	0.300027	0.204008	0.664889	0.158514	0.926821	0.823208	0.830125			0.425868	0.537719	0.258059	0.0351741	0.715999	0.597564	0.732454	0.595257	0.329531	1.4215	0.456964	0.624658	0.299976	0.598203	1.73378	0.178282	0.759166	0.631506	0.539859
17.81			0.582007	0.519701	0.259554	0.23202	0.650314	0.33852			1.30632	0.255347	0.547566	0.550122			0.588325	0.578041	0.176227	0.624777	0.254502	0.367937	0.160833	0.622999	0.141075	0.852367	0.764892	0.914722			0.379049	0.547202	0.276046	0.0973195	0.683474	0.632956	0.533512	0.669787	0.384549	1.26792	0.444705	0.704455	0.395086	0.623721	1.84092	0.249246	0.81622	0.584528	0.592465
17.947			0.603421	0.541245	0.277593	0.233552	0.493789	0.318595			1.14566	0.209787	0.476649	0.401775			0.491569	0.526855	0.148783	0.72407	0.303829	0.364279	0.137877	0.606929	0.130049	0.792256	0.782542	0.945888			0.375291	0.614247	0.313404	0.0785549	0.588111	0.553623	0.532762	0.669486	0.314441	1.1509	0.453555	0.739774	0.492816	0.654372	1.91235	0.157958	0.932777	0.462795	0.571639
18.084			0.576822	0.561289	0.335429	0.206914	0.502564	0.407512			1.28734	0.261951	0.624851	0.48635			0.424555	0.510259	0.175998	0.739364	0.355656	0.355175	0.193938	0.609733	0.177972	0.807894	0.921773	1.04278			0.33425	0.513341	0.268531	0.0435536	0.654223	0.489984	0.377409	0.825016	0.199	1.21114	0.376633	0.825056	0.592639	0.613789	1.99135	0.1263	0.617796	0.415558	0.584197
18.221			0.580854	0.537685	0.393003	0.241346	0.483372	0.470332			1.44065	0.277315	0.600288	0.454219			0.403595	0.482522	0.161294	0.720052	0.429431	0.347532	0.187953	0.592106	0.221019	0.771192	1.22121	0.987134			0.255026	0.553142	0.366611	0.107152	0.717458	0.540846	0.362521	0.832751	0.168182	1.36402	0.484722	0.715956	0.580839	0.587232	1.97251	0.0904636	0.816532	0.303272	0.726987
18.358			0.685951	0.535646	0.351751	0.201939	0.629878	0.430336			1.59353	0.264603	0.671683	0.538817			0.386144	0.504339	0.222926	0.66018	0.610178	0.32348	0.178435	0.559438	0.213755	0.833301	1.54556	0.934225			0.224196	0.509946	0.423386	0.169294	0.684318	0.47214	0.400343	0.896803	0.0938377	1.32217	0.582874	0.761422	0.45066	0.588208	2.03189	0.0830137	0.837186	0.227474	0.962764
18.495			0.768413	0.521857	0.338282	0.229659	0.58041	0.445189			1.61808	0.280024	0.641673	0.51232			0.383279	0.551327	0.244555	0.650371	0.787601	0.319865	0.160223	0.53252	0.257948	0.787976	1.68518	0.890493			0.189112	0.56671	0.40186	0.145594	0.839463	0.474271	0.388218	0.919376	0.105	1.38075	0.633746	0.869545	0.565802	0.607553	1.75639	0.0727037	0.858025	0.241834	1.1372
18.632			0.6316	0.463079	0.398913	0.296952	0.691226	0.356081			1.43668	0.321074	0.565871	0.50203			0.407417	0.656836	0.252126	0.664844	0.705604	0.359306	0.186086	0.54998	0.297328	0.920605	1.85539	0.709489			0.264175	0.574305	0.40035	0.109316	1.26739	0.46027	0.449816	1.02704	0.112506	1.2251	0.52649	0.920037	0.688219	0.52961	1.59491	0.0744764	0.705806	0.191226	1.1493
18.769			0.697244	0.427047	0.35183	0.27807	0.69027	0.240637			1.44323	0.370325	0.292155	0.459631			0.412633	0.659574	0.207208	0.673288	0.454755	0.397011	0.219858	0.576566	0.357392	0.705855	1.84755	0.72772			0.270848	0.536336	0.330083	0.150699	1.29848	0.435007	0.204164	1.02377	0.129482	1.14431	0.41271	0.910741	0.742869	0.474587	1.5795	0.117868	0.833473	0.151374	1.27598
18.906			0.601141	0.439248	0.403604	0.226901	0.757148	0.220371			1.32977	0.361009	0.479185	0.480644			0.415513	0.711232	0.145283	0.683215	0.310807	0.415469	0.227821	0.563415	0.345471	0.658012	1.84393	0.576831			0.139805	0.467107	0.377054	0.161076	1.27108	0.544033	0.189822	0.997939	0.112872	1.05701	0.281636	0.92249	0.716946	0.429756	1.34209	0.0349812	0.803913	0.148124	1.61926
19.043			0.563824	0.427147	0.263579	0.187179	0.769954	0.178902			1.44416	0.46508	0.446689	0.493934			0.411307	0.82202	0.137749	0.700015	0.238757	0.420872	0.238592	0.540356	0.456619	0.637246	2.17157	0.604974			0.297487	0.578554	0.437834	0.185148	1.3765	0.425068	0.234916	0.963508	0.146531	1.13393	0.273432	0.919721	0.635627	0.267211	1.2181	0.0368273	0.837713	0.136237	1.78926
19.18			0.485931	0.393148	0.402583	0.127937	0.748184	0.0970459			1.41383	0.473215	0.459757	0.365303			0.393275	0.894517	0.110668	0.78028	0.244332	0.443488	0.262565	0.532548	0.405914	0.683141	2.45299	0.624226			0.210943	0.667554	0.562403	0.183319	1.26967	0.331179	0.135546	0.934628	0.181329	1.01648	0.332904	0.888482	0.527869	0.367326	1.09428	0.0174995	0.811028	0.0985604	1.7403
19.317			0.638563	0.462462	0.290691	0.168911	0.65436	0.114985			1.36046	0.566462	0.545083	0.282818			0.403967	0.916174	0.101695	0.760367	0.273815	0.493498	0.31184	0.527677	0.435061	0.668369	2.7483	0.616938			0.287466	0.609748	0.438157	0.175566	1.19229	0.297988	0.164038	0.980867	0.130647	0.913629	0.417531	0.958205	0.390169	0.305367	1.18713	0.0998531	0.770563	0.0616351	1.70005
19.454			0.60548	0.379656	0.283964	0.179521	0.60222	0.112858			1.18713	0.562158	0.466887	0.24844			0.427211	0.94615	0.103302	0.730335			0.392833	0.511855	0.519102	0.618084	2.69086	0.646109			0.342095	0.529155	0.376	0.176678	1.14075	0.353563	0.134097	0.914626	0.141825	1.05241	0.409016	0.886038	0.391644	0.289405	1.12223	0.0571337	0.827294	0.0728593	1.50067
19.591			0.55378	0.356576	0.354835	0.134634	0.600926	0.166371			0.948974	0.623642	0.648458	0.165591			0.480657	0.933112	0.0619551	0.690016			0.413537	0.513323	0.614521	0.696349	2.31901	0.693942			0.221356	0.577447	0.31009	0.170537	1.13764	0.383952	0.218173	0.982036	0.211076	0.97471	0.50678	0.890996	0.333247	0.362673	0.944508	0.0664878	0.774297	0.0471706	1.17382
19.728			0.475801	0.334669	0.303302	0.141985	0.656953	0.129181			0.786874	0.673403	0.615102	0.103427			0.537796	0.885569	0.021452	0.652264			0.376679	0.531022	0.618088	0.68257	1.83381	0.687419			0.290797	0.54642	0.308759	0.174207	1.12392	0.343431	0.176021	0.937751	0.228308	1.08004	0.711533	1.13187	0.43836	0.335702	0.818376	0.0796579	0.687269	0.0639808	1.12595
19.865			0.501518	0.35557	0.215632	0.239355	0.615778	0.0326424			0.611952	0.618466	0.38314	0.196522			0.635155	0.864602	0.0709776	0.599318			0.375269	0.494077	0.754431	0.702397	1.344	0.722507			0.433222	0.498811	0.309387	0.203653	1.17074	0.347972	0.188766	0.982555	0.223743	1.271	0.7758	1.08415	0.457232	0.321029	0.879551	0.0596423	0.757463	0.0765644	1.26098
20.002			0.331843	0.411542	0.254455	0.177934	0.62407	0.0734666			0.42811	0.571814	0.403862	0.21961			0.720824	0.805764	0.0880699	0.591188			0.444741	0.458907	0.79983	0.713031	1.19145	0.677839			0.357634	0.413397	0.296656	0.232112	1.13381	0.341979	0.183914	0.971286	0.156967	1.08478	0.81272	1.08835	0.359461	0.288283	0.882878	0.0837319	0.795151	0.0297844	1.4034
20.139			0.31142	0.40515	0.123843	0.220103	0.498442	0.0297838			0.348097	0.478587	0.427086	0.180774			0.794355	0.6864	0.108483	0.599399			0.515337	0.394944	0.794361	0.649168	1.0662	0.674103			0.511852	0.370322	0.321865	0.181054	1.09404	0.339137	0.354862	1.046	0.14523	1.03569	0.847246	1.07679	0.405048	0.268254	0.796351	0.10305	0.731617	0	1.46825
20.276			0.368527	0.377777	0.163801	0.286237	0.492724	0.0617237			0.253974	0.45626	0.361558	0.22845			0.816391	0.570756	0.136826	0.578312			0.648243	0.381186	0.707129	0.577731	1.06409	0.716217			0.478777	0.331874	0.306903	0.206173	1.16729	0.402826	0.26667	0.889817	0.177667	1.0047	0.79797	1.12455	0.427239	0.309835	0.780374	0.097734	0.668236	0.0280987	1.40381
20.413			0.324211	0.394678	0.176753	0.20572	0.544501	0.0686468			0.202243	0.415323	0.377311	0.16818			0.75938	0.456726					0.83447	0.413882	0.643458	0.570209	1.14899	0.70043			0.481196	0.335368	0.244313	0.240014	1.03025	0.309409	0.235598	0.756673	0.187686	1.08885	0.759441	1.10405	0.412064	0.353686	0.886177	0.0556695	0.623469	0.0363691	1.21658
20.55			0.256489	0.349834	0.193018	0.194705	0.504614	0.0444909			0.263578	0.372925	0.362036	0.244423			0.675916	0.417652					0.95708	0.37335	0.614166	0.550789	1.38392	0.642651			0.523518	0.324036	0.281665	0.323933	0.994763	0.322839	0.183723	0.735611	0.085193	1.12002	0.674444	1.03361	0.413355	0.318936	1.02934	0	0.484728	0.0232565	1.02596
20.687			0.29239	0.330176	0.114609	0.189136	0.505978	0.0228972			0.257271	0.44712	0.291831	0.230257			0.712229	0.432902					1.03711	0.309353	0.689026	0.543518	1.42304	0.664329			0.648165	0.287952	0.299705	0.300086	0.917277	0.32118	0.130282	0.692951	0.0910641	1.09972	0.554234	0.950511	0.39144	0.276945	1.21403	0.033168	0.475803	0.0355114	0.973776
20.824			0.269814	0.343748	0.166293	0.22335	0.490902	0.0608222			0.303106	0.359644	0.364074	0.268029			0.73526	0.438648					1.01965	0.295189	0.64835	0.546149	1.536	0.658393			0.726437	0.258688	0.289504	0.278249	0.627951	0.380947	0.169517	0.73626	0.0932788	1.25102	0.550206	0.886165	0.425069	0.247707	1.37592	0.0454101	0.516943	0.0695595	0.912778
20.961			0.232365	0.348427	0.124963	0.216688	0.50547	0.101427			0.269384	0.354276	0.419723	0.25887			0.784035	0.42699					0.990189	0.321526	0.684743	0.585778	1.5335	0.682347			0.917622	0.286149	0.253368	0.335828	0.361217	0.27447	0.215373	0.702562	0.13646	1.27061	0.607062	0.875588	0.336101	0.24134	1.3603	0.0711232	0.457373	0.113695	1.00888
21.098			0.263878	0.350314	0.155834	0.27565	0.585447	0.149702			0.139363	0.34645	0.285927	0.258426			0.81388	0.460014					0.764209	0.308895	0.675669	0.609124	1.34111	0.536652			0.853682	0.249721	0.293037	0.35179	0.384229	0.300777	0.256229	0.728899	0.224808	1.32435	0.738604	0.784719	0.304668	0.271507	1.1738	0.0708222	0.583628	0.108539	0.884567
21.235			0.335992	0.422261	0.24554	0.234637	0.695193	0.129826			0.131967	0.38111	0.389809	0.229303			0.751873	0.46603					0.583918	0.281621	0.660357	0.679884	1.27506	0.55499			1.11169	0.299878	0.380023	0.346036	0.405704	0.330634	0.294683	0.715683	0.26542	1.64883	0.74843	0.68274	0.240413	0.314436	1.09373	0.0309629	0.520002	0.098553	0.659157
21.372			0.441402	0.417901	0.240059	0.27432	0.655858	0.142381			0.0837833	0.466798	0.379328	0.241236			0.669106	0.46386					0.565855	0.295583	0.847097	0.547048	1.23084	0.496339			1.13715	0.267019	0.329449	0.404534	0.403277	0.367165	0.28313	0.76741	0.153144	1.45358	0.786299	0.738122	0.23277	0.226094	0.975697	0.0597081	0.474785	0.125668	0.726824
21.509			0.70333	0.50139	0.273023	0.347032	0.589474	0.126533			0.1526	0.44714	0.417212	0.237673			0.514314	0.427181					0.672764	0.302423	0.874783	0.559524	1.23772	0.571134			1.22163	0.257546	0.252042	0.421782	0.476025	0.431872	0.234363	0.741247	0.226715	1.60997	0.668085	0.880559	0.26527	0.241944	0.774436	0.103932	0.446217	0.144359	0.834939
21.646			0.562548	0.505886	0.231044	0.228325	0.521875	0.164231			0.251083	0.462624	0.387144	0.179895			0.604792	0.442278					0.758269	0.276967	0.981211	0.601897	1.36957	0.493007			1.68957	0.193364	0.167926	0.519856	0.598399	0.402175	0.19952	0.705378	0.278985	1.46254	0.756679	0.598733	0.308819	0.235524	0.743825	0.112376	0.379558	0.115751	0.793467
21.783			0.529357	0.560559	0.165817	0.259354	0.487627	0.0911176			0.320404	0.528524	0.337947	0.256198			0.596808	0.447393					0.739196	0.253652	1.16824	0.535952	1.37052	0.429764			2.13584	0.172578	0.137306	0.603583	0.694483	0.344588	0.225765	0.711402	0.149529	1.46893	0.724438	0.599884	0.300369	0.290095	0.676828	0.124054	0.277645	0.208723	0.704403
21.92					0.247613	0.282107	0.618027	0.168795			0.437444	0.494764	0.313559	0.262858			0.58495	0.463482					0.63338	0.256518	1.25794	0.454329	1.23943	0.361179			2.20886	0.0905923	0.237126	0.453508	0.671229	0.488411	0.257402	0.629683	0.192988	1.52001	0.897347	0.668268	0.338148	0.308063	0.678502	0.164826	0.242699	0.186917	0.833619
22.057					0.146306	0.370251	0.507356	0.138317			0.428777	0.497763	0.365379	0.26344			0.58799	0.455907					0.575902	0.252564	1.22294	0.420348	0.912361	0.279789			1.94527	0.0986011	0.269851	0.495225	0.695048	0.445461	0.308926	0.654303	0.144802	1.4331	1.17269	0.663729	0.241419	0.29968	0.692301	0.20905	0.259794	0.253427	0.976175
22.194					0.247314	0.318457	0.434964	0.137951			0.412621	0.585761	0.248912	0.321135			0.59008	0.43283					0.558631	0.273994	1.26059	0.467055	0.89376	0.29189			1.66943	0.07268	0.167557	0.535237	0.538366	0.436413	0.425408	0.672073	0.152611	1.4397	1.31877	0.508821	0.17235	0.322024	0.618738	0.199777	0.335793	0.348112	0.854932
22.331					0.199624	0.305567	0.386194	0.122087			0.222353	0.544801	0.265605	0.398716			0.665474	0.439504					0.570998	0.295908	1.38296	0.449728	0.95371	0.245367			1.55831	0.08722	0.123226	0.472933	0.334465	0.633907	0.514238	0.642453	0.138696	1.22929	1.45709	0.456141	0.193101	0.342327	0.59605	0.182763	0.303865	0.341171	0.616926
22.468					0.14383	0.333528	0.429186	0.212697			0.242203	0.521341	0.271396	0.393676			0.651086	0.45473					0.61942	0.266398	1.55506	0.49331	0.941331	0.230467			1.43033	0.103684	0.173384	0.577892	0.153435	0.543428			0.229248	1.24421	1.49023	0.543938	0.240745	0.333444	0.672558	0.203414	0.376151	0.374646	0.533832
22.605					0.0960507	0.390301	0.389573	0.213915			0.246099	0.481796	0.233109	0.412535			0.644927	0.463254					0.68946	0.27857	1.81157	0.501676	1.06346	0.214619			1.31623	0.0911768	0.229588	0.596495	0.132854	0.511421			0.24579	1.23892	1.73244	0.492819	0.184063	0.38898	0.677536	0.207925	0.345583	0.343561	0.552446
22.742					0.251	0.267522	0.338558	0.157263			0.20126	0.498405	0.201623	0.519886			0.647412	0.445722					0.657105	0.281244	1.8258	0.426266	1.17958	0.255202			1.15471	0.158242	0.147991	0.596259	0.11287	0.537654			0.216101	1.02918	2.01794	0.430437	0.244314	0.387892	0.665654	0.239348	0.272592	0.378749	0.536043
22.879							0.316146	0.11678			0.131892	0.603169	0.206263	0.536483			0.644808	0.420698					0.6122	0.282412	1.85497	0.3638	1.049	0.310007			1.03693	0.174949			0.113189	0.570573			0.170705	0.911319	1.90795	0.405398	0.28838	0.312865	0.532265	0.284361	0.200004	0.347452	0.4591
23.016							0.312224	0.149877			0.166579	0.715508	0.19678	0.422006			0.650624	0.402255					0.599147	0.315602	1.61701	0.295708	0.964692	0.268328			0.816635	0.198447			0.208534	0.560936			0.161005	0.984869	1.56888	0.29653	0.330009	0.274366	0.564462	0.251337	0.245901	0.37206	0.501481
23.153							0.295332	0.155671			0.128569	0.723692	0.193661	0.41856			0.713135	0.417957					0.588075	0.323575	1.32349	0.262666	0.83567	0.246372			0.613179	0.219646			0.184118	0.584677			0.156288	0.804211	1.40489	0.318706	0.301655	0.305672	0.539588	0.304574	0.238183	0.358011	0.590678
23.29							0.355112	0.196443			0.147688	0.638058	0.198064	0.447285			0.7135	0.421674					0.665979	0.328822	1.23063	0.23901	0.79041	0.223929			0.455428	0.323399			0.0995037	0.615298			0.171504	0.751273	1.05908	0.268446	0.28625	0.276767	0.370277	0.339019	0.498646	0.341853	0.621287
23.427							0.305938	0.218443			0.195436	0.536875	0.218919	0.392003			0.671241	0.403683					0.719727	0.30867	1.26689	0.231826	0.645559	0.293919			0.409123	0.290116			0.112268	0.490127			0.235694	0.820603	1.15408	0.271715	0.289447	0.224008	0.41379	0.327167	0.600779	0.413299	0.507808
23.564							0.25216	0.26364			0.19456	0.436872	0.229774	0.45882			0.64514	0.313022					0.663498	0.278819	1.28549	0.130292	0.730832	0.255438			0.259557	0.34114			0.107097	0.518464			0.0948562	0.85888	1.10542	0.273283	0.305245	0.196423	0.454864	0.367038	0.593899	0.354138	0.468772
23.701							0.257336	0.227745			0.192315	0.340589					0.666256	0.303671					0.580721	0.27951	1.45616	0.162027	0.843175	0.221709			0.276528	0.360563			0.155487	0.526439			0.118889	0.937822	1.09468	0.294244	0.26673	0.195167	0.36409	0.451504	0.593331	0.420153	0.404541
23.838							0.431625	0.224066			0.155562	0.275284					0.713358	0.285342					0.610158	0.287739	1.4052	0.176716	1.07637	0.188057			0.214989	0.308652			0.154151	0.632916			0.172162	1.01627	1.06581	0.287218	0.286128	0.269164	0.365769	0.40995	0.545019	0.47262	0.314657
23.975							0.289668	0.210354			0.123603	0.286411					0.734582	0.276379					0.651961	0.295086	1.32877	0.172913	1.52614	0.202347			0.192246	0.396624			0.15033	0.619331					0.873181	0.353953	0.252408	0.242256	0.391113	0.395566	0.348673	0.495869	0.29084
24.112							0.282854	0.198132			0.108034	0.240635					0.796911	0.277506					0.588113	0.29398	1.16142	0.15298	2.03764	0.248417			0.0993874	0.321954			0.0881528	0.751493					0.813058	0.303959	0.299715	0.292665	0.371869	0.394792	0.141089	0.511122	0.426296
24.249							0.312179	0.208754			0.167747	0.306462					0.72047	0.253945					0.507264	0.294326	1.18646	0.163654	2.22872	0.155348			0.121189	0.415397			0.112255	0.828655					0.817711	0.301377	0.23903	0.304075	0.401087	0.30813	0.130117	0.451549	0.511615
24.386							0.327797	0.189199			0.167419	0.385121					0.609609	0.229883					0.527949	0.28705	1.33656	0.15171	2.19339	0.229032			0.0450239	0.424144			0.148113	0.817303					0.894584	0.414918	0.268829	0.264361	0.400325	0.330854	0.197431	0.524855	0.547522
24.523							0.358038	0.221805									0.5574	0.222377					0.588437	0.239702	1.44532	0.167479	1.93575	0.264695			0.0863766	0.468043			0.145897	0.859758					0.777516	0.421451	0.2022	0.290372	0.402559	0.417936	0.199155	0.562411	0.355088
24.66							0.389966	0.296571									0.51523	0.23276					0.66213	0.237377	1.53536	0.180653	1.76582	0.224223			0.106204	0.496378			0.154315	0.853429					0.651223	0.335393	0.196517	0.34115	0.351137	0.550019	0.192295	0.522272	0.263804
24.797							0.355082	0.34831									0.506919	0.211948					0.791572	0.223666	1.68984	0.144671	1.32272	0.192706			0.0772218	0.481641			0.208539	0.835153					0.514507	0.355222	0.161561	0.330385	0.370543	0.560564	0.212474	0.485577	0.243312
24.934							0.297158	0.333984									0.498715	0.199288					0.940499	0.207101	1.60926	0.134106	1.01863	0.20194			0.0605629	0.470397			0.262324	0.722946					0.527198	0.289591			0.3661	0.592149	0.11582	0.445631	0.147367
25.071							0.303151	0.346206									0.459727	0.208616					0.898882	0.215724	1.44241	0.138688	0.760428	0.250466			0.134633	0.530606			0.275467	0.724737					0.490002	0.328404			0.407379	0.665116	0.238443	0.526699	0.117116
25.208							0.37287	0.353385									0.479108	0.190309					0.890165	0.227896	1.23813	0.18188	0.587482	0.256642			0.127666	0.522			0.243034	0.758586					0.572758	0.351177			0.403612	0.737122	0.200556	0.423929	0.153244
25.345							0.565887	0.388549									0.492624	0.168439					0.928581	0.210259	1.24349	0.118799	0.563137	0.246033							0.212087	0.745835					0.591599	0.304449			0.48007	0.704758	0.215201	0.385986	0.193276
25.482							0.695008	0.427351									0.505659	0.168					0.904826	0.223448	1.19039	0.113886	0.688785	0.185578							0.181833	0.7536					0.608858	0.320988			0.470858	0.709896	0.149298	0.383069	0.104237
25.619							0.601713	0.32702									0.569251	0.167414					0.853779	0.225379	1.11752	0.0976145	0.733652	0.176828							0.229959	0.843251					0.668054	0.323909			0.425278	0.682871	0.190111	0.510519	0.0597367
25.756							0.318301	0.342523									0.55056	0.183131					0.895384	0.216052	1.41302	0.124582	0.570724	0.0743119							0.221855	0.755977					0.628144	0.38238			0.318731	0.654105	0.0757335	0.59854	0.0882014
25.893							0.331465	0.336161									0.499304	0.190257					0.943745	0.200786	1.70725	0.070858	0.525895	0.13203							0.206714	0.745141					0.497868	0.498895			0.270786	0.562979	0.176152	0.622009	0.124705
26.03							0.257735	0.293083									0.469458	0.19018					0.956836	0.181865	2.14383	0.0990702	0.72385	0.192854							0.135777	0.710753					0.332124	0.517596			0.156341	0.477088	0.179983	0.736586	0.206821
26.167							0.244914	0.297574									0.433719	0.196564					0.984897	0.178626	2.27686	0.0938696	1.07142	0.123653							0.182563	0.765846					0.234832	0.469414			0.241526	0.603435	0.187257	0.807419	0.312258
26.304							0.290798	0.301232									0.400476	0.212127					0.983339	0.202297	2.34303	0.0761023	1.4062	0.0976228							0.296158	0.759221					0.269844	0.584009			0.23661	0.606495	0.189278	0.811833	0.404195
26.441							0.340827	0.264095									0.413732	0.187479					0.954832	0.214054	2.26873	0.0652425	1.53597	0.11341							0.235618	0.603987					0.279492	0.548587			0.24534	0.578122	0.150495	0.796121	0.350602
26.578							0.365375	0.237629									0.421537	0.183747					0.904258	0.231328	2.21605	0.0769649	1.65553	0.183651							0.390508	0.645611					0.301234	0.584718			0.243723	0.627351	0.152843	0.765034	0.301178
26.715							0.544506	0.283597									0.404537	0.198756					0.825291	0.253591	2.12549	0.0864781	1.38043	0.111757							0.321509	0.615724					0.230768	0.572649			0.186502	0.56765	0.140347	0.730457	0.146589
26.852							0.52409	0.356175									0.350875	0.232249					0.743608	0.275761	1.85929	0.0607698	1.09085	0.0865195							0.295437	0.51048					0.278815	0.521819			0.173821	0.608369	0.153743	0.697555	0.153611
26.989							0.279066	0.309349									0.356601	0.235742					0.743738	0.26774	1.51517	0.0393704	0.914104	0.103076							0.259351	0.589726					0.290967	0.565221			0.179139	0.628569	0.12071	0.553587	0.121285
27.126							0.207655	0.251199									0.373466	0.258447					0.693323	0.245147	1.34761	0.0410118	0.58618	0.14445							0.239527	0.590883					0.289585	0.634709			0.20247	0.528524	0.158909	0.476323	0.0955279
27.263							0.177538	0.290338									0.400465	0.263033					0.642509	0.25851	1.15381	0.0663453	0.445807	0.159929							0.238574	0.615561					0.266997	0.674109			0.143774	0.434384	0.0249717	0.445767	0.119303
27.4							0.143097	0.160215									0.433582	0.255902					0.561965	0.284932	1.1822	0.0813321	0.266719	0.107706							0.291169	0.572733					0.254564	0.650318			0.139594	0.392795	0.139073	0.42695	0.102679
27.537							0.204076	0.328356									0.415546	0.248108					0.577483	0.317746	1.33724	0.103536	0.260208	0.0605926							0.165265	0.544229					0.316572	0.547389			0.170613	0.394074	0.140066	0.409176	0.102238
27.674							0.250961	0.393215									0.361645	0.251683					0.649321	0.344459	1.36872	0.0798145	0.152261	0.0744984							0.295811	0.570932					0.292304	0.682656			0.141973	0.366414	0.0964904	0.45096	0.130111
27.811							0.226852	0.454934									0.336587	0.229967					0.735119	0.318033	1.5424	0.113187	0.112059	0.0931145							0.278687	0.570569					0.423717	0.697977			0.13928	0.34964	0.0887769	0.433367	0.166244
27.948																	0.276975	0.267944					0.796514	0.27507	1.39137	0.128731	0.100568	0.109693							0.21319	0.57032					0.352886	0.656982			0.0994256	0.348555	0.0700353	0.437284	0.121835
28.085																	0.259584	0.251817					0.889026	0.237518	0.909224	0.0745374	0.117302	0.11708							0.221864	0.543335					0.289621	0.580357			0.0965854	0.334235	0.013161	0.442994	0.0690958
28.222																	0.295401	0.190679					1.07752	0.232173	0.640993	0.183543	0.104724	0.0951859							0.227209	0.468138					0.202249	0.576178			0.123391	0.3016	0.159922	0.415501	0.178885
28.359																	0.348006	0.236167					1.1745	0.216221	0.588554	0.242784	0.0289735	0.130773							0.203463	0.483332					0.219289	0.59785			0.105129	0.198829	0.0851145	0.382548	0.131273
28.496																	0.331908	0.230133					1.09561	0.206748	0.519247	0.196623	0.0821321	0.119826													0.246432	0.682404			0.0789747	0.189614	0.0836158	0.379317	0.176973
28.633																							0.874989	0.204456	0.492059	0.149304	0.0940264	0.0579386													0.293204	0.646868			0.111764	0.264361	0.129084	0.407935	0.248014
28.77																							0.689932	0.203452	0.470296	0.178455	0.101683	0.113992													0.250112	0.686848			0.128845	0.189381	0.14003	0.393181	0.27131
28.907																							0.669152	0.201608	0.405401	0.221429	0.0935411	0.128961													0.245973	0.773776			0.135729	0.0939256	0.19072	0.531358	0.17457
29.044																							0.708182	0.200945	0.371214	0.254659	0.0787621	0.0852667													0.262011	0.756118			0.141831	0.149059			0.211328
29.181																							0.751777	0.201301	0.357083	0.248575	0.0738642	0.111361													0.299033	0.670007			0.122553	0.0869283			0.244295
29.318																							0.789664	0.219494	0.31884	0.208018	0.0616213	0.146872													0.417046	0.629227			0.143389	0.0760822			0.237214
29.455																							0.672337	0.247214	0.270241	0.201561	0.0414044	0.213481													0.443235	0.639959			0.17157	0.0847813			0.16791
29.592																							0.504205	0.297901	0.313446	0.348263	0.0938384	0.225136													0.415789	0.704462			0.175569	0.021495			0.206279
29.729																							0.473633	0.376766	0.180717	0.391412	0.0898532	0.258092													0.413356	0.685885							0.213868
29.866																							0.600865	0.404583	0.217465	0.395673	0.13269	0.349836													0.416275	0.608501							0.210957
30.003																							0.724508	0.421276	0.223552	0.45217	0.121988	0.461251													0.434826	0.561951							0.145047
30.14
30.277
30.414
30.551
30.688
30.825
30.962
31.099
31.236
31.373
31.51
31.647
31.784
31.921
32.058
32.195
32.332
32.469
32.606
32.743
32.88
33.017
33.154
33.291
33.428
33.565
33.702
33.839
33.976
34.113
34.25
34.387
34.524
34.661
34.798
34.935
35.072
35.209
35.346
35.483
35.62
35.757
35.894
36.031
36.168
36.305
36.442
36.579
36.716
36.853
36.99
37.127
37.264
37.401
37.538
37.675
37.812
37.949
38.086
38.223
38.36
38.497
38.634
38.771
38.908
39.045
39.182
39.319
39.456
39.593
39.73
[truncated: 23 more columns]

## Sheet: 5C
Figure 6 - figure supplement 5C Plot Intensity Profile WIF1-AQP4
Figure 6 - figure supplement 5C Plot Intensity Profile WIF1-AQP4-MYC (Normalized Pixel Intensity measured from basal to apical side of progenitor cells )
	Cell 1		Cell 2		Cell 3		Cell 4		Cell 5		Cell 6		Cell 7		Cell 8		Cell 9		Cell 10		Cell 11		Cell 12		Cell 13		Cell 14		Cell 15		Cell 16		Cell 17		Cell 18		Cell 19		Cell 20		Cell 21		Cell 22		Cell 23		Cell 24		Cell 25
	Normalized Pixel Intensity	Normalized Pixel Intensity	Normalized Pixel Intensity	Normalized Pixel Intensity	Normalized Pixel Intensity	Normalized Pixel Intensity	Normalized Pixel Intensity	Normalized Pixel Intensity	Normalized Pixel Intensity	Normalized Pixel Intensity	Normalized Pixel Intensity	Normalized Pixel Intensity	Normalized Pixel Intensity	Normalized Pixel Intensity	Normalized Pixel Intensity	Normalized Pixel Intensity	Normalized Pixel Intensity	Normalized Pixel Intensity	Normalized Pixel Intensity	Normalized Pixel Intensity	Normalized Pixel Intensity	Normalized Pixel Intensity	Normalized Pixel Intensity	Normalized Pixel Intensity	Normalized Pixel Intensity	Normalized Pixel Intensity	Normalized Pixel Intensity	Normalized Pixel Intensity	Normalized Pixel Intensity	Normalized Pixel Intensity	Normalized Pixel Intensity	Normalized Pixel Intensity	Normalized Pixel Intensity	Normalized Pixel Intensity	Normalized Pixel Intensity	Normalized Pixel Intensity	Normalized Pixel Intensity	Normalized Pixel Intensity	Normalized Pixel Intensity	Normalized Pixel Intensity	Normalized Pixel Intensity	Normalized Pixel Intensity	Normalized Pixel Intensity	Normalized Pixel Intensity	Normalized Pixel Intensity	Normalized Pixel Intensity	Normalized Pixel Intensity	Normalized Pixel Intensity	Normalized Pixel Intensity
(basal to apical distance um)	MYC - Tag	DAPI	MYC - Tag	DAPI	MYC - Tag	DAPI	MYC - Tag	DAPI	MYC - Tag	DAPI	MYC - Tag	DAPI	MYC - Tag	DAPI	MYC - Tag	DAPI	MYC - Tag	DAPI	MYC - Tag	DAPI	MYC - Tag	DAPI	MYC - Tag	DAPI	MYC - Tag	DAPI	MYC - Tag	DAPI	MYC - Tag	DAPI	MYC - Tag	DAPI	MYC - Tag	DAPI	MYC - Tag	DAPI	MYC - Tag	DAPI	MYC - Tag	DAPI	MYC - Tag	DAPI	MYC - Tag	DAPI	MYC - Tag	DAPI	MYC - Tag	DAPI	MYC - Tag
0	0.0753981	0	0.0368004	0.654486	0	0.0576427	0.0712265	0.0125631	0.0693249	0.238621	0	0.251857	0.0256673	0.296339	0.0988968	0.286414	0.000137737	0.0509114	0.125516	0.0887971	0.321405	0.336509	0.147225	0.0750237	0.0568864	0.183468	0.240899	0.155667	0.023906	0.481702	0.0441138	0.0311114	0.137311	0.250183	0.0352792	0.174501	0	0	0.136873	0.151815	0.231218	0.0329748	0.107573	0.177715	0.15154	0.0807197	0.0334246	0.100028	0.128633
0.137	0.0285819	0.0921996	0.0627649	0.716964	0.0493237	0.104049	0.0635284	0.0404778	0.0612185	0.218948	0.000772338	0.311702	0.0692956	0.286829	0.0859966	0.309285	0.115279	0.0538706	0.119829	0.111748	0.296043	0.263855	0.131712	0.05756	0.0443701	0.0953755	0.138015	0.0487416	0.0490399	0.477115	0.0622024	0.00187004	0.191688	0.124557	0.0899679	0.163134	0.0857231	0.0558443	0.0944705	0.137416	0.360642	0.0944681	0.14481	0.370362	0.107862	0.0865621	0.117314	0.114056	0.0813493
0.274	0.0220902	0.0579326	0.137639	0.737557	0.0502222	0.153217	0.0895383	0.0395774	0.042735	0.240153	0.0368536	0.21415	0.0506316	0.30981	0.0779178	0.33902	0.108957	0.0540207	0.0789287	0.161478	0.32554	0.271887	0.278261	0.0789114	0.0552121	0.131362	0.149637	0.0431183	0.0365116	0.476817	0.0563257	0	0.159541	0.227691	0.0486306	0.246939	0.0513002	0.0249055	0.0207814	0.136437	0.306611	0.0804497	0.1646	0.355214	0.072174	0.103985	0.121357	0.0553585	0.143597
0.411	0.114579	0.0716259	0.139794	0.608824	0.0426169	0.198101	0.0816794	0.0724482	0.0324623	0.115563	0.0612624	0.225077	0.0571144	0.38153	0.0807499	0.22606	0.0421838	0.0364369	0.0809086	0.158941	0.388615	0.193897	0.271225	0.0687989	0.0445665	0.138785	0.168904	0.0526968	0.0761549	0.420215	0.0634793	0.0751167	0.148156	0.184494	0.0267303	0.291769	0.0424494	0.0442966	0.0928556	0.17431	0.265131	0.0692489	0.158021	0.418628	0.0422352	0.196486	0.23205	0.112901	0.13734
0.548	0.134324	0.0373056	0.10913	0.606977	0.0356941	0.198904	0.140278	0.0741863	0	0.105169	0.0561839	0.225334	0.0353257	0.378459	0.0735064	0.29793	0.0709636	0	0.0843243	0.139524	0.407644	0.132076	0.392892	0.0228579	0.100051	0.119885	0.271974	0.0308262	0.11998	0.465503	0.0358032	0.0915092	0.163897	0.09539	0.0351619	0.284866	0.0538916	0.038875	0.0393802	0.111116	0.289943	0.0752672	0.159599	0.225924	0.0436559	0.116027	0.12276	0.118126	0.0822327
0.685	0.237669	0.0255492	0.0939846	0.451766	0.0822586	0.16202	0.309587	0.0402235	0.0408976	0.0818622	0.0579982	0.288459	0.0502479	0.373693	0.0684647	0.348793	0.160804	0.0515204	0.0951534	0.0862599	0.503503	0.108821	0.387627	0.0453491	0.11742	0.0930255	0.256729	0.123505	0.121655	0.452896	0.0221451	0.03452	0.235899	0.108442	0.149942	0.305841	0.0586188	0.0427144	0.159207	0.107673	0.461288	0.0620627	0.162503	0.226874	0.0355267	0.106085	0.170281	0.105563	0.0468286
0.822	0.433169	0.0747463	0.303671	0.460279	0.131224	0.0959283	0.497551	0.0691094	0.0469631	0.0805085	0.269553	0.259413	0.0337223	0.403632	0.110074	0.329504	0.137418	0.0287516	0.210776	0.0303599	0.597258	0.161028	0.332765	0.0710123	0.101123	0.095824	0.249519	0.167822	0.0971411	0.345188	0.0614969	0.116384	0.247247	0.0513533	0.0445113	0.185208	0.0684479	0.0541061	0.157361	0.126003	0.542651	0.0597196	0.105299	0.190782	0.0555568	0.0760034	0.208373	0.0927085	0.104788
0.959	0.37689	0.037924	0.263967	0.350381	0.168504	0.149153	0.571805	0.136193	0.031815	0.0837896	0.200546	0.158209	0.0474142	0.265236	0.162844	0.343294	0.129009	0.0371017	0.300679	0.149629	0.717683	0.199053	0.412304	0	0.0586289	0.074337	0.272999	0.0967793	0.117435	0.433239	0.102161	0.149419	0.160069	0.0707775	0.00428484	0.14519	0.0903504	0.106263	0.192725	0.111449	0.631023	0.105899	0.126987	0.111318	0.128756	0.0993099	0.16816	0.0634745	0.089393
1.096	0.352244	0.0166715	0.17807	0.379736	0.246172	0.194332	0.520799	0.10752	0.0881947	0	0.0627852	0.124241	0.0730693	0.255378	0.149268	0.277538	0.129132	0.0592486	0.34831	0.168524	0.75566	0.170462	0.407994	0.0777009	0.057042	0.177198	0.275266	0.0275836	0.0842805	0.333653	0.155982	0.111691	0.258678	0.0653697	0.0183262	0.214908	0.134024	0.185456	0.323478	0.0534723	0.714634	0.0761358	0.147895	0.0162974	0.0535135	0.109594	0.311683	0.0538698	0.053422
1.233	0.405434	0.0746645	0.115007	0.267036	0.359868	0.149423	0.469926	0.027352	0.249734	0.0721061	0.0578233	0.102316	0.0581448	0.250421	0.308209	0.185348	0.139636	0.0497405	0.203337	0.0547868	0.754477	0.184479	0.477709	0.074551	0.0584974	0.174875	0.180605	0.0064127	0.0741149	0.270652	0.135065	0.0553073	0.250371	0.0630095	0.108108	0.115326	0.0935524	0.238068	0.343947	0.0291231	0.760081	0	0.190744	0	0.147578	0.0481925	0.423216	0.0530574	0.100912
1.37	0.251808	0.0472708	0.061902	0.179043	0.425963	0.144947	0.392637	0	0.362577	0.0638001	0.0529707	0.0904588	0.0828402	0.17763	0.452792	0.178902	0.204279	0.0405541	0.220593	0.081164	0.902228	0.0937699	0.440886	0.0225044	0.0508442	0.106646	0.26044	0	0.0416498	0.120642	0.218932	0.0878305	0.291601	0.049755	0.100028	0.198276	0.0950346	0.248629	0.385668	0.0998727	0.639934	0.0325806	0.265919	0.01893	0.147314	0.0448067	0.285444	0.011144	0.0387425
1.507	0.26548	0.0222298	0.106999	0.0955722	0.415717	0.106886	0.398203	0.0781712	0.640998	0.150609	0.0989467	0.0947869	0.0981196	0.137017	0.370539	0.117478	0.158231	0.042291	0.263163	0.0990969	0.868013	0.160058	0.413574	0.0308895	0.123799	0.172673	0.448721	0.0835101	0.135471	0.0397927	0.186974	0.182298	0.343696	0.0631254	0.0666393	0.118946	0.11064	0.275087	0.404994	0.0970609	0.469561	0.0374712	0.165062	0.0336176	0.149284	0.0720899	0.32491	0.0758118	0.13425
1.644	0.255572	0.0793131	0.0871416	0.0765057	0.480207	0.0883902	0.498166	0.0707142	0.619326	0.154239	0.13913	0.110636	0.118091	0.10555	0.391852	0.0725898	0.221503	0.0460994	0.29949	0.0672267	1.16975	0.146978	0.304717	0.0636257	0.100088	0.184329	0.480613	0.118718	0.205681	0.0184663	0.137026	0.233456	0.428433	0.0618087	0.053978	0.102142	0.119078	0.305359	0.50048	0.029415	0.392049	0.0446063	0.233501	0.0452211	0.184774	0.0223996	0.428601	0.0377154	0.320942
1.781	0.348109	0.242446	0.189569	0.0527283	0.625394	0.152406	0.554856	0.0317578	0.699017	0.0874928	0.262857	0.134242	0.143009	0.0869338	0.415967	0.0708887	0.191534	0.0138354	0.305974	0.0421138	0.957502	0.188565	0.301665	0.0831834	0.050042	0.187329	0.375415	0.0454179	0.288865	0.0225212	0.170325	0.178116	0.456898	0.0678045	0	0.154534	0.103668	0.304941	0.543243	0.00911158	0.413132	0.171695	0.340282	0.0172469	0.249493	0	0.428174	0.0118475	0.224797
1.918	0.240875	0.255645	0.193818	0.111211	0.757752	0.118297	0.502501	0.100946	0.858024	0.124746	0.315529	0.190899	0.16552	0.116806	0.340585	0.057015	0.190005	0.0472488	0.313937	0.0633131	1.03224	0.170506	0.283363	0.0518786	0.11943	0.197887	0.43665	0.0316112	0.28056	0	0.142895	0.181447	0.458505	0.0470842	0.0487134	0.102483	0.0529752	0.275648	0.581221	0	0.293678	0.148388	0.460572	0.0374276	0.300406	0.0372658	0.329136	0	0.458805
2.055	0.208263	0.340783	0.16831	0.108077	0.866842	0.102268	0.446964	0.103306	0.798664	0.165243	0.313496	0.128949	0.221425	0.0924738	0.397281	0.056615	0.173752	0.0960973	0.400001	0.0592441	0.905763	0.160074	0.28792	0.0670318	0.103492	0.188917	0.506022	0.0603638	0.275078	0.0237488	0.0987252	0.14423	0.226529	0.0158673	0.153206	0.0831867	0.0574562	0.253527	0.658069	0.000871992	0.167908	0.20213	0.54892	0.0506561	0.366019	0.026945	0.228984	0.0519807	0.539734
2.192	0.165172	0.352358	0.168254	0.00931663	0.844125	0.202074	0.396476	0.110479	0.727382	0.255012	0.41108	0.110311	0.195216	0.145691	0.391783	0.0932256	0.160957	0.0908865	0.372555	0.0355206	0.756551	0.232352	0.361254	0.0890105	0.124939	0.1824	0.488869	0.070817	0.200699	0.0448256	0.106669	0.0920207	0.325746	0	0.256946	0.0849445	0.124468	0.256493	0.663436	0.0538788	0.209938	0.21994	0.570269	0.0459738	0.402798	0.133324	0.232599	0.0805928	0.652375
2.329	0.194269	0.43429	0.117722	0.0217416	0.901437	0.249008	0.300882	0.126206	0.804025	0.271496	0.406701	0.115304	0.227241	0.10364	0.298224	0.0503749	0.19044	0.101969	0.50222	0.00955759	0.703928	0.348367	0.408899	0.0830862	0.13716	0.17735	0.555974	0.114242	0.209846	0.011457	0.137894	0.14117	0.338367	0.0803302	0.329485	0.174838	0.102693	0.215492	0.427732	0.0272424	0.234716	0.149078	0.546906	0.0373774	0.310227	0.105647	0.157955	0.131641	0.712999
2.466	0.120481	0.509506	0.212989	0.0827644	0.939419	0.18082	0.249163	0.156688	0.558603	0.329257	0.379269	0.140564	0.267485	0.115986	0.255279	0.137457	0.1926	0.0578677	0.499165	0	0.593738	0.353944	0.367233	0.0901017	0.0667973	0.17169	0.522982	0.100777	0.221439	0.0458649	0.202438	0.167281	0.276695	0.0810631	0.502348	0.0918597	0.111671	0.258345	0.412996	0.100704	0.189636	0.157914	0.443581	0.0540569	0.247384	0.190822	0.239861	0.130517	0.544516
2.603	0.0983996	0.550642	0.145102	0.059517	0.961631	0.15063	0.264636	0.184707	0.375626	0.419416	0.535376	0.227862	0.324921	0.0480908	0.210026	0.18515	0.351259	0.0806579	0.486394	0.0362455	0.624242	0.353915	0.384965	0.136948	0.0810361	0.154841	0.39922	0.122114	0.246	0.0945163	0.296239	0.135437	0.252474	0.111696	0.921704	0.0923253	0.116713	0.216074	0.414883	0.108885	0.182403	0.095928	0.31145	0.0793406	0.227119	0.150398	0.193134	0.286809	0.387488
2.74	0.00178884	0.587369	0.2046	0.0433318	0.815363	0.209525	0.188872	0.232554	0.415647	0.47563	0.401069	0.135548	0.319261	0.0344203	0.193375	0.182409	0.480521	0.144457	0.43321	0.0475895	0.516578	0.327435	0.300797	0.270849	0.186408	0.123787	0.213935	0.11641	0.269765	0.074978	0.214615	0.139148	0.23121	0.140851	1.00325	0.185164	0.086729	0.37311	0.31722	0.106557	0.189147	0.206885	0.312522	0.148475	0.215196	0.163915	0.126178	0.269353	0.360367
2.877	0.062716	0.576092	0.236326	0.00386125	0.517938	0.151641	0.159513	0.213085	0.317007	0.521818	0.521277	0.233947	0.334296	0.0417185	0.173231	0.244119	0.440237	0.163662	0.412658	0.0422303	0.57159	0.282864	0.210311	0.294647	0.140922	0.0235367	0.256165	0.161785	0.257292	0.169437	0.511284	0.157832	0.184638	0.263599	0.813223	0.174974	0.0925517	0.348846	0.314955	0.102341	0.147199	0.175845	0.278208	0.206998	0.207433	0.26131	0.180762	0.29339	0.250415
3.014	0.109925	0.560476	0.429963	0	0.399868	0.204266	0.175126	0.297908	0.325777	0.424918	0.553089	0.165188	0.340025	0.0304079	0.166435	0.24635	0.391637	0.130205	0.367628	0.0644263	0.447557	0.369147	0.18078	0.297771	0.245367	0.00704575	0.270357	0.115783	0.3117	0.156139	0.602285	0.133648	0.201004	0.295011	0.658665	0.272176	0.0874378	0.360153	0.344634	0.115883	0.0968083	0.207396	0.268348	0.251439	0.195694	0.29367	0.157726	0.362703	0.221072
3.151	0.127269	0.623164	0.346213	0.00941757	0.33225	0.220308	0.161981	0.276283	0.231527	0.544561	0.485225	0.173005	0.307357	0.0276496	0.175083	0.221003	0.324596	0.164721	0.191041	0.0884907	0.467506	0.369844	0.261363	0.338671	0.255472	0.000439519	0.182563	0.191788	0.269685	0.173525	0.457393	0.171491	0.267373	0.350186	0.555746	0.285195	0.0800097	0.396741	0.293391	0.17833	0.102806	0.262375	0.203799	0.264988	0.232026	0.404212	0.190495	0.347193	0.226696
3.288	0.0701364	0.641154	0.275059	0.00660786	0.376679	0.184722	0.196486	0.191351	0.248987	0.462194	0.536032	0.242765	0.298073	0.0261454	0.121296	0.263268	0.190628	0.247931	0.323932	0.170216	0.340485	0.423745	0.276527	0.315239	0.190368	0.00668248	0.238545	0.0854386	0.291194	0.221669	0.491432	0.123856	0.337101	0.373481	0.257753	0.267524	0.150696	0.515501	0.266051	0.102503	0.177397	0.310324	0.224713	0.303018	0.21576	0.341737	0.182806	0.349767	0.0904206
3.425	0.0771976	0.600145	0.290741	0.0401477	0.390063	0.117236	0.0901326	0.216994	0.215209	0.576473	0.426746	0.25755	0.289373	0	0.110058	0.277399	0.154099	0.322529	0.245022	0.223643	0.42565	0.355718	0.236997	0.357995	0.203365	0.0109745	0.230078	0.13302	0.318746	0.238924	0.340917	0.19085	0.382353	0.408048	0.107494	0.260906	0.16214	0.516024	0.174189	0.113887	0.164037	0.266503	0.260307	0.386929	0.239035	0.383377	0.170312	0.437453	0.107229
3.562	0.130208	0.594757	0.203284	0.0404548	0.231305	0.150035	0.0959009	0.231646	0.198798	0.487162	0.544156	0.443709	0.393838	0.0108965	0.12144	0.294182	0.108791	0.314783	0.20507	0.198211	0.464664	0.403611	0.261661	0.345042	0.300292	0	0.221553	0.209426	0.211588	0.267186	0.387606	0.210872	0.375435	0.385891	0.11507	0.248115	0.183882	0.585121	0.34394	0.160687	0.192197	0.306142	0.250272	0.329363	0.234846	0.454233	0.152539	0.472662	0.144838
3.699	0.105405	0.564414	0.0840306	0.00829032	0.24299	0.180832	0.0810431	0.165775	0.201967	0.499066	0.487644	0.516693	0.296886	0.0180345	0.13655	0.391513	0.103201	0.407737	0.207898	0.249964	0.365518	0.406371	0.193222	0.2974	0.222547	0.0042427	0.234623	0.208304	0.231142	0.33265	0.34036	0.21377	0.291125	0.359167	0.0873598	0.351526	0.179639	0.46496	0.384917	0.174003	0.250052	0.375186	0.17798	0.359244	0.231784	0.316078	0.108008	0.440882	0.220762
3.836	0.0923966	0.530975	0.131328	0.0197269	0.194644	0.133132	0.0622419	0.16813	0.146855	0.566212	0.258726	0.492596	0.239811	0.00542677	0.118183	0.357361	0.0996274	0.366368	0.163076	0.313441	0.407235	0.491744	0.115682	0.238395	0.363681	0.057411	0.205591	0.187777	0.258474	0.326787	0.350992	0.268046	0.14512	0.367022	0.0686265	0.286139	0.158375	0.465327	0.339938	0.209555	0.133574	0.304605	0.206599	0.328946	0.180556	0.416209	0.105431	0.386934	0.280948
3.973	0.0672901	0.616547	0.140074	0.0555633	0.134563	0.118909	0.0704644	0.128019	0.143196	0.546314	0.221996	0.487101	0.299023	0.0646133	0.162085	0.432238	0.0550441	0.343758	0.255522	0.430998	0.421253	0.431297	0.119564	0.296503	0.166058	0.0533746	0.240715	0.26569	0.20013	0.291229	0.338505	0.318823	0.118721	0.358409	0.118823	0.25853	0.186176	0.446691	0.213978	0.225587	0.133561	0.355781	0.306377	0.479027	0.127577	0.450553	0.0586269	0.449134	0.180326
4.11	0.0166997	0.658742	0.21526	0.0965101	0.10693	0.151037	0.0464402	0.110988	0.110144	0.492619	0.315114	0.717922	0.289721	0.0387922	0.0729976	0.490671	0.0864409	0.358554	0.0627546	0.352177	0.365306	0.456395	0.106245	0.314148	0.188538	0.0421893	0.253912	0.314692	0.128136	0.296917	0.343803	0.278263	0.123666	0.422909	0.179522	0.267307	0.239768	0.418297	0.20869	0.255568	0.148021	0.317416	0.194472	0.386404	0.0957706	0.535246	0.0795566	0.410318	0.171706
4.247	0.0258652	0.759248	0.238844	0.139964	0.0967572	0.225616	0.0485308	0.0560628	0.156115	0.597582	0.272621	0.704843	0.304136	0.0738376	0.0764828	0.42665	0.124594	0.312334	0.13451	0.424202	0.329448	0.521185	0.104663	0.354721	0.242176	0.0401532	0.191626	0.38393	0.145658	0.316562	0.33696	0.35426	0.0955043	0.486507	0.149224	0.287563	0.292743	0.403327	0.274937	0.221028	0.133234	0.331609	0.231683	0.376121	0.0828079	0.575485	0.0515331	0.548823	0.146056
4.384	0.014683	0.72052	0.153167	0.0954796	0.0768185	0.195043	0.0713663	0.104706	0.181902	0.627648	0.196116	0.626415	0.167975	0.166327	0.123437	0.44433	0.0712246	0.375537	0.118007	0.483873	0.370149	0.718066	0.114038	0.359086	0.343367	0.0178184	0.114467	0.243299	0.190776	0.301025	0.401674	0.418508	0.109089	0.514349	0.171891	0.282474	0.276276	0.360229	0.281477	0.299433	0.0952936	0.341445	0.236405	0.409619	0.189286	0.456377	0.0412354	0.461518	0.186708
4.521	0.0144164	0.663195	0.181867	0.192625	0.0762392	0.306788	0.0454683	0.157951	0.0894788	0.765436	0.177434	0.574779	0.131324	0.172332	0.153102	0.41665	0.101483	0.348064	0.118153	0.47759	0.324225	0.703937	0.111074	0.4195	0.29077	0.0488987	0.0519177	0.341234	0.112109	0.272833	0.386633	0.34939	0.11864	0.500192	0.0730011	0.283759	0.312985	0.460492	0.375956	0.266035	0.0406849	0.336299	0.183209	0.319393	0.0494343	0.470206	0.204727	0.527247	0.160828
4.658	0.0397368	0.696855	0.144036	0.240457	0.0402602	0.173294	0.0472932	0.105386	0.16442	0.754358	0.176086	0.644159	0.157316	0.161561	0.127712	0.424191	0.0586977	0.344273	0.138147	0.505655	0.38779	0.877444	0.118992	0.442914	0.436226	0.0383188	0	0.266769	0.146696	0.255324	0.264267	0.472604	0.122583	0.485298	0.131809	0.274359	0.233223	0.327316	0.274662	0.257877	0.0639004	0.36585	0.233657	0.47863	0.0816141	0.518949	0.0446526	0.5371	0.124131
4.795	0.0604311	0.721892	0.162193	0.292332	0.0955788	0.233965	0.0651575	0.145376	0.13616	0.750343	0.1561	0.692239	0.138937	0.16787	0.0545698	0.464175	0.0603796	0.423095	0.136402	0.45703	0.377446	0.753388	0.112615	0.393077	0.456711	0.0498943	0.105007	0.307293	0.176054	0.315903	0.228012	0.42179	0.158147	0.618195	0.0715866	0.352633	0.222202	0.387683	0.158769	0.299722	0.0585822	0.344215	0.194004	0.461286	0.0997986	0.542196	0.12067	0.684129	0.0587441
4.932	0.0399489	0.674177	0.193517	0.390474	0.101544	0.260457	0.0500131	0.128782	0.145248	0.806429	0.144026	0.677063	0.178	0.179689	0.0623145	0.525046	0.136787	0.429313	0.113896	0.459627	0.399704	0.79044	0.083	0.425954	0.415528	0.0644837	0.0674089	0.342821	0.143321	0.294744	0.14868	0.420268	0.123337	0.703883	0.180177	0.320482	0.15689	0.542972	0.1279	0.290488	0.0526934	0.338971	0.134216	0.446278	0.0867553	0.493684	0.0331809	0.737128	0.0782145
5.069	0.00366436	0.705004	0.128595	0.361245	0.0598012	0.218744	0.0451467	0.179522	0.109518	0.785761	0.130868	0.547148	0.153681	0.218821	0.0974922	0.597186	0.119476	0.338937	0.0884042	0.458078	0.468119	0.784026	0.0697932	0.46674	0.468015	0.125487	0.108856	0.382688	0.133087	0.434066	0.0705694	0.359162	0.0808503	0.814324	0.0847378	0.377753	0.144135	0.496562	0.150807	0.355821	0.0855401	0.364989	0.22153	0.415857	0.0680069	0.49824	0.0533788	0.844576	0.0911696
5.206	0.0292414	0.728271	0.123715	0.431867	0.0800884	0.240459	0.13544	0.198283	0.0691318	0.846628	0.162533	0.513679	0.110915	0.292885	0.081327	0.563093	0.110878	0.393846	0	0.40988	0.372399	0.771051	0.0519534	0.415639	0.337789	0.136932	0.106085	0.385351	0.0708932	0.48223	0.0877902	0.397811	0.130467	0.821103	0.0596152	0.376413	0.0904804	0.62938	0.123707	0.414285	0.117232	0.359215	0.221056	0.438458	0.0193636	0.518845	0.0197558	0.903845	0.133409
5.343	0.0454673	0.742029	0.102572	0.496027	0.0763177	0.176198	0.0963763	0.200676	0.103103	0.802749	0.0981743	0.534852	0.0664164	0.332912	0.0618437	0.446254	0.14258	0.43705	0.204457	0.478609	0.354196	0.759481	0.076199	0.403017	0.268594	0.294442	0.122707	0.405007	0.0979826	0.494133	0.115826	0.383321	0.155973	0.865177	0.0676191	0.329074	0.0312372	0.615098	0.118601	0.360373	0.13947	0.351244	0.236002	0.48432	0.00804131	0.451215	0.0252475	0.875307	0.0936742
5.48	0.0462912	0.674657	0.0723131	0.621602	0.112483	0.114532	0.0910345	0.211155	0.11787	0.771475	0.114539	0.634296	0.0442872	0.254687	0.0848045	0.55191	0.0891449	0.467342	0.128849	0.442907	0.346153	0.673018	0.0779928	0.417158	0.245441	0.222199	0.103442	0.382957	0.129092	0.473682	0.0951343	0.448077	0.121243	0.90246	0.143787	0.346043	0.0713114	0.555389	0.122219	0.34614	0.102602	0.331642	0.143387	0.381811	0	0.410634	0.0500225	0.915323	0.077684
5.617	0.0625418	0.558543	0.0941503	0.63809	0.0994232	0.205814	0.0913492	0.141733	0.124128	0.773825	0.0541365	0.557557	0.0693542	0.309939	0.0376377	0.609114	0.0772053	0.496882	0.0724894	0.455951	0.330149	0.688261	0.0682434	0.43217	0.295887	0.315162	0.0998196	0.371625	0.118463	0.534024	0.1288	0.467526	0.131703	0.926725	0.15108	0.431361	0.111171	0.552625	0.0810181	0.460031	0.0761194	0.341186	0.159813	0.464448	0.0716174	0.581391	0.0543396	0.991668	0.104004
5.754	0.105939	0.580133	0.113122	0.692728	0.11512	0.193225	0.0955093	0.170218	0.099527	0.687493	0.0762939	0.63299	0.103217	0.406027	0.0718891	0.542798	0.0443296	0.576794	0.0633176	0.440944	0.357928	0.644976	0.0784314	0.522855	0.341024	0.327432	0.0686664	0.395787	0.103299	0.506265	0.112997	0.35809	0.111196	0.964277	0.155834	0.485005	0.0963109	0.595205	0.0853195	0.544892	0.0762825	0.361602	0.15263	0.467636	0.0552052	0.491149	0.0588706	0.906943	0.0965905
5.891	0.0603914	0.528946	0.147001	0.775265	0.112581	0.238234	0.0503627	0.231	0.12333	0.789386	0.0401616	0.587526	0.0675061	0.44008	0.0739847	0.629447	0.0527895	0.504705	0.0599904	0.490518	0.309009	0.372504	0.0570442	0.539727	0.529065	0.341762	0.0515867	0.480201	0.121107	0.653549	0.139798	0.204129	0.103885	0.929722	0.0905268	0.512019	0.0492634	0.600829	0.0936275	0.537184	0.0698163	0.391303	0.158365	0.418343	0.0476326	0.533878	0.0297481	0.739157	0.131871
6.028	0.00188047	0.468874	0.0987535	0.857142	0.136846	0.307367	0.0468807	0.265375	0.12595	0.829337	0.126015	0.769788	0.0533346	0.459357	0.0516541	0.480402	0.117903	0.482536	0.101314	0.479182	0.375482	0.597496	0.045439	0.546177	0.365623	0.310457	0.0671905	0.370614	0.129717	0.689688	0.115269	0.357415	0.100562	0.744396	0.0544541	0.529165	0.0892437	0.641754	0.0268067	0.499397	0.137215	0.422285	0.196109	0.397699	0.0599949	0.543857	0.0109687	0.711622	0.126661
6.165	0.034409	0.550344	0.134059	0.841399	0.107028	0.361823	0.114933	0.277021	0.0929865	0.789271	0.0412836	0.590706	0.0465616	0.480095	0.108866	0.439871	0.0810691	0.537797	0.0398376	0.450579	0.334371	0.533559	0.0454584	0.517761	0.226847	0.266685	0.125799	0.373869	0.0965801	0.603638	0.197584	0.478755	0.0801125	0.685978	0.0592081	0.528426	0.103555	0.568168	0.0868702	0.468855	0.210291	0.356982	0.111613	0.466532	0.051917	0.598617	0.0255225	0.664994	0.138759
6.302	0.0414769	0.519339	0.143409	0.780128	0.0931779	0.265079	0.106291	0.290668	0.0764657	0.788119	0.105665	0.661981	0.0198624	0.404695	0.0808866	0.524166	0.0372543	0.674735	0.0369342	0.653592	0.30158	0.592697	0.089932	0.614742	0.23578	0.217477	0.191062	0.403637	0.0869412	0.573178	0.179454	0.415517	0.0971972	0.622447	0.123571	0.503868	0.0779618	0.67903	0.116402	0.508002	0.260689	0.357296	0.151149	0.518335	0.0323923	0.556401	0.0312892	0.662183	0.0585212
6.439	0.0205251	0.452369	0.193946	0.792422	0.0978569	0.228715	0.100599	0.34984	0.103682	0.803841	0.12941	0.591019	0.121986	0.493918	0.0932781	0.55191	0.012853	0.623296	0.0373643	0.549676	0.289922	0.676199	0.1184	0.540332	0.15167	0.376851	0.211542	0.395471	0.192663	0.592602	0.0977587	0.369871	0.113101	0.514912	0.145153	0.446118	0.0452148	0.586661	0.132684	0.499308	0.306251	0.347624	0.227279	0.432486	0.0828079	0.574314	0	0.643386	0.109635
6.576	0.0100248	0.495617	0.197407	0.816763	0.104166	0.227912	0.0902864	0.321988	0.130627	0.852842	0.18413	0.554851	0.0773977	0.491273	0	0.572175	0.0466566	0.638959	0.0340751	0.423179	0.331843	0.606634	0.0955475	0.432236	0.0882633	0.323656	0.159108	0.385005	0.170185	0.508597	0.0946123	0.277858	0.0885756	0.574402	0.135949	0.48108	0.0289498	0.5948	0.0657999	0.457763	0.229336	0.443424	0.258047	0.469427	0.0304222	0.636202	0.111532	0.434309	0.0691922
6.713	0.0164331	0.490602	0.159166	0.737532	0.074776	0.234356	0.100103	0.22406	0.11955	0.772921	0.132704	0.570826	0.0937456	0.487479	0.0839086	0.494966	0.0775242	0.643119	0.0881259	0.502613	0.288651	0.608232	0.0600492	0.457719	0.0846393	0.343179	0.129595	0.408296	0.0813863	0.436938	0.157929	0.423476	0.18577	0.54767	0.113883	0.556978	0.0407408	0.704248	0.163306	0.557983	0.129152	0.522148	0.198687	0.551941	0.0757186	0.575102	0.0196339	0.54625	0
6.85	0.0582881	0.4831	0.101995	0.747866	0.0874777	0.230109	0.107619	0.317791	0.0668142	0.796375	0.0897879	0.513786	0.0651595	0.459505	0.0787758	0.614322	0.095807	0.605485	0.12778	0.640061	0.305517	0.625627	0.0498302	0.445592	0.0875768	0.369357	0.0756726	0.484093	0.132811	0.414871	0.0503221	0.381537	0.207845	0.452089	0.12938	0.520628	0.0458039	0.755215	0.0943757	0.487422	0.112994	0.5399	0.182833	0.556465	0.103936	0.55901	0.0834011	0.466711	0.0779396
6.987	0.117663	0.564222	0.233911	0.7794	0.0648092	0.123373	0.0558163	0.254108	0.0843164	0.769759	0.125432	0.49781	0.00382536	0.496821	0.0585864	0.657796	0.115895	0.673097	0.111682	0.706981	0.318987	0.612807	0.0914097	0.465799	0.116302	0.498055	0.10689	0.451014	0.148357	0.395173	0.0533486	0.342381	0.174871	0.480242	0.120983	0.507504	0.0372761	0.742153	0.0550862	0.535821	0.0669297	0.537016	0.207709	0.502867	0.110659	0.533343	0.0469107	0.457312	0.131469
7.124	0.138188	0.611031	0.113755	0.771055	0.120849	0.207886	0	0.225468	0.129666	0.909033	0.0801628	0.541178	0.104969	0.447402	0.0572425	0.605994	0.091037	0.641416	0.141399	0.706183	0.324276	0.630033	0.0980247	0.427377	0.0631034	0.532777	0.155353	0.381967	0.194503	0.404003	0.0382936	0.343052	0.0667982	0.477029	0.0617611	0.394233	0.044655	0.869638	0.105723	0.473189	0.06731	0.511118	0.181118	0.392225	0.092951	0.467241	0.0329365	0.449857	0.0988745
7.261	0.119488	0.614869	0.0598967	0.703597	0.184687	0.210814	0.00779597	0.172069	0.0597778	0.875117	0.137534	0.509754	0.0638183	0.424683	0.00729673	0.557674	0.0749	0.597375	0.0986198	0.710023	0.367877	0.724757	0.172053	0.494572	0.0843556	0.482044	0.143348	0.432701	0.120273	0.386998	0.0811658	0.369376	0.0676938	0.479049	0.0924381	0.455907	0.0927584	0.757831	0.117355	0.554905	0.181574	0.509096	0.231592	0.508669	0.149848	0.565004	0.00157153	0.537586	0.102464
7.398	0.0670086	0.633364	0.0378541	0.514951	0.146857	0.236308	0.0139838	0.191981	0.0333079	0.804589	0.138139	0.398391	0.126861	0.369942	0.0353903	0.666327	0.0745085	0.56551	0.0796182	0.753082	0.296292	0.736434	0.175439	0.551244	0.0785747	0.542792	0.0505741	0.44839	0.0851435	0.433006	0.171164	0.337786	0.0943971	0.511148	0.132037	0.575564	0.116938	0.786002	0.112983	0.483701	0.15266	0.507038	0.217407	0.548803	0.108375	0.604218	0.0106633	0.516483	0.192347
7.535	0.0243545	0.666824	0.088529	0.578741	0.137901	0.285917	0.0324144	0.201697	0.0822858	0.830361	0.1002	0.435884	0.179034	0.325208	0.0467795	0.716298	0.0760671	0.539032	0.071218	0.588156	0.295532	0.68053	0.154602	0.497347	0.0591407	0.503469	0.0635095	0.400352	0.0839362	0.351694	0.11002	0.428681	0.107107	0.547077	0.0808256	0.576892	0.128224	0.762898	0.0100128	0.495573	0.0787208	0.526629	0.292698	0.544773	0.0865942	0.525616	0.0428069	0.549764	0.135802
7.672	0.0470671	0.688855	0.0928903	0.659403	0.0945821	0.274385	0.0509989	0.181031	0.090742	0.772287	0.0946333	0.502748	0.137559	0.419455	0.0839086	0.684142	0.103825	0.558164	0.0831351	0.513741	0	0.452685	0.0435251	0.406878	0.0156144	0.464378	0.0810101	0.499785	0.0957091	0.448923	0.164123	0.499771	0.0905268	0.435468	0.115256	0.693407	0.157926	0.794655	0.0213943	0.538282	0.0772266	0.554524	0.301714	0.570759	0.108162	0.368611	0.0744312	0.56598	0.0840523
7.809	0.0268863	0.707353	0.092093	0.654174	0.109802	0.25893	0.0399517	0.221363	0.148416	0.753785	0.0868589	0.47564	0.0365339	0.412259	0.07053	0.629278	0.132757	0.56786	0.0675303	0.636708	0.30711	0.635842	0.0185992	0.416836	0.0554418	0.578236	0.0398423	0.560751	0.109317	0.463412	0.151919	0.427494	0.138045	0.542051	0.144463	0.677614	0.0882292	0.786715	0	0.616236	0.101223	0.521056	0.281358	0.453825	0.10732	0.538346	0.043356	0.591191	0.0993671
7.946	0.0606044	0.728705	0.0439252	0.614165	0.133826	0.308045	0.0686395	0.20867	0.118063	0.678834	0.12713	0.502301	0.0228511	0.389145	0.046658	0.650062	0.118563	0.520088	0.0962477	0.700487	0.341098	0.654763	0.064149	0.556537	0.08244	0.544227	0.041096	0.521797	0.0799583	0.577372	0.14444	0.426373	0.0981443	0.579309	0.0777758	0.549982	0.11403	0.77442	0.0428056	0.568051	0.0775798	0.479603	0.293783	0.400053	0.104991	0.581238	0.0662541	0.633396	0.090269
8.083	0.0958885	0.698411	0.0692744	0.667104	0.144166	0.288775	0.0726318	0.200109	0.0809861	0.673359	0.129374	0.544957	0.0217226	0.366098	0.0654427	0.610053	0.151794	0.566329	0.071528	0.641329	0.42283	0.628611	0.0547088	0.525811	0.100896	0.56266	0.0412426	0.46959	0.126691	0.605598	0.0586538	0.435425	0.0980107	0.608948	0.0482166	0.569825	0.0512924	0.736271	0.0394181	0.575223	0.048	0.4596	0.304422	0.45223	0.109795	0.634887	0.0559267	0.622971	0.0710141
8.22	0.053118	0.719628	0.0866747	0.644021	0.228025	0.41828	0.10678	0.184332	0.0329999	0.71024	0.095544	0.494479	0.0869786	0.411844	0.0629523	0.670887	0.088188	0.555166	0.0835653	0.73398	0.363443	0.627113	0.0281882	0.456694	0.00786129	0.41522	0.0657902	0.442361	0.140248	0.521474	0.0399091	0.481148	0.10806	0.602725	0.0985031	0.52495	0.0835416	0.844264	0.0285589	0.634493	0.0605043	0.394303	0.184287	0.416714	0.169007	0.675654	0.0558806	0.54679	0.11453
8.357	0.0191688	0.879449	0.105356	0.642309	0.296566	0.419361	0.149885	0.157414	0.0727544	0.747374	0.105519	0.464092	0.168408	0.577753	0.0270078	0.603177	0.0676652	0.618193	0.136655	0.75385	0.30188	0.614426	0.00786569	0.659861	0.0421033	0.553004	0.0836536	0.406441	0.0879397	0.471072	0.0572993	0.501686	0.082907	0.498461	0.140751	0.541883	0.113153	0.756835	0.0638285	0.670592	0.0925972	0.482118	0.159664	0.348463	0.116577	0.583561	0.0191153	0.582244	0.13779
8.494	0.00854551	0.899308	0.0930981	0.715042	0.248686	0.429283	0.131951	0.219812	0.112691	0.717624	0.103828	0.432181	0.0382946	0.495184	0.027638	0.680348	0.0854042	0.499267	0.118577	0.759425	0.348264	0.562912	0.0734079	0.667742	0.106931	0.559817	0.107798	0.384975	0.114	0.434679	0.0601918	0.524225	0.061799	0.537421	0.111323	0.645061	0.0954738	0.745992	0.057222	0.653226	0.0603753	0.427034	0.195537	0.354512	0.163089	0.678761	0.062776	0.591549	0.150098
8.631	0.0109031	0.963364	0.0860504	0.754058	0.237914	0.367751	0.115345	0.18066	0.127552	0.622513	0.133512	0.568061	0	0.423511	0.0839237	0.762849	0.0926101	0.544088	0.115945	0.734217	0.361354	0.535999	0.0475591	0.605641	0.145569	0.531643	0.083451	0.457243	0.176496	0.544073	0.0500469	0.59689	0.0681065	0.604435	0.130284	0.681435	0.119963	0.75003	0.0569352	0.653828	0.0604975	0.475005	0.190003	0.435381	0.0781281	0.712793	0.0169947	0.639324	0.194923
8.768	0.0485126	0.808164	0.108078	0.85482	0.196627	0.437791	0.0993339	0.166259	0.118799	0.614175	0.0870046	0.515412	0.0855021	0.480814	0.108859	0.780871	0.0792351	0.549822	0.130696	0.70409	0.320514	0.517763	0.0797293	0.632563	0.113306	0.479282	0.0874366	0.561241	0.129848	0.558779	0.0840724	0.478759	0.120562	0.633764	0.117712	0.663161	0.0563917	0.762603	0.0828129	0.653348	0.0377167	0.442428	0.220933	0.457249	0.0957706	0.76685	0.0646677	0.562579	0.148497
8.905	0.0517898	0.797833	0.0867105	0.819972	0.141245	0.428801	0.170581	0.14493	0.0513216	0.669702	0.139509	0.482812	0.0863243	0.523841	0.11636	0.758955	0.0871223	0.536896	0.154764	0.695999	0.34031	0.523789	0.0400483	0.745616	0.155344	0.549932	0.0897582	0.697525	0.141311	0.600311	0.067818	0.470726	0.12906	0.522453	0.0833371	0.635874	0.061702	0.806925	0.0571517	0.705959	0.0265505	0.465924	0.245881	0.476047	0.0657146	0.798129	0.0607014	0.554895	0.0995566
9.042	0.0782477	0.79264	0.0986747	0.838105	0.154305	0.392861	0.206331	0.206961	0.0308598	0.73045	0.161455	0.591351	0.116831	0.46798	0.0770218	0.782572	0.0487372	0.577304	0.161083	0.663668	0.349543	0.691546	0.0755411	0.743689	0.166077	0.650878	0.0543035	0.599188	0.196335	0.579197	0.0919596	0.541333	0.0512334	0.579669	0.098165	0.641541	0.0542955	0.75781	0.0976712	0.742021	0.05702	0.500056	0.115484	0.50462	0.100765	0.756202	0.0334246	0.733304	0.139067
9.179	0.0330915	0.832242	0.160385	0.976891	0.141019	0.34103	0.185139	0.226719	0.00525118	0.580162	0.140748	0.540443	0.0783453	0.476868	0.0531499	0.717746	0.0619454	0.484548	0.122834	0.699197	0.337848	0.654606	0.0387434	0.799548	0.163801	0.605258	0.0931407	0.667023	0.180032	0.523753	0.0752185	0.541047	0.0715182	0.628389	0.0890916	0.588744	0.0538502	0.8589	0.117702	0.789179	0.0575905	0.500764	0.0957645	0.45677	0.149848	0.754574	0.0252632	0.579188	0.173336
9.316	0.0285101	0.866448	0.077677	0.876108	0.119799	0.392949	0.191375	0.187688	0.026188	0.644811	0.119523	0.533974	0.0979638	0.54876	0.0539851	0.79237	0.0222409	0.633062	0.0780874	0.763071	0.42069	0.615952	0.0550916	0.671339	0.0928169	0.548156	0.0933123	0.657718	0.129156	0.520464	0.051726	0.557333	0.149242	0.642964	0.0587251	0.541382	0.00999271	0.875979	0.0732696	0.758888	0.0868238	0.439417	0.151889	0.382432	0.166751	0.739835	0.125201	0.698258	0.108844
9.453	0.0627796	0.87819	0.0428202	0.986721	0.13335	0.286649	0.0887552	0.228574	0.047271	0.758342	0.0327734	0.443559	0.212835	0.503685	0.0371138	0.835768	0.0265615	0.680628	0.107887	0.752844	0.392545	0.694815	0.107724	0.612811	0.0509906	0.535684	0.0790906	0.598826	0.165684	0.557736	0.0994095	0.449235	0.1196	0.625043	0.0335543	0.626129	0.0240874	0.946312	0.0424281	0.70549	0.0458197	0.420665	0.137295	0.59634	0.0705775	0.730346	0.076933	0.724604	0.0834862
9.59	0.0645437	0.772763	0.0109876	1.04746	0.176821	0.195272	0.0571658	0.192948	0.0756514	0.683643	0.0835072	0.49279	0.0863699	0.559934	0.0164309	0.847326	0	0.695647	0.0548352	0.76616	0.467498	0.766159	0.0708656	0.650994	0.0739263	0.537899	0.0789365	0.596919	0.158417	0.610892	0.0610172	0.509596	0.137612	0.713489	0.0723525	0.62928	0.0511727	0.859351	0.0544739	0.754828	0.0441896	0.320715	0.110073	0.631814	0.0742905	0.712247	0.0590534	0.699685	0.166247
9.727	0.0502214	0.826292	0.050903	1.14663	0.179418	0.222384	0.0696183	0.192356	0.0676702	0.604575	0.0958282	0.545443	0.0520975	0.609326	0.0310016	0.78485	0.0289393	0.762967	0.0680553	0.788758	0.48503	0.841045	0.163514	0.728006	0.0787061	0.58704	0.0686951	0.700921	0.11083	0.450441	0.0383924	0.576422	0.0782787	0.482623	0.112869	0.588263	0.14912	0.853529	0.11694	0.86236	0.0365824	0.426289	0.0942063	0.692259	0.156871	0.6922	0.076216	0.665989	0.110399
9.864	0.0509007	0.754485	0.0475639	0.969636	0.217342	0.200027	0.138349	0.240716	0.0454023	0.661735	0.101606	0.521263	0.0773749	0.634803	0.0544027	0.863928	0.0493461	0.767372	0.0633808	0.758324	0.368067	0.736542	0.081162	0.742037	0.0700776	0.647877	0.0559237	0.612905	0.0513054	0.657977	0.10197	0.568455	0.105217	0.459149	0.096716	0.596229	0.0570764	0.787407	0.0141188	0.826896	0.00853092	0.447891	0.138438	0.804191	0.15154	0.593889	0.0275666	0.72729	0.0602457
10.001	0.0145435	0.735081	0.0633714	0.925198	0.230868	0.186245	0.0494118	0.36267	0.0527936	0.635376	0.0677909	0.534619	0.0666428	0.527713	0.0547748	0.766639	0.00266775	0.602235	0.06803	0.636527	0.315284	0.619585	0.0968198	0.712438	0.107325	0.627592	0.0691848	0.603796	0.0576206	0.763197	0.107029	0.561711	0.0763758	0.515674	0.114663	0.601796	0.0408622	0.700016	0.0379717	0.854645	0.0493449	0.426647	0.123226	0.77678	0.165909	0.694344	0.0062244	0.591292	0.0944016
10.138	0.0507026	0.595859	0.0934431	0.971322	0.308708	0.162191	0.0220315	0.272874	0.0690274	0.661634	0.06484	0.430325	0.0784928	0.572924	0.0091266	0.774454	0.0193194	0.649501	0.119601	0.707935	0.294385	0.682204	0.0982471	0.835974	0.0789466	0.541128	0.0891052	0.583739	0.108178	0.716297	0.0949438	0.517469	0.126895	0.512395	0.120045	0.583812	0.0664103	0.723918	0.0413185	0.729939	0.0266252	0.399785	0.0959659	0.832771	0.184708	0.652031	0.0287866	0.573237	0.0930085
10.275	0.029953	0.553603	0.0981097	1.00652	0.358277	0.212042	0.0870491	0.261791	0.0728692	0.555841	0.109002	0.470339	0.0961461	0.640964	0.0502798	0.705856	0.0538552	0.674692	0.0584027	0.632993	0.311493	0.75354	0.114497	0.796288	0.0851636	0.588807	0.0434319	0.564829	0.0956239	0.633098	0.0490169	0.597942	0.143099	0.537873	0.0828265	0.557776	0.0488388	0.687114	0.0711108	0.716918	0.0269919	0.438968	0.0986552	0.723488	0.097001	0.700536	0.0999381	0.614894	0.102753
10.412	0.198199	0.475797	0.0386595	0.976185	0.22368	0.155314	0.0339457	0.325469	0.0581335	0.567891	0.10377	0.522311	0.084901	0.670345	0.0645088	0.716306	0.0722032	0.671364	0.128495	0.594378	0.329528	0.812882	0.0930532	0.898601	0.0458338	0.497351	0.0876263	0.469881	0.0971371	0.719509	0.0185824	0.659981	0.16428	0.544904	0.139275	0.628525	0.0229566	0.561831	0.0989289	0.78224	0.0421995	0.49249	0.0553125	0.699748	0.110132	0.778431	0.137894	0.606794	0.101263
10.549	0.221008	0.524343	0.047736	1.04428	0.17306	0.142147	0.0252617	0.321759	0.0834342	0.671753	0.0825527	0.580634	0.0915791	0.499548	0.0572121	0.71079	0.0731964	0.750393	0.212731	0.593338	0.311244	0.721091	0.065316	0.904596	0.0410814	0.558413	0.0789795	0.481439	0.115769	0.733368	0.0801569	0.673124	0.141272	0.517186	0.123681	0.651201	0.0346158	0.413082	0.0861402	0.638431	0	0.425982	0.0597883	0.795012	0.0876341	0.807134	0.0968411	0.539957	0.0841682
10.686	0.314423	0.515682	0.0946422	0.848128	0.133728	0.222159	0.041392	0.330279	0.118167	0.65526	0.127013	0.548956	0.0996295	0.648895	0.020364	0.72679	0.109081	0.726753	0.199947	0.631608	0.331486	0.71128	0.0586978	0.897987	0.0848973	0.647801	0.0803874	0.39545	0.182272	0.678317	0.165774	0.679581	0.0677147	0.487753	0.0204582	0.657812	0.00270078	0.647277	0.124728	0.507056	0.0396253	0.333164	0.0933034	0.843857	0.0517558	0.78036	0.0866355	0.638616	0.0729927
10.823	0.313905	0.466546	0.0603253	0.73709	0.163113	0.187518	0.0187593	0.365917	0.126545	0.736723	0.114809	0.582909	0.14742	0.636018	0.0496876	0.874151	0.134743	0.737591	0.183412	0.600652	0.362939	0.857758	0.0979829	0.982222	0.0886004	0.546241	0.115014	0.464722	0.0939752	0.618323	0.179489	0.611421	0.0646708	0.470921	0.0649282	0.703697	0.0530528	0.667778	0.0634746	0.54143	0.0871295	0.397409	0.0675043	0.873206	0.10015	0.698979	0.0120059	0.520763	0.107596
10.96	0.454154	0.484895	0.0851964	0.658385	0.146837	0.192826	0.0140537	0.34418	0.178441	0.820035	0.0926514	0.61099	0.131589	0.813687	0.0981603	0.801191	0.114742	0.64824	0.21261	0.533029	0.409507	0.838985	0.0853494	0.900222	0.065569	0.535585	0.0784453	0.492579	0.0776681	0.679692	0.169464	0.624499	0.0878683	0.436615	0.108736	0.697769	0.0660813	0.683916	0.00907718	0.579129	0.080283	0.440629	0.100525	0.930281	0.163367	0.711674	0.00218155	0.618941	0.0920887
11.097	0.452559	0.619407	0.0979725	0.676286	0.167542	0.195305	0.0725759	0.382932	0.221066	0.793314	0.00645558	0.640705	0.0667067	0.774684	0.0506898	0.728411	0.109769	0.610254	0.188928	0.646775	0.381501	0.777272	0.0722069	0.865396	0.0130888	0.459553	0.0842506	0.559326	0.0829378	0.784568	0.0516836	0.631009	0.0777452	0.466234	0.0885328	0.723122	0.127817	0.638252	0.0769534	0.519552	0.188937	0.484224	0.114717	0.983508	0.0995716	0.782218	0.0191301	0.516239	0.13887
11.234	0.397658	0.568999	0.0846248	0.649076	0.199745	0.215199	0.0314076	0.36503	0.135158	0.773343	0.0539179	0.675195	0.120722	0.769675	0.0366279	0.778374	0.066817	0.604846	0.236818	0.66841	0.388155	0.697988	0.0373192	0.757535	0.122852	0.57246	0.116996	0.562223	0.106687	0.867325	0.043493	0.595303	0.130294	0.488838	0.148527	0.717351	0.0995129	0.583665	0.11662	0.507862	0.190553	0.484826	0.069453	1.02729	0.142876	0.749197	0.0210375	0.56027	0.247579
11.371	0.41167	0.549239	0.121344	0.604193	0.240388	0.276403	0.0240172	0.438411	0.195019	0.683624	0.0973947	0.674076	0.176115	0.917772	0.113665	0.860079	0.0711738	0.570459	0.232143	0.599543	0.442568	0.551066	0.036876	0.891192	0.139475	0.66279	0.102077	0.526831	0.0814931	0.661483	0.103903	0.592438	0.0677726	0.555636	0.142021	0.661464	0.0819415	0.547782	0.112563	0.503129	0.119148	0.492834	0.067446	0.97116	0.146662	0.679377	0.0336379	0.620966	0.195918
11.508	0.354468	0.512168	0.0906934	0.643478	0.289726	0.227155	0.0330088	0.489226	0.208043	0.632279	0.068228	0.636365	0.138851	0.99513	0.121691	0.939313	0.0865641	0.639551	0.190117	0.555384	0.476629	0.551835	0.0778859	0.889527	0.0578334	0.68812	0.121829	0.496227	0.0534346	0.698706	0.0731797	0.632139	0.0934364	0.598369	0.0905268	0.7414	0.107541	0.558017	0.0550009	0.531306	0.123569	0.508312	0.0582876	1.00111	0.165623	0.84204	0.0678405	0.63218	0.139778
11.645	0.310664	0.625492	0.0410731	0.645669	0.304407	0.261489	0.0340226	0.540729	0.147534	0.704825	0.0715651	0.669415	0.140359	0.954701	0.0807575	0.914282	0.032448	0.656015	0.16732	0.480663	0.56148	0.53007	0.108437	0.969304	0.0432766	0.723434	0.160767	0.577783	0.043881	0.594472	0.0755995	0.580981	0.0710081	0.448491	0.114732	0.775373	0.0556683	0.580902	0.0399938	0.632786	0.124962	0.461775	0.0499023	1.03482	0.159566	0.68567	0.0939886	0.656567	0.0664721
11.782	0.330683	0.614819	0.0846321	0.517378	0.432356	0.228998	0.0140397	0.592386	0.192054	0.737485	0.061277	0.73112	0.059771	0.865943	0.0943335	0.866248	0.0581758	0.698212	0.107634	0.500904	0.629107	0.476753	0.05953	0.91944	0.0692962	0.674432	0.157045	0.556689	0.102369	0.803869	0.0274574	0.584594	0.0362254	0.54328	0.0822193	0.766315	0.0886193	0.601145	0.0976597	0.67088	0.0818384	0.471246	0.0619636	1.0801	0.0896408	0.736728	0.0715631	0.612076	0.124889
11.919	0.228293	0.625979	0.0544833	0.638986	0.591718	0.30371	0.0329808	0.531855	0.196877	0.759691	0.0508796	0.698806	0.188731	0.98171	0.176071	0.778344	0.0717393	0.719282	0.121417	0.476563	0.632357	0.540702	0.0518798	0.859688	0.0876476	0.789802	0.152139	0.575948	0.116776	0.766057	0.0452496	0.615726	0.0875175	0.559251	0.0544955	0.77447	0.103945	0.560764	0.14997	0.571912	0.0962445	0.459877	0.0765781	1.08998	0.124215	0.67953	0.0513957	0.577218	0.139015
12.056	0.238852	0.628296	0.0992479	0.701393	0.518523	0.313998	0.025073	0.549803	0.266364	0.709818	0.067055	0.702529	0.190927	0.850905	0.0533853	0.793847	0.0570014	0.814196	0.147111	0.489361	0.562758	0.521361	0.142599	0.901623	0.0863128	0.570486	0.189758	0.521075	0.059631	0.656925	0.0986829	0.708426	0	0.641068	0.128966	0.704396	0.0696286	0.479584	0.126893	0.550914	0.0394012	0.509505	0.0587487	1.03943	0.149848	0.653068	0.0617387	0.546545	0.203691
12.193	0.186492	0.759809	0.170862	0.721372	0.45551	0.294737	0.0277229	0.507725	0.251874	0.689163	0.086174	0.719738	0.157062	0.732504	0.0619121	0.899242	0.0255104	0.966553	0.133966	0.536895	0.58983	0.422391	0.145802	0.86116	0.0717427	0.624085	0.0811189	0.621102	0.0755086	0.850086	0.115142	0.695953	0.0335162	0.515351	0.157435	0.759841	0.0608821	0.536458	0.118396	0.597267	0.0743671	0.488728	0.062055	0.848057	0.210465	0.782173	0.100197	0.555513	0.192485
12.33	0.238097	0.687668	0.141427	0.665283	0.417926	0.329981	0.0546836	0.514611	0.213231	0.813492	0.0665304	0.803005	0.156353	0.938428	0.0761183	0.945591	0.0784521	1.01022	0.141709	0.576398	0.455256	0.462384	0.102891	0.837082	0.0664786	0.635683	0.080636	0.671797	0.103593	0.869604	0.118528	0.767931	0.116584	0.587599	0.196972	0.77547	0.0997471	0.51429	0.0543623	0.722553	0.0798959	0.535619	0.105767	1.01133	0.166751	0.640595	0.10598	0.545177	0.108067
12.467	0.222286	0.699175	0.163783	0.757368	0.44327	0.375726	0.0485517	0.394161	0.217689	0.76684	0.0424494	0.784945	0.166659	1.06501	0.0614413	0.867397	0.060974	1.10009	0.183868	0.536239	0.476512	0.498254	0.102621	0.699387	0.03627	0.577523	0.148099	0.636257	0.0873365	0.804221	0.102577	0.71546	0.0823783	0.560278	0.0885811	0.736294	0.136056	0.470901	0.0951984	0.729562	0.0392246	0.450224	0	1.04238	0.227295	0.658643	0.0227918	0.512612	0.161139
12.604	0.309821	0.747335	0.226756	0.589787	0.403638	0.451282	0.0531944	0.328161	0.188087	0.68222	0.13556	0.640017	0.0880227	0.768964	0.0821546	0.833974	0.0674187	1.02156	0.159616	0.59799	0.51576	0.579529	0.106697	0.71105	0.0584891	0.660161	0.157765	0.587967	0.0764226	0.783075	0.112278	0.701113	0.0432659	0.562473	0.0877324	0.761017	0.0517566	0.495334	0.063045	0.626043	0.0241528	0.473253	0.0321513	0.88882	0.359984	0.454233	0.0685731	0.465405	0.175373
12.741	0.238201	0.869565	0.193554	0.583869	0.576944	0.451727	0.0667237	0.319579	0.152378	0.718037	0.193398	0.582928	0.0511963	0.798403	0.0883428	0.916778	0.154403	0.995042	0.0694532	0.633303	0.55102	0.531612	0.063643	0.716502	0.0200864	0.497665	0.079572	0.549901	0.0939154	0.942098	0.207038	0.661466	0.0715142	0.51709	0.126675	0.839336	0.0997308	0.49938	0.095994	0.697502	0.106996	0.527615	0.0540654	0.891723	0.305848	0.593789	0.0616012	0.585637	0.0971351
12.878	0.278808	0.747687	0	0.516011	0.673839	0.396718	0.010397	0.301272	0.203047	0.725508	0.213566	0.504611	0.119846	0.502353	0.072375	0.881448	0.116845	0.954767	0.0959821	0.638395	0.540304	0.56999	0.0613874	0.653084	0	0.489628	0.0778581	0.491482	0.0514584	0.808268	0.332289	0.76465	0.0907747	0.597768	0.105458	0.75169	0.096521	0.674187	0.16643	0.676393	0.231666	0.555659	0.0387632	0.795425	0.336673	0.582669	0.0372082	0.692883	0.128926
13.015	0.303608	0.704556	0.0907519	0.647356	0.890404	0.353615	0.0297016	0.19404	0.229392	0.762036	0.163102	0.530932	0.214683	0.656252	0.109504	0.908181	0.123652	0.905065	0.168282	0.592424	0.480077	0.527594	0.02453	0.647279	0.0940002	0.615797	0.160991	0.487352	0.0363371	0.755251	0.292648	0.644075	0.0800932	0.603661	0.233044	0.653726	0.062676	0.662618	0.154798	0.584981	0.44462	0.576269	0.0710704	0.923453	0.38963	0.508301	0.0388711	0.532272	0.221134
13.152	0.204821	0.789818	0.0939262	0.790542	1.00658	0.398881	0.090615	0.235618	0.231031	0.833522	0.127887	0.560702	0.257378	0.657073	0.0987905	0.810277	0.0970684	0.869619	0.249956	0.623474	0.484343	0.519318	0.0581523	0.654449	0.0607401	0.609967	0.107501	0.549756	0.0512416	0.759007	0.450909	0.559764	0.1183	0.567653	0.257498	0.62574	0.0870967	0.52172	0.0674399	0.702892	0.332237	0.60782	0.109671	0.886901	0.557157	0.539286	0.127154	0.488726	0.24721
13.289	0.15887	0.791162	0.101788	0.94447	1.18155	0.36909	0.0520057	0.186762	0.228468	0.755932	0.0835582	0.584056	0.217639	0.535371	0.0670069	0.776332	0.100461	0.809062	0.224648	0.622607	0.563635	0.530919	0.0585421	0.587678	0.0483552	0.504742	0.0948025	0.643488	0.0592868	0.728425	0.412446	0.538993	0.117646	0.551781	0.11912	0.694787	0.0980824	0.5519	0.0759839	0.591506	0.229201	0.551374	0.146817	0.936481	0.596463	0.506424	0.0515331	0.674458	0.2748
13.426	0.199681	0.752005	0.125418	0.853062	1.69191	0.316128	0.0600674	0.20827	0.283584	0.723034	0.203985	0.558435	0.158975	0.520833	0.0597937	0.744466	0.117091	0.8549	0.188352	0.53063	0.513605	0.468709	0.0879073	0.576881	0.0835742	0.458454	0.0880586	0.616639	0.0978766	0.705666	0.440292	0.503965	0.109021	0.551819	0.0954396	0.686548	0.163426	0.599373	0.144464	0.647802	0.109761	0.531903	0.235515	0.887677	0.702428	0.501403	0.0863301	0.638375	0.303703
13.563	0.125192	0.73222	0.117433	0.979928	2.17587	0.323783	0.176231	0.216907	0.23801	0.818489	0.228073	0.596755	0.138712	0.496778	0.0729597	0.699477	0.15096	0.832946	0.321743	0.672733	0.460106	0.524746	0.0985214	0.772533	0.111182	0.589776	0.0361023	0.596172	0.0524146	0.744514	0.505387	0.300778	0.108353	0.560071	0.0731529	0.766138	0.113856	0.586906	0.140906	0.681673	0.0764862	0.537936	0.141809	0.864185	0.710791	0.542731	0.0673984	0.57417	0.263269
13.7	0.140581	0.71311	0.154951	1.00752	2.47982	0.285555	0.19592	0.176158	0.236653	0.741275	0.167583	0.597574	0.167566	0.584614	0.0818053	0.612419	0.195768	0.72246	0.269002	0.607168	0.353568	0.478704	0.079579	0.742536	0.061593	0.643043	0.110059	0.600251	0	0.562175	0.377525	0.407873	0.160368	0.560469	0.104547	0.790929	0.0656265	0.516244	0.1502	0.615871	0.0754199	0.500885	0.114822	0.942703	0.554616	0.62448	0.0866355	0.510225	0.252176
13.837	0.225894	0.692675	0.0923333	0.868213	2.39528	0.271768	0.204702	0.188267	0.381994	0.80101	0.207001	0.586145	0.17621	0.550581	0.143026	0.686264	0.0906093	0.761573	0.297662	0.690084	0.504533	0.412408	0.0739774	0.656702	0.0728212	0.775239	0.0783357	0.614249	0.113525	0.532215	0.379366	0.392688	0.159726	0.607702	0.0740153	0.802103	0.0306137	0.407129	0.115027	0.504717	0.12304	0.457705	0.0812614	0.916196	0.412919	0.511884	0.127825	0.638375	0.195993
13.974	0.11172	0.602747	0.143132	0.804435	2.03953	0.277297	0.164079	0.20053	0.285338	0.698135	0.24784	0.551302	0.236778	0.46235	0.13251	0.622466	0.10613	0.721688	0.321098	0.721121	0.523094	0.44964	0.0668696	0.808813	0.161576	0.732938	0.082811	0.552281	0.114519	0.638999	0.444313	0.348106	0.124482	0.534676	0.0516665	0.871832	0.107972	0.399977	0.205016	0.51054	0.0588674	0.523144	0.079163	0.953353	0.497155	0.479212	0.124103	0.610591	0.223697
14.111	0.183939	0.52278	0.108223	0.733414	1.84515	0.247328	0.149116	0.177763	0.214124	0.799495	0.210287	0.530837	0.0920251	0.548479	0.129693	0.800551	0.0948574	0.672552	0.234863	0.705617	0.436972	0.498454	0.157796	0.915075	0.0365945	0.683945	0.0664839	0.608029	0.114532	0.669057	0.58627	0.370943	0.114157	0.462333	0.0685161	0.840038	0.0645914	0.518952	0.204916	0.537439	0.0898871	0.513045	0.0759288	0.961058	0.356527	0.49901	0.118336	0.597173	0.150771
14.248	0.160327	0.563536	0.161064	0.690755	1.84349	0.178927	0.168022	0.189642	0.273844	0.74134	0.202119	0.517204	0.111656	0.50179	0.225538	0.746694	0.171657	0.704992	0.208689	0.700198	0.444394	0.519398	0.196324	0.782262	0.038798	0.744495	0.0589254	0.574647	0.192501	0.782277	0.708855	0.368308	0.134457	0.460536	0.0813499	0.795332	0.0923183	0.558751	0.135369	0.483302	0.105006	0.539958	0.117452	0.982273	0.144216	0.218232	0.137894	0.666556	0.23053
14.385	0.173743	0.575492	0.0256293	0.678166	1.73239	0.174214	0.17063	0.159752	0.305487	0.717918	0.259877	0.519487	0.153821	0.44796	0.0151857	0.79202	0.1386	0.524321	0.252106	0.702558	0.387834	0.398166	0.102262	0.739024	0.0498298	0.735055	0.0967341	0.615197	0.107736	0.660759	0.649742	0.277973	0.18496	0.439555	0.130615	0.873779	0.0595317	0.464568	0.0963161	0.50079	0.0865318	0.575199	0.154085	0.964331	0.387374	0.470894	0.148816	0.68533	0.231608
14.522	0.204847	0.497568	0.104838	0.674351	1.60838	0.192493	0.159688	0.0901007	0.35198	0.682248	0.297838	0.458347	0.182294	0.511484	0.0424668	0.645961	0.315338	0.650483	0.344122	0.700746	0.357885	0.466237	0.114756	0.720558	0.117602	0.634746	0.105207	0.512069	0.0512122	0.5909	0.587074	0.291947	0.205043	0.594518	0.0334025	0.846203	0.0900421	0.423145	0.0496738	0.525586	0.0975147	0.571805	0.139633	1.03316	0.381457	0.462309	0.128252	0.626139	0.196896
14.659	0.167095	0.335679	0.109839	0.690129	1.68281	0.190292	0.352126	0.149344	0.378194	0.768304	0.283302	0.457168	0.195581	0.468757	0.0046696	0.722361	0.375058	0.673826	0.263119	0.526863	0.376029	0.499171	0.13292	0.704256	0.273245	0.744078	0.107396	0.581473	0.0121673	0.583404	0.439763	0.287004	0.350459	0.638223	0.0573245	0.903181	0.105864	0.432511	0.0605993	0.501466	0.107703	0.634612	0.104552	0.910745	0.334769	0.524301	0.0975277	0.682796	0.175523
14.796	0.091884	0.386007	0.105027	0.556987	1.7189	0.175016	0.246374	0.13265	0.391134	0.762265	0.294399	0.492925	0.0180409	0.268791	0.0378655	0.596828	0.424484	0.726243	0.365009	0.471895	0.403692	0.43993	0.0891656	0.718654	0.141146	0.648514	0.122318	0.575129	0.0488447	0.520402	0.285029	0.290413	0.223714	0.519889	0.0543368	0.942296	0.0866179	0.431389	0.146551	0.546122	0.0943156	0.707029	0.116653	0.818439	0.235197	0.521417	0.0121887	0.64117	0.163963
14.933	0.149084	0.490275	0.0871813	0.543574	1.51592	0.151949	0.415242	0.153454	0.404638	0.735369	0.395277	0.425186	0.215967	0.374181	0.0438867	0.637779	0.506365	0.755668	0.526004	0.528632	0.436906	0.533183	0.110674	0.738388	0.075048	0.607993	0.164222	0.732729	0.0892872	0.606031	0.268422	0.238723	0.231152	0.542258	0.113076	0.887979	0.0974623	0.490068	0.145035	0.56388	0.0687907	0.690113	0.194329	0.871121	0.349226	0.504235	0.0485736	0.611629	0.168768
15.07	0.174629	0.515196	0.125887	0.553466	1.34192	0.168269	0.322159	0.13047	0.681061	0.730184	0.282071	0.488098	0.233398	0.453539	0.0508189	0.697973	0.229021	0.744847	0.537883	0.537827	0.401377	0.585614	0.0172338	0.718852	0.0710762	0.654878	0.114352	0.634686	0.0341058	0.636425	0.286454	0.242004	0.143364	0.49213	0.134603	1.11089	0.108178	0.501186	0.131504	0.569551	0.0468997	0.645459	0.139335	0.673762	0.3997	0.564157	0.0122504	0.597228	0.212116
15.207	0.155811	0.472047	0.175395	0.504048	1.14375	0.168252	0.219434	0.144171	0.891583	0.602652	0.269138	0.460579	0.146397	0.410891	0.0599379	0.705961	0.211912	0.730514	0.472465	0.547799	0.455073	0.519975	0.0190842	0.83471	0.0454544	0.720672	0.114302	0.599743	0.06672	0.741339	0.16878	0.244451	0.12779	0.519546	0.151356	0.975636	0.0586877	0.581353	0.13523	0.54818	0.0707876	0.639937	0.141367	0.853245	0.312571	0.504845	0.0654761	0.695716	0.110903
15.344	0.147376	0.504942	0.19324	0.563292	1.04656	0.311685	0.236571	0.118741	1.02781	0.504656	0.341344	0.455147	0.164535	0.420545	0.0484348	0.675485	0.167713	0.682558	0.551249	0.46443	0.394452	0.452685	0.212188	0.932437	0.0670428	0.523552	0.113536	0.612709	0.107621	0.725074	0.159354	0.353679	0.0880051	0.556775	0.148576	0.90219	0.0802182	0.553157	0.0705141	0.544862	0.0846911	0.663536	0.216874	0.875116	0.304207	0.525561	0.0412354	0.61311	0.113772
15.481	0.167132	0.556364	0.205001	0.513344	0.986283	0.195426	0.276236	0.102034	1.10913	0.377913	0.414432	0.402244	0.249218	0.425976	0.0664754	0.675561	0.194173	0.639838	0.552482	0.39952	0.438229	0.438864	0.208379	0.851873	0.0728387	0.75355	0.0694697	0.569177	0.0808811	0.699525	0.329235	0.354612	0.0965173	0.636269	0.163825	1.07194	0.123896	0.540251	0.0607793	0.582742	0.0247573	0.600156	0.192108	0.946181	0.277908	0.492621	0.0293513	0.77477	0.210359
15.618	0.229708	0.555174	0.170946	0.434697	1.114	0.156995	0.446097	0.0841985	1.26134	0.337081	0.371371	0.397884	0.256947	0.525709	0.156375	0.851043	0.335426	0.613638	0.57822	0.344936	0.427257	0.428392	0.216507	0.712919	0.0713766	0.758223	0.0652786	0.570688	0.0501962	0.742222	0.214671	0.316303	0.104068	0.631524	0.236605	1.15016	0.055999	0.486478	0.0544259	0.587176	0.0213748	0.516144	0.2507	0.856908	0.278223	0.555401	0.0630814	0.691822	0.22782
15.755	0.263147	0.418244	0.104209	0.367559	1.19168	0.133632	0.750266	0.119566	1.33404	0.308694	0.328571	0.434744	0.247411	0.543634	0.149594	0.85877	0.268703	0.541193	0.601517	0.390692	0.427462	0.451768	0.244775	0.566936	0.104629	0.827896	0.113637	0.48821	0.0211432	0.691255	0.425032	0.195401	0.106166	0.67927	0.379571	0.890535	0.0361333	0.452961	0.0605026	0.594366	0.0110508	0.739887	0.153358	0.95001	0.26039	0.517317	0.116597	0.702592	0.180027
15.892	0.182995	0.391885	0.134458	0.392224	1.26921	0.162449	1.13338	0.0282107	1.25696	0.347365	0.465064	0.409286	0.362439	0.552956	0.131857	0.885911	0.222699	0.557885	0.6777	0.379758	0.515015	0.528287	0.373285	0.583698	0.078107	0.802606	0.0405217	0.38809	0.0383858	0.770296	0.340198	0.239983	0.152554	0.73076	0.367406	0.912613	0.0391527	0.585155	0.0538001	0.652003	0.0581339	0.743902	0.156092	0.947285	0.191256	0.442083	0.11495	0.671415	0.166162
16.029	0.188271	0.455084	0.202522	0.442824	1.16289	0.0957786	1.35223	0.0328374	1.30974	0.354147	0.430965	0.43266	0.25952	0.641507	0.0214118	0.803043	0.283738	0.48315	0.700535	0.472758	0.572707	0.553546	0.372222	0.497466	0.0949704	0.756398	0.0930833	0.456377	0.0755684	0.631601	0.412439	0.197749	0.17332	0.609917	0.293591	0.784448	0.105449	0.580518	0.0511365	0.673411	0.14889	0.730781	0.229416	0.93264	0.300297	0.47328	0.133806	0.6645	0.166576
16.166	0.254225	0.460721	0.207289	0.519889	1.40888	0.0757892	0.982369	0.0896505	1.11159	0.374013	0.453268	0.388259	0.347335	0.676506	0.0621626	1.04072	0.212224	0.477926	0.753023	0.51598	0.487959	0.5341	0.447173	0.518587	0.11025	0.745675	0.12624	0.465951	0.0500264	0.718715	0.48133	0.234839	0.164041	0.607669	0.321626	0.730363	0.109618	0.509447	0.0868709	0.601346	0.166061	0.636583	0.141367	0.922214	0.256179	0.430826	0.0759566	0.584292	0.205568
16.303	0.264601	0.440545	0.117074	0.402066	1.53873	0.0393381	0.477756	0.0952651	1.05366	0.318432	0.532228	0.351434	0.374952	0.542896	0.0804386	0.910479	0.212905	0.494498	0.748254	0.540692	0.55755	0.499131	0.462396	0.492964	0.0814164	0.705221	0.118017	0.436273	0.131111	0.86604	0.402196	0.123488	0.108538	0.597276	0.377025	0.559928	0.0619638	0.496241	0.0400723	0.614947	0.171807	0.62497	0.123304	0.903461	0.295441	0.333114	0.045629	0.536995	0.125382
16.44	0.228128	0.466649	0.122349	0.392123	1.54838	0.050429	0.290443	0.0904175	1.0355	0.3074	0.56624	0.38378	0.429486	0.576882	0.0308497	0.821557	0.197486	0.506365	0.665644	0.41782	0.518485	0.5418	0.422877	0.421894	0.049338	0.72055	0.339901	0.397425	0.105186	0.822958	0.36101	0.198834	0.0458255	0.540229	0.36001	0.71341	0.0893367	0.600968	0.117691	0.760895	0.160118	0.61528	0.142205	1.01311	0.348149	0.456377	0.0324483	0.508647	0.152894
16.577	0.171832	0.475477	0.179601	0.451741	1.30238	0.0546848	0.236564	0.0888627	0.992702	0.382792	0.858556	0.396183	0.453144	0.570276	0.114925	0.910404	0.178819	0.474276	0.644264	0.557011	0.673563	0.493703	0.63581	0.483669	0.104029	0.751541	0.198432	0.397007	0.152204	0.771958	0.511037	0.190257	0.150053	0.646161	0.349653	0.611926	0.09044	0.673596	0.0809667	0.694764	0.133051	0.55594	0.248109	0.835898	0.308719	0.440645	0.0816624	0.502545	0.213251
16.714	0.213292	0.457416	0.262066	0.417902	0.977185	0.045075	0.250282	0.0815266	0.954644	0.305624	1.08475	0.292962	0.411484	0.607232	0.0762777	0.895894	0.312511	0.544997	0.787396	0.486302	0.775404	0.561017	0.485894	0.565421	0.118471	0.751783	0.197825	0.496325	0.183976	0.921283	0.555525	0.14804	0.10611	0.601934	0.318072	0.676177	0.0841333	0.632628	0.173349	0.613543	0.235001	0.584871	0.176006	0.805947	0.362371	0.349846	0.13112	0.477948	0.15785
16.851	0.160715	0.512878	0.23275	0.369056	0.60926	0.0126177	0.228544	0.0644994	1.0549	0.3084	1.08758	0.257763	0.47581	0.486299	0.0861409	0.875052	0.296454	0.52843	0.77508	0.491558	0.689567	0.514931	0.536705	0.432484	0.156578	0.673562	0.192904	0.484681	0.116062	0.841113	0.652289	0.19412	0.166442	0.54846	0.418818	0.479454	0.0577765	0.573814	0.263374	0.661787	0.193019	0.454289	0.19959	0.787017	0.234846	0.377211	0.0961241	0.489426	0.111963
16.988	0.114308	0.559652	0.197582	0.3657	0.354997	0	0.270566	0.0254179	1.04027	0.383943	0.932117	0.247631	0.527735	0.589123	0.149579	0.791595	0.293409	0.537402	0.747881	0.51611	0.727705	0.437642	0.328388	0.458651	0.0825423	0.636993	0.264143	0.344972	0.215855	0.914561	0.597494	0.16893	0.0978997	0.494561	0.442664	0.540165	0.0798125	0.723221	0.383198	0.721038	0.322993	0.409114	0.267224	0.633802	0.336321	0.382332	0.0841947	0.474271	0.185116
17.125	0.117958	0.582969	0.220109	0.371651	0.229842	0.0876122	0.389784	0.0784129	1.0711	0.280082	0.773016	0.182821	0.413296	0.447605	0.135168	0.70986	0.297853	0.570893	0.735179	0.508433	0.768049	0.46417	0.383051	0.560318	0.0901981	0.626368	0.410195	0.335572	0.212498	0.978172	0.678759	0.139831	0.146256	0.461749	0.447984	0.575548	0.0606599	0.652572	0.349763	0.621372	0.314598	0.409227	0.304169	0.704392	0.576887	0.385521	0.0594658	0.405393	0.176743
17.262	0.129583	0.678755	0.2244	0.381691	0.19836	0.135158	0.476701	0.0860575	0.969776	0.32269	0.8641	0.171225	0.386275	0.470625	0.103202	0.690095	0.259584	0.511648	0.852567	0.501797	0.771095	0.407865	0.328816	0.429144	0.0867879	0.836942	0.334256	0.407098	0.164167	0.920453	0.60965	0.133959	0.159019	0.446118	0.344243	0.668937	0.0788988	0.60093	0.459466	0.881728	0.368385	0.381197	0.274161	0.670369	0.704193	0.318114	0.0854147	0.409346	0.222901
17.399	0.110089	0.650519	0.185942	0.237143	0.328666	0.159678	0.517561	0.060923	0.890831	0.390349	0.68674	0.10463	0.476084	0.473137	0.0854727	0.692685	0.205924	0.478162	0.979284	0.363313	0.818692	0.30027	0.288681	0.503231	0.0682411	0.765305	0.243804	0.411791	0.175965	0.904257	0.559384	0.141562	0.2611	0.351465	0.442464	0.612765	0.0666695	0.632438	0.510216	0.795135	0.317437	0.311189	0.226733	0.627224	0.723044	0.230125	0.0908463	0.359562	0.25836
17.536	0.125766	0.646602	0.210743	0.292639	0.400776	0.195147	0.518114	0.0286567	0.950098	0.317	0.441836	0.108689	0.46534	0.39792	0.173686	0.755839	0.229593	0.403238	0.899173	0.43016	0.769225	0.29465	0.44815	0.456879	0.135481	0.777665	0.251821	0.294895	0.184984	0.809557	0.434337	0.172109	0.344278	0.261752	0.561501	0.61689	0.0762678	0.700341	0.64333	0.699249	0.27913	0.27516	0.17159	0.534597	0.753202	0.400343	0.0802893	0.4965	0.303163
17.673	0.148154	0.683787	0.233727	0.251536	0.451494	0.219601	0.588333	0.0165813	0.980842	0.441971	0.626286	0.134211	0.448517	0.474368	0.164347	0.722062	0.22022	0.423061	0.933418	0.487886	0.782746	0.303479	0.291624	0.508082	0.0967246	0.771956	0.242987	0.270114	0.196513	0.8432	0.468941	0.263745	0.361263	0.233918	0.61047	0.674881	0.106192	0.655606	0.551853	0.71704	0.428434	0.280014	0.197531	0.624005	0.702992	0.378883	0.234171	0.415192	0.377297
17.81	0.0886233	0.588513	0.198855	0.197693	0.438807	0.151196	0.700295	0.0262224	1.05995	0.460565	0.77934	0.0581999	0.44246	0.454544	0.171287	0.708723	0.305414	0.494223	0.662956	0.538621	0.876552	0.240784	0.279369	0.498539	0.10284	0.765637	0.26357	0.317798	0.299621	0.739047	0.32685	0.243363	0.362717	0.222962	0.812396	0.569664	0.0977827	0.707585	0.366103	0.750427	0.431939	0.361573	0.249174	0.668501	0.601025	0.354815	0.362453	0.439956	0.381794
17.947	0.0755178	0.574422	0.210699	0.191628	0.415167	0.176572	0.486916	0.123963	1.0898	0.356621	0.766742	0	0.380509	0.457232	0.15557	0.778748	0.391818	0.555569	0.523233	0.567794	0.902681	0.21692	0.181418	0.567338	0.0854881	0.719595	0.480107	0.311035	0.394668	0.745304	0.213514	0.292635	0.413175	0.217364	1.02176	0.516526	0.101435	0.639383	0.328332	0.689705	0.41826	0.280393	0.272362	0.551034	0.455154	0.367251	0.480012	0.449075	0.382059
18.084	0.146277	0.636708	0.140401	0.214371	0.377494	0.103595	0.293282	0.0903591	1.02176	0.292871	0.608449	0.0451246	0.180843	0.41506	0.168933	0.664617	0.436054	0.508277	0.434728	0.511851	0.929591	0.229327	0.179108	0.491285	0.128097	0.77871	0.426813	0.246097	0.451498	0.704341	0.194854	0.390085	0.408353	0.291441	0.697505	0.572971	0.134038	0.568232	0.284764	0.603655	0.284937	0.127228	0.236106	0.575549	0.315193	0.363177	0.278488	0.447913	0.414007
18.221	0.147738	0.567986	0.168206	0.267612	0.293556	0.0830694	0.184285	0.168109	1.37572	0.288291	0.409762	0.154091	0.278753	0.356366	0.132214	0.697792	0.577771	0.465892	0.453976	0.471045	0.880898	0.28155	0.295049	0.423034	0.100052	0.831861	0.553217	0.31284	0.473657	0.656888	0.237959	0.321148	0.36996	0.34614	0.678765	0.542521	0.131497	0.576813	0.311434	0.61106	0.342045	0.208655	0.267523	0.544495	0.468834	0.310127	0.270768	0.496221	0.386711
18.358	0.201377	0.482172	0.186381	0.289976	0.273613	0.102193	0.207205	0.257297	1.10028	0.43919	0.334867	0.123438	0.293567	0.33299	0.220261	0.74487	0.644124	0.40323	0.418781	0.51904	0.827647	0.341677	0.340942	0.565403	0.093148	0.731529	0.389057	0.300667	0.593378	0.634318	0.266228	0.261687	0.366563	0.300017	0.770534	0.606957	0.0573787	0.669474	0.359871	0.622399	0.404954	0.319401	0.330851	0.515474	0.458428	0.326547	0.178839	0.435856	0.508617
18.495	0.17987	0.493936	0.170547	0.232175	0.297121	0.131531	0.346085	0.243621	0.898024	0.396985	0.178512	0.153826	0.291178	0.436294	0.185	0.532255	0.689396	0.490192	0.583546	0.511148	0.792461	0.35543	0.34812	0.516688	0.127814	0.576204	0.285124	0.304264	0.526888	0.570903	0.104108	0.286791	0.421394	0.326704	0.657106	0.662788	0.123686	0.648374	0.431554	0.63504	0.379436	0.307562	0.297999	0.460873	0.448533	0.370503	0.21797	0.414442	0.639426
18.632	0.0955401	0.554982	0.213737	0.133301	0.338775	0.0992439	0.382121	0.250236	0.678456	0.377326	0.275411	0.129768	0.245836	0.438631	0.0326037	0.577994	0.661558	0.499541	0.557789	0.409673	0.694242	0.23693	0.246028	0.516997	0.106053	0.669463	0.266633	0.283904	0.456967	0.496948	0.126034	0.36582	0.346329	0.280477	0.574666	0.578907	0.0783553	0.743891	0.467686	0.597189	0.34557	0.258371	0.271991	0.496409	0.396038	0.416926	0.266771	0.42119	0.586414
18.769	0.110565	0.556656	0.198193	0.259944	0.29688	0.185517	0.325347	0.250682	0.652874	0.295101	0.277699	0.168673	0.264559	0.415822	0.206093	0.613901	0.72997	0.50585	0.452781	0.422135	0.644344	0.332611	0.392447	0.555825	0.12028	0.61155	0.239739	0.259904	0.528469	0.510549	0.182325	0.434385	0.562121	0.219666	0.645887	0.63115	0.08416	0.677638	0.478572	0.575035	0.397272	0.323394	0.370121	0.500412	0.345337	0.433621	0.286222	0.419923	0.525019
18.906	0.135484	0.55034	0.200175	0.204272	0.48708	0.114794	0.294233	0.226702	0.653286	0.334511	0.349213	0.172701	0.283014	0.359042	0.223161	0.548183	0.839399	0.508286	0.334501	0.446152	0.536652	0.31887	0.340388	0.54615	0.0727804	0.556157	0.260843	0.339148	0.624169	0.410644	0.306398	0.386902	0.4037	0.217633	0.447494	0.622782	0.0655671	0.647944	0.48271	0.608895	0.477304	0.316514	0.367841	0.516053	0.279424	0.470028	0.292645	0.440473	0.462008
19.043	0	0.594985	0.193778	0.14955	0.627839	0.116737	0.194724	0.234626	0.526303	0.395865	0.260489	0.202048	0.336505	0.412098	0.132465	0.395917	0.85916	0.469717	0.336507	0.469301	0.477761	0.330188	0.386001	0.552459	0.106787	0.515479	0.318539	0.333166	0.587517	0.361596	0.540357	0.367452	0.527068	0.22531	0.43595	0.614462	0.0565304	0.665019	0.441199	0.65923	0.374077	0.32746	0.47809	0.509329	0.252452	0.409222	0.274201	0.427044	0.440521
19.18	0.0125863	0.547071	0.309117	0.168625	0.575378	0.176185	0.187935	0.321255	0.633284	0.477787	0.258332	0.249772	0.247306	0.345543	0.160779	0.381686	1.01657	0.449784	0.359152	0.405363	0.527762	0.356539	0.365638	0.571593	0.0977856	0.629153	0.227037	0.363847	0.548775	0.4224	0.788123	0.283599	0.459633	0.272071	0.343498	0.582736	0.0387755	0.617693	0.379686	0.6081	0.245142	0.343062	0.377324	0.430861	0.254348	0.454092	0.166451	0.382806	0.444409
19.317	0.0460691	0.493357	0.261072	0.0619987	0.450296	0.180495	0.112849	0.230487	0.564267	0.371985	0.250237	0.259595	0.26216	0.385742	0.184256	0.461109	1.25969	0.482901	0.336956	0.452214	0.510369	0.35454	0.444765	0.460992	0.0406787	0.653699	0.288478	0.486115	0.556518	0.348269	0.942299	0.354362	0.383366	0.230837	0.33457	0.716492	0.0518961	0.59523	0.338319	0.657822	0.204138	0.378018	0.341899	0.398278	0.22367	0.460361	0.17318	0.377038	0.37653
19.454	0.0474419	0.496189	0.18843	0.10825	0.323555	0.193625	0.0644094	0.321967	0.540902	0.31979	0.231242	0.232958	0.305879	0.451832	0.14642	0.546032	1.11581	0.607716	0.391728	0.456861	0.430157	0.305811	0.367918	0.501733	0.083451	0.628924	0.278722	0.426741	0.529132	0.310248	1.00254	0.417673	0.310766	0.326621	0.342215	0.620567	0.0347433	0.488132	0.187329	0.600991	0.213171	0.349383	0.362151	0.374391	0.272452	0.405669	0.12575	0.493371	0.359106
19.591	0.0718542	0.497831	0.195368	0.117642	0.216767	0.203185	0.0511248	0.183215	0.563619	0.333557	0.156238	0.280381	0.274974	0.547295	0.181849	0.501817	1.28514	0.530141	0.498172	0.435084	0.393115	0.403683	0.36319	0.462419	0.0882933	0.633082	0.23697	0.494776	0.571393	0.359022	0.992663	0.468897	0.241821	0.359569	0.32384	0.64665	0.0341232	0.568793	0.208277	0.5149	0.191097	0.266682	0.301863	0.277526	0.303504	0.455861	0.19919	0.526601	0.360312
19.728	0.10676	0.514471	0.224729	0.140456	0.111629	0.153779	0.0894264	0.235747	0.544395	0.425785	0.179743	0.292582	0.27423	0.611256	0.236586	0.490975	1.21623	0.523395	0.367103	0.470264	0.463174	0.528556	0.275288	0.566689	0.122039	0.612402	0.192543	0.467581	0.495956	0.314405	0.742944	0.421986	0.249052	0.367995	0.411959	0.625086	0.0707835	0.546558	0.175026	0.505552	0.261368	0.254087	0.366139	0.276287	0.223084	0.565588	0.03733	0.545088	0.479058
19.865	0.0483194	0.521998	0.18169	0.109377	0.127109	0.216863	0.0824695	0.184478	0.51746	0.422683	0.186622	0.263698	0.212193	0.527549	0.186738	0.600238	0.93269	0.625205	0.427479	0.366571	0.444832	0.435355	0.243107	0.663409	0.09356	0.504267	0.140645	0.436025	0.473125	0.282133	0.709088	0.432356	0.182052	0.368492	0.415271	0.634798	0.0767535	0.546638	0.0763587	0.639218	0.322878	0.266641	0.416438	0.249386	0.28097	0.49271	0.107047	0.392531	0.292811
20.002	0.0504929	0.469339	0.338097	0.0450773	0.159828	0.253776	0.0376094	0.172215	0.440415	0.363302	0.221195	0.269853	0.156061	0.527776	0.185858	0.577249	0.95409	0.623893	0.604762	0.490734	0.378959	0.517299	0.242879	0.601311	0.101946	0.621237	0.192326	0.377402	0.511324	0.283974	0.555349	0.500397	0.173476	0.331366	0.303637	0.681322	0.108718	0.549895	0.242286	0.591451	0.325316	0.244824	0.317023	0.253906	0.303431	0.482965	0.136856	0.432637	0.422792
20.139	0.0929415	0.35862	0.208635	0.0439963	0.227569	0.26245	0.136769	0.194623	0.547213	0.497387	0.208713	0.287352	0.265209	0.544396	0.117514	0.474486	0.587594	0.678677	0.762391	0.539484	0.395482	0.526044	0.141245	0.678858	0.0929092	0.545115	0.237598	0.398287	0.43004	0.280398	0.44353	0.494173	0.147226	0.38951	0.224861	0.820745	0.0625735	0.499106	0.103939	0.514841	0.423578	0.205239	0.384144	0.150054	0.287663	0.502994	0.131227	0.442347	0.326457
20.276	0.0312012	0.39428	0.183313	0.100481	0.288764	0.220844	0.132119	0.156192	0.550611	0.415492	0.223978	0.284135	0.325509	0.477501	0.179905	0.429846	0.446275	0.528722	0.94939	0.442165	0.412341	0.49851	0.0752963	0.747997	0.118604	0.612662	0.207761	0.385952	0.328874	0.20488	0.192512	0.477003	0.135413	0.40758	0.141593	0.750586	0.0182466	0.43946	0.223625	0.484185	0.42099	0.202221	0.424154	0.125538	0.170127	0.382619	0.0270784	0.436983	0.335764
20.413	0.0582245	0.435189	0.226385	0.152662	0.341849	0.141507	0.0707091	0.145838	0.585203	0.457412	0.325599	0.321003	0.357545	0.514336	0.279531	0.394338	0.354535	0.491624	1.10613	0.462937	0.489047	0.431004	0.118208	0.709915	0.178097	0.598889	0.220677	0.323366	0.450219	0.186823	0.185302	0.53504	0.264892	0.421468	0.0772031	0.691119	0.0944532	0.499962	0.177314	0.550235	0.434717	0.279638	0.434475	0.14189	0.169182	0.536354	0.106803	0.425979	0.369517
20.55	0.0505474	0.278411	0.289274	0.133907	0.210949	0.244778	0.0815955	0.117432	0.652618	0.500383	0.222943	0.360929	0.347671	0.439498	0.149997	0.440751	0.393261	0.511966	1.26772	0.496179	0.505044	0.456371	0.204663	0.714841	0.110667	0.657919	0.233521	0.294724	0.247028	0.244378	0.133428	0.374429	0.310386	0.374778	0.0697581	0.940539	0.0960792	0.53931	0.0704187	0.394192	0.301129	0.259579	0.489443	0.121149	0.199356	0.445083	0.181402	0.464522	0.346208
20.687	0.0522182	0.321595	0.186973	0.132136	0.103768	0.231744	0.0930832	0.129553	0.691114	0.472395	0.201158	0.303841	0.349709	0.460318	0.151174	0.311744	0.301485	0.555333	1.02548	0.3343	0.494029	0.47977	0.174505	0.778683	0.100543	0.63327	0.27462	0.322542	0.37366	0.148962	0.15807	0.470767	0.359808	0.436445	0.170566	0.898883	0.104587	0.49395	0.124726	0.405196	0.547134	0.259346	0.568041	0.14253	0.161698	0.561808	0.155316	0.447388	0.340185
20.824	0.0418277	0.283031	0.217254	0.145722	0.136816	0.244965	0.135049	0.197274	0.637063	0.5827	0.19621	0.415976	0.350234	0.484635	0.201932	0.319332	0.288972	0.548578	0.751455	0.443489	0.429485	0.408698	0.182394	0.8217	0.0626016	0.446614	0.388134	0.300266	0.465701	0.13444	0.163644	0.513921	0.293187	0.508428	0.161837	0.879013	0.0310581	0.484254	0.199478	0.412892	0.807524	0.203166	0.741774	0.116591	0.132389	0.6119	0.137894	0.446941	0.321662
20.961	0.103135	0.27941	0.217658	0.0606611	0.109979	0.261489	0.0947682	0.226265	0.548038	0.578726	0.108331	0.433744	0.376675	0.524322	0.223085	0.268073	0.428841	0.529549	0.661305	0.492727	0.427768	0.422483	0.131854	0.772432	0.0540596	0.484959	0.489965	0.332168	0.463585	0.169187	0.189422	0.567457	0.239124	0.448155	0.143553	0.874995	0.0293753	0.56149	0.207207	0.466642	0.756827	0.227243	0.795126	0.15782	0.202893	0.506015	0.117101	0.434414	0.295872
21.098	0.10282	0.298743	0.131286	0.139539	0.0983283	0.269168	0.0688632	0.249869	0.587349	0.546846	0.111515	0.542081	0.257576	0.501482	0.296918	0.281269	0.419496	0.511374	0.619532	0.469086	0.453802	0.344273	0.154259	0.816592	0.091795	0.537321	0.541886	0.298743	0.362606	0.120872	0.146571	0.591509	0.250461	0.427812	0.107307	0.919797	0.123692	0.580269	0.207837	0.41318	0.587744	0.234353	0.597926	0.146881	0.299769	0.568409	0.123249	0.428781	0.205719
21.235	0.0937215	0.332303	0.117484	0.210829	0.0945085	0.300973	0.129812	0.139924	0.54084	0.62037	0.108572	0.415082	0.185192	0.478407	0.419672	0.30017	0.402613	0.546228	0.85993	0.461668	0.500508	0.28151	0.182954	0.71557	0.110387	0.492938	0.448741	0.222998	0.277734	0.143119	0.121668	0.394018	0.234514	0.360591	0.0838891	0.790368	0.0539923	0.451518	0.235967	0.338983	0.407542	0.176031	0.54942	0.185443	0.22999	0.654291	0.145826	0.349114	0.206979
21.372	0.101679	0.317988	0.194665	0.166715	0.0713785	0.196882	0.0603611	0.252229	0.636134	0.686447	0.129709	0.620255	0.160208	0.490523	0.444151	0.202624	0.364721	0.558087	0.966671	0.483938	0.486169	0.253732	0.153746	0.729822	0.11142	0.557058	0.670442	0.181437	0.195098	0.0877362	0.16952	0.446321	0.164687	0.398115	0.0939147	0.821311	0.129463	0.38743	0.243497	0.393346	0.366218	0.158932	0.563111	0.206392	0.169849	0.599178	0.262133	0.329725	0.304982
21.509	0.0434201	0.308563	0.184023	0.154955	0.0644606	0.273478	0.0273243	0.238694	0.558619	0.671473	0.165725	0.552382	0.171953	0.419436	0.452367	0.209786	0.15892	0.534426	1.03715	0.383248	0.486702	0.322913	0.274602	0.791278	0.164182	0.513201	0.695893	0.180439	0.179645	0.0771139	0.189486	0.437978	0.158268	0.372397	0.0572141	0.740994	0.105563	0.464087	0.206639	0.371339	0.371863	0.120395	0.444113	0.233397	0.297169	0.505149	0.326649	0.450063	0.30965
21.646	0.0809396	0.31974	0.205852	0.140515	0.0805156	0.215374	0.0280795	0.137756	0.690253	0.583149	0.13454	0.520464	0.20423	0.395463	0.496299	0.228923	0.19442	0.548308	0.999652	0.519497	0.451808	0.236874	0.296112	0.721636	0.149485	0.594503	0.75323	0.219359	0.201941	0.0591837	0.126733	0.579029	0.175523	0.320248	0.0573107	0.684031	0.0923277	0.461007	0.232365	0.327984	0.26977	0.274061	0.551914	0.222952	0.177099	0.491075	0.328891	0.41038	0.276001
21.783	0.136561	0.474304	0.1679	0.140385	0.0571303	0.262837	0.0192627	0.118841	0.834154	0.571149	0.116987	0.415604			0.588863	0.236325	0.143102	0.49792	0.937416	0.53573	0.475848	0.24824	0.327115	0.638735	0.124785	0.730354	0.683818	0.253773	0.177274	0.0364906	0.121153	0.474282	0.269169	0.438143	0.151011	0.613042	0.0916112	0.400593	0.230828	0.378748	0.246324	0.23928	0.594769	0.266621	0.128529	0.456117	0.446511	0.34787	0.19298
21.92	0.133126	0.409207	0.178206	0.178316	0.0593937	0.286233	0.0243318	0.141924	0.916367	0.572127	0.131378	0.563654			0.646334	0.282965	0.105876	0.495355	0.771424	0.527661	0.535476	0.176431	0.480753	0.735609	0.107726	0.699368	0.558116	0.25001	0.262434	0.0452429	0.186953	0.45248	0.244315	0.379158	0.211517	0.57605	0.0861373	0.395425	0.176149	0.438165	0.249679	0.23774	0.439294	0.279699	0.141397	0.569018	0.580179	0.348795	0.215973
22.057	0.115996	0.501396	0.199434	0.221879	0.0775452	0.276815	0.0342323	0.179243	0.705469	0.552101	0.108331	0.548901			0.708785	0.235816	0.108167	0.558657	0.654992	0.482022	0.506878	0.227909	0.684701	0.683028	0.104067	0.713357	0.372902	0.197249	0.266816	0.0947986	0.186064	0.39092	0.200778	0.333966	0.213118	0.444637	0.095404	0.342179	0.244877	0.480453	0.177859	0.321492	0.44325	0.358773	0.171555	0.488317	0.67821	0.224458	0.193297
22.194	0.133746	0.342457	0.187789	0.199178	0.0762981	0.277451	0.0248982	0.220433	0.582766	0.509974	0.0804907	0.44634			0.541871	0.173441	0.106522	0.591856	0.463762	0.468624	0.483335	0.236602	0.761458	0.571328	0.0870126	0.675773	0.3102	0.136791	0.306443	0.0722283	0.114429	0.444325	0.257539	0.40956	0.269373	0.497009	0.0779738	0.418849	0.285802	0.421849	0.184671	0.352679	0.472517	0.384046	0.152243	0.55458	0.481385	0.225748	0.177582
22.331	0.0988413	0.422623	0.218152	0.264958	0.0418461	0.242618	0.0158786	0.134813	0.442096	0.433853	0.102918	0.515194			0.609607	0.21278	0.169112	0.615671	0.406656	0.461854	0.418411	0.19181	0.531398	0.573364	0.0945802	0.722461	0.389143	0.130618	0.295652	0.0833334	0.05083	0.386488	0.273261	0.385456	0.336509	0.604481	0.166036	0.474441	0.192385	0.360706	0.221064	0.400603	0.350388	0.418269	0.0217218	0.68179	0.363384	0.26884	0.207025
22.468	0.138773	0.297812	0.23789	0.262031	0.0237143	0.203572	0.0797636	0.120054	0.59961	0.470147	0.121111	0.579601			0.560086	0.167125	0.131365	0.579174	0.378558	0.437185	0.447674	0.10205	0.409767	0.578789	0.169018	0.750326	0.400656	0.0832968	0.314038	0.0970696	0.0995224	0.532642	0.21035	0.410007	0.489397	0.512786	0.108259	0.485836	0.17892	0.362402	0.234444	0.443329	0.311586	0.450327	0.10929	0.41535	0.361721	0.209349	0.195996
22.605	0.100806	0.35126	0.234646	0.215712	0.0725765	0.291903	0.095775	0.11313	0.676561	0.439525	0.13054	0.569442			0.818554	0.193512	0.124217	0.63823	0.268034	0.52477	0.518697	0.130862	0.36082	0.517386	0.211867	0.635069	0.328275	0.169427	0.311734	0.114914	0.136469	0.547091	0.199471	0.376293	0.612346	0.492843	0.134078	0.438527	0.183646	0.397011	0.222857	0.406825	0.25374	0.43134	0.190816	0.475603	0.263934	0.191158	0.189508
22.742	0.125147	0.35229	0.215139	0.314586	0.079622	0.357055	0.0752818	0.0611022	0.68281	0.430255	0.141032	0.594623			0.891415	0.256473	0.210839	0.62382	0.311078	0.368975	0.460354	0.116512	0.340752	0.557721	0.259204	0.623663	0.351998	0.182043	0.356222	0.0987595	0.0526713	0.492221	0.245296	0.344989	0.472727	0.541233	0.142686	0.358187	0.231529	0.388813	0.441774	0.365095	0.182793	0.421415	0.152528	0.428325	0.171517	0.249494	0.148752
22.879	0.186134	0.447166	0.142164	0.265274	0.0687272	0.348073	0.0991941	0.0167313	0.801081	0.429553	0.0734085	0.610088			0.98502	0.173331	0.116852	0.570009	0.343825	0.342429	0.498448	0.126948	0.295755	0.586021	0.345219	0.621278	0.311615	0.172127	0.397116	0.11588	0.0658638	0.55095	0.347778	0.402885	0.526898	0.525878	0.0764822	0.243182	0.235697	0.415423			0.251837	0.364444	0.265568	0.373747	0.22755	0.230378	0.222096
23.016	0.106901	0.400958	0.199191	0.395677	0.0504628	0.310241			0.885293	0.353721	0.0984294	0.602702			0.813824	0.191921	0.0254814	0.686083	0.354098	0.344436	0.569764	0	0.204082	0.499794	0.300671	0.562364	0.302125	0.216927	0.528022	0.0843728	0.0758746	0.440986	0.306832	0.381895	0.626367	0.510542	0.107705	0.263117	0.250031	0.365272			0.218056	0.384493	0.271537	0.467527	0.266771	0.146672	0.150923
23.153	0.0958984	0.374559	0.188209	0.369998	0.0495152	0.236158			0.885575	0.409628	0.15258	0.59727			0.761836	0.161887	0.135686	0.706189	0.39892	0.258145			0.174469	0.446338	0.320173	0.503038	0.295008	0.352272	0.549829	0.0731776	0	0.523349	0.187246	0.362774	0.632674	0.499742	0.163861	0.203864	0.204257	0.40384			0.204169	0.48818	0.263225	0.463639	0.228816	0.185845
23.29	0.0588882	0.0852943	0.125185	0.417015	0.0638272	0.257329			0.859418	0.414643	0.141498	0.557779			0.758298	0.132426	0.154773	0.717395	0.384738	0.293213			0.210116	0.443771	0.291341	0.36289	0.226903	0.383917	0.631224	0.131007	0.0496801	0.546743	0.174245	0.436615	0.622193	0.470512	0.244674	0.18127	0.101668	0.301942			0.235989	0.537778	0.309773	0.53328	0.234491	0.245335
23.427			0.108339	0.419416					0.772356	0.448638	0.133425	0.546369			0.778867	0.107937	0.100374	0.806017	0.318308	0.268191			0.294675	0.482034	0.328116	0.28	0.258256	0.297258	0.485298	0.10144	0.0969897	0.537777	0.173803	0.445087	0.600354	0.561176	0.170978	0.218487	0.19177	0.414455			0.263833	0.44199	0.24638	0.485009	0.22218	0.243376
23.564			0.151784	0.393494					0.674818	0.378895	0.0575756	0.53486			0.768556	0.153752	0.0815911	0.884093	0.335475	0.241261			0.386509	0.501614	0.344374	0.21253	0.233206	0.307605	0.450031	0.17681	0.0499199	0.545925	0.184409	0.503894	0.49709	0.555396	0.113137	0.216462	0.196664	0.345106			0.0455502	0.284571	0.223934	0.520417	0.215025	0.209835
23.701			0.178652	0.374499					0.616648	0.36634	0.0914638	0.576325			0.670752	0.141803	0.15175	0.94447	0.25835	0.149206			0.454664	0.41897	0.251393	0.169376	0.368083	0.1539	0.323553	0.158029	0.0723331	0.395298	0.207887	0.449795	0.428064	0.564214	0.204271	0.179207	0.0157012	0.209892			0.300817	0.461097	0.177561	0.513285	0.291211	0.178724
23.838			0.171801	0.284067					0.576836	0.411862	0.050355	0.469425			0.730667	0.0637476	0.116366	0.814406					0.410326	0.331179	0.182307	0.135237	0.350739	0.283733	0.334735	0.102761			0.189055	0.393382	0.37412	0.628028	0.224383	0.219496	0.097065	0.32784			0.307169	0.532555	0.184423	0.521952	0.384299	0.219584
23.975			0.159984	0.31486					0.54808	0.400725	0.146839	0.449398			0.704039	0.0851667	0.0620759	0.728091					0.385625	0.352981	0.24982	0.0785572	0.237725	0.310122	0.321402	0.117533			0.207473	0.38163	0.39099	0.506886	0.211677	0.211323	0.0980676	0.385616			0.242516	0.572199	0.28291	0.516046	0.344666	0.279148
24.112			0.154527	0.340656					0.562586	0.412418	0.132828	0.39489			0.635483	0.0861056	0.0752262	0.697405					0.332405	0.400569	0.271594	0.123958	0.179654	0.328161	0.162063	0.215883			0.241861	0.475087	0.425883	0.508812	0.226332	0.181773	0.0936349	0.426378			0.193641	0.624144	0.135765	0.480962	0.373193	0.175824
24.249			0.174815	0.250695					0.590794	0.437189	0.186359	0.452991			0.683311	0.0673771	0.0530795	0.641219					0.146835	0.369212	0.337362	0.127523	0.178529	0.289207	0.226616	0.170276			0.17262	0.353457	0.458761	0.535711	0.283879	0.186308	0.103471	0.413642			0.214477	0.586744	0.114907	0.446227	0.365565	0.290914
24.386									0.805116	0.320914	0.225792	0.335083			0.483672	0.0768508	0.137875	0.629888					0.104	0.334258	0.263843	0.123523	0.195807	0.279526	0.239799	0.152292			0.129908	0.314062	0.472409	0.440106	0.227378	0.252447	0.0867186	0.413971			0.178527	0.587986	0.0702772	0.523955	0.29057	0.296869
24.523									0.625062	0.364211	0.154438	0.247255			0.533253	0.0589181							0.0972979	0.274705	0.208519	0.109041	0.157253	0.278391	0.218286	0.215617			0.215524	0.321925	0.49916	0.355435	0.245098	0.199784	0.0695392	0.429087			0.181702	0.698397	0.0653264	0.622548	0.23141	0.32442
24.66									0.884265	0.434284	0.134001	0.357871			0.504894	0.0728887							0.185599	0.259216	0.240659	0.123639	0.188849	0.280636	0.167979	0.231775			0.219004	0.331465	0.498767	0.32525	0.0896743	0.14364	0.117702	0.375226			0.216406	0.573283	0.058867	0.59289	0.234552	0.374912
24.797									0.851917	0.395007	0.261021	0.338146			0.450856	0							0.165077	0.230081	0.167109	0.160743	0.241831	0.393325	0.131553	0.211566			0.184522	0.308091	0.415664	0.260127	0.218702	0.232811	0.0874703	0.351598			0.285482	0.492329	0.144216	0.580398	0.163904	0.349335
24.934									0.644757	0.354868	0.171488	0.284998			0.45526	0.0363707							0.158444	0.220622	0.264956	0.187827	0.239992	0.257895	0.182493	0.280599			0.212999	0.314517	0.461135	0.205813	0.122216	0.236739	0.0677308	0.324562			0.230514	0.683389	0.122245	0.659107	0.112326	0.274305
25.071									0.71975	0.377551					0.435245	0.0740761							0.0985237	0.20607	0.374424	0.179194	0.161301	0.334983	0.157206	0.253143			0.193509	0.275855	0.535833	0.193861	0.130822	0.216281	0.0598829	0.31364					0.0799443	0.712719	0.108481	0.223342
25.208									0.540015	0.368428					0.522244	0.0151916							0.101175	0.185779	0.303736	0.228971	0.192484	0.28477	0.14792	0.322716			0.194062	0.264642	0.627637	0.228859	0.130063	0.210678	0.0676854	0.335093					0.0529496	0.61762	0.176948	0.215666
25.345									0.586117	0.343193					0.494613	0.0306064							0.11662	0.18342	0.2672	0.157769	0.144312	0.265033	0.143223	0.394518			0.166831	0.174515	0.612326	0.164892	0.115225	0.187831	0.100331	0.314841					0.113215	0.56758	0.142105	0.154523
25.482									0.626231	0.362898					0.467514	0.0529602							0.0992211	0.154827	0.269334	0.282521	0.209802	0.274688	0.160954	0.354145			0.199556	0.165298	0.438331	0.110225	0.146202	0.233714	0.0612874	0.344426					0.0914717	0.61426	0.123066	0.16061
25.619									0.708439	0.357029					0.306888	0.0336296							0.106818	0.199306	0.283296	0.323966	0.206833	0.24701	0.186479	0.359472			0.246622	0.177563	0.358871	0.124148	0.0368162	0.182646	0.0377795	0.413997					0.0738877	0.658669	0.153088	0.170557
25.756									0.694512	0.27748					0.229274	0.0381307							0.0627752	0.27983	0.294386	0.301277	0.186812	0.156443	0.149827	0.365508			0.183588	0.141708	0.361562	0.112152	0.194499	0.202813	0.0146654	0.392068					0.0329562	0.566015	0.18012	0.179831
25.893									0.562575	0.381043					0.244057	0.0581939							0.0763547	0.338525	0.240292	0.326056	0.191779	0.199903	0.134766	0.310252			0.223385	0.220399	0.388023	0.0699142	0.142176	0.172482	0.123775	0.382465					0.0320554	0.565856	0.129198	0.157369
26.03									0.624191	0.355139					0.166671	0.0479076							0.0639933	0.462556	0.160346	0.422454	0.173646	0.216739	0.201872	0.328068			0.151096	0.175182	0.438137	0.0617468	0.139138	0.202801	0.0523678	0.452276					0.0637299	0.555185	0.0459953	0.16969
26.167									0.682846	0.382475					0.217011	0.0578739							0.0632238	0.484102	0.195038	0.525521	0.162553	0.167592	0.175714	0.339844			0.274098	0.0845537	0.576315	0.0703276	0.135149	0.196957	0.0233793	0.379612					0.0530594	0.437679	0.161082	0.0618031
26.304									0.649188	0.414822					0.340501	0.0918488							0.129658	0.573139	0.202944	0.482672	0.146079	0.205172	0.1971	0.337368					0.653511	0.0718687	0.170242	0.175064	0.0858371	0.380248					0.0912593	0.553866	0.166208	0.107802
26.441									0.645117	0.480417					0.16866	0.0806193							0.0711259	0.561118	0.205384	0.471725	0.114282	0.192791	0.137728	0.340928					0.528837	0.0756293	0.22162	0.190223	0.0284561	0.461269					0.103922	0.538892
26.578									0.850972	0.391052					0.19197	0.11928							0.0795425	0.669898	0.116158	0.424216	0.0782087	0.230273	0.103733	0.363703					0.480365	0.0429117	0.14642	0.167579	0.015095	0.428932					0.0578857	0.476603
26.715									0.972449	0.427268					0.346735	0.0995583							0.0678653	0.580119	0.116496	0.354893	0.142658	0.219666	0.084149	0.408377					0.586327	0.0245623	0.0662725	0.108115							0.0615987	0.515786
26.852									1.00327	0.47084					0.266524	0.085394							0.0573155	0.634909	0.180196	0.344502			0.0742384	0.501257					0.791744	0.0325169	0.0977732	0.148931							0.110982	0.635771
26.989									0.954446	0.396329					0.259432	0.0916256							0.0375439	0.489271	0.141354	0.390602			0.126198	0.414425					0.759535	0.00655797	0.0689328	0.174182							0.0462265	0.496724
27.126									0.892601	0.357249					0.241711	0.161369							0.0588877	0.461986	0.115876	0.38061			0.127409	0.390578					0.475935	0.0118878	0.0351007	0.115773							0.0434436	0.500868
27.263									0.767131	0.336677					0.261976	0.109061							0.085337	0.582491	0.131161	0.442837			0.170525	0.430461					0.368048	0.0190157	0.0767259	0.143206							0.0111978	0.527278
27.4									0.557042	0.350063					0.17071	0.118632							0.0726276	0.50081	0.131724	0.338541			0.148749	0.473519					0.24365	0	0.147961	0.150522							0.052393	0.50069
27.537									0.392805	0.330377					0.193982	0.140784							0	0.477047	0.0638623	0.433836			0.107596	0.386989					0.411435	0.0152471	0.174574	0.166322							0.0695009	0.477829
27.674									0.334838	0.316041					0.259987	0.159853									0.143683	0.429307			0.143614	0.52438					0.326807	0.0491085	0.172981	0.106807							0.0166905	0.469062
27.811									0.35434	0.306074					0.259394	0.218767									0.0923733	0.464849			0.113678	0.413435					0.341339	0.0359324	0.21144	0.0882472							0.0874071	0.497508
27.948									0.434861	0.269302					0.414197	0.259428									0.138509	0.561965			0.109202	0.578334					0.254186	0.00384889	0.264283	0.151074							0.0574609	0.47596
28.085									0.323558	0.28473					0.380538	0.270666									0.156415	0.647178			0.230029	0.477991					0.341477	0.0709537	0.139993	0.156534							0.0678091	0.51042
28.222									0.204994	0.29143					0.288042	0.274367									0.175305	0.675921			0.129857	0.460069					0.396945	0.0778408	0.241141	0.14345							0.0674576	0.463561
28.359									0.182366	0.31326					0.288695	0.313627									0.0798695	0.684389			0.131107	0.422952					0.539062	0.00700346									0.0585155	0.494026
28.496									0.243585	0.293059					0.235864	0.162658									0.0730825	0.663651			0.103354	0.463301					0.501989	0.0555902									0.092951	0.541572
28.633									0.225164	0.227947					0.250754	0.197992									0.163777	0.757318			0.113189	0.554638					0.535288	0.0568625
28.77									0.319878	0.196765															0.0999092	0.871947			0.13228	0.538005					0.633771	0.123618
28.907									0.21106	0.184801															0.118159	0.847616			0.112934	0.678693					0.314112	0.149774
29.044									0.195092	0.153046															0.0909495	0.873651			0.150027	0.589165					0.353855	0.228859
29.181									0.228343	0.169846															0.0567308	0.891523			0.1282	0.635574					0.302478	0.224729
29.318									0.214505	0.188514															0.0735293	0.901049			0.168311	0.566795					0.211896	0.187789
29.455									0.220977	0.143148																			0.131961	0.514764					0.164294	0.19775
29.592									0.219391	0.150072																			0.136729	0.507259					0.147637	0.25373
29.729									0.270342	0.101209																			0.102636	0.548128					0.208384	0.223007
29.866									0.187304	0.129977																			0.0877787	0.519735					0.281758	0.271369
30.003									0.168017	0.129973																			0.0442165	0.461039					0.463122	0.368209
30.14									0.108625																				0.0883987						0.426518
30.277									0.108234																				0.0561671						0.441953
30.414									0.116184																				0.106181						0.241869
30.551									0.0623982																				0.0826788						0.167868
30.688									0.0530651																				0.0992233						0.0854071
30.825									0.108192																				0.103593						0.0491895
30.962									0.0544536																										0.104796
31.099									0.0623982																										0.0649006
31.236									0.0907002																										0.217154
31.373									0.128831																										0.0874495
31.51									0.130622																										0.102443
31.647																																			0.107618
31.784																																			0.121901
31.921																																			0.210578
32.058																																			0.137108
32.195																																			0.131505
32.332																																			0.0904785
32.469
32.606
32.743
32.88
33.017
33.154
33.291
33.428
33.565
33.702
33.839
33.976
34.113
34.25
34.387
34.524
34.661
34.798
34.935
35.072
35.209
35.346
35.483
35.62
35.757
35.894
36.031
36.168
36.305
36.442
36.579
36.716
36.853
36.99
37.127
37.264
37.401
37.538
37.675
37.812
37.949
38.086
38.223
38.36
38.497
38.634
38.771
38.908
39.045
39.182
39.319
39.456
39.593
39.73
[truncated: 7 more columns]

## Sheet: 5E
	Figure 6 - figure supplement 5E - Quantification of developing hair follicles at E15.5 after ectopic expression of WIF1-AQP4
	Control (counts/mm2) - 8 mm2 headskin sampled								WIF1 AQP4 (counts/mm2) - 8 mm2 headskin sampled
	Embryo 1	Embryo2	Embryo 3	Embryo4					Embryo 1	Embryo2	Embryo 3	Embryo4
Placode	16	2.5	7	15.5					14	4.5	1	1
Germ	6	7.5	6	3					4	4.5	2	3
Peg	2	0	0	5.5					0.5	0	0	0
	Control = krt14TA negative
