# Supplementary material for: Progenitors oppositely polarize WNT activators and inhibitors to orchestrate tissue development
Source: eLife. 2020 Apr 20;9:e54304. doi: 10.7554/eLife.54304 (PMC7224699; doi:10.7554/eLife.54304)
Supplement: Figure 6—source data 1. [file elife-54304-fig6-data1.xlsx]

## Sheet: Figure 6A-B
	Figure 6A - Quantification of developing hair follicles at E15.5 after ectopic expression of NOTUM
	Control (counts/mm2) - 11.6 mm2 headskin sampled								Notum OE (counts/mm2) - 11.8 mm2 headskin sampled
	Embryo 1	Embryo 1	Embryo2	Embryo 2	Embryo 3	Embryo3			Embryo 1	Embryo 1	Embryo2	Embryo 2	Embryo 3	Embryo3	Embryo 4	Embryo 4
Placode	12.7273	22.3809	23.8095	15.7143	5.71429	11.9048			10.9091	6.36364	6.36364	11.4286	5.2381	6	5	7
Germ	6.36364	14.7619	11.9048	12.381	5.71429	3.33333			0.909091	3.63636	0	3.57143	3.80952	2	4	3.5
Peg	5.45455	5.2381	5.71429	4.28571	1.42857	3.80952			0	0	0	3.57143	0.952381	0	0	2
	Control = krt14TA negative
	Figure 6B - Quantification of developing hair follicles at E15.5 after ectopic expression of NOTUM-AQP4
	Control (counts/mm2) - 8 mm2 headskin sampled								Notum AQP4 (counts/mm2) - 8 mm2 headskin sampled
	Embryo 1	Embryo2	Embryo 3	Embryo4					Embryo 1	Embryo2	Embryo 3	Embryo4
Placode	19.5	21	12.5	16					9	5.5	0	4
Germ	6.5	13	6	4.5					1.5	0.5	3	2.5
Peg	2	3.5	2.5	2					0	0	0	0
	Control = krt14TA negative

## Sheet: FIgure 6C
Figure 6C -Quantification of LEF1 fluorescence pixel intensity (a.u.)
		Normalized Pixel Intensity	Normalized Pixel Intensity	Normalized Pixel Intensity	Normalized Pixel Intensity				Normalized Pixel Intensity	Normalized Pixel Intensity	Normalized Pixel Intensity	Normalized Pixel Intensity
		Dermal Condensate	Dermal Condensate	Progenitor Cells	Progenitor Cells				Dermal Condensate	Dermal Condensate	Progenitor Cells	Progenitor Cells
		Control	NOTUM OE	Control	NOTUM OE				Control	NOTUM AQ4	Control	NOTUM AQ4
	1	0.478502	0.395003	0.705097	0.370207			1	0.314264	0.239619	0.383534	0.234523
	2	0.371314	0.425233	0.531753	0.418242			2	0.336658	0.187077	0.339041	0.165807
	3	0.560713	0.497516	0.670116	0.488663			3	0.295935	0.209041	0.315679	0.236995
	4	0.280633	0.418341	0.403793	0.451094			4	0.270005	0.238043	0.316575	0.277826
	5	0.280749	0.255297	0.350447	0.349791			5	0.330661	0.320739	0.288326	0.353515
	6	0.512699	0.194148	0.576964	0.327072			6	0.357652	0.237365	0.281594	0.325634
	7	0.200768	0.182011	0.281023	0.213512			7	0.168717	0.355672	0.227604	0.434126
	8	0.244814	0.145802	0.446967	0.274356			8	0.177478	0.455247	0.246141	0.472648
	9	0.235846	0.280621	0.413008	0.355128			9	0.313364	0.317599	0.429476	0.391906
	10	0.334147	0.263377	0.441148	0.338179			10	0.24264	0.345484	0.336017	0.439533
	11	0.33181	0.337461	0.420823	0.361856			11	0.333322	0.264161	0.341115	0.399126
	12	0.226729	0.443469	0.318839	0.367736			12	0.334559	0.251621	0.305574	0.344702
	13	0.255426	0.554225	0.294113	0.483288			13	0.299242	0.27938	0.380014	0.351863
	14	0.169717	0.419157	0.250992	0.415109			14	0.28195	0.24772	0.362045	0.362701
	15	0.217685	0.409831	0.312161	0.414757			15	0.219655	0.286466	0.272732	0.43292
	16	0.275639	0.397778	0.324506	0.46138			16	0.228509	0.334732	0.290751	0.457515
	17	0.277161	0.228656	0.439804	0.244999			17	0.27726	0.320407	0.380595	0.498959
	18	0.253551	0.397356	0.372453	0.407796			18	0.27156	0.292043	0.351319	0.392716
	19	0.266774	0.205745	0.408497	0.308221			19	0.251404	0.175193	0.291124	0.268654
	20	0.438465	0.267949	0.400242	0.411034			20	0.244024	0.150507	0.32326	0.307355
	21	0.354075	0.240533	0.398818	0.315537			21	0.287922	0.188541	0.394413	0.291912
	22	0.349314	0.226263	0.317536	0.290456			22	0.324205	0.241574	0.422071	0.381385
	23	0.427372	0.211688	0.475008	0.299634			23	0.300997	0.181429	0.401535	0.318341
	24	0.348366	0.192636	0.418405	0.261459			24	0.392129	0.256928	0.425878	0.321792
	25	0.413334	0.275903	0.403649	0.324852			25	0.310004	0.310447	0.353472	0.452189
	26	0.370235	0.311568	0.310825	0.386506			26	0.177145	0.253936	0.285485	0.435304
	27	0.477264	0.225878	0.39528	0.364984			27	0.253371	0.244877	0.344738	0.447958
	28	0.466802	0.264953	0.347714	0.361212			28	0.299375	0.309332	0.37012	0.435053
	29	0.246588	0.252356	0.294751	0.352743			29	0.248831	0.333455	0.318306	0.453683
	30	0.346439	0.210155	0.335185	0.339209			30	0.367758	0.160276	0.440866	0.130031
	31	0.419753	0.262496	0.349574	0.358374			31	0.442211	0.130536	0.525624	0.143864
	32	0.377826	0.202235	0.395328	0.339695			32	0.623815	0.309001	0.641654	0.366591
	33	0.43463	0.492577	0.501706	0.693558			33	0.478394	0.44891	0.565373	0.505974
	34	0.258546	0.363082	0.275797	0.412954			34	1.40354	0.541539	0.801151	0.455113
	35	0.394707	0.417959	0.424325	0.411413			35	0.651539	0.316811	0.574132	0.396721
	36	0.273176	0.245374	0.263312	0.299784			36	0.539494	0.412909	0.513203	0.291343
	37	0.218233	0.23348	0.304672	0.293955			37	0.614955	0.124792	0.507813	0.246166
	38	0.347964	0.263735	0.428106	0.300394			38	0.664391	0.443727	0.517228	0.436702
	39	0.470056	0.365268	0.525705	0.336644			39	0.618175	0.230747	0.851828	0.305403
	40	0.570347	0.251694	0.665322	0.282736			40	0.538703	0.5342	0.600313	0.55465
	41	0.440027	0.201415	0.506089	0.218358			41	0.576983	0.492887	0.539873	0.478722
	42	0.560926	0.281721	0.650486	0.289141			42	0.604466	0.343407	0.676	0.668837
	43	0.377485	0.344853	0.575197	0.309317			43	0.589408	0.285606	0.648568	0.431799
	44	0.428136	0.27563	0.537911	0.43194			44	0.651551	0.360327	0.64008	0.339926
	45	0.629468	0.453231	0.481988	0.614613			45	0.605441	0.261559	0.814533	0.320856
	46	0.512739	0.353288	0.604723	0.440557			46	0.633646	0.27064	0.621536	0.343545
	47	0.424508	0.472084	0.518781	0.472856			47	0.613182	0.302802	0.695451	0.468086
	48	0.704488	0.437003	0.756095	0.480077			48	0.635525	0.271681	0.704606	0.433223
	49	0.382431	0.496339	0.503673	0.390811			49	1.22688		0.901371
	50	0.495104	0.481789	0.483142	0.421015			50	0.570747		0.58105
	51	0.434643	0.561688	0.524565	0.510885			51	0.331998		0.469144
	52	0.443686	0.83812	0.489382	0.616444			52	0.523201		0.696858
	53	0.376932	0.727279	0.520269	0.553743			53	0.567629		0.698196
	54	0.641697	1.02456	0.534377	0.849615			54
	55	0.607396	0.316032	0.707357	0.502044			55
	56	0.602468	0.322365	0.458539	0.448655			56
	57		0.501476		0.477618			57
	58		0.724239		0.648268			58
	59		0.838871		0.855614			59
	60		1.08023		0.888104			60
	61		0.356647		0.486975			61
	62		0.418523		0.516325			62
	63		0.552065		0.432588			63
		Each color represents a set of WholeMounts from one or more embryos from a different litter							Each color represents a set of WholeMounts from one or more embryos from a different litter

## Sheet: Figure 6D
Figure 6D - Quantification of relative cell population size
		Dermal Condensate	Dermal Condensate	Progenitor Cells	Progenitor Cells	Progenitor Cells	Progenitor Cells			Dermal Condensate		Developng Hair Follicle		Developng Hair Follicle
		LEF1	LEF1	LEF1	LEF1	SOX9	SOX9			LEF1	LEF1	LEF1	LEF1	SOX9	SOX9
		Control	NOTUM OE	Control	NOTUM OE	Control	NOTUM OE		1	Control	NOTUM AQ4	Control	NOTUM AQ4	Control	NOTUM AQ4
	1	38.573	21.533	52.5293	23.5438	84.4764	91.9953		2	43.4525	23.9659	40.4758	42.8157	80.8619	85.973
	2	30.6254	27.2128	43.9516	48.3175	85.4398	83.2783		3	34.0213	25.9566	42.5988	44.1779	78.0622	90.2941
	3	32.1117	24.624	56.9428	27.8516	84.1447	84.3769		4	36.3743	25.7143	36.5216	36.7469	76.4767	95.5916
	4	39.2426	43.972	48.7541	59.4619	60.9037	79.0757		5	40.0642	33.8225	43.4193	40.283	79.8801	78.9131
	5	37.2633	54.2308	57.9587	41.301	85.812	83.7213		6	41.7546	42.3399	55.6448	28.3243	85.6586	78.3207
	6	33.4652	61.7873	62.9609	45.5999	72.3283	92.486		7	35.9537	35.2249	24.0003	53.1092	74.5747	91.4543
	7	28.4386	40.9078	50.0377	45.2895	82.3785	84.5514		8	56.3259	39.4579	37.089	50.6996	64.6009	69.463
	8	46.4011	40.4107	44.0346	35.9907	56.8831	84.3161		9	39.8343	39.5696	45.2431	60.866	78.7318	87.4917
	9	50.2506	82.5766	70.5147	80.3269	79.157	90.7901		10	41.3581	31.2914	58.9494	36.6107	76.8841	89.5723
	10	39.1025	61.8166	62.2354	84.9275	71.1639	86.9971		11	68.091	18.6134	65.6538	52.8078	85.1501	79.3497
	11	40.0828	30.9233	73.2942	61.6051	70.812	93.1046		12	34.6568	42.6061	40.7428	45.7456	71.4638	73.9453
	12	36.8411	32.9286	47.9408	53.8618	85.2741	94.1069		13	37.6837	29.8481	52.9277	37.259	73.0413	76.3528
	13	37.2327	24.1231	31.8135	27.9458	90.3983	86.183		14	31.7877	27.4908	49.5977	41.7375	90.3884	90.654
	14	40.0535	29.4765	65.0392	39.7102	78.4743	78.5469		15	64.6728	30.4789	49.519	48.5796	81.408	79.2343
	15	38.5105	17.4136	42.5417	36.8553	91.6658	74.4901		16	26.3109	28.8339	44.9282	44.1486	75.7201	89.0233
	16	34.0204	43.4757	46.2953	49.6003	84.3866	95.2284		17	22.8707	42.0667	56.8203	44.4482	84.413	82.7387
	17	39.4311	23.3525	50.2888	21.6352	87.9018	84.724		18	32.2591	36.0053	35.6745	26.4574	79.6266	85.6243
	18	53.3706	24.1463	39.3347	35.6697	72.8194	94.6369		19	34.901	35.1206	52.593	32.1757	84.7512	73.2613
	19	36.7554	25.5295	40.7092	33.0763	86.8781	94.3912		20	34.6961	27.5674	32.3096	41.3608	84.6785	92.1714
	20	25.114	34.7621	24.0726	45.2179	73.3052	84.9899		21	26.2457	39.9753	42.6142	31.896	82.9712	87.4057
	21	33.1552	35.2766	27.7228	29.7456	73.2633	96.2203		22	44.5632	44.241	34.6357	45.5873	83.4692	80.5327
	22	18.8057	34.563	20.4372	40.5397	87.9751	83.8414		23	46.3689	51.3129	46.0415	60.8347	70.8258	82.4532
	23	32.3954	31.9168	25.3434	37.2199	68.7388	80.4653		24	30.2116	42.1258	38.556	35.6199	78.5256	85.283
	24	35.0101	42.4708	27.518	30.5187	96.7267	82.5816		25	33.1504	26.4046	52.7569	34.7074	60.43	99.9756
	25	25.3131	33.8714	20.8859	39.9427	77.0895	87.0606		26	31.7325	37.9942	45.6822	50.0068	80.5998	91.5913
	26	32.4209	32.056	31.1295	49.9302	88.5643	84.8561		27	31.3077	31.1194	43.5397	34.0614	74.5787	99.3025
	27	28.7084	46.2413	24.3525	43.3979	88.1929	84.5283		28	36.6397	38.5796	66.3046	40.8011	83.8764	71.5183
	28	25.2095	40.3171	32.012	50.1458	83.5257	88.1114		29	30.4239	36.6066	34.4595	33.6246	81.6628	86.7414
	29	32.6787	62.3559	36.7154	31.6959	92.555	89.8485		30	31.0929	22.7885	58.981	32.3164	75.6381	82.3482
	30	33.6678	34.7082	33.6105	44.3967	93.5297	83.575		31	22.2168	49.9165	53.6016	39.4599	82.5758
	31	25.8605	26.9945	29.3125	30.6189	88.5116	92.6256		32	22.3198	30.3275	33.8116	45.1166	79.5822
	32	30.1632	45.8436	54.4043	44.7718	72.7346	87.7231		33	27.361	48.4616	34.6642	44.4188	82.6178
	33	30.7393	35.2501	21.7181	26.5445	85.4566	82.8894		34	34.9837	45.4072	35.4913	59.0065	84.9999
	34	25.2035	30.6144	38.3944	28.2873	90.6286	86.8001		35	33.3515	21.5885	39.6012	30.5242	87.4551
	35	26.0453	28.8056	24.27	21.2033	84.4574			36	27.0241	24.1891	34.1785	36.8935	85.7914
	36	24.7069	49.5723	21.4844	40.89	77.5659			37	24.2211	36.8892	31.2464	43.3808	92.0971
	37	44.3322	31.517	60.8286	29.8116	87.0738			38	39.7716	39.6235	25.8188	28.7009	73.7797
	38	53.3479	30.8188	54.2144	26.7092	83.1798			39	25.921	23.5129	24.3384	46.1998	79.7192
	39	35.0072	36.0598	59.8378	39.8651	80.9817			40	30.2399	20.891	49.1314	35.0737	83.6467
	40	43.7978	28.8092	50.0386	29.6814	89.0404			41	40.0428	22.6412	36.4755	50.4245	91.1342
	41	33.7426	30.3738	52.6935	38.6187	88.1584			42	31.8162	40.1167	23.3849	45.6137	82.2312
	42	25.0593	21.3366	33.6257	34.7261				43	47.5517	18.1583	42.4188	42.6469	92.7879
	43	48.3603	22.4239	48.558	29.443				44	35.8758	29.2863	23.2464	29.2601	87.6052
	44	44.9361	65.9981	38.2459	53.476				45	30.6619	34.2836	33.5374	27.934	89.8044
	45	28.8319	43.9134	33.4769	59.1175				46	34.8431	24.1941	45.0467	22.9547
	46	28.2338	30.6851	28.5121	57.503				47	34.2723	18.755	31.2878	42.0629
	47	44.1016	39.3559	48.3311	51.2676				48	30.0155	29.9299	50.4075	35.0681
	48	20.9737	29.0572	36.6295	31.9483				49	24.7058	20.5827	33.9806	64.9882
	49	30.6852	24.8802	37.5981	29.6485				50	23.1196		33.6276
	50	27.6451	26.8266	35.2065	31.206				51	19.7388		31.0763
	51	46.9676	21.5487	45.0577	31.8004				52	35.8025		43.6603
	52	39.1474	14.7339	38.4833	41.8286				53	29.715		35.5897
	53	29.3769	21.7935	41.756	25.3842					38.4108		38.365
	54	37.9657	34.8257	42.3988	22.5459					Each color represents a set of WholeMounts from one or more embryos from a different litter
	55	36.0985	41.5216	30.0637	41.4312
	56	44.8328	41.5433	27.5618	55.4678
	57	29.7817	22.5997	34.1264	22.3315
	58		28.5305		23.3388
	59		36.9058		17.6075
	60		35.8154		19.2958
	61		32.8535		45.4979
	62		37.3216		34.8233
	63		33.2984		41.3953
		Each color represents a set of WholeMounts from one or more embryos from a different litter
