# Supplementary material for: Progenitors oppositely polarize WNT activators and inhibitors to orchestrate tissue development
Source: eLife. 2020 Apr 20;9:e54304. doi: 10.7554/eLife.54304 (PMC7224699; doi:10.7554/eLife.54304)
Supplement: Figure 7—source data 1. [file elife-54304-fig7-data1.xlsx]

## Sheet: FIgure 7C
Figure 7C - Quantification of LEF1 fluorescence pixel intensity (a.u.)
			Normalized Pixel Intensity	Normalized Pixel Intensity	Normalized Pixel Intensity	Normalized Pixel Intensity
			Dermal Condensate	Dermal Condensate	Progenitor Cells	Progenitor Cells
			Notum fl/+ + LV Cre	Notum fl/fl + LV Cre	Notum fl/+ + LV Cre	Notum fl/fl + LV Cre
		1	0.293017	0.553828	0.376891	0.569209
		2	0.334368	0.545451	0.394443	0.527513
		3	0.294284	0.463027	0.445131	0.485435
		4	0.350988	0.398473	0.302237	0.651869
		5	0.34139	0.420829	0.248822	0.535284
		6	0.272327	0.521338	0.276442	0.51925
		7	0.410322	0.533471	0.258336	0.544451
		8	0.263768	0.606294	0.277914	0.634864
		9	0.262851	0.51056	0.304756	0.450241
		10	0.281424	0.339986	0.286097	0.288715
		11	0.210292	0.333025	0.221048	0.306387
		12	0.305976	0.357878	0.266723	0.2778
		13	0.275417	0.354761	0.373094	0.322781
		14	0.22381	0.370332	0.360698	0.480682
		15	0.284788	0.245914	0.254427	0.398517
		16	0.294921	0.377076	0.292845	0.332023
		17	0.206897	0.337002	0.24957	0.329053
		18	0.334826	0.306811	0.320184	0.307296
		19	0.31543	0.246678	0.317912	0.220678
		20	0.396749	0.249528	0.364244	0.250927
		21	0.266689	0.45871	0.332483	0.33689
		22	0.212768	0.315283	0.241814	0.372581
		23	0.230535	0.377975	0.359153	0.420778
		24	0.331598	0.260199	0.367354	0.356112
		25	0.343692	0.349316	0.377004	0.365511
		26	0.552402	0.354917	0.516362	0.304246
		27	0.376811	0.301907	0.57858	0.284557
		28	0.460727	0.294578	0.510484	0.294807
		29	0.190987	0.231854	0.348733	0.358227
		30	0.221525	0.318272	0.36725	0.286854
		31	0.225258	0.216176	0.309003	0.3438
		32	0.296313	0.231329	0.370617	0.264022
		33	0.312578	0.216681	0.285177	0.248064
		34	0.334539	0.228886	0.287129	0.228242
		35	0.257266	0.193452	0.339004	0.215385
		36	0.207176	0.233585	0.234865	0.258332
		37	0.183565	0.216603	0.231265	0.244852
		38	0.278073	0.186345	0.29156	0.279308
		39	0.231656	0.184179	0.283191	0.2621
		40	0.269123	0.215081	0.30846	0.290348
		41	0.183416	0.185587	0.357554	0.279196
		42	0.229722	0.227465	0.317604	0.229692
		43	0.158039	0.190828	0.327723	0.210667
		44	0.222376	0.241037	0.29955	0.195946
		45	0.191158	0.238705	0.248025	0.251256
		46	0.198854	0.198442	0.249324	0.239514
		47	0.161584	0.316245	0.241255	0.269805
		48	0.196869	0.228831	0.197753	0.231113
		49	0.205657	0.221863	0.195582	0.284077
		50	0.194492	0.203148	0.206329	0.237481
		51	0.217052	0.258156	0.268244	0.293791
		52	0.157338	0.242035	0.209351	0.263182
		53	0.153151	0.262105	0.254906	0.280055
		54	0.173147	0.210914	0.190661	0.240552
		55	0.194514	0.207633	0.294098	0.264816
		56	0.215195	0.182982	0.28744	0.324952
		57	0.235091	0.222315	0.218267	0.241904
		58	0.213602	0.257306	0.273441	0.291995
		59	0.218832	0.202129	0.241393	0.253424
		60	0.200595	0.180065	0.231713	0.335898
		61	0.340524	0.262313	0.188768	0.274008
		62	0.237991	0.174435	0.202191	0.280142
		63	0.14084	0.135796	0.251367	0.262654
		64	0.288333	0.341205	0.283067	0.324902
		65	0.370734	0.178392	0.490845	0.149183
		66	0.803225	0.283033	0.792209	0.274931
		67	0.189108	0.252432	0.205713	0.250051
		68	0.204671	0.336991	0.282021	0.292329
		69	0.248521	0.256512	0.370655	0.202741
		70	0.158672	0.1444	0.19083	0.248354
		71	0.157094	0.17472	0.149619	0.139252
		72	0.187544	0.139037	0.208301	0.176432
		73	0.229069	0.301149	0.236733	0.269004
		74	0.129399	0.150994	0.164305	0.164248
		75	0.182967	0.16173	0.175249	0.155134
		76	0.171705	0.198188	0.168953	0.16703
		77		0.258517		0.226047
		78		0.155997		0.0784037
		79		1.204		0.9174
		80		0.650796		0.802931
		81		0.556441		0.770853
		82		0.783417		0.793316
		83		0.502333		0.57641
		84		0.44155		0.508526
		85		0.769397		0.906319
		86		1.11571		1.07829
			Each color represents a set of Whole Mounts from one or more embryos from a different litter

## Sheet: Figure 7D
Figure 7D - Quantification of relative cell population size
		Dermal Condensate	Dermal Condensate	Progenitor Cells	Progenitor Cells	Progenitor Cells	Progenitor Cells
		LEF1	LEF1	LEF1	LEF1	SOX9	SOX9
		Notum fl/+ + LV Cre	Notum fl/fl + LV Cre	Notum fl/+ + LV Cre	Notum fl/fl + LV Cre	Notum fl/+ + LV Cre	Notum fl/fl + LV Cre
	1	20.547	31.1012	12.5386	55.5375	89.2264	83.9917
	2	28.9289	36.4439	17.6671	43.8295	84.9272	73.8626
	3	19.5605	36.787	25.4655	46.9582	90.2179	72.1574
	4	33.9671	27.6573	47.2084	23.3362	77.227	79.745
	5	33.3255	12.7643	27.957	33.4274	76.1187	81.8368
	6	35.9777	25.461	33.9936	41.3944	75.2315	92.733
	7	27.4392	36.4774	47.7075	47.1964	77.2635	80.8072
	8	24.8095	21.8353	20.2236	35.7142	82.9093	90.2105
	9	28.8579	35.2777	29.461	67.3116	79.8451	82.2935
	10	33.0321	23.2752	20.2719	34.5788	83.6303	84.2162
	11	34.0767	19.7693	21.076	22.0999	91.7497	67.9133
	12	25.8161	20.3475	31.8957	37.894	82.2158	80.7622
	13	32.6284	26.7828	26.1785	49.3861	87.6459	83.1855
	14	22.5341	28.0788	27.4131	39.8208	84.3337	79.7923
	15	27.5067	26.0982	34.019	19.1738	92.8156	85.3225
	16	33.6356	40.5932	22.9019	37.1068	86.1803	92.6471
	17	24.3469	49.8138	27.7046	54.9679	93.0148	81.4719
	18	28.2697	52.0852	31.1132	38.1231	83.7948	88.3298
	19	28.5631	32.2807	29.685	52.1639	70.8186	79.1245
	20	26.0305	27.3958	51.4559	39.3689	84.8686	82.2168
	21	25.6451	40.4229	20.0617	36.0716	86.3274	81.5836
	22	23.7279	22.3439	26.2107	41.7407	79.6552	66.5834
	23	24.1654	18.042	14.5672	53.2301	81.1829	86.7095
	24	25.4424	29.2695	14.647	31.6101	83.4877	66.8993
	25	39.159	30.4023	35.137	22.8745	95.759	80.8897
	26	39.2841	33.6295	33.3279	43.3319	85.8768	78.7331
	27	25.0513	21.0662	21.724	36.6969	75.6624	76.5342
	28	24.9183	18.4879	28.9578	34.4543	82.6349	84.3877
	29	30.0473	13.7742	35.5844	23.7981	93.5031	79.0557
	30	34.3703	26.5028	21.3551	38.6229	82.8939	73.9004
	31	36.4684	38.9473	25.2266	28.9124	83.3407	86.41
	32	32.5185	34.913	29.3896	39.8623	73.6479	90.7168
	33	19.9171	25.7397	28.3358	33.9659	79.6305	86.2441
	34	41.0472	27.0354	57.5162	21.9699	75.8522	90.035
	35	31.6659	22.3395	27.306	26.5901	84.502	92.102
	36	33.3623	18.7042	32.7435	33.7538	79.1992	80.5155
	37	25.9587	23.9764	20.288	31.8296	90.2692	76.4016
	38	33.7932	28.4445	42.5834	31.5869	81.3677	75.5281
	39	18.1253	19.2629	51.284	33.3744	73.9235	77.5398
	40	28.8018	27.8702	47.3782	13.9541	71.944	79.95
	41	22.1972	35.5604	23.8523	22.8069	87.8985	74.9843
	42	23.5669	22.0319	20.9923	29.7548	82.4338	83.6087
	43	18.8632	20.8093	18.2154	26.2196	77.2399	90.5746
	44	27.4453	34.0899	24.9763	40.2688	75.7111	81.6002
	45	33.9443	37.5681	28.8937	51.9419	90.3556	78.4156
	46	25.0938	19.8819	19.1351	41.1874	89.959	89.045
	47	24.3045	34.9435	26.0619	37.9126	80.8125	83.9348
	48	34.3615	24.9081	35.2949	40.9917	71.1239	78.8494
	49	37.6653	16.9985	30.347	26.7199	74.6328	87.3234
	50	36.234	30.5074	44.8011	31.99		89.2557
	51	24.6737	25.2491	20.2172	31.9865		76.4917
	52	22.1286	25.7206	22.1558	39.3718
	53	26.6745	18.7949	23.9891	43.7306
	54	26.5049	17.6309	30.5933	32.4842
	55	24.6088	23.9822	19.6536	18.636
	56	20.0707	16.2674	31.855	22.1099
	57	36.5275	20.166	46.0544	35.4766
	58	35.784	24.4258	26.3065	38.9738
	59	23.014	24.8007	24.9075	23.293
	60	27.4255	20.3992	29.2457	17.7036
	61	47.0079	19.1148	43.3021	38.9583
	62	16.974	29.0113	38.19	17.9515
	63	25.6111	28.9825	21.6312	17.381
	64	54.6867	59.2591	46.3972	48.5491
	65	37.3381	39.6695	46.3005	42.9815
	66	19.9856	23.3498	19.9856	43.4066
	67	28.8913	35.0071	37.0302	28.9592
	68	23.8555	23.1572	32.5036	40.9112
	69	29.9544	25.5119	19.1919	35.6343
	70	20.2387	20.5405	36.8641	23.4426
	71	31.9145	30.723	30.2342	36.5098
	72	18.2612	25.7716	31.9323	16.338
	73	24.4345	64.5569	36.7094	57.3899
	74	25.8531	23.0502	25.2333	36.7575
	75	37.4392	30.3883	31.917	24.7106
	76	43.1572	33.5838	35.5841	37.5009
	77		25.1035		44.5397
	78		26.2387		35.8783
	79		34.0532		27.4315
	80		21.6364		32.4524
	81		26.0548		42.7572
	82		16.3035		31.8364
	83		49.4133		37.939
	84		31.2147		37.4266
	85		23.5071		41.3382
	86		27.1833		39.8972
		Each color represents a set of Whole Mounts from one or more embryos from a different litter
